# Supplementary material
Source: PubMed Central journal article supplement (PMC6640137)
Supplement: NIHMS1040881-supplement-Heler_CellHostMicrobe_2019_Data_S1.pdf [file NIHMS1040881-supplement-Heler_CellHostMicrobe_2019_Data_S1.pdf]

| Bin (kb) | Sum Normalized Reads Replicate 1 | Sum Normalized Reads Replicate 2 | Sum of PAMs |
|----------|----------------------------------|----------------------------------|-------------|
| 1        | 75135.70189                      | 96916.33065                      | 63          |
| 2        | 66514.73417                      | 76101.78315                      | 32          |
| 3        | 96224.79744                      | 134446.2189                      | 67          |
| 4        | 95265.89447                      | 118575.6889                      | 61          |
| 5        | 54582.20622                      | 61719.70813                      | 47          |
| 6        | 61270.23582                      | 64118.26468                      | 60          |
| 7        | 42006.5602                       | 34075.208                        | 56          |
| 8        | 47130.39925                      | 37879.72366                      | 60          |
| 9        | 25662.99897                      | 25369.02567                      | 49          |
| 10       | 44391.47293                      | 34268.87479                      | 48          |
| 11       | 33898.89228                      | 26204.13097                      | 63          |
| 12       | 24281.58934                      | 18828.02919                      | 68          |
| 13       | 24905.19484                      | 15443.05138                      | 54          |
| 14       | 13730.47101                      | 11350.90304                      | 45          |
| 15       | 19452.82799                      | 12257.03421                      | 54          |
| 16       | 22278.96351                      | 16417.12032                      | 67          |
| 17       | 19155.361                        | 18297.76158                      | 66          |
| 18       | 15772.52018                      | 13655.93485                      | 48          |
| 19       | 20416.90775                      | 15547.60497                      | 51          |
| 20       | 14282.79593                      | 9344.532773                      | 47          |
| 21       | 11885.14031                      | 10897.39631                      | 61          |
| 22       | 14721.62943                      | 12499.22798                      | 66          |
| 23       | 12951.56146                      | 8190.472829                      | 58          |
| 24       | 9763.846252                      | 8202.383998                      | 62          |
| 25       | 8350.181168                      | 7839.755071                      | 66          |
| 26       | 8395.577737                      | 6259.539964                      | 67          |
| 27       | 4726.021751                      | 4475.511519                      | 53          |
| 28       | 6818.644291                      | 5157.095086                      | 52          |
| 29       | 2950.378763                      | 3015.731566                      | 41          |
| 30       | 3174.175883                      | 4359.487908                      | 61          |
| 31       | 7468.133799                      | 6112.19439                       | 67          |
| 32       | 5170.430268                      | 4635.65057                       | 56          |
| 33       | 9170.505132                      | 6549.819568                      | 47          |
| 34       | 4910.793751                      | 4822.258887                      | 57          |
| 35       | 7564.501954                      | 7883.429358                      | 78          |
| 36       | 7884.269014                      | 8044.450719                      | 56          |
| 37       | 6287.823008                      | 5962.20189                       | 55          |
| 38       | 10971.2357                       | 7579.032813                      | 51          |
| 39       | 13233.49805                      | 11762.05896                      | 70          |
| 40       | 21049.67221                      | 15586.42656                      | 57          |
| 41       | 6191.454853                      | 9348.944317                      | 31          |

| Spacer Sequence       | Location | Strand | PAM | Reads Replicate 1 | Reads Replicate 2 |
|-----------------------|----------|--------|-----|-------------------|-------------------|
| CGTTCCATTGAATACTGTGT  | 2368     | -      | AGG | 52680             | 43714             |
| AAACATGTTGCGATGATGTC  | 2048     | +      | AGG | 30908             | 59970             |
| CAATCCATTCACTATTGCT   | 3503     | -      | TGG | 34547             | 34893             |
| ATAAAAAAAGTCTACTTGT   | 3239     | +      | TGG | 38980             | 29511             |
| TCTGATGAATATTCATCTCT  | 1424     | -      | CGG | 32678             | 31754             |
| AGCAATTCACACCCGCACAG  | 998      | +      | TGG | 29015             | 33743             |
| AGTATGCTTACTTTTTCTTG  | 3823     | -      | TGG | 15478             | 35193             |
| TGAAGCATAATACTGCTACT  | 3088     | -      | AGG | 23825             | 23247             |
| TAGAGATATAGAACCTCACT  | 5384     | +      | GGG | 28586             | 17408             |
| GCGCTTCAATAGTGATAGTA  | 4338     | -      | GGG | 23891             | 21139             |
| TTTTAATAACCTCAACATCT  | 1070     | -      | TGG | 27705             | 14436             |
| GTCAGTATGTACAGATTAAT  | 4241     | +      | AGG | 23623             | 17749             |
| TTCAAAAGTTTAGTATCTAT  | 698      | -      | AGG | 20913             | 18997             |
| GAGAACAACCATCCTACC    | 827      | +      | CGG | 21295             | 17109             |
| ACTTTCCATTACTTAAATCA  | 9043     | +      | TGG | 20484             | 16235             |
| GTAGAAGTACAGTATAACAAC | 2918     | +      | TGG | 13903             | 20869             |
| GTGAATTGCTAGTAGTGTGT  | 1181     | -      | TGG | 17596             | 15299             |
| TTGATTTCTGTCCACTGTGC  | 993      | -      | GGG | 12816             | 19034             |
| TTAGAATTGACACCTCAAGA  | 873      | +      | AGG | 13956             | 17740             |
| TGAAGAGAACACAGACGAAC  | 3540     | +      | AGG | 13776             | 17221             |
| ACCAACTGGCACGGATCAAT  | 7611     | +      | TGG | 15870             | 14919             |
| AGTAAGACGCCAAAAGTAAC  | 2465     | +      | AGG | 14924             | 14780             |
| TGTCCTTTACCTGTTACTTT  | 2458     | -      | TGG | 18648             | 11332             |
| ATATCTGAATTGTTATCAGT  | 3651     | -      | TGG | 12604             | 16568             |
| ACTTATTCGTCGTTGCTAC   | 5238     | +      | TGG | 7036              | 20037             |
| CTTTATCTAACATGATACAC  | 805      | +      | GGG | 11745             | 15515             |
| ACACCTCAATATACTTGC    | 15249    | +      | TGG | 18831             | 8625              |
| AGAAAAACAACAACCTTAAT  | 2524     | +      | AGG | 11575             | 14250             |
| AGCACTCCTAATCGTCATCT  | 5893     | +      | TGG | 15066             | 10862             |
| AACACCTATTAACGTAGTAT  | 1449     | -      | TGG | 6680              | 17762             |
| GATTCCAATACTACGTTAAT  | 1461     | +      | AGG | 10539             | 13894             |
| ACGACATAAGCATGTTTAAT  | 3441     | -      | TGG | 11300             | 12864             |
| GGAAGAATACACGATGTTGT  | 10947    | +      | AGG | 14542             | 9865              |
| AAGAGAGTTATATAAAGCTT  | 1876     | +      | TGG | 12238             | 10403             |
| ATTAGAGCCTCAATATGCTT  | 16315    | -      | AGG | 12629             | 10004             |
| CACCTTAAAACGCTAAATCT  | 5152     | -      | TGG | 14897             | 6942              |
| GGACAAAAATCAATCAATAG  | 7069     | +      | TGG | 15414             | 6461              |
| ATACGTATGCACATTACACA  | 18135    | +      | AGG | 14115             | 7229              |
| TTTGATACCAATGATCTTAT  | 4917     | +      | TGG | 11700             | 9152              |
| TACTGATATCAACTTCTGT   | 9289     | -      | AGG | 11770             | 8804              |
| ACACAAATCCATCAATTGTT  | 2890     | +      | TGG | 11505             | 8805              |
| TGTACACGAGCATAGCTACC  | 23485    | -      | AGG | 13101             | 7169              |
| ACTTTATCTAACATGATACA  | 804      | +      | CGG | 11203             | 8729              |
| TCACTATAACAATTGCTTGT  | 12254    | -      | TGG | 13341             | 6540              |

|                      |         |     |       |       |
|----------------------|---------|-----|-------|-------|
| ATTGAATTAGTTACTCGATT | 4866 +  | AGG | 8544  | 10361 |
| CACAACGAGCAACATGCGAT | 5751 +  | TGG | 10590 | 8348  |
| TTAAAACCCCTAACCTTACT | 6272 +  | AGG | 10403 | 8348  |
| CCACACCCTTGCGTTTAATA | 2334 -  | AGG | 12777 | 6202  |
| GTTTAAGATATAGAATGCTT | 10634 - | TGG | 14243 | 4653  |
| TCTTGCAAATCATATTTATA | 4817 -  | CGG | 9145  | 9147  |
| GACAGAACTATTGAGTACG  | 3786 +  | AGG | 7503  | 10174 |
| CATATTAGATCGAGTCAAGG | 12415 + | AGG | 9707  | 8304  |
| ACTCGACGACCAAGATGTTG | 1077 +  | AGG | 9764  | 8119  |
| TCTACTACGTCCGTAATGCT | 4546 -  | AGG | 8857  | 8864  |
| ATTAGACGAGTTAATTAAT  | 10351 + | GGG | 10629 | 7132  |
| TCCAATTGATCCGTGCCAGT | 7596 -  | TGG | 9158  | 7773  |
| TCAAAGTGATGTGTTAGCTA | 4405 +  | GGG | 12854 | 4257  |
| CCTATTACAGATTCATCGTC | 11132 - | TGG | 6742  | 9699  |
| GGATATCGAAAAAGAAGCGC | 9340 +  | TGG | 10089 | 6677  |
| ATATTCATACCGTCATTCTT | 6358 +  | TGG | 12611 | 3900  |
| ATTGGAGCATGCAAATAACT | 1407 +  | TGG | 6564  | 9048  |
| AACAAAACGGTATAAACATC | 2289 +  | GGG | 8147  | 7615  |
| AAATAAAAAGATGCAACAAT | 399 -   | GGG | 8409  | 7227  |
| CTTAGACCAGAAACACTTTT | 7552 +  | TGG | 8467  | 7091  |
| TACAAGTGTACTTACAAGTA | 1966 +  | CGG | 7212  | 7930  |
| AAGTTACTACTCACACACTA | 259 -   | AGG | 7734  | 7383  |
| ATGTTGTTATCAAATATTTA | 1713 -  | AGG | 8482  | 6379  |
| TGTACTTGTTTTTCATTTTG | 7941 -  | TGG | 9521  | 5297  |
| TTATCTAATTGTTTATCGAT | 1389 +  | TGG | 5700  | 8679  |
| CATTAACGAAGGTGGAACAA | 3991 +  | CGG | 7465  | 6822  |
| GTAGAATTTTCAGCATCTTT | 2686 -  | CGG | 5714  | 8306  |
| GGTATGACTTTGGCCGAACT | 479 -   | AGG | 2686  | 10688 |
| ATATTAATCAGAGTGCCTGT | 2982 -  | TGG | 5350  | 8273  |
| GAAAAACAAAGATTTGTTTC | 6141 -  | GGG | 11672 | 2402  |
| AATAGAGCTAGGGAGTTTAA | 3709 +  | CGG | 11354 | 2603  |
| ATTAACGAATGAACTCAAT  | 18056 - | AGG | 7023  | 6481  |
| AGTTTTATAACGGCTCAGCA | 4684 +  | GGG | 6572  | 6794  |
| CAACCAGCACATTACACATA | 9862 +  | CGG | 5183  | 8028  |
| TGTTCCATGCTTTTTCAATT | 2091 -  | TGG | 2546  | 10306 |
| CCATCCTACCCGGTAATAAA | 837 +   | TGG | 7676  | 5575  |
| CCATTTGTTATCTCCTTTC  | 6863 -  | TGG | 6046  | 6835  |
| TTGATACGATCCATCAACAT | 8124 -  | TGG | 5946  | 6695  |
| CATTGGAAACGTTTAAGAAC | 12011 + | TGG | 8762  | 3959  |
| TTTTACAAAAGCTTTACCAT | 5991 +  | AGG | 6029  | 6392  |
| AACTTATATCATTGTCATA  | 3618 +  | GGG | 1147  | 10766 |
| ACTCCTAATCGTCATCTTGG | 5896 +  | CGG | 5350  | 6879  |
| TATAATTCATTCATGTTATT | 15351 + | TGG | 8006  | 4405  |
| TATTCATACCGTCATTCTTT | 6359 +  | GGG | 3306  | 8568  |
| ACACCAGAAAACACATATAG | 2830 +  | AGG | 5606  | 6468  |

|                       |         |     |      |      |
|-----------------------|---------|-----|------|------|
| ATTCACCCACAACAATATAT  | 21829 - | GGG | 8722 | 3648 |
| CGGAAAGCCTCACGCAGACC  | 5642 +  | TGG | 7059 | 4910 |
| TTTTGTATGCGTCAATGAGT  | 12308 - | TGG | 9713 | 2499 |
| TCTTTATACTCGTAACCATT  | 7797 -  | CGG | 7939 | 4095 |
| ACATCATCGCCCTTTTTGTA  | 5003 -  | AGG | 1662 | 9686 |
| CTTGATGTACTTCTTTGTGT  | 13373 - | TGG | 8380 | 3498 |
| TATCTTCCGTGCCATCTTCT  | 8632 -  | CGG | 7828 | 3796 |
| TCTTTTCTGCTAATTCATCA  | 14170 - | CGG | 7371 | 4195 |
| TCTGATTAATATTTCTAAAT  | 3009 +  | TGG | 5853 | 5548 |
| CAAAAGCAGTCAAAGCTAAA  | 8093 +  | GGG | 8413 | 3154 |
| TATTGGTAAGTTTTGTCACT  | 4934 +  | TGG | 3218 | 7715 |
| AATGAAGTTTATTCGCTCAC  | 8700 +  | AGG | 6895 | 4333 |
| TAAATATTGCAAGGTTCCATA | 8038 +  | CGG | 7009 | 4224 |
| GAATGATAACGATCTAATTC  | 19068 - | AGG | 8451 | 2867 |
| GTCAAGATGTATTACGAAAT  | 3328 +  | AGG | 6727 | 4400 |
| TTTGTTTCGGCGAACTTCAAA | 2724 -  | AGG | 4642 | 6245 |
| TACATTGATTATTCACCAAC  | 2983 +  | AGG | 6648 | 4359 |
| GCTAAGTATTTAAGACATGC  | 38827 + | AGG | 7419 | 3662 |
| TAGTGGCGTTCAAGAACTTA  | 7086 +  | TGG | 6731 | 4239 |
| CGTCAATATATGCTTTCCGT  | 14619 - | TGG | 5994 | 4886 |
| TTATTTGCTAATAGTTTGTT  | 2738 -  | CGG | 6259 | 4527 |
| AAGATTTAATAGATCTTAGC  | 24027 + | AGG | 7112 | 3405 |
| GAATTAGCTATCATAACTTC  | 1365 +  | TGG | 6463 | 3986 |
| TAACTTATATCATTTCGTCAT | 3617 +  | AGG | 816  | 8856 |
| AAATTCCACTTTGTTATTAC  | 4283 +  | AGG | 4506 | 5223 |
| CTTTATACTCGTAACCATT   | 7796 -  | GGG | 5898 | 3900 |
| GGATCTAAGTCAGTTTCAGC  | 22166 - | TGG | 6933 | 2923 |
| TAACTTAGTCATGAAATGGT  | 3573 +  | AGG | 6055 | 3643 |
| CTATATGTGTTTTCTGGTGT  | 2811 -  | TGG | 109  | 8989 |
| AAGAAAGTTTTAACTTAAGG  | 930 +   | AGG | 5450 | 4158 |
| AATAAGGAGTTAACTCGTAT  | 17877 + | AGG | 5323 | 4235 |
| ATTTAAGTGCTAAAGCTAAA  | 6971 +  | GGG | 6999 | 2581 |
| GGTATGAATAGAATGACGTT  | 14900 + | AGG | 7156 | 2424 |
| ACTAAGACATCAATTTTAGT  | 2246 +  | TGG | 3190 | 5823 |
| GTAGAGATATAGAACTTCAC  | 5383 +  | TGG | 6206 | 3081 |
| TGAATCAATCACACTTATTG  | 12809 + | AGG | 5605 | 3455 |
| AAGATTTAAATGTAGATAAC  | 39754 + | AGG | 5218 | 3738 |
| AGCAATCCATTTGAAAGCAG  | 5127 +  | TGG | 5730 | 3213 |
| AATACCACTTGCATGACTCG  | 5794 +  | TGG | 2602 | 6033 |
| AATCACGGAGCAAAGCGTAC  | 15147 + | AGG | 6051 | 2815 |
| AAATAACTTTATCCACATAA  | 6704 +  | AGG | 5790 | 3047 |
| AAAATAATAGCATCATCTA   | 6502 -  | TGG | 6725 | 1974 |
| CATGCCTACACAGTATTCAA  | 2380 +  | TGG | 4122 | 4208 |
| AACAGCTGAATGGTTAAACA  | 7515 +  | CGG | 6454 | 2075 |
| AAAAAGAAAAGTGAAATGGT  | 9072 +  | TGG | 7409 | 1211 |

|                        |         |     |      |      |
|------------------------|---------|-----|------|------|
| TGCGCTTCAATAGTGATAGT   | 4339 -  | AGG | 2473 | 5612 |
| CTCAAAGTGATGTGTTAGCT   | 4404 +  | AGG | 2916 | 5169 |
| CCACAATTAGCATTTGCAAT   | 9934 +  | AGG | 3966 | 4208 |
| TATATGACGCAAGCTCGTCC   | 30146 + | AGG | 5246 | 3016 |
| AATCCTTTTTTCGACATGAGT  | 7713 -  | AGG | 6141 | 2100 |
| AAAAATCCACCAGTGCCAGC   | 39334 + | AGG | 6206 | 2035 |
| TTCTATACTTCACTACAGCA   | 3154 +  | TGG | 4609 | 3397 |
| TGAATTTTACAGTCCTATGA   | 13169 + | TGG | 4255 | 3715 |
| AGCTAGGGAGTTTAACGGTA   | 3714 +  | TGG | 4966 | 3049 |
| ATTTTCAGCATCTTTCGGTA   | 2681 -  | TGG | 2171 | 5510 |
| TCTAAAAAACCTAAGTCAAC   | 21416 - | AGG | 5245 | 2733 |
| GTAGTAGAAGCAATTAGAAA   | 4577 +  | TGG | 5409 | 2570 |
| CGACTTAAGCAGGTGCCATA   | 21278 + | TGG | 4230 | 3534 |
| TGCTTATCTGTCTTCGGAAT   | 5036 -  | AGG | 6362 | 1461 |
| ATTTCTAATTTCCATCTGC    | 24053 - | TGG | 3656 | 3857 |
| CTCAACTTTGCGAAGTCACT   | 13745 - | CGG | 2565 | 4823 |
| GGTTCTTGTAATTATTTTC    | 6619 +  | AGG | 4593 | 2976 |
| ACTCATCGTTTGAATCGTCT   | 32540 - | GGG | 4389 | 3005 |
| CTTTGAATGGTTTAATACAT   | 11994 + | TGG | 3593 | 3679 |
| GCTGTAGTGAAGTATAGAAA   | 3134 -  | CGG | 4049 | 3260 |
| GTTTGAAGATGAAGAAACGT   | 18313 + | TGG | 4972 | 2284 |
| TCAGCTAAGCGCATGCCATA   | 9571 -  | AGG | 5268 | 1984 |
| CGGATTCCTTATTAACGCA    | 2344 +  | AGG | 5189 | 2051 |
| GGATTCCTTATTAACGCAA    | 2345 +  | GGG | 3125 | 3912 |
| AAATCTTCTTTTTCTTCAAT   | 16429 - | TGG | 3083 | 3934 |
| CTTGGTCGTCATATCCAAAT   | 5134 -  | TGG | 6213 | 1102 |
| AGATACCAGAAAGATAACGA   | 5214 +  | CGG | 1085 | 5638 |
| GCACGTTGCATAATCATTTTC  | 2116 -  | TGG | 1864 | 4932 |
| AAAAATAATCATGCGAGTTG   | 9227 +  | AGG | 2525 | 4306 |
| TTTATTAACCTTACAAAAA    | 5010 +  | GGG | 3822 | 3048 |
| ATATCTATTGATGTTGTAAA   | 11190 + | TGG | 5662 | 1357 |
| CCATTTATTACGGGTAGGA    | 821 -   | TGG | 1469 | 5111 |
| ATTGGTCGACGTTTGAATAT   | 16411 - | TGG | 3665 | 3122 |
| GCGTTTGATGAAATACTTGA   | 11745 + | GGG | 4729 | 2150 |
| CTAAAGTCATATATACTACG   | 39928 - | GGG | 3992 | 2811 |
| ATTCAACATTCAGTTAAAGA   | 11781 + | AGG | 2363 | 4154 |
| TAGGAGTGAACATATAGCC    | 40022 + | GGG | 1088 | 5270 |
| TCCTCATGACCATTCTTTAA   | 9969 -  | CGG | 5313 | 1425 |
| AGATTTTATTGAACAAGTAA   | 9900 +  | CGG | 4940 | 1718 |
| GTTAAAATTA AAACTATTTTC | 12660 + | AGG | 4010 | 2481 |
| AATAAGCGCCATTCCTACA    | 10138 - | TGG | 3974 | 2484 |
| TTTATCTCTGTAGCAAACG    | 3935 -  | TGG | 4264 | 2193 |
| CTCTATTATCTCTTCGTACA   | 18682 - | AGG | 3420 | 2947 |
| TTGTTATCAAATATTTAAGG   | 1710 -  | TGG | 2891 | 3345 |
| TGTTGTATCTGATTCACACA   | 22667 + | CGG | 3938 | 2305 |

|                       |         |     |      |      |
|-----------------------|---------|-----|------|------|
| AGTATAAAAGAATGTTTATA  | 10613 + | TGG | 3338 | 2789 |
| CTAATACATGTTTGTCATAG  | 5695 -  | TGG | 5577 | 763  |
| TTTAGTTTTTAAAAATTCTT  | 8442 -  | TGG | 2337 | 3634 |
| AACCACAATCCTAAATTAAT  | 40187 - | AGG | 2734 | 3207 |
| ATCTTTAATGCGATGTCAGC  | 24590 + | AGG | 3099 | 2873 |
| TACCCATACCGCGTAACACA  | 17082 - | AGG | 2994 | 2963 |
| TAATTAACTTAGTCATGAAA  | 3569 +  | TGG | 3635 | 2324 |
| AACGCCCTGCTACTAATCAC  | 2629 -  | AGG | 1111 | 4601 |
| AAGAGAACGCAACAAAGAGC  | 11476 + | TGG | 4166 | 1824 |
| CGCAAAAATATTCATGTAA   | 3361 +  | CGG | 1575 | 4107 |
| AATGATTCTGACATTGCATT  | 22286 - | GGG | 3506 | 2358 |
| CATATTCTTCAAAGGCCTTT  | 14775 - | TGG | 3074 | 2686 |
| TTGGTCGTCGAGTTGTAGCT  | 1051 -  | CGG | 1285 | 4235 |
| TTTTTTACCTCAAATTTTAC  | 4075 +  | AGG | 1869 | 3672 |
| GCAAAGAACGTGAAATAGCT  | 9651 +  | AGG | 2787 | 2836 |
| ATAAAAGTAAATGTTGATAC  | 18643 + | TGG | 3233 | 2415 |
| AGAAATGTTAAAAAGTGTAT  | 39712 - | AGG | 3115 | 2501 |
| TTCATTTTAAAAGGTCATAT  | 3400 +  | GGG | 2128 | 3338 |
| GAGTCTAAATTTAAATCGAG  | 19408 + | TGG | 4418 | 1249 |
| AAAATATCTCTTCCTTCTTG  | 869 -   | AGG | 648  | 4648 |
| GTTTACCCATATATTGTTGT  | 21840 + | GGG | 3591 | 1989 |
| GAAATCCTATGCAAGGCAGT  | 331 -   | AGG | 2141 | 3288 |
| ATTTGCAAATCCTAGCATTAA | 4552 +  | CGG | 2703 | 2761 |
| ATTTGAATCATCACATTTAT  | 11324 + | TGG | 4288 | 1306 |
| GATTACTTACGTAATGCGAA  | 676 +   | AGG | 2696 | 2713 |
| TGCCAAGGAAATCCTATGCA  | 338 -   | AGG | 1771 | 3547 |
| TTACGTGCTCTCATTACAGT  | 18512 - | TGG | 3043 | 2337 |
| AGAAACATCAATCACACATT  | 2425 +  | CGG | 1469 | 3750 |
| AAGAGGTATTTAAATATGTT  | 16156 + | TGG | 3851 | 1596 |
| TTTAGTTGTTGATGATGATG  | 21085 - | AGG | 2785 | 2536 |
| AAGATTGAACAAATAGATAA  | 14978 + | AGG | 4152 | 1281 |
| TAACCGTATCGATTAAGATA  | 40130 - | CGG | 3070 | 2249 |
| TTTATATTCACAACTTGCCA  | 353 -   | AGG | 1132 | 3895 |
| GGAAAAAAGGAGCAAACAAA  | 37855 + | TGG | 3566 | 1691 |
| CATATCGTACCAGATTGGCA  | 10188 + | AGG | 3196 | 1996 |
| AACAACAACGAAATATATGC  | 11088 + | GGG | 3400 | 1793 |
| AATCTCCGTTTAGTTAATAC  | 5967 +  | AGG | 1088 | 3839 |
| AAAGCAATTATGAAAAGAGT  | 194 -   | AGG | 4330 | 889  |
| CGTCTATCTGTCTTTCCCTC  | 34085 - | TGG | 1275 | 3608 |
| GGTTTGTAGTTATATAAAT   | 3630 -  | TGG | 1263 | 3579 |
| ATTTAAGGTGGTTATTCTTA  | 1698 -  | TGG | 2349 | 2577 |
| AGCATTGTTGATAACAGAGT  | 8290 +  | AGG | 1375 | 3433 |
| AAACAATAAACTTTTATGG   | 11602 + | AGG | 2999 | 1929 |
| AGTGTATAACCTGCTGGCAC  | 39327 - | TGG | 2603 | 2262 |
| TACACACGATCAATCACAAA  | 32947 + | CGG | 3122 | 1749 |

|                        |         |     |      |      |
|------------------------|---------|-----|------|------|
| CCGATTAAGTGCATAATAGT   | 25138 - | AGG | 3611 | 1275 |
| GTAAGATGACAGCTATGTTG   | 17376 + | AGG | 3138 | 1686 |
| TTTAACCTAATAAAAATACAT  | 38598 - | TGG | 2688 | 2065 |
| TACACACATAAGTTTATTGG   | 234 -   | CGG | 3690 | 1151 |
| ATCATCAACACTATTTCTAA   | 16631 - | TGG | 3914 | 921  |
| AGTTCACTATGAAAACACTACG | 10991 + | CGG | 2333 | 2347 |
| CGATAGAATCGGAAACCCTT   | 34564 - | AGG | 3380 | 1399 |
| GTTTTAAACCCAAAGAATGA   | 6351 -  | CGG | 3600 | 1163 |
| GACCATTATTTGATGCTAAC   | 20142 + | GGG | 2738 | 1924 |
| CAAATACAAGCGTTAATACG   | 35255 + | TGG | 3161 | 1534 |
| AAAGCATAAAAAATGGTATT   | 3048 +  | AGG | 1202 | 3245 |
| AGGAATCATGAAAGACAAGA   | 12358 + | TGG | 2314 | 2235 |
| AATACAAAATCTACGGCACA   | 32585 + | TGG | 3043 | 1549 |
| TTTACTTGACTAGATGATA    | 8229 +  | TGG | 2984 | 1581 |
| ACGTCATCAAATCTTTTAT    | 16181 - | AGG | 2986 | 1574 |
| ACCAACCGAAATGCCATTTT   | 7188 +  | CGG | 2625 | 1869 |
| TTTACGCGCGTTATCTGTCA   | 10047 - | TGG | 2426 | 2041 |
| TTTATCTTTTCGCTGAATAG   | 7668 -  | TGG | 3500 | 1063 |
| TAAATACAACAGGCTCAATA   | 17861 + | AGG | 3439 | 1070 |
| TTTTCTAATTGTTCTCGAGT   | 22997 - | TGG | 2580 | 1843 |
| AATTGGCCACTGCTTTCAA    | 5117 -  | TGG | 3037 | 1416 |
| TATTACCGCAAAGATAATTT   | 2947 +  | AGG | 1855 | 2461 |
| TCTCCCAATCATTAACGT     | 4186 -  | TGG | 2243 | 2075 |
| CCTATTGCAAATGCTAATTG   | 9918 -  | TGG | 4104 | 390  |
| TTGAGTATTGCGAATCAAGT   | 12100 + | AGG | 3557 | 867  |
| ATTTAAAGTCAAGAAGTATG   | 20839 + | GGG | 2854 | 1497 |
| GTTCTGAACTTGTCCTTC     | 17520 - | AGG | 2075 | 2198 |
| GTGAAACACGCTGTACAAAC   | 22371 + | AGG | 3135 | 1228 |
| ACGCAATTTTTCGTACCTTC   | 14720 - | CGG | 3387 | 986  |
| TGCTAAAGTCATATATACTA   | 39930 - | CGG | 2591 | 1677 |
| GAACCACAATTTTCTTTCT    | 6585 -  | AGG | 2804 | 1479 |
| CGATTGTACTIONGCTTGATGT | 36132 - | TGG | 2220 | 1993 |
| ATTAAGTACCTTGTTCTGC    | 19588 - | TGG | 2180 | 1976 |
| ATTCTCATTCAAATCAAAGT   | 15738 - | CGG | 967  | 3063 |
| TTTGCAGTATACGGAAAAAT   | 3917 +  | TGG | 880  | 3094 |
| TTTAAACGACGTATCGATAT   | 30713 + | TGG | 2622 | 1456 |
| TTTTTTGATGTCTATTACCC   | 6033 +  | AGG | 1604 | 2353 |
| TATCGCTATTGCGTTAGATT   | 6829 -  | GGG | 1844 | 2111 |
| ACAAGTACGGTTGTTAATAA   | 1979 +  | CGG | 1247 | 2643 |
| CTGAATTCAATAAATACAAC   | 17851 + | AGG | 2037 | 1929 |
| ATTTAATGATTCTGCAGCTG   | 308 +   | AGG | 1197 | 2683 |
| AGGGTTTTCGAAACTAATTT   | 37660 + | AGG | 2880 | 1157 |
| ATATATAAAGCAACATGGTT   | 10250 + | TGG | 2824 | 1199 |
| GATACAAAGACTTACTTTAT   | 10714 - | AGG | 1794 | 2088 |
| TATTTAATTATGAAAATCAC   | 4626 +  | AGG | 2148 | 1763 |

|                       |         |     |      |      |
|-----------------------|---------|-----|------|------|
| CCATTCGGGTGTTTTTAGT   | 7782 -  | AGG | 1810 | 2050 |
| GTTCCAACTGCAAGCATAG   | 10866 + | AGG | 2090 | 1785 |
| GTTTACCATCATAAAGGAT   | 40369 + | GGG | 2212 | 1674 |
| TATATTTGATTTGTAAGTTC  | 21725 - | AGG | 1983 | 1843 |
| ATCAGAAATTTAAATCAAGT  | 18403 + | GGG | 2922 | 989  |
| AACTAAATCAAATATGAAC   | 8351 +  | TGG | 2653 | 1228 |
| ACTATTTCTAATGGCAAAGT  | 16622 - | TGG | 2422 | 1421 |
| GTGACATGCTTGGGTGAACA  | 39861 - | AGG | 3092 | 794  |
| GATGGACGACAACCTTTTTGT | 27154 + | AGG | 2505 | 1319 |
| AATTAGAAATGTAAATGTAG  | 9415 +  | AGG | 3111 | 750  |
| TCAATACCTTTACCTAAAAT  | 6805 +  | AGG | 2687 | 1125 |
| GAAACGTTGAGGCACCTAT   | 8877 +  | GGG | 2077 | 1651 |
| CCAAATCGTATCAAGTACAT  | 25934 - | TGG | 2239 | 1492 |
| TACGAGTGAACCTAAATATC  | 17454 - | AGG | 2367 | 1368 |
| TTCGTCATTGACATTAACGA  | 3980 +  | AGG | 965  | 2625 |
| CGCTAACATAAAGAACATAT  | 38272 - | TGG | 1867 | 1800 |
| TCCTAAAATCCCTTTAAGCA  | 34242 - | TGG | 2583 | 1140 |
| GAAAAACAATAACAGAAGCT  | 25587 + | TGG | 3060 | 705  |
| TCATTCTGATTGGTTATTTT  | 17669 - | GGG | 1800 | 1827 |
| GTTGATTTGCGTCCACTGTG  | 994 -   | CGG | 1927 | 1685 |
| TAAAAGAATAGCATCATTTG  | 6438 +  | GGG | 876  | 2623 |
| CCTATCATCTCTTTGTTGTT  | 16969 - | AGG | 620  | 2845 |
| TTATCATGATGTTACAAAAG  | 637 -   | AGG | 1050 | 2449 |
| AACTTTGAAGCTTCTAGAGC  | 6577 +  | AGG | 2676 | 981  |
| AATACCATTATTACCGGGT   | 825 -   | AGG | 1055 | 2420 |
| ATTAACAATAAAACTTTTA   | 11599 + | TGG | 1466 | 2049 |
| AAGATATAGAATGCTTTGGT  | 10630 - | AGG | 2385 | 1213 |
| ATTTCTGCTTGTGCATATTC  | 19753 - | AGG | 1812 | 1686 |
| GTATGCTCAGATGTTAAAAG  | 14021 + | AGG | 1867 | 1629 |
| TCTTTTCGATTGATCTAAA   | 17217 - | TGG | 1840 | 1648 |
| TAAGAATGACATTGAAATAG  | 14833 + | AGG | 3316 | 306  |
| CTGGCACATTATGAAGCAGT  | 5661 +  | CGG | 1547 | 1888 |
| AACATTCACGTGATCCGTAC  | 9735 +  | TGG | 2709 | 839  |
| TAAATTTAACGAAACGTTTCG | 8867 +  | AGG | 1420 | 1993 |
| TATGAAAAAGATGATGATAA  | 16832 + | TGG | 2415 | 1091 |
| TCCGATAAAATAACATTGCC  | 19546 - | TGG | 2337 | 1139 |
| CTGTTCTATGAAAGTTGCAA  | 5489 +  | GGG | 1489 | 1895 |
| CTTAATATTCGACGATAGCG  | 8572 -  | GGG | 2057 | 1377 |
| TGGAAATTCAATGAAGATGA  | 4965 +  | AGG | 712  | 2564 |
| AAAAACCAACGTTTAATGAT  | 4197 +  | TGG | 538  | 2718 |
| GTTCAATATAAAACGAAAAA  | 3300 +  | CGG | 3217 | 285  |
| GATTCTTCTAACTTATTAAC  | 17482 - | TGG | 2349 | 1055 |
| TCCTTTCACTTATAATCACT  | 26829 + | TGG | 2318 | 1071 |
| AGATGAAAAAACGACTATAA  | 165 -   | AGG | 944  | 2311 |
| CTTAATGTGTTCATAGATTC  | 37069 - | AGG | 1355 | 1938 |



|                       |         |     |      |      |
|-----------------------|---------|-----|------|------|
| ACATCTGTTTCAATTCGTT   | 23689 - | TGG | 1222 | 2044 |
| GCTAAAGTCATATACTAC    | 39929 - | GGG | 1062 | 2178 |
| AGCTAGTTATTTCTGTAATT  | 9166 -  | TGG | 1432 | 1824 |
| AAGTAGCGCAATGAGTATGT  | 16792 - | AGG | 1574 | 1687 |
| TTTTGATGTCTATTACCCAG  | 6035 +  | GGG | 870  | 2311 |
| CAGTTGTGACGTGGAAGGTT  | 2598 +  | TGG | 348  | 2770 |
| AATTTAAAGTCAAGAAGTAT  | 20838 + | GGG | 2034 | 1227 |
| AATCATCAATAAACTTAAAT  | 15904 - | TGG | 1726 | 1503 |
| AAGTACCGTCGTTATCTTTC  | 5203 -  | TGG | 211  | 2819 |
| ACTACAGTACCGTTTTTACC  | 36838 - | GGG | 1494 | 1646 |
| GGATTACCACTATCTTATAC  | 20177 + | TGG | 2347 | 874  |
| ATAATACTGCTCGTGCAACA  | 32531 + | TGG | 2040 | 1145 |
| TCATCCAAATTGAAAAGCA   | 2103 +  | TGG | 1001 | 2077 |
| CATGACCTGTAATAACAAAG  | 4272 -  | TGG | 975  | 2096 |
| GCATATAATTACTTCGGTAT  | 35948 + | TGG | 1905 | 1255 |
| CTATCTCGTAAGTTCAGCGT  | 11931 - | TGG | 2133 | 1028 |
| AAGAATTATCTTAAGACGTG  | 14305 + | GGG | 2562 | 611  |
| TGCTATGCATGCTGTAAG    | 5932 +  | TGG | 1303 | 1744 |
| TGCTTGTAACGTCGTTAACG  | 20288 - | TGG | 1535 | 1476 |
| AAGATTTTATTAAGCAAGA   | 7445 +  | TGG | 1749 | 1273 |
| GACTCTTATTACAGTCTTGT  | 20536 + | CGG | 1728 | 1291 |
| TGTTACCCAAGCATGTCAC   | 39880 + | TGG | 426  | 2450 |
| GATCTTATACGAAGTAAAGA  | 13617 + | AGG | 2398 | 668  |
| GATTGGGATTACGCACGTTA  | 20243 + | CGG | 2103 | 932  |
| GAAAACCTGTGATTAGTAGC  | 2640 +  | AGG | 61   | 2775 |
| AATTTTCTAGTTGATTCTAC  | 5396 -  | TGG | 1663 | 1297 |
| CCACAAATAGAAATAGAGCT  | 3698 +  | AGG | 908  | 1977 |
| CGGACAAGGCAAAGCATTTCG | 35827 + | CGG | 2123 | 876  |
| GCAAAGATCATTAAACAAAA  | 2276 +  | CGG | 1419 | 1511 |
| TTTGACCAAGCTGTTATCTT  | 19907 + | TGG | 1688 | 1263 |
| CAAACGTCATTGCATAATCA  | 35970 - | GGG | 1093 | 1795 |
| AACAACCCTCCTCATCACAA  | 2575 +  | TGG | 851  | 1995 |
| CTGAGAATTTTATTACATGA  | 12851 + | CGG | 1651 | 1259 |
| ATCCTTGATGATGGTAAAC   | 40350 - | CGG | 1754 | 1151 |
| TGTGGTACATTAACAAATG   | 9694 -  | TGG | 2563 | 406  |
| TTTTATATGAGCAAGAGCTA  | 8794 +  | GGG | 1088 | 1735 |
| TTTGTGTCGTTTCATATTCGT | 38125 - | AGG | 983  | 1823 |
| TCAATTAGTTTGTCCGCTA   | 5991 -  | TGG | 476  | 2258 |
| GCATACACATAAGTTTAT    | 237 -   | TGG | 723  | 2032 |
| GTTTTAGAGAATGTTTCTAC  | 6754 +  | AGG | 1746 | 1086 |
| GTTCAAATAATGATACTGGT  | 20325 - | TGG | 1459 | 1334 |
| TGAACCTAATAAAAGTTATC  | 37605 + | AGG | 1709 | 1089 |
| AAAAGCAGAAGTAGAGGTTTC | 5312 +  | CGG | 195  | 2451 |
| CCAAAATCATTAAATATTGCA | 8029 +  | AGG | 1309 | 1443 |
| TATTGTCATCGAGCTTAAAT  | 15604 - | TGG | 1219 | 1514 |

|                        |         |     |      |      |
|------------------------|---------|-----|------|------|
| TAACCGTATCTTAATCGATA   | 40143 + | CGG | 1792 | 995  |
| AGAAAAACTTGTGTACTAAA   | 93 -    | AGG | 1073 | 1632 |
| TAGATAACAGGCAGGTACTION | 39766 + | CGG | 2174 | 630  |
| TTGACACAACACAAACATCA   | 27197 + | GGG | 1092 | 1603 |
| TACACAAAATACAAAATCTA   | 32578 + | CGG | 1619 | 1126 |
| TTTAAAAGAATAGCATCATT   | 6436 +  | TGG | 1448 | 1273 |
| CAAGATGGAATCAAGATTTT   | 7460 +  | AGG | 1117 | 1568 |
| CAGTTTTAATACCGTATTCG   | 10810 - | TGG | 290  | 2306 |
| CGCTCTTATCAGACGTAGTA   | 20564 - | CGG | 1169 | 1503 |
| TATAAGTAATTTTTTCTTT    | 8609 -  | CGG | 639  | 1979 |
| GTAAGCGTTAGTGGCATT     | 25184 + | TGG | 1430 | 1264 |
| CATATAAATAAGGCTCATA    | 17962 - | AGG | 1856 | 876  |
| AAGAAATCGTTAGCACTAAT   | 20219 + | GGG | 721  | 1868 |
| TTCTTAAGTTGTCTTTCAGT   | 30454 - | GGG | 1622 | 1049 |
| AATTTAAGTGCTAAAGCTAA   | 6970 +  | AGG | 882  | 1712 |
| AATAAATTGTTTTTAGCTAT   | 21163 - | TGG | 1021 | 1577 |
| AACCCTCTATCAACATAGCT   | 390 +   | TGG | 1116 | 1489 |
| CAAGATGGAACAGCAGACGC   | 12373 + | AGG | 1575 | 1068 |
| TCATACTCTAGTAATTCGTC   | 9367 -  | TGG | 1653 | 996  |
| GTCGAACACTTATTTGTATT   | 10435 - | TGG | 1764 | 889  |
| CTTTGTTGGTTTGATGCATT   | 33521 - | CGG | 1407 | 1211 |
| GTATAACGGCAATGACACAG   | 11681 + | AGG | 1982 | 689  |
| TTGCAAATGTGAAATCTATG   | 7839 +  | AGG | 676  | 1866 |
| GTTAAAAGAATGTTAAAGTC   | 6108 -  | AGG | 1405 | 1200 |
| TCGCCGTATGTGTAATGTGC   | 9849 -  | TGG | 2042 | 618  |
| ACGTAATATCAACGGTATGT   | 15707 + | GGG | 1685 | 936  |
| CTATCCGGATATTTATTTTT   | 37527 - | AGG | 1864 | 774  |
| TTTGTCTATCCAGTGCTTGC   | 35592 - | TGG | 1257 | 1320 |
| AATTATTCAATGGTCAATGT   | 37782 - | CGG | 1653 | 948  |
| CTCATCTCTGTAATAATTTG   | 4066 -  | AGG | 46   | 2391 |
| CGATAGTAGACGCAATTAAT   | 31775 + | GGG | 1271 | 1262 |
| GCCAACAAAATAACATTAT    | 16754 - | AGG | 1062 | 1435 |
| GAACTTGTATCAGTACTACT   | 34831 - | AGG | 1400 | 1129 |
| TCCGTTTTATCAGTGCCTAT   | 29215 - | CGG | 739  | 1724 |
| ATGCCTAGTTAATTGATAC    | 13233 + | TGG | 1890 | 677  |
| TTTTGTTCTTCTGATTGCTC   | 19161 - | AGG | 2121 | 468  |
| TGATGAATTAGCTGACATGT   | 12069 + | TGG | 1704 | 840  |
| ACATCAATCACACATTCGGA   | 2429 +  | CGG | 96   | 2290 |
| TCATGTTCCGGTAAATTTATA  | 9457 -  | TGG | 1470 | 1035 |
| TCTAGAGCACCGTTAAAGAA   | 9976 +  | TGG | 1773 | 760  |
| GCCTAAAAATCTATCAACTA   | 19294 - | AGG | 1770 | 761  |
| TCATACCATCTAACTAGCG    | 14868 - | AGG | 1628 | 873  |
| AATTTTTCGTATTCAACTGT   | 22586 - | AGG | 1583 | 911  |
| CAATATAAACGAAAAACGG    | 3303 +  | AGG | 878  | 1542 |
| ACCGCTCTATATTTAACGGC   | 6388 +  | AGG | 992  | 1432 |

|                       |         |     |      |      |
|-----------------------|---------|-----|------|------|
| GGATTGAAATGTGAGAGATG  | 7747 +  | TGG | 1713 | 780  |
| TTCCCTCACACTATTTCTAT  | 20996 + | TGG | 1532 | 933  |
| GCTTTAATTCAGTTGCTTAC  | 25886 + | TGG | 1274 | 1161 |
| GTGCTTTCACAAGTATTTCT  | 25485 + | TGG | 1559 | 883  |
| TATAGTTGGGATCAATGTTG  | 13006 + | AGG | 1109 | 1283 |
| TCATAACTTTCAACGCTACC  | 32832 - | TGG | 1109 | 1270 |
| CGCTATTAATGTTAGTACAA  | 27769 + | AGG | 1626 | 803  |
| ATGTATCAAGATACTGCATA  | 38893 + | CGG | 556  | 1759 |
| CCATTCATGTTGCGTCCGTT  | 33943 - | TGG | 633  | 1689 |
| AAAAAGAAAGTTTTAACTTA  | 927 +   | AGG | 1106 | 1245 |
| ATAACAAAAAAGTAGCCCGA  | 39803 - | AGG | 2228 | 228  |
| TCACGATGTTTTGTAGTGT   | 18080 - | TGG | 1346 | 1021 |
| GAAGTACGACGAAAGTTATT  | 7641 +  | GGG | 1187 | 1155 |
| CCTGTCCAAATTTAAACCGT  | 37312 - | CGG | 1725 | 656  |
| CGACACAAATGATTTAGGGT  | 38155 + | AGG | 1884 | 511  |
| GCATAAAAAATGGTATTAGG  | 3051 +  | AGG | 1571 | 793  |
| AAACAATCAAGAGAAAAACA  | 500 -   | AGG | 1689 | 683  |
| TTTAAATGTAGATAACAGGC  | 39758 + | AGG | 1884 | 505  |
| GCGAGAAAAGTAAGAGTAAT  | 8404 +  | CGG | 1375 | 964  |
| CCAGAAAGGAGATAACGAAA  | 6879 +  | TGG | 1736 | 637  |
| TCAAAGTTTACAGTCGTTG   | 12525 + | AGG | 1529 | 818  |
| TCTTCAACAACCAATGCTC   | 15539 - | GGG | 1296 | 1018 |
| TAAAACCGCTCTATATTTAA  | 6384 +  | CGG | 706  | 1539 |
| AGAAAAACAAGGTATGACTT  | 489 -   | TGG | 785  | 1455 |
| GAATGACGGTATGAATATAT  | 6337 -  | CGG | 1369 | 910  |
| GCAACGTGATGAGCTTATTG  | 11440 + | GGG | 1579 | 711  |
| TTCGACCATGATTTAAGTAA  | 9032 -  | TGG | 1462 | 811  |
| CGCTGATAAAAGTAACTAT   | 16058 + | CGG | 199  | 1950 |
| GTTTCAGAACGAACAAGTT   | 17549 + | AGG | 869  | 1344 |
| TATTAGTAGTACGCCCTTTT  | 7244 -  | CGG | 317  | 1842 |
| AAATTACCTGACATAGATGA  | 17645 + | AGG | 1215 | 1017 |
| GAAAATACAGATCCTAAAGC  | 15585 + | AGG | 1166 | 1052 |
| TCATACTACGCCAAATATT   | 35320 - | AGG | 1459 | 784  |
| CCGAAAGCGTTTAGAGATGC  | 31061 + | AGG | 1399 | 832  |
| CTAATCGTTACATTCACAAT  | 26638 - | AGG | 1452 | 766  |
| TTATTTCAAGTGTACTTTTTT | 13048 - | GGG | 1554 | 671  |
| AATAACAATACTAATAATGA  | 7312 +  | TGG | 1207 | 984  |
| GGTAAACATCACGGAATGTT  | 22440 + | TGG | 1151 | 1029 |
| ACATTTTACAACACTAACTC  | 27367 + | AGG | 1618 | 603  |
| CGTTCATAGAACATACCTGA  | 15671 - | TGG | 624  | 1491 |
| TAATTAAGGGGTGATTTTTA  | 37404 + | TGG | 718  | 1405 |
| CCAAAAAAGCTGTTGTATCA  | 40303 - | AGG | 380  | 1697 |
| TAGCGTCCATTACACCTAGT  | 11361 - | TGG | 1430 | 748  |
| TTATCGAGTGTATAACCTGC  | 39333 - | TGG | 1510 | 674  |
| TAATTATTTCAACAAATGAA  | 6470 +  | TGG | 80   | 1962 |

|                      |         |     |      |      |
|----------------------|---------|-----|------|------|
| ATAACTAGCTCAAAGCGTTA | 9195 +  | TGG | 1156 | 969  |
| ACTCACGATAAGTCATGAAT | 18559 - | GGG | 1819 | 358  |
| AGATGAGAATGACTTAGATA | 3480 +  | TGG | 1258 | 861  |
| TATTACTTATACCGAGAAGA | 8637 +  | TGG | 1429 | 704  |
| ATTTATTAACCTTACAAAA  | 5009 +  | AGG | 384  | 1628 |
| TGCCAACGCTTAAGTTGTTA | 38624 - | GGG | 736  | 1309 |
| ACAACTTCACGACGCAATAA | 15028 + | CGG | 1378 | 726  |
| AAAATCCGGAGCTATCACAA | 10380 + | GGG | 986  | 1071 |
| GAAACAATAAGTAAACTTTC | 6075 -  | TGG | 1319 | 763  |
| ACTATGAAGGGGATATCAAT | 10471 - | TGG | 522  | 1481 |
| GTTTGATGTTCCGAGTAAAG | 18026 + | AGG | 1233 | 835  |
| GTTGATTCTTCTATGCTATC | 37542 - | CGG | 1258 | 806  |
| TGGAACTGGTGCAAGAATAT | 15512 + | TGG | 1133 | 918  |
| ATCTTTCAACAACCAATGCT | 15540 - | CGG | 1268 | 789  |
| TTTGTAGCAGACTACCACC  | 21548 - | AGG | 1109 | 918  |
| TAATTTATACGTAGACCTTT | 20017 + | CGG | 1141 | 875  |
| GTTCCGTTTCTACTGCTCC  | 38745 - | AGG | 896  | 1091 |
| TTCATCCGTTTAAATCAATA | 20938 + | AGG | 1198 | 813  |
| TTACAACAAAATCGAACAT  | 1802 +  | CGG | 1407 | 616  |
| CTAATAAAAATGATATGGAT | 39203 + | TGG | 1483 | 536  |
| GAAGTAAAATCGAATACACC | 31385 + | GGG | 850  | 1105 |
| AGCAAACGCAAAAACAAGAT | 15112 + | TGG | 1215 | 772  |
| GTCACCTGATAACTTTTATT | 37593 - | AGG | 1669 | 361  |
| AGCTAGGCAACGACGTAAAG | 9667 +  | AGG | 1220 | 764  |
| CCTGCTTCACCTTTTGCACC | 36793 - | AGG | 650  | 1277 |
| TCATTTGGTCAAACTGGAA  | 38512 + | CGG | 1608 | 410  |
| TTCTTTCGCCATTTCTTCAA | 19468 - | TGG | 1360 | 632  |
| TGAACAAAGGTTATATAGTT | 12993 + | GGG | 829  | 1109 |
| GACACCAATTTCTTCAGAAA | 756 -   | GGG | 508  | 1398 |
| ATGGAATCAAGATTTTAGGT | 7464 +  | TGG | 742  | 1184 |
| CTATGCTTGCAGTTTGGAAC | 10847 - | GGG | 1331 | 648  |
| GGCAACGCAGATTGTTTGAG | 2310 +  | TGG | 588  | 1310 |
| TATATTTAAATAACCTCTAT | 27568 - | AGG | 1203 | 722  |
| TATAACGGCAATGACACAGA | 11682 + | GGG | 1256 | 669  |
| AACTATCATTAAAAGTTAAA | 22519 + | TGG | 1429 | 501  |
| GTTTTCCGAAAATGGCATT  | 7177 -  | CGG | 1545 | 393  |
| TTATCTGCATTAAAGCGTAA | 17417 + | AGG | 1069 | 814  |
| AAATAAATACCATTTATTAC | 830 -   | CGG | 353  | 1454 |
| CTGGATAGACAAATGTCTAG | 35618 + | GGG | 971  | 895  |
| ACGCCAAAAGTAACAGGTAA | 2471 +  | AGG | 117  | 1661 |
| CATATCTCCTCCTATTCACT | 20425 - | TGG | 388  | 1415 |
| TGAAGTACGACGAAAGTTAT | 7640 +  | TGG | 363  | 1437 |
| TAAAAGAATAGCATCATTT  | 6437 +  | GGG | 569  | 1251 |
| GAGTGATGTCTGTTGTTACC | 30829 - | AGG | 1062 | 802  |
| TGCGTCTGCGTCAATTGCA  | 21646 - | GGG | 1300 | 587  |

|                      |         |     |      |      |
|----------------------|---------|-----|------|------|
| CTTATCAAATACCGTGTCTT | 10514 - | TGG | 373  | 1421 |
| ATTGATCATATAGTTGTAAT | 34988 + | GGG | 862  | 979  |
| AAAAAGCTGAAGAAAATAAC | 5074 +  | GGG | 350  | 1441 |
| GTTTTTTTGGGGCAAAAAAA | 40235 + | GGG | 910  | 934  |
| ATATTTGGCAATGTGTTCGC | 24980 + | TGG | 1064 | 789  |
| GCTTTTTATTATGCACTTTT | 18877 + | CGG | 1028 | 820  |
| TTTGATTACAATCCATTGTT | 16958 + | TGG | 957  | 883  |
| TAGAAATAGTGTTGATGATG | 16651 + | AGG | 984  | 858  |
| ATGATGATGTGTATGTTACA | 17827 + | TGG | 987  | 854  |
| GAGATTTCCAAAGCAACGTA | 23652 + | AGG | 979  | 860  |
| AAAACATCCAGTGACATGCT | 39871 - | TGG | 855  | 967  |
| GTAGTTAAACATATGAATGA | 7048 +  | TGG | 1105 | 740  |
| TTTTCTTTTGTGCTGTCAT  | 19663 - | TGG | 873  | 948  |
| CAGCCATATTTTGCTTTAAT | 32000 - | TGG | 785  | 1003 |
| ATTTTTAAAACATTCAGGCA | 31824 + | AGG | 1410 | 437  |
| CTCCGCCAAGATGACGATT  | 5883 -  | AGG | 1231 | 597  |
| TCTTCAATATCGTTGATAG  | 36590 + | TGG | 1562 | 298  |
| GGCGAATGGTACACAACATA | 21615 + | TGG | 459  | 1293 |
| CACAAATAGAAATAGAGCTA | 3699 +  | GGG | 891  | 898  |
| AATTTAAGTTTATTGATGAT | 15922 + | TGG | 1243 | 579  |
| ATTCATTTTAAAAGGTCATA | 3399 +  | TGG | 1288 | 532  |
| GACGTTAATCTGGAAAGATG | 10687 + | GGG | 1450 | 372  |
| AGTTATTCAAAAATCACGAA | 1154 +  | AGG | 910  | 854  |
| TTATGTTATAGCTAGCCTTC | 39804 + | GGG | 790  | 959  |
| ACACTGCTAACAGCTGCAAT | 25342 - | CGG | 1200 | 565  |
| CAGGTCGTTGATAATACTCT | 20788 - | AGG | 1085 | 668  |
| TTGGAGCACTGTTACAAGT  | 26100 + | TGG | 987  | 754  |
| CATCCATTAGCACAATTGAT | 28409 + | AGG | 1493 | 287  |
| TATGTGTTTTCTGGTGTTGG | 2808 -  | TGG | 124  | 1510 |
| TATGCACATACCAATGTTGA | 8130 +  | TGG | 720  | 965  |
| ATTAATATAGATAATTATCG | 34463 + | GGG | 1229 | 493  |
| AATCAAAAAATACAACCAAC | 7597 +  | TGG | 686  | 980  |
| ATTTCCCTTGATAGCTC    | 10369 - | CGG | 939  | 751  |
| ATTAAGGCTTCAACACCATC | 15672 + | AGG | 1031 | 667  |
| CGTACTTAACTTTTGCCATA | 21277 - | TGG | 281  | 1343 |
| AAAAGAAGTAACCAAAGACA | 10519 + | CGG | 1218 | 493  |
| ATTGAATTGCTATCATATTC | 13883 - | CGG | 913  | 766  |
| CAGAATGAACTATGAAACAG | 11353 + | GGG | 1102 | 580  |
| AGTCAAAGCTAAAGGGCATA | 8100 +  | CGG | 905  | 745  |
| AAAAGAAATCGATGTTAAAT | 36631 + | TGG | 998  | 658  |
| AGCTTTTACTAAACAACAAG | 37273 + | CGG | 1137 | 528  |
| GAATGTTTTAAAAATTCATT | 31800 - | CGG | 1410 | 272  |
| TCGGTTGATTCTATATCTAA | 6310 +  | CGG | 401  | 1180 |
| TGAACGACACAAATGATTTA | 38151 + | GGG | 686  | 917  |
| TCCACTAAAAGCAGAAGTAG | 5306 +  | AGG | 693  | 909  |

|                       |         |     |      |      |
|-----------------------|---------|-----|------|------|
| TCATCAACACCATCTTGTCC  | 32421 - | AGG | 1094 | 544  |
| AAAATTATTACAAACAGAAT  | 5429 +  | TGG | 1173 | 468  |
| GACAAAGAAATGACGAAAGC  | 23187 + | AGG | 758  | 838  |
| GGAACAACGGTTACTGACGA  | 4004 +  | AGG | 117  | 1414 |
| CATAGAGGTCGAAAAAGTGG  | 10881 + | AGG | 1126 | 503  |
| TAGTACCAAAGATAACAGCT  | 19896 - | TGG | 1175 | 458  |
| TTCCCTAACAACTTAAGCGT  | 38638 + | TGG | 1257 | 381  |
| GTGACATACAACATCCCTGA  | 37734 - | AGG | 1202 | 429  |
| AACAGAATGAACTATGAAAC  | 11351 + | AGG | 1266 | 371  |
| AGTTTAATTGATACTGGAGA  | 13239 + | TGG | 1190 | 439  |
| GATGGTGAAAGAGTTAAATT  | 11570 + | TGG | 1389 | 254  |
| CGTGGATAAAAGTTGATGAG  | 5812 +  | AGG | 1305 | 328  |
| TACGATTAAGCAGATGAAC   | 15776 + | TGG | 1244 | 377  |
| ACATTTAGTAAATCATTACG  | 39108 - | AGG | 858  | 712  |
| TACGGTGCATATAATTA     | 35942 + | CGG | 835  | 730  |
| ATTCACATTCCAGCAAGCAC  | 35599 + | TGG | 738  | 813  |
| GCAACGTTGCCGAAACCACA  | 13941 + | AGG | 595  | 940  |
| AGCGTTTGATGAAATACTTG  | 11744 + | AGG | 1373 | 236  |
| GGCAAAGATGAAAAGTCAC   | 33878 + | AGG | 993  | 564  |
| GAAACAATCTTTATAAACGC  | 1308 +  | AGG | 317  | 1174 |
| AAGCAAGAAAAGTTTGTGCT  | 14594 + | AGG | 806  | 731  |
| CTGAGAATTTTTTCAGCTTTT | 22846 - | CGG | 1153 | 406  |
| ACTAACAAAACAAATACTGA  | 33696 + | GGG | 1289 | 280  |
| TGCAGTAATGCAATCATTTT  | 30100 + | GGG | 708  | 792  |
| TAAAAGGTATCTACTTCACA  | 36195 + | AGG | 1077 | 453  |
| ATGAATTGATAAAAAAGAAC  | 9498 +  | GGG | 272  | 1174 |
| GTTAGAAAAACGCGACGCAG  | 19224 + | AGG | 940  | 571  |
| CTAAATCAATGGCTCAACGA  | 23769 + | TGG | 1204 | 330  |
| TTTATAGGCTCTCCGTTTGT  | 16166 - | AGG | 749  | 736  |
| TTTAGTTATAGTAACTTTGT  | 33295 - | TGG | 955  | 550  |
| GAAACACTTTCTTCATCTAC  | 37945 - | TGG | 953  | 546  |
| CTGAATGGGTTTCTAACATT  | 26193 + | TGG | 240  | 1180 |
| CTTTTATATGAGCAAGAGCT  | 8793 +  | AGG | 351  | 1076 |
| CTTTTGCACCAGGTTGTCC   | 36784 - | CGG | 492  | 942  |
| TTAATACGTCCATCAACAAG  | 28432 - | CGG | 813  | 652  |
| GCGATCAGTTAAAACTACA   | 24537 + | TGG | 518  | 912  |
| TTGGTATCAAATCTAAGCT   | 4889 -  | AGG | 438  | 973  |
| TGATTACGAATTAGACGAAA  | 17596 + | TGG | 822  | 607  |
| TATGAATGAACATGAATTAA  | 13196 + | GGG | 886  | 549  |
| ATACTTGATAAGTCTACTAT  | 27938 + | TGG | 1156 | 302  |
| TACTCATCGTTTGAATCGTC  | 32541 - | TGG | 872  | 558  |
| AGCAATTCAATTGCACAGTA  | 13911 + | TGG | 356  | 1022 |
| AGATAGAGTGTTTGACTTGT  | 10032 + | GGG | 926  | 507  |
| CGAGTGTGGGACGAATATAC  | 10926 + | AGG | 294  | 1076 |
| AGAAAAACAAAGATTTGTTT  | 6142 -  | CGG | 1037 | 405  |

|                       |         |     |      |      |
|-----------------------|---------|-----|------|------|
| TGGGAGAAATATAAGCGAAA  | 18597 + | AGG | 1287 | 177  |
| GTATCTGTTTTAATATACGT  | 12767 - | TGG | 869  | 552  |
| TGATGCCGAAATATCGAGTG  | 10912 + | TGG | 1062 | 376  |
| ACAACATTCAAAGATTCAAC  | 12466 + | AGG | 896  | 521  |
| ATTTGCTATCCTTGAATTGA  | 461 +   | TGG | 610  | 778  |
| AATACTCCACTAATGTAATC  | 20876 - | AGG | 938  | 473  |
| AGCACAAACTTTTCTTGCTT  | 14575 - | CGG | 980  | 432  |
| TTTGAAATGTACGAGATGGA  | 10556 + | AGG | 1061 | 353  |
| AAAACCCTTTCTGAAGAAAT  | 768 +   | TGG | 74   | 1243 |
| ATACAAAAAAGAGCTGAAAA  | 7129 +  | CGG | 503  | 852  |
| CACTCCATTTCTTGAACATT  | 9759 -  | TGG | 324  | 1011 |
| TGATATTTAGAGGTGGCACA  | 8834 +  | TGG | 307  | 1020 |
| TTGATTTTGTCCAATAACTC  | 36925 - | AGG | 1013 | 382  |
| GCGATCAGTCTGATTTGATG  | 13783 + | AGG | 1149 | 255  |
| CGAAACGTTTCGAGGCACCTA | 8876 +  | TGG | 260  | 1038 |
| GTCGAAGATTATTTTATCTC  | 27535 - | CGG | 1098 | 281  |
| GAAATCCATACCAACCATCT  | 38234 - | GGG | 749  | 592  |
| ACAATAGAAAATGTACGTAG  | 37630 + | CGG | 885  | 469  |
| CAACGATATTTGATATTTAG  | 8824 +  | AGG | 34   | 1234 |
| CGTCCACGCTTTCGTAATAC  | 8907 +  | AGG | 306  | 984  |
| TCCTAAGTCGTCCTGACAAT  | 7007 +  | TGG | 179  | 1097 |
| AAAGGAGAACAAGGCGCACC  | 36836 + | CGG | 1107 | 259  |
| GGAAGAAGCGAGTATCAATA  | 3735 +  | TGG | 1148 | 214  |
| GACAAGTTTCAGAACGAACA  | 17544 + | AGG | 380  | 900  |
| GCCATAAAATGAGTATCCAA  | 23593 - | AGG | 931  | 401  |
| ATTCATGACTTATCGTGAGT  | 18578 + | GGG | 906  | 423  |
| AAACAACAACGAAATATATG  | 11087 + | CGG | 1020 | 319  |
| ACTGCAACTACTGCTAATAT  | 25492 - | TGG | 998  | 337  |
| TTAACCAAGCAATAGATGAA  | 3515 +  | TGG | 451  | 829  |
| TTAAATATAACATTGAATCC  | 22901 - | TGG | 524  | 750  |
| ATAATAAAATTATACCAGAA  | 6865 +  | AGG | 618  | 663  |
| ATATGAATGAACATGAATTA  | 13195 + | AGG | 1005 | 299  |
| CGTTTAAATCAATAAGGTAG  | 20944 + | AGG | 385  | 857  |
| GTAATTAATCCGTAAGCCAT  | 29611 - | TGG | 522  | 733  |
| CCTAGCTCTATTTCTATTTG  | 3682 -  | TGG | 26   | 1170 |
| ATTGCAAATGCTAATTGTGG  | 9915 -  | TGG | 889  | 389  |
| AATGACATTTCAAATGATTC  | 22457 - | TGG | 985  | 301  |
| ACTTGTTCTTTATGATAATA  | 16121 + | TGG | 760  | 499  |
| ACTAAGCAAGATGTAGTATT  | 28685 + | AGG | 681  | 566  |
| CAACCTACTCATGTCGAAAA  | 7726 +  | AGG | 256  | 948  |
| ATTAATAACCTAGTAAGGTT  | 6264 -  | AGG | 342  | 869  |
| GAAGAAAAAGAAAAGTGAAA  | 9068 +  | TGG | 85   | 1097 |
| CTTGATTAAGCAAGGTATAC  | 35377 + | CGG | 512  | 711  |
| TGTACGTCTAACGGCTTACC  | 12027 - | TGG | 74   | 1105 |
| GATGAACGCTCAGATATTCA  | 35012 + | AGG | 672  | 559  |

|                      |         |     |     |      |
|----------------------|---------|-----|-----|------|
| CTCTAAGAGATATCTGTATC | 10109 + | AGG | 286 | 897  |
| CATTCATGACTTATCGTGAG | 18577 + | TGG | 482 | 720  |
| AAGAGGTTGAACTACGTAAG | 9684 +  | AGG | 285 | 895  |
| TATGTTTGGCACCTACAAA  | 16170 + | CGG | 234 | 941  |
| CGGATTGTTCTATTTGTTCA | 11626 - | CGG | 610 | 589  |
| AAGTTTATAACGGCTCAGC  | 4683 +  | AGG | 34  | 1106 |
| AATTCTTTGAATATTATCTG | 12222 - | TGG | 533 | 651  |
| GGAATATATATAAAGCAACA | 10245 + | TGG | 719 | 475  |
| GGCAATACATGCAATCAGTT | 25971 + | TGG | 937 | 278  |
| GCGTCACCTTCATCTATGTC | 17635 - | AGG | 472 | 689  |
| ATGGAAAGAGAAAAATCTTG | 19122 + | AGG | 343 | 798  |
| ACTAAAATGTGGCAAATTGA | 36893 + | TGG | 939 | 260  |
| CCTTATTAACGCAAGGGTG  | 2350 +  | TGG | 22  | 1082 |
| TTATATTGGGTTAAATCACA | 38947 + | GGG | 813 | 363  |
| TAGAAATGTAAATGTAGAGG | 9418 +  | TGG | 899 | 283  |
| ATCTCTTAGAGCCGAAAAAT | 10081 - | TGG | 968 | 216  |
| TAATAGAACTATCAAGTAAA | 556 -   | AGG | 993 | 193  |
| ACAGTATTAGACGCATGTAA | 9138 +  | TGG | 408 | 715  |
| ATTCAGGGAGCGAGATGCA  | 8432 +  | TGG | 605 | 535  |
| TGCCTTGCATAGGATTCCT  | 352 +   | TGG | 375 | 741  |
| AAGCGTTAATACGTGGTGTT | 35262 + | TGG | 103 | 983  |
| GCTAAATGAAGATAGTTCTT | 27802 + | TGG | 588 | 541  |
| ACCACTAECTTACCTAAGAT | 24953 + | TGG | 594 | 525  |
| CAACTAATTCAAGAATTACA | 39452 + | GGG | 768 | 364  |
| TGTGAAGCATAAGCAATTTT | 26970 - | AGG | 279 | 803  |
| TGATATTGATGAGTATATCG | 17705 + | AGG | 662 | 456  |
| ACTCTTTTTGCAACCATTCC | 9511 -  | AGG | 409 | 677  |
| TTTTTGATGTCTATTACCCA | 6034 +  | GGG | 672 | 439  |
| TAAATGGAACAAGTGATATT | 24174 + | TGG | 673 | 438  |
| TGGATTTAACTAGAATAACT | 25431 + | GGG | 432 | 655  |
| TCTATTATAAGGAAAACCTT | 588 +   | CGG | 453 | 633  |
| TTGTTGAATTACCTTTAACA | 32234 - | AGG | 754 | 361  |
| ACGTAACGCTACAAAGTCTA | 28520 - | AGG | 379 | 695  |
| TAAAGCTCAATCATTGCGTG | 18221 + | TGG | 66  | 976  |
| GCCAATTGTCAGGACGACTT | 6992 -  | AGG | 893 | 219  |
| CGAAAGATAGCAGACGAAGA | 15219 + | AGG | 410 | 648  |
| TGCTCATACTTTGCGTTATC | 35380 - | CGG | 696 | 385  |
| GTCGTCGAGTTGTAGCTCGG | 1048 -  | CGG | 23  | 990  |
| AGTAATCGGAGACGATTTCA | 8418 +  | GGG | 324 | 716  |
| AAAGTTTACTTATTGTTTCT | 6095 +  | AGG | 515 | 541  |
| TTATTTCTCCAGTTCTATAT | 30321 - | TGG | 554 | 505  |
| TTAGTGAAAACAACTTTCT  | 33455 - | AGG | 592 | 470  |
| AGATGGTCCTACTACTATTG | 34667 - | CGG | 798 | 284  |
| ACTACAGCATGGTCAATTGC | 3165 +  | GGG | 207 | 815  |
| TAGAAGAATCAACAGCAAAA | 37568 + | TGG | 705 | 363  |



|                       |         |     |     |     |
|-----------------------|---------|-----|-----|-----|
| TTCTATAAATTTGCAGTATA  | 3908 +  | CGG | 20  | 979 |
| TATTCGATAATTTCTTTATA  | 7356 -  | GGG | 873 | 207 |
| AACACGAGCACAAACGAGCT  | 35680 + | CGG | 171 | 837 |
| TAAAACCTTTCGTTATACTCT | 28014 - | TGG | 337 | 685 |
| ACAAGTTTACATTCAATGAC  | 29648 + | AGG | 671 | 383 |
| AACTCTTCTTTAAATTTAAT  | 33428 - | AGG | 705 | 346 |
| GAGTCAATTGTTAATATGAT  | 13836 + | AGG | 829 | 231 |
| CTTAAATACTTAGCGATATT  | 38802 - | AGG | 517 | 508 |
| TTCAGTGATTTCTTAAATGC  | 26321 + | CGG | 703 | 340 |
| CTAACAAAACAATACTGAG   | 33697 + | GGG | 456 | 561 |
| CAGATGAATAACGATAGAAT  | 34575 - | CGG | 668 | 369 |
| GACGGTATGAGTGATGCACT  | 26282 + | TGG | 422 | 591 |
| AAAAAAATTATGCTTGTAGC  | 38722 + | CGG | 691 | 345 |
| CTAATTGTTCTCGAGTTGGT  | 22993 - | GGG | 494 | 519 |
| TATTAATAAAAAATGATA    | 39198 + | TGG | 670 | 359 |
| GCTGAAAACGGTGTGTTTAA  | 7141 +  | AGG | 544 | 467 |
| GGAGAAGAAAGCAAGTGCAT  | 11497 + | GGG | 743 | 287 |
| TATCTGTCGTTAAATATATT  | 30373 - | CGG | 695 | 330 |
| AACAATACGCCGTAAAGACA  | 29368 + | CGG | 512 | 492 |
| CAACGACTCTAAAACGTATA  | 37030 + | CGG | 466 | 531 |
| ACGGAATACTAGAAGATGTT  | 20704 + | AGG | 655 | 357 |
| CGTTCAATAAATGTGAAAGG  | 14452 - | AGG | 896 | 138 |
| ACTGTTGCATCTCTTAAAGA  | 7905 -  | CGG | 543 | 456 |
| TGAAAGAGTTAAATTTGGAA  | 11575 + | TGG | 361 | 606 |
| TGGTTTATGTTAATTAATCA  | 15132 + | CGG | 535 | 443 |
| TTGGTAAGTGGAACCTTATCC | 33094 + | AGG | 563 | 417 |
| ATACGTAATTGTTGTGTTGT  | 39466 - | TGG | 60  | 867 |
| GATCAGAATTTTAAATCAAG  | 18402 + | TGG | 615 | 366 |
| TCAATCTTAGCTTTTTCTTC  | 13094 - | AGG | 520 | 451 |
| TTACAGGAGATGAGAGAAAA  | 4091 +  | CGG | 13  | 907 |
| TATCTGCATTAAAGCGTAAA  | 17418 + | GGG | 362 | 588 |
| ATGAAAATATAAGGGAGTGT  | 12626 + | GGG | 532 | 433 |
| AAGCAACGTGATGAGCTTAT  | 11438 + | TGG | 259 | 673 |
| TTTCAATTAATAACCTAGTA  | 6269 -  | AGG | 274 | 658 |
| ACAGAATGAACTATGAAACA  | 11352 + | GGG | 726 | 249 |
| CAACTGACAGCTAGATATTT  | 23282 + | AGG | 492 | 459 |
| TTTACAACGCGCTAAATCAA  | 23758 + | TGG | 386 | 554 |
| GCCAGTAATTGTTGAGTCAT  | 34865 - | TGG | 492 | 458 |
| TATTGAAGAAAGGTTATAAC  | 14104 + | AGG | 388 | 549 |
| TTTACCTTAATATCTTCTGC  | 20457 - | AGG | 431 | 509 |
| TACTCATCGTCATTTAGATG  | 18365 + | GGG | 34  | 864 |
| CAATTTGCGGATATGGTGCT  | 16698 + | AGG | 142 | 766 |
| AAATGGTTTGACAATTCATT  | 38215 + | AGG | 559 | 389 |
| AACTTCAATTGCAGAACAAA  | 29258 - | AGG | 585 | 364 |
| TCCTTAGTTGATAGATTTTT  | 19309 + | AGG | 576 | 372 |

|                         |         |     |     |     |
|-------------------------|---------|-----|-----|-----|
| AGAGATATAGAACTTCACTG    | 5385 +  | GGG | 381 | 545 |
| ATAAATTCGGAACAACGAGC    | 32705 + | TGG | 602 | 345 |
| GTTTTCCCGTCAAAGTATGG    | 38437 + | TGG | 471 | 457 |
| CTAAAAATTGATGTGCAGAC    | 31425 - | GGG | 177 | 720 |
| TAAACCTGAACGATTAAGGA    | 16256 + | GGG | 826 | 134 |
| ATTAAGTGGTACGTAGACAT    | 33804 + | GGG | 509 | 420 |
| ATATGACGATGACGTTAATC    | 10677 + | TGG | 441 | 480 |
| AATGATGGAAGTATATTGTC    | 7327 +  | GGG | 688 | 255 |
| ACAAGAGTGCCGGATTTACC    | 32830 + | AGG | 642 | 296 |
| GCCAATGACTCAACAATTAC    | 34880 + | TGG | 583 | 349 |
| CAAGTATCGATGACTGATTC    | 30923 + | AGG | 629 | 307 |
| TGGAATGAACTTAACTTA      | 17323 + | TGG | 269 | 630 |
| TTAATAGGACGAGGTATAGA    | 15867 + | TGG | 626 | 301 |
| TGAAATCCATACCAACCATC    | 38235 - | TGG | 812 | 128 |
| GCATCTGCAAATACAATTTT    | 2197 -  | TGG | 73  | 793 |
| AGCCAATCACGCCATTCAGC    | 23323 - | AGG | 74  | 790 |
| CTGTCTATAGAAGTACTTAC    | 26569 - | AGG | 642 | 276 |
| ACAACATCGTCGATAATAAG    | 36439 - | GGG | 363 | 523 |
| AAGAATGACATTGAAATAGA    | 14834 + | GGG | 739 | 178 |
| CTTATCTGAAACGACGTTAA    | 35308 + | AGG | 473 | 416 |
| CGACCTCTATGCTTGACGTT    | 10853 - | TGG | 544 | 350 |
| AAAGCAATACGTGATGATGT    | 18192 + | CGG | 575 | 320 |
| AAAAATACAACCAACTGGCA    | 7602 +  | CGG | 34  | 807 |
| ATGAGAGCACGTAAAGACGA    | 18537 + | TGG | 321 | 547 |
| GGCAATGTGTTTCGCTGGTAT   | 24986 + | TGG | 493 | 391 |
| GAAGCCTTAAACGCACCTTA    | 9572 +  | TGG | 609 | 286 |
| ACTTATACATCAAGCAAATC    | 32482 + | TGG | 635 | 259 |
| TTATTAGCTGACTTACAAGA    | 22218 + | AGG | 697 | 201 |
| GTTGGTTCAGTCGTGTTGCT    | 26118 + | TGG | 790 | 115 |
| TAAACTACTACGACTTAAGC    | 21268 + | AGG | 486 | 388 |
| ATACTAAACCTGAACGATTA    | 16252 + | AGG | 590 | 282 |
| AATCCCTCAATAACGCCACC    | 33096 - | TGG | 368 | 478 |
| TTAATTTTAAATGTTGTAAT    | 22772 - | TGG | 712 | 165 |
| TTACTTGTACTIONAGATGATAT | 8230 +  | GGG | 481 | 373 |
| GAAAAAGAAGATTTTGAAAC    | 16454 + | TGG | 526 | 331 |
| AAGTTGAAGATGTTGTTGTG    | 13978 + | AGG | 439 | 408 |
| TAAAAAGCGTTTTAGCGCTT    | 1903 +  | GGG | 102 | 707 |
| AATAGTTGGACAGTTCTCC     | 34751 + | GGG | 360 | 472 |
| TGGTAAGCCTATAGGTGGTT    | 39276 + | TGG | 208 | 608 |
| TTACTATAACTAAAATTATG    | 33320 + | GGG | 560 | 290 |
| GGTAAAATGGCAGCAATTTG    | 16685 + | CGG | 330 | 497 |
| ATTA AAAAGATTTTATGTTTG  | 11219 + | AGG | 148 | 661 |
| ATAATCCAACATCTCAAGAA    | 38028 + | GGG | 521 | 322 |
| TATTTCAACAAATGAATGGT    | 6474 +  | GGG | 359 | 468 |
| CACAAAGTAGTCAGCGCGGT    | 26390 + | AGG | 258 | 557 |

|                      |         |     |     |     |
|----------------------|---------|-----|-----|-----|
| ATGTAGTTGAATTCTTTGAA | 11981 + | TGG | 813 | 55  |
| TCGTAATTATCTATTTCTAT | 21986 - | AGG | 494 | 342 |
| GAATACTTAAACCAATTTTT | 10086 + | CGG | 518 | 319 |
| AACGCTTAAACCAACTGAAT | 20431 + | AGG | 533 | 305 |
| ATACGTCCATCAACAAGCGG | 28429 - | TGG | 525 | 306 |
| GCGTCTTTAAAAATAAAAAA | 69 +    | GGG | 451 | 370 |
| GAGAATTACAAGGAAATCAT | 23226 + | GGG | 501 | 323 |
| CGGTAATCTTCGCGCAAC   | 24268 + | AGG | 335 | 470 |
| CCTGCATCTCTAAACGCTTT | 31045 - | CGG | 311 | 486 |
| TGAATATGCACAAGCAGAAA | 19771 + | TGG | 539 | 268 |
| GTAGTTGAATATAACGTTAC | 26854 + | AGG | 663 | 154 |
| TTCAACACCAGTAGCAACGA | 5229 -  | CGG | 708 | 113 |
| TGCTATCAAATGCTTAATTT | 35741 + | AGG | 411 | 377 |
| AGCCTGTAACACTTACATAA | 34773 - | GGG | 158 | 604 |
| GATACTTTGCCGTTATTACA | 23067 + | AGG | 406 | 380 |
| CAGGTACCGACCATTTTTCA | 27287 - | GGG | 619 | 180 |
| TAATATCACTTAGATATGCT | 30960 - | GGG | 424 | 356 |
| ATGGCGTTGCGCAACCTGGT | 38549 + | TGG | 322 | 448 |
| TCACATCATTTGGTCAAAC  | 38507 + | TGG | 645 | 153 |
| ACGACAATATCCAACTTTTG | 38400 - | CGG | 195 | 557 |
| ACCTCTACTTCTGCTTTTAG | 5291 -  | TGG | 555 | 230 |
| GCAACTCCAACATACACGCC | 19544 + | AGG | 260 | 496 |
| ACTTACTTAGCAAAGGTGT  | 19706 + | AGG | 143 | 598 |
| AGGAGGCAACCAATGGCTTA | 29618 + | CGG | 406 | 359 |
| ATAACCAAATGTTCAAGAAA | 9771 +  | TGG | 447 | 313 |
| AAGAACTGGAAGAAGAAACC | 12025 + | AGG | 220 | 513 |
| GATTTAGCTGAAATAGTACG | 22260 + | AGG | 510 | 251 |
| CTTTTGCATAGCGTATGCT  | 8060 -  | AGG | 184 | 545 |
| GTGTATATTTGCCAATTGTC | 7002 -  | AGG | 524 | 232 |
| TTGAAAATGATTTAGTTAGT | 31919 + | GGG | 707 | 66  |
| CTTTCTTCATCTACTGGTAT | 37939 - | CGG | 327 | 409 |
| AACGATTCAAAGGCGCTCAC | 8770 +  | GGG | 427 | 313 |
| TAAGTGACATCGAACCAGTA | 9733 -  | CGG | 449 | 293 |
| AAATGAAGCTGATTTAGATA | 18759 + | TGG | 666 | 96  |
| GAAATACATTTAGACGCAGC | 38986 + | AGG | 239 | 480 |
| GATAACATGTAATGATTACC | 30148 - | TGG | 360 | 365 |
| AATCAATCGCAACAGAGATT | 14055 + | GGG | 187 | 520 |
| ATTGAACAAGCGCAAGCTAA | 23405 + | CGG | 494 | 242 |
| TTACTCAATTGAATCGCGTT | 33135 - | AGG | 473 | 258 |
| AATTATCGTTTATCTGAATT | 39172 + | AGG | 429 | 296 |
| TTTCTGTTCAATTTAGAGTT | 14132 - | AGG | 375 | 342 |
| TGGTTCTTTGATGTACTION | 31085 + | TGG | 417 | 300 |
| ATGGCGCTTACTTTTAC    | 10165 + | GGG | 633 | 105 |
| AGAAGCGAAAGAGAAGTACG | 12561 + | AGG | 393 | 321 |
| CCTATCAAAGAATACTTTGC | 15807 + | TGG | 309 | 396 |

|                       |         |     |     |     |
|-----------------------|---------|-----|-----|-----|
| TCAGATACACAACCTATGCA  | 30587 + | AGG | 343 | 365 |
| CCGATAATTTGAGCGACTGC  | 25276 - | TGG | 411 | 302 |
| AGTGGTAAACCGCTTGTTGA  | 19958 + | AGG | 283 | 417 |
| CATCATTCTTTTTATAAAAC  | 32594 - | GGG | 514 | 207 |
| GAACAACCGGTTTTATATCC  | 27628 + | AGG | 300 | 397 |
| ACCACAGATCCTATTAATTT  | 40194 + | AGG | 337 | 362 |
| CGATATTTGATATTTAGAGG  | 8827 +  | TGG | 518 | 196 |
| GGTAAATCCTAGAATTGTTA  | 27993 - | AGG | 417 | 287 |
| AAAAGAATTTGATGACGTGT  | 16202 + | TGG | 457 | 248 |
| GCATTAGCTCCTGTTGACTT  | 21423 + | AGG | 382 | 314 |
| ATGATGTCAGGTACAGAAAA  | 2060 +  | AGG | 295 | 389 |
| GGCTAATTACAGATATCCTA  | 34564 + | AGG | 312 | 373 |
| TTTTTGAACATACTTGCAA   | 19363 - | AGG | 168 | 501 |
| CCGCCCATGATTGCTTTTGC  | 36016 - | TGG | 459 | 237 |
| TCTAAACTTACAGATGATTA  | 32287 + | CGG | 387 | 297 |
| GAAAGTGTATTGCAACAGAT  | 37145 + | TGG | 380 | 302 |
| TAGATAGAGTGTGTTGACTTG | 10031 + | TGG | 21  | 625 |
| ATAATTATGGATCCTATTTT  | 6801 -  | AGG | 230 | 433 |
| AAAAACTTAAAAATATGGAT  | 13274 + | TGG | 551 | 142 |
| TTCTTCAATACTGTCTTTAA  | 28064 + | AGG | 596 | 100 |
| ACAGTTCGCTACACAATACG  | 21938 + | AGG | 363 | 309 |
| TAATATCGTAAAAGCGTTAG  | 25177 + | TGG | 178 | 473 |
| AGAATTGGTTAACACCTCTT  | 30867 - | TGG | 416 | 258 |
| TTGATATCAAAACAGCTGAA  | 7505 +  | TGG | 149 | 499 |
| TAGAAACATTCTCTAAAACT  | 6734 -  | TGG | 71  | 567 |
| GAATCATTTAAATTAACAAT  | 22317 + | TGG | 536 | 146 |
| AGTTGTCTATAAATATGAGG  | 11843 + | AGG | 179 | 468 |
| GCATTGATACCAGTGATTGC  | 24320 + | CGG | 575 | 110 |
| AATTAACCTACCCACCATAT  | 14403 - | AGG | 177 | 469 |
| TATGGATAGGTTTAAGCAAG  | 16139 + | AGG | 308 | 349 |
| ACGCTTGTGGAAAAGCTAAA  | 40280 + | AGG | 156 | 484 |
| TTCAGGCAAGGTGCATGCTC  | 31836 + | AGG | 403 | 260 |
| AAAAAGTAGAGCTTAAGATA  | 26954 + | AGG | 397 | 265 |
| CAGGAGAAAGCGCAAGTGGT  | 39005 + | GGG | 248 | 396 |
| TAAAAGATTTTATGTTTGA   | 11220 + | GGG | 301 | 348 |
| TTTACACCAATAAATAGCTT  | 18425 - | GGG | 233 | 409 |
| AGCAACTAACTTTATTTTAG  | 10288 + | AGG | 243 | 399 |
| ACACATTGTACCGAATTAGA  | 36096 + | TGG | 401 | 252 |
| TTTTTCGGGAATTTCATTTT  | 13034 - | AGG | 281 | 360 |
| GACATCGCAGTTTGGCACCC  | 34634 + | TGG | 114 | 510 |
| AGTTGGGATCAATGTTGAGG  | 13009 + | AGG | 503 | 158 |
| TTTGAAAGCAGTGCCAATT   | 5136 +  | TGG | 44  | 570 |
| CAAAAAGCTGAAGAAAATAA  | 5073 +  | CGG | 476 | 179 |
| GCTTTTTGCTTATCTGTCTT  | 5042 -  | CGG | 157 | 466 |
| AATGCCCTACATCTTGTGC   | 14480 - | AGG | 412 | 235 |

|                       |         |     |     |     |
|-----------------------|---------|-----|-----|-----|
| GCGCGCTCTAGATTTAACTT  | 8981 -  | AGG | 151 | 470 |
| CAAATAGATAAAGGTGACAG  | 14987 + | TGG | 148 | 472 |
| TTAGCATACCTTGTGTTACG  | 17090 + | CGG | 527 | 127 |
| GGCTCAGCAGGGTTTCAAGC  | 4695 +  | TGG | 310 | 322 |
| GGTGTGACTTAGGTGACAT   | 36287 + | TGG | 250 | 372 |
| TTTGACACAACACAAACATC  | 27196 + | AGG | 496 | 149 |
| AATTTAGATGCATCTACTTT  | 28096 - | TGG | 213 | 403 |
| TGCAAAAAGATTTCTTTAATG | 19849 + | AGG | 352 | 277 |
| ATTC AAGAAACACAAAAGAG | 17135 + | TGG | 272 | 349 |
| TAAAACAATTAAGGATTTA   | 21073 + | TGG | 463 | 176 |
| AGATGTTAAAGCTAATGATA  | 27465 + | AGG | 450 | 187 |
| CTGTGGTTTTGTTGGTTGTA  | 40162 - | GGG | 9   | 585 |
| AAGTTAAGAAGTAACGCGCT  | 19258 + | AGG | 260 | 358 |
| TTATAGCGTTGACCAAAACT  | 34720 + | GGG | 353 | 273 |
| CTCATCAATATCATTCTGAT  | 17679 - | TGG | 578 | 67  |
| ACAATCCAATGTATTTTATT  | 38609 + | AGG | 375 | 247 |
| CATTGATCATATAGTTGTAA  | 34987 + | TGG | 439 | 189 |
| TGTTTTTGTCCGTGTCTTTA  | 29361 - | CGG | 122 | 475 |
| TATAATTGCTTTTATATAGT  | 40003 + | AGG | 276 | 335 |
| TAATTAAGTAAAGTGTATTA  | 37371 - | GGG | 401 | 222 |
| AGAACTGGAGAAATAACTTA  | 30344 + | TGG | 480 | 150 |
| GATGATTATAACGTAGATAG  | 31729 + | AGG | 414 | 209 |
| TATTAGACGAGTTAATTA    | 10350 + | TGG | 448 | 178 |
| ATAGCGCAGACATACAAGCT  | 13526 + | AGG | 204 | 398 |
| CCTTAACCGCCATTTTAGC   | 23980 - | GGG | 576 | 62  |
| TAACAACATCACCTATTTTA  | 28563 - | GGG | 234 | 369 |
| TAAATCTTTTTAGAGTTATA  | 32910 - | AGG | 436 | 179 |
| GGATTCTGAAATAGGTAAAA  | 16672 + | TGG | 330 | 272 |
| AATACTTGTGTTGTGTTACC  | 31387 - | CGG | 241 | 350 |
| CCTTACAACACTTCAACTAG  | 19940 + | TGG | 232 | 358 |
| TATCAATTCATTTTCATGTT  | 9470 -  | CGG | 410 | 197 |
| ATGCTTGGTTTTTCGTCTGA  | 35542 - | TGG | 610 | 14  |
| TTAATTAAGTAAAGTGTATT  | 37372 - | AGG | 152 | 427 |
| TAGTATTAGGAGACTTTACA  | 28698 + | AGG | 217 | 368 |
| ATTTAAGTTTATTGATGATT  | 15923 + | GGG | 220 | 365 |
| CGTATATTTCTTCTTTTGA   | 29736 - | TGG | 289 | 302 |
| CAGTATCCCTGATATAGAC   | 22054 + | AGG | 162 | 416 |
| AACAATGATTTTATGAAAGA  | 20736 + | TGG | 471 | 137 |
| TAACGACCCTGAAAAATGGT  | 27297 + | CGG | 422 | 179 |
| AGATTTAGCGTTTTAAGGTG  | 5171 +  | TGG | 125 | 446 |
| TGTT CAGAACTTATAGATAA | 31662 - | CGG | 340 | 251 |
| AATGAATGTTAAGCGAATAT  | 35704 + | GGG | 225 | 351 |
| CGACGAAAGTTATTGGGATT  | 7647 +  | AGG | 48  | 510 |
| ACATTAGTGGAGTATTAAC   | 20899 + | AGG | 227 | 346 |
| TTAACGATAGAAAAAGATTA  | 12956 + | TGG | 477 | 117 |

|                       |         |     |     |     |
|-----------------------|---------|-----|-----|-----|
| TCATAGAGGGCAAGAGCCAA  | 14619 + | CGG | 180 | 384 |
| TTATCTAAAGGGACTTAAGA  | 19002 + | CGG | 360 | 219 |
| CGTTACGAAATAAGAGAACC  | 23483 + | TGG | 195 | 366 |
| TTGCGTCCTGCGTCAATTGC  | 21647 - | AGG | 423 | 159 |
| AACGGAAATGTACCTATCAT  | 17303 + | TGG | 289 | 279 |
| GTGTGATATGCGTCAAACAC  | 29449 - | TGG | 359 | 214 |
| TCGTCATGATTATGATTTTT  | 37213 - | TGG | 288 | 278 |
| TGAAAAAGGGCAAACGCTTG  | 40267 + | TGG | 197 | 358 |
| GCTAATTACAGATATCCTAA  | 34565 + | GGG | 338 | 230 |
| ACTCTCAATGAGATTAATTA  | 34024 + | AGG | 340 | 226 |
| CCAATGTACTTGATACGATT  | 25950 + | TGG | 500 | 81  |
| CTAACACATCACCTATTTT   | 28564 - | AGG | 311 | 251 |
| CGTATCGATCTAAAAGCACA  | 36377 + | TGG | 158 | 388 |
| TTTTCAACAGGATTTAGTGA  | 10412 + | TGG | 274 | 283 |
| TTGTATTCTAAATTAATAGC  | 39244 + | CGG | 376 | 189 |
| GCACATATCCATGTAGTGAA  | 10146 + | TGG | 301 | 255 |
| TTATGATTTGTATAAGCTGT  | 8936 -  | TGG | 293 | 261 |
| AGGAAATATCTCAGTTATTA  | 27513 + | AGG | 354 | 205 |
| AACAATTCAACCCAGATGGT  | 38240 + | TGG | 166 | 373 |
| GGTATATATGCTACTGGTCC  | 21546 + | TGG | 225 | 319 |
| GTATTCGATAATTTCTTTAT  | 7357 -  | AGG | 541 | 32  |
| TCTACCGCTTCTTTACCTAT  | 29095 - | TGG | 255 | 290 |
| TAAGCGCAGTTAACACATCT  | 32351 + | AGG | 381 | 176 |
| ACATACTTTTTGATTGAGTA  | 20756 - | AGG | 441 | 120 |
| AACCAAGCTATGTTGATAGA  | 376 -   | GGG | 357 | 194 |
| GTAAGTCGTAAGGTACATAT  | 21141 - | AGG | 212 | 324 |
| CGATAAGAAAATAGAAGAGT  | 21350 + | GGG | 140 | 388 |
| GAAAATCCGGAGCTATCACA  | 10379 + | AGG | 191 | 340 |
| AATGGTTTGACAATTCATTA  | 38216 + | GGG | 127 | 395 |
| GACGCAAAGCGCTTTTAATA  | 30810 + | GGG | 396 | 151 |
| GATAATCCAACATCTCAAGA  | 38027 + | AGG | 465 | 88  |
| AACTAACAAAACAAATACTG  | 33695 + | AGG | 158 | 364 |
| TAGGGAATGGAATACACAGT  | 7338 -  | CGG | 265 | 266 |
| TATTAGAATTAACCCAGTTT  | 34716 - | TGG | 291 | 242 |
| ACTTTAAATATTTTCGATGGT | 21466 + | GGG | 454 | 94  |
| TAGATTGGTTAACTCAATTG  | 25653 + | TGG | 249 | 276 |
| AGCAACGTGATGAGCTTATT  | 11439 + | GGG | 323 | 209 |
| TCAAATGCTTGTTTGTCTTT  | 27102 - | TGG | 62  | 443 |
| AACGTCCAGCAAATAGTGCT  | 27008 - | TGG | 187 | 329 |
| TGAGGAAGAAGCCACGAATA  | 10815 + | CGG | 170 | 344 |
| ATTAATCGGCAAAGTAGCTG  | 26350 + | AGG | 126 | 373 |
| CTTACTACCTGCCTATATGG  | 14408 + | TGG | 384 | 140 |
| GACGGTAAACATACCTATAG  | 27571 + | AGG | 272 | 241 |
| TCTTTGCTTTATTATCAAAC  | 38333 - | GGG | 238 | 271 |
| TTATTGTTAATTGTTATTGA  | 4510 -  | AGG | 13  | 474 |

|                      |         |     |     |     |
|----------------------|---------|-----|-----|-----|
| AGCGACAGGAGAGGTAGACA | 39576 + | AGG | 204 | 301 |
| AAAAAGGTTATCAAACACGC | 36506 + | TGG | 365 | 154 |
| TGAAGAAGAAATATTTAAGA | 20675 + | TGG | 134 | 361 |
| TCGCGAGTAAAGTAGCTGAT | 26232 + | GGG | 289 | 216 |
| TACAAGGCACTGATGATGAT | 29184 + | TGG | 304 | 201 |
| TTGAAATGAGGTGCATACAT | 34364 + | GGG | 96  | 388 |
| CTAAAAATTAATTAAGGA   | 4603 +  | CGG | 353 | 155 |
| GAGAAATATAAGCGAAAAGG | 18600 + | TGG | 242 | 254 |
| AAACAGTTACAACTGCTAA  | 28907 + | TGG | 260 | 237 |
| ACTAGTGTTCATATAATA   | 10577 - | CGG | 335 | 169 |
| GTTTTAATGTCTTAAAGT   | 33731 - | TGG | 317 | 185 |
| AGCAAACGCACGCAAGTTTG | 24682 + | AGG | 65  | 411 |
| TATACTATCTGTCAAAGTAG | 26540 - | AGG | 322 | 179 |
| GCCTTTGGATACTCATTTTA | 23608 + | TGG | 361 | 140 |
| GAAGTTGAACAACAAATCAA | 32221 + | TGG | 368 | 130 |
| GCTGGAATACTGCGATTATT | 13312 + | CGG | 249 | 237 |
| AAAATAAAAAGATGCAACAA | 400 -   | TGG | 184 | 295 |
| TCGTCCCACACTCGATATTT | 10901 - | CGG | 293 | 196 |
| GATTAAAAACTTAAAAATA  | 13269 + | TGG | 359 | 136 |
| TTGCCAACGCTTAAGTTGTT | 38625 - | AGG | 290 | 198 |
| TTATAGGCTCTCCGTTTGTA | 16165 - | GGG | 100 | 369 |
| TAGCACTAACACCTGCTGAA | 23328 + | TGG | 203 | 276 |
| TCATTCATATTAGCCATCAT | 13166 - | AGG | 129 | 342 |
| CGCTCAGAACTCATAGATG  | 8501 +  | AGG | 30  | 430 |
| AACTAGGTGTAATGGACGCT | 11379 + | AGG | 84  | 381 |
| GAGTTTTCCCCTGTGGTTT  | 13934 - | CGG | 106 | 359 |
| AGGTTTAGTATGTGTGTATA | 16224 - | TGG | 173 | 298 |
| TCCTGCCGTTAAATATAGAG | 6373 -  | CGG | 338 | 147 |
| GACCGGTTTACCATCATACA | 40364 + | AGG | 113 | 350 |
| ATAGACAGGTTTACTAAGCA | 22068 + | TGG | 225 | 248 |
| TAGATATAAAGAGTCTATTA | 15656 + | AGG | 126 | 337 |
| CTTGTTTCAGTAACGATGCT | 35557 - | TGG | 103 | 357 |
| ATGAAGGCTTTTTCCACT   | 37484 - | TGG | 433 | 59  |
| CAAAGCAGAACCTGAGTTAT | 36931 + | TGG | 147 | 316 |
| ATGCTCGGGATGGTCAGGGT | 15525 - | TGG | 208 | 260 |
| TAAGTACGGTGCTGATAGCA | 21308 + | TGG | 142 | 318 |
| GTCGTTTTCCCGTCAAAGTA | 38434 + | TGG | 426 | 58  |
| TTTGATACAGCGGAAGAGCT | 10224 + | CGG | 122 | 332 |
| AAAGAGTGGTTTGAAGCTGC | 22575 + | AGG | 318 | 155 |
| ATCAAGTGGGTGTGTTGGGC | 18416 + | AGG | 85  | 365 |
| ATAGAGTTAACTAACAAATA | 15306 + | TGG | 323 | 149 |
| ATGAGTGTCGTGAAGATTA  | 9446 +  | CGG | 217 | 244 |
| GACGTCCAAGCACTATTTGC | 27019 + | TGG | 252 | 211 |
| TGTCCTAATACTTGTAAAT  | 25693 - | AGG | 293 | 173 |
| AACACAACAATTACGTATGA | 39487 + | CGG | 362 | 109 |

|                       |         |     |     |     |
|-----------------------|---------|-----|-----|-----|
| CTATAAATATGAGGAGGCAC  | 11849 + | AGG | 379 | 92  |
| GTGTGAGGGAATTCGTCGTA  | 20968 - | TGG | 48  | 390 |
| AGAAAGTTTGTTCCTACTAA  | 33474 + | CGG | 262 | 196 |
| GCTCTCTCGTTGCATAATTC  | 9614 -  | TGG | 137 | 308 |
| CACTGGATAGACAAATGTCT  | 35616 + | AGG | 104 | 337 |
| CATGAAGTTGCATTATACGG  | 38851 + | TGG | 272 | 185 |
| AACAACCTCATTGAAAGATTA | 24206 + | CGG | 256 | 199 |
| GTATACGGAAAAATTGGCTC  | 3923 +  | AGG | 13  | 418 |
| TTAGATCGTTATCATTGAA   | 19090 + | AGG | 396 | 72  |
| AATTACGACTTGATTAAGCA  | 35369 + | AGG | 399 | 69  |
| CGAAAAGGTGGTAATTGATA  | 18612 + | TGG | 380 | 84  |
| TTAATAATTGTCTTTGATCT  | 23367 - | AGG | 284 | 170 |
| ATTTTGCTACATTAATTATA  | 39661 + | GGG | 57  | 374 |
| ATAGATACTTCAGATAAGAA  | 24634 - | TGG | 323 | 133 |
| ACATTGCCTGGCGTGTATGT  | 19534 - | TGG | 103 | 331 |
| GATTCACCCACAACAATATA  | 21830 - | TGG | 280 | 170 |
| GAGTAATCGGAGACGATTTTC | 8417 +  | AGG | 40  | 386 |
| GAAGCGCCACCGCTTGTTGA  | 28439 + | TGG | 205 | 237 |
| AATAAAAAAGGGCAGAAAAA  | 80 +    | GGG | 331 | 122 |
| ATCTAATCGAACAAGAAGTA  | 19145 + | CGG | 159 | 277 |
| TAATGTTTGGATTTACCAA   | 33944 + | CGG | 160 | 276 |
| TTCTTTACTTCGTATAAGAT  | 13599 - | CGG | 259 | 185 |
| TGGGAAATTCACCTTTATG   | 6700 -  | TGG | 216 | 223 |
| TCGCTATTGCGTTAGATTGG  | 6827 -  | GGG | 207 | 231 |
| TAACCTCACAGTCATATCTA  | 11275 - | AGG | 116 | 313 |
| CGTGGACGAGGCGAGCCCAT  | 8876 -  | AGG | 153 | 278 |
| TGAGTTGTTTCGACAAAGATA | 17164 + | TGG | 161 | 270 |
| GATTTTCCTAAAGACTTTAA  | 31343 + | AGG | 396 | 57  |
| TCAATGGACTTTACATTTGA  | 19452 - | AGG | 441 | 16  |
| CGTTTTAGCAATATGATTCT  | 29843 + | AGG | 275 | 164 |
| AGCTCCTGCACAAGATGTAG  | 14492 + | GGG | 222 | 211 |
| CTCTTATCACCTTCGTTTGT  | 27318 - | AGG | 26  | 387 |
| GGGTGTCTTACTAACTTCC   | 34753 - | CGG | 316 | 125 |
| AAAAAGATTATGGCTTATAT  | 38933 + | TGG | 319 | 122 |
| TATAACGATCCTGGAGCAGT  | 38752 + | AGG | 241 | 192 |
| CATTGATACCGTCGCCGTTA  | 29850 - | TGG | 121 | 298 |
| ATTGAAGAAAGGTTATAACA  | 14105 + | GGG | 290 | 145 |
| CGGAAAGCATATATTGACGC  | 14639 + | AGG | 301 | 135 |
| GTTTACACCAATAAATAGCT  | 18426 - | TGG | 129 | 290 |
| TCAGATACATGGCCTCTGCC  | 40024 - | CGG | 89  | 326 |
| AAAAATGATGGTGTGACTT   | 36278 + | AGG | 246 | 184 |
| ACAGTTCTAACATTTTTGAC  | 25035 + | TGG | 180 | 242 |
| CGATCAGTCTGATTTGATGA  | 13784 + | GGG | 16  | 390 |
| TTACTCGTTTCTACACTCAT  | 5540 -  | AGG | 263 | 166 |
| AAAGTTACATTACAGCCCCT  | 6034 -  | GGG | 161 | 258 |



|                       |         |     |     |     |
|-----------------------|---------|-----|-----|-----|
| TACGTCAGCGATTTATAATC  | 30412 + | CGG | 214 | 209 |
| GATATGAAAATGTGGATTCT  | 34159 + | CGG | 129 | 285 |
| GACTTTAAATATTTTCGATGG | 21465 + | TGG | 73  | 332 |
| GTTGTTTCAAATGTACGAGA  | 10552 + | TGG | 207 | 209 |
| TTCTATGAACGTAATATCAA  | 15699 + | CGG | 335 | 93  |
| ATATCACTGTTCTATGGCT   | 25812 - | TGG | 206 | 208 |
| ACTTTTTGGCAGTAAATTTG  | 7566 +  | AGG | 13  | 382 |
| CCAGCAAAAGCAATCATGGG  | 36032 + | CGG | 229 | 187 |
| TCTGTGGTTTTGTTGGTTGT  | 40163 - | AGG | 5   | 389 |
| AATACTTTGCTGGTGTGCGAC | 15817 + | TGG | 145 | 262 |
| ATTCGACTAAAGGTAAGAGT  | 14664 + | GGG | 110 | 293 |
| GTCATTGACATTAACGAAGG  | 3983 +  | TGG | 69  | 330 |
| CGATTCAAGGTGTAGTAGAT  | 25638 + | TGG | 184 | 226 |
| TAGCGCGTTGTAAAGCTCTT  | 23733 - | TGG | 144 | 260 |
| TCAAAGTATGGTGGCGGAGC  | 38446 + | TGG | 154 | 249 |
| ACAGTTAAGAGTCAGTGCTT  | 34322 + | CGG | 196 | 210 |
| TGTATTAGCTGATGTAATAC  | 13880 + | CGG | 118 | 280 |
| TCGTTATATAGCGACAGGAG  | 39567 + | AGG | 174 | 228 |
| AATCATAAAGCGTATATACA  | 8967 +  | AGG | 265 | 145 |
| GGTAATAGAATAAGTAGTTT  | 39601 + | TGG | 149 | 249 |
| AATCAAGAAAAGTTTTATAA  | 4674 +  | CGG | 308 | 105 |
| GCAATACCTTTAAAGTCTTT  | 31333 - | AGG | 301 | 109 |
| GGTATTAACAGCAGTTTC    | 25613 + | CGG | 59  | 327 |
| CATTTCCCTTCTTGAGATGT  | 38017 - | TGG | 183 | 215 |
| TCATACTACGCCAATATTA   | 35319 - | GGG | 152 | 242 |
| ATCAAAATGGACACGCCAAA  | 14776 + | AGG | 54  | 328 |
| AAAAACCTGTATTAATAAAA  | 5956 -  | CGG | 221 | 176 |
| AGAGCATGGTCAGAACAAGT  | 25082 + | AGG | 39  | 339 |
| TTTACTCAAGAAAAATGGAG  | 20639 + | TGG | 252 | 146 |
| CATGCAAGTTTTAGGTGTTT  | 25738 + | TGG | 103 | 280 |
| TTATCAGATTTAAAAATCGT  | 31277 + | TGG | 187 | 204 |
| ATGGATTTATTCAGCTGTAT  | 30283 + | TGG | 178 | 211 |
| ATAAACGAATTTGGCAAAGA  | 11552 + | TGG | 371 | 36  |
| TGGAACCCTGCAATTGACGC  | 21657 + | AGG | 140 | 244 |
| TAATAAACTTTAGAACAAAC  | 27615 + | CGG | 205 | 185 |
| CCGAACCTATTCCGTTGCCA  | 34635 - | GGG | 209 | 181 |
| AGAGCACCATTATAGTGCC   | 31087 - | AGG | 210 | 180 |
| ACGCATGTAATGGTCATGTG  | 9148 +  | TGG | 83  | 294 |
| TATGAAACAGGGGTCCAAC   | 11363 + | AGG | 95  | 283 |
| GGCGTTATTCCAGCAGAACA  | 19595 + | AGG | 171 | 214 |
| CAAAAAATCAAGCAGAAAAA  | 38198 + | TGG | 349 | 53  |
| TTAAAGTGATTTAAAACTG   | 6190 +  | AGG | 295 | 101 |
| ACTAATGGCGTTGCGCAACC  | 38545 + | TGG | 285 | 109 |
| TTTGAGTGGTTACGTCAAAA  | 2324 +  | CGG | 45  | 325 |
| AGATATGACTGTGAGGTAA   | 11295 + | AGG | 167 | 214 |

|                      |         |     |     |     |
|----------------------|---------|-----|-----|-----|
| TCATCTAAATCATAAGTAAC | 16561 - | AGG | 184 | 198 |
| CGAAAGTTATTGGGATTAGG | 7650 +  | GGG | 216 | 169 |
| AGATATGCTGGGTTCTGTAT | 30949 - | TGG | 135 | 240 |
| GGCGTTCAAGTGGTTCAGAC | 15372 + | AGG | 136 | 237 |
| CAACGTTGCCGAAACCACAA | 13942 + | GGG | 25  | 337 |
| AATACACTTTACTTAATTAA | 37391 + | GGG | 190 | 188 |
| TTAAGTACTGCCATTATTGC | 24334 - | AGG | 256 | 128 |
| TACACAGTAGCTAATGTTAA | 39406 + | AGG | 28  | 332 |
| ATCAAATCAATTGGAACGAT | 28973 + | TGG | 172 | 202 |
| TCATCAAGTTGTACGTCTAA | 12036 - | CGG | 162 | 211 |
| TGGAGAAGAAAGCAAGTGCA | 11496 + | TGG | 35  | 322 |
| AAAAAGAGTACGTGGTGGCT | 9541 +  | GGG | 58  | 301 |
| CAGCTTTTTACCGCAAAGT  | 38406 + | TGG | 124 | 241 |
| TGGCGTATTTTGGGCTTTAA | 25333 + | TGG | 267 | 111 |
| GACGCAGGGTATTCGACTAA | 14654 + | AGG | 159 | 207 |
| TTGAACGCTGCAGGAAGATT | 24785 + | TGG | 109 | 252 |
| TAAATGCCTCTGCAATTAG  | 19861 - | AGG | 189 | 178 |
| TGACACAACACAAACATCAG | 27198 + | GGG | 238 | 133 |
| TCTCCAGTATCAATTAAGT  | 13220 - | AGG | 258 | 114 |
| TTGATACGAATGGTGATGTT | 16731 + | AGG | 126 | 233 |
| AAAAAGAACGGGTAACTCC  | 9509 +  | TGG | 67  | 286 |
| TAAAGGTAGACCCTAATATT | 35325 + | TGG | 94  | 260 |
| ATTCTTAAGTTGTCTTTCAG | 30455 - | TGG | 100 | 254 |
| CGACTGCTTCATAATGTGCC | 5644 -  | AGG | 66  | 284 |
| CTAAACCTGAACGATTAAGG | 16255 + | AGG | 307 | 61  |
| GAGAAAACATGTTGTTAAGT | 23959 + | TGG | 40  | 302 |
| CACATTGACTTACTAGAAAA | 5280 +  | CGG | 16  | 323 |
| ATTTCTACCTGTGCTGTTTC | 31124 - | TGG | 51  | 291 |
| TCAAGTGATTTAGGAATATC | 37684 + | AGG | 249 | 112 |
| TGAATATCATACAAGGTTTG | 25785 + | TGG | 82  | 261 |
| GAAGCATTTCAAAGAAAATA | 1939 +  | GGG | 208 | 147 |
| ATAGATAGTTTTTTATTGTC | 5315 -  | CGG | 208 | 147 |
| AACTGCCATTGTGATGAGGA | 2564 -  | GGG | 15  | 321 |
| TTGTTCAAATTTGTGTCTCA | 24845 + | AGG | 235 | 121 |
| CCGAAAAAATCTCATACTG  | 35645 + | GGG | 346 | 19  |
| TGCCTTGTTCTTTTTTATAA | 39365 - | GGG | 299 | 61  |
| CAACAGACTTTTGCAGAAGC | 28367 + | GGG | 191 | 158 |
| AACCAATGCTCGGGATGGTC | 15530 - | AGG | 35  | 297 |
| TTTAATCATGAAAGACATTA | 19621 + | TGG | 305 | 53  |
| AAAAAGCGCATCTCAACCGA | 37312 + | CGG | 195 | 151 |
| TCCAAAGCCCCTGTAAATAA | 23060 - | CGG | 148 | 193 |
| GTATTGTTGTACCACTCATA | 29337 - | GGG | 155 | 186 |
| CTTTTTGGCAGTAAATTTGA | 7567 +  | GGG | 32  | 297 |
| ACTAAAAATTGATGTGCAGA | 31426 - | CGG | 259 | 92  |
| ACAACATTAATAATGA     | 22794 + | CGG | 220 | 127 |

|                       |         |     |     |     |
|-----------------------|---------|-----|-----|-----|
| CAGTGCCTTGTAATATGATT  | 29157 - | AGG | 150 | 190 |
| GCATTCTCGCTAGTTTAGA   | 14879 + | TGG | 162 | 179 |
| AAAACCAACGTTTAATGATT  | 4198 +  | GGG | 41  | 287 |
| AGAAACATTCTCTAAAACCTT | 6733 -  | GGG | 270 | 80  |
| AAGTCACGTTGTAGTGGAAC  | 15498 + | TGG | 144 | 193 |
| GCGAATGTAGTTGACTCAGA  | 33175 + | CGG | 181 | 157 |
| TTAAATCAAGTGGGTGTGTT  | 18412 + | GGG | 63  | 263 |
| TATAAATAATTTTCGTTCTA  | 30111 - | GGG | 274 | 72  |
| TGATTGGTTACACGGTTATT  | 29200 + | GGG | 100 | 227 |
| TGTGGATTCTCGGTTTGATA  | 34169 + | GGG | 153 | 177 |
| CTACCATACTTTGAAAGTGT  | 27250 + | CGG | 218 | 117 |
| CAGTCTTGTCGGTTACAAAG  | 20547 + | AGG | 163 | 164 |
| ACCTAGATTACATTTGTTTA  | 36406 + | TGG | 176 | 151 |
| CATTAACCTTTTTATGTGT   | 33761 + | GGG | 133 | 189 |
| AACTAATCAAGAATTACAG   | 39453 + | GGG | 193 | 133 |
| GCACGTTACGGTATCTTACA  | 20255 + | AGG | 104 | 213 |
| AAAATAGAATAGTTTGTGTA  | 33054 - | CGG | 292 | 43  |
| TTAAATCTGACGCACTTTGT  | 33535 - | TGG | 108 | 208 |
| TCCTAATGAACATAAATCAA  | 32994 + | CGG | 69  | 243 |
| ATGATGCAGGTATCTTATAT  | 30618 + | TGG | 70  | 240 |
| GCAAAAGCAGTCAAAGCTAA  | 8092 +  | AGG | 3   | 300 |
| ATATAAATAATTTTCGTTCT  | 30112 - | AGG | 27  | 278 |
| AGCAGTATTTTTCATAGAGG  | 21694 + | TGG | 70  | 238 |
| ATGCTTTTAGTTCTTTAGAT  | 28776 - | GGG | 115 | 196 |
| AGTGCTAACAATTCATGTTC  | 23296 - | AGG | 277 | 49  |
| GTAGCTCCTGCACAAGATGT  | 14490 + | AGG | 63  | 240 |
| AGGGATAAATATAAATAAAG  | 36215 + | AGG | 159 | 153 |
| TGACGTTAATCTGGAAAGAT  | 10686 + | GGG | 69  | 234 |
| GACGGCTAATGATGATGTAG  | 13736 + | AGG | 183 | 130 |
| GGCAGAGCAATGTCACAAGC  | 18258 + | TGG | 70  | 231 |
| AACGTTGCCGAAACCACAAG  | 13943 + | GGG | 71  | 230 |
| GCATTCTCTGTCGCAGGTCT  | 24416 + | TGG | 93  | 209 |
| GCCAACCCTAACTACTTACA  | 30662 + | AGG | 192 | 119 |
| TTTAATTCTGACGAGTTTAA  | 17285 + | CGG | 270 | 48  |
| GAGTTTATTCGAGGGAAAGG  | 31498 + | TGG | 207 | 104 |
| AGTAAATATAGAAAAGCAAC  | 38090 + | AGG | 13  | 279 |
| TCATACTAATTGAATTGTC   | 27063 - | TGG | 239 | 73  |
| AATCTATCAACTAAGGATGT  | 19287 - | TGG | 195 | 112 |
| ACAAGTGCTAATTAACCTGA  | 17521 + | AGG | 92  | 202 |
| ACTAGATGCTTTCACTAAAA  | 29968 + | AGG | 144 | 155 |
| CTAAAGCTACTGTGCAAGCT  | 23937 + | TGG | 34  | 254 |
| GTTGTCTCAAATGTAGGTGA  | 26264 + | CGG | 237 | 70  |
| CGATAATTTGAGCGACTGCT  | 25275 - | GGG | 135 | 162 |
| TTATGTTAGCGACAGGCGAA  | 38300 + | AGG | 219 | 85  |
| AATTTTATTA AAAAGTCTAC | 27736 + | AGG | 132 | 163 |

|                         |         |     |     |     |
|-------------------------|---------|-----|-----|-----|
| CCAGCTACCAAACCACTAT     | 39267 - | AGG | 160 | 137 |
| TTATCCAGTGTTATAAGTGT    | 21489 + | CGG | 150 | 146 |
| TTATTTCAACAAATGAATGG    | 6473 +  | TGG | 145 | 148 |
| ACCGAATATGGCCAAAAGCG    | 23165 + | AGG | 98  | 190 |
| CGCACGATATAGAAGTAATA    | 26777 + | AGG | 157 | 135 |
| GCAGCTTCAAACCACTCTTT    | 22556 - | CGG | 86  | 199 |
| TTCCTAAAAGCTGGATTGTA    | 29485 - | TGG | 109 | 178 |
| ACCTTGTAAGTAGTTAGGGT    | 30647 - | TGG | 174 | 116 |
| TCAACTCGCATGATTATTTT    | 9209 -  | TGG | 209 | 84  |
| TTGAACAAAGGTTATATAGT    | 12992 + | TGG | 140 | 145 |
| CTTTTTAATAAAATTGGCAT    | 27712 - | AGG | 156 | 130 |
| CGGATTAGTACCTGCAATAA    | 24340 + | TGG | 54  | 222 |
| ACAAGACAATGCCCTATGAG    | 29342 + | TGG | 65  | 211 |
| TAAAGACGATAGAGAGAGAA    | 16363 + | TGG | 173 | 113 |
| AGGCACAGGGCGATGAAAAT    | 8521 +  | AGG | 122 | 159 |
| GAGATTAAGTCACGTTGTAG    | 15492 + | TGG | 162 | 120 |
| GCGATTCATGGTAAGCCTAT    | 39268 + | AGG | 104 | 172 |
| ATGCACTTTTCGGACTGTTA    | 18887 + | GGG | 121 | 156 |
| TAAAGTAGTGCTACTTGTTT    | 33214 - | TGG | 63  | 208 |
| TGTAAAGTCCATTGAAGAAA    | 19476 + | TGG | 101 | 172 |
| GCACCAGCAAGTATATATTG    | 15236 - | AGG | 175 | 104 |
| CACTAAGTCGTTATATCCTA    | 28601 - | TGG | 94  | 177 |
| CGTATTGATAATACAGGTTA    | 29903 + | TGG | 74  | 195 |
| TCAACAACCAATGCTCGGGA    | 15535 - | TGG | 165 | 112 |
| AGAGGGAGAGTCGCTCGTAC    | 23125 + | TGG | 124 | 148 |
| TTTTTGGCAGTAAATTTGAG    | 7568 +  | GGG | 207 | 72  |
| TCACAAGTCCATTGTGATG     | 2568 -  | AGG | 107 | 162 |
| TAAGTTTATTGATGATTGGG    | 15926 + | TGG | 242 | 40  |
| CGTAACTATTCTGATATAGA    | 26890 + | GGG | 141 | 131 |
| TTACTAAGCATGGCACGATA    | 22078 + | CGG | 135 | 136 |
| CCTACTATTATGCAGTTAAT    | 25154 + | CGG | 179 | 96  |
| ACAATAACAGAAGCTTGGAA    | 25592 + | CGG | 138 | 132 |
| GTAAGAAACTTATTTACGA     | 37444 + | AGG | 167 | 104 |
| CACAAATGATTTAGGGTAGG    | 38158 + | TGG | 57  | 202 |
| TAAGTACTAGCCACTGTGTATAT | 13350 - | AGG | 133 | 133 |
| CATGTTATTTGGCGTTCAAG    | 15362 + | TGG | 219 | 55  |
| AAAGTAAAAGTTAAGACGAT    | 13564 + | TGG | 103 | 159 |
| TAGTAAACCTGTCTATATCA    | 22045 - | GGG | 179 | 90  |
| TAAGAATTATCTTAAGACGT    | 14304 + | GGG | 190 | 80  |
| TTAAGAAACTCTTTTGATAA    | 19804 - | CGG | 256 | 19  |
| GAGTGGGCAAAGTCGAATAT    | 34433 + | TGG | 26  | 226 |
| AATCGAACGCTTTCAATGTT    | 26027 + | TGG | 52  | 201 |
| GCTACAAGCATAATTTTTTTT   | 38703 - | AGG | 95  | 161 |
| CCAGCAAAGTATTCTTTGAT    | 15791 - | AGG | 75  | 179 |
| TCGTTTGTAGGCAATCTATC    | 27306 - | AGG | 98  | 158 |

|                       |         |     |     |     |
|-----------------------|---------|-----|-----|-----|
| AGAGGATAGCTCTTTATTAA  | 26522 - | AGG | 172 | 91  |
| ATACGTGGTATGACATCGTT  | 15423 + | TGG | 205 | 61  |
| TATTTTTGAGTAATCGTGTA  | 23240 - | AGG | 98  | 156 |
| TTAATTAAGTTATCGATATC  | 9098 -  | CGG | 173 | 86  |
| GATTTTAGGATATAGCTTCT  | 34271 + | GGG | 117 | 136 |
| CAGGCGCCCAAGCTATTTAT  | 18435 + | TGG | 76  | 173 |
| AAAGGAACGCTCGACGGACA  | 35813 + | AGG | 51  | 195 |
| CTTTAATAGGGGTA ACTAT  | 30821 + | TGG | 158 | 98  |
| AGAGTTATTACAAATACAAA  | 11907 + | AGG | 162 | 94  |
| GTATTACGAAAGCGTGGACG  | 8888 -  | AGG | 91  | 158 |
| TAACTTTATTTTAGAGGAGA  | 10294 + | TGG | 225 | 37  |
| GGACACACCGCAATAGTAGT  | 34676 + | AGG | 96  | 152 |
| TCAGTTGTATGAAAATATAA  | 12618 + | GGG | 162 | 91  |
| GGACGCAAAGCGCTTTTAAT  | 30809 + | AGG | 157 | 94  |
| AAAGGCGAACCGGGACAACC  | 36791 + | TGG | 117 | 130 |
| TGAATAAACCTACTATGATT  | 25845 - | TGG | 60  | 181 |
| ATGACCCGCGTCACCTAAT   | 35175 + | TGG | 130 | 117 |
| AACATCTCAAGAAGGGAAAT  | 38035 + | GGG | 49  | 190 |
| ATCGAAAGGAGGTTAGCCTT  | 23593 + | TGG | 97  | 146 |
| AATATGATTCTAGGCCATAA  | 29852 + | CGG | 149 | 97  |
| GCCGTTATTACAAGGGGCTT  | 23075 + | TGG | 114 | 127 |
| CTCCGCCACCATACTTTGAC  | 38426 - | GGG | 71  | 165 |
| TTCCCGTTAGCATCAAATAA  | 20128 - | TGG | 93  | 145 |
| TGGCGTTGCGCAACCTGGTT  | 38550 + | GGG | 52  | 182 |
| CTTAATTTAGGCAAGTATCA  | 35753 + | AGG | 6   | 223 |
| TATAAACAAATCGGCTTAAA  | 36179 + | AGG | 61  | 173 |
| ATTTTATTA AAAAGTCTACA | 27737 + | GGG | 31  | 200 |
| TAACCGACACTTTCAAAGTA  | 27237 - | TGG | 190 | 56  |
| CTAGCCAATTAGGGTGACGC  | 35163 - | GGG | 28  | 202 |
| ACCGTTGATTTATGTTTCATT | 32979 - | AGG | 129 | 110 |
| TGAAGCATTTC AAAGAAAAT | 1938 +  | AGG | 4   | 222 |
| ATACGCACTAGCACTTATAA  | 11646 - | CGG | 109 | 127 |
| ATAATTTTGTAATATTCTTA  | 31242 - | GGG | 145 | 94  |
| TCCGAACCTATTCCGTTGCC  | 34636 - | AGG | 77  | 155 |
| AGATGGCACGGAAGATATTA  | 8654 +  | AGG | 58  | 171 |
| GGGAGAAAAGGAGCAATGCC  | 22899 + | AGG | 50  | 178 |
| CGTTTGCTAAAAATAAAGGT  | 36003 + | TGG | 26  | 199 |
| AACACAAAGAAGTACATCAA  | 13391 + | GGG | 162 | 76  |
| GAAACGAGAATAAAAAATGA  | 36266 + | TGG | 116 | 117 |
| GAACGGGTAACTCCTGGAA   | 9514 +  | TGG | 70  | 158 |
| CGACTAAAGGAGGCAACCAA  | 29611 + | TGG | 81  | 148 |
| ATATCAGTATTTTGATGATG  | 9319 +  | TGG | 188 | 51  |
| GAATTTAAAGTCAAGAAGTA  | 20837 + | TGG | 114 | 116 |
| CGATTCTATCGTTATTCATC  | 34592 + | TGG | 151 | 82  |
| CTATTTTAGGGTTAGCTTCT  | 28551 - | GGG | 49  | 174 |

|                       |         |     |     |     |
|-----------------------|---------|-----|-----|-----|
| TACCTTGTTACGCGGTAT    | 17096 + | GGG | 61  | 163 |
| TGTAGGCGATTCTGTAGATC  | 21229 + | AGG | 6   | 212 |
| TCTTAGGATTCCATCTAATT  | 36090 - | CGG | 82  | 143 |
| AACAATTTATTTGAGTATGA  | 21191 + | GGG | 156 | 75  |
| GTTTTTCGTCTGATGGAGTA  | 35535 - | GGG | 118 | 109 |
| ACTTTCAAAGTATGGTAGTT  | 27229 - | CGG | 78  | 145 |
| AGAAAGGATTACATCAATAA  | 36068 + | AGG | 93  | 129 |
| GAGCGTAATAAACGTGCAGA  | 22419 + | CGG | 178 | 51  |
| AAAAGCTGAAGAAAATAACG  | 5075 +  | GGG | 135 | 89  |
| CTGATGTTTGTGTCAATAAT  | 31578 - | TGG | 130 | 93  |
| AAAGCGTAAAGGGTACAAC   | 17428 + | TGG | 90  | 129 |
| TCATTTAGATGGGGAATCAG  | 18374 + | TGG | 50  | 165 |
| GCAACATGGTTTGGGAATACG | 10259 + | AGG | 37  | 176 |
| CTTCCTTAGATATGACTGTG  | 11288 + | AGG | 17  | 194 |
| AAAAGGTGTAGGCGCCTACT  | 19717 + | GGG | 70  | 146 |
| TTATTGAAGGCGCATCAAAA  | 6761 -  | GGG | 122 | 99  |
| ACAGTTATTAATAACTATT   | 39690 + | TGG | 108 | 109 |
| TTATCTAGATTGAAGCCCAA  | 30182 + | CGG | 109 | 108 |
| TGCAAACCCCGCTAAAATGG  | 23989 + | CGG | 141 | 79  |
| GGCGTTGCGCAACCTGGTTG  | 38551 + | GGG | 28  | 180 |
| TCATAAGTGATACCTTGCAT  | 30583 - | AGG | 90  | 124 |
| GTAGAACTTATGCAAAGTAC  | 11052 + | AGG | 96  | 118 |
| GTGAATGATAGTGCACAAA   | 32062 + | AGG | 140 | 78  |
| GGACATGAAGTTGCATTATA  | 38848 + | CGG | 122 | 94  |
| CCTAACAAACAAGAGATGAT  | 16985 + | AGG | 102 | 112 |
| TTTTTCAATATCAACTATGA  | 10484 - | AGG | 83  | 129 |
| TGCAAGAGGTGGCGCAACAA  | 29080 + | TGG | 159 | 60  |
| AAGTAACTATCGGGTGTAG   | 16067 + | AGG | 146 | 69  |
| AATTTTGCTACATTAATTAT  | 39660 + | AGG | 127 | 86  |
| AAGTAGCTGAACAATCAAAA  | 14763 + | TGG | 20  | 182 |
| GTTGACTCAGACGGCAACGG  | 33184 + | TGG | 110 | 100 |
| CTACCTGTATTACGAAAGCG  | 8894 -  | TGG | 161 | 53  |
| GTGTCTGTTGATGACGTTAA  | 19024 + | AGG | 104 | 104 |
| TACTACACCTTGAATCGCAC  | 25616 - | CGG | 120 | 89  |
| AAGCCTGTAACACTTACATA  | 34774 - | AGG | 62  | 141 |
| GCAGTCATTGGTGTATTCAT  | 25526 + | TGG | 109 | 98  |
| AGTTGTTGGCTTTGGTGCAA  | 24439 + | TGG | 107 | 99  |
| AAACTTACCAATAAGATCAT  | 4908 -  | TGG | 142 | 67  |
| ATTGGAAGTATCAAAAAGT   | 21014 + | AGG | 115 | 91  |
| ATTTGCCACATTTTAGTGTC  | 36871 - | AGG | 34  | 164 |
| GCAAGTATATATTATGATGA  | 13718 + | CGG | 138 | 70  |
| AACTATCGCTTGTAGATGA   | 29699 + | AGG | 21  | 175 |
| ACAAAGCGTTCCTGTATAAT  | 21028 - | TGG | 91  | 111 |
| AATGGCAGTTGTGACGTGGA  | 2593 +  | AGG | 9   | 184 |
| GAGCTTTCCTACGTTGCTT   | 23643 - | TGG | 81  | 119 |

|                       |         |     |     |     |
|-----------------------|---------|-----|-----|-----|
| TTAGCAAATAGTTGTTCTAT  | 17735 - | TGG | 128 | 76  |
| TTTGCCGATTAATTCCGCTC  | 26324 - | CGG | 67  | 131 |
| ATCTATTAGTTTACATAGAA  | 22678 - | TGG | 69  | 129 |
| CTTATATTGGGTTAAATCAC  | 38946 + | AGG | 18  | 175 |
| GCGTGTTTGATAACCTTTTT  | 36487 - | AGG | 80  | 119 |
| AAGGTAATTCAACAACAAAT  | 32258 + | TGG | 126 | 77  |
| GAAATGTACGAGATGGAAGG  | 10559 + | AGG | 110 | 91  |
| GACTACTTTGTGCGCAGCAT  | 26363 - | TGG | 83  | 115 |
| TGATGAGGAACTTCGCGGAA  | 33575 + | TGG | 66  | 130 |
| GGCTTATTGGTGGTCAGGAT  | 23358 + | AGG | 48  | 145 |
| AGATCGAGTCAAGGAGGTTT  | 12421 + | TGG | 20  | 170 |
| TGAATCATCACATTTATTGG  | 11327 + | AGG | 156 | 47  |
| TTTATAGCGTTGACCAAAC   | 34719 + | TGG | 179 | 26  |
| TTTTCAATATCAACTATGAA  | 10483 - | GGG | 129 | 71  |
| TATTGGGCAGGCGTACCGAT  | 29216 + | AGG | 54  | 137 |
| TTTAATATCAGTTGTTACAA  | 39 +    | AGG | 5   | 181 |
| ATTATCGACGATGTTGTAAA  | 36461 + | AGG | 6   | 179 |
| GGTAGAATCTTTAGTATTGT  | 21212 + | AGG | 61  | 129 |
| AATGAATTTTTAAAACATTC  | 31819 + | AGG | 116 | 79  |
| TTAACAACTAGTTGATGAT   | 21790 + | AGG | 45  | 142 |
| CACAAATTATTTTTAGATA   | 27700 + | AGG | 148 | 49  |
| GTCAAGCGCCACAGCCATTT  | 21637 + | TGG | 30  | 155 |
| TAGTAGCCATTAATGCCGAA  | 20016 - | AGG | 9   | 173 |
| TCCATAAACAAATGTAATCT  | 36391 - | AGG | 93  | 97  |
| GGCTATTAGCGCTCTTAAAA  | 24460 + | TGG | 84  | 105 |
| AGCTGGACTTGATAGCGCAA  | 18275 + | TGG | 157 | 38  |
| TCTAGTAATTTACTAGCTAT  | 25204 - | AGG | 47  | 137 |
| TAATACACTTTACTTAATTA  | 37390 + | AGG | 109 | 81  |
| GGTATGTGGGTGTCTGGTGA  | 15720 + | CGG | 113 | 77  |
| CAGCGACGAAAAGAAAATCA  | 8732 +  | TGG | 12  | 168 |
| TTAACAAATTGGTAATGTGCC | 22329 + | TGG | 43  | 140 |
| AATGCCGGAGCGGAATTAAT  | 26336 + | CGG | 40  | 142 |
| CTGAATAGGAGGAGATATGA  | 20445 + | TGG | 105 | 83  |
| GACGAAAGTTATTGGGATTA  | 7648 +  | GGG | 42  | 139 |
| TCAAGTTGTCTATAAATATG  | 11840 + | AGG | 156 | 36  |
| GTTTACATTCAATGACAGGT  | 29652 + | CGG | 76  | 108 |
| TCTGATATAGAGGGTATTGA  | 26899 + | TGG | 38  | 142 |
| GGTTTACCATCATACAAGGA  | 40368 + | TGG | 94  | 91  |
| TAACTTTTTGAAATCTAAAA  | 725 +   | TGG | 4   | 172 |
| GCTACTAAAATCCGAACTTT  | 24248 + | CGG | 61  | 120 |
| AATTTAGGTTCAAGTGATTT  | 37675 + | AGG | 82  | 101 |
| TTCTTTATGATAATATGGAT  | 16126 + | AGG | 64  | 117 |
| TTGCCTTGTTCTTTTTTATA  | 39366 - | AGG | 26  | 151 |
| TTTAGAACGATAAAAAGAAAG | 6907 +  | TGG | 119 | 67  |
| ACCAATGCTCGGGATGGTCA  | 15529 - | GGG | 58  | 121 |

|                       |         |     |     |     |
|-----------------------|---------|-----|-----|-----|
| AACGGTAAAGGTTGGACTAA  | 38530 + | TGG | 151 | 37  |
| ACCTCGTGACCTTTTTTCGTT | 29533 - | AGG | 116 | 68  |
| TATGCAATATACGTTGAATA  | 21519 + | CGG | 138 | 47  |
| TCTATCAATAAATTGTCCGT  | 30182 - | TGG | 67  | 111 |
| CTATCAATAAATTGTCCGTT  | 30181 - | GGG | 26  | 148 |
| ATAACAATTGCTTGTTGGTC  | 12249 - | GGG | 74  | 104 |
| ACAAGGTATTATGAGTGGAG  | 18152 + | AGG | 134 | 49  |
| GGTACTGGTATATATGCTAC  | 21540 + | TGG | 124 | 58  |
| TTAGTTAGAACTTTGGTAC   | 31460 + | TGG | 144 | 39  |
| CTCAACCGACGGTTAAAATT  | 37323 + | TGG | 13  | 157 |
| AAGTTATGAGGGTTATTTAT  | 32862 + | CGG | 66  | 109 |
| GTTAGCACTAATGGGTGATT  | 20227 + | GGG | 39  | 133 |
| AAGAGTCAGTGCTTCGGCAC  | 34328 + | TGG | 41  | 131 |
| GGTCAAAACTGGAACGGTAA  | 38518 + | AGG | 167 | 17  |
| ACAGTTTCAGGACCCCAACC  | 38547 - | AGG | 69  | 105 |
| GCTTTACTAAGAACTATTTT  | 34216 + | TGG | 39  | 132 |
| TCTATTGTGTTAATAGGACG  | 15858 + | AGG | 42  | 129 |
| TGAAGCAGTAGGGATTATGA  | 11816 + | CGG | 145 | 36  |
| ATATCGCTGAGAAAATAAAA  | 3882 +  | AGG | 3   | 164 |
| ATCTTCGCGCAACAGGTCAA  | 24275 + | AGG | 57  | 114 |
| CTAATTTTGTTAGCAGTATT  | 26082 + | TGG | 27  | 141 |
| CCACACTATTAGCCCAATTT  | 24876 - | TGG | 38  | 131 |
| GAAATCAACAGAATTATTGA  | 1024 +  | CGG | 182 | 1   |
| ATTGACGCTTTGCAAGAAGT  | 16919 + | TGG | 111 | 65  |
| AATTTCTGTCCGCAAAACGC  | 31220 + | CGG | 19  | 148 |
| GGATTTAACTAGAATAACTG  | 25432 + | GGG | 41  | 128 |
| CATATCGCCTATATACACAG  | 13359 + | TGG | 75  | 97  |
| ACAGCAATAGAGTACGTACA  | 7990 +  | AGG | 56  | 114 |
| TATTCGACTAAAGGTAAGAG  | 14663 + | TGG | 58  | 112 |
| AAAGACTTTAAAGGTATTGC  | 31352 + | AGG | 86  | 86  |
| GAAACTCATAGATGAGGCAC  | 8507 +  | AGG | 22  | 142 |
| ACTGGATAGACAAATGTCTA  | 35617 + | GGG | 53  | 114 |
| TTTCTTTTCGTCGCTGAAAT  | 8709 -  | GGG | 160 | 17  |
| AGCCCAATTTTGAAAAGCTA  | 24866 - | TGG | 80  | 89  |
| AGTTAGTACAGAAGATTTTG  | 37174 + | AGG | 144 | 31  |
| TAGCTCCTGCACAAGATGTA  | 14491 + | GGG | 117 | 55  |
| TTAGGTA AACATCAGGTTC  | 33280 + | TGG | 67  | 100 |
| CGTATTGTTGTACCACTCAT  | 29338 - | AGG | 92  | 77  |
| AAAGTAATTGCTACAGACTT  | 26510 + | TGG | 65  | 100 |
| AGCTTTTAGGAAAGCGAGCA  | 29512 + | TGG | 50  | 113 |
| AGGCCTTTGAAGAATATGAG  | 14796 + | TGG | 82  | 84  |
| AGCGTTGGCAATAAAGCTAA  | 38653 + | AGG | 115 | 54  |
| ATTATCGGGGCAGTCAATGT  | 34476 + | TGG | 33  | 128 |
| GAGGCCATGTATCTGACTGT  | 40047 + | TGG | 78  | 87  |
| ATAAGTGCTAGTGCGTATAA  | 11667 + | CGG | 109 | 59  |



|                      |         |     |     |     |
|----------------------|---------|-----|-----|-----|
| CAATATTAGAAAATAAAGTG | 19509 + | AGG | 7   | 151 |
| TAGCTTAGGTAAAGGTTTAG | 26476 + | CGG | 102 | 65  |
| CCCTGGCAACGGAATAGGTT | 34651 + | CGG | 128 | 41  |
| GGTACTAATCCGGCAATCAC | 24313 - | TGG | 68  | 95  |
| AGATAGTTTTAAAAAAGCAA | 28477 + | TGG | 145 | 24  |
| CTTGCTCTTTTGGTTGCAAT | 30024 - | CGG | 67  | 94  |
| AAAACGACTAATCTTGCAAG | 29066 + | AGG | 160 | 10  |
| ACTGCATACGGTGTTAATGT | 38905 + | AGG | 99  | 64  |
| ATTATGAGAAAAGAAGTAAA | 24158 + | TGG | 3   | 150 |
| CAACTGCCATTGTGATGAGG | 2565 -  | AGG | 5   | 148 |
| AGTGGTATAGGAGCTATACG | 15408 + | TGG | 53  | 103 |
| GACGGTGCATATTGTATTAA | 39505 + | TGG | 37  | 117 |
| TTTTTAATTTAACACAAAGT | 33916 + | AGG | 104 | 56  |
| TCAACTTTAGTAATCCTTCA | 37736 + | GGG | 56  | 99  |
| AACCTGGAGACATCGCAGTT | 34626 + | TGG | 15  | 136 |
| AGTTCGGATTTTAGTAGCTA | 24227 - | AGG | 129 | 33  |
| GGAAAAACGGAAAACCGAAA | 7246 +  | AGG | 103 | 56  |
| TTGAAACTGGTGAAATGTA  | 16467 + | AGG | 65  | 90  |
| GCCAGGCAATGTTATTTTAT | 19561 + | CGG | 153 | 10  |
| ATACCTTGTTACGCGGTA   | 17095 + | TGG | 125 | 35  |
| AAAGAATGGTCATGAGGATA | 9990 +  | TGG | 46  | 106 |
| CCTAAGATTGGTCAGATATT | 24965 + | TGG | 16  | 133 |
| TAACCTTATCCACATAAAGG | 6707 +  | TGG | 131 | 29  |
| CTTTAACCGCCATTTTAGCG | 23979 - | GGG | 90  | 66  |
| ATTATTTAGTGTACTTTTT  | 13049 - | CGG | 80  | 75  |
| AGGCTTACCATGAATCGCAC | 39247 - | CGG | 44  | 107 |
| ACAATGGCAACAGTTCCAAT | 29096 + | AGG | 20  | 128 |
| TTTCAATATCAACTATGAAG | 10482 - | GGG | 134 | 25  |
| GCGATGTCAGCAGGTATCAG | 24599 + | AGG | 73  | 80  |
| TGCATTACTGCATTTGTATA | 30073 - | TGG | 60  | 91  |
| CGGTGCTAGCTTCGTAAGAA | 36052 + | AGG | 5   | 140 |
| ATCTTTGCTTTATTATCAAA | 38334 - | CGG | 129 | 28  |
| TGGAGTGTGGCTGAAAAAAT | 26138 + | GGG | 18  | 128 |
| ACAGTTGAATACGAAAAATT | 22605 + | CGG | 126 | 30  |
| CAAAGTCGAATATTGGTAAG | 34440 + | AGG | 87  | 65  |
| ATACTGCTTACTATCGATA  | 22021 - | CGG | 118 | 37  |
| GCTTCAATTCCTTTATCTCC | 22331 - | AGG | 108 | 46  |
| AGGCTCAATAAAATGTTGAA | 5832 +  | AGG | 78  | 73  |
| AAAACCTGGGAACTTGCTTT | 6720 -  | TGG | 141 | 15  |
| TGGTTACACGGTTATTGGGC | 29204 + | AGG | 26  | 117 |
| TCCGAAAATGGCATTTCGGT | 7173 -  | TGG | 57  | 89  |
| ACTAATTTACAGAAATGTT  | 29027 + | AGG | 143 | 11  |
| GCAACAATGAGAGAAACAGT | 21894 + | CGG | 95  | 54  |
| AAAACGGATTATCGGCAAAC | 7211 +  | GGG | 102 | 47  |
| AAACATCCAGTGACATGCTT | 39870 - | GGG | 96  | 52  |

|                      |         |     |     |     |
|----------------------|---------|-----|-----|-----|
| ATATATGCTACTGGTCCTGG | 21549 + | TGG | 77  | 69  |
| GCGAGTACGTTTGACGCAAT | 27845 + | AGG | 58  | 86  |
| AGTCACAGGTGTAATGCTTG | 33892 + | AGG | 133 | 18  |
| CCTTGCAATATTAATGATTT | 8013 -  | TGG | 99  | 48  |
| ACCGTTAAAGAATGGTCATG | 9984 +  | AGG | 8   | 130 |
| AACCGCAACTGTGTAATATG | 5622 +  | CGG | 15  | 123 |
| CGTGTACGTTAGAGAATGAC | 40347 + | CGG | 28  | 110 |
| GTGTCGTACACTTATAACGA | 20865 + | TGG | 42  | 97  |
| GGAATATCAGGAGTCAATAG | 37696 + | CGG | 66  | 75  |
| ATCGGTGTTATCGGTATTTT | 25310 + | AGG | 46  | 93  |
| ATCAATATCGCAAATGTTGA | 36959 + | AGG | 17  | 119 |
| TTCTGGGCGTGCTTCTGGTT | 34287 + | TGG | 50  | 89  |
| CTACAAACGAAGGTGATAAG | 27335 + | AGG | 80  | 61  |
| AATATTGCCTAAGCATATTG | 16324 + | AGG | 26  | 109 |
| AATGAATTGATAAAAAAGAA | 9497 +  | CGG | 1   | 131 |
| GCAACAACATAAGATGACAG | 32727 + | AGG | 33  | 101 |
| TCAACTAGTTTGTTAATGTT | 21767 - | AGG | 47  | 88  |
| GTTGTAGCTTTTCTAGCTTT | 1646 -  | AGG | 71  | 66  |
| GGCTTGAGAGAGCAAATAAA | 13999 + | AGG | 73  | 64  |
| TCTCTATCGACATATAAATG | 35104 - | CGG | 23  | 109 |
| AGAGAACTTGTATTGAACAA | 12980 + | AGG | 102 | 37  |
| AGAAGTAAAAGATTATCTAA | 18990 + | AGG | 84  | 52  |
| AAAATCTCATAATGGGGCT  | 35650 + | GGG | 36  | 95  |
| TATTTTAGGTGGCGTATTTT | 25324 + | GGG | 24  | 105 |
| AACCGTTTTATATCCAGGC  | 27632 + | TGG | 47  | 83  |
| GTCCGCAAACGCCGTTAT   | 31227 + | TGG | 21  | 106 |
| CAGTCGTGTTGCTTGGAGTG | 26125 + | TGG | 22  | 105 |
| CAAGGTATCACTTATGATGC | 30605 + | AGG | 84  | 49  |
| TTACTGCCAAAAGTGTTTC  | 7542 -  | TGG | 31  | 96  |
| GACTTTTCATCTTTTGCCTC | 33857 - | TGG | 53  | 76  |
| AATTAAGTGGTACGTAGACA | 33803 + | TGG | 13  | 112 |
| ACTAGCCAATTAGGGTGACG | 35164 - | CGG | 65  | 65  |
| TTATCCACGAGTCATGCAAG | 5782 -  | TGG | 56  | 73  |
| AACTGATTAAGTGTGTTAA  | 27399 - | AGG | 59  | 69  |
| TTTGAAGCATTGAATAGCAT | 24740 + | AGG | 49  | 77  |
| AAGCTCATTTTAAGCGCGAT | 21963 + | AGG | 70  | 58  |
| TCAATATCGCAAATGTTGAA | 36960 + | GGG | 40  | 85  |
| AAAAGGTATCTACTTCACAA | 36196 + | GGG | 42  | 83  |
| ACTTTAAAGGTATTGCAGGT | 31356 + | TGG | 50  | 75  |
| GTTGGTGGTACTATGATTTT | 2793 -  | TGG | 41  | 83  |
| TCACACTTATTGAGGAGCAT | 12817 + | GGG | 65  | 61  |
| TGAACTATATAGCCGGGCAG | 40028 + | AGG | 6   | 114 |
| AAAAGATTATGGCTTATATT | 38934 + | GGG | 78  | 49  |
| GATAGATTGCCTACAAACGA | 27325 + | AGG | 40  | 83  |
| AACGATAAAAACGAAGTTAT | 33366 + | CGG | 74  | 52  |

|                       |         |     |     |     |
|-----------------------|---------|-----|-----|-----|
| ACAGCAAATGGACAATAAA   | 37579 + | TGG | 85  | 42  |
| ATAGGGGTAAGTATTGGACC  | 30827 + | TGG | 44  | 79  |
| TTCGCGAGTAAAGTAGCTGA  | 26231 + | TGG | 128 | 3   |
| GACTATTACTGTTACAAAGA  | 20508 + | AGG | 15  | 105 |
| TCCTCGCTTTTGGCCATATT  | 23150 - | CGG | 39  | 83  |
| TCACTTACTACCTGCCTATA  | 14405 + | TGG | 34  | 87  |
| ATTGAAATGAGGTGCATACA  | 34363 + | TGG | 19  | 100 |
| GTGCCTATATCCGTCTTTTC  | 32388 - | TGG | 35  | 85  |
| TATGCACTTTTCGGACTGTT  | 18886 + | AGG | 50  | 71  |
| GATGATGAGGATTCTGAAAT  | 16664 + | AGG | 42  | 77  |
| CTGTAGGCTTTCTAGTCTTT  | 34380 - | GGG | 30  | 87  |
| AGGAGACTTCCAAGAAGCTG  | 30757 + | AGG | 104 | 20  |
| TGTTTACCCATATATTGTTG  | 21839 + | TGG | 3   | 111 |
| GTTGGCGCATTCTCTGTCGC  | 24410 + | AGG | 8   | 106 |
| AGTCGTTTTAAATTATTCAA  | 37792 - | TGG | 91  | 31  |
| ATACTCCACTAATGTAATCA  | 20875 - | GGG | 71  | 49  |
| TATTGGGGTTTTGTAAACATG | 34526 + | GGG | 31  | 85  |
| TATCTGACTGTTGGTCCCAC  | 40056 + | AGG | 24  | 91  |
| CAATGAATGTTAAGCGAATA  | 35703 + | TGG | 28  | 87  |
| TTTGACAAGTATGTTCAAAA  | 19381 + | AGG | 8   | 105 |
| ACGACTAATCTTGCAAGAGG  | 29069 + | TGG | 83  | 37  |
| ATACAAGCTAGGTTAAAAGT  | 13537 + | AGG | 43  | 73  |
| TAAAGTGAGGTAATAAAAATA | 19522 + | TGG | 105 | 17  |
| GCAGTTTGGCACCTGGCAA   | 34640 + | CGG | 27  | 86  |
| TTTGAGCTTGATTATGTTGA  | 27136 + | TGG | 48  | 67  |
| AGGAAAGCGAGCATGGAGGA  | 29519 + | CGG | 38  | 76  |
| ATGATTGGTTACACGGTTAT  | 29199 + | TGG | 51  | 64  |
| ATTGAAAATGATTTAGTTAG  | 31918 + | TGG | 52  | 63  |
| ATCACCATAACCTTTAATAA  | 28319 - | AGG | 43  | 71  |
| AACTTCGCTAATGGTAGATA  | 35924 + | CGG | 33  | 80  |
| ACGATAGTAGACGCAATTAA  | 31774 + | TGG | 7   | 103 |
| TAAAAAGTCTACAGGGTGTA  | 27744 + | GGG | 18  | 93  |
| ACAGGAGAGGTAGACAAGGC  | 39580 + | AGG | 49  | 65  |
| AGAGAATTACAAGGAAATCA  | 23225 + | TGG | 50  | 64  |
| TACGGATATCACTGTTCCCTA | 25817 - | TGG | 71  | 45  |
| ATAAGAAAAACAACGGAGCA  | 31197 + | TGG | 30  | 82  |
| GATAATTTTGTAATATTCTT  | 31243 - | AGG | 10  | 100 |
| GGTTAAACCTCTAATTGCAG  | 19870 + | AGG | 24  | 87  |
| TGTAACATGGGGCAATGCTA  | 34537 + | AGG | 25  | 86  |
| AACTTTGGTACTGGTGGCGT  | 31469 + | TGG | 33  | 78  |
| TTTGTGCTAGGACTCATAGA  | 14606 + | GGG | 13  | 96  |
| CTACGTTCAATAAATGTGAA  | 14455 - | AGG | 75  | 40  |
| GGTTTTTCGTCTGATGGAGT  | 35536 - | AGG | 26  | 84  |
| ACTGGGTTAATTCTAATAGT  | 34737 + | TGG | 41  | 70  |
| AAAATCGGAAGGTTTCCGGA  | 14721 + | AGG | 44  | 67  |

|                       |         |     |    |     |
|-----------------------|---------|-----|----|-----|
| CGCACGCAAGTTTGAGGATT  | 24688 + | GGG | 36 | 74  |
| ATCAACGGTATGTGGGTGTC  | 15714 + | TGG | 29 | 80  |
| AAAGAAGATTTTGAAACTGG  | 16457 + | TGG | 5  | 101 |
| GTATCTGAAGTGATTCCAT   | 30556 - | AGG | 72 | 40  |
| TCGAAACCTTGTAAGTAGTT  | 30652 - | AGG | 24 | 83  |
| TGCGCACAAAGTAGTCAGCG  | 26386 + | CGG | 78 | 34  |
| TGTTTTGTTAGTTTTCAGTT  | 33669 - | CGG | 31 | 76  |
| CGATTAGAAATCTTTAAAAA  | 28160 + | AGG | 2  | 102 |
| AAACTACCCACCATATAGGC  | 14399 - | AGG | 58 | 51  |
| GGAGACCTAATCATATTACA  | 29168 + | AGG | 58 | 51  |
| CATAAGATGACAGAGGCGAA  | 32734 + | TGG | 58 | 51  |
| GTAATATCACTTAGATATGC  | 30961 - | TGG | 49 | 59  |
| GATTGGTTAACTCAATTGTG  | 25655 + | GGG | 65 | 44  |
| TGATGGAGTAGGGCCTCGTG  | 35525 - | TGG | 24 | 81  |
| ATAAAAATGAGCAAATTAAG  | 33790 + | TGG | 25 | 80  |
| TGGGTGTGCTTCGAATAGTT  | 25256 - | TGG | 40 | 66  |
| CCCCTATCGTCAATATTA    | 8589 +  | AGG | 63 | 45  |
| GCTTAGTACAAGCTTCTAAG  | 23427 + | AGG | 43 | 63  |
| ATACTCAAAGTAATCATTTT  | 11235 - | CGG | 64 | 44  |
| GACTGGGGTTACGAGCACTA  | 15834 + | TGG | 69 | 39  |
| TCGAGCAGTATTTTTCATAG  | 21691 + | AGG | 93 | 17  |
| GAAAAATTCGGCGAAAAAGT  | 22617 + | CGG | 1  | 100 |
| TTGTTAGGTACACCAAACAA  | 16954 - | TGG | 40 | 64  |
| TTTATAAAAAAATTGAAAAG  | 22742 + | AGG | 96 | 13  |
| ATGCCTATATTACAAGTATT  | 25706 + | AGG | 23 | 78  |
| ATGCAGTAATGCAATCATTT  | 30099 + | TGG | 65 | 40  |
| ACAAGGAAGATGTCTCCTGT  | 40055 - | GGG | 35 | 67  |
| TAACAAAACAATACTGAGG   | 33698 + | GGG | 67 | 38  |
| ATTGAACAAAGCACCGAATA  | 23153 + | TGG | 39 | 63  |
| TTATTAATAACTATTTGGA   | 39694 + | TGG | 20 | 79  |
| ACCCTGACCATCCCAGCAT   | 15544 + | TGG | 23 | 76  |
| CGTTAGCACTAATGGGTGAT  | 20226 + | TGG | 6  | 91  |
| TTACTACCTGCCTATATGGT  | 14409 + | GGG | 38 | 62  |
| AGTTTCTATGAATCAGATAG  | 31615 + | AGG | 26 | 72  |
| GGAGCAGTTAAACGTTCTTT  | 24122 + | CGG | 42 | 57  |
| TTTGTAACAACCTGATATTAA | 21 -    | AGG | 23 | 74  |
| TCTCAGAAGATAGCGAAGAT  | 22879 + | GGG | 51 | 48  |
| CAAACCTAGGGTAACTTGT   | 29398 + | AGG | 10 | 85  |
| TGGAGTTTTAAAGGTGATGA  | 21594 + | CGG | 68 | 32  |
| GCTTAAACCAACTGAATAGG  | 20434 + | AGG | 20 | 75  |
| GGAACAGCAGACGCAGGAAA  | 12379 + | AGG | 33 | 63  |
| TGGGTAATAGACATCAAAAA  | 6015 -  | AGG | 96 | 6   |
| CCTGGTGCAAAAGGTGAAGC  | 36809 + | AGG | 28 | 67  |
| GACGCGGTATTGATAATAC   | 29897 + | AGG | 71 | 28  |
| CAAAAAGTGTCTGTGCTA    | 7535 -  | AGG | 62 | 36  |

|                       |         |     |    |    |
|-----------------------|---------|-----|----|----|
| TGTAACTAATAGATCAAGG   | 22702 + | GGG | 93 | 8  |
| AAATGATTCTGACATTGCAT  | 22287 - | TGG | 44 | 52 |
| CGTTTTTTTGGGGCAAAAAA  | 40234 + | AGG | 3  | 89 |
| TTAGCTATTGGTAAGTCGTA  | 21151 - | AGG | 59 | 38 |
| AAAGATATTGTAAGTAGATA  | 15957 + | TGG | 51 | 45 |
| ACTGCGATGTCTCCAGGTTT  | 34606 - | CGG | 23 | 70 |
| ATCATTCTGATTGGTTATTT  | 17670 - | TGG | 13 | 79 |
| ATTACACAAGGTATTATGAG  | 18147 + | TGG | 44 | 51 |
| TTGATGACCTTAACAATTCT  | 28002 + | AGG | 5  | 86 |
| ATTATTGAAGGCGCATCAAA  | 6762 -  | AGG | 89 | 10 |
| GTCAGTTGTATGAAAATATA  | 12617 + | AGG | 91 | 8  |
| AATGGCGCTGACCTTGTTAA  | 32239 + | AGG | 20 | 72 |
| AAACAAAACGGTATAAACAT  | 2288 +  | CGG | 4  | 86 |
| ATCGGATTCGTTAATACTGG  | 33384 + | CGG | 46 | 48 |
| ACACGTGTTGGTTATTTACA  | 16550 + | TGG | 35 | 57 |
| TTGAACTTGATGAAGCAGTA  | 11806 + | GGG | 26 | 65 |
| TCATTTTATGGCAAAGATTA  | 23620 + | TGG | 78 | 18 |
| TGATTTCTTAAATGCCGGAG  | 26326 + | CGG | 58 | 36 |
| TAAAGTTACATTACAGCCCC  | 6035 -  | TGG | 8  | 81 |
| ACTGTTCTATGAAAGTTGCA  | 5488 +  | AGG | 46 | 46 |
| ATTGACTTTAAATATTTTGA  | 21462 + | TGG | 40 | 51 |
| CAACGTCGTTATATAGCGAC  | 39562 + | AGG | 61 | 32 |
| GATGAGCTTATTGGGGATAT  | 11447 + | AGG | 45 | 46 |
| AAAGGTGATAAAGGCGAACC  | 36782 + | GGG | 45 | 45 |
| AGTAGATTTAAAGGTGCGAA  | 36764 + | AGG | 67 | 25 |
| GTTGAAGGCGCAGAAGAGAA  | 19973 + | AGG | 70 | 22 |
| AGGTAGCGTTGAAAGTTATG  | 32850 + | AGG | 3  | 82 |
| ATGGGGCAATGCTAAGGATA  | 34543 + | TGG | 34 | 54 |
| GCAAGCGACTACAAAAAAG   | 38685 + | AGG | 37 | 51 |
| GACGGTGGCGCAAATGGTGT  | 33025 + | AGG | 38 | 50 |
| AGCCATACAATCCAGCTTTT  | 29499 + | AGG | 18 | 68 |
| TCGCCTCTATATGTGTTTTT  | 2817 -  | TGG | 29 | 58 |
| ATACTTTGCTGGTGTGCGACT | 15818 + | GGG | 29 | 58 |
| GAAAGATTACGGCGAGAAAA  | 24217 + | TGG | 87 | 5  |
| TTTAAATTCTTTTTAACTTC  | 20807 - | AGG | 46 | 42 |
| AGGCATTCTTTACACAAAAC  | 31856 + | GGG | 16 | 69 |
| GCAAACGTCATTGCATAATC  | 35971 - | AGG | 65 | 24 |
| GTAGTTGACTCAGACGGCAA  | 33181 + | CGG | 38 | 48 |
| GTAGCTGTCCAAATCATAGT  | 25853 + | AGG | 41 | 45 |
| AAACGACGTATCGATATTGG  | 30716 + | CGG | 46 | 40 |
| ATTACAGTTTTTACGACTAA  | 29598 + | AGG | 9  | 73 |
| GACTTGAATCGATTCCAGCC  | 27630 - | TGG | 18 | 64 |
| TTATCGGGGCAGTCAATGTT  | 34477 + | GGG | 18 | 64 |
| TTGCGATAGCGTATGCTAGG  | 8057 -  | TGG | 30 | 53 |
| TCCGCTCCAGTATAAGATAG  | 20167 - | TGG | 30 | 53 |

|                       |         |     |    |    |
|-----------------------|---------|-----|----|----|
| GATTTAGTTAGTGGGTTTGA  | 31927 + | TGG | 26 | 56 |
| ATATTTAAGATGGAAGTTGA  | 20685 + | CGG | 37 | 46 |
| GGTGTCACTACTTCTTTAAT  | 38104 - | AGG | 32 | 50 |
| CCACTAGTTGAAGTGTGTA   | 19924 - | AGG | 22 | 59 |
| AATCTGGAAAGATGGGGAGT  | 10693 + | TGG | 23 | 58 |
| CGGATATTTATTTTTAGGTA  | 37522 - | AGG | 14 | 66 |
| GATAATCCGTTTTCCGAAAA  | 7185 -  | TGG | 25 | 56 |
| TTCCGCATATTACACAGTTG  | 5608 -  | CGG | 36 | 46 |
| TCCTTAATATTCGACGATAG  | 8574 -  | CGG | 13 | 66 |
| CAAGTGCTAATTAACCTGAA  | 17522 + | GGG | 24 | 56 |
| CAACTAGTTTGTTAATGTTA  | 21766 - | GGG | 30 | 50 |
| AATAGGTGATGTTGTTAGAG  | 28585 + | TGG | 52 | 30 |
| TTAATCGGCAAAGTAGCTGA  | 26351 + | GGG | 34 | 46 |
| GTATCGATGACTGATTCAGG  | 30926 + | CGG | 43 | 37 |
| ACAATTGCGTTCCAAGCCAT  | 25817 + | AGG | 23 | 55 |
| GAGCCTTTATTTATATGAAA  | 17984 + | TGG | 76 | 7  |
| GTACTIONACAGAAACAGCAC | 31133 + | AGG | 28 | 50 |
| AAAGGTAATAATGTAAGAGA  | 39424 + | CGG | 21 | 56 |
| TTGCTAGTATCTTTTGAATA  | 34807 - | TGG | 74 | 8  |
| GCATCTAAATTCGAGGGATT  | 28124 + | AGG | 23 | 54 |
| ACGCAAAGCGCTTTAATAG   | 30811 + | GGG | 22 | 54 |
| GTTAACTTAAATAATGCGCA  | 32770 + | AGG | 23 | 53 |
| GAATATACAAAAGTATATGC  | 37471 + | TGG | 54 | 25 |
| AATCAATTCTTAGCGAATAA  | 37925 + | AGG | 3  | 71 |
| CTTCAATAACTAGCCAATTA  | 35172 - | GGG | 6  | 68 |
| TGAGACACAAATTTGAACAA  | 24826 - | CGG | 27 | 49 |
| TGGCACCCCTGGCAACGGAAT | 34646 + | AGG | 7  | 67 |
| CTTAATGCGGTTGGTGTATT  | 24368 + | AGG | 32 | 44 |
| TTAAATACTTTCACATCATT  | 38497 + | TGG | 32 | 44 |
| GTTGCAAAAAGAGTACGTGG  | 9536 +  | TGG | 36 | 40 |
| AGCTAGTGAAGTGGTGGAGT  | 34417 + | GGG | 27 | 48 |
| ATTCTAGGCCATAACGGCGA  | 29858 + | CGG | 24 | 50 |
| TACTTTGCTGGTGTGACTG   | 15819 + | GGG | 5  | 67 |
| TTAGTAAACCTGTCTATATC  | 22046 - | AGG | 47 | 29 |
| CATTATTGCAGGTAATAATC  | 24323 - | CGG | 28 | 46 |
| CCAAAATTGGGCTAATAGTG  | 24892 + | TGG | 12 | 60 |
| TCCAAGTGATTATAAGTGAA  | 26814 - | AGG | 43 | 32 |
| GCGCTTAACAAAATACTTAA  | 35789 + | AGG | 43 | 32 |
| TCTGTAACCTTCATTCGTAAG | 26438 + | TGG | 34 | 40 |
| ACGCACGCAAGTTTGAGGAT  | 24687 + | TGG | 6  | 65 |
| TCTATCTACGTTATAATCAT  | 31711 - | CGG | 11 | 60 |
| AGACAAAAGTATTGTATCAA  | 30544 + | TGG | 32 | 41 |
| ATTATGCTTGTAGCCGGTCA  | 38728 + | TGG | 13 | 58 |
| AAGATAACTTGCCGAAAGAG  | 22561 + | TGG | 46 | 28 |
| CAAAAGGTGTAGGCGCCTAC  | 19716 + | TGG | 37 | 36 |

|                      |         |     |    |    |
|----------------------|---------|-----|----|----|
| TGGTAACTTTTATTTTATTG | 15887 + | AGG | 7  | 63 |
| AGGATCGTTATAACCATGAC | 38725 - | CGG | 31 | 41 |
| TTCTTAGAGTTATTGAAGAA | 14094 + | AGG | 21 | 49 |
| GAATTCGTTGAACTTTGTTG | 30490 + | AGG | 44 | 28 |
| AAACGAAGGAGTGATTAATA | 22130 + | TGG | 36 | 35 |
| TGGCGACTTCTCAGGTGCTT | 25906 + | GGG | 16 | 53 |
| GGATTCAATGTTATATTTAA | 22920 + | CGG | 52 | 20 |
| CTCTAAACGCTTTCGGTAAC | 31038 - | GGG | 11 | 57 |
| GTATAACCTGCTGGCACTGG | 39324 - | TGG | 6  | 61 |
| AGCGTCGTTAGCGCATGAAG | 15461 + | AGG | 40 | 30 |
| AAGGAAGTTGATTTAAAAGC | 27532 + | CGG | 55 | 16 |
| AGAAGTAAAATCGAATACAC | 31384 + | CGG | 47 | 23 |
| GCTCAAATTATCGGTGTTAT | 25301 + | CGG | 52 | 18 |
| TGGACGATCACTCATGTTGA | 27884 + | AGG | 23 | 44 |
| ATGGTTGCAAAAAGAGTACG | 9533 +  | TGG | 15 | 51 |
| ACATGTCTTGTCACAGTTTC | 38559 - | AGG | 19 | 47 |
| TTGAATCGCGTTAGGTAATG | 33127 - | CGG | 9  | 56 |
| TATTATGTACGAGTTAATCA | 29572 + | AGG | 22 | 44 |
| CTATGTAAACTAATAGATCA | 22699 + | AGG | 14 | 51 |
| CATCACTCAATTTATTCCAT | 30860 + | CGG | 4  | 60 |
| TGCGCTTAAAACGCTATCTA | 32320 - | TGG | 35 | 32 |
| TAAAAATAACTTTTATTAGA | 34684 - | TGG | 5  | 58 |
| GTGGTGTTTGGTTATTGTCA | 35274 + | GGG | 21 | 43 |
| AATGGAACAAGTGATATTTG | 24176 + | GGG | 13 | 50 |
| TCTATGCTTGCAGTTTGGAA | 10848 - | CGG | 26 | 38 |
| TAACGCGCTAGGTAAAGCGC | 19269 + | AGG | 26 | 38 |
| GTGACGCGGGTCATCAAAAT | 35150 - | TGG | 26 | 38 |
| TCAACGCTACCTGGTAAATC | 32823 - | CGG | 29 | 35 |
| ATGGATCCTATTTTAGGTAA | 6795 -  | AGG | 19 | 44 |
| TGTCCATAGCTTCCAAAAT  | 24879 + | TGG | 3  | 58 |
| GGTTTTATTACAAAAGATGA | 37500 - | AGG | 35 | 29 |
| GTTGACAGTGCGTCCACACG | 35528 + | AGG | 15 | 47 |
| TAACTTCTCAATTTAGAGCA | 25068 + | TGG | 57 | 9  |
| GATAGATTGCTTGTTAAAAA | 30215 + | CGG | 7  | 54 |
| CAAGGCGCACCCGGTAAAAA | 36845 + | CGG | 10 | 51 |
| TTAAGCGTTGCGAACGCTTC | 20401 - | TGG | 13 | 48 |
| AAACCAACGTTTAATGATTG | 4199 +  | GGG | 55 | 10 |
| ATGTTCTTTATGTTAGCGAC | 38293 + | AGG | 14 | 47 |
| ACCAGCTTTAATGTAATAAT | 28247 - | TGG | 26 | 36 |
| TTAGCTGACATGTTGGCGTT | 12076 + | TGG | 29 | 33 |
| GTGCTAACAATTCATGTTCA | 23295 - | GGG | 21 | 40 |
| GAAGTTTCAACTTATTATAA | 26736 + | GGG | 11 | 49 |
| ATCAACTTTAGTAATCCTTC | 37735 + | AGG | 34 | 28 |
| ACTGATGATGATTGGTTACA | 29192 + | CGG | 16 | 44 |
| GGAGATAAAATAATCTTCGA | 27553 + | CGG | 58 | 6  |

|                       |         |     |    |    |
|-----------------------|---------|-----|----|----|
| ACTTCATTCGTAAGTGGACA  | 26444 + | CGG | 9  | 50 |
| TTACAACATCGTCGATAATA  | 36441 - | AGG | 52 | 11 |
| GGAAAGCATATATTGACGCA  | 14640 + | GGG | 11 | 48 |
| ATGACGTTTGTAAAAATAA   | 35999 + | AGG | 59 | 4  |
| GGTGTCCCTGATTACATTAG  | 20886 + | TGG | 19 | 40 |
| ATCGCTATTGCGTTAGATTG  | 6828 -  | GGG | 22 | 37 |
| TCGTAAC TATTCTGATATAG | 26889 + | AGG | 54 | 8  |
| ACAATAGTGGTTTTTTCAAG  | 23107 + | AGG | 3  | 54 |
| TCTGGATTTGTACCGGAACC  | 34610 + | TGG | 24 | 35 |
| AACAGATGCGCCAGAAAAGA  | 32394 + | CGG | 15 | 43 |
| GGCGATTTTTCTTCCTAGTT  | 482 +   | CGG | 16 | 42 |
| GCTGTAGGCTTTCTAGTCTT  | 34381 - | TGG | 28 | 31 |
| ATAGCTTCTGGGCGTGCTTC  | 34282 + | TGG | 18 | 40 |
| AGGGGTCCA ACTAGGTGTAA | 11371 + | TGG | 19 | 39 |
| CAACACAAAGAAGTACATCA  | 13390 + | AGG | 9  | 48 |
| CCCATGTATGAGATTTTTTC  | 35628 - | GGG | 23 | 35 |
| ATTGAAGAATTTGATGATAA  | 4433 +  | CGG | 38 | 21 |
| AGGGATATGTTCCAATAAC   | 31223 - | CGG | 31 | 27 |
| TAGGTTATTAATTGAAATTT  | 6291 +  | CGG | 1  | 54 |
| ACGAAAGTTATTGGGATTAG  | 7649 +  | GGG | 32 | 26 |
| TGACACCAATTTCTTCAGAA  | 757 -   | AGG | 3  | 52 |
| AGCAGTTTAAACGACATGCTA | 18841 - | AGG | 24 | 33 |
| TCAATTATCGGCTTTTTAAC  | 25997 + | TGG | 28 | 28 |
| AATGATGAAAGAGAATTACA  | 23216 + | AGG | 50 | 8  |
| AATTGGGCTAATAGTGTGGC  | 24896 + | TGG | 12 | 42 |
| AACGTAATATCAACGGTATG  | 15706 + | TGG | 13 | 41 |
| GAATGTAACGATTAGAAATG  | 26662 + | AGG | 34 | 22 |
| ATAGATGATATTGAAGCACA  | 16301 + | AGG | 21 | 33 |
| CACGGTGGAGGTAGTAGCTT  | 26462 + | AGG | 21 | 33 |
| GGATTTTAGGATATAGCTTC  | 34270 + | TGG | 22 | 32 |
| TATGAATCAGATAGAGGAAC  | 31621 + | TGG | 13 | 40 |
| TCTAATTGTTCTCGAGTTGG  | 22994 - | TGG | 3  | 49 |
| AGACATAAAAAGAAAAACGA  | 22116 + | AGG | 15 | 38 |
| TTTCAATGTTTGGTACAAGT  | 26037 + | TGG | 36 | 19 |
| AGATGCAAACCCCGCTAAAA  | 23986 + | TGG | 10 | 42 |
| ATCACACTTATTGAGGAGCA  | 12816 + | TGG | 16 | 36 |
| AAACTTGGGA ACTTGCTTT  | 6719 -  | GGG | 6  | 45 |
| ATACACTTACTTAATTAAG   | 37392 + | GGG | 19 | 33 |
| ATGAACGACACAAATGATTT  | 38150 + | AGG | 52 | 3  |
| GAATATAACGTTACAGGCGC  | 26860 + | AGG | 22 | 30 |
| GTAAGAATTATCTTAAGACG  | 14303 + | TGG | 37 | 16 |
| TTACAAGCATCAGATGCTTC  | 20318 + | TGG | 38 | 15 |
| CGAAACCTTGTAAGTAGTTA  | 30651 - | GGG | 20 | 31 |
| AGATTGGGGGTGAATAATTA  | 6814 -  | TGG | 33 | 19 |
| GTAAGTGGAACTTATCCAGG  | 33097 + | TGG | 33 | 19 |



|                       |         |     |    |    |
|-----------------------|---------|-----|----|----|
| GTACAAGTTGGTCACAGATA  | 26049 + | TGG | 13 | 37 |
| ATATACGTTGAATACGGTAC  | 21525 + | TGG | 15 | 35 |
| AGATTGGTTAACTCAATTGT  | 25654 + | GGG | 16 | 34 |
| TTATCGCTATTGCGTTAGAT  | 6830 -  | TGG | 29 | 22 |
| AAAGATTTAATAAACGAATT  | 11543 + | TGG | 9  | 40 |
| GTA CTGGTGGCGTTGGTAAA | 31476 + | TGG | 12 | 37 |
| TGCGCCGACACTTATAACAC  | 21477 - | TGG | 27 | 23 |
| GCGCCAGAAAAGACGGATAT  | 32401 + | AGG | 8  | 40 |
| GTTAACACCTCTTTGGCCGA  | 30860 - | TGG | 20 | 29 |
| CGTGGTGTGGTTATTGTC    | 35273 + | AGG | 21 | 28 |
| TTACCTATCAATTGTGCTAA  | 28396 - | TGG | 33 | 17 |
| TAAGGCTTGATATCAAAGCT  | 27969 + | AGG | 5  | 42 |
| TCAGTCTGATTTGATGAGGG  | 13787 + | CGG | 37 | 13 |
| AACAAAATACTTAAAGGAAA  | 35795 + | AGG | 37 | 13 |
| GAAAGGTGATAAAGGCGAAC  | 36781 + | CGG | 19 | 29 |
| GCAGGAGAAAGCGCAAGTGG  | 39004 + | TGG | 41 | 9  |
| TTAAATCAAGTGGGTGTGT   | 18411 + | TGG | 4  | 42 |
| TCAACGGTATTGTTGACGG   | 33010 + | TGG | 15 | 32 |
| TACTATGATTTGGACAGCTA  | 25835 - | CGG | 3  | 42 |
| GGCGATTCTGTAGATCAGGG  | 21233 + | CGG | 15 | 31 |
| TTAGCATATATTGATACGAA  | 16721 + | TGG | 17 | 29 |
| GCATTTATATGTCGATAGAG  | 35122 + | AGG | 18 | 28 |
| ACCACTATCTTATACTGGAG  | 20182 + | CGG | 9  | 36 |
| AAATGTTATACCTTTATTAA  | 28325 + | AGG | 27 | 19 |
| CTCTACCTTATTGATTTAAA  | 20927 - | CGG | 29 | 17 |
| GGGATTACTAAAAGAGATTG  | 11702 + | AGG | 32 | 14 |
| AATGGTTACGAGTATAAAGA  | 7816 +  | CGG | 27 | 18 |
| AATAATGCGCAAGGCGATTT  | 32779 + | GGG | 9  | 34 |
| AAATCAATCGCAACAGAGAT  | 14054 + | TGG | 22 | 22 |
| GCGATGCGATTTTCATCAGCT | 26412 + | TGG | 12 | 31 |
| CCAAACGGCAGCAACATGAA  | 33959 + | TGG | 12 | 31 |
| TTATTCATCTGGATTTGTAC  | 34603 + | CGG | 14 | 29 |
| GGAGACTTCCAAGAAGCTGA  | 30758 + | GGG | 16 | 27 |
| CCGGGACAACCTGGTGCAA   | 36800 + | AGG | 17 | 26 |
| CATACAAAAAGAAAATGAAA  | 12338 + | AGG | 41 | 4  |
| GCAGGTAAAAAAGGAGAACA  | 36827 + | AGG | 21 | 22 |
| GATAATTTCTTTATAGGGAA  | 7351 -  | TGG | 4  | 37 |
| GCTGATAAAAGTAAACTATC  | 16059 + | GGG | 16 | 26 |
| GATAAATCAGTGATAAATTC  | 30049 - | CGG | 6  | 35 |
| TTTATGTTATAGCTAGCCTT  | 39803 + | CGG | 6  | 35 |
| AATGGTTGAAGATGGAACAT  | 24478 + | TGG | 17 | 25 |
| TAATAACCTAGTAAGGTTAG  | 6262 -  | GGG | 11 | 30 |
| CGATGCGATTTTCATCAGCTT | 26413 + | GGG | 3  | 37 |
| ATGTACGTAGCGGTATAATG  | 37640 + | AGG | 35 | 8  |
| GCAATGGTTGCTAAAGATAA  | 18291 + | CGG | 25 | 17 |

|                       |         |     |    |    |
|-----------------------|---------|-----|----|----|
| ACCGATAGGCACTGATAAAA  | 29230 + | CGG | 17 | 24 |
| CCGACGGTTAAAATTTGGAC  | 37328 + | AGG | 7  | 33 |
| ATGTCGATAGAGAGGCTACA  | 35130 + | TGG | 18 | 23 |
| CGAAGATAGTACCGAAAGTT  | 24243 - | CGG | 19 | 22 |
| GTA CTGCCTGGACACTATAA | 31097 + | TGG | 9  | 31 |
| AAACAATTTATTTGAGTATG  | 21190 + | AGG | 40 | 3  |
| TTGATATTGATTCCAGCAGA  | 24057 + | TGG | 30 | 12 |
| AAA ACTGGAACGGTAAAGGT | 38522 + | TGG | 10 | 30 |
| TTAGAGAAGCCTGGACAAGA  | 32428 + | TGG | 11 | 29 |
| AAAGCAAAGATTGAAAAATA  | 38362 + | TGG | 11 | 29 |
| GATACATTGATGGAGAATTA  | 30264 + | TGG | 20 | 20 |
| TTTTGTGCAAAGTACGAATG  | 10797 + | AGG | 10 | 29 |
| ACACGGACAAAAACAAACTA  | 29385 + | GGG | 3  | 35 |
| GTGCAATGTTTTTTAAGAAT  | 30882 - | TGG | 15 | 24 |
| CACCTGCTGAATGGCGTGAT  | 23337 + | TGG | 10 | 28 |
| TCAACTAATTCAAGAATTAC  | 39451 + | AGG | 23 | 16 |
| GGGAAACAATTCAACCCAGA  | 38236 + | TGG | 14 | 24 |
| CGGACTGTTAGGGTACGCGA  | 18897 + | AGG | 5  | 32 |
| ATCACTAGTATTTTTGAATC  | 29296 - | TGG | 16 | 22 |
| AGACATATTAGATCGAGTCA  | 12412 + | AGG | 18 | 20 |
| GCGACAGGCGAAAGGCTGCA  | 38308 + | AGG | 11 | 26 |
| TTAAGTTTCATTCCAATGAT  | 17299 - | AGG | 22 | 16 |
| TTGCAAGGTTCATACGGAAC  | 8044 +  | TGG | 14 | 23 |
| CCTATAGGTGGTTTGGTAGC  | 39283 + | TGG | 26 | 12 |
| AATTCCGGTTCCTTGCTCTT  | 30034 - | TGG | 17 | 20 |
| GATATTGATGAGTATATCGA  | 17706 + | GGG | 18 | 19 |
| CTAGTATCTTTTGAATATGG  | 34804 - | AGG | 12 | 24 |
| GATCCTGGAGCAGTAGGAAA  | 38758 + | CGG | 4  | 31 |
| GTCTGATTTGATGAGGGCGG  | 13790 + | AGG | 15 | 21 |
| CATTTCTTTGTCTCGCTTT   | 23160 - | TGG | 17 | 19 |
| GCAGGGTTCCAAAATGGCTG  | 21629 - | TGG | 19 | 17 |
| CATGCCATAAGGTGCGTTTA  | 9560 -  | AGG | 11 | 24 |
| TGATTTTCATCACTGAAAACG | 23045 + | AGG | 11 | 24 |
| AATGTAACGATTAGAAATGA  | 26663 + | GGG | 22 | 14 |
| TTACTATGCAACAAGAGTGC  | 32820 + | CGG | 12 | 23 |
| ACATTA AAACTTTTTATGTG | 33760 + | TGG | 12 | 23 |
| TACTTTGTTAACAAGTTTTT  | 2501 +  | AGG | 23 | 13 |
| AATGCTTTTAGTTCTTTAGA  | 28777 - | TGG | 14 | 21 |
| GAATCAAGATTTTAGGTTGG  | 7467 +  | AGG | 9  | 25 |
| GAAAAAGACATTTGATACAG  | 10214 + | CGG | 30 | 6  |
| ACAGGTCACAGTAAAGTAAG  | 15390 + | TGG | 11 | 23 |
| GTCCATAGCTTTCCAAAATT  | 24880 + | GGG | 22 | 13 |
| ATGTAAACTAATAGATCAAG  | 22701 + | GGG | 5  | 28 |
| TGGCGTGATTGGCTTATTGG  | 23348 + | TGG | 17 | 17 |
| TGATTGGCTTATTGGTGGTC  | 23353 + | AGG | 21 | 13 |

|                        |         |     |    |    |
|------------------------|---------|-----|----|----|
| GCCTACAGCTAGTGAAGTGG   | 34411 + | TGG | 11 | 22 |
| AGCATATCTAAGTGATATTA   | 30979 + | CGG | 22 | 12 |
| TATTATGTATTTTCGAGGAGA  | 16895 + | AGG | 3  | 29 |
| TGGCTAGTTATTGAAGTATG   | 35195 + | TGG | 3  | 29 |
| GTTACTATAACTAAAATTAT   | 33319 + | GGG | 15 | 18 |
| AATGGCGCTTATTACTTTCA   | 10164 + | CGG | 5  | 27 |
| AAAGGTGCGAAAGGTGATAA   | 36773 + | AGG | 16 | 17 |
| ACCATGCTTAAAGGGATTTT   | 34257 + | AGG | 10 | 22 |
| CAATACTGTCTTTAAAGGAA   | 28069 + | CGG | 22 | 11 |
| ATAGGTATCAATGACAAACA   | 36353 + | AGG | 22 | 11 |
| GTATCAAATGGATATACCTA   | 30556 + | TGG | 12 | 20 |
| TAAATGGGCGCGAGAAAATC   | 10366 + | CGG | 3  | 28 |
| AAACTTTTACTCAAGAAAAA   | 20634 + | TGG | 4  | 27 |
| GATACTCATCGTCATTTAGA   | 18363 + | TGG | 6  | 25 |
| GGACCTAGAAGAGAAAATTG   | 6598 +  | TGG | 9  | 22 |
| ACAGTTTTTACGACTAAAGG   | 29601 + | AGG | 9  | 22 |
| TCAATCCTGACACTAAAATG   | 36882 + | TGG | 21 | 11 |
| GTTTTAGGTGTTTTGGTAAT   | 25745 + | AGG | 11 | 20 |
| TGTGGTTTTGTTGGTTGTAG   | 40161 - | GGG | 24 | 8  |
| TACCTACAAGATACCTAAAA   | 36490 + | AGG | 5  | 25 |
| TTGGTATTCTTGTTATTTA    | 25545 + | TGG | 7  | 23 |
| TCAGTTTGGGAGTCAATTAT   | 25985 + | CGG | 18 | 13 |
| GGACAAGATGGTGTGATGA    | 32440 + | CGG | 9  | 21 |
| ATGTGGATTCTCGGTTTGAT   | 34168 + | AGG | 15 | 15 |
| GTCGCAGGTCTTGGAGTTGT   | 24425 + | TGG | 20 | 10 |
| TGGTAAATGGAGTTTATTCG   | 31489 + | AGG | 4  | 24 |
| GATATTGGGGTTTTGTAACA   | 34524 + | TGG | 5  | 23 |
| GGAGATTTATTGAACGCTGC   | 24776 + | AGG | 6  | 22 |
| GAAACTAAAAATTAATAAA    | 4599 +  | AGG | 23 | 6  |
| TTACTTGAGTTTTCCCCTTG   | 13940 - | TGG | 4  | 23 |
| AAAATTAATAACTATTTTCAGG | 12663 + | TGG | 15 | 13 |
| GCTCCGCCACCATACTTTGA   | 38427 - | CGG | 5  | 22 |
| TGATAGCATGGTTGTTGAAT   | 21320 + | TGG | 16 | 12 |
| GAATCAGTCATCGATACTTG   | 30904 - | AGG | 6  | 21 |
| TTGCTTACTGGCGACTTCTC   | 25898 + | AGG | 7  | 20 |
| ATAGGCACGTTAGAGAAGCC   | 32419 + | TGG | 7  | 20 |
| CAAGGTATTATGAGTGGAGA   | 18153 + | GGG | 8  | 19 |
| AATAGGATCTGTGGTTTTGT   | 40170 - | TGG | 8  | 19 |
| TCGATAAGAAAATAGAAGAG   | 21349 + | TGG | 13 | 14 |
| GATTATTTAACGTATTTAAA   | 29819 + | TGG | 13 | 14 |
| AACCTTTTTAGGTATCTTGT   | 36476 - | AGG | 15 | 12 |
| CAACATCTCAAGAAGGGAAA   | 38034 + | TGG | 15 | 12 |
| CACTGGTGAAAAATATCCAG   | 33857 + | AGG | 6  | 20 |
| TATCCAGGTGGCGTTATTGA   | 33109 + | GGG | 7  | 19 |
| TTCGACTAAAGGTAAGAGTG   | 14665 + | GGG | 9  | 17 |

|                        |         |     |    |    |
|------------------------|---------|-----|----|----|
| GAAAGAATGACGAGTTTTAA   | 12729 + | TGG | 20 | 7  |
| AATACTGTCTTTAAAGGAAC   | 28070 + | GGG | 10 | 16 |
| CTGGCGACTTCTCAGGTGCT   | 25905 + | TGG | 11 | 15 |
| AGATTGCTTGTTAAAAACGG   | 30218 + | CGG | 11 | 15 |
| GATAGCGAAGATGGGAGAAA   | 22887 + | AGG | 2  | 23 |
| AAAATCATTAATTTTCTAC    | 30415 - | CGG | 5  | 20 |
| GTAGGCAATAAAAAAGATTA   | 38923 + | TGG | 6  | 19 |
| CGAACCAAAAGAGCAAGAAC   | 30046 + | CGG | 20 | 6  |
| GATTCCAGCAGATGGAAATT   | 24065 + | AGG | 2  | 22 |
| TGTAGACTTTTTTAATAAAAT  | 27718 - | TGG | 2  | 22 |
| GAACAAGTAGGACAATCACA   | 25094 + | AGG | 3  | 21 |
| TTGGCGACTCTGTAGCTAGA   | 28992 + | GGG | 4  | 20 |
| CTAAGTGATATTACGGAAGT   | 30986 + | TGG | 16 | 9  |
| ACGGCAGACTTGAGCAACAG   | 32966 + | TGG | 7  | 17 |
| ATGGCAGTACTTAATGCGGT   | 24359 + | TGG | 12 | 12 |
| TTCACTTTCTATACAGATAA   | 27493 + | AGG | 15 | 9  |
| AGTGCTGACGATATTGATAA   | 30518 + | AGG | 5  | 18 |
| ACTTCAATAACTAGCCAATT   | 35173 - | AGG | 5  | 18 |
| TATGTAAACTAATAGATCAA   | 22700 + | GGG | 8  | 15 |
| TTAATAGCCGGTGCGATTCA   | 39256 + | TGG | 9  | 14 |
| GTAGGAGTGA ACTATATAGC  | 40021 + | CGG | 9  | 14 |
| GGGACCAACAGTCAGATACA   | 40035 - | TGG | 9  | 14 |
| ATTTATTCCATCGGCCAAAG   | 30869 + | AGG | 5  | 17 |
| GGTCTTGGAGTTGTTGGCTT   | 24431 + | TGG | 17 | 6  |
| AGTGGCATTGTTGTTACTGCAA | 25195 + | TGG | 7  | 15 |
| TAATAGTTGGACAGGTTCTC   | 34750 + | CGG | 7  | 15 |
| TCACGTTCAAATAATGATAC   | 20329 - | TGG | 12 | 10 |
| ATCTCCAGCAAAAGCAATCA   | 36028 + | TGG | 2  | 19 |
| CAATAGTGGTTTTTTCAAGA   | 23108 + | GGG | 3  | 18 |
| ATACTTGCTGGTGCAACATT   | 15261 + | AGG | 15 | 7  |
| ACTTAAGGAGGAACAACAAA   | 942 +   | TGG | 16 | 6  |
| TGCGTCAGATTTAAGTGATG   | 33560 + | AGG | 8  | 13 |
| AGGTGATTACCATGCTTAAA   | 34249 + | GGG | 8  | 13 |
| AGTTACTATAACTAAAATTA   | 33318 + | TGG | 9  | 12 |
| CCCTAACGAAAAAGGTCACG   | 29548 + | AGG | 10 | 11 |
| ATAGAAGAGTGGGTTAAAAA   | 21360 + | AGG | 12 | 9  |
| TTTTAGGAAAGCGAGCATGG   | 29515 + | AGG | 2  | 18 |
| ATTTTCGGAAAACGGATTAT   | 7203 +  | CGG | 4  | 16 |
| TTCAACCCAGATGGTTGGTA   | 38245 + | TGG | 4  | 16 |
| TAATCCTGCAGAAGATATTA   | 20469 + | AGG | 5  | 15 |
| GTATTTTAGGTGGCGTATTT   | 25323 + | TGG | 5  | 15 |
| AAAAGAGTTGTCTCAAATGT   | 26258 + | AGG | 6  | 14 |
| AGGTGATGTTGTTAGAGTGG   | 28588 + | TGG | 19 | 2  |
| CAATGGACTTTACATTTGAA   | 19451 - | GGG | 10 | 10 |
| CTAGAATCATATTGCTAAAA   | 29826 - | CGG | 11 | 9  |

|                       |         |     |    |    |
|-----------------------|---------|-----|----|----|
| CCTCGTGACCTTTTTTCGTTA | 29532 - | GGG | 12 | 8  |
| ATCAGTTACGTTCAAGAGAA  | 25130 + | TGG | 15 | 5  |
| ATGTATTACGATCTAGAAAC  | 30788 + | AGG | 15 | 5  |
| GTAGATGCATCTAAATTCGA  | 28118 + | GGG | 6  | 13 |
| GCAGCAGGAGAAAAGCGCAAG | 39001 + | TGG | 6  | 13 |
| TCAGGTACCGACCATTTTTTC | 27288 - | AGG | 7  | 12 |
| AAAGCCTACAGCTAGTGAAG  | 34408 + | TGG | 9  | 10 |
| GGCTTACACCCTAACGAAAA  | 29540 + | AGG | 10 | 9  |
| AATATTCAAGAAAAAGAAAA  | 1835 +  | TGG | 1  | 17 |
| ATACTCATCGTCATTTAGAT  | 18364 + | GGG | 1  | 17 |
| GCAGTTTCCGGTGCGATTCA  | 25625 + | AGG | 1  | 17 |
| CTGCAAGTTTTTGGATAAAT  | 8536 -  | AGG | 4  | 14 |
| AAAGGAAAAGGAACGCTCGA  | 35807 + | CGG | 7  | 11 |
| TCAATTGCAGGGTTCCAAAA  | 21635 - | TGG | 9  | 9  |
| ATATACGCGATATGAAAATG  | 34151 + | TGG | 12 | 6  |
| TAATGATGGAAGTATATTGT  | 7326 +  | CGG | 3  | 14 |
| GGTAAATGGAGTTTATTCGA  | 31490 + | GGG | 6  | 11 |
| GTTTCAACTTATTATAAGGG  | 26739 + | AGG | 9  | 8  |
| AGAGTGGTGGATTCTGCCAT  | 28601 + | AGG | 3  | 13 |
| TTAATAACCTAGTAAGGTTA  | 6263 -  | GGG | 5  | 11 |
| TACACGATTAACAAAAATA   | 23259 + | AGG | 5  | 11 |
| GCCAATTATTACATTAAGC   | 28262 + | TGG | 6  | 10 |
| GTTTTCGGAAAACGGAAAAA  | 7233 +  | CGG | 2  | 13 |
| GTAAGCGATAAAACAATTAA  | 21065 + | AGG | 14 | 2  |
| GAAGAATATGCATTGATCAC  | 33840 + | TGG | 6  | 9  |
| TTCCAGCCTGGATATAAAAC  | 27618 - | CGG | 9  | 6  |
| TAAACTTAAATCTTTATATA  | 15068 + | CGG | 10 | 5  |
| GGATATTTATTTTTAGGTAA  | 37521 - | GGG | 2  | 12 |
| TGCTGGACGTTTTTATTTAA  | 27036 + | GGG | 3  | 11 |
| ATCGATGAGAACATCTAATG  | 14318 - | TGG | 4  | 10 |
| CCAGCAGTCGCTCAAATTAT  | 25292 + | CGG | 4  | 10 |
| GCTGGGTTCTGTATTGGTAA  | 30943 - | CGG | 4  | 10 |
| AGTGACCTAAAACGATTCAA  | 8760 +  | AGG | 6  | 8  |
| TACACTTTTTAAAAATCGGA  | 14710 + | AGG | 7  | 7  |
| TTTAACTAGAATAACTGGGG  | 25435 + | TGG | 7  | 7  |
| CAATTTTTAGTTAGAAACTT  | 31454 + | TGG | 9  | 5  |
| TGATCAGAAAGCATAAAAAA  | 3041 +  | TGG | 1  | 12 |
| AGACCATTATTTGATGCTAA  | 20141 + | CGG | 1  | 12 |
| TCCTAAATTAATAGGATCTG  | 40179 - | TGG | 1  | 12 |
| TTAAAAAGTCTACAGGGTGT  | 27743 + | AGG | 2  | 11 |
| TTCCCGTCAAAGTATGGTGG  | 38440 + | CGG | 3  | 10 |
| TTAAAAAGCGTTTTAGCGCT  | 1902 +  | TGG | 4  | 9  |
| AAACACGCTGTACAAACAGG  | 22374 + | TGG | 5  | 8  |
| CTAAAGCTAAGAGTAATCAA  | 12509 + | AGG | 7  | 6  |
| CCCGAAAAAATCTCATACAT  | 35644 + | GGG | 8  | 5  |

|                       |         |     |   |    |
|-----------------------|---------|-----|---|----|
| TTTTAGTCGTTTTTTTTATTT | 37834 + | TGG | 8 | 5  |
| ACTTTATTTTTAAAAGATAT  | 34509 + | TGG | 9 | 4  |
| CATAGAGGTGGTTAAATATG  | 21706 + | TGG | 1 | 11 |
| GCGGTTGGTGTATTAGGTGG  | 24374 + | TGG | 2 | 10 |
| ATTGGCGACTCTGTAGCTAG  | 28991 + | AGG | 2 | 10 |
| ATGTCTTACTTAACAAAAAA  | 6219 -  | AGG | 3 | 9  |
| GAAAACGGATTATCGGCAAA  | 7210 +  | CGG | 3 | 9  |
| AAATTTACTTACTTAGCAAA  | 19700 + | AGG | 3 | 9  |
| CAGGTGGACAGTTGCGTATA  | 22390 + | TGG | 3 | 9  |
| GATGATAGGAGATGCTGAAA  | 16999 + | AGG | 4 | 8  |
| AGACAAGCAGAGCAAATAAG  | 29147 + | AGG | 5 | 7  |
| GCTCTTAAAATGGTTGAAGA  | 24470 + | TGG | 7 | 5  |
| AGTAGATGCATCTAAATTCG  | 28117 + | AGG | 2 | 9  |
| AGCATAGGTGGCGCAATCTT  | 24755 + | CGG | 3 | 8  |
| GACACGGACAAAAACAACT   | 29384 + | AGG | 3 | 8  |
| GAACTATTTTTGGTATTTAA  | 34226 + | AGG | 3 | 8  |
| ATTCATGGTAAGCCTATAGG  | 39271 + | TGG | 3 | 8  |
| AAAAATCTCATACATGGGGC  | 35649 + | TGG | 5 | 6  |
| GCGCACGCTTTCTTAGAAAG  | 35891 + | TGG | 5 | 6  |
| AATACAGCATCTATAAGAAT  | 36335 + | AGG | 5 | 6  |
| CTTAGTCATGAAATGGTAGG  | 3576 +  | AGG | 6 | 5  |
| GAGGAGGTAGAACATGACTG  | 3805 +  | AGG | 6 | 5  |
| TAACCAATTAAGCAAATA    | 32013 + | TGG | 2 | 8  |
| AATGTTGAAAGGAGAGAAAA  | 5843 +  | AGG | 3 | 7  |
| CAGGCATTCTTTACACAAAA  | 31855 + | CGG | 3 | 7  |
| CACTACAGCATGGTCAATTG  | 3164 +  | CGG | 4 | 6  |
| GTAATAACGACCCTGAAAAA  | 27293 + | TGG | 4 | 6  |
| AATGTTATGAATATCATACA  | 25778 + | AGG | 5 | 5  |
| GGTAGCGTTGAAAGTTATGA  | 32851 + | GGG | 5 | 5  |
| GCTAAGTTATATAAACAAT   | 36170 + | CGG | 5 | 5  |
| ATTGAACTTGATGAAGCAGT  | 11805 + | AGG | 6 | 4  |
| CCGTTTTATAAAAAGAATGA  | 32611 + | TGG | 1 | 8  |
| CTATTTTTGGTATTTAAAGG  | 34229 + | AGG | 1 | 8  |
| AGTGCTTGCTGGAATGTGAA  | 35581 - | TGG | 1 | 8  |
| TTTTAGTTCTTTAGATGGGT  | 28772 - | CGG | 3 | 6  |
| GCTAACCTCCTTCGATTCA   | 23571 - | AGG | 4 | 5  |
| AAATTCCTTGAATCGAAAGG  | 23582 + | AGG | 4 | 5  |
| TGGAAATCATATTTATACGG  | 4814 -  | CGG | 5 | 4  |
| ATGGCAGCAATTTGCGGATA  | 16691 + | TGG | 5 | 4  |
| TAAAGGTGATGACGGCGAA   | 21601 + | TGG | 5 | 4  |
| TTAGCTGACTTACAAGAAGG  | 22221 + | TGG | 6 | 3  |
| GGAGGTAGTAGCTTAGGTAA  | 26468 + | AGG | 6 | 3  |
| AAAGAAATCGTTAGCACTAA  | 20218 + | TGG | 1 | 7  |
| AAAGAATTCAATGAAGTCGA  | 24101 + | AGG | 3 | 5  |
| AAACGATTCAAAGGCGCTCA  | 8769 +  | CGG | 4 | 4  |

|                       |         |     |   |   |
|-----------------------|---------|-----|---|---|
| ATACTTTGCCGTTATTACAA  | 23068 + | GGG | 4 | 4 |
| ATATTGGGGTTTTGTAAACAT | 34525 + | GGG | 4 | 4 |
| CTGGATTAACTAGAAATAAC  | 25430 + | TGG | 5 | 3 |
| GAGTATAACGAAAGTTTTAC  | 28034 + | AGG | 7 | 1 |
| AAGATAAAGCGTTATTATAT  | 5590 +  | TGG | 2 | 5 |
| GTACGTTTCCAATATAGAAC  | 30329 + | TGG | 2 | 5 |
| ATTTTCAATAAGAAAAACAA  | 31190 + | CGG | 2 | 5 |
| TTTGTTATTACAGGTCATGA  | 4292 +  | AGG | 3 | 4 |
| GGATCACGTGAATGTTTTTG  | 9712 -  | TGG | 3 | 4 |
| AAGCATAGAGGTCGAAAAAG  | 10878 + | TGG | 3 | 4 |
| AGTTCCAATAGGTAAAGAAG  | 29107 + | CGG | 3 | 4 |
| AATGCGTATAGATACATTGA  | 30254 + | TGG | 3 | 4 |
| CAGTATGTAGATGATAAATT  | 32692 + | CGG | 3 | 4 |
| AATAACTTAGGACAAATAAG  | 39094 + | AGG | 3 | 4 |
| TTTGTCACTTGGTATTGAAA  | 4945 +  | TGG | 4 | 3 |
| TTGTTGACGGTGGCGCAAA   | 33019 + | TGG | 4 | 3 |
| TTCCAATAGAAATAGTGTGA  | 20982 - | GGG | 5 | 2 |
| CGAGTACACTTTTTAAAAAT  | 14706 + | CGG | 2 | 4 |
| TATGGATCTATTGTGTTAAT  | 15852 + | AGG | 2 | 4 |
| GGACTGTTAGGGTACGCGAA  | 18898 + | GGG | 2 | 4 |
| TAACAACTAGTTGATGATA   | 21791 + | GGG | 2 | 4 |
| TTCTCAGAAGATAGCGAAGA  | 22878 + | TGG | 2 | 4 |
| AAAGGTGAAGCAGGTAAAAA  | 36818 + | AGG | 2 | 4 |
| AATAGTACGAGGCGGTAAAA  | 22271 + | CGG | 3 | 3 |
| GGTATCTTATATTGGTATAC  | 30626 + | AGG | 3 | 3 |
| GGTATTGATAAAATTATTGA  | 6774 -  | AGG | 4 | 2 |
| TTTTCTTTTCGTCGCTGAAA  | 8710 -  | TGG | 4 | 2 |
| TAAACGCAACGATTGATATA  | 9279 +  | AGG | 1 | 4 |
| TAGCCACTCATATTCTTCAA  | 14783 - | AGG | 1 | 4 |
| AACCTGAACGATTAAGGAGG  | 16258 + | GGG | 1 | 4 |
| GAAATGGAAGCTAAGAAAAT  | 19787 + | TGG | 1 | 4 |
| GATTAATATAGATAATTATC  | 34462 + | GGG | 1 | 4 |
| GTTTTAACTTCTTTAAATTG  | 34900 - | CGG | 1 | 4 |
| TTATCCAGGTGGCGTTATTG  | 33108 + | AGG | 2 | 3 |
| CAGCTAGTGAAGTGGTGGAG  | 34416 + | TGG | 2 | 3 |
| GGCAACGGAATAGGTTGGA   | 34655 + | CGG | 2 | 3 |
| TAGCTATAACATAAAAAAAT  | 39779 - | AGG | 2 | 3 |
| GAGCGCCTTTGAATCGTTTT  | 8749 -  | AGG | 3 | 2 |
| TATTCTATTTTGTGGTAAG   | 33082 + | TGG | 3 | 2 |
| AGGGTACGCGAAGGGCAAAA  | 18906 + | AGG | 4 | 1 |
| GGTAATGTGCCTGGAGATAA  | 22338 + | AGG | 4 | 1 |
| GATTCGTTACTAATTTAGC   | 25241 + | TGG | 4 | 1 |
| CATATGGCAAAAGTTAAGTA  | 21294 + | CGG | 1 | 3 |
| GTTAAAGCTAATGATAAGGA  | 27469 + | TGG | 1 | 3 |
| GGTGGCGTTATTGAGGGATT  | 33115 + | CGG | 1 | 3 |

|                       |         |     |   |   |
|-----------------------|---------|-----|---|---|
| GAGGTGATTACCATGCTTAA  | 34248 + | AGG | 1 | 3 |
| ACCCGAAAAAATCTCATACA  | 35643 + | TGG | 1 | 3 |
| AACAAAGATAAAGATGATGA  | 4319 +  | AGG | 2 | 2 |
| AAATGGAACAAGTGATATTT  | 24175 + | GGG | 2 | 2 |
| AAAGCGTTCGGTTTATTGAC  | 25463 + | TGG | 2 | 2 |
| CCAGAAGCTAACCCATAAAAT | 28568 + | AGG | 2 | 2 |
| TCTCTAAACGCTTTCGGTAA  | 31039 - | CGG | 2 | 2 |
| AAAGTAGGTGGCGTAATGTT  | 33931 + | TGG | 2 | 2 |
| GGGGTGGTAAGTAAAGCGTT  | 25451 + | CGG | 3 | 1 |
| AGCGTCTTTAAAAATAAAAA  | 68 +    | AGG | 1 | 2 |
| GCAAACGGGTTTTTCGGAAAA | 7225 +  | CGG | 1 | 2 |
| GAATACTTAAATAAAAAAGC  | 7390 +  | AGG | 1 | 2 |
| AATAATGGCAGTACTTAATG  | 24355 + | CGG | 1 | 2 |
| CTTTCAACATATTTTTCAA   | 12695 - | AGG | 2 | 1 |
| CCCTTTAACCGCCATTTTAG  | 23981 - | CGG | 2 | 1 |
| AGATGAAGGTAAGTATTTTA  | 4979 +  | CGG | 1 | 1 |
| ATGACGTTAATCTGGAAAGA  | 10685 + | TGG | 1 | 1 |
| GAAGCAGTAGGGATTATGAC  | 11817 + | GGG | 1 | 1 |
| GATGAAGAGTTAGATCCAAA  | 20060 + | CGG | 1 | 1 |
| TACTTTGCCGTTATTACAAG  | 23069 + | GGG | 1 | 1 |
| AAATTCGAGGGATTAGGCAA  | 28130 + | AGG | 1 | 1 |
| TATACCTTTATTAAAGGTTA  | 28331 + | TGG | 1 | 1 |
| TTTATCTATAAATAATGAAT  | 28837 + | TGG | 1 | 1 |
| TCCAATAACCGGCGTTTTG   | 31213 - | CGG | 1 | 1 |
| CCCCATGTATGAGATTTTTT  | 35629 - | CGG | 1 | 1 |
| CTTACCTAAAAATAAATATC  | 37539 + | CGG | 1 | 1 |
| GTTATTTTTTTCGTTTTTTT  | 40223 + | GGG | 1 | 1 |



| <b>Normalized Reads Replicate 1</b> | <b>Normalized Reads Replicate 2</b> | <b>Average Normalized Reads</b> |
|-------------------------------------|-------------------------------------|---------------------------------|
| 20977.99342                         | 19284.624                           | 20131.30871                     |
| 12308.04519                         | 26456.03014                         | 19382.03766                     |
| 13757.15145                         | 15393.20093                         | 14575.17619                     |
| 15522.44084                         | 13018.90788                         | 14270.67436                     |
| 13012.88665                         | 14008.41723                         | 13510.65194                     |
| 11554.22321                         | 14885.87335                         | 13220.04828                     |
| 6163.579766                         | 15525.54725                         | 10844.56351                     |
| 9487.484684                         | 10255.51664                         | 9871.50066                      |
| 11383.38876                         | 7679.616019                         | 9531.502389                     |
| 9513.766908                         | 9325.563134                         | 9419.665021                     |
| 11032.56089                         | 6368.505104                         | 8700.532996                     |
| 9407.045149                         | 7830.049674                         | 8618.547412                     |
| 8327.881099                         | 8380.610381                         | 8354.24574                      |
| 8479.999427                         | 7547.71085                          | 8013.855138                     |
| 8157.046643                         | 7162.141893                         | 7659.594268                     |
| 5536.390328                         | 9206.451442                         | 7371.420885                     |
| 7007.000231                         | 6749.221362                         | 6878.110797                     |
| 5103.530061                         | 8396.933095                         | 6750.231578                     |
| 5557.49575                          | 7826.079284                         | 6691.787517                     |
| 5485.816957                         | 7597.120144                         | 6541.468551                     |
| 6319.680249                         | 6581.582686                         | 6450.631467                     |
| 5942.96837                          | 6520.262222                         | 6231.615296                     |
| 7425.922954                         | 4999.161807                         | 6212.54238                      |
| 5019.108372                         | 7309.046312                         | 6164.077342                     |
| 2801.844375                         | 8839.410971                         | 5820.627673                     |
| 4677.041243                         | 6844.510716                         | 5760.775979                     |
| 7498.796394                         | 3804.956811                         | 5651.876602                     |
| 4609.344605                         | 6286.450383                         | 5447.897494                     |
| 5999.514974                         | 4791.819233                         | 5395.667103                     |
| 2660.079651                         | 7835.784681                         | 5247.932166                     |
| 4196.79333                          | 6129.399412                         | 5163.096371                     |
| 4499.835338                         | 5675.010367                         | 5087.422853                     |
| 5790.850043                         | 4351.988283                         | 5071.419163                     |
| 4873.361492                         | 4589.329357                         | 4731.345425                     |
| 5029.063759                         | 4413.308746                         | 4721.186253                     |
| 5932.216551                         | 3062.493934                         | 4497.355243                     |
| 6138.093973                         | 2850.298662                         | 4494.196317                     |
| 5620.812017                         | 3189.105251                         | 4404.958634                     |
| 4659.121545                         | 4037.445187                         | 4348.283366                     |
| 4686.996631                         | 3883.923451                         | 4285.460041                     |
| 4581.469519                         | 3884.364605                         | 4232.917062                     |
| 5217.021483                         | 3162.635986                         | 4189.828735                     |
| 4461.208433                         | 3850.83687                          | 4156.022651                     |
| 5312.593207                         | 2885.14986                          | 4098.871534                     |

|             |             |             |
|-------------|-------------|-------------|
| 3402.353374 | 4570.800872 | 3986.577123 |
| 4217.102321 | 3682.757039 | 3949.92968  |
| 4142.636019 | 3682.757039 | 3912.696529 |
| 5087.999656 | 2736.039669 | 3912.019662 |
| 5671.783603 | 2052.691483 | 3862.237543 |
| 3641.6809   | 4035.239414 | 3838.460157 |
| 2987.811021 | 4488.304997 | 3738.058009 |
| 3839.873289 | 3634.970836 | 3737.422062 |
| 3888.176304 | 3581.732678 | 3734.954491 |
| 3526.994831 | 3910.392716 | 3718.693773 |
| 4232.632726 | 3146.313273 | 3689.472999 |
| 3646.857701 | 3429.093251 | 3537.975476 |
| 5118.662251 | 1877.994336 | 3498.328293 |
| 2684.769013 | 4278.75665  | 3481.762832 |
| 4017.596347 | 2945.588015 | 3481.592181 |
| 5021.89588  | 1720.50221  | 3371.199045 |
| 2613.886651 | 3991.565128 | 3302.725889 |
| 3244.261814 | 3359.390854 | 3301.826334 |
| 3348.594279 | 3188.222942 | 3268.408611 |
| 3371.690779 | 3128.225942 | 3249.95836  |
| 2871.930306 | 3498.354494 | 3185.1424   |
| 3079.798806 | 3257.04303  | 3168.420918 |
| 3377.664012 | 2814.124    | 3095.894006 |
| 3791.409934 | 2336.794925 | 3064.102429 |
| 2269.828445 | 3828.779149 | 3049.303797 |
| 2972.678832 | 3009.555405 | 2991.117118 |
| 2275.403462 | 3664.228553 | 2969.816008 |
| 1069.606878 | 4715.058365 | 2892.332621 |
| 2130.453014 | 3649.670458 | 2890.061736 |
| 4647.97151  | 1059.6529   | 2853.812205 |
| 4521.338976 | 1148.324937 | 2834.831956 |
| 2796.667573 | 2859.12175  | 2827.894662 |
| 2617.072375 | 2997.203081 | 2807.137728 |
| 2063.951023 | 3541.587627 | 2802.769325 |
| 1013.856705 | 4546.537379 | 2780.197042 |
| 3056.702306 | 2459.435852 | 2758.069079 |
| 2407.611014 | 3015.290412 | 2711.450713 |
| 2367.789462 | 2953.528794 | 2660.659128 |
| 3489.164357 | 1746.530321 | 2617.847339 |
| 2400.84135  | 2819.859007 | 2610.350178 |
| 456.7531976 | 4749.468409 | 2603.110803 |
| 2130.453014 | 3034.701206 | 2582.57711  |
| 3188.113426 | 1943.285189 | 2565.699307 |
| 1316.500498 | 3779.811009 | 2548.155754 |
| 2232.396186 | 2853.386742 | 2542.891464 |

|             |             |             |
|-------------|-------------|-------------|
| 3473.235736 | 1609.331298 | 2541.283517 |
| 2811.003332 | 2166.068167 | 2488.53575  |
| 3867.867313 | 1102.444878 | 2485.156095 |
| 3161.432987 | 1806.527321 | 2483.980154 |
| 661.8341886 | 4273.021643 | 2467.427916 |
| 3337.046029 | 1543.158136 | 2440.102083 |
| 3117.231064 | 1674.622151 | 2395.926608 |
| 2935.246573 | 1850.642762 | 2392.944668 |
| 2330.755419 | 2447.524683 | 2389.140051 |
| 3350.187141 | 1391.401018 | 2370.79408  |
| 1281.457533 | 3403.506295 | 2342.481914 |
| 2745.695987 | 1911.522071 | 2328.609029 |
| 2791.092556 | 1863.43624  | 2327.264398 |
| 3365.319331 | 1264.789702 | 2315.054516 |
| 2678.79578  | 1941.079417 | 2309.937598 |
| 1848.516428 | 2755.009308 | 2301.762868 |
| 2647.336755 | 1922.992086 | 2285.16442  |
| 2954.360918 | 1615.50746  | 2284.934189 |
| 2680.388642 | 1870.053556 | 2275.221099 |
| 2386.903807 | 2155.480461 | 2271.192134 |
| 2492.430919 | 1997.106027 | 2244.768473 |
| 2832.108754 | 1502.130776 | 2167.119765 |
| 2573.666884 | 1758.44149  | 2166.054187 |
| 324.9438616 | 3906.86348  | 2115.903671 |
| 1794.359118 | 2304.149498 | 2049.254308 |
| 2348.675117 | 1720.50221  | 2034.588664 |
| 2760.828177 | 1289.494349 | 2025.161263 |
| 2411.194953 | 1607.125526 | 2009.16024  |
| 43.40549131 | 3965.537017 | 2004.471254 |
| 2170.274566 | 1834.320049 | 2002.297307 |
| 2119.701195 | 1868.288938 | 1993.995067 |
| 2787.110401 | 1138.61954  | 1962.86497  |
| 2849.630237 | 1069.358297 | 1959.494267 |
| 1270.307498 | 2568.842146 | 1919.574822 |
| 2471.325496 | 1359.196746 | 1915.261121 |
| 2231.997971 | 1524.188496 | 1878.093234 |
| 2077.888566 | 1649.035195 | 1863.461881 |
| 2281.77491  | 1417.429129 | 1849.602019 |
| 1036.156774 | 2661.484573 | 1848.820674 |
| 2409.602091 | 1241.849672 | 1825.725882 |
| 2305.667841 | 1344.197496 | 1824.932669 |
| 2677.999349 | 870.838811  | 1774.41908  |
| 1641.44436  | 1856.377769 | 1748.911064 |
| 2570.082944 | 915.3954067 | 1742.739176 |
| 2950.378763 | 534.237994  | 1742.308378 |

|             |             |             |
|-------------|-------------|-------------|
| 984.7869726 | 2475.758565 | 1730.272769 |
| 1161.196446 | 2280.32716  | 1720.761803 |
| 1579.322739 | 1856.377769 | 1717.850254 |
| 2089.0386   | 1330.521709 | 1709.780155 |
| 2445.441488 | 926.424267  | 1685.932877 |
| 2471.325496 | 897.7492302 | 1684.537363 |
| 1835.375316 | 1498.601541 | 1666.988428 |
| 1694.407023 | 1638.888644 | 1666.647834 |
| 1977.538256 | 1345.079805 | 1661.30903  |
| 864.5258866 | 2430.760815 | 1647.643351 |
| 2088.640385 | 1205.67501  | 1647.157698 |
| 2153.947729 | 1133.766841 | 1643.857285 |
| 1684.451635 | 1559.039695 | 1621.745665 |
| 2533.447117 | 644.5265972 | 1588.986857 |
| 1455.875929 | 1701.53257  | 1578.70425  |
| 1021.4228   | 2127.687733 | 1574.555267 |
| 1829.003868 | 1312.875533 | 1570.9397   |
| 1747.767902 | 1325.669011 | 1536.718457 |
| 1430.788351 | 1623.007085 | 1526.897718 |
| 1612.374627 | 1438.163386 | 1525.269006 |
| 1979.927549 | 1007.596679 | 1493.762114 |
| 2097.799342 | 875.2503551 | 1486.524848 |
| 2066.340316 | 904.8077008 | 1485.574008 |
| 1244.423489 | 1725.796063 | 1485.109776 |
| 1227.698438 | 1735.50146  | 1481.599949 |
| 2474.113005 | 486.152163  | 1480.132584 |
| 432.0638355 | 2487.22858  | 1459.646208 |
| 742.273723  | 2175.773564 | 1459.023644 |
| 1005.494179 | 1899.610902 | 1452.552541 |
| 1521.979705 | 1344.63865  | 1433.309177 |
| 2254.696255 | 598.6465383 | 1426.671397 |
| 584.9785939 | 2254.740204 | 1419.859399 |
| 1459.459868 | 1377.284077 | 1418.371973 |
| 1883.161178 | 948.4819877 | 1415.821583 |
| 1589.676342 | 1240.085055 | 1414.880698 |
| 940.9832658 | 1832.555431 | 1386.769348 |
| 433.2584821 | 2324.883756 | 1379.071119 |
| 2115.71904  | 628.6450383 | 1372.182039 |
| 1967.184652 | 757.9032813 | 1362.543967 |
| 1596.844222 | 1094.504098 | 1345.67416  |
| 1582.508463 | 1095.827562 | 1339.168012 |
| 1697.990963 | 967.4516274 | 1332.721295 |
| 1361.897067 | 1300.082055 | 1330.989561 |
| 1151.241059 | 1475.661511 | 1313.451285 |
| 1568.172704 | 1016.860922 | 1292.516813 |

|             |             |             |
|-------------|-------------|-------------|
| 1329.243395 | 1230.379657 | 1279.811526 |
| 2220.847936 | 336.600817  | 1278.724377 |
| 930.6296624 | 1603.155136 | 1266.892399 |
| 1088.721222 | 1414.782202 | 1251.751712 |
| 1234.069886 | 1267.436628 | 1250.753257 |
| 1192.257257 | 1307.140525 | 1249.698891 |
| 1447.513403 | 1025.242856 | 1236.378129 |
| 442.417439  | 2029.751454 | 1236.084446 |
| 1658.965842 | 804.6656491 | 1231.815746 |
| 627.1894387 | 1811.821174 | 1219.505306 |
| 1396.143601 | 1040.242106 | 1218.192853 |
| 1224.114498 | 1184.940753 | 1204.527626 |
| 511.7069389 | 1868.288938 | 1189.997939 |
| 744.2648006 | 1619.919004 | 1182.091902 |
| 1109.826645 | 1251.113915 | 1180.47028  |
| 1287.430765 | 1065.387907 | 1176.409336 |
| 1240.441334 | 1103.327187 | 1171.88426  |
| 847.4026194 | 1472.57343  | 1159.988025 |
| 1759.316152 | 551.0018617 | 1155.159007 |
| 258.0436548 | 2050.485711 | 1154.264683 |
| 1429.99192  | 877.4561272 | 1153.724024 |
| 852.5794211 | 1450.51571  | 1151.547565 |
| 1076.376541 | 1218.027334 | 1147.201938 |
| 1707.548135 | 576.1476632 | 1141.847899 |
| 1073.589033 | 1196.851922 | 1135.220477 |
| 705.2396799 | 1564.774702 | 1135.007191 |
| 1211.769817 | 1030.977863 | 1121.37384  |
| 584.9785939 | 1654.329048 | 1119.653821 |
| 1533.527955 | 704.0824429 | 1118.805199 |
| 1109.030214 | 1118.767591 | 1113.898902 |
| 1653.390825 | 565.1188029 | 1109.254814 |
| 1222.521636 | 992.1562745 | 1107.338955 |
| 450.7799648 | 1718.296438 | 1084.538201 |
| 1420.036532 | 745.9921122 | 1083.014322 |
| 1272.696791 | 880.5442081 | 1076.6205   |
| 1353.932757 | 790.9898623 | 1072.461309 |
| 433.2584821 | 1693.591791 | 1063.425137 |
| 1724.273187 | 392.186273  | 1058.22973  |
| 507.7247837 | 1591.685122 | 1049.704953 |
| 502.9461975 | 1578.891644 | 1040.918921 |
| 935.4082486 | 1136.854922 | 1036.131585 |
| 547.5463354 | 1514.483099 | 1031.014717 |
| 1194.248334 | 850.9868624 | 1022.617598 |
| 1036.55499  | 997.8912819 | 1017.223136 |
| 1243.228843 | 771.5790681 | 1007.403956 |

|             |             |             |
|-------------|-------------|-------------|
| 1437.956231 | 562.4718764 | 1000.214053 |
| 1249.600291 | 743.7863401 | 996.6933156 |
| 1070.403309 | 910.9838626 | 990.6935856 |
| 1469.415256 | 507.7687292 | 988.5919928 |
| 1558.615532 | 406.3032143 | 982.4593732 |
| 929.0368003 | 1035.389407 | 982.2131036 |
| 1345.968446 | 617.1750236 | 981.5717349 |
| 1433.57586  | 513.0625822 | 973.319221  |
| 1090.314085 | 848.7810904 | 969.5475874 |
| 1258.759248 | 676.7308693 | 967.7450587 |
| 478.655051  | 1431.54607  | 955.1005604 |
| 921.4707055 | 985.9801128 | 953.7254091 |
| 1211.769817 | 683.3481855 | 947.5590013 |
| 1188.275102 | 697.4651267 | 942.8701142 |
| 1189.071533 | 694.3770459 | 941.7242893 |
| 1045.315731 | 824.5175976 | 934.9166644 |
| 966.0708433 | 900.3961567 | 933.2335    |
| 1393.754308 | 468.9471409 | 931.3507245 |
| 1369.463162 | 472.0352218 | 920.7491917 |
| 1027.396033 | 813.0475829 | 920.2218079 |
| 1209.380524 | 624.6746486 | 917.0275863 |
| 738.6897833 | 1085.68101  | 912.1853967 |
| 893.1974038 | 915.3954067 | 904.2964052 |
| 1634.27648  | 172.050221  | 903.1633506 |
| 1416.452593 | 382.480876  | 899.4667343 |
| 1136.507084 | 660.4081561 | 898.4576203 |
| 826.297197  | 969.6573995 | 897.9772982 |
| 1248.405645 | 541.737619  | 895.0716318 |
| 1348.755955 | 434.9782511 | 891.867103  |
| 1031.776404 | 739.8159504 | 885.796177  |
| 1116.596309 | 652.4673766 | 884.5318426 |
| 884.0384469 | 879.2207448 | 881.6295959 |
| 868.1098262 | 871.7211198 | 869.915473  |
| 385.0744046 | 1351.255967 | 868.1651856 |
| 350.4296546 | 1364.931753 | 857.680704  |
| 1044.121085 | 642.3208251 | 843.2209549 |
| 638.7376887 | 1038.036333 | 838.3870111 |
| 734.3094127 | 931.2769656 | 832.7931891 |
| 496.5747492 | 1165.971113 | 831.2729312 |
| 811.1650074 | 850.9868624 | 831.0759349 |
| 476.6639734 | 1183.61729  | 830.1406316 |
| 1146.860688 | 510.4156557 | 828.6381718 |
| 1124.560619 | 528.944141  | 826.75238   |
| 714.3986368 | 921.1304141 | 817.7645254 |
| 855.3669297 | 777.7552299 | 816.5610798 |

|             |             |             |
|-------------|-------------|-------------|
| 720.7700851 | 904.3665464 | 812.5683157 |
| 832.2704298 | 787.460627  | 809.8655284 |
| 880.8527228 | 738.4924871 | 809.672605  |
| 789.6613695 | 813.0475829 | 801.3544762 |
| 1163.58574  | 436.3017143 | 799.943727  |
| 1056.465766 | 541.737619  | 799.1016923 |
| 964.4779813 | 626.8804207 | 795.679201  |
| 1231.282377 | 350.2766038 | 790.7794906 |
| 997.5298692 | 581.8826706 | 789.7062699 |
| 1238.848472 | 330.8658097 | 784.8571409 |
| 1070.005093 | 496.2987145 | 783.1519038 |
| 827.093628  | 728.3459356 | 777.7197818 |
| 891.6045417 | 658.202384  | 774.9034629 |
| 942.5761279 | 603.4992368 | 773.0376823 |
| 384.2779735 | 1158.030334 | 771.1541537 |
| 743.4683695 | 794.0779432 | 768.7731564 |
| 1028.590679 | 502.9160307 | 765.7533551 |
| 1218.539481 | 311.0138611 | 764.776671  |
| 716.7879299 | 805.9891123 | 761.3885211 |
| 767.3613005 | 743.3451857 | 755.3532431 |
| 348.8367926 | 1157.148025 | 752.9924088 |
| 246.8936203 | 1255.084305 | 750.9889625 |
| 418.1262925 | 1080.387157 | 749.2567248 |
| 1065.624722 | 432.772479  | 749.1986008 |
| 420.11737   | 1067.593679 | 743.8555246 |
| 583.7839474 | 903.925392  | 743.8546697 |
| 949.7440072 | 535.1203028 | 742.432155  |
| 721.5665161 | 743.7863401 | 732.6764281 |
| 743.4683695 | 718.6405386 | 731.0544541 |
| 732.7165506 | 727.0224724 | 729.8695115 |
| 1320.482653 | 134.9932503 | 727.7379517 |
| 616.0394042 | 832.8995315 | 724.4694679 |
| 1078.765835 | 370.1285524 | 724.4471935 |
| 565.4660336 | 879.2207448 | 722.3433892 |
| 961.6904727 | 481.2994644 | 721.4949685 |
| 930.6296624 | 502.4748763 | 716.5522693 |
| 592.9429043 | 835.9876124 | 714.4652583 |
| 819.1293177 | 607.4696265 | 713.2994721 |
| 283.5294478 | 1131.119915 | 707.3246812 |
| 214.2399479 | 1199.057694 | 706.6488211 |
| 1281.059317 | 125.7290077 | 703.3941623 |
| 935.4082486 | 465.4179056 | 700.4130771 |
| 923.0635675 | 472.4763762 | 697.7699719 |
| 375.9154477 | 1019.507848 | 697.7116479 |
| 539.582025  | 854.9572521 | 697.2696386 |

|             |             |             |
|-------------|-------------|-------------|
| 486.6193613 | 901.7196199 | 694.1694906 |
| 422.9048787 | 960.8343112 | 691.8695949 |
| 570.2446198 | 804.6656491 | 687.4551344 |
| 626.7912232 | 744.2274945 | 685.5093588 |
| 346.4474995 | 1019.507848 | 682.9776738 |
| 138.5789998 | 1221.997724 | 680.2883617 |
| 809.9703608 | 541.2964646 | 675.6334127 |
| 687.3199817 | 663.0550825 | 675.1875321 |
| 84.02347401 | 1243.61429  | 663.8188819 |
| 594.9339818 | 726.1401636 | 660.5370727 |
| 934.6118175 | 385.5689568 | 660.0903872 |
| 812.3596539 | 505.1218027 | 658.7407283 |
| 398.6137321 | 916.2777155 | 657.4457238 |
| 388.2601287 | 924.6596494 | 656.459889  |
| 758.6005592 | 553.6487881 | 656.1246737 |
| 849.393697  | 453.5067364 | 651.4502167 |
| 1020.228154 | 269.5453463 | 644.8867499 |
| 518.8748182 | 769.373296  | 644.1240571 |
| 611.260818  | 651.1439134 | 631.2023657 |
| 696.4789386 | 561.5895676 | 629.0342531 |
| 688.1164127 | 569.530347  | 628.8233799 |
| 169.6398101 | 1080.828312 | 625.2340608 |
| 954.9208089 | 294.6911478 | 624.8059783 |
| 837.4472315 | 411.1559128 | 624.3015721 |
| 24.29114651 | 1224.203496 | 624.2473211 |
| 662.2324042 | 572.1772735 | 617.2048388 |
| 361.5796891 | 872.1622742 | 616.8709817 |
| 845.4115418 | 386.4512657 | 615.9314037 |
| 565.0678181 | 666.5843178 | 615.826068  |
| 672.1877921 | 557.1780235 | 614.6829078 |
| 435.2495597 | 791.8721711 | 613.5608654 |
| 338.8814046 | 880.1030537 | 609.4922292 |
| 657.453818  | 555.4134058 | 606.4336119 |
| 698.4700162 | 507.7687292 | 603.1193727 |
| 1020.626369 | 179.1086916 | 599.8675304 |
| 433.2584821 | 765.4029063 | 599.3306942 |
| 391.4458528 | 804.2244947 | 597.8351738 |
| 189.5505859 | 996.1266643 | 592.8386251 |
| 287.9098185 | 896.4257669 | 592.1677927 |
| 695.284292  | 479.0936924 | 587.1889922 |
| 580.9964388 | 588.4999868 | 584.7482128 |
| 680.5503179 | 480.4171556 | 580.4837368 |
| 77.65202574 | 1081.269466 | 579.4607458 |
| 521.2641113 | 636.5858178 | 578.9249645 |
| 485.4247148 | 667.9077811 | 576.6662479 |



|             |             |             |
|-------------|-------------|-------------|
| 713.6022058 | 438.9486408 | 576.2754233 |
| 427.2852493 | 719.9640018 | 573.6246256 |
| 865.7205331 | 277.9272801 | 571.8239066 |
| 434.8513442 | 707.1705238 | 571.010934  |
| 644.7109214 | 496.7398689 | 570.7253952 |
| 576.6160681 | 561.5895676 | 569.1028178 |
| 444.8067321 | 691.7301194 | 568.2684257 |
| 115.4824998 | 1017.302076 | 566.3922879 |
| 465.5139389 | 663.0550825 | 564.2845107 |
| 254.4597151 | 873.0445831 | 563.7521491 |
| 569.4481888 | 557.6191779 | 563.5336833 |
| 739.0879989 | 386.4512657 | 562.7696323 |
| 287.1133875 | 824.0764432 | 555.5949154 |
| 645.905568  | 462.7709791 | 554.3382735 |
| 351.2260857 | 755.2563548 | 553.2412202 |
| 406.5780425 | 695.7005091 | 551.1392758 |
| 444.4085166 | 656.8789208 | 550.6437187 |
| 627.1894387 | 471.1529129 | 549.1711758 |
| 658.250249  | 439.3897952 | 548.8200221 |
| 702.4521713 | 392.186273  | 547.3192222 |
| 560.2892319 | 534.237994  | 547.2636129 |
| 789.263154  | 303.9553905 | 546.6092722 |
| 269.1936892 | 823.1941344 | 546.1939118 |
| 559.4928009 | 529.3852954 | 544.4390482 |
| 813.156085  | 272.6334272 | 542.8947561 |
| 670.9931455 | 412.9205304 | 541.956838  |
| 742.273723  | 341.4535156 | 541.8636193 |
| 500.5569044 | 582.323825  | 541.4403647 |
| 658.250249  | 418.2143834 | 538.2323162 |
| 18.31791376 | 1054.800201 | 536.5590575 |
| 506.1319216 | 556.736869  | 531.4343953 |
| 422.9048787 | 633.0565825 | 527.9807306 |
| 557.5017233 | 498.0633321 | 527.7825277 |
| 294.2812668 | 760.5502078 | 527.4157373 |
| 752.6273264 | 298.6615375 | 525.644432  |
| 844.6151108 | 206.4602652 | 525.537688  |
| 678.5592403 | 370.5697068 | 524.5644736 |
| 38.2286896  | 1010.243605 | 524.2361475 |
| 585.3768094 | 456.5948173 | 520.9858134 |
| 706.036111  | 335.2773538 | 520.6567324 |
| 704.8414644 | 335.7185082 | 520.2799863 |
| 648.2948611 | 385.1278024 | 516.7113318 |
| 630.3751628 | 401.8916701 | 516.1334165 |
| 349.6332236 | 680.2601046 | 514.9466641 |
| 395.0297925 | 631.7331192 | 513.3814559 |

|             |             |             |
|-------------|-------------|-------------|
| 682.14318   | 344.100442  | 513.121811  |
| 610.0661715 | 411.5970672 | 510.8316193 |
| 507.3265682 | 512.1802733 | 509.7534208 |
| 620.8179904 | 389.5393466 | 505.1786685 |
| 441.6210079 | 566.0011117 | 503.8110598 |
| 441.6210079 | 560.2661043 | 500.9435561 |
| 647.49843   | 354.2469935 | 500.8727118 |
| 221.4078272 | 775.9906122 | 498.6992197 |
| 252.070422  | 745.1098033 | 498.5901127 |
| 440.4263614 | 549.237244  | 494.8318027 |
| 887.224171  | 100.5832061 | 493.9036886 |
| 535.9980854 | 450.4186555 | 493.2083705 |
| 472.6818182 | 509.5333469 | 491.1075825 |
| 686.9217662 | 289.3972948 | 488.1595305 |
| 750.2380333 | 225.429905  | 487.8339692 |
| 625.5965766 | 349.8354494 | 487.716013  |
| 672.5860076 | 301.308464  | 486.9472358 |
| 750.2380333 | 222.7829785 | 486.5105059 |
| 547.5463354 | 425.272854  | 486.4095947 |
| 691.3021369 | 281.015361  | 486.1587489 |
| 608.8715249 | 360.8643097 | 484.8679173 |
| 516.0873095 | 449.0951923 | 482.5912509 |
| 281.1401547 | 678.9366414 | 480.0383981 |
| 312.5991806 | 641.8796707 | 477.2394256 |
| 545.1570423 | 401.4505157 | 473.303779  |
| 628.7823008 | 313.6607875 | 471.2215442 |
| 582.1910853 | 357.7762288 | 469.9836571 |
| 79.24488781 | 860.2511051 | 469.7479965 |
| 346.0492839 | 592.9115309 | 469.4804074 |
| 126.2343188 | 812.6064285 | 469.4203736 |
| 483.8318527 | 448.6540379 | 466.2429453 |
| 464.3192924 | 464.0944423 | 464.2068674 |
| 580.9964388 | 345.8650597 | 463.4307492 |
| 557.1035078 | 367.0404715 | 462.0719896 |
| 578.2089301 | 337.9242803 | 458.0666052 |
| 618.8269128 | 296.014611  | 457.4207619 |
| 480.6461286 | 434.0959423 | 457.3710354 |
| 458.3460596 | 453.9478908 | 456.1469752 |
| 644.3127059 | 266.016111  | 455.1644084 |
| 248.4864824 | 657.7612296 | 453.123856  |
| 285.9187409 | 619.8219501 | 452.8703455 |
| 151.3218963 | 748.6390386 | 449.9804675 |
| 569.4481888 | 329.9835008 | 449.7158448 |
| 601.3054301 | 297.3380743 | 449.3217522 |
| 31.85724133 | 865.544958  | 448.7010997 |

|             |             |             |
|-------------|-------------|-------------|
| 460.3371372 | 427.4786261 | 443.9078816 |
| 724.3540247 | 157.9332798 | 441.1436523 |
| 500.9551199 | 379.8339495 | 440.3945347 |
| 569.0499733 | 310.5727067 | 439.81134   |
| 152.9147584 | 718.1993841 | 435.5570713 |
| 293.0866202 | 577.4711264 | 435.2788733 |
| 548.7409819 | 320.2781037 | 434.5095428 |
| 392.6404994 | 472.4763762 | 432.5584378 |
| 525.2462664 | 336.600817  | 430.9235417 |
| 207.8684997 | 653.3496855 | 430.6090926 |
| 490.999732  | 368.3639347 | 429.6818334 |
| 500.9551199 | 355.5704568 | 428.2627883 |
| 451.1781803 | 404.979751  | 428.0789657 |
| 504.9372751 | 348.0708318 | 426.5040534 |
| 441.6210079 | 404.979751  | 423.3003795 |
| 454.3639045 | 386.0101113 | 420.1870079 |
| 356.8011029 | 481.2994644 | 419.0502837 |
| 477.0621889 | 358.6585377 | 417.8603633 |
| 560.2892319 | 271.7511183 | 416.0201751 |
| 590.5536112 | 236.4587653 | 413.5061882 |
| 338.4831891 | 487.4756262 | 412.9794077 |
| 483.8318527 | 340.5712067 | 412.2015297 |
| 664.6216973 | 159.256743  | 411.9392201 |
| 485.8229303 | 337.0419714 | 411.4324509 |
| 258.8400858 | 563.3541852 | 411.0971355 |
| 640.3305507 | 180.8733093 | 410.60193   |
| 541.5731026 | 278.8095889 | 410.1913458 |
| 330.1206633 | 489.2402439 | 409.6804536 |
| 202.2934824 | 616.7338692 | 409.5136758 |
| 295.4759133 | 522.3268248 | 408.9013691 |
| 530.0248526 | 285.8680595 | 407.9464561 |
| 234.1507238 | 577.9122809 | 406.0315023 |
| 479.0532665 | 318.5134861 | 398.7833763 |
| 500.1586889 | 295.1323022 | 397.6454955 |
| 569.0499733 | 221.0183608 | 395.0341671 |
| 615.2429732 | 173.3736843 | 394.3083287 |
| 425.6923873 | 359.0996921 | 392.3960397 |
| 140.5700774 | 641.4385163 | 391.0042968 |
| 386.6672666 | 394.8331995 | 390.7502331 |
| 46.59121545 | 732.7574798 | 389.6743476 |
| 154.5076205 | 624.2334942 | 389.3705573 |
| 144.5522325 | 633.9388913 | 389.2455619 |
| 226.584629  | 551.8841705 | 389.2343997 |
| 422.9048787 | 353.8058391 | 388.3553589 |
| 517.6801716 | 258.9576404 | 388.318906  |

|             |             |             |
|-------------|-------------|-------------|
| 148.5343877 | 626.8804207 | 387.7074042 |
| 343.2617753 | 431.8901702 | 387.5759728 |
| 139.3754308 | 635.7035089 | 387.5394699 |
| 362.3761201 | 412.0382216 | 387.2071709 |
| 423.7013097 | 348.0708318 | 385.8860707 |
| 409.3655511 | 361.7466186 | 385.5560848 |
| 381.0922494 | 389.5393466 | 385.315798  |
| 391.8440684 | 378.5104862 | 385.1772773 |
| 393.0387149 | 376.7458686 | 384.8922917 |
| 389.8529908 | 379.3927951 | 384.6228929 |
| 340.4742667 | 426.5963172 | 383.535292  |
| 440.0281459 | 326.4542655 | 383.2412057 |
| 347.642146  | 418.2143834 | 382.9282647 |
| 312.5991806 | 442.4778761 | 377.5385283 |
| 561.4838784 | 192.7844784 | 377.1341784 |
| 490.203301  | 263.3691845 | 376.7862427 |
| 622.012637  | 131.464015  | 376.738326  |
| 182.7809221 | 570.4126558 | 376.596789  |
| 354.8100253 | 396.1566628 | 375.483344  |
| 494.9818872 | 255.4284051 | 375.2051461 |
| 512.9015854 | 234.6941476 | 373.7978665 |
| 577.4124991 | 164.1094416 | 370.7609703 |
| 362.3761201 | 376.7458686 | 369.5609944 |
| 314.5902581 | 423.0670819 | 368.82867   |
| 477.85862   | 249.2522433 | 363.5554316 |
| 432.0638355 | 294.6911478 | 363.3774917 |
| 393.0387149 | 332.6304273 | 362.8345711 |
| 594.5357663 | 126.6113165 | 360.5735414 |
| 49.37872406 | 666.1431634 | 357.7609437 |
| 286.715172  | 425.7140084 | 356.2145902 |
| 489.4068699 | 217.4891255 | 353.4479977 |
| 273.1758444 | 432.3313246 | 352.7535845 |
| 373.9243701 | 331.3069641 | 352.6156671 |
| 410.5601976 | 294.2499934 | 352.4050955 |
| 111.8985602 | 592.4703765 | 352.1844683 |
| 485.0264993 | 217.4891255 | 351.2578124 |
| 363.5707667 | 337.9242803 | 350.7475235 |
| 438.8334993 | 255.8695595 | 347.3515294 |
| 360.3850425 | 328.6600376 | 344.5225401 |
| 397.4190856 | 290.2796037 | 343.8493446 |
| 452.7710424 | 232.92953   | 342.8502862 |
| 561.4838784 | 119.9940003 | 340.7389394 |
| 159.6844222 | 520.5622072 | 340.1233147 |
| 273.1758444 | 404.5385966 | 338.8572205 |
| 275.963353  | 401.0093613 | 338.4863572 |

|             |             |             |
|-------------|-------------|-------------|
| 435.6477752 | 239.9880006 | 337.8178879 |
| 467.106801  | 206.4602652 | 336.7835331 |
| 301.8473616 | 369.687398  | 335.7673798 |
| 46.59121545 | 623.7923398 | 335.1917776 |
| 448.3906717 | 221.9006697 | 335.1456707 |
| 467.903232  | 202.0487211 | 334.9759766 |
| 500.5569044 | 168.0798313 | 334.3183679 |
| 478.655051  | 189.2552431 | 333.9551471 |
| 504.140844  | 163.6682872 | 333.9045656 |
| 473.8764648 | 193.6667872 | 333.771626  |
| 553.1213526 | 112.0532209 | 332.5872867 |
| 519.6712492 | 144.6986474 | 332.1849483 |
| 495.3801027 | 166.3152137 | 330.8476582 |
| 341.6689133 | 314.101942  | 327.8854276 |
| 332.5099564 | 322.0427214 | 327.2763389 |
| 293.8830513 | 358.6585377 | 326.2707945 |
| 236.9382324 | 414.6851481 | 325.8116902 |
| 546.7499043 | 104.1124414 | 325.4311729 |
| 395.428008  | 248.8110889 | 322.1195484 |
| 126.2343188 | 517.9152807 | 322.0747997 |
| 320.9617064 | 322.4838758 | 321.7227911 |
| 459.1424907 | 179.1086916 | 319.1255911 |
| 513.2998009 | 123.5232356 | 318.4115183 |
| 281.9365858 | 349.394295  | 315.6654404 |
| 428.8781114 | 199.842949  | 314.3605302 |
| 108.3146205 | 517.9152807 | 313.1149506 |
| 374.3225856 | 251.8991697 | 313.1108777 |
| 479.451482  | 145.5809562 | 312.5162191 |
| 298.263422  | 324.6896479 | 311.4765349 |
| 380.2958184 | 242.6349271 | 311.4653727 |
| 379.4993873 | 240.8703094 | 310.1848484 |
| 95.57172399 | 520.5622072 | 308.0669656 |
| 139.7736463 | 474.6821482 | 307.2278973 |
| 195.9220342 | 415.5674569 | 305.7447456 |
| 323.749215  | 287.6326772 | 305.6909461 |
| 206.2756376 | 402.3328245 | 304.3042311 |
| 174.4183963 | 429.2432437 | 301.83082   |
| 327.3331547 | 267.7807286 | 297.5569416 |
| 352.8189477 | 242.1937727 | 297.5063602 |
| 460.3371372 | 133.2286327 | 296.782885  |
| 347.2439305 | 246.1641624 | 296.7040464 |
| 141.7647239 | 450.85981   | 296.3122669 |
| 368.7475684 | 223.6652873 | 296.2064279 |
| 117.0753619 | 474.6821482 | 295.8787551 |
| 412.9494907 | 178.6675372 | 295.808514  |

|             |             |             |
|-------------|-------------|-------------|
| 512.5033699 | 78.08433108 | 295.2938505 |
| 346.0492839 | 243.5172359 | 294.7832599 |
| 422.9048787 | 165.8740592 | 294.3894689 |
| 356.8011029 | 229.8414491 | 293.321276  |
| 242.9114651 | 343.2181332 | 293.0647992 |
| 373.5261546 | 208.6660373 | 291.0960959 |
| 390.2512063 | 190.5787064 | 290.4149563 |
| 422.5066631 | 155.7275077 | 289.1170854 |
| 29.46794823 | 548.3549352 | 288.9114417 |
| 200.3024049 | 375.8635598 | 288.0829823 |
| 129.0218274 | 446.0071114 | 287.5144694 |
| 122.2521636 | 449.9775011 | 286.1148324 |
| 403.3923183 | 168.5209857 | 285.956652  |
| 457.5496286 | 112.4943753 | 285.0220019 |
| 103.5360343 | 457.9182806 | 280.7271574 |
| 437.2406373 | 123.96439   | 280.6025136 |
| 298.263422  | 261.1634124 | 279.7134172 |
| 352.4207322 | 206.9014196 | 279.6610759 |
| 13.53932757 | 544.3845455 | 278.9619365 |
| 121.8539481 | 434.0959423 | 277.9749452 |
| 71.28057748 | 483.9463909 | 277.6134842 |
| 440.8245769 | 114.2589929 | 277.5417849 |
| 457.1514131 | 94.40704435 | 275.7792287 |
| 151.3218963 | 397.0389716 | 274.1804339 |
| 370.738646  | 176.9029196 | 273.8207828 |
| 360.7832581 | 186.6083166 | 273.6957874 |
| 406.179827  | 140.7282577 | 273.4540423 |
| 397.4190856 | 148.6690371 | 273.0440614 |
| 179.595198  | 365.7170083 | 272.6561031 |
| 208.6649307 | 330.8658097 | 269.7653702 |
| 246.0971893 | 292.4853757 | 269.2912825 |
| 400.2065942 | 131.9051694 | 266.0558818 |
| 153.3129739 | 378.0693318 | 265.6911529 |
| 207.8684997 | 323.3661846 | 265.6173422 |
| 10.35360343 | 516.1506631 | 263.2521332 |
| 354.0135943 | 171.6090666 | 262.8113304 |
| 392.2422839 | 132.7874783 | 262.5148811 |
| 302.6437926 | 220.136052  | 261.3899223 |
| 271.1847668 | 249.6933977 | 260.4390823 |
| 101.9431723 | 418.2143834 | 260.0787778 |
| 136.1897067 | 383.3631848 | 259.7764457 |
| 33.84831891 | 483.9463909 | 258.8973549 |
| 203.8863445 | 313.6607875 | 258.773566  |
| 29.46794823 | 487.4756262 | 258.4717872 |
| 267.6008272 | 246.6053168 | 257.103072  |

|             |             |             |
|-------------|-------------|-------------|
| 113.8896378 | 395.7155083 | 254.802573  |
| 191.939879  | 317.6311773 | 254.7855281 |
| 113.4914222 | 394.8331995 | 254.1623109 |
| 93.18243089 | 415.1263025 | 254.1543667 |
| 242.9114651 | 259.8399492 | 251.3757072 |
| 13.53932757 | 487.9167806 | 250.7280541 |
| 212.2488704 | 287.1915228 | 249.7201966 |
| 286.3169565 | 209.5483461 | 247.9326513 |
| 373.1279391 | 122.6409268 | 247.8844329 |
| 187.9577238 | 303.9553905 | 245.9565572 |
| 136.5879222 | 352.0412215 | 244.3145718 |
| 373.9243701 | 114.7001473 | 244.3122587 |
| 8.760741366 | 477.3290747 | 243.044908  |
| 323.749215  | 160.1390519 | 241.9441334 |
| 357.9957494 | 124.8466988 | 241.4212241 |
| 385.4726201 | 95.28935318 | 240.3809866 |
| 395.428008  | 85.14280168 | 240.2854048 |
| 162.4719308 | 315.4254052 | 238.948668  |
| 240.9203876 | 236.0176109 | 238.4689992 |
| 149.3308187 | 326.8954199 | 238.1131193 |
| 41.01619821 | 433.6547878 | 237.335493  |
| 234.1507238 | 238.6645374 | 236.4076306 |
| 236.5400169 | 231.6060668 | 234.0730418 |
| 305.8295168 | 160.5802063 | 233.2048615 |
| 111.1021291 | 354.2469935 | 232.6745613 |
| 263.618672  | 201.1664123 | 232.3925421 |
| 162.8701463 | 298.6615375 | 230.7658419 |
| 267.6008272 | 193.6667872 | 230.6338072 |
| 267.9990427 | 193.2256328 | 230.6123378 |
| 172.0291032 | 288.9561404 | 230.4926218 |
| 180.391629  | 279.2507433 | 229.8211862 |
| 300.2544995 | 159.256743  | 229.7556213 |
| 150.9236808 | 306.6023169 | 228.7629989 |
| 26.2822241  | 430.566707  | 228.4244655 |
| 355.6064563 | 96.61281642 | 226.1096364 |
| 163.2683618 | 285.8680595 | 224.5682107 |
| 277.1579996 | 169.844449  | 223.5012243 |
| 9.158956882 | 436.7428687 | 222.9509128 |
| 129.0218274 | 315.8665596 | 222.4441935 |
| 205.0809911 | 238.6645374 | 221.8727642 |
| 220.6113962 | 222.7829785 | 221.6971874 |
| 235.7435858 | 207.342574  | 221.5430799 |
| 317.7759823 | 125.2878533 | 221.5319178 |
| 82.43061194 | 359.5408465 | 220.9857292 |
| 280.7419392 | 160.1390519 | 220.4404955 |

|             |             |             |
|-------------|-------------|-------------|
| 7.964310333 | 431.8901702 | 219.9272403 |
| 347.642146  | 91.31896346 | 219.4805547 |
| 68.09485334 | 369.2462436 | 218.6705485 |
| 134.1986291 | 302.1907728 | 218.194701  |
| 267.2026117 | 168.9621401 | 218.0823759 |
| 280.7419392 | 152.6394269 | 216.690683  |
| 330.1206633 | 101.9066694 | 216.0136663 |
| 205.8774221 | 224.1064417 | 214.9919319 |
| 279.9455082 | 149.9925004 | 214.9690043 |
| 181.5862756 | 247.4876256 | 214.5369506 |
| 266.0079651 | 162.7859783 | 214.3969717 |
| 168.046948  | 260.722258  | 214.384603  |
| 275.166922  | 152.1982724 | 213.6825972 |
| 196.7184652 | 228.9591403 | 212.8388027 |
| 266.8043961 | 158.3744342 | 212.5894152 |
| 216.629241  | 206.0191108 | 211.3241759 |
| 295.8741289 | 126.6113165 | 211.2427227 |
| 276.7597841 | 145.5809562 | 211.1703702 |
| 203.8863445 | 217.0479711 | 210.4671578 |
| 185.5684307 | 234.2529932 | 209.910712  |
| 260.8311634 | 157.4921254 | 209.1616444 |
| 356.8011029 | 60.87930898 | 208.8402059 |
| 216.2310255 | 201.1664123 | 208.6987189 |
| 143.7558015 | 267.3395742 | 205.5476879 |
| 213.0453014 | 195.4314049 | 204.2383531 |
| 224.1953359 | 183.9613902 | 204.078363  |
| 23.892931   | 382.480876  | 203.1869035 |
| 244.9025427 | 161.4625151 | 203.1825289 |
| 207.0720686 | 198.9606402 | 203.0163544 |
| 5.176801716 | 400.1270525 | 202.6519271 |
| 144.154017  | 259.3987948 | 201.7764059 |
| 211.8506548 | 191.0198608 | 201.4352578 |
| 103.1378188 | 296.8969199 | 200.0173693 |
| 109.1110516 | 290.2796037 | 199.6953276 |
| 289.1044651 | 109.8474488 | 199.4759569 |
| 195.9220342 | 202.4898755 | 199.2059548 |
| 153.7111894 | 244.3995447 | 199.0553671 |
| 195.9220342 | 202.0487211 | 198.9853776 |
| 154.5076205 | 242.1937727 | 198.3506966 |
| 171.6308877 | 224.5475961 | 198.0892419 |
| 13.53932757 | 381.1574127 | 197.3483701 |
| 56.54660336 | 337.9242803 | 197.2354418 |
| 222.6024738 | 171.6090666 | 197.1057702 |
| 232.9560772 | 160.5802063 | 196.7681418 |
| 229.3721376 | 164.1094416 | 196.7407896 |



|             |             |             |
|-------------|-------------|-------------|
| 151.7201118 | 240.429155  | 196.0746334 |
| 239.725741  | 152.1982724 | 195.9620067 |
| 187.5595083 | 201.6075667 | 194.5835375 |
| 70.48414644 | 317.6311773 | 194.0576619 |
| 328.9260167 | 59.11469132 | 194.020354  |
| 202.691698  | 185.2848534 | 193.9882757 |
| 175.6130428 | 211.7541182 | 193.6835805 |
| 273.9722754 | 112.4943753 | 193.2333254 |
| 255.6543617 | 130.5817062 | 193.1180339 |
| 232.1596462 | 153.9628901 | 193.0612681 |
| 250.47756   | 135.4344048 | 192.9559824 |
| 107.119974  | 277.9272801 | 192.523627  |
| 249.2829134 | 132.7874783 | 191.0351958 |
| 323.3509995 | 56.46776485 | 189.9093822 |
| 29.06973271 | 349.8354494 | 189.4525911 |
| 29.46794823 | 348.5119862 | 188.9899672 |
| 255.6543617 | 121.758618  | 188.7064898 |
| 144.5522325 | 230.7237579 | 187.6379952 |
| 294.2812668 | 78.52548549 | 186.4033761 |
| 188.3559394 | 183.5202358 | 185.9380876 |
| 216.629241  | 154.4040445 | 185.5166428 |
| 228.9739221 | 141.1694121 | 185.0716671 |
| 13.53932757 | 356.0116112 | 184.7754694 |
| 127.8271808 | 241.3114638 | 184.5693223 |
| 196.3202497 | 172.4913754 | 184.4058126 |
| 242.5132496 | 126.1701621 | 184.3417059 |
| 252.8668531 | 114.2589929 | 183.562923  |
| 277.5562151 | 88.67203699 | 183.114126  |
| 314.5902581 | 50.73275748 | 182.6615078 |
| 193.5327411 | 171.1679122 | 182.3503266 |
| 234.9471548 | 124.4055444 | 179.6763496 |
| 146.5433101 | 210.8718094 | 178.7075597 |
| 283.5294478 | 72.79047812 | 178.159963  |
| 191.5416635 | 164.550596  | 178.0461297 |
| 209.4613617 | 146.0221107 | 177.7417362 |
| 174.8166118 | 179.9910004 | 177.4038061 |
| 40.6179827  | 311.8961699 | 176.2570763 |
| 143.357586  | 208.2248829 | 175.7912344 |
| 82.82882746 | 268.221883  | 175.5253552 |
| 223.0006893 | 127.9347797 | 175.4677345 |
| 131.4111205 | 219.2537432 | 175.3324318 |
| 58.93589646 | 291.6030669 | 175.2694817 |
| 207.4702842 | 142.0517209 | 174.7610026 |
| 142.9593705 | 206.4602652 | 174.7098178 |
| 102.7396033 | 245.723008  | 174.2313056 |

|             |             |             |
|-------------|-------------|-------------|
| 323.749215  | 24.26349271 | 174.0063539 |
| 196.7184652 | 150.8748092 | 173.7966372 |
| 206.2756376 | 140.7282577 | 173.5019477 |
| 212.2488704 | 134.5520959 | 173.4004831 |
| 209.0631462 | 134.9932503 | 172.0281983 |
| 179.595198  | 163.2271328 | 171.4111654 |
| 199.5059738 | 142.4928754 | 170.9994246 |
| 133.4021981 | 207.342574  | 170.3723861 |
| 123.8450257 | 214.4010447 | 169.1230352 |
| 214.6381635 | 118.2293826 | 166.4337731 |
| 264.0168875 | 67.93777958 | 165.9773336 |
| 281.9365858 | 49.85044865 | 165.8935172 |
| 163.6665773 | 166.3152137 | 164.9908955 |
| 62.91805163 | 266.4572654 | 164.6876585 |
| 161.6754998 | 167.6386769 | 164.6570883 |
| 246.4954048 | 79.40779432 | 162.9515996 |
| 168.843379  | 157.050971  | 162.947175  |
| 128.2253964 | 197.637177  | 162.9312867 |
| 256.8490082 | 67.49662517 | 162.1728167 |
| 77.65202574 | 245.723008  | 161.6875169 |
| 221.0096117 | 101.465515  | 161.2375633 |
| 103.5360343 | 218.8125888 | 161.1743116 |
| 56.94481888 | 263.8103389 | 160.3775789 |
| 161.6754998 | 158.3744342 | 160.024967  |
| 178.0023359 | 138.0813312 | 158.0418336 |
| 87.60741366 | 226.3122138 | 156.9598137 |
| 203.0899135 | 110.7297576 | 156.9098356 |
| 73.27165506 | 240.429155  | 156.850405  |
| 208.6649307 | 102.3478238 | 155.5063772 |
| 281.5383703 | 29.11619125 | 155.3272808 |
| 130.2164739 | 180.4321549 | 155.3243144 |
| 170.0380256 | 138.0813312 | 154.0596784 |
| 178.798767  | 129.258243  | 154.028505  |
| 265.2115341 | 42.35082364 | 153.7811789 |
| 95.17350847 | 211.7541182 | 153.4638133 |
| 143.357586  | 161.0213607 | 152.1894733 |
| 74.46630161 | 229.4002947 | 151.9332982 |
| 196.7184652 | 106.7593679 | 151.7389166 |
| 188.3559394 | 113.8178385 | 151.0868889 |
| 170.8344566 | 130.5817062 | 150.7080814 |
| 149.3308187 | 150.8748092 | 150.102814  |
| 166.0558704 | 132.3463239 | 149.2010971 |
| 252.070422  | 46.32121335 | 149.1958177 |
| 156.498698  | 141.6105665 | 149.0546323 |
| 123.0485946 | 174.6971475 | 148.8728711 |

|             |             |             |
|-------------|-------------|-------------|
| 136.5879222 | 161.0213607 | 148.8046414 |
| 163.6665773 | 133.2286327 | 148.447605  |
| 112.6949912 | 183.9613902 | 148.3281907 |
| 204.6827755 | 91.31896346 | 148.0008695 |
| 119.464655  | 175.1383019 | 147.3014784 |
| 134.1986291 | 159.6978975 | 146.9482633 |
| 206.2756376 | 86.46626492 | 146.3709513 |
| 166.0558704 | 126.6113165 | 146.3335935 |
| 181.9844911 | 109.4062944 | 145.6953927 |
| 152.1183274 | 138.5224856 | 145.3204065 |
| 117.4735774 | 171.6090666 | 144.541322  |
| 124.2432412 | 164.550596  | 144.3969186 |
| 66.90020679 | 221.0183608 | 143.9592838 |
| 182.7809221 | 104.5535958 | 143.667259  |
| 154.1094049 | 131.0228606 | 142.5661328 |
| 151.3218963 | 133.2286327 | 142.2752645 |
| 8.362525849 | 275.721508  | 142.0420169 |
| 91.58956882 | 191.0198608 | 141.3047148 |
| 219.4167497 | 62.64392663 | 141.0303381 |
| 237.3364479 | 44.11544129 | 140.7259446 |
| 144.5522325 | 136.3167136 | 140.4344731 |
| 70.88236196 | 208.6660373 | 139.7741996 |
| 165.6576549 | 113.8178385 | 139.7377467 |
| 59.33411198 | 220.136052  | 139.735082  |
| 28.27330168 | 250.1345521 | 139.2039269 |
| 213.4435169 | 64.40854428 | 138.9260306 |
| 71.28057748 | 206.4602652 | 138.8704213 |
| 228.9739221 | 48.52698542 | 138.7504537 |
| 70.48414644 | 206.9014196 | 138.692783  |
| 122.6503791 | 153.9628901 | 138.3066346 |
| 62.12162059 | 213.5187358 | 137.8201782 |
| 160.4808532 | 114.7001473 | 137.5905003 |
| 158.0915601 | 116.9059194 | 137.4987398 |
| 98.75744812 | 174.6971475 | 136.7272978 |
| 119.8628705 | 153.5217357 | 136.6923031 |
| 92.78421537 | 180.4321549 | 136.6081851 |
| 96.76637054 | 176.0206107 | 136.3934906 |
| 159.6844222 | 111.170912  | 135.4276671 |
| 111.8985602 | 158.8155886 | 135.3570744 |
| 45.3965689  | 224.9887506 | 135.1926597 |
| 200.3024049 | 69.70239723 | 135.002401  |
| 17.52148273 | 251.4580153 | 134.489749  |
| 189.5505859 | 78.9666399  | 134.2586129 |
| 62.51983611 | 205.5779564 | 134.0488963 |
| 164.0647929 | 103.671287  | 133.8680399 |

|             |             |             |
|-------------|-------------|-------------|
| 60.13054301 | 207.342574  | 133.7365585 |
| 58.93589646 | 208.2248829 | 133.5803897 |
| 209.8595773 | 56.02661043 | 132.9430938 |
| 123.4468102 | 142.0517209 | 132.7492655 |
| 99.55387916 | 164.1094416 | 131.8316604 |
| 197.5148962 | 65.73200752 | 131.6234519 |
| 84.81990504 | 177.7852284 | 131.3025667 |
| 140.1718619 | 122.1997724 | 131.1858171 |
| 108.3146205 | 153.9628901 | 131.1387553 |
| 184.3737842 | 77.64317666 | 131.0084804 |
| 179.1969825 | 82.49587521 | 130.8464288 |
| 3.58393965  | 258.0753315 | 130.8296356 |
| 103.5360343 | 157.9332798 | 130.7346571 |
| 140.5700774 | 120.4351547 | 130.502616  |
| 230.1685686 | 29.55734566 | 129.8629571 |
| 149.3308187 | 108.96514   | 129.1479794 |
| 174.8166118 | 83.37818403 | 129.0973979 |
| 48.58229303 | 209.5483461 | 129.0653196 |
| 109.9074826 | 147.7867283 | 128.8471054 |
| 159.6844222 | 97.93627966 | 128.8103509 |
| 191.143448  | 66.17316193 | 128.658305  |
| 164.8612239 | 92.20127229 | 128.5312481 |
| 178.4005514 | 78.52548549 | 128.4630185 |
| 81.23596539 | 175.5794563 | 128.4077109 |
| 229.3721376 | 27.3515736  | 128.3618556 |
| 93.18243089 | 162.7859783 | 127.9842046 |
| 173.6219652 | 78.9666399  | 126.2943026 |
| 131.4111205 | 119.9940003 | 125.7025604 |
| 95.96993951 | 154.4040445 | 125.186992  |
| 92.38599986 | 157.9332798 | 125.1596398 |
| 163.2683618 | 86.90741933 | 125.0878906 |
| 242.9114651 | 6.17616178  | 124.5438135 |
| 60.52875853 | 188.3729343 | 124.4508464 |
| 86.41276711 | 162.3448239 | 124.3787955 |
| 87.60741366 | 161.0213607 | 124.3143872 |
| 115.0842843 | 133.2286327 | 124.1564585 |
| 64.51091369 | 183.5202358 | 124.0155747 |
| 187.5595083 | 60.43815456 | 123.9988314 |
| 168.046948  | 78.9666399  | 123.506794  |
| 49.77693958 | 196.7548681 | 123.2659039 |
| 135.3932757 | 110.7297576 | 123.0615166 |
| 89.59849124 | 154.8451989 | 122.2218451 |
| 19.1143448  | 224.9887506 | 122.0515477 |
| 90.39492227 | 152.6394269 | 121.5171746 |
| 189.9488014 | 51.61506631 | 120.7819339 |

|             |             |             |
|-------------|-------------|-------------|
| 71.67879299 | 169.4032945 | 120.5410438 |
| 143.357586  | 96.61281642 | 119.9852012 |
| 77.65202574 | 161.4625151 | 119.5572704 |
| 168.4451635 | 70.14355165 | 119.2943576 |
| 115.0842843 | 123.0820812 | 119.0831827 |
| 142.9593705 | 94.40704435 | 118.6832074 |
| 114.6860688 | 122.6409268 | 118.6634978 |
| 78.44845678 | 157.9332798 | 118.1908683 |
| 134.5968446 | 101.465515  | 118.0311798 |
| 135.3932757 | 99.70089731 | 117.5470865 |
| 199.1077583 | 35.73350744 | 117.4206329 |
| 123.8450257 | 110.7297576 | 117.2873917 |
| 62.91805163 | 171.1679122 | 117.0429819 |
| 109.1110516 | 124.8466988 | 116.9788752 |
| 149.7290343 | 83.37818403 | 116.5536091 |
| 119.8628705 | 112.4943753 | 116.1786229 |
| 116.6771464 | 115.1413018 | 115.9092241 |
| 140.9682929 | 90.43665464 | 115.7024738 |
| 66.10377576 | 164.550596  | 115.3271859 |
| 89.59849124 | 140.7282577 | 115.1633745 |
| 215.4345945 | 14.11694121 | 114.7757679 |
| 101.5449567 | 127.9347797 | 114.7398682 |
| 151.7201118 | 77.64317666 | 114.6816442 |
| 175.6130428 | 52.93852954 | 114.2757862 |
| 142.1629394 | 85.5839561  | 113.8734478 |
| 84.42168952 | 142.9340298 | 113.6778596 |
| 55.75017233 | 171.1679122 | 113.4590423 |
| 76.05916368 | 149.9925004 | 113.025832  |
| 50.57337061 | 174.2559931 | 112.4146818 |
| 157.6933446 | 66.61431634 | 112.1538305 |
| 185.1702152 | 38.82158833 | 111.9959018 |
| 62.91805163 | 160.5802063 | 111.749129  |
| 105.5271119 | 117.3470738 | 111.4370929 |
| 115.8807153 | 106.7593679 | 111.3200416 |
| 180.7898445 | 41.46851481 | 111.1291797 |
| 99.15566364 | 121.758618  | 110.4571408 |
| 128.6236119 | 92.20127229 | 110.4124421 |
| 24.68936203 | 195.4314049 | 110.0603835 |
| 74.46630161 | 145.1398018 | 109.8030517 |
| 67.69663783 | 151.757118  | 109.7268779 |
| 50.17515509 | 164.550596  | 107.3628755 |
| 152.9147584 | 61.7616178  | 107.3381881 |
| 108.3146205 | 106.3182135 | 107.316417  |
| 94.77529296 | 119.5528459 | 107.1640694 |
| 5.176801716 | 209.1071917 | 107.1419967 |

|             |             |             |
|-------------|-------------|-------------|
| 81.23596539 | 132.7874783 | 107.0117218 |
| 145.3486636 | 67.93777958 | 106.6432216 |
| 53.36087923 | 159.256743  | 106.3088111 |
| 115.0842843 | 95.28935318 | 105.1868187 |
| 121.0575171 | 88.67203699 | 104.864777  |
| 38.2286896  | 171.1679122 | 104.6983009 |
| 140.5700774 | 68.37893399 | 104.4745057 |
| 96.36815502 | 112.0532209 | 104.2106879 |
| 103.5360343 | 104.5535958 | 104.0448151 |
| 133.4021981 | 74.55509577 | 103.9786469 |
| 126.2343188 | 81.61356638 | 103.9239426 |
| 25.88400858 | 181.3144637 | 103.5992361 |
| 128.2253964 | 78.9666399  | 103.5960181 |
| 143.7558015 | 61.7616178  | 102.7587097 |
| 146.5433101 | 57.35007367 | 101.9466919 |
| 99.15566364 | 104.5535958 | 101.8546297 |
| 73.27165506 | 130.1405518 | 101.7061034 |
| 116.6771464 | 86.46626492 | 101.5717056 |
| 142.9593705 | 59.99700015 | 101.4781853 |
| 115.4824998 | 87.34857375 | 101.4155368 |
| 39.82155166 | 162.7859783 | 101.303765  |
| 80.83774988 | 121.758618  | 101.2981839 |
| 51.36980164 | 150.8748092 | 101.1223054 |
| 11.9464655  | 189.6963975 | 100.8214315 |
| 33.4501034  | 168.0798313 | 100.7649673 |
| 42.21084476 | 158.3744342 | 100.2926395 |
| 68.89128438 | 131.464015  | 100.1776497 |
| 134.5968446 | 64.84969869 | 99.72327166 |
| 44.99835338 | 154.4040445 | 99.70119894 |
| 89.59849124 | 109.4062944 | 99.50239282 |
| 50.17515509 | 148.6690371 | 99.42209612 |
| 41.01619821 | 157.4921254 | 99.2541618  |
| 172.4273187 | 26.02811036 | 99.22771453 |
| 58.53768094 | 139.4047945 | 98.97123771 |
| 82.82882746 | 114.7001473 | 98.7644874  |
| 56.54660336 | 140.2871033 | 98.41685333 |
| 169.6398101 | 25.58695595 | 97.61338301 |
| 48.58229303 | 146.4632651 | 97.52277905 |
| 126.6325343 | 68.37893399 | 97.50573414 |
| 33.84831891 | 161.0213607 | 97.4348398  |
| 128.6236119 | 65.73200752 | 97.17780969 |
| 86.41276711 | 107.6416767 | 97.02722192 |
| 100.3503102 | 93.08358112 | 96.71694565 |
| 116.6771464 | 76.31971343 | 96.4984299  |
| 144.154017  | 48.085831   | 96.11992401 |

|             |             |             |
|-------------|-------------|-------------|
| 150.9236808 | 40.58620598 | 95.75494339 |
| 19.1143448  | 172.050221  | 95.58228291 |
| 104.3324654 | 86.46626492 | 95.39936514 |
| 54.55552578 | 135.8755592 | 95.21554247 |
| 41.41441373 | 148.6690371 | 95.04172543 |
| 108.3146205 | 81.61356638 | 94.96409345 |
| 101.9431723 | 87.78972816 | 94.86645021 |
| 5.176801716 | 184.4025446 | 94.78967315 |
| 157.6933446 | 31.76311773 | 94.72823116 |
| 158.8879911 | 30.43965449 | 94.66382281 |
| 151.3218963 | 37.05697068 | 94.1894335  |
| 113.0932067 | 74.99625019 | 94.04472845 |
| 22.69828445 | 164.9917504 | 93.84501743 |
| 128.6236119 | 58.67353691 | 93.64857439 |
| 41.01619821 | 146.0221107 | 93.51915444 |
| 111.5003447 | 74.99625019 | 93.24829742 |
| 15.92862067 | 170.2856034 | 93.10711202 |
| 81.63418091 | 104.5535958 | 93.09388838 |
| 131.809336  | 53.82083837 | 92.81508719 |
| 63.31626714 | 122.1997724 | 92.75801975 |
| 63.71448266 | 121.758618  | 92.73655031 |
| 103.1378188 | 81.61356638 | 92.37569259 |
| 86.01455159 | 98.37743407 | 92.19599283 |
| 82.43061194 | 101.9066694 | 92.16864066 |
| 46.19299993 | 138.0813312 | 92.13716558 |
| 60.92697404 | 122.6409268 | 91.78395041 |
| 64.11269818 | 119.1116915 | 91.61219483 |
| 157.6933446 | 25.14580153 | 91.41957306 |
| 175.6130428 | 7.058470606 | 91.33575672 |
| 109.5092671 | 72.34932371 | 90.92929539 |
| 88.40384469 | 93.08358112 | 90.7437129  |
| 10.35360343 | 170.7267578 | 90.54018061 |
| 125.8361033 | 55.14430161 | 90.49020243 |
| 127.0307498 | 53.82083837 | 90.42579409 |
| 95.96993951 | 84.70164727 | 90.33579339 |
| 48.18407751 | 131.464015  | 89.82404627 |
| 115.4824998 | 63.96738987 | 89.72494484 |
| 119.8628705 | 59.55584574 | 89.70935812 |
| 51.36980164 | 127.9347797 | 89.65229069 |
| 35.44118098 | 143.8163386 | 89.62875979 |
| 97.96101709 | 81.17241197 | 89.56671453 |
| 71.67879299 | 106.7593679 | 89.21908045 |
| 6.371448266 | 172.050221  | 89.21083464 |
| 104.7306809 | 73.23163254 | 88.9811567  |
| 64.11269818 | 113.8178385 | 88.96526835 |

|             |             |             |
|-------------|-------------|-------------|
| 85.21812056 | 92.20127229 | 88.70969642 |
| 51.36980164 | 125.7290077 | 88.54940466 |
| 29.06973271 | 146.4632651 | 87.76649889 |
| 82.43061194 | 92.20127229 | 87.31594212 |
| 133.4021981 | 41.0273604  | 87.21477923 |
| 82.03239643 | 91.76011788 | 86.89625715 |
| 5.176801716 | 168.5209857 | 86.84889372 |
| 91.19135331 | 82.49587521 | 86.84361426 |
| 1.991077583 | 171.6090666 | 86.80007209 |
| 57.74124991 | 115.5824562 | 86.66185304 |
| 43.80370683 | 129.258243  | 86.5309749  |
| 27.47687065 | 145.5809562 | 86.52891345 |
| 73.27165506 | 99.70089731 | 86.48627618 |
| 57.34303439 | 114.7001473 | 86.02159087 |
| 61.32518956 | 109.8474488 | 85.58631918 |
| 78.05024126 | 92.6424267  | 85.34633398 |
| 46.98943096 | 123.5232356 | 85.25633328 |
| 69.28949989 | 100.5832061 | 84.93635301 |
| 105.5271119 | 63.96738987 | 84.74725089 |
| 59.33411198 | 109.8474488 | 84.59078039 |
| 122.6503791 | 46.32121335 | 84.48579624 |
| 119.8628705 | 48.085831   | 83.97435075 |
| 23.49471548 | 144.257493  | 83.87610424 |
| 72.87343954 | 94.84819877 | 83.86081915 |
| 60.52875853 | 106.7593679 | 83.64406322 |
| 21.5036379  | 144.6986474 | 83.10114266 |
| 88.00562917 | 77.64317666 | 82.82440292 |
| 15.53040515 | 149.551346  | 82.54087556 |
| 100.3503102 | 64.40854428 | 82.37942723 |
| 41.01619821 | 123.5232356 | 82.26971691 |
| 74.46630161 | 89.99550022 | 82.23090092 |
| 70.88236196 | 93.08358112 | 81.98297154 |
| 147.7379567 | 15.88155886 | 81.80975777 |
| 55.75017233 | 107.6416767 | 81.69592453 |
| 81.63418091 | 81.61356638 | 81.62387364 |
| 83.22704298 | 79.84894873 | 81.53799585 |
| 83.62525849 | 79.40779432 | 81.5165264  |
| 33.05188788 | 129.6993974 | 81.37564263 |
| 37.83047408 | 124.8466988 | 81.33858646 |
| 68.09485334 | 94.40704435 | 81.25094885 |
| 138.9772153 | 23.38118388 | 81.17919959 |
| 117.4735774 | 44.5565957  | 81.01508655 |
| 113.4914222 | 48.085831   | 80.78862662 |
| 17.91969825 | 143.3751842 | 80.64744122 |
| 66.50199128 | 94.40704435 | 80.45451782 |



|             |             |             |
|-------------|-------------|-------------|
| 73.27165506 | 87.34857375 | 80.3101144  |
| 86.01455159 | 74.55509577 | 80.28482368 |
| 53.75909474 | 105.8770591 | 79.81807692 |
| 54.15731026 | 104.5535958 | 79.35545306 |
| 9.955387916 | 148.6690371 | 79.31221253 |
| 75.66094816 | 82.93702962 | 79.29898889 |
| 101.9431723 | 56.46776485 | 79.20546855 |
| 11.15003447 | 146.4632651 | 78.80664977 |
| 68.49306886 | 89.1131914  | 78.80313013 |
| 64.51091369 | 93.08358112 | 78.7972474  |
| 13.93754308 | 142.0517209 | 77.99463201 |
| 23.09649996 | 132.7874783 | 77.94198912 |
| 49.37872406 | 106.3182135 | 77.84846878 |
| 106.3235429 | 48.96813983 | 77.64584138 |
| 63.31626714 | 91.31896346 | 77.3176153  |
| 43.40549131 | 111.170912  | 77.28820168 |
| 75.26273264 | 78.52548549 | 76.89410907 |
| 94.77529296 | 58.67353691 | 76.72441493 |
| 102.7396033 | 50.29160307 | 76.51560318 |
| 50.17515509 | 102.7889782 | 76.48206665 |
| 26.68043961 | 126.1701621 | 76.42530085 |
| 37.43225856 | 114.7001473 | 76.06620295 |
| 39.82155166 | 112.0532209 | 75.93738627 |
| 26.2822241  | 125.2878533 | 75.78503868 |
| 122.2521636 | 26.91041918 | 74.58129139 |
| 15.92862067 | 133.2286327 | 74.57862668 |
| 6.371448266 | 142.4928754 | 74.43216181 |
| 20.30899135 | 128.3759341 | 74.34246275 |
| 99.15566364 | 49.40929424 | 74.28247894 |
| 32.65367236 | 115.1413018 | 73.89748706 |
| 82.82882746 | 64.84969869 | 73.83926307 |
| 82.82882746 | 64.84969869 | 73.83926307 |
| 5.973232749 | 141.6105665 | 73.79189964 |
| 93.58064641 | 53.37968396 | 73.48016518 |
| 137.7825688 | 8.381933844 | 73.0822513  |
| 119.0664395 | 26.91041918 | 72.98842933 |
| 76.05916368 | 69.70239723 | 72.88078045 |
| 13.93754308 | 131.0228606 | 72.48020185 |
| 121.4557326 | 23.38118388 | 72.41845823 |
| 77.65202574 | 66.61431634 | 72.13317104 |
| 58.93589646 | 85.14280168 | 72.03934907 |
| 61.72340508 | 82.05472079 | 71.88906294 |
| 12.74289653 | 131.0228606 | 71.88287858 |
| 103.1378188 | 40.58620598 | 71.8620124  |
| 87.60741366 | 56.02661043 | 71.81701205 |

|             |             |             |
|-------------|-------------|-------------|
| 59.73232749 | 83.81933844 | 71.77583297 |
| 64.51091369 | 78.9666399  | 71.7387768  |
| 16.32683618 | 126.6113165 | 71.46907634 |
| 107.5181895 | 35.29235303 | 71.40527126 |
| 57.34303439 | 85.14280168 | 71.24291804 |
| 72.07700851 | 69.26124282 | 70.66912566 |
| 25.08757755 | 116.0236106 | 70.55559407 |
| 109.1110516 | 31.76311773 | 70.43708464 |
| 39.82155166 | 100.1420517 | 69.98180169 |
| 60.92697404 | 78.08433108 | 69.50565256 |
| 86.81098262 | 51.61506631 | 69.21302447 |
| 64.90912921 | 72.34932371 | 68.62922646 |
| 70.08593093 | 66.61431634 | 68.35012363 |
| 52.96266371 | 83.37818403 | 68.17042387 |
| 76.85559471 | 58.67353691 | 67.76456581 |
| 41.41441373 | 93.96588994 | 67.69015183 |
| 116.2789309 | 18.96963975 | 67.6242853  |
| 43.0072758  | 91.76011788 | 67.38369684 |
| 27.47687065 | 107.2005223 | 67.33869649 |
| 27.87508616 | 105.8770591 | 66.87607263 |
| 1.19464655  | 132.3463239 | 66.77048521 |
| 10.75181895 | 122.6409268 | 66.69637286 |
| 27.87508616 | 104.9947503 | 66.43491821 |
| 45.79478441 | 86.46626492 | 66.13052467 |
| 110.3056981 | 21.61656623 | 65.96113217 |
| 25.08757755 | 105.8770591 | 65.48231832 |
| 63.31626714 | 67.49662517 | 65.40644616 |
| 27.47687065 | 103.2301326 | 65.35350163 |
| 72.87343954 | 57.35007367 | 65.11175661 |
| 27.87508616 | 101.9066694 | 64.89087777 |
| 28.27330168 | 101.465515  | 64.86940832 |
| 37.03404305 | 92.20127229 | 64.61765767 |
| 76.45737919 | 52.49737513 | 64.47737716 |
| 107.5181895 | 21.17541182 | 64.34680065 |
| 82.43061194 | 45.88005894 | 64.15533544 |
| 5.176801716 | 123.0820812 | 64.12944145 |
| 95.17350847 | 32.20427214 | 63.68889031 |
| 77.65202574 | 49.40929424 | 63.53065999 |
| 36.63582753 | 89.1131914  | 62.87450946 |
| 57.34303439 | 68.37893399 | 62.86098419 |
| 13.53932757 | 112.0532209 | 62.79627422 |
| 94.37707744 | 30.8808089  | 62.62894317 |
| 53.75909474 | 71.46701488 | 62.61305481 |
| 87.20919814 | 37.49812509 | 62.35366162 |
| 52.56444819 | 71.9081693  | 62.23630875 |

|             |             |             |
|-------------|-------------|-------------|
| 63.71448266 | 60.43815456 | 62.07631861 |
| 59.73232749 | 64.40854428 | 62.07043589 |
| 57.74124991 | 65.2908531  | 61.51605151 |
| 39.02512063 | 83.81933844 | 61.42222954 |
| 62.51983611 | 59.55584574 | 61.03784092 |
| 34.24653443 | 87.78972816 | 61.0181313  |
| 43.40549131 | 78.52548549 | 60.9654884  |
| 69.28949989 | 51.17391189 | 60.23170589 |
| 83.22704298 | 37.05697068 | 60.14200683 |
| 55.75017233 | 63.96738987 | 59.8587811  |
| 62.12162059 | 57.35007367 | 59.73584713 |
| 21.5036379  | 97.93627966 | 59.71995878 |
| 25.88400858 | 93.08358112 | 59.48379485 |
| 68.89128438 | 49.85044865 | 59.37086652 |
| 48.58229303 | 70.14355165 | 59.36292234 |
| 64.51091369 | 52.93852954 | 58.72472162 |
| 41.41441373 | 75.87855901 | 58.64648637 |
| 48.18407751 | 68.82008841 | 58.50208296 |
| 25.08757755 | 91.76011788 | 58.42384771 |
| 40.21976718 | 75.87855901 | 58.0491631  |
| 69.68771541 | 45.88005894 | 57.78388717 |
| 37.43225856 | 78.08433108 | 57.75829482 |
| 29.46794823 | 86.02511051 | 57.74652937 |
| 65.70556024 | 49.40929424 | 57.55742724 |
| 49.37872406 | 65.2908531  | 57.33478858 |
| 82.43061194 | 31.76311773 | 57.09686483 |
| 42.60906028 | 71.46701488 | 57.03803758 |
| 96.36815502 | 17.64617651 | 57.00716577 |
| 56.14838784 | 57.79122809 | 56.96980797 |
| 53.75909474 | 59.99700015 | 56.87804745 |
| 71.28057748 | 42.35082364 | 56.81570056 |
| 54.95374129 | 58.2323825  | 56.5930619  |
| 66.50199128 | 45.88005894 | 56.19102511 |
| 22.69828445 | 89.1131914  | 55.90573792 |
| 52.96266371 | 58.67353691 | 55.81810031 |
| 87.20919814 | 24.26349271 | 55.73634542 |
| 41.01619821 | 70.14355165 | 55.57987493 |
| 71.28057748 | 39.70389716 | 55.49223732 |
| 75.66094816 | 35.29235303 | 55.47665059 |
| 101.9431723 | 8.381933844 | 55.16255305 |
| 10.35360343 | 99.70089731 | 55.02725037 |
| 20.70720686 | 88.67203699 | 54.68962193 |
| 37.83047408 | 71.02586047 | 54.42816728 |
| 29.86616375 | 78.9666399  | 54.41640183 |
| 39.02512063 | 69.70239723 | 54.36375893 |

|             |             |             |
|-------------|-------------|-------------|
| 68.49306886 | 40.14505157 | 54.31906022 |
| 81.63418091 | 26.91041918 | 54.27230005 |
| 39.02512063 | 68.82008841 | 53.92260452 |
| 68.89128438 | 37.93927951 | 53.41528194 |
| 46.59121545 | 59.99700015 | 53.2941078  |
| 30.26437926 | 76.31971343 | 53.29204634 |
| 20.30899135 | 86.02511051 | 53.16705093 |
| 62.91805163 | 43.23313246 | 53.07559204 |
| 64.51091369 | 41.46851481 | 52.98971425 |
| 36.23761201 | 69.70239723 | 52.97000462 |
| 89.59849124 | 16.32271328 | 52.96060226 |
| 38.2286896  | 67.05547076 | 52.64208018 |
| 64.51091369 | 40.14505157 | 52.32798263 |
| 62.51983611 | 41.46851481 | 51.99417546 |
| 46.59121545 | 57.35007367 | 51.97064456 |
| 23.892931   | 79.84894873 | 51.87093986 |
| 51.76801716 | 51.61506631 | 51.69154173 |
| 19.51256031 | 83.81933844 | 51.66594938 |
| 38.62690511 | 64.40854428 | 51.5177247  |
| 59.33411198 | 42.79197805 | 51.06304501 |
| 45.3965689  | 56.02661043 | 50.71158966 |
| 28.27330168 | 72.79047812 | 50.5318899  |
| 37.03404305 | 63.96738987 | 50.50071646 |
| 20.70720686 | 80.29010314 | 50.498655   |
| 2.3892931   | 98.37743407 | 50.38336358 |
| 24.29114651 | 76.31971343 | 50.30542997 |
| 12.34468102 | 88.23088257 | 50.28778179 |
| 75.66094816 | 24.70464712 | 50.18279764 |
| 11.15003447 | 89.1131914  | 50.13161293 |
| 51.36980164 | 48.52698542 | 49.94839353 |
| 1.592862067 | 97.93627966 | 49.76457086 |
| 43.40549131 | 56.02661043 | 49.71605087 |
| 57.74124991 | 41.46851481 | 49.60488236 |
| 30.66259478 | 68.37893399 | 49.52076439 |
| 23.09649996 | 75.4374046  | 49.26695228 |
| 19.91077583 | 78.52548549 | 49.21813066 |
| 10.35360343 | 87.78972816 | 49.0716658  |
| 64.51091369 | 33.52773538 | 49.01932454 |
| 46.19299993 | 51.61506631 | 48.90403312 |
| 27.87508616 | 69.70239723 | 48.7887417  |
| 32.25545685 | 65.2908531  | 48.77315498 |
| 74.86451713 | 22.49887506 | 48.68169609 |
| 45.3965689  | 51.17391189 | 48.28524039 |
| 60.13054301 | 36.17466186 | 48.15260243 |
| 19.51256031 | 76.76086784 | 48.13671408 |

|             |             |             |
|-------------|-------------|-------------|
| 24.29114651 | 71.9081693  | 48.09965791 |
| 2.3892931   | 93.52473553 | 47.95701431 |
| 32.65367236 | 63.08508104 | 47.8693767  |
| 62.12162059 | 33.08658097 | 47.60410078 |
| 46.98943096 | 48.085831   | 47.53763098 |
| 31.0608103  | 63.96738987 | 47.51410008 |
| 37.03404305 | 56.90891926 | 46.97148115 |
| 70.88236196 | 22.49887506 | 46.69061851 |
| 53.75909474 | 39.26274275 | 46.51091874 |
| 51.76801716 | 41.0273604  | 46.39768878 |
| 35.8393965  | 56.90891926 | 46.37415788 |
| 19.91077583 | 72.79047812 | 46.35062698 |
| 14.73397412 | 77.64317666 | 46.18857539 |
| 6.769663783 | 85.5839561  | 46.17680994 |
| 27.87508616 | 64.40854428 | 46.14181522 |
| 48.58229303 | 43.67428687 | 46.12828995 |
| 43.0072758  | 48.085831   | 45.5465534  |
| 43.40549131 | 47.64467659 | 45.52508395 |
| 56.14838784 | 34.85119862 | 45.49979323 |
| 11.15003447 | 79.40779432 | 45.27891439 |
| 35.8393965  | 54.7031472  | 45.27127185 |
| 38.2286896  | 52.05622072 | 45.14245516 |
| 55.75017233 | 34.4100442  | 45.08010827 |
| 48.58229303 | 41.46851481 | 45.02540392 |
| 40.6179827  | 49.40929424 | 45.01363847 |
| 33.05188788 | 56.90891926 | 44.98040357 |
| 63.31626714 | 26.46926477 | 44.89276596 |
| 58.13946543 | 30.43965449 | 44.28955996 |
| 50.57337061 | 37.93927951 | 44.25632506 |
| 7.964310333 | 80.29010314 | 44.12720674 |
| 43.80370683 | 44.11544129 | 43.95957406 |
| 64.11269818 | 23.38118388 | 43.74694103 |
| 41.41441373 | 45.88005894 | 43.64723633 |
| 47.785862   | 39.26274275 | 43.52430237 |
| 24.68936203 | 62.20277221 | 43.44606712 |
| 43.40549131 | 43.23313246 | 43.31931189 |
| 42.60906028 | 43.67428687 | 43.14167358 |
| 56.54660336 | 29.55734566 | 43.05197451 |
| 45.79478441 | 40.14505157 | 42.96991799 |
| 13.53932757 | 72.34932371 | 42.94432564 |
| 54.95374129 | 30.8808089  | 42.9172751  |
| 8.362525849 | 77.20202225 | 42.78227405 |
| 36.23761201 | 48.96813983 | 42.60287592 |
| 3.58393965  | 81.17241197 | 42.37817581 |
| 32.25545685 | 52.49737513 | 42.37641599 |

|             |             |             |
|-------------|-------------|-------------|
| 50.97158613 | 33.52773538 | 42.24966075 |
| 26.68043961 | 57.79122809 | 42.23583385 |
| 27.47687065 | 56.90891926 | 42.19289495 |
| 7.167879299 | 77.20202225 | 42.18495078 |
| 31.85724133 | 52.49737513 | 42.17730823 |
| 50.17515509 | 33.96888979 | 42.07202244 |
| 43.80370683 | 40.14505157 | 41.9743792  |
| 33.05188788 | 50.73275748 | 41.89232268 |
| 26.2822241  | 57.35007367 | 41.81614889 |
| 19.1143448  | 63.96738987 | 41.54086733 |
| 7.964310333 | 74.99625019 | 41.48028026 |
| 62.12162059 | 20.7342574  | 41.427939   |
| 71.28057748 | 11.47001473 | 41.37529611 |
| 51.36980164 | 31.32196331 | 41.34588248 |
| 21.5036379  | 60.43815456 | 40.97089623 |
| 1.991077583 | 79.84894873 | 40.92001316 |
| 2.3892931   | 78.9666399  | 40.6779665  |
| 24.29114651 | 56.90891926 | 40.60003289 |
| 46.19299993 | 34.85119862 | 40.52209927 |
| 17.91969825 | 62.64392663 | 40.28181244 |
| 58.93589646 | 21.61656623 | 40.27623135 |
| 11.9464655  | 68.37893399 | 40.16269975 |
| 3.58393965  | 76.31971343 | 39.95182654 |
| 37.03404305 | 42.79197805 | 39.91301055 |
| 33.4501034  | 46.32121335 | 39.88565837 |
| 62.51983611 | 16.76386769 | 39.6418519  |
| 18.71612928 | 60.43815456 | 39.57714192 |
| 43.40549131 | 35.73350744 | 39.56949938 |
| 44.99835338 | 33.96888979 | 39.48362158 |
| 4.7785862   | 74.11394136 | 39.44626378 |
| 17.12326721 | 61.7616178  | 39.44244251 |
| 15.92862067 | 62.64392663 | 39.28627365 |
| 41.81262925 | 36.61581627 | 39.21422276 |
| 16.7250517  | 61.32046339 | 39.02275754 |
| 62.12162059 | 15.88155886 | 39.00158973 |
| 30.26437926 | 47.64467659 | 38.95452793 |
| 15.13218963 | 62.64392663 | 38.88805813 |
| 37.43225856 | 40.14505157 | 38.78865507 |
| 1.592862067 | 75.87855901 | 38.73571054 |
| 24.29114651 | 52.93852954 | 38.61483803 |
| 32.65367236 | 44.5565957  | 38.60513403 |
| 25.48579306 | 51.61506631 | 38.55042968 |
| 10.35360343 | 66.61431634 | 38.48395989 |
| 47.38764648 | 29.55734566 | 38.47249607 |
| 23.09649996 | 53.37968396 | 38.23809196 |

|             |             |             |
|-------------|-------------|-------------|
| 60.13054301 | 16.32271328 | 38.22662814 |
| 46.19299993 | 29.99850007 | 38.09575    |
| 54.95374129 | 20.7342574  | 37.84399935 |
| 26.68043961 | 48.96813983 | 37.82428972 |
| 10.35360343 | 65.2908531  | 37.82222827 |
| 29.46794823 | 45.88005894 | 37.67400358 |
| 53.36087923 | 21.61656623 | 37.48872273 |
| 49.37872406 | 25.58695595 | 37.48284    |
| 57.34303439 | 17.2050221  | 37.27402825 |
| 5.176801716 | 69.26124282 | 37.21902227 |
| 26.2822241  | 48.085831   | 37.18402755 |
| 15.53040515 | 58.67353691 | 37.10197103 |
| 16.32683618 | 57.79122809 | 37.05903213 |
| 66.50199128 | 7.499625019 | 37.00080815 |
| 27.47687065 | 46.32121335 | 36.899042   |
| 15.53040515 | 58.2323825  | 36.88139382 |
| 16.7250517  | 56.90891926 | 36.81698548 |
| 57.74124991 | 15.88155886 | 36.81140439 |
| 1.19464655  | 72.34932371 | 36.77198513 |
| 22.69828445 | 50.29160307 | 36.49494376 |
| 10.75181895 | 62.20277221 | 36.47729558 |
| 15.13218963 | 57.79122809 | 36.46170886 |
| 72.47522403 | 0.441154413 | 36.45818922 |
| 44.20192235 | 28.67503684 | 36.43847959 |
| 7.566094816 | 65.2908531  | 36.42847396 |
| 16.32683618 | 56.46776485 | 36.39730051 |
| 29.86616375 | 42.79197805 | 36.3290709  |
| 22.30006893 | 50.29160307 | 36.295836   |
| 23.09649996 | 49.40929424 | 36.2528971  |
| 34.24653443 | 37.93927951 | 36.09290697 |
| 8.760741366 | 62.64392663 | 35.702334   |
| 21.10542238 | 50.29160307 | 35.69851272 |
| 63.71448266 | 7.499625019 | 35.60705384 |
| 31.85724133 | 39.26274275 | 35.55999204 |
| 57.34303439 | 13.6757868  | 35.5094106  |
| 46.59121545 | 24.26349271 | 35.42735408 |
| 26.68043961 | 44.11544129 | 35.39794045 |
| 36.63582753 | 33.96888979 | 35.30235866 |
| 25.88400858 | 44.11544129 | 34.99972493 |
| 19.91077583 | 49.85044865 | 34.88061224 |
| 32.65367236 | 37.05697068 | 34.85532152 |
| 45.79478441 | 23.82233829 | 34.80856135 |
| 13.14111205 | 56.46776485 | 34.80443845 |
| 31.0608103  | 38.38043392 | 34.72062211 |
| 43.40549131 | 26.02811036 | 34.71680084 |

|             |             |             |
|-------------|-------------|-------------|
| 2.787508616 | 66.61431634 | 34.70091248 |
| 40.6179827  | 28.67503684 | 34.64650977 |
| 50.97158613 | 18.08733093 | 34.52945853 |
| 27.07865513 | 41.90966922 | 34.49416218 |
| 57.74124991 | 10.58770591 | 34.16447791 |
| 26.68043961 | 41.46851481 | 34.07447721 |
| 63.71448266 | 4.411544129 | 34.06301339 |
| 39.42333615 | 28.23388242 | 33.82860928 |
| 1.19464655  | 66.17316193 | 33.68390424 |
| 1.991077583 | 65.2908531  | 33.64096534 |
| 21.10542238 | 45.43890453 | 33.27216345 |
| 14.73397412 | 51.61506631 | 33.17452021 |
| 41.41441373 | 24.70464712 | 33.05953042 |
| 22.30006893 | 43.67428687 | 32.9871779  |
| 5.973232749 | 59.99700015 | 32.98511645 |
| 51.36980164 | 14.55809562 | 32.96394863 |
| 41.01619821 | 24.70464712 | 32.86042267 |
| 25.88400858 | 39.70389716 | 32.79395287 |
| 60.92697404 | 4.411544129 | 32.66925909 |
| 49.77693958 | 15.44040445 | 32.60867201 |
| 18.31791376 | 46.76236776 | 32.54014076 |
| 6.371448266 | 58.67353691 | 32.52249259 |
| 52.16623268 | 12.79347797 | 32.47985533 |
| 35.8393965  | 29.11619125 | 32.47779387 |
| 31.85724133 | 33.08658097 | 32.47191115 |
| 17.52148273 | 47.20352218 | 32.36250245 |
| 7.964310333 | 56.46776485 | 32.21603759 |
| 53.36087923 | 11.02886032 | 32.19486977 |
| 29.06973271 | 35.29235303 | 32.18104287 |
| 23.892931   | 40.14505157 | 32.01899128 |
| 1.991077583 | 61.7616178  | 31.87634769 |
| 51.36980164 | 12.35232356 | 31.8610626  |
| 7.167879299 | 56.46776485 | 31.81782207 |
| 50.17515509 | 13.23463239 | 31.70489374 |
| 34.64474995 | 28.67503684 | 31.65989339 |
| 46.98943096 | 16.32271328 | 31.65607212 |
| 43.0072758  | 20.29310299 | 31.65018939 |
| 31.0608103  | 32.20427214 | 31.63254122 |
| 56.14838784 | 6.617316193 | 31.38285202 |
| 10.35360343 | 51.61506631 | 30.98433487 |
| 22.69828445 | 39.26274275 | 30.9805136  |
| 56.94481888 | 4.852698542 | 30.89875871 |
| 37.83047408 | 23.82233829 | 30.82640619 |
| 40.6179827  | 20.7342574  | 30.67612005 |
| 38.2286896  | 22.94002947 | 30.58435953 |



|             |             |             |
|-------------|-------------|-------------|
| 30.66259478 | 30.43965449 | 30.55112463 |
| 23.09649996 | 37.93927951 | 30.51788974 |
| 52.96266371 | 7.940779432 | 30.45172157 |
| 39.42333615 | 21.17541182 | 30.29937398 |
| 3.185724133 | 57.35007367 | 30.2678989  |
| 5.973232749 | 54.26199278 | 30.11761277 |
| 11.15003447 | 48.52698542 | 29.83850994 |
| 16.7250517  | 42.79197805 | 29.75851487 |
| 26.2822241  | 33.08658097 | 29.68440253 |
| 18.31791376 | 41.0273604  | 29.67263708 |
| 6.769663783 | 52.49737513 | 29.63351946 |
| 19.91077583 | 39.26274275 | 29.58675929 |
| 31.85724133 | 26.91041918 | 29.38383026 |
| 10.35360343 | 48.085831   | 29.21971722 |
| 0.398215517 | 57.79122809 | 29.0947218  |
| 13.14111205 | 44.5565957  | 28.84885387 |
| 18.71612928 | 38.82158833 | 28.76885881 |
| 28.27330168 | 29.11619125 | 28.69474646 |
| 29.06973271 | 28.23388242 | 28.65180757 |
| 9.158956882 | 48.085831   | 28.62239394 |
| 40.6179827  | 16.32271328 | 28.47034799 |
| 33.4501034  | 22.94002947 | 28.19506643 |
| 14.3357586  | 41.90966922 | 28.12271391 |
| 9.557172399 | 46.32121335 | 27.93919288 |
| 18.71612928 | 36.61581627 | 27.66597277 |
| 8.362525849 | 46.76236776 | 27.56244681 |
| 8.760741366 | 46.32121335 | 27.54097736 |
| 33.4501034  | 21.61656623 | 27.53333481 |
| 12.34468102 | 42.35082364 | 27.34775233 |
| 21.10542238 | 33.52773538 | 27.31657888 |
| 5.176801716 | 49.40929424 | 27.29304798 |
| 25.88400858 | 28.67503684 | 27.27952271 |
| 22.30006893 | 32.20427214 | 27.25217054 |
| 23.49471548 | 30.43965449 | 26.96718498 |
| 19.51256031 | 33.96888979 | 26.74072505 |
| 27.87508616 | 25.58695595 | 26.73102106 |
| 15.92862067 | 37.49812509 | 26.71337288 |
| 16.7250517  | 36.61581627 | 26.67043398 |
| 19.91077583 | 33.08658097 | 26.4986784  |
| 16.32683618 | 36.61581627 | 26.47132622 |
| 25.88400858 | 26.91041918 | 26.39721388 |
| 2.3892931   | 50.29160307 | 26.34044808 |
| 31.0608103  | 21.61656623 | 26.33868826 |
| 15.92862067 | 36.61581627 | 26.27221847 |
| 29.46794823 | 22.94002947 | 26.20398885 |

|             |             |             |
|-------------|-------------|-------------|
| 33.84831891 | 18.52848534 | 26.18840213 |
| 17.52148273 | 34.85119862 | 26.18634067 |
| 50.97158613 | 1.323463239 | 26.14752468 |
| 5.973232749 | 46.32121335 | 26.14722305 |
| 15.53040515 | 36.61581627 | 26.07311071 |
| 13.53932757 | 38.38043392 | 25.95988074 |
| 7.566094816 | 44.11544129 | 25.84076805 |
| 13.93754308 | 37.49812509 | 25.71783409 |
| 19.91077583 | 31.32196331 | 25.61636957 |
| 16.7250517  | 33.96888979 | 25.34697074 |
| 11.9464655  | 38.38043392 | 25.16344971 |
| 41.41441373 | 8.823088257 | 25.11875099 |
| 1.19464655  | 48.96813983 | 25.08139319 |
| 3.185724133 | 46.76236776 | 24.97404595 |
| 36.23761201 | 13.6757868  | 24.95669941 |
| 28.27330168 | 21.61656623 | 24.94493396 |
| 12.34468102 | 37.49812509 | 24.92140305 |
| 9.557172399 | 40.14505157 | 24.85111198 |
| 11.15003447 | 38.38043392 | 24.76523419 |
| 3.185724133 | 46.32121335 | 24.75346874 |
| 33.05188788 | 16.32271328 | 24.68730058 |
| 17.12326721 | 32.20427214 | 24.66376968 |
| 41.81262925 | 7.499625019 | 24.65612713 |
| 10.75181895 | 37.93927951 | 24.34554923 |
| 19.1143448  | 29.55734566 | 24.33584523 |
| 15.13218963 | 33.52773538 | 24.3299625  |
| 20.30899135 | 28.23388242 | 24.27143689 |
| 20.70720686 | 27.79272801 | 24.24996744 |
| 17.12326721 | 31.32196331 | 24.22261526 |
| 13.14111205 | 35.29235303 | 24.21673254 |
| 2.787508616 | 45.43890453 | 24.11320657 |
| 7.167879299 | 41.0273604  | 24.09761985 |
| 19.51256031 | 28.67503684 | 24.09379858 |
| 19.91077583 | 28.23388242 | 24.07232913 |
| 28.27330168 | 19.85194858 | 24.06262513 |
| 11.9464655  | 36.17466186 | 24.06056368 |
| 3.982155166 | 44.11544129 | 24.04879823 |
| 9.557172399 | 38.38043392 | 23.96880316 |
| 9.955387916 | 37.93927951 | 23.94733371 |
| 13.14111205 | 34.4100442  | 23.77557813 |
| 5.176801716 | 42.35082364 | 23.76381268 |
| 29.86616375 | 17.64617651 | 23.75617013 |
| 10.35360343 | 37.05697068 | 23.70528706 |
| 16.32683618 | 30.8808089  | 23.60382254 |
| 17.52148273 | 29.55734566 | 23.5394142  |

|             |             |             |
|-------------|-------------|-------------|
| 14.3357586  | 32.64542655 | 23.49059258 |
| 11.54824998 | 35.29235303 | 23.42030151 |
| 1.991077583 | 44.5565957  | 23.27383664 |
| 28.6715172  | 17.64617651 | 23.15884686 |
| 9.557172399 | 36.61581627 | 23.08649433 |
| 31.0608103  | 14.99925004 | 23.03003017 |
| 12.34468102 | 33.52773538 | 22.9362082  |
| 0.796431033 | 44.99775011 | 22.89709057 |
| 23.09649996 | 22.49887506 | 22.79768751 |
| 23.09649996 | 22.49887506 | 22.79768751 |
| 23.09649996 | 22.49887506 | 22.79768751 |
| 19.51256031 | 26.02811036 | 22.77033534 |
| 25.88400858 | 19.41079417 | 22.64740137 |
| 9.557172399 | 35.73350744 | 22.64533992 |
| 9.955387916 | 35.29235303 | 22.62387047 |
| 15.92862067 | 29.11619125 | 22.52240596 |
| 25.08757755 | 19.85194858 | 22.46976306 |
| 17.12326721 | 27.79272801 | 22.45799761 |
| 25.48579306 | 19.41079417 | 22.44829362 |
| 27.47687065 | 17.2050221  | 22.34094637 |
| 37.03404305 | 7.499625019 | 22.26683403 |
| 0.398215517 | 44.11544129 | 22.2568284  |
| 15.92862067 | 28.23388242 | 22.08125154 |
| 38.2286896  | 5.735007367 | 21.98184848 |
| 9.158956882 | 34.4100442  | 21.78450054 |
| 25.88400858 | 17.64617651 | 21.76509255 |
| 13.93754308 | 29.55734566 | 21.74744437 |
| 26.68043961 | 16.76386769 | 21.72215365 |
| 15.53040515 | 27.79272801 | 21.66156658 |
| 7.964310333 | 34.85119862 | 21.40775447 |
| 9.158956882 | 33.52773538 | 21.34334613 |
| 2.3892931   | 40.14505157 | 21.26717234 |
| 15.13218963 | 27.3515736  | 21.24188161 |
| 10.35360343 | 31.76311773 | 21.05836058 |
| 16.7250517  | 25.14580153 | 20.93542662 |
| 9.158956882 | 32.64542655 | 20.90219172 |
| 20.30899135 | 21.17541182 | 20.74220158 |
| 3.982155166 | 37.49812509 | 20.74014013 |
| 27.07865513 | 14.11694121 | 20.59779817 |
| 7.964310333 | 33.08658097 | 20.52544565 |
| 13.14111205 | 27.79272801 | 20.46692003 |
| 38.2286896  | 2.646926477 | 20.43780804 |
| 11.15003447 | 29.55734566 | 20.35369006 |
| 28.27330168 | 12.35232356 | 20.31281262 |
| 24.68936203 | 15.88155886 | 20.28546045 |

|             |             |             |
|-------------|-------------|-------------|
| 37.03404305 | 3.529235303 | 20.28163917 |
| 17.52148273 | 22.94002947 | 20.2307561  |
| 1.19464655  | 39.26274275 | 20.22869465 |
| 23.49471548 | 16.76386769 | 20.12929158 |
| 20.30899135 | 19.85194858 | 20.08046996 |
| 9.158956882 | 30.8808089  | 20.01988289 |
| 5.176801716 | 34.85119862 | 20.01400017 |
| 17.52148273 | 22.49887506 | 20.01017889 |
| 1.991077583 | 37.93927951 | 19.96517854 |
| 35.44118098 | 4.411544129 | 19.92636255 |
| 36.23761201 | 3.529235303 | 19.88342366 |
| 7.964310333 | 31.76311773 | 19.86371403 |
| 1.592862067 | 37.93927951 | 19.76607079 |
| 18.31791376 | 21.17541182 | 19.74666279 |
| 13.93754308 | 25.14580153 | 19.54167231 |
| 10.35360343 | 28.67503684 | 19.51432013 |
| 31.0608103  | 7.940779432 | 19.50079486 |
| 23.09649996 | 15.88155886 | 19.48902941 |
| 3.185724133 | 35.73350744 | 19.45961579 |
| 18.31791376 | 20.29310299 | 19.30550838 |
| 15.92862067 | 22.49887506 | 19.21374786 |
| 24.29114651 | 14.11694121 | 19.20404386 |
| 17.91969825 | 20.29310299 | 19.10640062 |
| 17.91969825 | 19.85194858 | 18.88582341 |
| 26.68043961 | 11.02886032 | 18.85464997 |
| 27.87508616 | 9.705397083 | 18.79024162 |
| 1.19464655  | 36.17466186 | 18.6846542  |
| 13.53932757 | 23.82233829 | 18.68083293 |
| 14.73397412 | 22.49887506 | 18.61642459 |
| 15.13218963 | 22.05772064 | 18.59495514 |
| 7.167879299 | 29.99850007 | 18.58318969 |
| 11.54824998 | 25.58695595 | 18.56760296 |
| 11.54824998 | 25.58695595 | 18.56760296 |
| 34.64474995 | 2.205772064 | 18.42526101 |
| 18.31791376 | 18.52848534 | 18.42319955 |
| 6.371448266 | 30.43965449 | 18.40555138 |
| 25.88400858 | 10.58770591 | 18.23585724 |
| 15.13218963 | 21.17541182 | 18.15380072 |
| 16.32683618 | 19.85194858 | 18.08939238 |
| 18.31791376 | 17.64617651 | 17.98204514 |
| 3.58393965  | 32.20427214 | 17.89410589 |
| 7.167879299 | 28.23388242 | 17.70088086 |
| 7.167879299 | 28.23388242 | 17.70088086 |
| 11.9464655  | 23.38118388 | 17.66382469 |
| 11.9464655  | 23.38118388 | 17.66382469 |

|             |             |             |
|-------------|-------------|-------------|
| 10.35360343 | 24.70464712 | 17.52912528 |
| 14.73397412 | 20.29310299 | 17.51353855 |
| 12.74289653 | 22.05772064 | 17.40030859 |
| 8.760741366 | 26.02811036 | 17.39442586 |
| 9.158956882 | 25.58695595 | 17.37295641 |
| 5.575017233 | 29.11619125 | 17.34560424 |
| 9.955387916 | 24.70464712 | 17.33001752 |
| 14.3357586  | 20.29310299 | 17.3144308  |
| 5.176801716 | 29.11619125 | 17.14649648 |
| 9.557172399 | 24.70464712 | 17.13090976 |
| 11.9464655  | 22.05772064 | 17.00209307 |
| 20.70720686 | 13.23463239 | 16.97091963 |
| 13.53932757 | 20.29310299 | 16.91621528 |
| 17.12326721 | 16.32271328 | 16.72299025 |
| 9.158956882 | 24.26349271 | 16.7112248  |
| 30.26437926 | 3.08808089  | 16.67623008 |
| 11.15003447 | 22.05772064 | 16.60387755 |
| 8.362525849 | 24.70464712 | 16.53358648 |
| 29.46794823 | 3.529235303 | 16.49859177 |
| 9.158956882 | 23.82233829 | 16.49064759 |
| 8.760741366 | 23.82233829 | 16.29153983 |
| 9.158956882 | 23.38118388 | 16.27007038 |
| 21.5036379  | 11.02886032 | 16.26624911 |
| 1.19464655  | 31.32196331 | 16.25830493 |
| 2.3892931   | 29.99850007 | 16.19389659 |
| 10.75181895 | 21.61656623 | 16.18419259 |
| 2.787508616 | 29.55734566 | 16.17242714 |
| 12.74289653 | 19.41079417 | 16.07684535 |
| 12.74289653 | 19.41079417 | 16.07684535 |
| 14.3357586  | 17.64617651 | 15.99096756 |
| 10.75181895 | 21.17541182 | 15.96361538 |
| 9.557172399 | 22.05772064 | 15.80744652 |
| 1.991077583 | 29.55734566 | 15.77421162 |
| 18.71612928 | 12.79347797 | 15.75480363 |
| 11.15003447 | 20.29310299 | 15.72156873 |
| 4.7785862   | 26.46926477 | 15.62392549 |
| 17.12326721 | 14.11694121 | 15.62010421 |
| 17.12326721 | 14.11694121 | 15.62010421 |
| 13.53932757 | 17.64617651 | 15.59275204 |
| 2.3892931   | 28.67503684 | 15.53216497 |
| 4.380370683 | 26.46926477 | 15.42481773 |
| 12.74289653 | 18.08733093 | 15.41511373 |
| 5.176801716 | 25.58695595 | 15.38187883 |
| 18.31791376 | 12.35232356 | 15.33511866 |
| 14.73397412 | 15.88155886 | 15.30776649 |

|             |             |             |
|-------------|-------------|-------------|
| 2.787508616 | 27.79272801 | 15.29011831 |
| 12.34468102 | 18.08733093 | 15.21600597 |
| 8.362525849 | 21.61656623 | 14.98954604 |
| 17.52148273 | 12.35232356 | 14.93690315 |
| 14.3357586  | 15.44040445 | 14.88808152 |
| 6.371448266 | 23.38118388 | 14.87631607 |
| 20.70720686 | 8.823088257 | 14.76514756 |
| 4.380370683 | 25.14580153 | 14.76308611 |
| 2.3892931   | 26.91041918 | 14.64985614 |
| 15.92862067 | 13.23463239 | 14.58162653 |
| 21.90185341 | 7.058470606 | 14.48016201 |
| 18.71612928 | 10.1465515  | 14.43134039 |
| 20.70720686 | 7.940779432 | 14.32399315 |
| 9.158956882 | 19.41079417 | 14.28487552 |
| 5.973232749 | 22.49887506 | 14.2360539  |
| 7.566094816 | 20.7342574  | 14.15017611 |
| 3.58393965  | 24.70464712 | 14.14429339 |
| 8.760741366 | 19.41079417 | 14.08576777 |
| 5.575017233 | 22.49887506 | 14.03694614 |
| 1.592862067 | 26.46926477 | 14.03106342 |
| 13.93754308 | 14.11694121 | 14.02724215 |
| 1.991077583 | 25.58695595 | 13.78901676 |
| 8.362525849 | 18.96963975 | 13.6660828  |
| 5.176801716 | 22.05772064 | 13.61726118 |
| 10.35360343 | 16.76386769 | 13.55873556 |
| 10.35360343 | 16.76386769 | 13.55873556 |
| 10.35360343 | 16.76386769 | 13.55873556 |
| 11.54824998 | 15.44040445 | 13.49432722 |
| 7.566094816 | 19.41079417 | 13.48844449 |
| 1.19464655  | 25.58695595 | 13.39080125 |
| 13.93754308 | 12.79347797 | 13.36551053 |
| 5.973232749 | 20.7342574  | 13.35374508 |
| 22.69828445 | 3.970389716 | 13.33433708 |
| 2.787508616 | 23.82233829 | 13.30492346 |
| 3.982155166 | 22.49887506 | 13.24051511 |
| 5.176801716 | 21.17541182 | 13.17610677 |
| 21.90185341 | 4.411544129 | 13.15669877 |
| 5.575017233 | 20.7342574  | 13.15463732 |
| 10.35360343 | 15.88155886 | 13.11758115 |
| 11.54824998 | 14.55809562 | 13.0531728  |
| 8.362525849 | 17.64617651 | 13.00435118 |
| 4.380370683 | 21.61656623 | 12.99846846 |
| 13.53932757 | 12.35232356 | 12.94582556 |
| 6.371448266 | 19.41079417 | 12.89112122 |
| 23.09649996 | 2.646926477 | 12.87171322 |

|             |             |             |
|-------------|-------------|-------------|
| 3.58393965  | 22.05772064 | 12.82083015 |
| 20.70720686 | 4.852698542 | 12.7799527  |
| 4.380370683 | 21.17541182 | 12.77789125 |
| 23.49471548 | 1.764617651 | 12.62966657 |
| 7.566094816 | 17.64617651 | 12.60613567 |
| 8.760741366 | 16.32271328 | 12.54172732 |
| 21.5036379  | 3.529235303 | 12.5164366  |
| 1.19464655  | 23.82233829 | 12.50849242 |
| 9.557172399 | 15.44040445 | 12.49878842 |
| 5.973232749 | 18.96963975 | 12.47143625 |
| 6.371448266 | 18.52848534 | 12.4499668  |
| 11.15003447 | 13.6757868  | 12.41291063 |
| 7.167879299 | 17.64617651 | 12.40702791 |
| 7.566094816 | 17.2050221  | 12.38555846 |
| 3.58393965  | 21.17541182 | 12.37967573 |
| 9.158956882 | 15.44040445 | 12.29968067 |
| 15.13218963 | 9.26424267  | 12.19821615 |
| 12.34468102 | 11.91116915 | 12.12792508 |
| 0.398215517 | 23.82233829 | 12.11027691 |
| 12.74289653 | 11.47001473 | 12.10645563 |
| 1.19464655  | 22.94002947 | 12.06733801 |
| 9.557172399 | 14.55809562 | 12.05763401 |
| 11.15003447 | 12.35232356 | 11.75117901 |
| 19.91077583 | 3.529235303 | 11.72000557 |
| 4.7785862   | 18.52848534 | 11.65353577 |
| 5.176801716 | 18.08733093 | 11.63206632 |
| 13.53932757 | 9.705397083 | 11.62236232 |
| 8.362525849 | 14.55809562 | 11.46031074 |
| 8.362525849 | 14.55809562 | 11.46031074 |
| 8.760741366 | 14.11694121 | 11.43884129 |
| 5.176801716 | 17.64617651 | 11.41148912 |
| 1.19464655  | 21.61656623 | 11.40560639 |
| 5.973232749 | 16.76386769 | 11.36855022 |
| 14.3357586  | 8.381933844 | 11.35884622 |
| 3.982155166 | 18.52848534 | 11.25532025 |
| 6.371448266 | 15.88155886 | 11.12650356 |
| 2.3892931   | 19.85194858 | 11.12062084 |
| 7.566094816 | 14.55809562 | 11.06209522 |
| 20.70720686 | 1.323463239 | 11.01533505 |
| 8.760741366 | 13.23463239 | 10.99768688 |
| 14.73397412 | 7.058470606 | 10.89622236 |
| 15.13218963 | 6.617316193 | 10.87475291 |
| 7.964310333 | 13.6757868  | 10.82004857 |
| 13.14111205 | 8.381933844 | 10.76152295 |
| 13.14111205 | 8.381933844 | 10.76152295 |

|             |             |             |
|-------------|-------------|-------------|
| 5.176801716 | 16.32271328 | 10.7497575  |
| 5.973232749 | 15.44040445 | 10.7068186  |
| 6.371448266 | 14.99925004 | 10.68534915 |
| 11.54824998 | 9.705397083 | 10.62682353 |
| 3.58393965  | 17.64617651 | 10.61505808 |
| 4.7785862   | 16.32271328 | 10.55064974 |
| 10.75181895 | 10.1465515  | 10.44918522 |
| 3.185724133 | 17.64617651 | 10.41595032 |
| 7.964310333 | 12.79347797 | 10.37889415 |
| 8.362525849 | 12.35232356 | 10.3574247  |
| 13.14111205 | 7.499625019 | 10.32036853 |
| 1.991077583 | 18.52848534 | 10.25978146 |
| 14.73397412 | 5.735007367 | 10.23449074 |
| 14.73397412 | 5.735007367 | 10.23449074 |
| 7.566094816 | 12.79347797 | 10.17978639 |
| 16.32683618 | 3.970389716 | 10.14861295 |
| 1.592862067 | 18.52848534 | 10.0606737  |
| 5.973232749 | 14.11694121 | 10.04508698 |
| 1.19464655  | 18.52848534 | 9.861565945 |
| 5.973232749 | 13.6757868  | 9.824509774 |
| 6.769663783 | 12.79347797 | 9.781570878 |
| 7.167879299 | 12.35232356 | 9.76010143  |
| 3.58393965  | 15.88155886 | 9.732749256 |
| 10.75181895 | 8.381933844 | 9.566876397 |
| 11.54824998 | 7.499625019 | 9.5239375   |
| 12.74289653 | 6.17616178  | 9.459529156 |
| 10.75181895 | 7.940779432 | 9.34629919  |
| 3.58393965  | 14.99925004 | 9.291594844 |
| 8.760741366 | 9.705397083 | 9.233069224 |
| 4.7785862   | 13.6757868  | 9.227186499 |
| 4.7785862   | 13.6757868  | 9.227186499 |
| 5.575017233 | 12.79347797 | 9.184247603 |
| 6.371448266 | 11.91116915 | 9.141308707 |
| 6.769663783 | 11.47001473 | 9.119839259 |
| 16.32683618 | 1.764617651 | 9.045726917 |
| 8.362525849 | 9.705397083 | 9.033961466 |
| 1.592862067 | 16.32271328 | 8.957787671 |
| 6.371448266 | 11.47001473 | 8.9207315   |
| 2.3892931   | 15.44040445 | 8.914848775 |
| 2.3892931   | 15.44040445 | 8.914848775 |
| 6.769663783 | 11.02886032 | 8.899262052 |
| 4.380370683 | 13.23463239 | 8.807501534 |
| 1.19464655  | 16.32271328 | 8.758679913 |
| 13.93754308 | 3.529235303 | 8.733389192 |
| 9.955387916 | 7.499625019 | 8.727506467 |



|             |             |             |
|-------------|-------------|-------------|
| 6.769663783 | 10.58770591 | 8.678684846 |
| 2.787508616 | 14.55809562 | 8.672802121 |
| 7.167879299 | 10.1465515  | 8.657215398 |
| 7.566094816 | 9.705397083 | 8.635745949 |
| 3.58393965  | 13.6757868  | 8.629863224 |
| 15.92862067 | 1.323463239 | 8.626041952 |
| 11.9464655  | 5.293852954 | 8.620159227 |
| 3.982155166 | 13.23463239 | 8.608393776 |
| 4.380370683 | 12.79347797 | 8.586924328 |
| 4.380370683 | 12.79347797 | 8.586924328 |
| 7.964310333 | 8.823088257 | 8.393699295 |
| 3.982155166 | 12.79347797 | 8.38781657  |
| 1.19464655  | 15.44040445 | 8.3175255   |
| 5.973232749 | 10.58770591 | 8.280469329 |
| 3.982155166 | 12.35232356 | 8.167239363 |
| 9.158956882 | 7.058470606 | 8.108713744 |
| 5.575017233 | 10.58770591 | 8.081361571 |
| 1.991077583 | 14.11694121 | 8.054009397 |
| 6.371448266 | 9.705397083 | 8.038422675 |
| 7.167879299 | 8.823088257 | 7.995483778 |
| 4.380370683 | 11.47001473 | 7.925192709 |
| 8.760741366 | 7.058470606 | 7.909605986 |
| 5.575017233 | 10.1465515  | 7.860784364 |
| 10.35360343 | 5.293852954 | 7.823728193 |
| 6.769663783 | 8.823088257 | 7.79637602  |
| 7.167879299 | 8.381933844 | 7.774906572 |
| 4.7785862   | 10.58770591 | 7.683146054 |
| 1.592862067 | 13.6757868  | 7.634324433 |
| 5.973232749 | 9.26424267  | 7.61873771  |
| 6.769663783 | 8.381933844 | 7.575798814 |
| 7.566094816 | 7.499625019 | 7.532859917 |
| 4.380370683 | 10.58770591 | 7.484038296 |
| 4.380370683 | 10.58770591 | 7.484038296 |
| 8.760741366 | 6.17616178  | 7.468451573 |
| 4.7785862   | 10.1465515  | 7.462568848 |
| 4.7785862   | 10.1465515  | 7.462568848 |
| 9.158956882 | 5.735007367 | 7.446982125 |
| 5.575017233 | 9.26424267  | 7.419629951 |
| 3.58393965  | 11.02886032 | 7.306399986 |
| 11.9464655  | 2.646926477 | 7.296695988 |
| 4.380370683 | 10.1465515  | 7.263461089 |
| 8.760741366 | 5.735007367 | 7.247874367 |
| 1.991077583 | 12.35232356 | 7.171700572 |
| 6.769663783 | 7.499625019 | 7.134644401 |
| 8.362525849 | 5.735007367 | 7.048766608 |

|             |             |             |
|-------------|-------------|-------------|
| 4.380370683 | 9.705397083 | 7.042883883 |
| 8.760741366 | 5.293852954 | 7.02729716  |
| 1.19464655  | 12.79347797 | 6.994062262 |
| 1.19464655  | 12.79347797 | 6.994062262 |
| 5.973232749 | 7.940779432 | 6.957006091 |
| 1.991077583 | 11.91116915 | 6.951123365 |
| 6.371448266 | 7.499625019 | 6.935536642 |
| 3.982155166 | 9.705397083 | 6.843776125 |
| 8.760741366 | 4.852698542 | 6.806719954 |
| 8.760741366 | 4.852698542 | 6.806719954 |
| 4.7785862   | 8.823088257 | 6.800837228 |
| 1.19464655  | 12.35232356 | 6.773485055 |
| 1.592862067 | 11.91116915 | 6.752015607 |
| 2.3892931   | 11.02886032 | 6.709076711 |
| 3.58393965  | 9.705397083 | 6.644668366 |
| 3.58393965  | 9.705397083 | 6.644668366 |
| 8.362525849 | 4.852698542 | 6.607612195 |
| 4.380370683 | 8.823088257 | 6.60172947  |
| 9.557172399 | 3.529235303 | 6.543203851 |
| 1.991077583 | 11.02886032 | 6.509968952 |
| 2.787508616 | 10.1465515  | 6.467030056 |
| 7.167879299 | 5.735007367 | 6.451443333 |
| 3.58393965  | 9.26424267  | 6.42409116  |
| 5.973232749 | 6.617316193 | 6.295274471 |
| 7.964310333 | 4.411544129 | 6.187927231 |
| 1.592862067 | 10.58770591 | 6.090283988 |
| 1.991077583 | 10.1465515  | 6.06881454  |
| 2.3892931   | 9.705397083 | 6.047345091 |
| 9.158956882 | 2.646926477 | 5.90294168  |
| 1.592862067 | 10.1465515  | 5.869706781 |
| 5.973232749 | 5.735007367 | 5.854120058 |
| 1.991077583 | 9.705397083 | 5.848237333 |
| 6.371448266 | 5.293852954 | 5.83265061  |
| 2.3892931   | 9.26424267  | 5.826767885 |
| 2.787508616 | 8.823088257 | 5.805298437 |
| 2.787508616 | 8.823088257 | 5.805298437 |
| 3.185724133 | 8.381933844 | 5.783828989 |
| 3.185724133 | 8.381933844 | 5.783828989 |
| 5.176801716 | 6.17616178  | 5.676481748 |
| 5.176801716 | 6.17616178  | 5.676481748 |
| 5.973232749 | 5.293852954 | 5.633542852 |
| 5.973232749 | 5.293852954 | 5.633542852 |
| 2.3892931   | 8.823088257 | 5.606190679 |
| 2.787508616 | 8.381933844 | 5.58472123  |
| 3.58393965  | 7.499625019 | 5.541782334 |

|             |             |             |
|-------------|-------------|-------------|
| 7.964310333 | 3.08808089  | 5.526195611 |
| 3.982155166 | 7.058470606 | 5.520312886 |
| 4.380370683 | 6.617316193 | 5.498843438 |
| 4.380370683 | 6.617316193 | 5.498843438 |
| 0.796431033 | 10.1465515  | 5.471491265 |
| 1.991077583 | 8.823088257 | 5.40708292  |
| 2.3892931   | 8.381933844 | 5.385613472 |
| 7.964310333 | 2.646926477 | 5.305618405 |
| 0.796431033 | 9.705397083 | 5.250914058 |
| 0.796431033 | 9.705397083 | 5.250914058 |
| 1.19464655  | 9.26424267  | 5.22944461  |
| 1.592862067 | 8.823088257 | 5.207975162 |
| 6.371448266 | 3.970389716 | 5.170918991 |
| 2.787508616 | 7.499625019 | 5.143566818 |
| 4.7785862   | 5.293852954 | 5.036219577 |
| 5.973232749 | 3.970389716 | 4.971811233 |
| 1.991077583 | 7.940779432 | 4.965928507 |
| 1.991077583 | 7.940779432 | 4.965928507 |
| 3.185724133 | 6.617316193 | 4.901520163 |
| 3.58393965  | 6.17616178  | 4.880050715 |
| 3.58393965  | 6.17616178  | 4.880050715 |
| 3.58393965  | 6.17616178  | 4.880050715 |
| 1.991077583 | 7.499625019 | 4.745351301 |
| 6.769663783 | 2.646926477 | 4.70829513  |
| 2.787508616 | 6.617316193 | 4.702412405 |
| 2.787508616 | 6.617316193 | 4.702412405 |
| 4.7785862   | 4.411544129 | 4.595065164 |
| 0.796431033 | 8.381933844 | 4.589182439 |
| 1.19464655  | 7.940779432 | 4.567712991 |
| 5.973232749 | 3.08808089  | 4.53065682  |
| 6.371448266 | 2.646926477 | 4.509187372 |
| 3.185724133 | 5.735007367 | 4.46036575  |
| 3.185724133 | 5.735007367 | 4.46036575  |
| 3.58393965  | 5.293852954 | 4.438896302 |
| 3.982155166 | 4.852698542 | 4.417426854 |
| 4.7785862   | 3.970389716 | 4.374487958 |
| 0.796431033 | 7.940779432 | 4.368605232 |
| 1.592862067 | 7.058470606 | 4.325666336 |
| 1.592862067 | 7.058470606 | 4.325666336 |
| 1.991077583 | 6.617316193 | 4.304196888 |
| 1.991077583 | 6.617316193 | 4.304196888 |
| 2.3892931   | 6.17616178  | 4.28272744  |
| 7.566094816 | 0.882308826 | 4.224201821 |
| 3.982155166 | 4.411544129 | 4.196849647 |
| 4.380370683 | 3.970389716 | 4.175380199 |

|             |             |             |
|-------------|-------------|-------------|
| 4.7785862   | 3.529235303 | 4.153910751 |
| 5.973232749 | 2.205772064 | 4.089502407 |
| 5.973232749 | 2.205772064 | 4.089502407 |
| 2.3892931   | 5.735007367 | 4.062150234 |
| 2.3892931   | 5.735007367 | 4.062150234 |
| 2.787508616 | 5.293852954 | 4.040680785 |
| 3.58393965  | 4.411544129 | 3.997741889 |
| 3.982155166 | 3.970389716 | 3.976272441 |
| 0.398215517 | 7.499625019 | 3.948920268 |
| 0.398215517 | 7.499625019 | 3.948920268 |
| 0.398215517 | 7.499625019 | 3.948920268 |
| 1.592862067 | 6.17616178  | 3.884511923 |
| 2.787508616 | 4.852698542 | 3.820103579 |
| 3.58393965  | 3.970389716 | 3.777164683 |
| 4.7785862   | 2.646926477 | 3.712756338 |
| 1.19464655  | 6.17616178  | 3.685404165 |
| 2.3892931   | 4.852698542 | 3.620995821 |
| 3.58393965  | 3.529235303 | 3.556587476 |
| 1.19464655  | 5.735007367 | 3.464826959 |
| 1.991077583 | 4.852698542 | 3.421888062 |
| 1.991077583 | 4.852698542 | 3.421888062 |
| 2.3892931   | 4.411544129 | 3.400418614 |
| 0.796431033 | 5.735007367 | 3.2657192   |
| 5.575017233 | 0.882308826 | 3.228663029 |
| 2.3892931   | 3.970389716 | 3.179841408 |
| 3.58393965  | 2.646926477 | 3.115433063 |
| 3.982155166 | 2.205772064 | 3.093963615 |
| 0.796431033 | 5.293852954 | 3.045141994 |
| 1.19464655  | 4.852698542 | 3.023672546 |
| 1.592862067 | 4.411544129 | 3.002203098 |
| 1.592862067 | 4.411544129 | 3.002203098 |
| 1.592862067 | 4.411544129 | 3.002203098 |
| 2.3892931   | 3.529235303 | 2.959264201 |
| 2.787508616 | 3.08808089  | 2.937794753 |
| 2.787508616 | 3.08808089  | 2.937794753 |
| 3.58393965  | 2.205772064 | 2.894855857 |
| 0.398215517 | 5.293852954 | 2.846034236 |
| 0.398215517 | 5.293852954 | 2.846034236 |
| 0.398215517 | 5.293852954 | 2.846034236 |
| 0.796431033 | 4.852698542 | 2.824564787 |
| 1.19464655  | 4.411544129 | 2.803095339 |
| 1.592862067 | 3.970389716 | 2.781625891 |
| 1.991077583 | 3.529235303 | 2.760156443 |
| 2.787508616 | 2.646926477 | 2.717217547 |
| 3.185724133 | 2.205772064 | 2.695748099 |

|             |             |             |
|-------------|-------------|-------------|
| 3.185724133 | 2.205772064 | 2.695748099 |
| 3.58393965  | 1.764617651 | 2.674278651 |
| 0.398215517 | 4.852698542 | 2.625457029 |
| 0.796431033 | 4.411544129 | 2.603987581 |
| 0.796431033 | 4.411544129 | 2.603987581 |
| 1.19464655  | 3.970389716 | 2.582518133 |
| 1.19464655  | 3.970389716 | 2.582518133 |
| 1.19464655  | 3.970389716 | 2.582518133 |
| 1.19464655  | 3.970389716 | 2.582518133 |
| 1.592862067 | 3.529235303 | 2.561048685 |
| 1.991077583 | 3.08808089  | 2.539579237 |
| 2.787508616 | 2.205772064 | 2.49664034  |
| 0.796431033 | 3.970389716 | 2.383410375 |
| 1.19464655  | 3.529235303 | 2.361940926 |
| 1.19464655  | 3.529235303 | 2.361940926 |
| 1.19464655  | 3.529235303 | 2.361940926 |
| 1.19464655  | 3.529235303 | 2.361940926 |
| 1.991077583 | 2.646926477 | 2.31900203  |
| 1.991077583 | 2.646926477 | 2.31900203  |
| 1.991077583 | 2.646926477 | 2.31900203  |
| 2.3892931   | 2.205772064 | 2.297532582 |
| 2.3892931   | 2.205772064 | 2.297532582 |
| 0.796431033 | 3.529235303 | 2.162833168 |
| 1.19464655  | 3.08808089  | 2.14136372  |
| 1.19464655  | 3.08808089  | 2.14136372  |
| 1.592862067 | 2.646926477 | 2.119894272 |
| 1.592862067 | 2.646926477 | 2.119894272 |
| 1.991077583 | 2.205772064 | 2.098424824 |
| 1.991077583 | 2.205772064 | 2.098424824 |
| 1.991077583 | 2.205772064 | 2.098424824 |
| 2.3892931   | 1.764617651 | 2.076955376 |
| 0.398215517 | 3.529235303 | 1.96372541  |
| 0.398215517 | 3.529235303 | 1.96372541  |
| 0.398215517 | 3.529235303 | 1.96372541  |
| 1.19464655  | 2.646926477 | 1.920786514 |
| 1.592862067 | 2.205772064 | 1.899317065 |
| 1.592862067 | 2.205772064 | 1.899317065 |
| 1.991077583 | 1.764617651 | 1.877847617 |
| 1.991077583 | 1.764617651 | 1.877847617 |
| 1.991077583 | 1.764617651 | 1.877847617 |
| 2.3892931   | 1.323463239 | 1.856378169 |
| 2.3892931   | 1.323463239 | 1.856378169 |
| 0.398215517 | 3.08808089  | 1.743148203 |
| 1.19464655  | 2.205772064 | 1.700209307 |
| 1.592862067 | 1.764617651 | 1.678739859 |

|             |             |             |
|-------------|-------------|-------------|
| 1.592862067 | 1.764617651 | 1.678739859 |
| 1.592862067 | 1.764617651 | 1.678739859 |
| 1.991077583 | 1.323463239 | 1.657270411 |
| 2.787508616 | 0.441154413 | 1.614331515 |
| 0.796431033 | 2.205772064 | 1.501101549 |
| 0.796431033 | 2.205772064 | 1.501101549 |
| 0.796431033 | 2.205772064 | 1.501101549 |
| 1.19464655  | 1.764617651 | 1.479632101 |
| 1.19464655  | 1.764617651 | 1.479632101 |
| 1.19464655  | 1.764617651 | 1.479632101 |
| 1.19464655  | 1.764617651 | 1.479632101 |
| 1.19464655  | 1.764617651 | 1.479632101 |
| 1.19464655  | 1.764617651 | 1.479632101 |
| 1.19464655  | 1.764617651 | 1.479632101 |
| 1.592862067 | 1.323463239 | 1.458162653 |
| 1.592862067 | 1.323463239 | 1.458162653 |
| 1.991077583 | 0.882308826 | 1.436693204 |
| 0.796431033 | 1.764617651 | 1.280524342 |
| 0.796431033 | 1.764617651 | 1.280524342 |
| 0.796431033 | 1.764617651 | 1.280524342 |
| 0.796431033 | 1.764617651 | 1.280524342 |
| 0.796431033 | 1.764617651 | 1.280524342 |
| 0.796431033 | 1.764617651 | 1.280524342 |
| 0.796431033 | 1.764617651 | 1.280524342 |
| 1.19464655  | 1.323463239 | 1.259054894 |
| 1.19464655  | 1.323463239 | 1.259054894 |
| 1.592862067 | 0.882308826 | 1.237585446 |
| 1.592862067 | 0.882308826 | 1.237585446 |
| 0.398215517 | 1.764617651 | 1.081416584 |
| 0.398215517 | 1.764617651 | 1.081416584 |
| 0.398215517 | 1.764617651 | 1.081416584 |
| 0.398215517 | 1.764617651 | 1.081416584 |
| 0.398215517 | 1.764617651 | 1.081416584 |
| 0.398215517 | 1.764617651 | 1.081416584 |
| 0.398215517 | 1.764617651 | 1.081416584 |
| 0.796431033 | 1.323463239 | 1.059947136 |
| 0.796431033 | 1.323463239 | 1.059947136 |
| 0.796431033 | 1.323463239 | 1.059947136 |
| 1.19464655  | 0.882308826 | 1.038477688 |
| 1.19464655  | 0.882308826 | 1.038477688 |
| 1.592862067 | 0.441154413 | 1.01700824  |
| 1.592862067 | 0.441154413 | 1.01700824  |
| 1.592862067 | 0.441154413 | 1.01700824  |
| 0.398215517 | 1.323463239 | 0.860839378 |
| 0.398215517 | 1.323463239 | 0.860839378 |
| 0.398215517 | 1.323463239 | 0.860839378 |



**ATGAATGGATTGAAGAGAACACAGACGAAC**

Cas9 Concentration (nM)

|      | Uncut Band  |             |             |             |
|------|-------------|-------------|-------------|-------------|
|      | replicate 1 | replicate 2 | replicate 3 | replicate 1 |
| 6.25 | 3340        | 3453        | 2522        | 123         |
| 12.5 | 3103        | 3220        | 2411        | 276         |
| 25   | 2416        | 2844        | 2078        | 471.5       |
| 50   | 2416        | 2023        | 1746        | 471.5       |
| 100  | 1896        | 1310        | 1135        | 932         |

**AGAAATTATCGAATACTTAAATAAAAAAGC**

Cas9 Concentration (nM)

|      | Uncut Band  |             |             |             |
|------|-------------|-------------|-------------|-------------|
|      | replicate 1 | replicate 2 | replicate 3 | replicate 1 |
| 6.25 | 1464        | 2182        | 2336        | 26.5        |
| 12.5 | 1619        | 1603        | 2276        | 61          |
| 25   | 1484        | 1577        | 2264        | 167.5       |
| 50   | 1225        | 1174        | 1681        | 416         |
| 100  | 608         | 492         | 905         | 788.5       |

**ATACGTGTAAAGACATATTAGATCGAGTCA**

Cas9 Concentration (nM)

|      | Uncut Band  |             |             |             |
|------|-------------|-------------|-------------|-------------|
|      | replicate 1 | replicate 2 | replicate 3 | replicate 1 |
| 6.25 | 1059        | 909         | 778         | 126         |
| 12.5 | 817         | 658         | 747         | 241.5       |
| 25   | 730         | 491         | 581         | 303         |
| 50   | 226         | 308         | 258         | 407.5       |
| 100  | 163         | 48          | 163         | 401.5       |

**CGTGTAAGACATATTAGATCGAGTCAAGG**

Cas9 Concentration (nM)

|      | Uncut Band  |             |             |             |
|------|-------------|-------------|-------------|-------------|
|      | replicate 1 | replicate 2 | replicate 3 | replicate 1 |
| 6.25 | 2064        | 1505        | 1505        | 148         |
| 12.5 | 1899        | 1079        | 1836        | 333         |
| 25   | 1622        | 839         | 1698        | 549         |
| 50   | 1285        | 577         | 1142        | 744.5       |
| 100  | 339         | 209         | 987         | 894.5       |



| Cut Band    |             | Percentage Cut |             |             | Average     | St. Dev.    |
|-------------|-------------|----------------|-------------|-------------|-------------|-------------|
| replicate 2 | replicate 3 | replicate 1    | replicate 2 | replicate 3 |             |             |
| 140.5       | 94.5        | 3.55183367     | 3.909837206 | 3.611695012 | 3.691121963 | 0.19176317  |
| 282         | 217.5       | 8.16809707     | 8.052541405 | 8.274681377 | 8.165106617 | 0.111100175 |
| 505.5       | 359         | 16.32900433    | 15.09180475 | 14.73122692 | 15.384012   | 0.838010723 |
| 797         | 410         | 16.32900433    | 28.26241135 | 19.01669759 | 21.20270442 | 6.259833878 |
| 1011        | 653.5       | 32.95615276    | 43.55881086 | 36.53899916 | 37.68465426 | 5.393374073 |

| Cut Band    |             | Percentage Cut |             |             | Average     | St. Dev.    |
|-------------|-------------|----------------|-------------|-------------|-------------|-------------|
| replicate 2 | replicate 3 | replicate 1    | replicate 2 | replicate 3 |             |             |
| 56.5        | 47.5        | 1.77792687     | 2.524011615 | 1.992867632 | 2.098268706 | 0.38404772  |
| 90          | 73          | 3.630952381    | 5.316007088 | 3.107705407 | 4.018221625 | 1.153963682 |
| 215         | 222         | 10.14229488    | 11.99776786 | 8.930008045 | 10.35669026 | 1.545076568 |
| 481         | 436.5       | 25.3503961     | 29.06344411 | 20.61393152 | 25.00925724 | 4.235073497 |
| 666.5       | 858.5       | 56.46258503    | 57.53129046 | 48.68159909 | 54.2251582  | 4.830509132 |

| Cut Band    |             | Percentage Cut |             |             | Average     | St. Dev.    |
|-------------|-------------|----------------|-------------|-------------|-------------|-------------|
| replicate 2 | replicate 3 | replicate 1    | replicate 2 | replicate 3 |             |             |
| 110.5       | 80          | 10.63291139    | 10.8386464  | 9.324009324 | 10.26518904 | 0.821551071 |
| 190.5       | 128.5       | 22.81530468    | 22.4513848  | 14.67732724 | 19.9813389  | 4.597011444 |
| 273.5       | 231.5       | 29.33204259    | 35.77501635 | 28.49230769 | 31.19978888 | 3.984447074 |
| 326.5       | 337.5       | 64.32517758    | 51.45784082 | 56.67506297 | 57.48602713 | 6.471888133 |
| 428         | 439         | 71.12488928    | 89.91596639 | 72.92358804 | 77.9881479  | 10.36887022 |

| Cut Band    |             | Percentage Cut |             |             | Average     | St. Dev.    |
|-------------|-------------|----------------|-------------|-------------|-------------|-------------|
| replicate 2 | replicate 3 | replicate 1    | replicate 2 | replicate 3 |             |             |
| 82.5        | 90.5        | 6.690777577    | 5.196850394 | 5.672203071 | 5.853277014 | 0.763246642 |
| 128         | 198         | 14.91935484    | 10.6048053  | 9.734513274 | 11.75289114 | 2.776548456 |
| 232         | 324         | 25.28788577    | 21.66199813 | 16.02373887 | 20.99120759 | 4.668358853 |
| 411.5       | 570         | 36.68391229    | 41.6287304  | 33.29439252 | 37.20234507 | 4.191285766 |
| 495.5       | 769         | 72.5172274     | 70.33356991 | 43.79271071 | 62.21450267 | 15.99105701 |

| Spacer                         | Replicate 1  | Replicate 2  | Replicate 3  |
|--------------------------------|--------------|--------------|--------------|
| None (control)                 | 450000000000 | 300000000000 | 300000000000 |
| ATGAATGGATTGAAGAGAACACAGACGAAC | 750000       | 400000       | 900000       |
| AGAAATTATCGAATACTTAAATAAAAAAGC | 1500000      | 950000       | 1400000      |

| Spacer                         | Replicate 1  | Replicate 2  | Replicate 3  |
|--------------------------------|--------------|--------------|--------------|
| None (control)                 | 550000000000 | 550000000000 | 500000000000 |
| CGTGTAAGACATATTAGATCGAGTCAAGG  | 450000       | 450000       | 750000       |
| ATACGTGTAAAGACATATTAGATCGAGTCA | 1150000      | 900000       | 850000       |

| <b>Average</b> | <b>StDev</b> |
|----------------|--------------|
| 35000000000    | 8660254038   |
| 683333.3333    | 256580.072   |
| 1283333.333    | 292973.2639  |

| <b>Average</b> | <b>StDev</b> |
|----------------|--------------|
| 53333333333    | 2886751346   |
| 550000         | 173205.0808  |
| 966666.6667    | 160727.5127  |

| Sample | Oligo                          | Number of Reads |             |             |
|--------|--------------------------------|-----------------|-------------|-------------|
|        |                                | Replicate 1     | Replicate 2 | Replicate 3 |
| 1      | ATGAATGGATTGAAGAGAACACAGACGAAC | 31              | 29          | 25          |
|        | AGAAATTATCGAATACTTAAATAAAAAAGC | 1               | 1           | 1           |
| 2      | CGTGTAAGACATATTAGATCGAGTCAAGG  | 36              | 6           | 43          |
|        | ATACGTGTAAAGACATATTAGATCGAGTCA | 0               | 0           | 1           |

| Percent Acquired |             |             | Percent Acquired | St. Dev.    |
|------------------|-------------|-------------|------------------|-------------|
| Replicate 1      | Replicate 2 | Replicate 3 |                  |             |
| 96.875           | 96.666667   | 96.153846   | 96.56517094      | 0.371135763 |
| 3.125            | 3.33333333  | 3.8461538   | 3.43482906       | 0.371135763 |
| 100              | 100         | 97.727273   | 99.24242424      | 1.312159703 |
| 0                | 0           | 2.2727273   | 0.757575758      | 1.312159703 |

| Oligo                          | Number of Reads |             |             | Pe        |
|--------------------------------|-----------------|-------------|-------------|-----------|
|                                | Replicate 1     | Replicate 2 | Replicate 3 |           |
| ATGAATGGATTGAAGAGAACACAGACGAAC | 103             | 115         | 122         | 23.409091 |
| ATGAATGGATGAATACTTAAACAGACGAAC | 58              | 65          | 66          | 13.181818 |
| AGAAATTATCGAATACTTAAACAGACGAAC | 52              | 59          | 51          | 11.818182 |
| AGAAATTATCTGAAGAGAACACAGACGAAC | 62              | 44          | 55          | 14.090909 |
| AGAAATTATCGAATAAGAACACAGACGAAC | 59              | 52          | 14          | 13.409091 |
| ATGAATGGATTGAAGAGAACATAAAAAAGC | 27              | 19          | 18          | 6.1363636 |
| ATGAATGGATGAATACTTAAATAAAAAAGC | 14              | 32          | 17          | 3.1818182 |
| ATGAATGGATTGAAGCTTAAATAAAAAAGC | 26              | 8           | 25          | 5.9090909 |
| AGAAATTATCGAATACTTAAATAAAAAAGC | 19              | 12          | 26          | 4.3181818 |
| AGAAATTATCTGAAGAGAACATAAAAAAGC | 20              | 22          | 15          | 4.5454545 |

| Percent Acquired |             | Percent Acquired | St. Dev.    |
|------------------|-------------|------------------|-------------|
| Replicate 2      | Replicate 3 |                  |             |
| 26.869159        | 29.828851   | 26.70236688      | 3.213128401 |
| 15.186916        | 16.136919   | 14.8352178       | 1.508616697 |
| 13.785047        | 12.469438   | 12.69088873      | 1.001957998 |
| 10.280374        | 13.447433   | 12.60623856      | 2.039791779 |
| 12.149533        | 3.4229829   | 9.660535501      | 5.438466576 |
| 4.4392523        | 4.400978    | 4.992197989      | 0.991061301 |
| 7.4766355        | 4.1564792   | 4.938310971      | 2.25162378  |
| 1.8691589        | 6.1124694   | 4.630239742      | 2.393327465 |
| 2.8037383        | 6.3569682   | 4.492962784      | 1.783051308 |
| 5.1401869        | 3.6674817   | 4.451041041      | 0.740878278 |

| Spacer Sequence       | Location | PAM | Early Time Point Reads | Late Time Point Reads |
|-----------------------|----------|-----|------------------------|-----------------------|
| CAATCCATTCTATTGCT     | 3503     | TGG | 11641                  | 220287                |
| TTTTAATAACCTCAACATCT  | 1070     | TGG | 9243                   | 181490                |
| CGTTCCATTGAATACTGTGT  | 2368     | AGG | 7845                   | 223481                |
| TGAAGCATAATACTGCTACT  | 3088     | AGG | 7621                   | 125781                |
| ATAAAAAAACTGCTACTTGT  | 3239     | TGG | 7600                   | 121667                |
| AAACATGTTGCGATGATGTC  | 2048     | AGG | 6812                   | 172152                |
| GCGCTTCAATAGTGATAGTA  | 4338     | GGG | 5691                   | 39818                 |
| AGTATGCTTACTTTTTCTTG  | 3823     | TGG | 5401                   | 105921                |
| TTCAAAAGTTTAGTATCTAT  | 698      | AGG | 5120                   | 40111                 |
| AGAAAAACAACAACCTTAAT  | 2524     | AGG | 5040                   | 125782                |
| TCTGATGAATATTCATCTCT  | 1424     | CGG | 5034                   | 177336                |
| GTAGAAGTACAGTATAACAAC | 2918     | TGG | 4662                   | 81725                 |
| ACTTTCCATTACTTAAATCA  | 17090    | CGG | 4462                   | 82822                 |
| AGCAATTCACACCCGCACAG  | 998      | TGG | 4211                   | 100312                |
| TGAAGAGAACACAGACGAAC  | 3540     | AGG | 4123                   | 99045                 |
| TAGAGATATAGAACCTTCACT | 5384     | GGG | 4084                   | 84992                 |
| TACATTGATTATTCACCAAC  | 2983     | AGG | 3955                   | 111321                |
| TGTACACGAGCATAGCTACC  | 23485    | AGG | 3773                   | 170810                |
| ATTGGAGCATGCAAATAACT  | 1407     | TGG | 3728                   | 65144                 |
| ACACCTCAATATACTTGC    | 15249    | TGG | 3409                   | 71755                 |
| TTGATTCGTGCCACTGTGC   | 993      | GGG | 3245                   | 67452                 |
| GTCAGTATGTACAGATTAAT  | 4241     | AGG | 3211                   | 82107                 |
| ATTAATTATGCTCGTAAGAA  | 1241     | CGG | 3108                   | 94112                 |
| ACTTTATCTAACATGATACA  | 804      | CGG | 3077                   | 55382                 |
| AGCAATTCACACCCGCACAG  | 998      | TGG | 3017                   | 34010                 |
| GTGAATTGCTAGTAGTGTGT  | 1181     | TGG | 2881                   | 63717                 |
| TTAGAATTGACACCTCAAGA  | 873      | AGG | 2640                   | 91081                 |
| ATTGAATTAGTTACTCGATT  | 4866     | AGG | 2583                   | 92039                 |
| TACATTGATTATTCACCAAC  | 2983     | AGG | 2544                   | 52290                 |
| AGTAAGACGCCAAAAGTAAC  | 2465     | AGG | 2451                   | 25848                 |
| AGATGAAAAAACGACTATAA  | 165      | AGG | 2413                   | 32340                 |
| AGCAATTCACACCCGCACAG  | 998      | TGG | 2334                   | 28651                 |
| AATAAGGAGTAACTCGTAT   | 17877    | AGG | 2316                   | 55672                 |
| ATAAAAAAACTGCTACTTGT  | 3239     | TGG | 2173                   | 55155                 |
| TGAAGCATAATACTGCTACT  | 3088     | AGG | 2072                   | 58120                 |
| AATTTAAGTGCTAAAGCTAA  | 6970     | AGG | 1908                   | 47371                 |
| AAATTACCTGACATAGATGA  | 17645    | AGG | 1867                   | 78248                 |
| AAACAATAAACTTTTTATGG  | 11602    | AGG | 1840                   | 55614                 |
| CATTAACGAAGGTGGAACAA  | 3991     | CGG | 1816                   | 41668                 |
| CATATTAGATCGAGTCAAGG  | 12415    | AGG | 1803                   | 16873                 |
| TTTTTTACCTCAAATTTTAC  | 4075     | AGG | 1748                   | 83851                 |
| GAGAACAAAACCATCCTACC  | 827      | CGG | 1711                   | 89221                 |
| TTCATTTTAAAAGGTCATAT  | 3400     | GGG | 1663                   | 10348                 |
| CTTTATCTAACATGATACAC  | 805      | GGG | 1659                   | 62364                 |



|                      |       |     |      |       |
|----------------------|-------|-----|------|-------|
| CATTAACGAAGGTGGAACAA | 3991  | CGG | 1654 | 30996 |
| ACTTTATCTAACATGATACA | 804   | CGG | 1629 | 64525 |
| ATTAGAGCCTCAATATGCTT | 16315 | AGG | 1620 | 69342 |
| ACGTGTAGTTAATACTCCGT | 20059 | TGG | 1591 | 68130 |
| AAGTTACTACTCACACTA   | 259   | AGG | 1557 | 87758 |
| ATTAACGAATGAACTCAAT  | 18056 | AGG | 1544 | 9831  |
| ATTGGAGCATGCAAATAACT | 1407  | TGG | 1501 | 16770 |
| AAGAAATCGTTAGCACTAAT | 20219 | GGG | 1482 | 2615  |
| TTAATACGTCCATCAACAAG | 28432 | CGG | 1470 | 69662 |
| TCTAAATTCAGTGATGTATT | 15995 | AGG | 1464 | 55595 |
| ACACCTCAATATATACTTGC | 15249 | TGG | 1462 | 69532 |
| CCACACCCTTGCGTTTAATA | 2334  | AGG | 1442 | 53782 |
| CAAAAAGCTGAAGAAAATAA | 5073  | CGG | 1386 | 65236 |
| ACAACATCGTCGATAATAAG | 36439 | GGG | 1356 | 67907 |
| TCTTTTCGATTCGATCTAAA | 17217 | TGG | 1331 | 51710 |
| AAATAAAAAGATGCAACAAT | 399   | GGG | 1319 | 31521 |
| AAACAATCAAGAGAAAAACA | 500   | AGG | 1300 | 7027  |
| GGATCTAAGTCAGTTTCAGC | 22166 | TGG | 1268 | 63346 |
| TGAATCAATCACACTTATTG | 12809 | AGG | 1266 | 39587 |
| AAATTCCACTTTGTTATTAC | 4283  | AGG | 1255 | 365   |
| GATTCCAATACTACGTTAAT | 1461  | AGG | 1239 | 27552 |
| GAGTCAATTGTTAATATGAT | 13836 | AGG | 1192 | 457   |
| AAGAAAGTTTTAACTTAAGG | 930   | AGG | 1191 | 214   |
| GCATACACACATAAGTTTAT | 237   | TGG | 1185 | 26573 |
| TTTAGTTTTTAAAAATTCTT | 8442  | TGG | 1173 | 28991 |
| TCTAAAAAACCTAAGTCAAC | 21416 | AGG | 1171 | 57115 |
| AGAAAAACAACAACCTTAAT | 2524  | AGG | 1155 | 271   |
| TAATTTATACGTAGACCTTT | 20017 | CGG | 1153 | 1616  |
| AGATGAGAATGACTTAGATA | 3480  | TGG | 1140 | 45738 |
| TACGAGTGAACCTAAATATC | 17454 | AGG | 1134 | 54375 |
| TCCAATTGATCCGTGCCAGT | 7596  | TGG | 1133 | 46544 |
| TCTCCCAATCATTAAACGT  | 4186  | TGG | 1099 | 6284  |
| TAACCGTATCGATTAAGATA | 40130 | CGG | 1084 | 54015 |
| ACGTGTAGTTAATACTCCGT | 20059 | TGG | 1069 | 32629 |
| AGTAAGACGCCAAAAGTAAC | 2465  | AGG | 1062 | 37539 |
| CGCTGATAAAAGTAACTAT  | 16058 | CGG | 1056 | 55948 |
| TTTGATACCAATGATCTTAT | 4917  | TGG | 1052 | 23591 |
| ATCATCAACACTATTTCTAA | 16631 | TGG | 1051 | 47347 |
| ATTGGTCGACGTTTGAATAT | 16411 | TGG | 1044 | 43673 |
| ATTAGAGCCTCAATATGCTT | 16315 | AGG | 1027 | 16084 |
| ATTTCTAATTTCCATCTGC  | 24053 | TGG | 1007 | 35972 |
| AACGCTTAAACCAACTGAAT | 20431 | AGG | 1004 | 803   |
| ATTTAAGTGCTAAAGCTAAA | 6971  | GGG | 996  | 17644 |
| AAGTAGCGCAATGAGTATGT | 16792 | AGG | 992  | 892   |
| ATTAACAATAAAACTTTTA  | 11599 | TGG | 991  | 55660 |

|                       |       |     |     |       |
|-----------------------|-------|-----|-----|-------|
| TATTGAAGAAAGGTTATAAC  | 14104 | AGG | 979 | 33749 |
| CATGCCTACACAGTATTCAA  | 2380  | TGG | 971 | 17652 |
| AACACCTATTAACGTAGTAT  | 1449  | TGG | 970 | 29057 |
| GGATATCGAAAAAGAAGCGC  | 9340  | TGG | 953 | 15822 |
| TTTTAAAAATCGGAAGGTTT  | 14717 | CGG | 952 | 46518 |
| ATCTAATCGAACAAGAAGTA  | 19145 | CGG | 951 | 34436 |
| CACCTTAAAACGCTAAATCT  | 5152  | TGG | 927 | 37572 |
| AAAAATAATCATGCGAGTTG  | 9227  | AGG | 924 | 40368 |
| AGTGGTATAGGAGCTATACG  | 15408 | TGG | 913 | 39382 |
| TATAGTTGGGATCAATGTTG  | 13006 | AGG | 899 | 231   |
| CGCTAACATAAAGAACATAT  | 38272 | TGG | 892 | 6315  |
| GACACCAATTTCTTCAGAAA  | 756   | GGG | 892 | 203   |
| AACTAAGTAACACTGAATTA  | 23899 | TGG | 883 | 48211 |
| GCATAAAAAATGGTATTAGG  | 3051  | AGG | 880 | 17411 |
| TGCCAAGGAAATCCTATGCA  | 338   | AGG | 872 | 263   |
| GATTCACCCACAACAATATA  | 21830 | TGG | 871 | 19576 |
| CTTAGACCAGAAACACTTTT  | 7552  | TGG | 846 | 10051 |
| TACCCATACCGCGTAACACA  | 17082 | AGG | 844 | 24605 |
| GGACAAAAATCAATCAATAG  | 7069  | TGG | 821 | 16777 |
| CCCTATAATGTTATTTTTGT  | 16769 | TGG | 820 | 32970 |
| GTAGAAGTACAGTATAACAAC | 2918  | TGG | 812 | 15450 |
| AAGAGGTATTTAAATATGTT  | 16156 | TGG | 804 | 38024 |
| ATTAACAATAAAACTTTTA   | 11599 | TGG | 802 | 44412 |
| AAGATTTAATAGATCTTAGC  | 24027 | AGG | 801 | 26657 |
| GTCAAGATGTATTACGAAAT  | 3328  | AGG | 793 | 36730 |
| TGCTAAAGTCATATATACTA  | 39930 | CGG | 792 | 11506 |
| ATAATAAAATTATAACCAGAA | 6865  | AGG | 778 | 29041 |
| TTTTGTATGCGTCAATGAGT  | 12308 | TGG | 771 | 21751 |
| TATATGACGCAAGCTCGTCC  | 30146 | AGG | 770 | 41224 |
| TTTGTTTCGGCGAACTTCAA  | 2724  | AGG | 765 | 5235  |
| TAACCTAGTCATGAAATGGT  | 3573  | AGG | 751 | 41721 |
| AAGATTTAATAGATCTTAGC  | 24027 | AGG | 749 | 276   |
| AACACCTATTAACGTAGTAT  | 1449  | TGG | 746 | 38449 |
| TATAATTCATTCATGTTATT  | 15351 | TGG | 731 | 6034  |
| ATTGAATTAGTTACTCGATT  | 4866  | AGG | 731 | 168   |
| GGACAAAAATCAATCAATAG  | 7069  | TGG | 727 | 23198 |
| TACTGATATTCAACTTCTGT  | 9289  | AGG | 726 | 743   |
| ATATTTGGCAATGTGTTCCG  | 24980 | TGG | 720 | 32414 |
| TCTTTTCTGCTAATTCATCA  | 14170 | CGG | 712 | 18310 |
| AAGAAAGTTTTAACTTAAGG  | 930   | AGG | 702 | 1162  |
| TAACCTATATCATTTCGTCAT | 3617  | AGG | 695 | 9229  |
| CAATATAAAACGAAAAACGG  | 3303  | AGG | 679 | 24455 |
| CCGAAAGCGTTTAGAGATGC  | 31061 | AGG | 678 | 25933 |
| TGGATTTAACTAGAATAACT  | 25431 | GGG | 664 | 32380 |
| TAATTAACCTTAGTCATGAAA | 3569  | TGG | 661 | 178   |

|                        |       |     |     |       |
|------------------------|-------|-----|-----|-------|
| AGCGTTTGATGAAATACTTG   | 11744 | AGG | 660 | 33684 |
| AAATAACTTTATCCACATAA   | 6704  | AGG | 652 | 11834 |
| TTCTATACTTCACTACAGCA   | 3154  | TGG | 650 | 27934 |
| GCGTTTGATGAAATACTTGA   | 11745 | GGG | 648 | 1870  |
| TCTTTATACTCGTAACCATT   | 7797  | CGG | 638 | 12034 |
| CATTGGAAACGTTTAAGAAC   | 12011 | TGG | 636 | 12664 |
| TTGATACGAATGGTGATGTT   | 16731 | AGG | 629 | 30676 |
| TGGAAATTCAATGAAGATGA   | 4965  | AGG | 627 | 15182 |
| TGCGCTTCAATAGTGATAGT   | 4339  | AGG | 619 | 31706 |
| TCTTTTCGATTCGATCTAAA   | 17217 | TGG | 619 | 21649 |
| CCATCCTACCCGTAATAAAA   | 837   | TGG | 618 | 9689  |
| AATAGAGCTAGGGAGTTTAA   | 3709  | CGG | 615 | 17383 |
| AGAACTATTGAGTACGAGG    | 3789  | AGG | 612 | 23209 |
| AGACGTGAACTCTTCAAAGA   | 23552 | AGG | 597 | 21547 |
| CGTTCATAGAACATACCTGA   | 15671 | TGG | 594 | 14384 |
| TTAATATTGCAAGGTTCATA   | 8038  | CGG | 592 | 11408 |
| GTTTGATGTTCCGAGTAAAG   | 18026 | AGG | 588 | 28740 |
| ACTACAGTACCGTTTTTACC   | 36838 | GGG | 587 | 30546 |
| TATTACTTATACCGAGAAGA   | 8637  | TGG | 586 | 257   |
| TTCGTCATTGACATTAACGA   | 3980  | AGG | 584 | 19503 |
| TTAACCAAGCAATAGATGAA   | 3515  | TGG | 581 | 27680 |
| TATGAAAAAGATGATGATAA   | 16832 | TGG | 580 | 13797 |
| GTTAAAATTAATACTATTTTC  | 12660 | AGG | 579 | 26943 |
| ATATCTGAATTGTTATCAGT   | 3651  | TGG | 579 | 14565 |
| ACTAAGACATCAATTTTAGT   | 2246  | TGG | 579 | 531   |
| GGTATGAATAGAATGACGTT   | 14900 | AGG | 576 | 2570  |
| TCAACTAATTCAAGAATTAC   | 39451 | AGG | 574 | 28649 |
| TTGACACAACACAAACATCA   | 27197 | GGG | 571 | 8341  |
| AAAAACAACAACCTTAATAG   | 2527  | AGG | 570 | 29704 |
| AAAATAAAAAGATGCAACAA   | 400   | TGG | 569 | 5218  |
| ACATTTTACAACACTAATC    | 27367 | AGG | 567 | 17935 |
| TCAATTAGTTTGTCCGCCTA   | 5991  | TGG | 564 | 28605 |
| ATTGAAGAATTTGATGATAA   | 4433  | CGG | 555 | 8327  |
| GTTCAAATAATGATACTGGT   | 20325 | TGG | 553 | 13918 |
| ATTCACCCACAACAATATAT   | 21829 | GGG | 551 | 20633 |
| AGTTCACTATGAAAACACTACG | 10991 | CGG | 550 | 13711 |
| GGATTACCACTATCTTATAC   | 20177 | TGG | 549 | 20976 |
| ATTGAATTGCTATCATATTC   | 13883 | CGG | 544 | 5486  |
| ATTTCTAATTTCCATCTGC    | 24053 | TGG | 544 | 1641  |
| AGGCTTACCATGAATCGCAC   | 39247 | CGG | 542 | 26333 |
| GTGGAAGATTATTTTATCTC   | 27535 | CGG | 541 | 2729  |
| TTGATACGATCCATCAACAT   | 8124  | TGG | 535 | 16000 |
| TTTGATACCAATGATCTTAT   | 4917  | TGG | 530 | 8972  |
| CAACCTACTCATGTCGAAAA   | 7726  | AGG | 525 | 24799 |
| GCGATCAGTTAAAACTACA    | 24537 | TGG | 522 | 3311  |

|                       |       |     |     |       |
|-----------------------|-------|-----|-----|-------|
| GTGAAACACGCTGTACAAAC  | 22371 | AGG | 516 | 25605 |
| TTTAAACGACGTATCGATAT  | 30713 | TGG | 512 | 21869 |
| TTACAAACAAAATCGAACAT  | 1802  | CGG | 510 | 27958 |
| TTATCTAATTGTTTATCGAT  | 1389  | TGG | 502 | 25583 |
| TACACACGATCAATCACAAA  | 32947 | CGG | 502 | 20547 |
| GAAAAACAAAGATTTGTTTC  | 6141  | GGG | 501 | 26275 |
| TTTTTTACCTCAAATTTTAC  | 4075  | AGG | 500 | 13768 |
| TTTCAATGTTTGGTACAAGT  | 26037 | TGG | 500 | 11966 |
| CTTTGTTTCAAACGTATTAG  | 4474  | AGG | 497 | 16668 |
| CACAACGAGCAACATGCGAT  | 5751  | TGG | 493 | 22783 |
| ATTCTCATTCAAATCAAAGT  | 15738 | CGG | 485 | 24796 |
| ATTTGAATCATCACATTTAT  | 11324 | TGG | 483 | 3625  |
| TCCTTTCACTTATAATCACT  | 26829 | TGG | 482 | 26031 |
| TTCATCCGTTTAAATCAATA  | 20938 | AGG | 482 | 13330 |
| ACAGAATGAACTATGAAACA  | 11352 | GGG | 481 | 7986  |
| AGGAATCATGAAAGACAAGA  | 12358 | TGG | 477 | 23416 |
| AGAAATGTTAAAAAGTGTAT  | 39712 | AGG | 475 | 9163  |
| ATAACAACATTATACACGAA  | 2773  | AGG | 472 | 147   |
| AGAAAGCAAGTGCATGGGAT  | 11502 | AGG | 467 | 222   |
| GTTAGAAAAACGCGACGCAG  | 19224 | AGG | 466 | 120   |
| TTAATATTGCAAGGTTTCATA | 8038  | CGG | 464 | 15644 |
| AACTAGAGTAATTAACATAA  | 14532 | AGG | 460 | 23430 |
| AGAACTATTGAGTACGAGG   | 3789  | AGG | 452 | 1649  |
| AATCACGGAGCAAAGCGTAC  | 15147 | AGG | 448 | 1343  |
| CGCTATTAATGTTAGTACAA  | 27769 | AGG | 443 | 17038 |
| TCACTATAACAATTGCTTGT  | 12254 | TGG | 443 | 6247  |
| ACAGTTCGCTACACAATACG  | 21938 | AGG | 442 | 16850 |
| AAGAGAGTTATATAAAGCTT  | 1876  | TGG | 442 | 10576 |
| TGCAAAAGATTTCTTTAATG  | 19849 | AGG | 442 | 101   |
| GACCGGTTTACCATCATACA  | 40364 | AGG | 432 | 19493 |
| TTACGTGCTCTCATTACAGT  | 18512 | TGG | 432 | 16963 |
| AAATAACTTTATCCACATAA  | 6704  | AGG | 432 | 10460 |
| AGTAGATTTAAAGGTGCGAA  | 36764 | AGG | 426 | 21128 |
| AAAAAAATTATGCTTGTAGC  | 38722 | CGG | 426 | 20829 |
| AATTAGAAATGTAAATGTAG  | 9415  | AGG | 420 | 16839 |
| TTATCTGCATTAAAGCGTAA  | 17417 | AGG | 416 | 19173 |
| ACGACATAAGCATGTTTAAT  | 3441  | TGG | 415 | 10339 |
| GTTTCAGAACGAACAAGGTT  | 17549 | AGG | 413 | 486   |
| GATACTTTGCCGTTATTACA  | 23067 | AGG | 409 | 19478 |
| ATGAATTGATAAAAAAGAAC  | 9498  | GGG | 407 | 113   |
| CCAACAAAATAACATTATA   | 16753 | GGG | 406 | 8839  |
| AACTAAATCAAATATGAAC   | 8351  | TGG | 405 | 20687 |
| TCTACTACGTCCGTAATGCT  | 4546  | AGG | 405 | 16491 |
| GACTCTTATTACAGTCTTGT  | 20536 | CGG | 405 | 5674  |
| GAAAATACAGATCCTAAAGC  | 15585 | AGG | 401 | 7212  |

|                       |       |     |     |       |
|-----------------------|-------|-----|-----|-------|
| ATGTATCAAGATACTGCATA  | 38893 | CGG | 396 | 13718 |
| AGTATAAAAGAATGTTTATA  | 10613 | TGG | 393 | 1978  |
| GCATACACACATAAGTTTAT  | 237   | TGG | 390 | 20218 |
| GTCACCTGATAACTTTTATT  | 37593 | AGG | 390 | 15201 |
| TCATCCAAATTGAAAAAGCA  | 2103  | TGG | 388 | 19001 |
| GTAGAGATATAGAACTTCAC  | 5383  | TGG | 388 | 4288  |
| CCGATTAAGTGCATAAATAGT | 25138 | AGG | 387 | 16541 |
| GTAGTAGAAGCAATTAGAAA  | 4577  | TGG | 385 | 3287  |
| GGTATGAATAGAATGACGTT  | 14900 | AGG | 384 | 17371 |
| TCTGATTAATATTTCTAAAT  | 3009  | TGG | 383 | 2664  |
| AATCCTTTTTTCGACATGAGT | 7713  | AGG | 383 | 1784  |
| CCCTATAATGTTATTTTTGT  | 16769 | TGG | 376 | 6122  |
| TCATTTGGTCAAAACTGGAA  | 38512 | CGG | 375 | 19802 |
| GAATATAAGCAAAACAAGCA  | 7862  | CGG | 375 | 11880 |
| AATCTCCGTTTAGTTAATAC  | 5967  | AGG | 373 | 18333 |
| GAATGACGGTATGAATATAT  | 6337  | CGG | 373 | 14595 |
| TCCTAAAATCCCTTTAAGCA  | 34242 | TGG | 372 | 20879 |
| CTTAATGTGTTTCATAGATTC | 37069 | AGG | 372 | 19097 |
| GAAACACTTTCTTCATCTAC  | 37945 | TGG | 371 | 537   |
| GAGAAATATAAGCGAAAAGG  | 18600 | TGG | 371 | 99    |
| TAGATATAAAGAGTCTATTA  | 15656 | AGG | 370 | 15015 |
| TCCAAGTGATTATAAGTGAA  | 26814 | AGG | 370 | 140   |
| TCATCCAAATTGAAAAAGCA  | 2103  | TGG | 369 | 148   |
| TACGTCAGCGATTTATAATC  | 30412 | CGG | 368 | 18001 |
| CTGAGAATTTTATTACATGA  | 12851 | CGG | 364 | 12524 |
| GTTTTAAACCCAAAGAATGA  | 6351  | CGG | 364 | 9996  |
| TTATCGAGTGTATAACCTGC  | 39333 | TGG | 363 | 13922 |
| CATTGGAAACGTTTAAGAAC  | 12011 | TGG | 361 | 394   |
| CTGTTCTATGAAAGTTGCAA  | 5489  | GGG | 359 | 11712 |
| GCCTAAAAATCTATCAACTA  | 19294 | AGG | 359 | 7887  |
| TTAATTAAGTAAAGTGTATT  | 37372 | AGG | 358 | 20701 |
| TATTTAATTATGAAAATCAC  | 4626  | AGG | 358 | 19345 |
| TTTATCTCTGTAGCAAACG   | 3935  | TGG | 358 | 14247 |
| AGCAAACGCACGCAAGTTTG  | 24682 | AGG | 354 | 39    |
| CTTTGTTTCAAACGTATTAG  | 4474  | AGG | 353 | 16203 |
| AATAAGCGCCATTCACTACA  | 10138 | TGG | 351 | 247   |
| ATCTTTAATGCGATGTCAGC  | 24590 | AGG | 348 | 16209 |
| TTTAAAAGAATAGCATCATT  | 6436  | TGG | 347 | 9621  |
| GAGTATAACGAAAGTTTTAC  | 28034 | AGG | 347 | 5305  |
| AATTGGCCACTGCTTTCAA   | 5117  | TGG | 345 | 17672 |
| AAGATTGAACAAATAGATAA  | 14978 | AGG | 345 | 14655 |
| ATATATAAAGCAACATGGTT  | 10250 | TGG | 343 | 386   |
| GTTGATTCTTCTATGCTATC  | 37542 | CGG | 342 | 17002 |
| TATGAATGAACATGAATTAA  | 13196 | GGG | 341 | 15457 |
| GAAGTAAAATCGAATACACC  | 31385 | GGG | 340 | 11001 |

|                       |       |     |     |       |
|-----------------------|-------|-----|-----|-------|
| AACTAAGTAACACTGAATTA  | 23899 | TGG | 339 | 18840 |
| TTGATACGATCCATCAACAT  | 8124  | TGG | 339 | 16229 |
| TCCAATTGATCCGTGCCAGT  | 7596  | TGG | 339 | 15071 |
| CGCAAAAATATTCATGTAA   | 3361  | CGG | 335 | 17524 |
| ATACACATGTAACAGAGAAA  | 138   | TGG | 333 | 16965 |
| AATGATTCTGACATTGCATT  | 22286 | GGG | 333 | 16956 |
| TTGCAAATGTGAAATCTATG  | 7839  | AGG | 332 | 3430  |
| TGAACCTAATAAAAAGTTATC | 37605 | AGG | 331 | 9037  |
| TGCCTCTATATGTGTTTTTC  | 2817  | TGG | 330 | 15598 |
| AATACTTGTGTTGTGTTACC  | 31387 | CGG | 329 | 282   |
| TAAATACAACAGGCTCAATA  | 17861 | AGG | 328 | 10711 |
| ACTCGACGACCAAGATGTTG  | 1077  | AGG | 327 | 7875  |
| ACAACCTTCACGACGCAATAA | 15028 | CGG | 326 | 14312 |
| GTTTAAGATATAGAATGCTT  | 10634 | TGG | 325 | 13463 |
| CTTTGAATGGTTTAATACAT  | 11994 | TGG | 324 | 5702  |
| GGAAGAATACACGATGTTGT  | 10947 | AGG | 323 | 6795  |
| GGGTGTCTTACTAACTTCC   | 34753 | CGG | 323 | 3031  |
| TCACTATAACAATTGCTTGT  | 12254 | TGG | 321 | 15950 |
| GTAGAGATATAGAACTTCAC  | 5383  | TGG | 321 | 199   |
| CTCAACTTTGCGAAGTCACT  | 13745 | CGG | 319 | 7718  |
| CGAGTGTGGGACGAATATAC  | 10926 | AGG | 314 | 3676  |
| GTTTTAGAGAATGTTTCTAC  | 6754  | AGG | 314 | 3113  |
| AAGATTTTATTAAAGCAAGA  | 7445  | TGG | 310 | 493   |
| AAACAATTGATGGATTTGTG  | 2871  | AGG | 308 | 388   |
| TTTACTTGTACTAGATGATA  | 8229  | TGG | 307 | 3190  |
| TAATTAACCTAGTCATGAAA  | 3569  | TGG | 305 | 15300 |
| GAGTGATGTCTGTTGTTACC  | 30829 | AGG | 305 | 2462  |
| TTTACCTTAATATCTTCTGC  | 20457 | AGG | 302 | 13819 |
| TCTATCAATAAATTGTCCGT  | 30182 | TGG | 302 | 111   |
| TACACACGATCAATCACAAA  | 32947 | CGG | 301 | 12514 |
| AAATGGTTTGACAATTCATT  | 38215 | AGG | 300 | 12340 |
| AACAGCTGAATGGTTAAACA  | 7515  | CGG | 299 | 1243  |
| CAACCAGCACATTACACATA  | 9862  | CGG | 298 | 6274  |
| ACTGTTCTATGAAAGTTGCA  | 5488  | AGG | 297 | 14011 |
| CCATTCGGGTGTTTTTTAGT  | 7782  | AGG | 297 | 2373  |
| TCTTATCTGAAGTATCTATG  | 24655 | TGG | 294 | 12735 |
| GATCTTATACGAAGTAAAGA  | 13617 | AGG | 293 | 15039 |
| ATCAGAATTTTAAATCAAGT  | 18403 | GGG | 292 | 1966  |
| AGATATGCTGGGTTCTGTAT  | 30949 | TGG | 292 | 381   |
| AACCACAATCCTAAATTAAT  | 40187 | AGG | 291 | 13543 |
| TAATGATGGAAGTATATTGT  | 7326  | CGG | 291 | 2746  |
| AGATTTTATTGAACAAGTAA  | 9900  | CGG | 288 | 556   |
| AATAGAGCTAGGGAGTTTAA  | 3709  | CGG | 288 | 165   |
| GTATCTGTTTTAATATACGT  | 12767 | TGG | 287 | 2399  |
| ATTAATTATGCTCGTAAGAA  | 1241  | CGG | 285 | 11646 |

|                          |       |     |     |       |
|--------------------------|-------|-----|-----|-------|
| GATTA AAAA ACTT AAAA ATA | 13269 | TGG | 285 | 1581  |
| GAAAAACAATAACAGAAGCT     | 25587 | TGG | 283 | 12953 |
| GCTGTAGTGAAGTATAGAAA     | 3134  | CGG | 281 | 6844  |
| GTTAAAATTA AAACTATTTTC   | 12660 | AGG | 280 | 10324 |
| ATATCTATTGATGTTGTA AA    | 11190 | TGG | 280 | 9566  |
| GACCATTATTTGATGCTAAC     | 20142 | GGG | 274 | 997   |
| TATAATTGCTTTTATATAGT     | 40003 | AGG | 273 | 13365 |
| AACTAACAAAACAAACTG       | 33695 | AGG | 273 | 5667  |
| ACTCATCGTTTGAATCGTCT     | 32540 | GGG | 272 | 8457  |
| ATCTTTCAACAACCAATGCT     | 15540 | CGG | 270 | 12519 |
| AGCACTCCTAATCGTCATCT     | 5893  | TGG | 270 | 4102  |
| AGCAAACGCAAAAACAAGAT     | 15112 | TGG | 270 | 222   |
| CTTAGACCAGAAACACTTTT     | 7552  | TGG | 267 | 4035  |
| ATAACTAGCTCAAAGCGTTA     | 9195  | TGG | 265 | 4947  |
| TGAATTTTACAGTCCTATGA     | 13169 | TGG | 264 | 12917 |
| GTGACATAACAATCCCTGA      | 37734 | AGG | 264 | 2962  |
| TTGAGTATTGCGAATCAAGT     | 12100 | AGG | 262 | 5413  |
| GAAGTACGACGAAAGTTATT     | 7641  | GGG | 261 | 12686 |
| TGCTAAAGTCATATATACTA     | 39930 | CGG | 261 | 3782  |
| AAACAATTGATGGATTTGTG     | 2871  | AGG | 260 | 11983 |
| TGCAAAAGATTTCTTTAATG     | 19849 | AGG | 259 | 11390 |
| TACACAAAATACAAAATCTA     | 32578 | CGG | 258 | 12851 |
| TCTAGAGCACCGTTAAAGAA     | 9976  | TGG | 258 | 9190  |
| ATTTTTAAAACATTCAGGCA     | 31824 | AGG | 258 | 77    |
| TACATACTCCAAACAATTGA     | 2882  | TGG | 258 | 76    |
| TAAATACAACAGGCTCAATA     | 17861 | AGG | 257 | 14666 |
| CTGAGAATTTTATTACATGA     | 12851 | CGG | 257 | 4752  |
| TAATTAAGGGGTGATTTTTA     | 37404 | TGG | 254 | 14326 |
| TGTGGATTCTCGTTTGATA      | 34169 | GGG | 253 | 13215 |
| TTCTATACTTCACTACAGCA     | 3154  | TGG | 252 | 12199 |
| AATAACAATACTAATAATGA     | 7312  | TGG | 252 | 7671  |
| GGAAGAATACACGATGTTGT     | 10947 | AGG | 251 | 5583  |
| GAAAGGTGATAAAGGCGAAC     | 36781 | CGG | 250 | 11473 |
| GAGTCTAAATTTAAATCGAG     | 19408 | TGG | 250 | 67    |
| AAATGATTCTGACATTGCAT     | 22287 | TGG | 249 | 3132  |
| TATGAAAAAGATGATGATAA     | 16832 | TGG | 246 | 311   |
| GTATGCTCAGATGTTAAAAG     | 14021 | AGG | 246 | 51    |
| GTCAGTATGTACAGATTAAT     | 4241  | AGG | 245 | 205   |
| ATTCAACATTCAGTTAAAGA     | 11781 | AGG | 244 | 8972  |
| AATCTCCGTTTAGTTAATAC     | 5967  | AGG | 244 | 1359  |
| TTTGTTCCGGCGAACTTCAA     | 2724  | AGG | 243 | 11092 |
| AGCAATCCATTTGAAAGCAG     | 5127  | TGG | 241 | 11467 |
| ACTTATTCCGTCGTTGCTAC     | 5238  | TGG | 240 | 2628  |
| TGTAGGCGATTCTGTAGATC     | 21229 | AGG | 238 | 166   |
| GGATTCTGAAATAGGTA AAA    | 16672 | TGG | 237 | 291   |

|                       |       |     |     |       |
|-----------------------|-------|-----|-----|-------|
| ATTAAGTACCTTGTTCTGC   | 19588 | TGG | 236 | 12740 |
| ATTCTCATTCAAATCAAAGT  | 15738 | CGG | 236 | 11930 |
| GAACGGGTTAACTCCTGGAA  | 9514  | TGG | 235 | 9981  |
| GAGATTTCCAAAGCAACGTA  | 23652 | AGG | 235 | 128   |
| CGAGTGTGGGACGAATATAC  | 10926 | AGG | 234 | 6968  |
| TAATATCACTTAGATATGCT  | 30960 | GGG | 233 | 10395 |
| AAAGGAGAACAAGGCGCACC  | 36836 | CGG | 233 | 9368  |
| AGATTTTATTGAACAAGTAA  | 9900  | CGG | 233 | 7191  |
| TAATTATTTCAACAAATGAA  | 6470  | TGG | 233 | 155   |
| ATATGAATGAACATGAATTA  | 13195 | AGG | 232 | 4221  |
| TCTCCAGTATCAATTAAGT   | 13220 | AGG | 232 | 2457  |
| TGTTCCATGCTTTTTCAATT  | 2091  | TGG | 231 | 262   |
| TCATACTAATTGAATTGTC   | 27063 | TGG | 229 | 59    |
| TATGCAATATACGTTGAATA  | 21519 | CGG | 228 | 8265  |
| CGTAGACCTTTTCGGCATTAA | 20026 | TGG | 228 | 192   |
| TTTGAGCTTGATTATGTTGA  | 27136 | TGG | 226 | 12628 |
| AGAAGTAAATCGAATACAC   | 31384 | CGG | 225 | 8268  |
| ACTTGTTCTTTATGATAATA  | 16121 | TGG | 225 | 3251  |
| TTTGTCACTTGGTATTGAAA  | 4945  | TGG | 224 | 10276 |
| ATGTAGTTGAATTCTTTGAA  | 11981 | TGG | 224 | 65    |
| TATTACTTATACCGAGAAGA  | 8637  | TGG | 223 | 11483 |
| TTGCCAACGCTTAAGTTGTT  | 38625 | AGG | 223 | 210   |
| TAACCGTATCTTAATCGATA  | 40143 | CGG | 222 | 11980 |
| AATCCCTCAATAACGCCACC  | 33096 | TGG | 222 | 146   |
| AAATGAAGCTGATTTAGATA  | 18759 | TGG | 220 | 11013 |
| ATAGAGGTGGTTAAATATGT  | 21707 | GGG | 220 | 7629  |
| ATCATCAACACTATTTCTAA  | 16631 | TGG | 217 | 3899  |
| ATTGAAGAAAGGTTATAACA  | 14105 | GGG | 213 | 9203  |
| TTTTCTAATTGTTCTCGAGT  | 22997 | TGG | 213 | 2278  |
| ACATTTAGTAAATCATTACG  | 39108 | AGG | 211 | 6081  |
| TCACGTTCAAATAATGATAC  | 20329 | TGG | 211 | 132   |
| TCAATTAGTTTGTCCGCCTA  | 5991  | TGG | 210 | 10442 |
| ATATCTGAATTGTTATCAGT  | 3651  | TGG | 210 | 1214  |
| CTATCTCGTAAGTTCAGCGT  | 11931 | TGG | 209 | 9164  |
| ATTCAACATTCAGTTAAAGA  | 11781 | AGG | 208 | 9714  |
| GGTAAACATCACGGAATGTT  | 22440 | TGG | 208 | 302   |
| TGGAGAAGAAAGCAAGTGCA  | 11496 | TGG | 206 | 9121  |
| CTAAAAATTAATTAAGGA    | 4603  | CGG | 206 | 534   |
| GAAGAAAAAGAAAAGTGAAA  | 9068  | TGG | 206 | 45    |
| GCTTTAATTCAGTTGCTTAC  | 25886 | TGG | 205 | 10840 |
| AGAATTGGTTAACACCTCTT  | 30867 | TGG | 203 | 8684  |
| ATTGAATTGCTATCATATTC  | 13883 | CGG | 203 | 264   |
| ATTAAGGCTTCAACACCATC  | 15672 | AGG | 202 | 10266 |
| TTCCCTCACACTATTTCTAT  | 20996 | TGG | 202 | 9682  |
| GAAAGAATGACGAGTTTTAA  | 12729 | TGG | 202 | 9340  |



|                       |           |     |       |
|-----------------------|-----------|-----|-------|
| GGTTTGTTAGTTATATAAAT  | 3630 TGG  | 202 | 204   |
| AAAACCAACGTTTAATGATT  | 4198 GGG  | 201 | 11318 |
| TATAAGTAATATTTTTCTTT  | 8609 CGG  | 201 | 10164 |
| TAAGAATGACATTGAAATAG  | 14833 AGG | 201 | 345   |
| TCTAAAAACCTAAGTCAAC   | 21416 AGG | 200 | 9574  |
| ATGGAAGAGAAAAATCTTG   | 19122 AGG | 198 | 44    |
| GTAAGATGACAGCTATGTTG  | 17376 AGG | 197 | 6177  |
| AAAAAGAAAAGTGAAATGGT  | 9072 TGG  | 196 | 9105  |
| GTATAACGGCAATGACACAG  | 11681 AGG | 196 | 3748  |
| AAGCCTGTAACACTTACATA  | 34774 AGG | 195 | 10916 |
| TATATTTGATTTGTAAGTTC  | 21725 AGG | 195 | 4149  |
| GACAAAGAAATGACGAAAGC  | 23187 AGG | 194 | 7995  |
| TATTAATAAAAAATGATA    | 39198 TGG | 192 | 5650  |
| TTAATAGGACGAGGTATAGA  | 15867 TGG | 192 | 2213  |
| GGCTTGAGAGAGCAAATAAA  | 13999 AGG | 190 | 4661  |
| TGAAGTACGACGAAAGTTAT  | 7640 TGG  | 189 | 7365  |
| TGAAATCCATACCAACCATC  | 38235 TGG | 189 | 7297  |
| TTCATCCGTTTAAATCAATA  | 20938 AGG | 189 | 5430  |
| CGCTAACATAAAGAACATAT  | 38272 TGG | 189 | 377   |
| CCATTCGGGTGTTTTTTAGT  | 7782 AGG  | 188 | 9469  |
| GCAATACATGCAATCAGTTT  | 25972 GGG | 188 | 1512  |
| GAAACAATCTTTATAAACGC  | 1308 AGG  | 187 | 9827  |
| GAATATAAGCAAACAAGCA   | 7862 CGG  | 187 | 9772  |
| CCTATTACAGATTCATCGTC  | 11132 TGG | 186 | 8380  |
| TACTTATTATTATGTATTTT  | 16889 AGG | 186 | 1569  |
| AGGAAATATCTCAGTTATTA  | 27513 AGG | 185 | 9841  |
| GATTCCAATACTACGTTAAT  | 1461 AGG  | 185 | 8989  |
| AGTTATTCAAAAATCACGAA  | 1154 AGG  | 185 | 656   |
| TTGAGTATTGCGAATCAAGT  | 12100 AGG | 185 | 617   |
| TTTACAACGCGCTAAATCAA  | 23758 TGG | 185 | 112   |
| AACTTATATCATTTCGTCATA | 3618 GGG  | 184 | 8497  |
| AATTGGCCACTGCTTTCAA   | 5117 TGG  | 184 | 8417  |
| TTGAAAATGATTTAGTTAGT  | 31919 GGG | 183 | 9227  |
| AAGAGAGTTATATAAAGCTT  | 1876 TGG  | 183 | 7527  |
| TGCGTCCTGCGTCAATTGCA  | 21646 GGG | 183 | 7438  |
| TTCCCTCACACTATTTCTAT  | 20996 TGG | 178 | 4332  |
| CACATTGACTTACTAGAAAA  | 5280 CGG  | 177 | 9113  |
| AGAGCATGGTCAGAACAAGT  | 25082 AGG | 177 | 575   |
| GTAAGAATTATCTTAAGACG  | 14303 TGG | 177 | 103   |
| GTTCAATATAAAACGAAAA   | 3300 CGG  | 175 | 10658 |
| GAAAGAATGACGAGTTTTAA  | 12729 TGG | 175 | 518   |
| AGATACCAGAAAGATAACGA  | 5214 CGG  | 173 | 7625  |
| ATACAAAAAAGAGCTGAAAA  | 7129 CGG  | 173 | 50    |
| ACGCAATTTTTTCGTACCTTC | 14720 CGG | 172 | 8212  |
| ATTTTCAGCATCTTTCGGTA  | 2681 TGG  | 172 | 35    |

|                       |       |     |     |      |
|-----------------------|-------|-----|-----|------|
| ATAGACAGGTTTACTAAGCA  | 22068 | TGG | 170 | 2367 |
| GAAATCCTATGCAAGGCAGT  | 331   | AGG | 170 | 67   |
| ACACCAGAAAACACATATAG  | 2830  | AGG | 169 | 9626 |
| TATAAGTAATATTTTTCTTT  | 8609  | CGG | 169 | 8353 |
| GCCAACAAAATAACATTAT   | 16754 | AGG | 168 | 6426 |
| AATACAAAATCTACGGCACA  | 32585 | TGG | 168 | 1159 |
| TACACAGTAGCTAATGTAA   | 39406 | AGG | 168 | 126  |
| TATATTTGATTTGTAAGTTC  | 21725 | AGG | 166 | 95   |
| AACCCTCTATCAACATAGCT  | 390   | TGG | 165 | 179  |
| ATAACTAGCTCAAAGCGTTA  | 9195  | TGG | 164 | 6708 |
| CCAATCGTATCAAGTACAT   | 25934 | TGG | 164 | 5353 |
| TTTGCCGATTAATTCCGCTC  | 26324 | CGG | 164 | 2751 |
| TTATCCACGAGTCATGCAAG  | 5782  | TGG | 164 | 53   |
| CAGTGCCTTGTAATATGATT  | 29157 | AGG | 163 | 9676 |
| GCTTCAATTCCTTTATCTCC  | 22331 | AGG | 163 | 4080 |
| TACTACAGTACCGTTTTTAC  | 36839 | CGG | 163 | 2769 |
| TTAGTTATAGTAACTTTGT   | 33295 | TGG | 162 | 8104 |
| TACTTACGTAATGCGAAAGG  | 679   | TGG | 162 | 6638 |
| TGGGTGTGCTTCGAATAGTT  | 25256 | TGG | 161 | 6497 |
| GTTAAAAGAATGTTAAAGTC  | 6108  | AGG | 160 | 5978 |
| ACGGAATACTAGAAGATGTT  | 20704 | AGG | 160 | 4960 |
| TAAAGACGATAGAGAGAGAA  | 16363 | TGG | 160 | 1473 |
| TTGAACGCTGCAGGAAGATT  | 24785 | TGG | 160 | 258  |
| ACTCCTAATCGTCATCTTGG  | 5896  | CGG | 160 | 63   |
| ACTAAAATTGATGTGCAGA   | 31426 | CGG | 159 | 7297 |
| CTCATCAATATCATTCTGAT  | 17679 | TGG | 159 | 6393 |
| TGCGCTTCAATAGTGATAGT  | 4339  | AGG | 159 | 4498 |
| CTGGCACATTATGAAGCAGT  | 5661  | CGG | 159 | 3645 |
| TATTGTTCATCGAGCTTAAAT | 15604 | TGG | 159 | 113  |
| TTTGATTACAATCCATTGTT  | 16958 | TGG | 158 | 9583 |
| GATAATTTTGTAATATTCTT  | 31243 | AGG | 158 | 7138 |
| GCCAACAAAATAACATTAT   | 16754 | AGG | 157 | 8228 |
| TGGAACCCTGCAATTGACGC  | 21657 | AGG | 156 | 6252 |
| GAATGATAACGATCTAATTC  | 19068 | AGG | 156 | 3709 |
| AGAACTGGAGAAATAACTTA  | 30344 | TGG | 155 | 7829 |
| TGGTAACTTTTATTTTATTG  | 15887 | AGG | 155 | 7653 |
| TTTGACACAACACAAACATC  | 27196 | AGG | 155 | 5377 |
| ACAGTATTAGACGCATGTAA  | 9138  | TGG | 155 | 1343 |
| AAGATTTTATTAAAGCAAGA  | 7445  | TGG | 154 | 3645 |
| TGCTTATCTGTCTTCGGAAT  | 5036  | AGG | 153 | 1930 |
| ATGAGAGCACGTAAAGACGA  | 18537 | TGG | 152 | 252  |
| AACAGCTGAATGGTTAAACA  | 7515  | CGG | 152 | 109  |
| ATCTCCAGCAAAGCAATCA   | 36028 | TGG | 152 | 42   |
| GATTTGATTACCTCTTACT   | 18020 | CGG | 151 | 6757 |
| GTATAACGGCAATGACACAG  | 11681 | AGG | 151 | 6369 |

|                       |       |     |     |      |
|-----------------------|-------|-----|-----|------|
| CACAAAGTAGTCAGCGCGGT  | 26390 | AGG | 151 | 3337 |
| AAGTTAAGAAGTAACGCGCT  | 19258 | AGG | 151 | 134  |
| CGATAGTAGACGCAATTAAT  | 31775 | GGG | 150 | 7237 |
| TTATCTGCATTAAAGCGTAA  | 17417 | AGG | 150 | 4153 |
| ATAATCCAACATCTCAAGAA  | 38028 | GGG | 149 | 2601 |
| AAACAATAAACTTTTATGG   | 11602 | AGG | 149 | 1695 |
| TAAAACCCCTAACCTTACT   | 6272  | AGG | 149 | 540  |
| ATTATTTTCAGTGTACTTTTT | 13049 | CGG | 149 | 363  |
| TCATAACTTTCAACGCTACC  | 32832 | TGG | 148 | 5413 |
| ATTGAACAAGCGCAAGCTAA  | 23405 | CGG | 147 | 192  |
| AATTTTCTAGTTGATTCTAC  | 5396  | TGG | 145 | 7483 |
| TACACAAAATACAAAATCTA  | 32578 | CGG | 145 | 518  |
| TCGGTTGATTCTATATCTAA  | 6310  | CGG | 144 | 8551 |
| GGAAGAAGCGAGTATCAATA  | 3735  | TGG | 144 | 616  |
| CTGGATAGACAAATGTCTAG  | 35618 | GGG | 144 | 65   |
| AGAAAAACAAAGATTTGTTT  | 6142  | CGG | 143 | 8395 |
| CAACGATATTTGATATTTAG  | 8824  | AGG | 143 | 6332 |
| TTCATACTACGCCAAATATT  | 35320 | AGG | 142 | 3348 |
| CGTTCATAGAACATACCTGA  | 15671 | TGG | 141 | 8142 |
| GTAAAAGCGTTAGTGGCATT  | 25184 | TGG | 141 | 6525 |
| TCTTTGCTTTATTATCAAAC  | 38333 | GGG | 141 | 1774 |
| GTTTACCCATATATTGTTGT  | 21840 | GGG | 141 | 1418 |
| ACACAAATCCATCAATTGTT  | 2890  | TGG | 140 | 7017 |
| CCACTCACGATAAGTCATGA  | 18560 | TGG | 139 | 6407 |
| TTTACTCAAGAAAAATGGAG  | 20639 | TGG | 138 | 35   |
| TGCTTGTAACGTCGTTAACG  | 20288 | TGG | 137 | 6429 |
| TTAACCAAGCAATAGATGAA  | 3515  | TGG | 137 | 3224 |
| TCTAACTTACAGATGATTA   | 32287 | CGG | 137 | 3140 |
| TTGAACAAAGGTTATATAGT  | 12992 | TGG | 136 | 2321 |
| GATTACTTACGTAATGCGAA  | 676   | AGG | 136 | 63   |
| AGCAATTCAATTGCACAGTA  | 13911 | TGG | 136 | 35   |
| AAACGAAGGAGTGTATTTAA  | 22130 | TGG | 134 | 7363 |
| TATTGGTAAGTTTTGTCACT  | 4934  | TGG | 134 | 6951 |
| TATATTGGGTTAAATCACAG  | 38948 | GGG | 134 | 6395 |
| AATTTAAGTTTATTGATGAT  | 15922 | TGG | 134 | 4421 |
| AAACAACAACGAAATATATG  | 11087 | CGG | 134 | 3997 |
| AGTTGTCTATAAATATGAGG  | 11843 | AGG | 134 | 320  |
| ACATCAATCACACATTCGGA  | 2429  | CGG | 133 | 7740 |
| GCATAAAAAATGGTATTAGG  | 3051  | AGG | 133 | 142  |
| TCAGATACACAACCTATGCA  | 30587 | AGG | 132 | 1976 |
| AAAATTATTACAAACAGAAT  | 5429  | TGG | 132 | 809  |
| TCTATCAATAAATTGTCCGT  | 30182 | TGG | 130 | 6556 |
| TCCTGCCGTTAAATATAGAG  | 6373  | CGG | 130 | 61   |
| TAACGAAATAGTATTTGTTT  | 12907 | TGG | 129 | 5456 |
| ATTAATATAGATAATTATCG  | 34463 | GGG | 129 | 3542 |

|                        |       |     |     |      |
|------------------------|-------|-----|-----|------|
| CAAGATGGAATCAAGATTTT   | 7460  | AGG | 129 | 3453 |
| AGGAAATATCTCAGTTATTA   | 27513 | AGG | 128 | 5448 |
| TTTATCTTTTCGCTGAATAG   | 7668  | TGG | 128 | 58   |
| TGCTATGCATGCTGTA AAAAG | 5932  | TGG | 127 | 6756 |
| ACTAAAATGTGGCAAATTGA   | 36893 | TGG | 127 | 4341 |
| AATACTCCACTAATGTAATC   | 20876 | AGG | 126 | 5607 |
| TTGTTGAATTACCTTTAACA   | 32234 | AGG | 125 | 4219 |
| TTCTTTACTTCGTATAAGAT   | 13599 | CGG | 125 | 158  |
| TGATGAATTAGCTGACATGT   | 12069 | TGG | 125 | 36   |
| TTACAACATCGTCGATAATA   | 36441 | AGG | 124 | 5154 |
| TAGTATTAGGAGACTTTACA   | 28698 | AGG | 124 | 1894 |
| TGCATTACTGCATTTGTATA   | 30073 | TGG | 124 | 111  |
| TGATGAATTAGCTGACATGT   | 12069 | TGG | 123 | 4130 |
| ATAAAAGTAAATGTTGATAC   | 18643 | TGG | 122 | 287  |
| AAAGCGTAAAGGGTACA ACT  | 17428 | TGG | 122 | 73   |
| AATCACGGAGCAAAGCGTAC   | 15147 | AGG | 122 | 31   |
| TTATTTCTCCAGTTCTATAT   | 30321 | TGG | 121 | 4885 |
| CAAAAGCAGTCAAAGCTAAA   | 8093  | GGG | 121 | 638  |
| TAACAACTAGTTGATGATA    | 21791 | GGG | 121 | 30   |
| CCAAATATCTGACCAATCTT   | 24949 | AGG | 120 | 5768 |
| GGTTCCTGTAAATTATTTTC   | 6619  | AGG | 120 | 2738 |
| TACCCATACCGCGTAACACA   | 17082 | AGG | 120 | 1635 |
| CATATTATATCGAGTCAAGG   | 12415 | AGG | 120 | 1420 |
| ACAAGAGTGCCGATTTACC    | 32830 | AGG | 120 | 1356 |
| TCTTATCTGAAGTATCTATG   | 24655 | TGG | 119 | 6766 |
| TTTGTCTATCCAGTGCTTGC   | 35592 | TGG | 118 | 5281 |
| ATGATGATGTGTATGTTACA   | 17827 | TGG | 118 | 1816 |
| TTTTCTAATTGTTCTCGAGT   | 22997 | TGG | 118 | 1041 |
| CCTACTATTATGCAGTTAAT   | 25154 | CGG | 117 | 5819 |
| GTTTGATGTTCCGAGTAAAG   | 18026 | AGG | 116 | 3120 |
| ACA ACTTCACGACGCAATAA  | 15028 | CGG | 115 | 5538 |
| GAAAATCCGGAGCTATCACA   | 10379 | AGG | 115 | 164  |
| TCATGTTCCGGTAAATTTATA  | 9457  | TGG | 114 | 5319 |
| AAAGCAATACGTGATGATGT   | 18192 | CGG | 113 | 6324 |
| TAATTAAGTAAAGTGATTA    | 37371 | GGG | 113 | 42   |
| ACAATAGAAAATGTACGTAG   | 37630 | CGG | 112 | 5168 |
| ATTTATTA AACCTTACAAAA  | 5009  | AGG | 112 | 4572 |
| CGACTAAAGGAGGCAACCAA   | 29611 | TGG | 112 | 2098 |
| TAATACACTTTACTTAATTA   | 37390 | AGG | 112 | 790  |
| GTAAGATGACAGCTATGTTG   | 17376 | AGG | 112 | 760  |
| TCAACAACCAATGCTCGGGA   | 15535 | TGG | 112 | 210  |
| ACAATAGAAAATGTACGTAG   | 37630 | CGG | 112 | 56   |
| ATTTAAGTTTATTGATGATT   | 15923 | GGG | 110 | 5702 |
| TTCAGGCAAGGTGCATGCTC   | 31836 | AGG | 110 | 5510 |
| TATATGTATCGAGTGATGAC   | 40072 | AGG | 110 | 4984 |

|                       |       |     |     |      |
|-----------------------|-------|-----|-----|------|
| CTAAAAATTGATGTGCAGAC  | 31425 | GGG | 110 | 4906 |
| TCTAAATTCAGTGATGTATT  | 15995 | AGG | 110 | 4509 |
| TACTTTGTTAACAAGTTTTT  | 2501  | AGG | 110 | 614  |
| AAGCAACGTGATGAGCTTAT  | 11438 | TGG | 109 | 98   |
| TCCTTAGTTGATAGATTTTT  | 19309 | AGG | 109 | 87   |
| CTCGCCATTTTCATATAAATA | 17971 | AGG | 109 | 39   |
| CATATAAATAAAGGCTCATA  | 17962 | AGG | 108 | 4427 |
| TGAAAGAGTTAAATTTGGAA  | 11575 | TGG | 108 | 3375 |
| TTGCTTACTGGCGACTTCTC  | 25898 | AGG | 107 | 5878 |
| AATGAAGTTTATTTCGCTCAC | 8700  | AGG | 107 | 4104 |
| TAAAACTTTCGTTATACTCT  | 28014 | TGG | 107 | 3299 |
| ATTTTTAAAACATTCAGGCA  | 31824 | AGG | 107 | 54   |
| TTCTTAGAGTTATTGAAGAA  | 14094 | AGG | 106 | 5016 |
| TAAAACTTTCGTTATACTCT  | 28014 | TGG | 106 | 4855 |
| TACTTATTATTATGTATTTT  | 16889 | AGG | 106 | 2818 |
| TATAATTCATTCATGTTATT  | 15351 | TGG | 106 | 2289 |
| TCATCAACACCATCTTGTC   | 32421 | AGG | 106 | 571  |
| ATTTAAAGTCAAGAAGTATG  | 20839 | GGG | 105 | 5100 |
| GGCTTTTTAGATACAGAAGA  | 19045 | AGG | 105 | 40   |
| GGCAAAGATGAAAAGTCAC   | 33878 | AGG | 104 | 4391 |
| GGCAATGTGTTTCGCTGGTAT | 24986 | TGG | 104 | 3489 |
| ATAATACTGCTCGTGCAACA  | 32531 | TGG | 104 | 2056 |
| TATGCACTTTTCGGACTGTT  | 18886 | AGG | 104 | 49   |
| ATCTTCGCGCAACAGGTCAA  | 24275 | AGG | 103 | 55   |
| TTTACCTTAATATCTTCTGC  | 20457 | AGG | 102 | 5012 |
| ACAGCAATAGAGTACGTACA  | 7990  | AGG | 102 | 4900 |
| GTTGTTTGAAATGTACGAGA  | 10552 | TGG | 102 | 4166 |
| GTGTATATTTGCCAATTGTC  | 7002  | AGG | 102 | 1417 |
| CGTTACGAAATAAGAGAACC  | 23483 | TGG | 101 | 5066 |
| CATTGATACCGTCGCCGTTA  | 29850 | TGG | 101 | 5039 |
| CTGTCTATAGAAGTACTTAC  | 26569 | AGG | 101 | 4493 |
| TGCCAAGGAAATCCTATGCA  | 338   | AGG | 101 | 44   |
| AATTAACACTACCCACCATAT | 14403 | AGG | 100 | 5326 |
| TGAATTTTACAGTCCTATGA  | 13169 | TGG | 100 | 5089 |
| TGAACAAAGGTTATATAGTT  | 12993 | GGG | 100 | 4588 |
| GACGGTAAACATACCTATAG  | 27571 | AGG | 100 | 4241 |
| AAACGAAGGAGTGATTTAAA  | 22130 | TGG | 100 | 687  |
| TTGGTATCAAATCTAAGCT   | 4889  | AGG | 99  | 5142 |
| TTCTTAAGTTGTCTTTCAGT  | 30454 | GGG | 99  | 4548 |
| AAGAGAACGCAACAAAGAGC  | 11476 | TGG | 99  | 3042 |
| CTCTATTATCTCTTCGTACA  | 18682 | AGG | 98  | 5299 |
| GGTAAATCCTAGAATTGTTA  | 27993 | AGG | 98  | 5052 |
| TAAACCGCTCTATATTTAA   | 6384  | CGG | 98  | 54   |
| TCACAGTAAAGTAAGTGGTA  | 15396 | AGG | 98  | 40   |
| AAAAAGCTGAAGAAAATAAC  | 5074  | GGG | 97  | 4608 |

|                       |       |     |    |      |
|-----------------------|-------|-----|----|------|
| CAGTTTTAATACCGTATTCG  | 10810 | TGG | 97 | 2977 |
| ATAATAAAATTATAACCAGAA | 6865  | AGG | 97 | 55   |
| TTCCTAAAAGCTGGATTGTA  | 29485 | TGG | 96 | 2527 |
| CCAAAATCATTAAATATTGCA | 8029  | AGG | 95 | 5144 |
| ACTTGTTCTTTATGATAATA  | 16121 | TGG | 95 | 2563 |
| ATTCATCAATTGTTTTTCT   | 4834  | TGG | 95 | 204  |
| GCGATGTCAGCAGGTATCAG  | 24599 | AGG | 94 | 4113 |
| CAAGATGGAACAGCAGACGC  | 12373 | AGG | 94 | 2876 |
| TATAGTTGGGATCAATGTTG  | 13006 | AGG | 94 | 2750 |
| TAATTATTTCAACAAATGAA  | 6470  | TGG | 94 | 113  |
| GTAGTTAAACATATGAATGA  | 7048  | TGG | 93 | 6310 |
| TTTGTAACAACCTGATATTA  | 21    | AGG | 93 | 4404 |
| ACTAAAATTGATGTGCAGA   | 31426 | CGG | 93 | 3153 |
| AATACTCCACTAATGTAATC  | 20876 | AGG | 93 | 62   |
| AAACTTACCAATAAGATCAT  | 4908  | TGG | 92 | 4542 |
| AGATGAAAAAACGACTATAA  | 165   | AGG | 92 | 2767 |
| TAAAAGGTATCTACTTCACA  | 36195 | AGG | 92 | 472  |
| TTTCTGTTCAATTTAGAGTT  | 14132 | AGG | 92 | 315  |
| ATTAACGAATGAACTCAAT   | 18056 | AGG | 91 | 3304 |
| AAAATAATAGCATCATCTA   | 6502  | TGG | 91 | 1377 |
| GTGCAACACTTATTTGTATT  | 10435 | TGG | 90 | 3693 |
| CTATCCGGATATTTATTTTT  | 37527 | AGG | 90 | 3136 |
| CATGACCTGTAATAACAAAG  | 4272  | TGG | 90 | 209  |
| TCTGATATAGAGGGTATTGA  | 26899 | TGG | 90 | 49   |
| GGTCTTGTAATTATTTTC    | 6619  | AGG | 90 | 48   |
| AATCATCAATAAACTTAAAT  | 15904 | TGG | 89 | 5306 |
| CACAACGAGCAACATGCGAT  | 5751  | TGG | 89 | 3764 |
| GTAAGTCGTAAGGTACATAT  | 21141 | AGG | 88 | 3809 |
| GGATATCGAAAAAGAAGCGC  | 9340  | TGG | 88 | 218  |
| CGGAAAGCCTCACGCAGACC  | 5642  | TGG | 88 | 88   |
| CGGATTGTTCTATTTGTTCA  | 11626 | CGG | 87 | 4032 |
| AGAGAACTTGTATTGAACAA  | 12980 | AGG | 87 | 3682 |
| TTTTAAAAATCGGAAGGTTT  | 14717 | CGG | 87 | 3667 |
| ATACTTGATAAGTCTACTAT  | 27938 | TGG | 87 | 120  |
| CTGAATGGGTTTCTAACATT  | 26193 | TGG | 86 | 3692 |
| ATTTCAAGGAGCGAGATGCA  | 8432  | TGG | 86 | 3197 |
| GAATCATTTAAATTAACAAT  | 22317 | TGG | 86 | 38   |
| TTTTATATGAGCAAGAGCTA  | 8794  | GGG | 85 | 3896 |
| CTTGATGTACTTCTTTGTGT  | 13373 | TGG | 85 | 797  |
| AAATGAAGCTGATTTAGATA  | 18759 | TGG | 85 | 49   |
| ATTGGAAGTATCAAAAAGT   | 21014 | AGG | 84 | 5141 |
| AGAGAACTTGTATTGAACAA  | 12980 | AGG | 84 | 1823 |
| ATTCATTTTAAAAGGTCATA  | 3399  | TGG | 84 | 203  |
| CTTTGAATGGTTTAATACAT  | 11994 | TGG | 84 | 170  |
| TATCAAAAGAGTTTCTTAAA  | 19824 | TGG | 83 | 4858 |

|                       |       |     |    |      |
|-----------------------|-------|-----|----|------|
| TTAGCAAATAGTTGTTCTAT  | 17735 | TGG | 83 | 4517 |
| TCTAGAGCACCGTTAAAGAA  | 9976  | TGG | 83 | 4451 |
| CGTATATTTCTTCTTTTTGA  | 29736 | TGG | 83 | 3896 |
| AAAATTTAAACTATTTTCAGG | 12663 | TGG | 83 | 3781 |
| CATATCGTACCAGATTGGCA  | 10188 | AGG | 83 | 3425 |
| ACACTGCTAACAGCTGCAAT  | 25342 | CGG | 83 | 1140 |
| GTAGTTGAATATAACGTTAC  | 26854 | AGG | 83 | 82   |
| GAGAAAACATGTTGTTAAGT  | 23959 | TGG | 83 | 75   |
| GTTTGAAGATGAAGAAACGT  | 18313 | TGG | 82 | 4561 |
| GGCGTTCAAGTGGTTCAGAC  | 15372 | AGG | 82 | 4549 |
| AAAAAGTAGAGCTTAAGATA  | 26954 | AGG | 82 | 217  |
| TTTAACCTAATAAAAATACAT | 38598 | TGG | 82 | 116  |
| CTATATGTGTTTTCTGGTGT  | 2811  | TGG | 82 | 71   |
| TGCTCATACTTTGCGTTATC  | 35380 | CGG | 82 | 35   |
| AATTTAAGTTTATTGATGAT  | 15922 | TGG | 81 | 4441 |
| GCTGATAAAAGTAAACTATC  | 16059 | GGG | 81 | 3567 |
| GAATCAAGATTTTAGGTTGG  | 7467  | AGG | 81 | 3411 |
| CTTAATGTGTTTCATAGATTC | 37069 | AGG | 81 | 2672 |
| AAAAGAATTTGATGACGTGT  | 16202 | TGG | 81 | 2319 |
| ACATTATGAAGCAGTCGGCA  | 5667  | AGG | 81 | 1877 |
| ATATCACTGTTCCCTATGGCT | 25812 | TGG | 80 | 3837 |
| GTATTGTTGTACCACTCATA  | 29337 | GGG | 80 | 3113 |
| CCATTTGTTATCTCCTTTC   | 6863  | TGG | 80 | 2449 |
| ACACATTGTACCGAATTAGA  | 36096 | TGG | 80 | 1802 |
| ATTTGAATCATCACATTTAT  | 11324 | TGG | 80 | 80   |
| AAACAACAACGAAATATATG  | 11087 | CGG | 79 | 3839 |
| CTAATAAAAATGATATGGAT  | 39203 | TGG | 79 | 2387 |
| ATCAAATCAATTGGAACGAT  | 28973 | TGG | 79 | 680  |
| TAATAAACTTTAGAACAAAC  | 27615 | CGG | 78 | 4535 |
| GCATTCTCGCTAGTTTAGA   | 14879 | TGG | 78 | 3412 |
| TATGCACATACCAATGTTGA  | 8130  | TGG | 78 | 3247 |
| ACGTAACGCTACAAAGTCTA  | 28520 | AGG | 78 | 1726 |
| GTTACTATAACTAAAATTAT  | 33319 | GGG | 78 | 1490 |
| TTAATTTTTAATGTTGTAAT  | 22772 | TGG | 77 | 3850 |
| CGCTCTTATCAGACGTAGTA  | 20564 | CGG | 77 | 3442 |
| TTAAAAGAATAGCATCATTT  | 6437  | GGG | 77 | 3408 |
| ACTTTAAATATTTTCGATGGT | 21466 | GGG | 76 | 4089 |
| CAACCAGCACATTACACATA  | 9862  | CGG | 76 | 3733 |
| TAGCGTCCATTACACCTAGT  | 11361 | TGG | 76 | 3537 |
| TTTACACCAATAAATAGCTT  | 18425 | GGG | 76 | 2560 |
| ATATTGGGGTTTTGTAACAT  | 34525 | GGG | 76 | 2108 |
| CAAGATGGAACAGCAGACGC  | 12373 | AGG | 76 | 970  |
| CCAAAATCATTAAATATTGCA | 8029  | AGG | 76 | 37   |
| AAAAAGATTATGGCTTATAT  | 38933 | TGG | 75 | 4474 |
| CTTAAATACTTAGCGATATT  | 38802 | AGG | 75 | 981  |

|                       |           |    |      |
|-----------------------|-----------|----|------|
| TCAAAGTGATGTGTTAGCTA  | 4405 GGG  | 75 | 399  |
| TAATAGAACTATCAAGTAAA  | 556 AGG   | 75 | 47   |
| GTATCAAATGGATATACCTA  | 30556 TGG | 74 | 4270 |
| TTAAATCTGACGCACTTTGT  | 33535 TGG | 74 | 3972 |
| GCTAAGTATTTAAGACATGC  | 38827 AGG | 74 | 2232 |
| TCGCCTCTATATGTGTTTTTC | 2817 TGG  | 73 | 3080 |
| CGTGTGGCTCGTAAAGAAGC  | 18237 AGG | 73 | 2251 |
| CATAGAGGTGGTTAAATATG  | 21706 TGG | 73 | 133  |
| GATTGGGATTACGCACGTTA  | 20243 CGG | 73 | 116  |
| CCAGCAAAAGCAATCATGGG  | 36032 CGG | 72 | 2928 |
| ATTGGTCGACGTTTGAATAT  | 16411 TGG | 72 | 1682 |
| TGTATTAGCTGATGTAATAC  | 13880 CGG | 71 | 4364 |
| AAAAAGATTATGGCTTATAT  | 38933 TGG | 71 | 3120 |
| TTACTATAACTAAAATTATG  | 33320 GGG | 71 | 2936 |
| GCCAATGACTCAACAATTAC  | 34880 TGG | 71 | 928  |
| AACAATTTATTTGAGTATGA  | 21191 GGG | 71 | 330  |
| TGAACGACACAAATGATTTA  | 38151 GGG | 70 | 3490 |
| TACTCATCGTTTGAATCGTC  | 32541 TGG | 70 | 3305 |
| GATTCTTCTAACTTATTAAC  | 17482 TGG | 70 | 3140 |
| AAGATTTAAATGTAGATAAC  | 39754 AGG | 70 | 2888 |
| CCAGACGATGAATCTGTAAT  | 11148 AGG | 70 | 2675 |
| GTTTAAGATATAGAATGCTT  | 10634 TGG | 70 | 1942 |
| ATAAGAAACATCAAATCAAT  | 28964 TGG | 70 | 1307 |
| CGGATTCCTTATTAACGCA   | 2344 AGG  | 70 | 158  |
| TCGCCGTATGTGTAATGTGC  | 9849 TGG  | 69 | 2156 |
| TATGCAATATACGTTGAATA  | 21519 CGG | 69 | 1369 |
| TTTACTCAAGAAAAATGGAG  | 20639 TGG | 69 | 796  |
| CATTCGAAAGGATTAGAATC  | 19103 TGG | 68 | 4251 |
| AGCTAGTTATTTCTGTAATT  | 9166 TGG  | 68 | 4111 |
| CGATTGTACTTGCTTGATGT  | 36132 TGG | 68 | 3735 |
| CCTGGTGCAAAAGGTGAAGC  | 36809 AGG | 68 | 3329 |
| TTATTTGCTAATAGTTTGTT  | 2738 CGG  | 68 | 3202 |
| TGATTGGTTACACGGTTATT  | 29200 GGG | 68 | 2140 |
| ATCGGTGTTATCGGTATTTT  | 25310 AGG | 68 | 184  |
| GTACTIONCTGGACACTATAA | 31097 TGG | 68 | 67   |
| GGTATATATGCTACTGGTCC  | 21546 TGG | 67 | 2791 |
| GACTIONTATTACAGTCTTGT | 20536 CGG | 67 | 2689 |
| TTAGAATTGACACCTCAAGA  | 873 AGG   | 67 | 2651 |
| AGCAACTAACTTTATTTTAG  | 10288 AGG | 67 | 2587 |
| CTTATCAAATACCGTGTCTT  | 10514 TGG | 67 | 57   |
| GATGAACGCTCAGATATTCA  | 35012 AGG | 66 | 2553 |
| GAGGAGGTAGAACATGACTG  | 3805 AGG  | 66 | 568  |
| CGCTCAGAAACTCATAGATG  | 8501 AGG  | 66 | 157  |
| GATGATTATAACGTAGATAG  | 31729 AGG | 65 | 3389 |
| CTCCGCCAAGATGACGATT   | 5883 AGG  | 65 | 3013 |



|                        |       |     |    |      |
|------------------------|-------|-----|----|------|
| TGAATATGCACAAGCAGAAA   | 19771 | TGG | 65 | 2661 |
| TCAGATACATGGCCTCTGCC   | 40024 | CGG | 65 | 858  |
| CTGAATTCAATAAATAACAAC  | 17851 | AGG | 65 | 76   |
| GAATGTTGTCAAAAAGAATAC  | 25411 | TGG | 65 | 27   |
| GCGAGAAAAGTAAGAGTAAT   | 8404  | CGG | 64 | 410  |
| TTAATTAAGTAAAGTGTATT   | 37372 | AGG | 64 | 271  |
| TTAGAGAAGCCTGGACAAGA   | 32428 | TGG | 63 | 2311 |
| GTGTGATATGCGTCAAACAC   | 29449 | TGG | 63 | 1312 |
| GATACAAAGACTTACTTTAT   | 10714 | AGG | 63 | 781  |
| ACCACTAACTTACCTAAGAT   | 24953 | TGG | 63 | 119  |
| TTTAATTCTGACGAGTTTAA   | 17285 | CGG | 61 | 4021 |
| TTAGGTAAAACATCAGGTTC   | 33280 | TGG | 61 | 2398 |
| AAAGTAAAAGTTAAGACGAT   | 13564 | TGG | 61 | 335  |
| GATCCTGGAGCAGTAGGAAA   | 38758 | CGG | 60 | 2997 |
| GCCGTTATTACAAGGGGCTT   | 23075 | TGG | 60 | 2189 |
| GGATTAATATAGATAATTAT   | 34461 | CGG | 60 | 2061 |
| TGGTTCTTTGATGTACTGCC   | 31085 | TGG | 60 | 471  |
| AACAGAATGAACTATGAAAC   | 11351 | AGG | 60 | 85   |
| GGATTCTGAAATAGGTAAAA   | 16672 | TGG | 60 | 63   |
| GAAAACCTGTGATTAGTAGC   | 2640  | AGG | 59 | 3051 |
| TAGCACTAACACCTGCTGAA   | 23328 | TGG | 59 | 2782 |
| TTAGCTATTGGTAAGTCGTA   | 21151 | AGG | 59 | 2371 |
| GTTGATTCTTCTATGCTATC   | 37542 | CGG | 59 | 2216 |
| AATGGCAGTTGTGACGTGGA   | 2593  | AGG | 59 | 1809 |
| CTCAAAGTGATGTGTTAGCT   | 4404  | AGG | 59 | 1445 |
| TTAAATATAACATTGAATCC   | 22901 | TGG | 59 | 927  |
| AATCATAAAGCGTATATACA   | 8967  | AGG | 59 | 879  |
| ACATACTTTTTGATTGAGTA   | 20756 | AGG | 58 | 3341 |
| GATTTGGGATATTTAACTGC   | 32794 | TGG | 58 | 3062 |
| GTCCGCAAACGCCGTTAT     | 31227 | TGG | 58 | 2437 |
| GAAACGTTGAGGCACCTAT    | 8877  | GGG | 58 | 2137 |
| AATACACTTTACTTAATTAA   | 37391 | GGG | 58 | 1163 |
| AGAACTGGAGAAATAACTTA   | 30344 | TGG | 58 | 35   |
| AACTATCATTTAAAAGTTAAA  | 22519 | TGG | 57 | 3270 |
| GAGTGGGCAAAGTCGAATAT   | 34433 | TGG | 57 | 1772 |
| CGTACTTAACTTTTGCCATA   | 21277 | TGG | 56 | 3490 |
| TGGTTTATGTTAATTAATCA   | 15132 | CGG | 56 | 2831 |
| CAGTATCCCTGATATAGAC    | 22054 | AGG | 56 | 348  |
| ACACAAATCCATCAATTGTT   | 2890  | TGG | 56 | 228  |
| AACAATACGCCGTAAAGACA   | 29368 | CGG | 56 | 206  |
| GTTTATCCTACTGCCTTGCA   | 342   | AGG | 56 | 132  |
| AAAATTA AAACTATTT CAGG | 12663 | TGG | 55 | 2288 |
| GCAGCTTCAAACCACTCTTT   | 22556 | CGG | 55 | 1895 |
| ACACGTGTTGGTTATTTACA   | 16550 | TGG | 55 | 1225 |
| TACAAGTGACTTACAAGTA    | 1966  | CGG | 55 | 130  |

|                        |       |     |    |      |
|------------------------|-------|-----|----|------|
| TCATTTGGTCAAACTGGAA    | 38512 | CGG | 55 | 59   |
| TAACGATGTGTA CTTTGATT  | 33262 | AGG | 54 | 3276 |
| GAATGTTTTAAAAATTCATT   | 31800 | CGG | 54 | 2658 |
| CAAGATACTATCGAAGCTGT   | 31981 | CGG | 54 | 2504 |
| ACGTCATCAAATTCTTTTAT   | 16181 | AGG | 54 | 2297 |
| CCTTTTGCA C CAGGTTGTCC | 36784 | CGG | 54 | 1305 |
| CTTGTTTCAGTAACGATGCT   | 35557 | TGG | 54 | 195  |
| TCAAAGTATGGTGGCGGAGC   | 38446 | TGG | 54 | 123  |
| AATTATTCAATGGTCAATGT   | 37782 | CGG | 53 | 2462 |
| TTCTATGAACGTAATATCAA   | 15699 | CGG | 53 | 2263 |
| CTCGCCATTTTCATATAAATA  | 17971 | AGG | 53 | 1721 |
| TAATTTATACGTAGACCTTT   | 20017 | CGG | 53 | 129  |
| ACAAAGCGTTCCTGTATAAT   | 21028 | TGG | 53 | 92   |
| CATTCATGACTTATCGTGAG   | 18577 | TGG | 52 | 2234 |
| GTGCCAAACTGCGATGTCTC   | 34612 | AGG | 52 | 1164 |
| TTTGTCTATCCAGTGCTTGC   | 35592 | TGG | 52 | 1011 |
| TGTA CTTGTTTTTCATTTTG  | 7941  | TGG | 52 | 247  |
| GTTAAAGCTAATGATAAGGA   | 27469 | TGG | 52 | 34   |
| ATCACCATAACCTTTAATAA   | 28319 | AGG | 51 | 2272 |
| CTTTATACTCGTAACCATTC   | 7796  | GGG | 51 | 1516 |
| GGCAAAGATGAAAAGTCAC    | 33878 | AGG | 51 | 1339 |
| ATACTGCTTGACTATCGATA   | 22021 | CGG | 51 | 168  |
| TACGATTAAGCAGATGAAC    | 15776 | TGG | 51 | 127  |
| CGTACTTAACTTTTGCCATA   | 21277 | TGG | 51 | 124  |
| GATGGACGACA C TTTTGT   | 27154 | AGG | 51 | 101  |
| CACAAATAGAAATAGAGCTA   | 3699  | GGG | 51 | 39   |
| GCGCGCTCTAGATTTAACTT   | 8981  | AGG | 50 | 2543 |
| ATAGCGCAGACATACAAGCT   | 13526 | AGG | 50 | 2218 |
| TTTGAAATGTACGAGATGGA   | 10556 | AGG | 50 | 2079 |
| ACTGCAACTACTGCTAATAT   | 25492 | TGG | 50 | 2015 |
| TCAACTTTAGTAATCCTTCA   | 37736 | GGG | 50 | 2009 |
| AAAATCCGGAGCTATCACAA   | 10380 | GGG | 50 | 1355 |
| GCACGTTGCATAATCATTTC   | 2116  | TGG | 50 | 230  |
| ATTA AAAAGATTTTATGTTTG | 11219 | AGG | 50 | 149  |
| TTAAGTACTGCCATTATTGC   | 24334 | AGG | 50 | 118  |
| GCCTAAAAATCTATCAACTA   | 19294 | AGG | 50 | 86   |
| ATACTAAACCTGAACGATTA   | 16252 | AGG | 50 | 50   |
| ATATCGCTGAGAAAAATAAA   | 3882  | AGG | 49 | 2526 |
| TCAAAGTATGGTGGCGGAGC   | 38446 | TGG | 49 | 2257 |
| GCGATCAGTTAAAAACTACA   | 24537 | TGG | 49 | 2158 |
| CTTTTGCGATAGCGTATGCT   | 8060  | AGG | 49 | 1687 |
| AGAAAAATCGCCATCAATTC   | 454   | AGG | 49 | 465  |
| TGTA CTTGTTTTTCATTTTG  | 7941  | TGG | 49 | 452  |
| ATTTGCTATCCTTGAATTGA   | 461   | TGG | 49 | 138  |
| ACTACAGCATGGTCAATTGC   | 3165  | GGG | 49 | 69   |

|                        |       |     |    |      |
|------------------------|-------|-----|----|------|
| ACAATAACAGAAGCTTGGAA   | 25592 | CGG | 49 | 14   |
| ACGACATAAGCATGTTTAAT   | 3441  | TGG | 48 | 2711 |
| AACAATACGCCGTAAAGACA   | 29368 | CGG | 48 | 1791 |
| AAAAAGCGCATCTCAACCGA   | 37312 | CGG | 48 | 644  |
| CAGTGCCTTGTAATATGATT   | 29157 | AGG | 48 | 171  |
| ACAGTTCTAACATTTTTGAC   | 25035 | TGG | 47 | 2036 |
| CGACTAAAGGAGGCAACCAA   | 29611 | TGG | 47 | 1012 |
| TTATTTTCAAGTGTACTTTTTT | 13048 | GGG | 47 | 131  |
| TCTGATATAGAGGGTATTGA   | 26899 | TGG | 47 | 56   |
| GAACCACAATTTTCTCTTCT   | 6585  | AGG | 47 | 52   |
| CGTATTGATAATACAGGTTA   | 29903 | TGG | 47 | 37   |
| GAACCACAATTTTCTCTTCT   | 6585  | AGG | 46 | 1935 |
| TGAAAAAGGGCAAACGCTTG   | 40267 | TGG | 46 | 1843 |
| TCCGTTTTATCAGTGCCTAT   | 29215 | CGG | 46 | 1818 |
| TAAACTTAAATCTTTATATA   | 15068 | CGG | 46 | 1712 |
| ACGCTTGTGGAAAAGCTAAA   | 40280 | AGG | 46 | 1535 |
| AAAGATATTGTAAGTAGATA   | 15957 | TGG | 46 | 1412 |
| AGTGTATAACCTGCTGGCAC   | 39327 | TGG | 46 | 999  |
| TAAAAGAATAGCATCATTTG   | 6438  | GGG | 46 | 104  |
| TTTGCCGATTAATTCCGCTC   | 26324 | CGG | 45 | 2307 |
| CCACAATTAGCATTTGCAAT   | 9934  | AGG | 45 | 2289 |
| CAAATAGATAAAGGTGACAG   | 14987 | TGG | 45 | 2137 |
| AGAGCATGGTCAGAACAAGT   | 25082 | AGG | 45 | 2123 |
| AAATTACCTGACATAGATGA   | 17645 | AGG | 45 | 2042 |
| TAGGAGTGAACATATAGCC    | 40022 | GGG | 45 | 1801 |
| CGATTCAAGGTGTAGTAGAT   | 25638 | TGG | 45 | 1498 |
| TGCAGTAATGCAATCATTTT   | 30100 | GGG | 45 | 1453 |
| TATCTGTCGTTAAATATATT   | 30373 | CGG | 45 | 1388 |
| AAGTCACGTTGTAGTGGAAC   | 15498 | TGG | 45 | 1199 |
| GGAGACCTAATCATATTACA   | 29168 | AGG | 45 | 546  |
| AACTTTGAAGCTTCTAGAGC   | 6577  | AGG | 45 | 159  |
| AAAAACCAACGTTTAATGAT   | 4197  | TGG | 45 | 85   |
| AAAAACAACAACCTTAATAG   | 2527  | AGG | 45 | 60   |
| TTAATAATTGTCTTTGATCT   | 23367 | AGG | 44 | 2570 |
| TTCAGTGATTTCTTAAATGC   | 26321 | CGG | 44 | 1563 |
| TATCTGCATTAAAGCGTAAA   | 17418 | GGG | 44 | 1533 |
| TAAATGGAACAAGTGATATT   | 24174 | TGG | 44 | 1420 |
| GTTGATTTTCGTGCCACTGTG  | 994   | CGG | 44 | 585  |
| TTATCTAAAGGGACTTAAGA   | 19002 | CGG | 43 | 2721 |
| TTTCAATGTTTGGTACAAGT   | 26037 | TGG | 43 | 2260 |
| AAGATAACTTGCCGAAAGAG   | 22561 | TGG | 43 | 2259 |
| AAAAAGAAAAGTGAAATGGT   | 9072  | TGG | 43 | 1685 |
| AGCTTTAGTTGCATTATATT   | 23906 | TGG | 43 | 1574 |
| GCATTGATACCAGTGATTGC   | 24320 | CGG | 43 | 1077 |
| TAAAGACGATAGAGAGAGAA   | 16363 | TGG | 43 | 363  |

|                       |       |     |    |      |
|-----------------------|-------|-----|----|------|
| CTTGATTAAGCAAGGTATAC  | 35377 | CGG | 43 | 227  |
| GACCAAGATTTAGCGTTTTA  | 5166  | AGG | 43 | 129  |
| CAAGATACTATCGAAGCTGT  | 31981 | CGG | 42 | 1881 |
| TCGCCGTATGTGTAATGTGC  | 9849  | TGG | 42 | 1616 |
| ATTATCGGGGCAGTCAATGT  | 34476 | TGG | 42 | 1201 |
| CGATTGTACTTGCTTGATGT  | 36132 | TGG | 42 | 1145 |
| GAGTAATCGGAGACGATTTTC | 8417  | AGG | 42 | 580  |
| TGCTTGTAACGTCGTTAACG  | 20288 | TGG | 42 | 236  |
| GTAGTTAAACATATGAATGA  | 7048  | TGG | 42 | 55   |
| AAATCAATCGCAACAGAGAT  | 14054 | TGG | 42 | 12   |
| ACTCTCAATGAGATTAAATT  | 34024 | AGG | 41 | 2577 |
| CAACTGACAGCTAGATATTT  | 23282 | AGG | 41 | 2247 |
| CAACACAAAGAAGTACATCA  | 13390 | AGG | 41 | 2232 |
| TTAATTTTTAATGTTGTAAT  | 22772 | TGG | 41 | 2060 |
| TCAATTATCGGCTTTTTAAC  | 25997 | TGG | 41 | 1961 |
| ATGATGATGTGTATGTTACA  | 17827 | TGG | 41 | 1384 |
| GATAACATGTAATGATTACC  | 30148 | TGG | 41 | 891  |
| TAACCTCACAGTCATATCTA  | 11275 | AGG | 41 | 806  |
| ATTCAAGAAACACAAAAGAG  | 17135 | TGG | 41 | 743  |
| GTCAAGATGTATTACGAAAT  | 3328  | AGG | 41 | 302  |
| GACAGAAACTATTGAGTACG  | 3786  | AGG | 41 | 174  |
| TGAGTTGTTGACAAAAGATA  | 17164 | TGG | 41 | 127  |
| TAATAAACTTTAGAACAAC   | 27615 | CGG | 41 | 50   |
| AAAACGGAACGGTAAAGGT   | 38522 | TGG | 41 | 22   |
| AAAGACTTTAAAGGTATTGC  | 31352 | AGG | 40 | 1471 |
| ACTGCAACTACTGCTAATAT  | 25492 | TGG | 40 | 1355 |
| TCATAGAGGGCAAGAGCCAA  | 14619 | CGG | 40 | 515  |
| CTGGCACATTATGAAGCAGT  | 5661  | CGG | 40 | 455  |
| GGCAATACATGCAATCAGTT  | 25971 | TGG | 40 | 327  |
| TAGTGGCGTTCAAGAACTTA  | 7086  | TGG | 40 | 146  |
| TCAGTTGTATGAAAATATAA  | 12618 | GGG | 40 | 87   |
| AAATTCCACTTTGTTATTAC  | 4283  | AGG | 40 | 32   |
| GCGATGCGATTTTCATCAGCT | 26412 | TGG | 40 | 20   |
| GGAATATATATAAAGCAACA  | 10245 | TGG | 39 | 2488 |
| CTTTGTTGTTTGATGCATT   | 33521 | CGG | 39 | 1480 |
| GATGGACGACAACTTTTTGT  | 27154 | AGG | 39 | 606  |
| GACGGTATGAGTGATGCACT  | 26282 | TGG | 39 | 356  |
| GATTTTCCTAAAGACTTTAA  | 31343 | AGG | 39 | 53   |
| CTTAATGCGGTTGGTGTATT  | 24368 | AGG | 39 | 44   |
| GAGAAAACATGTTGTTAAGT  | 23959 | TGG | 38 | 2290 |
| ACAGTTAAGAGTCAGTGCTT  | 34322 | CGG | 38 | 2122 |
| CACCGGGTAAACTGTTATAC  | 39955 | GGG | 38 | 1893 |
| CACCTTATGTAAGTGTTAC   | 34787 | AGG | 38 | 1864 |
| TTATCAGATTTAAAAATCGT  | 31277 | TGG | 38 | 1831 |
| GTATCAGGATAACGAGCGAG  | 10124 | TGG | 38 | 1647 |

|                      |       |     |    |      |
|----------------------|-------|-----|----|------|
| GCTGGAATACTGCGATTATT | 13312 | CGG | 38 | 1005 |
| TTTGACCAAGCTGTTATCTT | 19907 | TGG | 38 | 468  |
| CTCAACTTTGCGAAGTCACT | 13745 | CGG | 38 | 452  |
| TAAAGGTAGACCCTAATATT | 35325 | TGG | 38 | 157  |
| TTTATAGGCTCTCCGTTTGT | 16166 | AGG | 38 | 147  |
| CGGATTCCCTATTAACGCA  | 2344  | AGG | 38 | 110  |
| GCGACAGGCGAAAGGCTGCA | 38308 | AGG | 38 | 13   |
| TGAATGGCGTGATTGGCTTA | 23345 | TGG | 37 | 1588 |
| CAAAAAGAGTACGTGGTGGC | 9540  | TGG | 37 | 1303 |
| TGCTATCAAATGCTTAATTT | 35741 | AGG | 37 | 1169 |
| AAGTTTTATAACGGCTCAGC | 4683  | AGG | 37 | 124  |
| TTGAACTTGATGAAGCAGTA | 11806 | GGG | 37 | 13   |
| ATAGATACTTCAGATAAGAA | 24634 | TGG | 36 | 2068 |
| ACTGGATAGACAAATGTCTA | 35617 | GGG | 36 | 1905 |
| ACGGAATACTAGAAGATGTT | 20704 | AGG | 36 | 1675 |
| AAGTACCGTCGTTATCTTTC | 5203  | TGG | 36 | 1649 |
| CAATTTGCGGATATGGTGCT | 16698 | AGG | 36 | 1644 |
| CCATTCATGTTCTGTCGGTT | 33943 | TGG | 36 | 1341 |
| CCAGAAAGGAGATAACGAAA | 6879  | TGG | 36 | 1322 |
| TTATAGGCTCTCCGTTTGTA | 16165 | GGG | 36 | 280  |
| ACAATTGCGTTCCAAGCCAT | 25817 | AGG | 36 | 175  |
| TAGATATAAAGAGTCTATTA | 15656 | AGG | 36 | 40   |
| TTAAGCGTTGCGAACGCTTC | 20401 | TGG | 35 | 1317 |
| AATAGTTGGACAGGTTCTCC | 34751 | GGG | 35 | 1223 |
| TCATCAACACCATCTTGTC  | 32421 | AGG | 35 | 1143 |
| TTATCTAAAGGGACTTAAGA | 19002 | CGG | 35 | 1037 |
| AGAAAAACAAAGATTTGTTT | 6142  | CGG | 35 | 988  |
| TCATACTACGCCAAATATTA | 35319 | GGG | 35 | 555  |
| AAGAATTATCTTAAGACGTG | 14305 | GGG | 35 | 415  |
| TTGTTAGGTACACCAAACAA | 16954 | TGG | 35 | 297  |
| CGTATTGTTGTACCACTCAT | 29338 | AGG | 35 | 205  |
| TTTGTGCTAGGACTCATAGA | 14606 | GGG | 35 | 28   |
| CAAAAAGCTGAAGAAAATAA | 5073  | CGG | 35 | 20   |
| CGAAAGTTATTGGGATTAGG | 7650  | GGG | 35 | 15   |
| AACTATCGCTTGTTAGATGA | 29699 | AGG | 34 | 2254 |
| CAGCCATATTTTGCTTTAAT | 32000 | TGG | 34 | 1453 |
| AGGGTTTCGCAAATAATTT  | 37660 | AGG | 34 | 1397 |
| CATTTCCCTTCTTGAGATGT | 38017 | TGG | 34 | 1149 |
| TGAATCAATCACACTTATTG | 12809 | AGG | 34 | 1127 |
| TCACGATGTTTTGTAGTGT  | 18080 | TGG | 34 | 993  |
| TTGGTAAGTGGAAGTTATCC | 33094 | AGG | 34 | 723  |
| ACAGTTCTAACATTTTTGAC | 25035 | TGG | 34 | 314  |
| TCATAGAGGGCAAGAGCCAA | 14619 | CGG | 34 | 178  |
| TCAACTAGTTTGTTAATGTT | 21767 | AGG | 34 | 49   |
| GGTTAATTCTAATAGTTGGA | 34742 | AGG | 33 | 1637 |

|                       |       |     |    |      |
|-----------------------|-------|-----|----|------|
| GACGGTGCATATTGTATTAA  | 39505 | TGG | 33 | 1632 |
| GGCGAATGGTACACAACATA  | 21615 | TGG | 33 | 1429 |
| AAAAGAAGTAACCAAAGACA  | 10519 | CGG | 33 | 1055 |
| GAGTTTATTCGAGGGAAAGG  | 31498 | TGG | 33 | 1026 |
| TTGCGTCCTGCGTCAATTGC  | 21647 | AGG | 33 | 811  |
| GAAACTCATAGATGAGGCAC  | 8507  | AGG | 33 | 805  |
| GTAGGAGTGA ACTATATAGC | 40021 | CGG | 33 | 599  |
| GCCTTTGGATACTCATTTTA  | 23608 | TGG | 33 | 446  |
| AAAAACCTGTATTA ACTAAA | 5956  | CGG | 33 | 367  |
| ATGCTTTTAGTTCTTTAGAT  | 28776 | GGG | 33 | 31   |
| TCACATCATTTGGTCAA AAC | 38507 | TGG | 33 | 12   |
| GACGGTGCATATTGTATTAA  | 39505 | TGG | 32 | 1992 |
| AATGCCGGAGCGGAATTAAT  | 26336 | CGG | 32 | 1579 |
| GAGTTTTCCCCTTGTGGTTT  | 13934 | CGG | 32 | 1064 |
| TAATAGA ACTATCAAGTAAA | 556   | AGG | 32 | 723  |
| AAAGCAATACGTGATGATGT  | 18192 | CGG | 32 | 685  |
| TTATTTCTCCAGTTCTATAT  | 30321 | TGG | 32 | 149  |
| TTCTATAAATTTGCAGTATA  | 3908  | CGG | 32 | 53   |
| CGAAAGATAGCAGACGAAGA  | 15219 | AGG | 32 | 18   |
| ATTAATCGGCAAAGTAGCTG  | 26350 | AGG | 32 | 14   |
| ATGGATCCTATTTTAGGTAA  | 6795  | AGG | 31 | 1447 |
| CGACTAAAGGAGGCAACCAA  | 29611 | TGG | 31 | 1402 |
| AACTCTTCTTTAAATTTAAT  | 33428 | AGG | 31 | 1281 |
| TCCAAAGCCCCTTGT AATAA | 23060 | CGG | 31 | 992  |
| TCCGAACCTATCCGTTGCC   | 34636 | AGG | 31 | 648  |
| ACGCAATTTTTTCGTACCTTC | 14720 | CGG | 31 | 620  |
| AGAGGGAGAGTCGCTCGTAC  | 23125 | TGG | 31 | 113  |
| TTATTTTTTTCGTTTTTTTTG | 40224 | GGG | 31 | 53   |
| AATGATGGAAGTATATTGTC  | 7327  | GGG | 31 | 33   |
| TTGATTTTGTCCAATAACTC  | 36925 | AGG | 30 | 2177 |
| ATACTTGATAAGTCTACTAT  | 27938 | TGG | 30 | 2061 |
| GACTACTTTGTGCGCAGCAT  | 26363 | TGG | 30 | 1553 |
| CTTAAATACTTAGCGATATT  | 38802 | AGG | 30 | 1535 |
| GAAAGTGTATTGCAACAGAT  | 37145 | TGG | 30 | 1433 |
| AATGGTTGAAGATGGAACAT  | 24478 | TGG | 30 | 1405 |
| ATAGAGTTAACTAACAATA   | 15306 | TGG | 30 | 1140 |
| TGTTCAGAACTTATAGATAA  | 31662 | CGG | 30 | 974  |
| CATCATTCTTTTTATAAAAC  | 32594 | GGG | 30 | 917  |
| CGAAAGATAGCAGACGAAGA  | 15219 | AGG | 30 | 432  |
| TAACGACCCTGAAAAATGGT  | 27297 | CGG | 30 | 154  |
| AAATCTTCTTTTTCTTCAAT  | 16429 | TGG | 30 | 131  |
| ACTAGATGCTTTCACTAAAA  | 29968 | AGG | 30 | 92   |
| ATTATTTCAGTGTACTTTTT  | 13049 | CGG | 30 | 49   |
| TAGAAGAATCAACAGCAAAA  | 37568 | TGG | 30 | 13   |
| AACGCTTAAACCAACTGAAT  | 20431 | AGG | 29 | 1600 |

|                       |       |     |    |      |
|-----------------------|-------|-----|----|------|
| TCGAGCAGTATTTTTCATAG  | 21691 | AGG | 29 | 1097 |
| TTGTTGAATTACCTTTAACA  | 32234 | AGG | 29 | 1055 |
| TTCCCGTATAACAGTTTACC  | 39969 | CGG | 29 | 1025 |
| TCATCTAAATCATAAGTAAC  | 16561 | AGG | 29 | 894  |
| CCGACGGTTAAAATTTGGAC  | 37328 | AGG | 29 | 840  |
| AACTTCAATTGCAGAACAAA  | 29258 | AGG | 29 | 831  |
| AATCCTTTTTTCGACATGAGT | 7713  | AGG | 29 | 604  |
| GGTATGTGGGTGTCTGGTGA  | 15720 | CGG | 29 | 386  |
| AAGATATAGAATGCTTTGGT  | 10630 | AGG | 29 | 87   |
| CGGACAAGGCAAAGCATTCCG | 35827 | CGG | 29 | 74   |
| AAACAAAACGGTATAAACAT  | 2288  | CGG | 29 | 51   |
| GAATGACGGTATGAATATAT  | 6337  | CGG | 29 | 43   |
| GGCTAATTACAGATATCCTA  | 34564 | AGG | 28 | 1306 |
| TGAGACACAAATTTGAACAA  | 24826 | CGG | 28 | 1241 |
| AATTATTCAATGGTCAATGT  | 37782 | CGG | 28 | 1221 |
| GTTTACCATCATAACAAGGAT | 40369 | GGG | 28 | 1179 |
| ATACGTCCATCAACAAGCGG  | 28429 | TGG | 28 | 1110 |
| GTTAGAAAAACGCGACGCAG  | 19224 | AGG | 28 | 591  |
| ACAGTTCGCTACACAATACG  | 21938 | AGG | 28 | 259  |
| CGTCTATCTGTCTTCCCTC   | 34085 | TGG | 28 | 192  |
| TCGTTTGTAGGCAATCTATC  | 27306 | AGG | 28 | 58   |
| TTTAAACGACGTATCGATAT  | 30713 | TGG | 28 | 28   |
| TCTTTCAATATCGTTGATAG  | 36590 | TGG | 27 | 1491 |
| TCCGAAAATGGCATTTCGGT  | 7173  | TGG | 27 | 1472 |
| ATAGACAGGTTTACTAAGCA  | 22068 | TGG | 27 | 1266 |
| GGTAAACATCACGGAATGTT  | 22440 | TGG | 27 | 907  |
| AATTAAACTACCCACCATAT  | 14403 | AGG | 27 | 374  |
| TAATTAAGGGGTGATTTTTA  | 37404 | TGG | 27 | 335  |
| AAAGTTACATTACAGCCCCT  | 6034  | GGG | 27 | 247  |
| GCACATATCCATGTAGTGAA  | 10146 | TGG | 27 | 193  |
| GGTTTTATTACAAAAGATGA  | 37500 | AGG | 27 | 167  |
| AAAAGCAGAAGTAGAGGTTC  | 5312  | CGG | 27 | 142  |
| GAGAAATATAAGCGAAAAGG  | 18600 | TGG | 27 | 113  |
| TATGTTTGGCACCCCTACAAA | 16170 | CGG | 27 | 66   |
| AATAAATTGTTTTTAGCTAT  | 21163 | TGG | 26 | 1586 |
| TCGTCCCACACTCGATATTT  | 10901 | CGG | 26 | 1127 |
| TAACCTCACAGTCATATCTA  | 11275 | AGG | 26 | 1081 |
| GCAACAATGAGAGAAACAGT  | 21894 | CGG | 26 | 1010 |
| AGTTTAATTGATACTGGAGA  | 13239 | TGG | 26 | 789  |
| TTGAAACTGGTGGAATGTA   | 16467 | AGG | 26 | 743  |
| AAGTCACGTTGTAGTGGAAC  | 15498 | TGG | 26 | 688  |
| ATATCTATTGATGTTGTA    | 11190 | TGG | 26 | 400  |
| GCAACGTTGCCGAAACCACA  | 13941 | AGG | 26 | 338  |
| TGGTTCGATATCTTTATTGC  | 13294 | TGG | 26 | 294  |
| GATTCTTCTAACTTATTAAC  | 17482 | TGG | 26 | 134  |

|                       |       |     |    |      |
|-----------------------|-------|-----|----|------|
| TGACACCAATTTCTTCAGAA  | 757   | AGG | 26 | 17   |
| TCATACTTAATTGAATTGTC  | 27063 | TGG | 26 | 15   |
| AGGTGATTACCATGCTTAAA  | 34249 | GGG | 26 | 13   |
| TAGAAACATTCTCTAAAAC   | 6734  | TGG | 25 | 1626 |
| TTAATACGTCCATCAACAAG  | 28432 | CGG | 25 | 1166 |
| AAACTACCCACCATATAGGC  | 14399 | AGG | 25 | 1117 |
| GCAACGTGATGAGCTTATTG  | 11440 | GGG | 25 | 1020 |
| TTTTGTTCTTCTGATTGCTC  | 19161 | AGG | 25 | 980  |
| TTGATTTTGTCCAATAACTC  | 36925 | AGG | 25 | 704  |
| GAAATCCATACCAACCATCT  | 38234 | GGG | 25 | 693  |
| AGCGACAGGAGAGGTAGACA  | 39576 | AGG | 25 | 678  |
| AGAGCACCATTATAGTGTC   | 31087 | AGG | 25 | 594  |
| TCATCTAAATCATAAGTAAC  | 16561 | AGG | 25 | 390  |
| AGCGACAGGAGAGGTAGACA  | 39576 | AGG | 25 | 366  |
| TAAGTACGGTGCTGATAGCA  | 21308 | TGG | 25 | 250  |
| TACTAGCAATGTATGAGCT   | 13680 | AGG | 25 | 197  |
| ATTCGACTAAAGGTAAGAGT  | 14664 | GGG | 25 | 129  |
| AGCTGGACTTGATAGCGCAA  | 18275 | TGG | 25 | 51   |
| GTAAGCGTTAGTGGCATT    | 25184 | TGG | 24 | 1267 |
| TAGCGTCCATTACACCTAGT  | 11361 | TGG | 24 | 1244 |
| GATTACTTACGTAATGCGAA  | 676   | AGG | 24 | 1172 |
| ACCAGCTTAATGTAATAAT   | 28247 | TGG | 24 | 1082 |
| GCTAAGTTATATAAACAAT   | 36170 | CGG | 24 | 1022 |
| GGAACAACGGTACTGACGA   | 4004  | AGG | 24 | 793  |
| AAGTAGCGCAATGAGTATGT  | 16792 | AGG | 24 | 709  |
| TTGTTAGGTACACCAAACAA  | 16954 | TGG | 24 | 536  |
| AATGGTTGAAGATGGAACAT  | 24478 | TGG | 24 | 524  |
| TGTCCTAATACTTGTAAATAT | 25693 | AGG | 24 | 314  |
| ATTTCTACCTGTGCTGTTTC  | 31124 | TGG | 24 | 107  |
| CATCCATTAGCACAATTGAT  | 28409 | AGG | 24 | 105  |
| AGGGATATGTTCCCAATAAC  | 31223 | CGG | 24 | 94   |
| CGTTTTTTTTGGGGCAAAAAA | 40234 | AGG | 24 | 46   |
| TAGAAATAGTGTGATGATG   | 16651 | AGG | 24 | 36   |
| AGAAAGGATTACATCAATAA  | 36068 | AGG | 24 | 19   |
| AATGTTGAAAGGAGAGAAAA  | 5843  | AGG | 24 | 12   |
| GCGCTTAACAAAATACTTAA  | 35789 | AGG | 23 | 1280 |
| TAAATCAAGTGGGTGTGTT   | 18412 | GGG | 23 | 1140 |
| CTAATCGTTACATTCACAAT  | 26638 | AGG | 23 | 1095 |
| TTTCTGTTCAATTTAGAGTT  | 14132 | AGG | 23 | 1079 |
| CCTTTTGCACCAGGTTGTCC  | 36784 | CGG | 23 | 1014 |
| GCAACAATGAGAGAAACAGT  | 21894 | CGG | 23 | 876  |
| TGTTTTTGTCCGTGTCTTTA  | 29361 | CGG | 23 | 833  |
| GCACGTTACGGTATCTTACA  | 20255 | AGG | 23 | 776  |
| GGATTGAAATGTGAGAGATG  | 7747  | TGG | 23 | 699  |
| TCAAAGTTTACAGTCGTTG   | 12525 | AGG | 23 | 630  |



|                       |       |     |    |      |
|-----------------------|-------|-----|----|------|
| AGGGTTTCGCAAAC TAATTT | 37660 | AGG | 23 | 542  |
| AAGTACCGTCGTTATCTTTC  | 5203  | TGG | 23 | 509  |
| TGGAACTGGTGCAAGAATAT  | 15512 | TGG | 23 | 462  |
| GTTAGCACTAATGGGTGATT  | 20227 | GGG | 23 | 316  |
| TTACTTGTACTAGATGATAT  | 8230  | GGG | 23 | 285  |
| CAGGAGAAAGCGCAAGTGGT  | 39005 | GGG | 23 | 199  |
| TCCTTTCACTTATAATCACT  | 26829 | TGG | 23 | 198  |
| TATAACGATCCTGGAGCAGT  | 38752 | AGG | 23 | 198  |
| CGGAAAGCCTCACGCAGACC  | 5642  | TGG | 23 | 194  |
| TGCATTACTGCATTTGTATA  | 30073 | TGG | 23 | 135  |
| GGTACTAATCCGGCAATCAC  | 24313 | TGG | 23 | 98   |
| CAGAATGAACTATGAAACAG  | 11353 | GGG | 23 | 92   |
| TACGTCAGCGATTTATAATC  | 30412 | CGG | 23 | 92   |
| TCGTAATTATCTATTTCTAT  | 21986 | AGG | 23 | 73   |
| ATTTAATGATTCTGCAGCTG  | 308   | AGG | 23 | 58   |
| GTACAAGTTGGTCACAGATA  | 26049 | TGG | 23 | 52   |
| TGCAAACCCCGCTAAAATGG  | 23989 | CGG | 23 | 19   |
| CTTTTATATGAGCAAGAGCT  | 8793  | AGG | 22 | 1324 |
| CACTGGATAGACAAATGTCT  | 35616 | AGG | 22 | 1277 |
| ACAAGTGCTAATTAACCTGA  | 17521 | AGG | 22 | 1040 |
| TCAGCTAAGCGCATGCCATA  | 9571  | AGG | 22 | 914  |
| CCTAACAAACAAAGAGATGAT | 16985 | AGG | 22 | 874  |
| TGGAACTGGTGCAAGAATAT  | 15512 | TGG | 22 | 700  |
| CACAAATGATTTAGGGTAGG  | 38158 | TGG | 22 | 687  |
| TTACTAAGCATGGCACGATA  | 22078 | CGG | 22 | 537  |
| CATATCGTACCAGATTGGCA  | 10188 | AGG | 22 | 536  |
| AACATTCACGTGATCCGTAC  | 9735  | TGG | 22 | 238  |
| TGATGAGGAACTTCGCGGAA  | 33575 | TGG | 22 | 208  |
| GACGCAGGGTATTCGACTAA  | 14654 | AGG | 22 | 175  |
| ACAACATTA AAAATTAATGA | 22794 | CGG | 22 | 91   |
| GTGTATATTTGCCAATTGTC  | 7002  | AGG | 22 | 87   |
| AGATGTTAAAGCTAATGATA  | 27465 | AGG | 22 | 85   |
| ATAGATAGTTTTTTATTGTC  | 5315  | CGG | 22 | 58   |
| ATTTAAGGTGGTTATTCTTA  | 1698  | TGG | 22 | 46   |
| GTA CTTACCAGAAACAGCAC | 31133 | AGG | 22 | 46   |
| GTTGTCTCAAATGTAGGTGA  | 26264 | CGG | 22 | 35   |
| CTACGTTCAATAAATGTGAA  | 14455 | AGG | 22 | 30   |
| CTAACAAAACAAATACTGAG  | 33697 | GGG | 22 | 12   |
| GCAAAGATCATTAAACAAAA  | 2276  | CGG | 21 | 1200 |
| AGTGGTAAACCGCTTGTTGA  | 19958 | AGG | 21 | 1088 |
| GTATCAAATGGATATACCTA  | 30556 | TGG | 21 | 1025 |
| AATTAAGTGGTACGTAGACA  | 33803 | TGG | 21 | 705  |
| ATTGAAATGAGGTGCATACA  | 34363 | TGG | 21 | 392  |
| AGCTTTTAGGAAAGCGAGCA  | 29512 | TGG | 21 | 89   |
| TTGCGATAGCGTATGCTAGG  | 8057  | TGG | 21 | 66   |

|                       |       |     |    |      |
|-----------------------|-------|-----|----|------|
| ATTAATAACCTAGTAAGGTT  | 6264  | AGG | 21 | 57   |
| AAGATTTAAATGTAGATAAC  | 39754 | AGG | 21 | 49   |
| GACCAATCTTAGGTAAGTTA  | 24938 | TGG | 20 | 968  |
| TATTATGTATTTGAGGAGA   | 16895 | AGG | 20 | 930  |
| TTACTTGTACTAGATGATA   | 8229  | TGG | 20 | 892  |
| TAAAAAGCGTTTTAGCGCTT  | 1903  | GGG | 20 | 818  |
| TCAAGTGATTTAGGAATATC  | 37684 | AGG | 20 | 817  |
| AATGAATGTTAAGCGAATAT  | 35704 | GGG | 20 | 801  |
| TAAGCGCAGTTAACACATCT  | 32351 | AGG | 20 | 729  |
| TTCTTCAATACTGTCTTTAA  | 28064 | AGG | 20 | 726  |
| AGAGGATAGCTCTTTATTAA  | 26522 | AGG | 20 | 704  |
| AGAGTTATTACAAATACAAA  | 11907 | AGG | 20 | 649  |
| ACATTTAGTAAATCATTACG  | 39108 | AGG | 20 | 602  |
| GCATATAATTACTTCGGTAT  | 35948 | TGG | 20 | 444  |
| ACATCTGTTTCAATTCGTT   | 23689 | TGG | 20 | 426  |
| GACGGTATGAGTGATGCACT  | 26282 | TGG | 20 | 409  |
| AAAAAGAACGGGTTAACTCC  | 9509  | TGG | 20 | 246  |
| TATATGTATCGAGTGATGAC  | 40072 | AGG | 20 | 164  |
| TTACAACATCGTCGATAATA  | 36441 | AGG | 20 | 79   |
| AGCTTTTAGGAAAGCGAGCA  | 29512 | TGG | 20 | 71   |
| CAAATAGATAAAGGTGACAG  | 14987 | TGG | 20 | 30   |
| AAAAAGCGCATCTCAACCGA  | 37312 | CGG | 20 | 30   |
| CTCTATTATCTCTTCGTACA  | 18682 | AGG | 19 | 1313 |
| AAAATAGAATAGTTTGTGTA  | 33054 | CGG | 19 | 1194 |
| GGCGTTGCGCAACCTGGTTG  | 38551 | GGG | 19 | 971  |
| ACGTCATCAAATTCCTTTAT  | 16181 | AGG | 19 | 919  |
| ACTTACTTAGCAAAGGTGT   | 19706 | AGG | 19 | 893  |
| AAACTACCCACCATATAGGC  | 14399 | AGG | 19 | 772  |
| ATAGGGGTAACCTATTGGACC | 30827 | TGG | 19 | 634  |
| CTTATCAAATACCGTGTCTT  | 10514 | TGG | 19 | 548  |
| CTAACACATCACCTATTTT   | 28564 | AGG | 19 | 530  |
| ATTATCGGGGCAGTCAATGT  | 34476 | TGG | 19 | 514  |
| TTATCCAGTGTTATAAGTGT  | 21489 | CGG | 19 | 511  |
| TTTACGCGGTTATCTGTCA   | 10047 | TGG | 19 | 469  |
| TCAATTAGTTTGTCCGCTA   | 5991  | TGG | 19 | 385  |
| ACAAGGTATTATGAGTGGAG  | 18152 | AGG | 19 | 321  |
| ACTCTTTTGAACCATTC     | 9511  | AGG | 19 | 211  |
| ATCAAGTGGGTGTGTTGGGC  | 18416 | AGG | 19 | 174  |
| AACATCTCAAGAAGGGAAAT  | 38035 | GGG | 19 | 166  |
| AAGTTATGAGGGTTATTTAT  | 32862 | CGG | 19 | 126  |
| AAACTTACCAATAAGATCAT  | 4908  | TGG | 19 | 116  |
| TGTTTACCCATATATTGTTG  | 21839 | TGG | 19 | 75   |
| CTCATCAATATCATTCTGAT  | 17679 | TGG | 19 | 70   |
| ATAAGTGCTAGTGCGTATAA  | 11667 | CGG | 19 | 60   |
| TTCAGTGATTTCTTAAATGC  | 26321 | CGG | 19 | 40   |

|                       |       |     |    |      |
|-----------------------|-------|-----|----|------|
| ATTGCAAATGCTAATTGTGG  | 9915  | TGG | 19 | 37   |
| TAAATCAACGGTATTGTTCC  | 33007 | CGG | 19 | 33   |
| GCAATACCTTTAAAGTCTTT  | 31333 | AGG | 18 | 1039 |
| GTTATCGGATTCGTTAATAC  | 33381 | TGG | 18 | 947  |
| GGATTCAATGTTATATTTAA  | 22920 | CGG | 18 | 879  |
| TCTATCAATAAATTGTCCGT  | 30182 | TGG | 18 | 824  |
| TGTTTTTGTCCGTGTCTTTA  | 29361 | CGG | 18 | 777  |
| CCAAATATCTGACCAATCTT  | 24949 | AGG | 18 | 743  |
| AGTATAAAAGAATGTTTATA  | 10613 | TGG | 18 | 590  |
| CTTTTGCATAGCGTATGCT   | 8060  | AGG | 18 | 507  |
| AGAATTGGTTAACACCTCTT  | 30867 | TGG | 18 | 483  |
| CTAAATCAATGGCTCAACGA  | 23769 | TGG | 18 | 447  |
| CCTATCATCTCTTTGTTGTT  | 16969 | AGG | 18 | 323  |
| GCGAATGGTACACAACATA   | 21615 | TGG | 18 | 309  |
| ATGAAAATATAAGGGAGTGT  | 12626 | GGG | 18 | 229  |
| GATTGGGATTACGCACGTTA  | 20243 | CGG | 18 | 222  |
| AAAGACTTTAAAGGTATTGC  | 31352 | AGG | 18 | 211  |
| TTAATAACCTAGTAAGGTTA  | 6263  | GGG | 18 | 132  |
| ACCGTTGATTTATGTTTCATT | 32979 | AGG | 18 | 126  |
| AAACTCATAGATGAGGCACA  | 8508  | GGG | 18 | 104  |
| TTATCAGATTTAAAAATCGT  | 31277 | TGG | 18 | 24   |
| GCGCTTAACAAAATACTTAA  | 35789 | AGG | 18 | 18   |
| TTTATGTTATAGCTAGCCTT  | 39803 | CGG | 17 | 969  |
| TCAACGCTACCTGGTAAATC  | 32823 | CGG | 17 | 967  |
| TTCTTTATGATAATATGGAT  | 16126 | AGG | 17 | 947  |
| ATTGATCATATAGTTGTAAT  | 34988 | GGG | 17 | 497  |
| GCAGTCATTGGTGTATTCAT  | 25526 | TGG | 17 | 439  |
| GTAGAACTTATGCAAAGTAC  | 11052 | AGG | 17 | 325  |
| TATGTTTGGCACCCCTACAAA | 16170 | CGG | 17 | 320  |
| CCGAAAGCGTTTAGAGATGC  | 31061 | AGG | 17 | 195  |
| CGTATTGTTGTACCACTCAT  | 29338 | AGG | 17 | 168  |
| AAAAGAATTTGATGACGTGT  | 16202 | TGG | 17 | 95   |
| GCAAGCGACTACAAAAAAG   | 38685 | AGG | 17 | 95   |
| GATGACATGAACGCTATAGA  | 26714 | CGG | 17 | 59   |
| ACCCTGACCATCCCGAGCAT  | 15544 | TGG | 17 | 58   |
| TTCCCGTATAACAGTTTACC  | 39969 | CGG | 17 | 52   |
| ATTGAAGAATTTGATGATAA  | 4433  | CGG | 17 | 35   |
| GTACAAGTTGGTCACAGATA  | 26049 | TGG | 17 | 35   |
| CTCAACCGACGGTTAAAATT  | 37323 | TGG | 17 | 14   |
| AAATAAATACCATTTATTAC  | 830   | CGG | 16 | 928  |
| TTTTCAACAGGATTTAGTGA  | 10412 | TGG | 16 | 776  |
| TAAATCTTTTTAGAGTTATA  | 32910 | AGG | 16 | 701  |
| GTGAAACACGCTGTACAAAC  | 22371 | AGG | 16 | 653  |
| TTTGGAGCACTGTTACAAGT  | 26100 | TGG | 16 | 645  |
| GGTACTAATCCGGCAATCAC  | 24313 | TGG | 16 | 626  |

|                       |       |     |    |     |
|-----------------------|-------|-----|----|-----|
| TTTATTAACCTTACAAAAA   | 5010  | GGG | 16 | 546 |
| CAACGACTCTAAAACGTATA  | 37030 | CGG | 16 | 519 |
| TGGTTCTTTGATGTACTGCC  | 31085 | TGG | 16 | 487 |
| TAAAGTTACATTACAGCCCC  | 6035  | TGG | 16 | 483 |
| AATAGGATCTGTGGTTTTGT  | 40170 | TGG | 16 | 442 |
| TGAGGAAGAAGCCACGAATA  | 10815 | CGG | 16 | 406 |
| AGCGTCGTTAGCGCATGAAG  | 15461 | AGG | 16 | 402 |
| AAAACCTGTGATTAGTAGCA  | 2641  | GGG | 16 | 299 |
| CCGATTAAGTGCATAATAGT  | 25138 | AGG | 16 | 232 |
| AATAAGGAGTAACTCGTAT   | 17877 | AGG | 16 | 225 |
| ACATTATGAAGCAGTCGGCA  | 5667  | AGG | 16 | 159 |
| AATGCCCTACATCTTGTGC   | 14480 | AGG | 16 | 148 |
| CGCGGGTCATCAAATTGGT   | 35146 | TGG | 16 | 131 |
| ACCTTGTAAGTAGTTAGGGT  | 30647 | TGG | 16 | 121 |
| TACAAGTGTACTTACAAGTA  | 1966  | CGG | 16 | 120 |
| ATAAGTGCTAGTGCGTATAA  | 11667 | CGG | 16 | 105 |
| AACTTCAATTGCAGAACAAA  | 29258 | AGG | 16 | 66  |
| TCGGTTGATTCTATATCTAA  | 6310  | CGG | 16 | 63  |
| TGTTTTGTTAGTTTTTCAGTT | 33669 | CGG | 16 | 58  |
| ACAATAACAGAAGCTTGGAA  | 25592 | CGG | 16 | 43  |
| GCTCTCTCGTTGCATAATTC  | 9614  | TGG | 16 | 41  |
| CGACCTCTATGCTTGCAGTT  | 10853 | TGG | 16 | 39  |
| TATGTGTTTTCTGGTGTGG   | 2808  | TGG | 16 | 38  |
| CTATAAATATGAGGAGGCAC  | 11849 | AGG | 16 | 33  |
| CTTAATTTAGGCAAGTATCA  | 35753 | AGG | 15 | 942 |
| AATGGTTACGAGTATAAAGA  | 7816  | CGG | 15 | 847 |
| ATATTTGGCAATGTGTTCCG  | 24980 | TGG | 15 | 842 |
| TTAGGTAAAACATCAGGTTC  | 33280 | TGG | 15 | 835 |
| GACAGAACTATTGAGTACG   | 3786  | AGG | 15 | 721 |
| TCACTTACTACCTGCCTATA  | 14405 | TGG | 15 | 713 |
| GCAACGTTGCCGAAACCACA  | 13941 | AGG | 15 | 636 |
| AATCAAGAAAAGTTTTATAA  | 4674  | CGG | 15 | 617 |
| GCATATAAATTACTTCGGTAT | 35948 | TGG | 15 | 568 |
| TGAGGAAGAAGCCACGAATA  | 10815 | CGG | 15 | 546 |
| ATGCTTGGTTTTTTCGTCTGA | 35542 | TGG | 15 | 542 |
| CTAAATCAATGGCTCAACGA  | 23769 | TGG | 15 | 539 |
| CCGATAATTTGAGCGACTGC  | 25276 | TGG | 15 | 457 |
| CCTATCATCTCTTTGTTGTT  | 16969 | AGG | 15 | 441 |
| AGAAAATCGCCATCAATTC   | 454   | AGG | 15 | 437 |
| GGATCACGTGAATGTTTTTG  | 9712  | TGG | 15 | 403 |
| GAAACACTTTCTTCATCTAC  | 37945 | TGG | 15 | 402 |
| CTAATACATGTTTGTCATAG  | 5695  | TGG | 15 | 388 |
| TTATCTAATTGTTTATCGAT  | 1389  | TGG | 15 | 346 |
| AAAGGAACGCTCGACGGACA  | 35813 | AGG | 15 | 340 |
| TTTGAAATGTACGAGATGGA  | 10556 | AGG | 15 | 322 |

|                        |       |     |    |     |
|------------------------|-------|-----|----|-----|
| TCATAGAGGGCAAGAGCCAA   | 14619 | CGG | 15 | 313 |
| GAGCTTTCCTTACGTTGCTT   | 23643 | TGG | 15 | 290 |
| TTATGATTTGTATAAGCTGT   | 8936  | TGG | 15 | 273 |
| CTATCTCGTAAGTTCAGCGT   | 11931 | TGG | 15 | 251 |
| GGTATATATGCTACTGGTCC   | 21546 | TGG | 15 | 211 |
| TTTGTGTCGTTCATATTCGT   | 38125 | AGG | 15 | 208 |
| GAGAATTACAAGGAAATCAT   | 23226 | GGG | 15 | 182 |
| ACAAAGCGATTTTACAATTT   | 22960 | TGG | 15 | 155 |
| TAGATAACAGGCAGGTACTION | 39766 | CGG | 15 | 123 |
| CGTATATTTCTTCTTTTTGA   | 29736 | TGG | 15 | 100 |
| GCAAGTATATATTATGATGA   | 13718 | CGG | 15 | 87  |
| CCAGAAAGGAGATAACGAAA   | 6879  | TGG | 15 | 84  |
| ACTAAGACATCAATTTTAGT   | 2246  | TGG | 15 | 69  |
| CGCTATTAATGTTAGTACAA   | 27769 | AGG | 15 | 69  |
| CTTGGTCGTCATATCCAAAT   | 5134  | TGG | 15 | 65  |
| CCATCATTCTTTTTATAAAA   | 32595 | CGG | 15 | 63  |
| GATATTGATGAGTATATCGA   | 17706 | GGG | 15 | 32  |
| TAACCTAGTCATGAAATGGT   | 3573  | AGG | 14 | 821 |
| CAACGACTCTAAAACGTATA   | 37030 | CGG | 14 | 746 |
| TGATTTCACTGAAAACG      | 23045 | AGG | 14 | 719 |
| ACAAGAGTGCCGGATTTACC   | 32830 | AGG | 14 | 689 |
| GTCAAGCGCCACAGCCATTT   | 21637 | TGG | 14 | 667 |
| TCTACTACGTCCGTAATGCT   | 4546  | AGG | 14 | 629 |
| AGAGTTATTACAAATACAAA   | 11907 | AGG | 14 | 582 |
| ATTTCTGCTTGTGCATATTC   | 19753 | AGG | 14 | 513 |
| AAATTCGAGGGATTAGGCAA   | 28130 | AGG | 14 | 479 |
| AACAACCTATTGAAAGATTA   | 24206 | CGG | 14 | 465 |
| TTGAAATGAGGTGCATACAT   | 34364 | GGG | 14 | 445 |
| ACAGTTTCAGGACCCCAACC   | 38547 | AGG | 14 | 414 |
| TCCGATAAAATAACATTGCC   | 19546 | TGG | 14 | 409 |
| AACTAGGTGTAATGGACGCT   | 11379 | AGG | 14 | 362 |
| ACAGAATTGGAAATTATGAA   | 5442  | AGG | 14 | 347 |
| GCATTCTCTGTGCGCAGGTCT  | 24416 | TGG | 14 | 338 |
| TTATGTTATAGCTAGCCTTC   | 39804 | GGG | 14 | 330 |
| AGCAATTCAATTGCACAGTA   | 13911 | TGG | 14 | 329 |
| GAAGCCTTAAACGCACCTTA   | 9572  | TGG | 14 | 300 |
| AACAAAACGGTATAAACATC   | 2289  | GGG | 14 | 261 |
| TCACAACCTGCCATTGTGATG  | 2568  | AGG | 14 | 245 |
| GGTCAAAACTGGAACGGTAA   | 38518 | AGG | 14 | 235 |
| CGACGAAAGTTATTGGGATT   | 7647  | AGG | 14 | 206 |
| AGCTAGGGAGTTTAAACGGTA  | 3714  | TGG | 14 | 178 |
| TAAAACAATTAAGGATTTA    | 21073 | TGG | 14 | 152 |
| TCCGCAAAACGCCGGTTATT   | 31228 | GGG | 14 | 145 |
| GTAAGTGGAACCTTATCCAGG  | 33097 | TGG | 14 | 111 |
| TCAATACCTTTACCTAAAAT   | 6805  | AGG | 14 | 101 |

|                       |       |     |    |      |
|-----------------------|-------|-----|----|------|
| AGATTGCTTGTTAAAAACGG  | 30218 | CGG | 14 | 93   |
| ATCATAAAGCGTATATACAA  | 8968  | GGG | 14 | 89   |
| CGATAAGAAAATAGAAGAGT  | 21350 | GGG | 14 | 83   |
| GTAGTAGAAGCAATTAGAAA  | 4577  | TGG | 14 | 54   |
| AACTATCATTAAAAGTTAAA  | 22519 | TGG | 14 | 26   |
| ATTACTTATATTGCTAATCT  | 39538 | GGG | 14 | 14   |
| AAAAGAGTTGTCTCAAATGT  | 26258 | AGG | 14 | 13   |
| GCTAAATGAAGATAGTTCTT  | 27802 | TGG | 13 | 1098 |
| ATGTACGTAGCGGTATAATG  | 37640 | AGG | 13 | 837  |
| TGAATCATCACATTTATTGG  | 11327 | AGG | 13 | 825  |
| AATACTGTCTTTAAAGGAAC  | 28070 | GGG | 13 | 734  |
| ACAACATTCAAAGATTCAAC  | 12466 | AGG | 13 | 673  |
| AACGCCCTGCTACTAATCAC  | 2629  | AGG | 13 | 633  |
| TCATAAGTGATACCTTGCAT  | 30583 | AGG | 13 | 581  |
| ATTCACATTCCAGCAAGCAC  | 35599 | TGG | 13 | 505  |
| GTGTCTGTTGATGACGTTAA  | 19024 | AGG | 13 | 480  |
| TAACTAGCCACTGTGTATAT  | 13350 | AGG | 13 | 474  |
| TTATTTGCTAATAGTTTGTT  | 2738  | CGG | 13 | 452  |
| TCAAGTTGTCTATAAATATG  | 11840 | AGG | 13 | 355  |
| AGCACAAACTTTTCTTGCTT  | 14575 | CGG | 13 | 354  |
| ATTAAGTACCTTGTTCTGC   | 19588 | TGG | 13 | 262  |
| ATGGATTTATTCAGCTGTAT  | 30283 | TGG | 13 | 194  |
| TTAATAATTGTCTTTGATCT  | 23367 | AGG | 13 | 178  |
| GCTGTAGTGAAGTATAGAAA  | 3134  | CGG | 13 | 155  |
| TCCGTTTTATCAGTGCCTAT  | 29215 | CGG | 13 | 125  |
| CCACAATTAGCATTTGCAAT  | 9934  | AGG | 13 | 118  |
| ATACCTTGTGTTACGCGGTA  | 17095 | TGG | 13 | 105  |
| CATTA AAACTTTTTATGTGT | 33761 | GGG | 13 | 96   |
| TAAAGTTACATTACAGCCCC  | 6035  | TGG | 13 | 92   |
| TCATAGAGGGCAAGAGCCAA  | 14619 | CGG | 13 | 92   |
| ATAATTATGGATCCTATTTT  | 6801  | AGG | 13 | 75   |
| TCATCACCTTTAAA ACTCCA | 21575 | CGG | 13 | 72   |
| CATGTTATTTGGCGTTCAAG  | 15362 | TGG | 13 | 71   |
| AGCTAGGGAGTTTAACGGTA  | 3714  | TGG | 13 | 69   |
| TATTACCGCAAAGATAATTT  | 2947  | AGG | 13 | 62   |
| TCCAATAACCGGCGTTTTG   | 31213 | CGG | 13 | 60   |
| GTTATTTTTTGC GTTTTTT  | 40223 | GGG | 13 | 41   |
| ACTTAAGGAGGAACAACAAA  | 942   | TGG | 13 | 18   |
| AGCTTTAGTTGCATTATATT  | 23906 | TGG | 13 | 18   |
| TTGATATCAAACAGCTGAA   | 7505  | TGG | 13 | 13   |
| AACAGAATGAACTATGAAAC  | 11351 | AGG | 12 | 736  |
| ATTGAACAAAGCACCGAATA  | 23153 | TGG | 12 | 565  |
| ATTCAGGGAGCGAGATGCA   | 8432  | TGG | 12 | 529  |
| CAAGGTATCACTTATGATGC  | 30605 | AGG | 12 | 519  |
| CATTCGAAAGGATTAGAATC  | 19103 | TGG | 12 | 515  |

|                       |       |     |    |     |
|-----------------------|-------|-----|----|-----|
| TGTACGTCTAACGGCTTACC  | 12027 | TGG | 12 | 498 |
| CGGAATACTAGAAGATGTTA  | 20705 | GGG | 12 | 486 |
| TAATATCGTAAAAGCGTTAG  | 25177 | TGG | 12 | 471 |
| TTTAAATCAAGTGGGTGTGT  | 18411 | TGG | 12 | 462 |
| GCCAATTGTCAGGACGACTT  | 6992  | AGG | 12 | 442 |
| AGGGTACGCGAAGGGCAAAA  | 18906 | AGG | 12 | 418 |
| CACAAATGATTTAGGGTAGG  | 38158 | TGG | 12 | 401 |
| AAAGATATTGTAAGTAGATA  | 15957 | TGG | 12 | 368 |
| CATTGATCATATAGTTGTAA  | 34987 | TGG | 12 | 340 |
| GGACATGAAGTTGCATTATA  | 38848 | CGG | 12 | 282 |
| TTAGTGAAAACAACTTTCT   | 33455 | AGG | 12 | 275 |
| GAGATTAAGTCACGTTGTAG  | 15492 | TGG | 12 | 273 |
| TACCTTGTGTTACGCGGTAT  | 17096 | GGG | 12 | 261 |
| CCGCCATGATTGCTTTTGC   | 36016 | TGG | 12 | 259 |
| GCATTCCTCGCTAGTTTAGA  | 14879 | TGG | 12 | 257 |
| CGATTCTATCGTTATTCATC  | 34592 | TGG | 12 | 254 |
| CGACTAAAGGAGGCAACCAA  | 29611 | TGG | 12 | 246 |
| GTTTTCCCGTCAAAGTATGG  | 38437 | TGG | 12 | 229 |
| AACTCTTCTTTAAATTTAAT  | 33428 | AGG | 12 | 226 |
| TGAATATCATAACAAGTTTG  | 25785 | TGG | 12 | 188 |
| ATATCACTGTTCCCTATGGCT | 25812 | TGG | 12 | 180 |
| TCGTCATGATTATGATTTTT  | 37213 | TGG | 12 | 177 |
| AAGAGAACGCAACAAAGAGC  | 11476 | TGG | 12 | 167 |
| TCCGAAAATGGCATTTCGGT  | 7173  | TGG | 12 | 156 |
| GGATCTAAGTCAGTTTCAGC  | 22166 | TGG | 12 | 140 |
| TAAGCGCAGTTAACACATCT  | 32351 | AGG | 12 | 114 |
| CCAAATCGTATCAAGTACAT  | 25934 | TGG | 12 | 113 |
| GCCTTTGGATACTCATTTTA  | 23608 | TGG | 12 | 108 |
| GTTAAATGGAATACAGCAGA  | 22533 | AGG | 12 | 81  |
| ATACACATGTAACAGAGAAA  | 138   | TGG | 12 | 73  |
| GTTTTAATGTCTTTAAAAGT  | 33731 | TGG | 12 | 56  |
| CCTGGTGCAAAGGTGAAGC   | 36809 | AGG | 12 | 51  |
| TTAGTGAAAACAACTTTCT   | 33455 | AGG | 12 | 39  |
| CTTTTTCACACCTTGCCAAT  | 10181 | TGG | 12 | 38  |
| GAAGAAAAAGAAAAGTGAAA  | 9068  | TGG | 12 | 34  |
| AACATTCACGTGATCCGTAC  | 9735  | TGG | 12 | 19  |
| GCGCACGCTTTCTTAGAAAG  | 35891 | TGG | 12 | 11  |
| TTTGAAAGCAGTGGCCAATT  | 5136  | TGG | 12 | 10  |
| AAATGATTCTGACATTGCAT  | 22287 | TGG | 11 | 924 |
| TTCTATGAACGTAATATCAA  | 15699 | CGG | 11 | 884 |
| ACGACTAATCTTGCAAGAGG  | 29069 | TGG | 11 | 701 |
| TGTAGACTTTTTAATAAAAAT | 27718 | TGG | 11 | 569 |
| GTA CTGGTGGCGTTGGTAAA | 31476 | TGG | 11 | 529 |
| ATACTTGCTGGTGCAACATT  | 15261 | AGG | 11 | 525 |
| TACAACATCGTCGATAATAA  | 36440 | GGG | 11 | 490 |

|                      |       |     |    |     |
|----------------------|-------|-----|----|-----|
| CCTAATATTCGACGATAGC  | 8573  | GGG | 11 | 479 |
| ACCGAATATGGCCAAAAGCG | 23165 | AGG | 11 | 477 |
| TGGACGATCACTCATGTTGA | 27884 | AGG | 11 | 471 |
| TCCTAAAATCCCTTTAAGCA | 34242 | TGG | 11 | 460 |
| GACGCAAAGCGCTTTTAATA | 30810 | GGG | 11 | 374 |
| ATTTTCAATAAGAAAAACAA | 31190 | CGG | 11 | 347 |
| CAGCCATATTTTGCTTTAAT | 32000 | TGG | 11 | 347 |
| AGGTTTAGTATGTGTGTATA | 16224 | TGG | 11 | 342 |
| GCTAAATGAAGATAGTTCTT | 27802 | TGG | 11 | 316 |
| AAAGTAATTGCTACAGACTT | 26510 | TGG | 11 | 303 |
| GTTTACACCAATAAATAGCT | 18426 | TGG | 11 | 290 |
| TAGAAATAGTGTTGATGATG | 16651 | AGG | 11 | 289 |
| TTAAATACTTTCACATCATT | 38497 | TGG | 11 | 277 |
| GACAAGTTTCAGAACGAACA | 17544 | AGG | 11 | 275 |
| ATAGATACTTCAGATAAGAA | 24634 | TGG | 11 | 243 |
| TGATATTGATGAGTATATCG | 17705 | AGG | 11 | 218 |
| GTCACCTGATAACTTTTATT | 37593 | AGG | 11 | 218 |
| TCAGCTAAGCGCATGCCATA | 9571  | AGG | 11 | 195 |
| GTGGTGTTTGGTTATTGTCA | 35274 | GGG | 11 | 171 |
| TTAAAACCCCTAACCTTACT | 6272  | AGG | 11 | 169 |
| CAGTTGTGACGTGGAAGGTT | 2598  | TGG | 11 | 165 |
| ACACCAGAAAACACATATAG | 2830  | AGG | 11 | 133 |
| ATGGCGTTGCGCAACCTGGT | 38549 | TGG | 11 | 128 |
| GTGCCTATATCCGTCTTTTC | 32388 | TGG | 11 | 114 |
| GTATCAAATGGATATACCTA | 30556 | TGG | 11 | 107 |
| TCTGATTAATATTTCTAAAT | 3009  | TGG | 11 | 105 |
| AAAAGAAATCGATGTAAAT  | 36631 | TGG | 11 | 104 |
| GTGCCAAACTGCGATGTCTC | 34612 | AGG | 11 | 102 |
| CGATATTTGATATTTAGAGG | 8827  | TGG | 11 | 96  |
| ACCGATAGGCACTGATAAAA | 29230 | CGG | 11 | 71  |
| TTATTTCAACAAATGAATGG | 6473  | TGG | 11 | 70  |
| ATTGAACAAGCGCAAGCTAA | 23405 | CGG | 11 | 49  |
| CACTACAGCATGGTCAATTG | 3164  | CGG | 11 | 41  |
| TGGAGTTTTAAAGGTGATGA | 21594 | CGG | 11 | 41  |
| ATAGGTATCAATGACAAACA | 36353 | AGG | 11 | 37  |
| TACTTACGTAATGCGAAAGG | 679   | TGG | 11 | 28  |
| TGAAGCAGTAGGGATTATGA | 11816 | CGG | 11 | 26  |
| TAACTACTACGACTTAAGC  | 21268 | AGG | 11 | 25  |
| TAGCTATAACATAAAAAAAT | 39779 | AGG | 11 | 22  |
| CATAAGATGACAGAGGCGAA | 32734 | TGG | 11 | 14  |
| AAAAGATTATGGCTTATATT | 38934 | GGG | 10 | 732 |
| ATAAACGAATTTGGCAAAGA | 11552 | TGG | 10 | 647 |
| ATACGCACTAGCACTTATAA | 11646 | CGG | 10 | 645 |
| AAAGCCTACAGCTAGTGAAG | 34408 | TGG | 10 | 630 |
| TCAAATGCTTGTGTCTTT   | 27102 | TGG | 10 | 548 |



|                       |       |     |    |     |
|-----------------------|-------|-----|----|-----|
| ATTGAACTTGATGAAGCAGT  | 11805 | AGG | 10 | 514 |
| AAGAATGACATTGAAATAGA  | 14834 | GGG | 10 | 503 |
| AAGCATAGAGGTGCGAAAAAG | 10878 | TGG | 10 | 494 |
| GCGTGTTTGATAACCTTTTT  | 36487 | AGG | 10 | 462 |
| CTAGCCAATTAGGGTGACGC  | 35163 | GGG | 10 | 441 |
| AACACGAGCACAAACGAGCT  | 35680 | CGG | 10 | 435 |
| GCTTTTTGCTTATCTGTCTT  | 5042  | CGG | 10 | 381 |
| AAACGTTCTTTCGGAAGAAT  | 24131 | TGG | 10 | 363 |
| TTAATAGGACGAGGTATAGA  | 15867 | TGG | 10 | 346 |
| AAAGAAGATTTTGAAACTGG  | 16457 | TGG | 10 | 343 |
| ATGCAGTAATGCAATCATT   | 30099 | TGG | 10 | 331 |
| AAAAAGAACGGGTAACTCC   | 9509  | TGG | 10 | 318 |
| CTGATGTTTGTGTCAATAAT  | 31578 | TGG | 10 | 299 |
| GAATTAGCTATCATAACTTC  | 1365  | TGG | 10 | 291 |
| AAAAGGTGTAGGCGCCTACT  | 19717 | GGG | 10 | 235 |
| CTGGATTTAACTAGAATAAC  | 25430 | TGG | 10 | 226 |
| AAAACATCCAGTGACATGCT  | 39871 | TGG | 10 | 200 |
| AAAAGGTATCTACTTCACAA  | 36196 | GGG | 10 | 185 |
| AATCGAACGCTTTCATGTT   | 26027 | TGG | 10 | 171 |
| GGAGAAGAAAGCAAGTGCAT  | 11497 | GGG | 10 | 128 |
| TTAATTAAGTTATCGATATC  | 9098  | CGG | 10 | 124 |
| TCACAACGTCATTGTGATG   | 2568  | AGG | 10 | 117 |
| ATTCTTAAGTTGTCTTTCAG  | 30455 | TGG | 10 | 103 |
| CAACACAAAGAAGTACATCA  | 13390 | AGG | 10 | 98  |
| GAGCCTTTATTTATATGAAA  | 17984 | TGG | 10 | 92  |
| TAACTTCTCAATTTAGAGCA  | 25068 | TGG | 10 | 71  |
| CGGATTAGTACCTGCAATAA  | 24340 | TGG | 10 | 70  |
| AAAAAGAGTACGTGGTGGCT  | 9541  | GGG | 10 | 63  |
| TTACCTATCAATTGTGCTAA  | 28396 | TGG | 10 | 62  |
| TTAAAGTGATTTAAAAACTG  | 6190  | AGG | 10 | 61  |
| TTACTTGATAGTTCTATTAT  | 577   | AGG | 10 | 53  |
| TCTGGATTTGTACCGGAACC  | 34610 | TGG | 10 | 40  |
| CCTAAGATTGGTCAGATATT  | 24965 | TGG | 10 | 30  |
| CGTGGATAAAAAGTTGATGAG | 5812  | AGG | 9  | 0   |
| CTTATACCGAGAAGATGGCA  | 8642  | CGG | 9  | 0   |
| TATGAAAATATAAGGGAGTG  | 12625 | TGG | 9  | 0   |
| ATACTTTGCTGGTGTGCGACT | 15818 | GGG | 9  | 0   |
| GGTGTCCCTGATTACATTAG  | 20886 | TGG | 9  | 0   |
| GAAAGATTACGGCGAGAAAA  | 24217 | TGG | 9  | 0   |
| TGTCCATAGCTTTCAAAAT   | 24879 | TGG | 9  | 0   |
| TACTACACCTTGAATCGCAC  | 25616 | CGG | 9  | 0   |
| TGGCGACTTCTCAGGTGCTT  | 25906 | GGG | 9  | 0   |
| TGCGCTTAAAACGCTATCTA  | 32320 | TGG | 9  | 0   |
| AGTCACAGGTGTAATGCTTG  | 33892 | AGG | 9  | 0   |
| CTTTATTTTTAAAAGATATT  | 34510 | GGG | 9  | 0   |

|                       |       |     |   |   |
|-----------------------|-------|-----|---|---|
| TTTTAGTCGTTTTTTTTATT  | 37834 | TGG | 9 | 0 |
| AAAAATCCACCAGTGCCAGC  | 39334 | AGG | 9 | 0 |
| AATCAAAAAATACAACCAAC  | 7597  | TGG | 8 | 0 |
| ATAACCAAATGTTCAAGAAA  | 9771  | TGG | 8 | 0 |
| TTAGCATATATTGATACGAA  | 16721 | TGG | 8 | 0 |
| GATTCCAGCAGATGGAAATT  | 24065 | AGG | 8 | 0 |
| AGAGTGGTGGATTCTGCCAT  | 28601 | AGG | 8 | 0 |
| CACTGGTGAAAAATATCCAG  | 33857 | AGG | 8 | 0 |
| TAATGTTTGGATTTACCAA   | 33944 | CGG | 8 | 0 |
| GCCAGTAATTGTTGAGTCAT  | 34865 | TGG | 8 | 0 |
| ATGAACGACACAAATGATTT  | 38150 | AGG | 8 | 0 |
| AAACCAACGTTTAATGATTG  | 4199  | GGG | 7 | 0 |
| GGCTCAGCAGGGTTTCAAGC  | 4695  | TGG | 7 | 0 |
| CTAATTTTGTAGCAGTATT   | 26082 | TGG | 7 | 0 |
| TGCTGGACGTTTTTATTTAA  | 27036 | GGG | 7 | 0 |
| AGTGCTGACGATATTGATAA  | 30518 | AGG | 7 | 0 |
| TCAACGGTATTGTTGACGG   | 33010 | TGG | 7 | 0 |
| CAAAGTCGAATATTGGTAAG  | 34440 | AGG | 7 | 0 |
| GCAAACGTCATTGCATAATC  | 35971 | AGG | 7 | 0 |
| CGACACAAATGATTTAGGGT  | 38155 | AGG | 7 | 0 |
| ATCGTATTTGAAAATGATGA  | 4779  | AGG | 6 | 0 |
| GAACAAGTAGGACAATCACA  | 25094 | AGG | 6 | 0 |
| AATGTTATGAATATCATACA  | 25778 | AGG | 6 | 0 |
| CGATGCGATTTTCATCAGCTT | 26413 | GGG | 6 | 0 |
| ACTTTCAAAGTATGGTAGTT  | 27229 | CGG | 6 | 0 |
| ACAGTTTTTACGACTAAAGG  | 29601 | AGG | 6 | 0 |
| GGTAAATGGAGTTTATTCGA  | 31490 | GGG | 6 | 0 |
| AATGAATTTTTAAAACATTC  | 31819 | AGG | 6 | 0 |
| TAAAGTAGTGCTACTTGTTT  | 33214 | TGG | 6 | 0 |
| GCTGTAGGCTTTCTAGTCTT  | 34381 | TGG | 6 | 0 |
| TACGTAATTGTTGTGTTGTT  | 39465 | GGG | 6 | 0 |
| GGACCTAGAAGAGAAAATTG  | 6598  | TGG | 5 | 0 |
| TATTCGACTAAAGGTAAGAG  | 14663 | TGG | 5 | 0 |
| GTGCTTTCACAAGTATTTCT  | 25485 | TGG | 5 | 0 |
| GTTGACTCAGACGGCAACGG  | 33184 | TGG | 5 | 0 |
| AGTTACTATAACTAAAATTA  | 33318 | TGG | 5 | 0 |
| AGTTTTATAACGGCTCAGCA  | 4684  | GGG | 4 | 0 |
| ATCACACTTATTGAGGAGCA  | 12816 | TGG | 4 | 0 |
| GTAGGCGATTCTGTAGATCA  | 21230 | GGG | 4 | 0 |
| CTGAGAATTTTTTCAGCTTTT | 22846 | CGG | 4 | 0 |
| TTATCACAAAAGGTTCTGAA  | 26178 | TGG | 4 | 0 |
| CGTAACTATTCTGATATAGA  | 26890 | GGG | 4 | 0 |
| ATTTTATTA AAAAGTCTACA | 27737 | GGG | 4 | 0 |
| CCCGAAAAAATCTCATACAT  | 35644 | GGG | 4 | 0 |
| AACAAAATACTTAAAGGAAA  | 35795 | AGG | 4 | 0 |

|                      |       |     |   |    |
|----------------------|-------|-----|---|----|
| ACTGCATACGGTGTTAATGT | 38905 | AGG | 4 | 0  |
| AATTTTGCTACATTAATTAT | 39660 | AGG | 4 | 0  |
| CTGTGGTTTTGTTGGTTGTA | 40162 | GGG | 4 | 0  |
| AAAGCAATTATGAAAAGAGT | 194   | AGG | 3 | 0  |
| AAAGCATAAAAAATGGTATT | 3048  | AGG | 3 | 0  |
| AGGGGTCCAAGTAGGTGTAA | 11371 | TGG | 3 | 0  |
| CTTACTACCTGCCTATATGG | 14408 | TGG | 3 | 0  |
| GATCAGAATTTTAAATCAAG | 18402 | TGG | 3 | 0  |
| CTAATTGTTCTCGAGTTGGT | 22993 | GGG | 3 | 0  |
| ATCGAAAGGAGGTTAGCCTT | 23593 | TGG | 3 | 0  |
| AATTGGGCTAATAGTGTGGC | 24896 | TGG | 3 | 0  |
| TAGGTGCTATAACTAAAATG | 27864 | TGG | 3 | 0  |
| ATAAATTCGGAACAACGAGC | 32705 | TGG | 3 | 0  |
| ATAACAAAAAACTAGCCCGA | 39803 | AGG | 3 | 0  |
| AAACATCCAGTGACATGCTT | 39870 | GGG | 3 | 0  |
| ATATGTATCGAGTGATGACA | 40072 | AGG | 3 | 0  |
| GAAAAATCGCCATCAATTCA | 454   | AGG | 2 | 0  |
| TAAACTTTTGAAATCTAAAA | 725   | TGG | 2 | 0  |
| GAATACTTAAATAAAAAAGC | 7390  | AGG | 2 | 0  |
| CCCCTAAAATGGCGGTTAA  | 23996 | AGG | 2 | 0  |
| TGGCGTATTTTGGGCTTTAA | 25333 | TGG | 2 | 0  |
| CTATCAATAAATTGTCCGTT | 30181 | GGG | 2 | 0  |
| CATCACTCAATTTATTCCAT | 30860 | CGG | 2 | 0  |
| AAACTTTAGATGCTATCCAG | 34085 | AGG | 2 | 0  |
| CTTCAATAACTAGCCAATTA | 35172 | GGG | 2 | 0  |
| AATCAATTCTTAGCGAATAA | 37925 | AGG | 2 | 0  |
| GAGGCCATGTATCTGACTGT | 40047 | TGG | 2 | 0  |
| GGCAACGCAGATTGTTTGAG | 2310  | TGG | 1 | 0  |
| CCACAAATAGAAATAGAGCT | 3698  | AGG | 1 | 0  |
| CTTTTTGGCAGTAAATTTGA | 7567  | GGG | 1 | 0  |
| TTTGATACAGCGGAAGAGCT | 10224 | CGG | 1 | 0  |
| ACTATTTCTAATGGCAAAGT | 16622 | TGG | 1 | 0  |
| TAGTAAACCTGTCTATATCA | 22045 | GGG | 1 | 0  |
| AAACACGCTGTACAAACAGG | 22374 | TGG | 1 | 0  |
| AGCCCAATTTTGGAAAGCTA | 24866 | TGG | 1 | 0  |
| TAGATTGGTTAACTCAATTG | 25653 | TGG | 1 | 0  |
| GAATATAACGTTACAGGCGC | 26860 | AGG | 1 | 0  |
| GATAGATTGCCTACAAACGA | 27325 | AGG | 1 | 0  |
| AACAGATGCGCCAGAAAAGA | 32394 | CGG | 1 | 0  |
| GAAATACATTTAGACGCAGC | 38986 | AGG | 1 | 0  |
| ATGACGTTAATCTGGAAAGA | 10685 | TGG | 0 | 10 |
| ACGTAATATCAACGGTATGT | 15707 | GGG | 0 | 10 |
| GACTGGGGTTACGAGCACTA | 15834 | TGG | 0 | 10 |
| ATTCATGACTTATCGTGAGT | 18578 | GGG | 0 | 10 |
| ACAGTTGAATACGAAAAATT | 22605 | CGG | 0 | 10 |

|                      |       |     |   |    |
|----------------------|-------|-----|---|----|
| TACTTTGCCGTTATTACAAG | 23069 | GGG | 0 | 10 |
| CATGCAAGTTTTAGGTGTTT | 25738 | TGG | 0 | 10 |
| TAGCTTAGGTAAAGGTTTAG | 26476 | CGG | 0 | 10 |
| TAACCGACACTTTCAAAGTA | 27237 | TGG | 0 | 10 |
| GGAGATAAAATAATCTTCGA | 27553 | CGG | 0 | 10 |
| AAATGTTATACCTTTATTAA | 28325 | AGG | 0 | 10 |
| ATGATGCAGGTATCTTATAT | 30618 | TGG | 0 | 10 |
| CGAAACCTTGTAAGTAGTTA | 30651 | GGG | 0 | 10 |
| ACGCAAAGCGCTTTAATAG  | 30811 | GGG | 0 | 10 |
| GTGCAATGTTTTTAAGAAT  | 30882 | TGG | 0 | 10 |
| AGTTTCTATGAATCAGATAG | 31615 | AGG | 0 | 10 |
| GACGGTGGCGCAAATGGTGT | 33025 | AGG | 0 | 10 |
| GATATTGGGGTTTTGTAACA | 34524 | TGG | 0 | 10 |
| CCCATGTATGAGATTTTTTC | 35628 | GGG | 0 | 10 |
| ACCTAGATTACATTTGTTTA | 36406 | TGG | 0 | 10 |
| CAGCTTTTTACCGCAAAGT  | 38406 | TGG | 0 | 10 |
| TTCCCTAACAACTTAAGCGT | 38638 | TGG | 0 | 10 |
| AAATAAAAAAGGGCAGAAAA | 79    | AGG | 0 | 9  |
| AAAATATCTCTTCCTTCTTG | 869   | AGG | 0 | 9  |
| GTTGGTGGTACTATGATTTT | 2793  | TGG | 0 | 9  |
| AGATGAAGGTAAGTATTTTA | 4979  | CGG | 0 | 9  |
| AACCGCAACTGTGTAATATG | 5622  | CGG | 0 | 9  |
| CAGCGACGAAAAGAAAATCA | 8732  | TGG | 0 | 9  |
| ATATCAGTATTTTGATGATG | 9319  | TGG | 0 | 9  |
| ATATTTAAGATGGAAGTTGA | 20685 | CGG | 0 | 9  |
| CAGGTGGACAGTTGCGTATA | 22390 | TGG | 0 | 9  |
| ATCTATTAGTTTACATAGAA | 22678 | TGG | 0 | 9  |
| CTCTTATCACCTTCGTTTGT | 27318 | AGG | 0 | 9  |
| GACTTGAATCGATTCCAGCC | 27630 | TGG | 0 | 9  |
| CCTATTTTAGGGTTAGCTTC | 28552 | TGG | 0 | 9  |
| ACTTTAAAGGTATTGCAGGT | 31356 | TGG | 0 | 9  |
| CAATTTTATGTTAGAACTT  | 31454 | TGG | 0 | 9  |
| AAATAATGCGCAAGGCGATT | 32778 | TGG | 0 | 9  |
| GGTAGCGTTGAAAGTTATGA | 32851 | GGG | 0 | 9  |
| GATTAATATAGATAATTATC | 34462 | GGG | 0 | 9  |
| AATGGTTTGACAATTCATTA | 38216 | GGG | 0 | 9  |
| TTAATAGCCGGTGCGATTCA | 39256 | TGG | 0 | 9  |
| AAGGGCAGATTATTTGAAAA | 40253 | AGG | 0 | 9  |
| AACAACCCTCCTCATCAAA  | 2575  | TGG | 0 | 8  |
| AAGATAAAGCGTTATTATAT | 5590  | TGG | 0 | 8  |
| AAAGTTTACTTATTGTTTCT | 6095  | AGG | 0 | 8  |
| TAACTTTATCCACATAAAGG | 6707  | TGG | 0 | 8  |
| TTTTTCACACCTTGCCAATC | 10181 | TGG | 0 | 8  |
| TAGCTCCTGCACAAGATGTA | 14491 | GGG | 0 | 8  |
| GAAATTGTTGATACACGTGT | 16538 | TGG | 0 | 8  |

|                        |       |     |   |   |
|------------------------|-------|-----|---|---|
| CAATGGACTTTACATTTGAA   | 19451 | GGG | 0 | 8 |
| AAAGAAATCGTTAGCACTAA   | 20218 | TGG | 0 | 8 |
| CAGTCTTGTTCGGTTACAAAG  | 20547 | AGG | 0 | 8 |
| GGTACTGGTATATATGCTAC   | 21540 | TGG | 0 | 8 |
| TAAAGGTGATGACGGCGAA    | 21601 | TGG | 0 | 8 |
| TTAGCTGAAATAGTACGAGG   | 22263 | CGG | 0 | 8 |
| AGTGCTAACAATTCATGTTC   | 23296 | AGG | 0 | 8 |
| TCATTTTATGGCAAAGATTA   | 23620 | TGG | 0 | 8 |
| CGCACGCAAGTTTGAGGATT   | 24688 | GGG | 0 | 8 |
| AATGTAACGATTAGAAATGA   | 26663 | GGG | 0 | 8 |
| AAAGTTTATGGTGATTTTGA   | 28343 | TGG | 0 | 8 |
| GAAGCGCCACCGCTTGTTGA   | 28439 | TGG | 0 | 8 |
| GATACATTGATGGAGAATTA   | 30264 | TGG | 0 | 8 |
| GCGCCAGAAAAGACGGATAT   | 32401 | AGG | 0 | 8 |
| CTGTAGGCTTTCTAGTCTTT   | 34380 | GGG | 0 | 8 |
| ATGGGGCAATGCTAAGGATA   | 34543 | TGG | 0 | 8 |
| TTGCTAGTATCTTTTGAATA   | 34807 | TGG | 0 | 8 |
| ACTAGCCAATTAGGGTGACG   | 35164 | CGG | 0 | 8 |
| ATCAACTTTAGTAATCCTTC   | 37735 | AGG | 0 | 8 |
| AAAGCAAAGATTGAAAAATA   | 38362 | TGG | 0 | 8 |
| ACCGCTCTATATTTAACGGC   | 6388  | AGG | 0 | 7 |
| GTTTTCGGAAAACGGAAAAA   | 7233  | CGG | 0 | 7 |
| ATCTCTTAGAGCCGAAAAAT   | 10081 | TGG | 0 | 7 |
| TATAACAATTGCTTGTTGGT   | 12250 | CGG | 0 | 7 |
| ATCGATGAGAACATCTAATG   | 14318 | TGG | 0 | 7 |
| AAGCAAGAAAAGTTTGTGCT   | 14594 | AGG | 0 | 7 |
| AGGCCTTTGAAGAATATGAG   | 14796 | TGG | 0 | 7 |
| TTAAGAAACTCTTTTGATAA   | 19804 | CGG | 0 | 7 |
| CTTCCAATAGAAATAGTGTG   | 20983 | AGG | 0 | 7 |
| GCATTAGCTCCTGTTGACTT   | 21423 | AGG | 0 | 7 |
| ATATATGCTACTGGTCCTGG   | 21549 | TGG | 0 | 7 |
| TGTAAACTAATAGATCAAGG   | 22702 | GGG | 0 | 7 |
| AGAGAATTACAAGGAAATCA   | 23225 | TGG | 0 | 7 |
| AGAAAATTCCTTGAATCGAA   | 23579 | AGG | 0 | 7 |
| GGTATTA AAAACAGCAGTTTC | 25613 | CGG | 0 | 7 |
| TGCGCACAAGTAGTCAGCG    | 26386 | CGG | 0 | 7 |
| CTTTTTAATAAAAATTGGCAT  | 27712 | AGG | 0 | 7 |
| GGAGACTTCCAAGAAGCTGA   | 30758 | GGG | 0 | 7 |
| GCAGTTTGGCACCTGGCAA    | 34640 | CGG | 0 | 7 |
| AAAGGTGATAAAGGCGAACC   | 36782 | GGG | 0 | 7 |
| GCAGGTAAAAAAGGAGAACA   | 36827 | AGG | 0 | 7 |
| GAATATACAAAAGTATATGC   | 37471 | TGG | 0 | 7 |
| TGGCGTTGCGCAACCTGGTT   | 38550 | GGG | 0 | 7 |
| GATGTTATTA AAAATAACTT  | 39082 | AGG | 0 | 7 |
| ACCACAGATCCTATTAATTT   | 40194 | AGG | 0 | 7 |

|                      |       |     |   |   |
|----------------------|-------|-----|---|---|
| AATAAATACCATTTATTACC | 829   | GGG | 0 | 6 |
| TTAATTATGCTCGTAAGAAT | 1241  | CGG | 0 | 6 |
| TTTGAGTGGTTACGTCAAAA | 2324  | CGG | 0 | 6 |
| ACCAACCGAAATGCCATTTT | 7188  | CGG | 0 | 6 |
| AAACGATTCAAAGGCGCTCA | 8769  | CGG | 0 | 6 |
| CTCTAAGAGATATCTGTATC | 10109 | AGG | 0 | 6 |
| TTTTCAATATCAACTATGAA | 10483 | GGG | 0 | 6 |
| CATAGAGGTCGAAAAAGTGG | 10881 | AGG | 0 | 6 |
| AGCAACGTGATGAGCTTATT | 11439 | GGG | 0 | 6 |
| TCATCAAGTTGTACGTCTAA | 12036 | CGG | 0 | 6 |
| ATCGAGTCAAGGAGGTTTTG | 12423 | GGG | 0 | 6 |
| CTAAATTCAGTGATGTATTC | 15995 | AGG | 0 | 6 |
| TCATTCTGATTGGTTATTTT | 17669 | GGG | 0 | 6 |
| CACTCACGATAAGTCATGAA | 18560 | TGG | 0 | 6 |
| TTTTCTTTTGCTGTCAT    | 19663 | TGG | 0 | 6 |
| GCTTAAACCAACTGAATAGG | 20434 | AGG | 0 | 6 |
| TTGATATTGATTCCAGCAGA | 24057 | TGG | 0 | 6 |
| AAAGAATTCATGAAGTCGA  | 24101 | AGG | 0 | 6 |
| GTCGCAGGCTTGGAGTTGT  | 24425 | TGG | 0 | 6 |
| CGATAATTTGAGCGACTGCT | 25275 | GGG | 0 | 6 |
| TATCACAAAAGGTTCTGAAT | 26179 | GGG | 0 | 6 |
| CACTAAGTCGTTATATCCTA | 28601 | TGG | 0 | 6 |
| AGCCATACAATCCAGCTTTT | 29499 | AGG | 0 | 6 |
| GTTTACATTCAATGACAGGT | 29652 | CGG | 0 | 6 |
| AATTCCGGTTCTTGCTCTTT | 30034 | TGG | 0 | 6 |
| GCCAACCCTAACTACTTACA | 30662 | AGG | 0 | 6 |
| GATTTAGTTAGTGGGTTTGA | 31927 | TGG | 0 | 6 |
| AGAAAGTTTGTTTTACTAA  | 33474 | CGG | 0 | 6 |
| CCCTGGCAACGGAATAGGTT | 34651 | CGG | 0 | 6 |
| TAAAAATAACTTTTATTAGA | 34684 | TGG | 0 | 6 |
| AACCTTTTTAGGTATCTTGT | 36476 | AGG | 0 | 6 |
| AAGAATGAAAGTAGATTTAA | 36755 | AGG | 0 | 6 |
| CCTGTCCAAATTTTAACCGT | 37312 | CGG | 0 | 6 |
| ACATGTCTTGTCACAGTTTC | 38559 | AGG | 0 | 6 |
| CTTATATTGGGTTAAATCAC | 38946 | AGG | 0 | 6 |
| GACAAGGAAGATGTCTCCTG | 40056 | TGG | 0 | 6 |
| GGTTTACCATCATACAAGGA | 40368 | TGG | 0 | 6 |
| GCAAAAGCAGTCAAAGCTAA | 8092  | AGG | 0 | 5 |
| GGAACAGCAGACGCAGGAAA | 12379 | AGG | 0 | 5 |
| AAAATCGGAAGGTTTCCGGA | 14721 | AGG | 0 | 5 |
| TTAGCATACCTTGTGTTACG | 17090 | CGG | 0 | 5 |
| ATCATTCTGATTGGTTATTT | 17670 | TGG | 0 | 5 |
| AATCTATCAACTAAGGATGT | 19287 | TGG | 0 | 5 |
| TGTAAAGTCCATTGAAGAAA | 19476 | TGG | 0 | 5 |
| TGAAGAAGAAATATTTAAGA | 20675 | TGG | 0 | 5 |

|                      |       |     |   |   |
|----------------------|-------|-----|---|---|
| AAACAATTTATTTGAGTATG | 21190 | AGG | 0 | 5 |
| GAGCGTAATAAACGTGCAGA | 22419 | CGG | 0 | 5 |
| TTCTCAGAAGATAGCGAAGA | 22878 | TGG | 0 | 5 |
| GCTTAGTACAAGCTTCTAAG | 23427 | AGG | 0 | 5 |
| AGATGCAAACCCCGCTAAAA | 23986 | TGG | 0 | 5 |
| CCGCTAAAATGGCGGTTAAA | 23997 | GGG | 0 | 5 |
| CTGGCGACTTCTCAGGTGCT | 25905 | TGG | 0 | 5 |
| CCAATGTACTTGATACGATT | 25950 | TGG | 0 | 5 |
| GATAGATTGCTTGTTAAAAA | 30215 | CGG | 0 | 5 |
| ATAGCTTCTGGGCGTGCTTC | 34282 | TGG | 0 | 5 |
| GCTAATTACAGATATCCTAA | 34565 | GGG | 0 | 5 |
| TTATAGCGTTGACCAAAACT | 34720 | GGG | 0 | 5 |
| CGGATATTTATTTTTAGGTA | 37522 | AGG | 0 | 5 |
| GTCGTTTTCCCGTCAAAGTA | 38434 | TGG | 0 | 5 |
| GTCGTCGAGTTGTAGCTCGG | 1048  | CGG | 0 | 4 |
| ATGATGTCAGGTACAGAAAA | 2060  | AGG | 0 | 4 |
| CAACTGCCATTGTGATGAGG | 2565  | AGG | 0 | 4 |
| GAATACTTAAACCAATTTTT | 10086 | CGG | 0 | 4 |
| TAAATGGGCGCGAGAAAATC | 10366 | CGG | 0 | 4 |
| ATACAAGCTAGGTAAAAGT  | 13537 | AGG | 0 | 4 |
| TGATTACGAATTAGACGAAA | 17596 | TGG | 0 | 4 |
| TCTTCTGCGCCTTCAACAAG | 19951 | CGG | 0 | 4 |
| AAGATTCCGTGGAGTTTTAA | 21585 | AGG | 0 | 4 |
| CTTTAACCGCCATTTTAGCG | 23979 | GGG | 0 | 4 |
| ATCAGTTACGTTCAAGAGAA | 25130 | TGG | 0 | 4 |
| GTATTTTAGGTGGCGTATTT | 25323 | TGG | 0 | 4 |
| ACTTCATTGTAAGTGGACA  | 26444 | CGG | 0 | 4 |
| GATATAGAAGTAATAAGGAA | 26782 | TGG | 0 | 4 |
| GACGTCCAAGCACTATTTGC | 27019 | TGG | 0 | 4 |
| ACAACAGACTTTTGCAGAAG | 28366 | CGG | 0 | 4 |
| AAAATCATTAATTTTCTAC  | 30415 | CGG | 0 | 4 |
| ATAGGCACGTTAGAGAAGCC | 32419 | TGG | 0 | 4 |
| CCGTTTTATAAAAAGAATGA | 32611 | TGG | 0 | 4 |
| TAATAGTTGGACAGGTTCTC | 34750 | CGG | 0 | 4 |
| TGGCTAGTTATTGAAGTATG | 35195 | TGG | 0 | 4 |
| TCAATATCGCAAATGTTGAA | 36960 | GGG | 0 | 4 |
| TACACACATAAGTTTATTGG | 234   | CGG | 0 | 3 |
| TATTCATACCGTCATTCTTT | 6359  | GGG | 0 | 3 |
| CTTTCAACATATTTTTCAA  | 12695 | AGG | 0 | 3 |
| AACGTTGCCGAAACCACAAG | 13943 | GGG | 0 | 3 |
| AACCAATGCTCGGGATGGTC | 15530 | AGG | 0 | 3 |
| CATTTCTTTGCCTCGCTTT  | 23160 | TGG | 0 | 3 |
| AGCCAATCACGCCATTCAGC | 23323 | AGG | 0 | 3 |
| GAAGTTTCAACTTATTATAA | 26736 | GGG | 0 | 3 |
| GTAATAACGACCCTGAAAAA | 27293 | TGG | 0 | 3 |

|                       |       |     |   |   |
|-----------------------|-------|-----|---|---|
| CTACTATTGGCGAAAAAATA  | 27951 | AGG | 0 | 3 |
| TTTATCTATAAATAATGAAT  | 28837 | TGG | 0 | 3 |
| GACGCGGTATTGATAATAC   | 29897 | AGG | 0 | 3 |
| AAAGTAGGTGGCGTAATGTT  | 33931 | TGG | 0 | 3 |
| GACATCGCAGTTTGGCACCC  | 34634 | TGG | 0 | 3 |
| AGCCTGTAACACTTACATAA  | 34773 | GGG | 0 | 3 |
| GCTCCGCCACCATACTTTGA  | 38427 | CGG | 0 | 3 |
| TTGTATTCTAAATTAATAGC  | 39244 | CGG | 0 | 3 |
| ACAGGAGAGGTAGACAAGGC  | 39580 | AGG | 0 | 3 |
| AACCAAGCTATGTTGATAGA  | 376   | GGG | 0 | 2 |
| TTTTTGATGTCTATTACCCA  | 6034  | GGG | 0 | 2 |
| ATGGAATCAAGATTTTAGGT  | 7464  | TGG | 0 | 2 |
| ATGGCGCTTACTTTTAC     | 10165 | GGG | 0 | 2 |
| ATATGACGATGACGTTAATC  | 10677 | TGG | 0 | 2 |
| AATCTGGAAAGATGGGGAGT  | 10693 | TGG | 0 | 2 |
| CATACAAAAGAAAATGAAA   | 12338 | AGG | 0 | 2 |
| CATATTCTTCAAAGGCCTTT  | 14775 | TGG | 0 | 2 |
| AAGCTCATTTTAAGCGCGAT  | 21963 | AGG | 0 | 2 |
| GATTTAGCTGAAATAGTACG  | 22260 | AGG | 0 | 2 |
| CCACACTATTAGCCCAATTT  | 24876 | TGG | 0 | 2 |
| TCATTCGTAAGTGGACACGG  | 26447 | TGG | 0 | 2 |
| AATGCTTTTAGTTCTTTAGA  | 28777 | TGG | 0 | 2 |
| AAACGACGTATCGATATTGG  | 30716 | CGG | 0 | 2 |
| ATTAAGTGGTACGTAGACAT  | 33804 | GGG | 0 | 2 |
| GATTTTAGGATATAGCTTCT  | 34271 | GGG | 0 | 2 |
| TCTTAGGATTCCATCTAATT  | 36090 | CGG | 0 | 2 |
| CAAGGCGCACCCGGTAAAAA  | 36845 | CGG | 0 | 2 |
| ATTTGCCACATTTTAGTGTC  | 36871 | AGG | 0 | 2 |
| GCAGGAGAAAGCGCAAGTGG  | 39004 | TGG | 0 | 2 |
| GAACCAAGCTATGTTGATAG  | 377   | AGG | 0 | 1 |
| GGCGATTTTTCTCCTAGTT   | 482   | CGG | 0 | 1 |
| AGAAAAACAAGGTATGACTT  | 489   | TGG | 0 | 1 |
| AATACCATTTATTACCGGGT  | 825   | AGG | 0 | 1 |
| AAAAAGAAAGTTTTAACTTA  | 927   | AGG | 0 | 1 |
| TTGGTCGTCGAGTTGTAGCT  | 1051  | CGG | 0 | 1 |
| TTGTTATCAAATATTTAAGG  | 1710  | TGG | 0 | 1 |
| ATGTTGTTATCAAATATTTA  | 1713  | AGG | 0 | 1 |
| AATATTCAAGAAAAAGAAAA  | 1835  | TGG | 0 | 1 |
| GCATCTGCAAATACAATTTT  | 2197  | TGG | 0 | 1 |
| AGAAACATCAATCACACATT  | 2425  | CGG | 0 | 1 |
| TGTCCTTTACCTGTTACTTT  | 2458  | TGG | 0 | 1 |
| AAAACAAACAACCTTAATAGG | 2527  | AGG | 0 | 1 |
| GTAGAATTTTCAGCATCTTT  | 2686  | CGG | 0 | 1 |
| AACAATTGATGGATTTGTGT  | 2871  | AGG | 0 | 1 |
| CTACACCTAAATTATCTTTG  | 2936  | CGG | 0 | 1 |



|                       |       |     |   |   |
|-----------------------|-------|-----|---|---|
| ATATTAATCAGAGTGCCTGT  | 2982  | TGG | 0 | 1 |
| CTTAGTCATGAAATGGTAGG  | 3576  | AGG | 0 | 1 |
| GTCATTGACATTAACGAAGG  | 3983  | TGG | 0 | 1 |
| AACAAAGATAAAGATGATGA  | 4319  | AGG | 0 | 1 |
| ATTTGCAAATCCTAGCATT   | 4552  | CGG | 0 | 1 |
| AGATTTAGCGTTTTAAGGTG  | 5171  | TGG | 0 | 1 |
| AGAGATATAGAACTTCACTG  | 5385  | GGG | 0 | 1 |
| CATTATGAAGCAGTCGGCAG  | 5667  | AGG | 0 | 1 |
| AATACCACTTGCATGACTCG  | 5794  | TGG | 0 | 1 |
| TAGGTTATTAATTGAAATTT  | 6291  | CGG | 0 | 1 |
| ATATTCATACCGTCATTCTT  | 6358  | TGG | 0 | 1 |
| TTTAGAACGATAAAAAGAAAG | 6907  | TGG | 0 | 1 |
| TCCTAAGTCGTCCTGACAAT  | 7007  | TGG | 0 | 1 |
| GAAAACGGATTATCGGCAAA  | 7210  | CGG | 0 | 1 |
| ATTATCGGCAAACGGGTTTT  | 7218  | CGG | 0 | 1 |
| GGAAAAACGGAAAACCGAAA  | 7246  | AGG | 0 | 1 |
| GAAAACGGAAAACCGAAA    | 7247  | GGG | 0 | 1 |
| ACTTTTTGGCAGTAAATTTG  | 7566  | AGG | 0 | 1 |
| ACGAAAGTTATTGGGATTAG  | 7649  | GGG | 0 | 1 |
| AGCATTGTTGATAACAGAGT  | 8290  | AGG | 0 | 1 |
| AGATGGCACGGAAGATATTA  | 8654  | AGG | 0 | 1 |
| CGTCCACGCTTTCGTAATAC  | 8907  | AGG | 0 | 1 |
| ACGCATGTAATGGTCATGTG  | 9148  | TGG | 0 | 1 |
| ATGAGTGTCGTGAAGATTAA  | 9446  | CGG | 0 | 1 |
| AATGAATTGATAAAAAGAA   | 9497  | CGG | 0 | 1 |
| ATGGTTGCAAAAAGAGTACG  | 9533  | TGG | 0 | 1 |
| AAGAGGTTGAACTACGTAAG  | 9684  | AGG | 0 | 1 |
| TAGATAGAGTGTTTGACTTG  | 10031 | TGG | 0 | 1 |
| TAACTTTATTTTAGAGGAGA  | 10294 | TGG | 0 | 1 |
| ATTAGACGAGTTAATTAAT   | 10351 | GGG | 0 | 1 |
| ACTATGAAGGGGATATCAAT  | 10471 | TGG | 0 | 1 |
| GAAATGTACGAGATGGAAGG  | 10559 | AGG | 0 | 1 |
| ACTAGTGTTTGCATATAATA  | 10577 | CGG | 0 | 1 |
| TCTATGCTTGCAGTTTGAA   | 10848 | CGG | 0 | 1 |
| AACAACAACGAAATATATGC  | 11088 | GGG | 0 | 1 |
| CTCACAGTCATATCTAAGGA  | 11271 | AGG | 0 | 1 |
| AAAGATTTAATAAACGAATT  | 11543 | TGG | 0 | 1 |
| GAAGCAGTAGGGATTATGAC  | 11817 | GGG | 0 | 1 |
| ATAACAATTGCTTGTTGGTC  | 12249 | GGG | 0 | 1 |
| AGACATATTAGATCGAGTCA  | 12412 | AGG | 0 | 1 |
| AGATCGAGTCAAGGAGGTTT  | 12421 | TGG | 0 | 1 |
| CTAAAGCTAAGAGTAATCAA  | 12509 | AGG | 0 | 1 |
| AGAAGCGAAAGAGAAGTACG  | 12561 | AGG | 0 | 1 |
| TCACACTTATTGAGGAGCAT  | 12817 | GGG | 0 | 1 |
| TTAACGATAGAAAAAGATTA  | 12956 | TGG | 0 | 1 |

|                       |       |     |   |   |
|-----------------------|-------|-----|---|---|
| CATATCGCCTATATACACAG  | 13359 | TGG | 0 | 1 |
| AACACAAAGAAGTACATCAA  | 13391 | GGG | 0 | 1 |
| GACGGCTAATGATGATGTAG  | 13736 | AGG | 0 | 1 |
| GCGATCAGTCTGATTTGATG  | 13783 | AGG | 0 | 1 |
| CAACGTTGCCGAAACCACAA  | 13942 | GGG | 0 | 1 |
| AATCAATCGCAACAGAGATT  | 14055 | GGG | 0 | 1 |
| AGCTCCTGCACAAGATGTAG  | 14492 | GGG | 0 | 1 |
| TTCGACTAAAGGTAAGAGTG  | 14665 | GGG | 0 | 1 |
| TTTAAAAATCGGAAGGTTTC  | 14717 | CGG | 0 | 1 |
| AAGTAGCTGAACAATCAAAA  | 14763 | TGG | 0 | 1 |
| ACAGGTCACAGTAAAGTAAG  | 15390 | TGG | 0 | 1 |
| CCAGCAAAGTATTCTTTGAT  | 15791 | AGG | 0 | 1 |
| CCTATCAAAGAATACTTTGC  | 15807 | TGG | 0 | 1 |
| AATACTTTGCTGGTGTGAC   | 15817 | TGG | 0 | 1 |
| CTAAACCTGAACGATTAAGG  | 16255 | AGG | 0 | 1 |
| TAAACCTGAACGATTAAGGA  | 16256 | GGG | 0 | 1 |
| AACCTGAACGATTAAGGAGG  | 16258 | GGG | 0 | 1 |
| ATAGATGATATTGAAGCACA  | 16301 | AGG | 0 | 1 |
| ATTGACGCTTTGCAAGAAGT  | 16919 | TGG | 0 | 1 |
| TGGAATGAACTTAACTTA    | 17323 | TGG | 0 | 1 |
| CAAGTGCTAATTAACCTGAA  | 17522 | GGG | 0 | 1 |
| CAAGGTATTATGAGTGGAGA  | 18153 | GGG | 0 | 1 |
| TAAAGCTCAATCATTGCGTG  | 18221 | TGG | 0 | 1 |
| GGCAGAGCAATGTCACAAGC  | 18258 | TGG | 0 | 1 |
| GCAATGGTTGCTAAAGATAA  | 18291 | CGG | 0 | 1 |
| ATACTCATCGTCATTTAGAT  | 18364 | GGG | 0 | 1 |
| CAGGCGCCAAGCTATTTAT   | 18435 | TGG | 0 | 1 |
| ACTCACGATAAGTCATGAAT  | 18559 | GGG | 0 | 1 |
| CGAAAAGGTGGTAATTGATA  | 18612 | TGG | 0 | 1 |
| AGCAGTTTAAACGACATGCTA | 18841 | AGG | 0 | 1 |
| ATGCACTTTTCGGACTIONA  | 18887 | GGG | 0 | 1 |
| AGAAGTAAAAGATTATCTAA  | 18990 | AGG | 0 | 1 |
| ATTCGAAAGGATTAGAATCA  | 19103 | TGG | 0 | 1 |
| TAAAGTGAGGTAATAAAAATA | 19522 | TGG | 0 | 1 |
| ACATTGCCTGGCGTGTATGT  | 19534 | TGG | 0 | 1 |
| ATTTTATCGGATTTTAAAAA  | 19574 | CGG | 0 | 1 |
| AAATTTACTTACTTAGCAAA  | 19700 | AGG | 0 | 1 |
| TAGTACCAAAGATAACAGCT  | 19896 | TGG | 0 | 1 |
| CGTGTAGTTAATACTCCGTT  | 20059 | TGG | 0 | 1 |
| GCTAACGGGAACGAGATTAT  | 20156 | GGG | 0 | 1 |
| TCCGCTCCAGTATAAGATAG  | 20167 | TGG | 0 | 1 |
| ACCACTATCTTATACTGGAG  | 20182 | CGG | 0 | 1 |
| CGTTAGCACTAATGGGTGAT  | 20226 | TGG | 0 | 1 |
| GACTATTACTIONTACAAAGA | 20508 | AGG | 0 | 1 |
| AAACTTTTACTCAAGAAAAA  | 20634 | TGG | 0 | 1 |

|                        |       |     |   |   |
|------------------------|-------|-----|---|---|
| AACAATGATTTTATGAAAGA   | 20736 | TGG | 0 | 1 |
| CAGGTCGTTGATAAATACTCT  | 20788 | AGG | 0 | 1 |
| ATACTCCACTAATGTAATCA   | 20875 | GGG | 0 | 1 |
| ACATTAGTGGAGTATTAAC    | 20899 | AGG | 0 | 1 |
| TTCCAATAGAAATAGTGTGA   | 20982 | GGG | 0 | 1 |
| CGACTTAAGCAGGTGCCATA   | 21278 | TGG | 0 | 1 |
| CATATGGCAAAAAGTTAAGTA  | 21294 | CGG | 0 | 1 |
| ATTGACTTTAAATATTTTCTGA | 21462 | TGG | 0 | 1 |
| GACTTTAAATATTTTCGATGG  | 21465 | TGG | 0 | 1 |
| GTCGTGCTACAAAGATTCCG   | 21574 | TGG | 0 | 1 |
| GCAGGGTTCCAAAATGGCTG   | 21629 | TGG | 0 | 1 |
| AGCAGTATTTTTCATAGAGG   | 21694 | TGG | 0 | 1 |
| GCTAATAATAAAGATTCTAC   | 22187 | TGG | 0 | 1 |
| TTAGCTGACTTACAAGAAGG   | 22221 | TGG | 0 | 1 |
| AATAGTACGAGGCGGTAAAA   | 22271 | CGG | 0 | 1 |
| ATGTAAACTAATAGATCAAG   | 22701 | GGG | 0 | 1 |
| GATAGCGAAGATGGGAGAAA   | 22887 | AGG | 0 | 1 |
| TCTAATTGTTCTCGAGTTGG   | 22994 | TGG | 0 | 1 |
| ATACTTTGCCGTTATTACAA   | 23068 | GGG | 0 | 1 |
| ACAATAGTGGTTTTTTCAAG   | 23107 | AGG | 0 | 1 |
| AATGATGAAAGAGAATTACA   | 23216 | AGG | 0 | 1 |
| GAATGGCGTGATTGGCTTAT   | 23345 | TGG | 0 | 1 |
| TGGCGTGATTGGCTTATTGG   | 23348 | TGG | 0 | 1 |
| AAATTCCTTGAATCGAAAGG   | 23582 | AGG | 0 | 1 |
| GCCATAAAATGAGTATCCAA   | 23593 | AGG | 0 | 1 |
| CTAAAGCTACTGTCGAAGCT   | 23937 | TGG | 0 | 1 |
| CCCTTTAACCGCCATTTTAG   | 23981 | CGG | 0 | 1 |
| GGAGCAGTTAAACGTTCTTT   | 24122 | CGG | 0 | 1 |
| ATTATGAGAAAAGAAGTAAA   | 24158 | TGG | 0 | 1 |
| AATGGAACAAGTGATATTTG   | 24176 | GGG | 0 | 1 |
| AGTTCGGATTTTAGTAGCTA   | 24227 | AGG | 0 | 1 |
| GCTACTAAAATCCGAACTTT   | 24248 | CGG | 0 | 1 |
| CGGTAATCTTCGCGCAAC     | 24268 | AGG | 0 | 1 |
| CATTATTGCAGGTAATAATC   | 24323 | CGG | 0 | 1 |
| AATAATGGCAGTACTTAATG   | 24355 | CGG | 0 | 1 |
| GGTGGCGTTTTAGGTTTAGT   | 24392 | TGG | 0 | 1 |
| AGTTGTTGGCTTTGGTGCAA   | 24439 | TGG | 0 | 1 |
| GGCTATTAGCGCTCTAAAA    | 24460 | TGG | 0 | 1 |
| ACGCACGCAAGTTTGAGGAT   | 24687 | TGG | 0 | 1 |
| GAAGCATTGAATAGCATAGG   | 24743 | TGG | 0 | 1 |
| GATTTTCGTTACTAATTTAGC  | 25241 | TGG | 0 | 1 |
| GGTGTTATCGGTATTTTAGG   | 25313 | TGG | 0 | 1 |
| GGATTTAACTAGAATAACTG   | 25432 | GGG | 0 | 1 |
| AGATTGGTTAACTCAATTGT   | 25654 | GGG | 0 | 1 |
| GATTGGTTAACTCAATTGTG   | 25655 | GGG | 0 | 1 |

|                       |       |     |   |   |
|-----------------------|-------|-----|---|---|
| CAAGTATTCATGCAAGTTTT  | 25730 | AGG | 0 | 1 |
| TACTATGATTTGGACAGCTA  | 25835 | CGG | 0 | 1 |
| TTGGAGTGTGGCTGAAAAAA  | 26137 | TGG | 0 | 1 |
| TGGAGTGTGGCTGAAAAAAT  | 26138 | GGG | 0 | 1 |
| TTCGCGAGTAAAGTAGCTGA  | 26231 | TGG | 0 | 1 |
| TCGCGAGTAAAGTAGCTGAT  | 26232 | GGG | 0 | 1 |
| TTAATCGGCAAAGTAGCTGA  | 26351 | GGG | 0 | 1 |
| TCTGTAACCTTCATTCGTAAG | 26438 | TGG | 0 | 1 |
| TGACACAACACAAACATCAG  | 27198 | GGG | 0 | 1 |
| CTACCATACTTTGAAAGTGT  | 27250 | CGG | 0 | 1 |
| TCAGGAGAAGTTTATTATAA  | 27385 | CGG | 0 | 1 |
| AAGGAAGTTGATTTAAAAGC  | 27532 | CGG | 0 | 1 |
| CACAAATTATATTTTAGATA  | 27700 | AGG | 0 | 1 |
| TAAAAAGTCTACAGGGTGTA  | 27744 | GGG | 0 | 1 |
| GCGAGTACGTTTGACGCAAT  | 27845 | AGG | 0 | 1 |
| CAATACTGTCTTTAAAGGAA  | 28069 | CGG | 0 | 1 |
| AATTTAGATGCATCTACTTT  | 28096 | TGG | 0 | 1 |
| AGTAGATGCATCTAAATTCG  | 28117 | AGG | 0 | 1 |
| GTAGATGCATCTAAATTCGA  | 28118 | GGG | 0 | 1 |
| GCATCTAAATTCGAGGGATT  | 28124 | AGG | 0 | 1 |
| TATACCTTTATTAAAGGTTA  | 28331 | TGG | 0 | 1 |
| ATTGGCGACTCTGTAGCTAG  | 28991 | AGG | 0 | 1 |
| TTGGCGACTCTGTAGCTAGA  | 28992 | GGG | 0 | 1 |
| TGCAAGAGGTGGCGCAACAA  | 29080 | TGG | 0 | 1 |
| AGTTCCAATAGGTAAAGAAG  | 29107 | CGG | 0 | 1 |
| ACTGATGATGATTGGTTACA  | 29192 | CGG | 0 | 1 |
| ATCACTAGTATTTTTGAATC  | 29296 | TGG | 0 | 1 |
| ACACGGACAAAAACAACTA   | 29385 | GGG | 0 | 1 |
| ATGCTCGCTTTCCTAAAAGC  | 29494 | TGG | 0 | 1 |
| CCTCGTGACCTTTTTCGTTA  | 29532 | GGG | 0 | 1 |
| CCCTAACGAAAAAGGTCACG  | 29548 | AGG | 0 | 1 |
| GATTATTTAACGTATTTAAA  | 29819 | TGG | 0 | 1 |
| CTAGAATCATATTGCTAAAA  | 29826 | CGG | 0 | 1 |
| ATTCTAGGCCATAACGGCGA  | 29858 | CGG | 0 | 1 |
| CTTGCTCTTTTGTTTGAAT   | 30024 | CGG | 0 | 1 |
| GATAAATCAGTGATAAATTC  | 30049 | CGG | 0 | 1 |
| TATAAATAATTTTCGTTCTA  | 30111 | GGG | 0 | 1 |
| AATGCGTATAGATACATTGA  | 30254 | TGG | 0 | 1 |
| GTACGTTTCCAATATAGAAC  | 30329 | TGG | 0 | 1 |
| AGACAAAGTATTGTATCAAA  | 30544 | TGG | 0 | 1 |
| GTTAACACCTCTTTGGCCGA  | 30860 | TGG | 0 | 1 |
| ATTTATTCCATCGGCCAAAG  | 30869 | AGG | 0 | 1 |
| GCTGGGTTCTGTATTGGTAA  | 30943 | CGG | 0 | 1 |
| GTAATATCACTTAGATATGC  | 30961 | TGG | 0 | 1 |
| CTAAGTGATATTACGGAAGT  | 30986 | TGG | 0 | 1 |

|                       |       |     |   |   |
|-----------------------|-------|-----|---|---|
| TCTCTAAACGCTTTCGGTAA  | 31039 | CGG | 0 | 1 |
| CCTGCATCTCTAAACGCTTT  | 31045 | CGG | 0 | 1 |
| ATAAGAAAAACAACGGAGCA  | 31197 | TGG | 0 | 1 |
| AATTTCTGTCCGAAAACGC   | 31220 | CGG | 0 | 1 |
| ATAATTTTGTAATATTCTTA  | 31242 | GGG | 0 | 1 |
| ATGGAGTTTATTCGAGGGAA  | 31495 | AGG | 0 | 1 |
| TATGAATCAGATAGAGGAAC  | 31621 | TGG | 0 | 1 |
| ACGATAGTAGACGCAATTAA  | 31774 | TGG | 0 | 1 |
| AGGCATTCTTTACACAAAAC  | 31856 | GGG | 0 | 1 |
| GAAGTTGAACAACAAATCAA  | 32221 | TGG | 0 | 1 |
| AAGGTAATTCAACAACAAAT  | 32258 | TGG | 0 | 1 |
| GGACAAGATGGTGTGATGA   | 32440 | CGG | 0 | 1 |
| ACTTATACATCAAGCAAATC  | 32482 | TGG | 0 | 1 |
| GCAACAACATAAGATGACAG  | 32727 | AGG | 0 | 1 |
| TTGTTGACGGTGGCGCAA    | 33019 | TGG | 0 | 1 |
| GCGAATGTAGTTGACTCAGA  | 33175 | CGG | 0 | 1 |
| GTAGTTGACTCAGACGGCAA  | 33181 | CGG | 0 | 1 |
| GACTCAGACGGCAACGGTGG  | 33187 | CGG | 0 | 1 |
| AACGATAAAAACGAAGTTAT  | 33366 | CGG | 0 | 1 |
| TTAAGTGATGAGGAACTTCG  | 33570 | CGG | 0 | 1 |
| ACTAACAAAACAAATACTGA  | 33696 | GGG | 0 | 1 |
| ACATTA AAACTTTTTATGTG | 33760 | TGG | 0 | 1 |
| ATAAAAATGAGCAAATTAAG  | 33790 | TGG | 0 | 1 |
| GAAGAATATGCATTGATCAC  | 33840 | TGG | 0 | 1 |
| ATATACGCGATATGAAAATG  | 34151 | TGG | 0 | 1 |
| GATATGAAAATGTGGATTCT  | 34159 | CGG | 0 | 1 |
| GCTTTACTAAGAACTATTTT  | 34216 | TGG | 0 | 1 |
| GAACTATTTTTGGTATTTAA  | 34226 | AGG | 0 | 1 |
| ACCATGCTTAAAGGGATTTT  | 34257 | AGG | 0 | 1 |
| GGATTTTAGGATATAGCTTC  | 34270 | TGG | 0 | 1 |
| TTCTGGGCGTGCTTCTGGTT  | 34287 | TGG | 0 | 1 |
| AAGAGTCAGTGCTTCGGCAC  | 34328 | TGG | 0 | 1 |
| GCCTACAGCTAGTGAAGTGG  | 34411 | TGG | 0 | 1 |
| ACTTTATTTTTAAAAGATAT  | 34509 | TGG | 0 | 1 |
| CGATAGAATCGGAAACCCTT  | 34564 | AGG | 0 | 1 |
| GGACACACCGCAATAGTAGT  | 34676 | AGG | 0 | 1 |
| TTTATAGCGTTGACCAAAC   | 34719 | TGG | 0 | 1 |
| CTAGTATCTTTGAATATGG   | 34804 | AGG | 0 | 1 |
| GTTTTAACTTCTTTAAATTG  | 34900 | CGG | 0 | 1 |
| TCTCTATCGACATATAAATG  | 35104 | CGG | 0 | 1 |
| GCATTTATATGTCGATAGAG  | 35122 | AGG | 0 | 1 |
| ATGTCGATAGAGAGGCTACA  | 35130 | TGG | 0 | 1 |
| ATGACCCGCGTCACCCTAAT  | 35175 | TGG | 0 | 1 |
| CTAGTTATTGAAGTATGTGG  | 35198 | TGG | 0 | 1 |
| AAGCGTTAATACGTGGTGTT  | 35262 | TGG | 0 | 1 |

|                       |       |     |   |   |
|-----------------------|-------|-----|---|---|
| AATTACGACTTGATTAAGCA  | 35369 | AGG | 0 | 1 |
| GTTTTTCGTCTGATGGAGTA  | 35535 | GGG | 0 | 1 |
| CCCCATGTATGAGATTTTTT  | 35629 | CGG | 0 | 1 |
| ACCCGAAAAAATCTCATACA  | 35643 | TGG | 0 | 1 |
| AAAATCTCATACATGGGGCT  | 35650 | GGG | 0 | 1 |
| CAATGAATGTTAAGCGAATA  | 35703 | TGG | 0 | 1 |
| CAAACGTCATTGCATAATCA  | 35970 | GGG | 0 | 1 |
| ATGACGTTTGCTAAAAATAA  | 35999 | AGG | 0 | 1 |
| CGTTTGCTAAAAATAAAGGT  | 36003 | TGG | 0 | 1 |
| TCTCCAGCAAAGCAATCAT   | 36029 | GGG | 0 | 1 |
| CGGTGCTAGCTTCGTAAGAA  | 36052 | AGG | 0 | 1 |
| GGTGTTGACTTAGGTGACAT  | 36287 | TGG | 0 | 1 |
| AATACAGCATCTATAAGAAT  | 36335 | AGG | 0 | 1 |
| TTACATTTGTTTATGGAAGA  | 36413 | TGG | 0 | 1 |
| ATTATCGACGATGTTGTAAA  | 36461 | AGG | 0 | 1 |
| AAAAAGGTTATCAAACACGC  | 36506 | TGG | 0 | 1 |
| CAAAGCAGAACCTGAGTTAT  | 36931 | TGG | 0 | 1 |
| ATCAATATCGCAAATGTTGA  | 36959 | AGG | 0 | 1 |
| AGTTAGTACAGAAGATTTTTG | 37174 | AGG | 0 | 1 |
| ATGAAGGCTTTTTCCATACT  | 37484 | TGG | 0 | 1 |
| ATGCTGGAAATATCCAAGTA  | 37487 | TGG | 0 | 1 |
| GGATATTTATTTTTAGGTAA  | 37521 | GGG | 0 | 1 |
| CTTACCTAAAAATAAATATC  | 37539 | CGG | 0 | 1 |
| ACAGCAAATGGACAATAAAA  | 37579 | TGG | 0 | 1 |
| TGTACGTAGCGGTATAATGA  | 37641 | GGG | 0 | 1 |
| GGAATATCAGGAGTCAATAG  | 37696 | CGG | 0 | 1 |
| TTCAACCCAGATGGTTGGTA  | 38245 | TGG | 0 | 1 |
| ATCTTTGCTTTATTATCAAA  | 38334 | CGG | 0 | 1 |
| CTCCGCCACCATACTTTGAC  | 38426 | GGG | 0 | 1 |
| AACGGTAAAGGTTGGACTAA  | 38530 | TGG | 0 | 1 |
| ACAATCCAATGTATTTTATT  | 38609 | AGG | 0 | 1 |
| AGCGTTGGCAATAAAGCTAA  | 38653 | AGG | 0 | 1 |
| ATTATGCTTGTAGCCGGTCA  | 38728 | TGG | 0 | 1 |
| CCAGCTACCAAACCACCTAT  | 39267 | AGG | 0 | 1 |
| GCGATTCATGGTAAGCCTAT  | 39268 | AGG | 0 | 1 |
| TGGTAAGCCTATAGGTGGTT  | 39276 | TGG | 0 | 1 |
| CAACTAATTCAAGAATTACA  | 39452 | GGG | 0 | 1 |
| AACTAATTCAAGAATTACAG  | 39453 | GGG | 0 | 1 |
| ATACGTAATTGTTGTGTTGT  | 39466 | TGG | 0 | 1 |
| ATTGTATTAATGGTTATAGA  | 39515 | TGG | 0 | 1 |
| GGTAATAGAATAAGTAGTTT  | 39601 | TGG | 0 | 1 |
| ATTTTGCTACATTAATTATA  | 39661 | GGG | 0 | 1 |
| TGTTACCCCAAGCATGTCAC  | 39880 | TGG | 0 | 1 |
| CTAAAGTCATATATACTACG  | 39928 | GGG | 0 | 1 |
| GCTAAAGTCATATATACTAC  | 39929 | GGG | 0 | 1 |

|                       |       |     |   |   |
|-----------------------|-------|-----|---|---|
| GGTTATTTTTTTCGTTTTTTT | 40222 | TGG | 0 | 1 |
| ATCCTTGTATGATGGTAAAC  | 40350 | CGG | 0 | 1 |
| CGGCTTTTAAAAATAAAAAA  | 69    | GGG | 0 | 0 |
| AATAAAAAAGGGCAGAAAAA  | 80    | GGG | 0 | 0 |
| AGAAAACTTGTGTACTAAA   | 93    | AGG | 0 | 0 |
| AAAACCTTTCTGAAGAAAT   | 768   | TGG | 0 | 0 |
| GAAATCAACAGAATTATTGA  | 1024  | CGG | 0 | 0 |
| TTAAAAAGCGTTTTAGCGCT  | 1902  | TGG | 0 | 0 |
| GGATTCCTTATTAACGCAA   | 2345  | GGG | 0 | 0 |
| TGATCAGAAAGCATAAAAAA  | 3041  | TGG | 0 | 0 |
| CCTAGCTCTATTTCTATTTG  | 3682  | TGG | 0 | 0 |
| GAAACTAAAAATTAATTA    | 4599  | AGG | 0 | 0 |
| AAAAGCTGAAGAAAATAACG  | 5075  | GGG | 0 | 0 |
| AGATAAAGCGTTATTATATT  | 5591  | GGG | 0 | 0 |
| TACAAAAGCTTTACCATAGG  | 5994  | CGG | 0 | 0 |
| TTTTGATGTCTATTACCCAG  | 6035  | GGG | 0 | 0 |
| AAAACGGATTATCGGCAAAC  | 7211  | GGG | 0 | 0 |
| GCAAACGGGTTTTTCGGAAAA | 7225  | CGG | 0 | 0 |
| AAAAATACAACCAACTGGCA  | 7602  | CGG | 0 | 0 |
| AGTAATCGGAGACGATTTCA  | 8418  | GGG | 0 | 0 |
| CCCCTATCGTCTGAATATTA  | 8589  | AGG | 0 | 0 |
| AGTGACCTAAAACGATTCAA  | 8760  | AGG | 0 | 0 |
| AACGATTCAAAGGCGCTCAC  | 8770  | GGG | 0 | 0 |
| GTTGCAAAAAGAGTACGTGG  | 9536  | TGG | 0 | 0 |
| AGATAGAGTGTTTGACTTGT  | 10032 | GGG | 0 | 0 |
| GCAACATGGTTTGAATACG   | 10259 | AGG | 0 | 0 |
| TATTAGACGAGTTAATTA    | 10350 | TGG | 0 | 0 |
| TGACGTTAATCTGGAAAGAT  | 10686 | GGG | 0 | 0 |
| GACGTTAATCTGGAAAGATG  | 10687 | GGG | 0 | 0 |
| CTATGCTTGCAGTTTGAAC   | 10847 | GGG | 0 | 0 |
| TGATGCCGAAATATCGAGTG  | 10912 | TGG | 0 | 0 |
| TTAAAAGATTTTATGTTGA   | 11220 | GGG | 0 | 0 |
| ATACTCAAAGTAATCATTTT  | 11235 | CGG | 0 | 0 |
| CTTCCTTAGATATGACTGTG  | 11288 | AGG | 0 | 0 |
| AGATATGACTGTGAGGTTAA  | 11295 | AGG | 0 | 0 |
| GATGAGCTTATTGGGGATAT  | 11447 | AGG | 0 | 0 |
| TATAACGGCAATGACACAGA  | 11682 | GGG | 0 | 0 |
| TTAGCTGACATGTTGGCGTT  | 12076 | TGG | 0 | 0 |
| AATTCTTTGAATATTATCTG  | 12222 | TGG | 0 | 0 |
| GATCGAGTCAAGGAGGTTTT  | 12422 | GGG | 0 | 0 |
| TAAGGGAGTGTGGGAAATGA  | 12635 | CGG | 0 | 0 |
| AGTTGGGATCAATGTTGAGG  | 13009 | AGG | 0 | 0 |
| TTACTTGAGTTTTCCCCTTG  | 13940 | TGG | 0 | 0 |
| CGGAAAGCATATATTGACGC  | 14639 | AGG | 0 | 0 |
| GGAAAGCATATATTGACGCA  | 14640 | GGG | 0 | 0 |

|                       |       |     |   |   |
|-----------------------|-------|-----|---|---|
| CACAGTAAAGTAAGTGGTAT  | 15396 | AGG | 0 | 0 |
| ATACGTGGTATGACATCGTT  | 15423 | TGG | 0 | 0 |
| TCTTTCAACAACCAATGCTC  | 15539 | GGG | 0 | 0 |
| AACGTAATATCAACGGTATG  | 15706 | TGG | 0 | 0 |
| ATCAACGGTATGTGGGTGTC  | 15714 | TGG | 0 | 0 |
| TACTTTGCTGGTGTCTGACTG | 15819 | GGG | 0 | 0 |
| GAAAAAGAAGATTTTGAAAC  | 16454 | TGG | 0 | 0 |
| GATGATGAGGATTCTGAAAT  | 16664 | AGG | 0 | 0 |
| GGTAAAATGGCAGCAATTTG  | 16685 | CGG | 0 | 0 |
| GATGATAGGAGATGCTGAAA  | 16999 | AGG | 0 | 0 |
| AACGGAAATGTACCTATCAT  | 17303 | TGG | 0 | 0 |
| GCGTCACCTTCATCTATGTC  | 17635 | AGG | 0 | 0 |
| ATACGTATGCACATTACACA  | 18135 | AGG | 0 | 0 |
| TACTCATCGTCATTTAGATG  | 18365 | GGG | 0 | 0 |
| TCATTTAGATGGGGAATCAG  | 18374 | TGG | 0 | 0 |
| GCTTTTTATTATGCACTTTT  | 18877 | CGG | 0 | 0 |
| CGGACTGTTAGGGTACGCGA  | 18897 | AGG | 0 | 0 |
| GAAGTAAAAGATTATCTAAA  | 18991 | GGG | 0 | 0 |
| CAATATTAGAAAATAAAGTG  | 19509 | AGG | 0 | 0 |
| GCAACTCCAACATACACGCC  | 19544 | AGG | 0 | 0 |
| TTAATCATGAAAGACATTA   | 19621 | TGG | 0 | 0 |
| CAAAAGGTGTAGGCGCCTAC  | 19716 | TGG | 0 | 0 |
| CCACTAGTTGAAGTGTTGTA  | 19924 | AGG | 0 | 0 |
| CCTTACAACACTTCAACTAG  | 19940 | TGG | 0 | 0 |
| GATGAAGAGTTAGATCCAAA  | 20060 | CGG | 0 | 0 |
| CATATCTCCTCCTATTCAGT  | 20425 | TGG | 0 | 0 |
| CTGAATAGGAGGAGATATGA  | 20445 | TGG | 0 | 0 |
| GTGTCGTACACTTATAACGA  | 20865 | TGG | 0 | 0 |
| CTCTACCTTATTGATTTAAA  | 20927 | CGG | 0 | 0 |
| TGATAGCATGGTTGTTGAAT  | 21320 | TGG | 0 | 0 |
| TCGATAAGAAAATAGAAGAG  | 21349 | TGG | 0 | 0 |
| TGCGCCGACACTTATAACAC  | 21477 | TGG | 0 | 0 |
| ATATACGTTGAATACGGTAC  | 21525 | TGG | 0 | 0 |
| TCAATTGCAGGGTTCCAAA   | 21635 | TGG | 0 | 0 |
| CAACTAGTTTGTTAATGTTA  | 21766 | GGG | 0 | 0 |
| TTAACAATTGGTAATGTGCC  | 22329 | TGG | 0 | 0 |
| CGTGCAGACGGTAAACATCA  | 22431 | CGG | 0 | 0 |
| AATGACATTTCAAATGATTC  | 22457 | TGG | 0 | 0 |
| AAAGAGTGGTTTGAAGCTGC  | 22575 | AGG | 0 | 0 |
| GAAAAATTCGGCGAAAAAGT  | 22617 | CGG | 0 | 0 |
| TGTTGTATCTGATTCACACA  | 22667 | CGG | 0 | 0 |
| TATGTAAACTAATAGATCAA  | 22700 | GGG | 0 | 0 |
| TCTCAGAAGATAGCGAAGAT  | 22879 | GGG | 0 | 0 |
| CAAAGCGATTTTACAATTTT  | 22961 | GGG | 0 | 0 |
| TTGGACAACTTAACAATAG   | 23094 | TGG | 0 | 0 |



|                       |       |     |   |   |
|-----------------------|-------|-----|---|---|
| CAATAGTGGTTTTTTCAAGA  | 23108 | GGG | 0 | 0 |
| TCCTCGCTTTTGGCCATATT  | 23150 | CGG | 0 | 0 |
| GCTAACCTCCTTTGATTCA   | 23571 | AGG | 0 | 0 |
| GCTTTGGAAATCTCTAATAT  | 23627 | TGG | 0 | 0 |
| CCTTTAACCGCCATTTTAGC  | 23980 | GGG | 0 | 0 |
| CGAAGATAGTACCGAAAGTT  | 24243 | CGG | 0 | 0 |
| ATGGCAGTACTTAATGCGGT  | 24359 | TGG | 0 | 0 |
| AATGCGGTTGGTGTATTAGG  | 24371 | TGG | 0 | 0 |
| GCGGTTGGTGTATTAGGTGG  | 24374 | TGG | 0 | 0 |
| GCTCTTAAAATGGTTGAAGA  | 24470 | TGG | 0 | 0 |
| GCTGCAGGAAGATTTGGCGA  | 24791 | CGG | 0 | 0 |
| CCAAAATTGGGCTAATAGTG  | 24892 | TGG | 0 | 0 |
| CCAGCAGTCGCTCAAATTAT  | 25292 | CGG | 0 | 0 |
| GCTCAAATTATCGGTGTTAT  | 25301 | CGG | 0 | 0 |
| TATTTTAGGTGGCGTATTTT  | 25324 | GGG | 0 | 0 |
| TTTAACTAGAATAACTGGGG  | 25435 | TGG | 0 | 0 |
| AAAGCGTTCGGTTTATTGAC  | 25463 | TGG | 0 | 0 |
| TTGGTATTCTTGTATTTA    | 25545 | TGG | 0 | 0 |
| GCAGTTTCCGGTGCATTCA   | 25625 | AGG | 0 | 0 |
| ATGCCTATATTACAAGTATT  | 25706 | AGG | 0 | 0 |
| TACGGATATCACTGTTCCCTA | 25817 | TGG | 0 | 0 |
| GTTGGTTCAGTCGTGTTGCT  | 26118 | TGG | 0 | 0 |
| CGCACGATATAGAAGTAATA  | 26777 | AGG | 0 | 0 |
| CTACAAACGAAGGTGATAAG  | 27335 | AGG | 0 | 0 |
| AACTGATTAACCTGTGTTAA  | 27399 | AGG | 0 | 0 |
| GAACAACCGGTTTTATATCC  | 27628 | AGG | 0 | 0 |
| AACCGTTTTATATCCAGGC   | 27632 | TGG | 0 | 0 |
| CTATTTTAGGGTTAGCTTCT  | 28551 | GGG | 0 | 0 |
| CCAGAAGCTAACCTAAAAT   | 28568 | AGG | 0 | 0 |
| AATAGGTGATGTTGTTAGAG  | 28585 | TGG | 0 | 0 |
| AGGTGATGTTGTTAGAGTGG  | 28588 | TGG | 0 | 0 |
| ACTAAGCAAGATGTAGTATT  | 28685 | AGG | 0 | 0 |
| ACTAATTTACAGAAATGTT   | 29027 | AGG | 0 | 0 |
| AAAACGACTAATCTTGCAAG  | 29066 | AGG | 0 | 0 |
| TCTACCGCTTCTTTACCTAT  | 29095 | TGG | 0 | 0 |
| ACAATGGCAACAGTTCCAAT  | 29096 | AGG | 0 | 0 |
| AGACAAGCAGAGCAAATAAG  | 29147 | AGG | 0 | 0 |
| TACAAGGCACTGATGATGAT  | 29184 | TGG | 0 | 0 |
| ATGATTGGTTACACGGTTAT  | 29199 | TGG | 0 | 0 |
| ACGGATACAAAAACGTTTTA  | 29249 | CGG | 0 | 0 |
| ACAAGACAATGCCCTATGAG  | 29342 | TGG | 0 | 0 |
| GACACGGACAAAAACAAACT  | 29384 | AGG | 0 | 0 |
| CAAAGTAGGGTTAACTTG    | 29398 | AGG | 0 | 0 |
| ACCTCGTGACTTTTTCGTT   | 29533 | AGG | 0 | 0 |
| ATTACAGTTTTTACGACTAA  | 29598 | AGG | 0 | 0 |

|                       |       |     |   |   |
|-----------------------|-------|-----|---|---|
| AGGAGGCAACCAATGGCTTA  | 29618 | CGG | 0 | 0 |
| CGTTTTAGCAATATGATTCT  | 29843 | AGG | 0 | 0 |
| CGAACCAAAAGAGCAAGAAC  | 30046 | CGG | 0 | 0 |
| ATATAAATAATTTTCGTTCT  | 30112 | AGG | 0 | 0 |
| GAATTCGTTGAACTTTGTTG  | 30490 | AGG | 0 | 0 |
| AGGAGACTTCCAAGAAGCTG  | 30757 | AGG | 0 | 0 |
| CTTTAATAGGGGTA ACTAT  | 30821 | TGG | 0 | 0 |
| GTATCGATGACTGATTCAGG  | 30926 | CGG | 0 | 0 |
| TCTATCTACGTTATAATCAT  | 31711 | CGG | 0 | 0 |
| CAGGCATTCTTTACACAAAA  | 31855 | CGG | 0 | 0 |
| AATGGCGCTGACCTTGTTAA  | 32239 | AGG | 0 | 0 |
| AATAATGCGCAAGGCGATTT  | 32779 | GGG | 0 | 0 |
| AGGTAGCGTTGAAAGTTATG  | 32850 | AGG | 0 | 0 |
| ACGGCAGACTTGAGCAACAG  | 32966 | TGG | 0 | 0 |
| AAATCAACGGTATTGTTCGA  | 33007 | CGG | 0 | 0 |
| CACAACTATTCTATTTTGT   | 33075 | TGG | 0 | 0 |
| GGTGGCGTTATTGAGGGATT  | 33115 | CGG | 0 | 0 |
| AACGATGTGTACTTTGATTT  | 33262 | AGG | 0 | 0 |
| CTATACTAAAATTATGGGG   | 33323 | TGG | 0 | 0 |
| ATTA AAACTTTTTATGTGTG | 33762 | GGG | 0 | 0 |
| GACTTTTCATCTTTTGCCTC  | 33857 | TGG | 0 | 0 |
| CCAAACGGCACGAACATGAA  | 33959 | TGG | 0 | 0 |
| AACTTTAGATGCTATCCAGA  | 34086 | GGG | 0 | 0 |
| ATGTGGATTCTCGGTTTGAT  | 34168 | AGG | 0 | 0 |
| CTATTTTTGGTATTTAAAGG  | 34229 | AGG | 0 | 0 |
| AGCTAGTGAAGTGGTGGAGT  | 34417 | GGG | 0 | 0 |
| TTATCGGGGCAGTCAATGTT  | 34477 | GGG | 0 | 0 |
| TATTGGGGTTTTGTAACATG  | 34526 | GGG | 0 | 0 |
| CAGATGAATAACGATAGAAT  | 34575 | CGG | 0 | 0 |
| AACCTGGAGACATCGCAGTT  | 34626 | TGG | 0 | 0 |
| CCGAACCTATTCCGTTGCCA  | 34635 | GGG | 0 | 0 |
| GGCAACGGAATAGGTTCGGA  | 34655 | CGG | 0 | 0 |
| AGATGGTCCTACTACTATTG  | 34667 | CGG | 0 | 0 |
| ACTGGGTTAATTCTAATAGT  | 34737 | TGG | 0 | 0 |
| GAACTTGTATCAGTACTACT  | 34831 | AGG | 0 | 0 |
| CGTGGTGTTTGGTTATTGTC  | 35273 | AGG | 0 | 0 |
| CTTATCTGAAACGACGTTAA  | 35308 | AGG | 0 | 0 |
| TGATGGAGTAGGGCCTCGTG  | 35525 | TGG | 0 | 0 |
| AGTGCTTGCTGGAATGTGAA  | 35581 | TGG | 0 | 0 |
| AAAAATCTCATACATGGGGC  | 35649 | TGG | 0 | 0 |
| AAAGGAAAAGGAACGCTCGA  | 35807 | CGG | 0 | 0 |
| TACGGTGCATATAATTA CTT | 35942 | CGG | 0 | 0 |
| AGGGATAAATATAAATAAAG  | 36215 | AGG | 0 | 0 |
| GAAACGAGAATAAAAAATGA  | 36266 | TGG | 0 | 0 |
| CGTATCGATCTAAAAGCACA  | 36377 | TGG | 0 | 0 |

|                      |       |     |   |   |
|----------------------|-------|-----|---|---|
| AAAGGTGCGAAAGGTGATAA | 36773 | AGG | 0 | 0 |
| AAAGGCGAACCGGGACAACC | 36791 | TGG | 0 | 0 |
| CCGGGACAACCTGGTGCAAA | 36800 | AGG | 0 | 0 |
| AGTAAATATAGAAAAGCAAC | 38090 | AGG | 0 | 0 |
| CAAAAAATCAAGCAGAAAAA | 38198 | TGG | 0 | 0 |
| GGGAAACAATTCAACCCAGA | 38236 | TGG | 0 | 0 |
| AACAATTCAACCCAGATGGT | 38240 | TGG | 0 | 0 |
| ACTAATGGCGTTGCGCAACC | 38545 | TGG | 0 | 0 |
| GCTACAAGCATAATTTTTTT | 38703 | AGG | 0 | 0 |
| GGTCATGGTTATAACGATCC | 38743 | TGG | 0 | 0 |
| CATGAAGTTGCATTATACGG | 38851 | TGG | 0 | 0 |
| TTATATTGGGTTAAATCACA | 38947 | GGG | 0 | 0 |
| GCAGCAGGAGAAAGCGCAAG | 39001 | TGG | 0 | 0 |
| ATTCATGGTAAGCCTATAGG | 39271 | TGG | 0 | 0 |
| CCTATAGGTGGTTTGGTAGC | 39283 | TGG | 0 | 0 |
| GTATAACCTGCTGGCACTGG | 39324 | TGG | 0 | 0 |
| TGCCTTGTTCTTTTTTATAA | 39365 | GGG | 0 | 0 |
| AAAGGTAATAATGTAAGAGA | 39424 | CGG | 0 | 0 |
| CAACGTCGTTATATAGCGAC | 39562 | AGG | 0 | 0 |
| ACAAGGAAGATGTCTCCTGT | 40055 | GGG | 0 | 0 |
| TGTGGTTTTGTTGGTTGTAG | 40161 | GGG | 0 | 0 |
| GTTTTTTTGGGGCAAAAAAA | 40235 | GGG | 0 | 0 |
| CCTTGATACAACAGTGTTTT | 40319 | TGG | 0 | 0 |
| CGTGTACGTTAGAGAATGAC | 40347 | CGG | 0 | 0 |

| <b>Early Time Point Normalized Reads</b> | <b>Late Time Point Normalized Reads</b> |
|------------------------------------------|-----------------------------------------|
| 27416.00                                 | 20187.02                                |
| 21768.42                                 | 16631.67                                |
| 18475.95                                 | 20479.71                                |
| 17948.40                                 | 11526.52                                |
| 17898.95                                 | 11149.52                                |
| 16043.11                                 | 15775.94                                |
| 13403.01                                 | 3648.91                                 |
| 12720.03                                 | 9706.56                                 |
| 12058.24                                 | 3675.76                                 |
| 11869.83                                 | 11526.61                                |
| 11855.70                                 | 16251.00                                |
| 10979.59                                 | 7489.25                                 |
| 10508.57                                 | 7589.78                                 |
| 9917.43                                  | 9192.55                                 |
| 9710.18                                  | 9076.45                                 |
| 9618.33                                  | 7788.63                                 |
| 9314.52                                  | 10201.41                                |
| 8885.88                                  | 15652.96                                |
| 8779.90                                  | 5969.77                                 |
| 8028.62                                  | 6575.60                                 |
| 7642.38                                  | 6181.28                                 |
| 7562.30                                  | 7524.25                                 |
| 7319.73                                  | 8624.39                                 |
| 7246.72                                  | 5075.19                                 |
| 7105.41                                  | 3116.66                                 |
| 6785.11                                  | 5839.00                                 |
| 6217.53                                  | 8346.63                                 |
| 6083.29                                  | 8434.42                                 |
| 5991.44                                  | 4791.84                                 |
| 5772.41                                  | 2368.70                                 |
| 5682.92                                  | 2963.63                                 |
| 5496.86                                  | 2625.57                                 |
| 5454.47                                  | 5101.76                                 |
| 5117.69                                  | 5054.38                                 |
| 4879.82                                  | 5326.09                                 |
| 4493.58                                  | 4341.06                                 |
| 4397.02                                  | 7170.62                                 |
| 4333.43                                  | 5096.45                                 |
| 4276.91                                  | 3818.44                                 |
| 4246.29                                  | 1546.24                                 |
| 4116.76                                  | 7684.07                                 |
| 4029.62                                  | 8176.18                                 |
| 3916.57                                  | 948.29                                  |
| 3907.15                                  | 5715.01                                 |

|         |         |
|---------|---------|
| 3895.38 | 2840.46 |
| 3836.50 | 5913.05 |
| 3815.30 | 6354.47 |
| 3747.00 | 6243.41 |
| 3666.93 | 8042.11 |
| 3636.31 | 900.91  |
| 3535.04 | 1536.80 |
| 3490.29 | 239.64  |
| 3462.03 | 6383.80 |
| 3447.90 | 5094.70 |
| 3443.19 | 6371.89 |
| 3396.09 | 4928.56 |
| 3264.20 | 5978.20 |
| 3193.55 | 6222.97 |
| 3134.67 | 4738.68 |
| 3106.41 | 2888.57 |
| 3061.66 | 643.95  |
| 2986.30 | 5805.00 |
| 2981.59 | 3627.74 |
| 2955.68 | 33.45   |
| 2918.00 | 2524.85 |
| 2807.31 | 41.88   |
| 2804.95 | 19.61   |
| 2790.82 | 2435.14 |
| 2762.56 | 2656.72 |
| 2757.85 | 5234.00 |
| 2720.17 | 24.83   |
| 2715.46 | 148.09  |
| 2684.84 | 4191.41 |
| 2670.71 | 4982.90 |
| 2668.36 | 4265.27 |
| 2588.28 | 575.86  |
| 2552.95 | 4949.91 |
| 2517.63 | 2990.11 |
| 2501.14 | 3440.06 |
| 2487.01 | 5127.05 |
| 2477.59 | 2161.87 |
| 2475.24 | 4338.86 |
| 2458.75 | 4002.18 |
| 2418.71 | 1473.93 |
| 2371.61 | 3296.46 |
| 2364.55 | 73.59   |
| 2345.70 | 1616.89 |
| 2336.28 | 81.74   |
| 2333.93 | 5100.66 |

|         |         |
|---------|---------|
| 2305.67 | 3092.75 |
| 2286.83 | 1617.62 |
| 2284.47 | 2662.77 |
| 2244.43 | 1449.92 |
| 2242.08 | 4262.89 |
| 2239.72 | 3155.70 |
| 2183.20 | 3443.08 |
| 2176.14 | 3699.31 |
| 2150.23 | 3608.95 |
| 2117.26 | 21.17   |
| 2100.77 | 578.70  |
| 2100.77 | 18.60   |
| 2079.57 | 4418.04 |
| 2072.51 | 1595.54 |
| 2053.67 | 24.10   |
| 2051.31 | 1793.94 |
| 1992.44 | 921.07  |
| 1987.73 | 2254.79 |
| 1933.56 | 1537.44 |
| 1931.20 | 3021.36 |
| 1912.36 | 1415.83 |
| 1893.52 | 3484.50 |
| 1888.81 | 4069.90 |
| 1886.45 | 2442.84 |
| 1867.61 | 3365.92 |
| 1865.26 | 1054.41 |
| 1832.29 | 2661.31 |
| 1815.80 | 1993.25 |
| 1813.45 | 3777.75 |
| 1801.67 | 479.73  |
| 1768.70 | 3823.30 |
| 1763.99 | 25.29   |
| 1756.92 | 3523.45 |
| 1721.60 | 552.95  |
| 1721.60 | 15.40   |
| 1712.18 | 2125.86 |
| 1709.82 | 68.09   |
| 1695.69 | 2970.41 |
| 1676.85 | 1677.92 |
| 1653.30 | 106.49  |
| 1636.81 | 845.74  |
| 1599.13 | 2241.05 |
| 1596.77 | 2376.49 |
| 1563.80 | 2967.29 |
| 1556.74 | 16.31   |

|         |         |
|---------|---------|
| 1554.38 | 3086.79 |
| 1535.54 | 1084.46 |
| 1530.83 | 2559.86 |
| 1526.12 | 171.37  |
| 1502.57 | 1102.79 |
| 1497.86 | 1160.52 |
| 1481.37 | 2811.14 |
| 1476.66 | 1391.27 |
| 1457.82 | 2905.53 |
| 1457.82 | 1983.91 |
| 1455.47 | 887.90  |
| 1448.40 | 1592.97 |
| 1441.34 | 2126.86 |
| 1406.01 | 1974.56 |
| 1398.94 | 1318.14 |
| 1394.23 | 1045.42 |
| 1384.81 | 2633.72 |
| 1382.46 | 2799.22 |
| 1380.10 | 23.55   |
| 1375.39 | 1787.25 |
| 1368.33 | 2536.58 |
| 1365.97 | 1264.35 |
| 1363.62 | 2469.05 |
| 1363.62 | 1334.73 |
| 1363.62 | 48.66   |
| 1356.55 | 235.51  |
| 1351.84 | 2625.38 |
| 1344.78 | 764.37  |
| 1342.42 | 2722.06 |
| 1340.07 | 478.18  |
| 1335.36 | 1643.56 |
| 1328.29 | 2621.35 |
| 1307.09 | 763.08  |
| 1302.38 | 1275.44 |
| 1297.67 | 1890.80 |
| 1295.32 | 1256.47 |
| 1292.96 | 1922.23 |
| 1281.19 | 502.73  |
| 1281.19 | 150.38  |
| 1276.48 | 2413.15 |
| 1274.12 | 250.08  |
| 1259.99 | 1466.23 |
| 1248.22 | 822.19  |
| 1236.44 | 2272.57 |
| 1229.37 | 303.42  |

|         |         |
|---------|---------|
| 1215.24 | 2346.43 |
| 1205.82 | 2004.07 |
| 1201.11 | 2562.06 |
| 1182.27 | 2344.42 |
| 1182.27 | 1882.92 |
| 1179.92 | 2407.83 |
| 1177.56 | 1261.69 |
| 1177.56 | 1096.56 |
| 1170.50 | 1527.45 |
| 1161.08 | 2087.83 |
| 1142.24 | 2272.30 |
| 1137.53 | 332.19  |
| 1135.17 | 2385.47 |
| 1135.17 | 1221.56 |
| 1132.81 | 731.83  |
| 1123.39 | 2145.83 |
| 1118.68 | 839.69  |
| 1111.62 | 13.47   |
| 1099.84 | 20.34   |
| 1097.49 | 11.00   |
| 1092.78 | 1433.61 |
| 1083.36 | 2147.12 |
| 1064.52 | 151.11  |
| 1055.10 | 123.07  |
| 1043.32 | 1561.36 |
| 1043.32 | 572.47  |
| 1040.97 | 1544.13 |
| 1040.97 | 969.18  |
| 1040.97 | 9.26    |
| 1017.41 | 1786.33 |
| 1017.41 | 1554.48 |
| 1017.41 | 958.55  |
| 1003.28 | 1936.16 |
| 1003.28 | 1908.76 |
| 989.15  | 1543.12 |
| 979.73  | 1757.01 |
| 977.38  | 947.46  |
| 972.67  | 44.54   |
| 963.25  | 1784.96 |
| 958.54  | 10.36   |
| 956.18  | 810.00  |
| 953.83  | 1895.75 |
| 953.83  | 1511.23 |
| 953.83  | 519.96  |
| 944.40  | 660.90  |



|        |         |
|--------|---------|
| 932.63 | 1257.11 |
| 925.56 | 181.26  |
| 918.50 | 1852.77 |
| 918.50 | 1393.01 |
| 913.79 | 1741.24 |
| 913.79 | 392.95  |
| 911.43 | 1515.81 |
| 906.72 | 301.22  |
| 904.37 | 1591.87 |
| 902.01 | 244.13  |
| 902.01 | 163.49  |
| 885.53 | 561.02  |
| 883.17 | 1814.65 |
| 883.17 | 1088.68 |
| 878.46 | 1680.03 |
| 878.46 | 1337.48 |
| 876.11 | 1913.34 |
| 876.11 | 1750.04 |
| 873.75 | 49.21   |
| 873.75 | 9.07    |
| 871.40 | 1375.97 |
| 871.40 | 12.83   |
| 869.04 | 13.56   |
| 866.69 | 1649.60 |
| 857.27 | 1147.69 |
| 857.27 | 916.03  |
| 854.91 | 1275.81 |
| 850.20 | 36.11   |
| 845.49 | 1073.28 |
| 845.49 | 722.76  |
| 843.13 | 1897.03 |
| 843.13 | 1772.77 |
| 843.13 | 1305.59 |
| 833.71 | 3.57    |
| 831.36 | 1484.84 |
| 826.65 | 22.63   |
| 819.58 | 1485.39 |
| 817.23 | 881.66  |
| 817.23 | 486.15  |
| 812.52 | 1619.46 |
| 812.52 | 1342.98 |
| 807.81 | 35.37   |
| 805.45 | 1558.06 |
| 803.10 | 1416.47 |
| 800.74 | 1008.13 |

|        |         |
|--------|---------|
| 798.39 | 1726.49 |
| 798.39 | 1487.22 |
| 798.39 | 1381.10 |
| 788.97 | 1605.89 |
| 784.26 | 1554.67 |
| 784.26 | 1553.84 |
| 781.90 | 314.32  |
| 779.55 | 828.15  |
| 777.19 | 1429.39 |
| 774.84 | 25.84   |
| 772.48 | 981.55  |
| 770.13 | 721.66  |
| 767.77 | 1311.55 |
| 765.42 | 1233.74 |
| 763.06 | 522.53  |
| 760.71 | 622.69  |
| 760.71 | 277.76  |
| 755.99 | 1461.65 |
| 755.99 | 18.24   |
| 751.28 | 707.27  |
| 739.51 | 336.87  |
| 739.51 | 285.27  |
| 730.09 | 45.18   |
| 725.38 | 35.56   |
| 723.02 | 292.33  |
| 718.31 | 1402.09 |
| 718.31 | 225.62  |
| 711.25 | 1266.37 |
| 711.25 | 10.17   |
| 708.89 | 1146.78 |
| 706.54 | 1130.83 |
| 704.18 | 113.91  |
| 701.83 | 574.95  |
| 699.47 | 1283.96 |
| 699.47 | 217.46  |
| 692.41 | 1167.03 |
| 690.05 | 1378.17 |
| 687.70 | 180.16  |
| 687.70 | 34.91   |
| 685.34 | 1241.08 |
| 685.34 | 251.64  |
| 678.28 | 50.95   |
| 678.28 | 15.12   |
| 675.92 | 219.84  |
| 671.21 | 1067.23 |

|        |         |
|--------|---------|
| 671.21 | 144.88  |
| 666.50 | 1187.01 |
| 661.79 | 627.18  |
| 659.43 | 946.09  |
| 659.43 | 876.62  |
| 645.30 | 91.36   |
| 642.95 | 1224.76 |
| 642.95 | 519.32  |
| 640.59 | 775.00  |
| 635.88 | 1147.24 |
| 635.88 | 375.91  |
| 635.88 | 20.34   |
| 628.82 | 369.77  |
| 624.11 | 453.34  |
| 621.75 | 1183.71 |
| 621.75 | 271.44  |
| 617.04 | 496.05  |
| 614.69 | 1162.54 |
| 614.69 | 346.58  |
| 612.33 | 1098.12 |
| 609.98 | 1043.78 |
| 607.62 | 1177.66 |
| 607.62 | 842.17  |
| 607.62 | 7.06    |
| 607.62 | 6.96    |
| 605.27 | 1343.99 |
| 605.27 | 435.47  |
| 598.20 | 1312.83 |
| 595.85 | 1211.02 |
| 593.49 | 1117.91 |
| 593.49 | 702.97  |
| 591.14 | 511.62  |
| 588.78 | 1051.38 |
| 588.78 | 6.14    |
| 586.43 | 287.02  |
| 579.36 | 28.50   |
| 579.36 | 4.67    |
| 577.01 | 18.79   |
| 574.65 | 822.19  |
| 574.65 | 124.54  |
| 572.30 | 1016.47 |
| 567.59 | 1050.83 |
| 565.23 | 240.83  |
| 560.52 | 15.21   |
| 558.16 | 26.67   |

|        |         |
|--------|---------|
| 555.81 | 1167.49 |
| 555.81 | 1093.26 |
| 553.45 | 914.66  |
| 553.45 | 11.73   |
| 551.10 | 638.54  |
| 548.74 | 952.59  |
| 548.74 | 858.48  |
| 548.74 | 658.98  |
| 548.74 | 14.20   |
| 546.39 | 386.81  |
| 546.39 | 225.16  |
| 544.03 | 24.01   |
| 539.32 | 5.41    |
| 536.97 | 757.40  |
| 536.97 | 17.59   |
| 532.26 | 1157.23 |
| 529.90 | 757.68  |
| 529.90 | 297.92  |
| 527.55 | 941.69  |
| 527.55 | 5.96    |
| 525.19 | 1052.30 |
| 525.19 | 19.24   |
| 522.84 | 1097.84 |
| 522.84 | 13.38   |
| 518.13 | 1009.23 |
| 518.13 | 699.12  |
| 511.06 | 357.30  |
| 501.64 | 843.36  |
| 501.64 | 208.76  |
| 496.93 | 557.26  |
| 496.93 | 12.10   |
| 494.58 | 956.90  |
| 494.58 | 111.25  |
| 492.22 | 839.79  |
| 489.87 | 890.19  |
| 489.87 | 27.68   |
| 485.16 | 835.84  |
| 485.16 | 48.94   |
| 485.16 | 4.12    |
| 482.80 | 993.37  |
| 478.09 | 795.80  |
| 478.09 | 24.19   |
| 475.74 | 940.77  |
| 475.74 | 887.25  |
| 475.74 | 855.91  |

|        |         |
|--------|---------|
| 475.74 | 18.69   |
| 473.38 | 1037.18 |
| 473.38 | 931.43  |
| 473.38 | 31.62   |
| 471.02 | 877.36  |
| 466.31 | 4.03    |
| 463.96 | 566.06  |
| 461.60 | 834.38  |
| 461.60 | 343.47  |
| 459.25 | 1000.34 |
| 459.25 | 380.21  |
| 456.89 | 732.66  |
| 452.18 | 517.76  |
| 452.18 | 202.80  |
| 447.47 | 427.13  |
| 445.12 | 674.93  |
| 445.12 | 668.69  |
| 445.12 | 497.60  |
| 445.12 | 34.55   |
| 442.76 | 867.74  |
| 442.76 | 138.56  |
| 440.41 | 900.54  |
| 440.41 | 895.50  |
| 438.05 | 767.94  |
| 438.05 | 143.78  |
| 435.70 | 901.83  |
| 435.70 | 823.75  |
| 435.70 | 60.12   |
| 435.70 | 56.54   |
| 435.70 | 10.26   |
| 433.34 | 778.66  |
| 433.34 | 771.33  |
| 430.99 | 845.56  |
| 430.99 | 689.77  |
| 430.99 | 681.62  |
| 419.21 | 396.98  |
| 416.86 | 835.11  |
| 416.86 | 52.69   |
| 416.86 | 9.44    |
| 412.15 | 976.70  |
| 412.15 | 47.47   |
| 407.44 | 698.75  |
| 407.44 | 4.58    |
| 405.08 | 752.54  |
| 405.08 | 3.21    |

|        |        |
|--------|--------|
| 400.37 | 216.91 |
| 400.37 | 6.14   |
| 398.02 | 882.12 |
| 398.02 | 765.47 |
| 395.66 | 588.88 |
| 395.66 | 106.21 |
| 395.66 | 11.55  |
| 390.95 | 8.71   |
| 388.60 | 16.40  |
| 386.24 | 614.72 |
| 386.24 | 490.55 |
| 386.24 | 252.10 |
| 386.24 | 4.86   |
| 383.89 | 886.70 |
| 383.89 | 373.89 |
| 383.89 | 253.75 |
| 381.53 | 742.65 |
| 381.53 | 608.30 |
| 379.18 | 595.38 |
| 376.82 | 547.82 |
| 376.82 | 454.53 |
| 376.82 | 134.99 |
| 376.82 | 23.64  |
| 376.82 | 5.77   |
| 374.46 | 668.69 |
| 374.46 | 585.85 |
| 374.46 | 412.19 |
| 374.46 | 334.03 |
| 374.46 | 10.36  |
| 372.11 | 878.18 |
| 372.11 | 654.12 |
| 369.75 | 754.01 |
| 367.40 | 572.93 |
| 367.40 | 339.89 |
| 365.04 | 717.45 |
| 365.04 | 701.32 |
| 365.04 | 492.75 |
| 365.04 | 123.07 |
| 362.69 | 334.03 |
| 360.33 | 176.86 |
| 357.98 | 23.09  |
| 357.98 | 9.99   |
| 357.98 | 3.85   |
| 355.62 | 619.21 |
| 355.62 | 583.65 |

|        |        |
|--------|--------|
| 355.62 | 305.80 |
| 355.62 | 12.28  |
| 353.27 | 663.20 |
| 353.27 | 380.58 |
| 350.91 | 238.35 |
| 350.91 | 155.33 |
| 350.91 | 49.49  |
| 350.91 | 33.27  |
| 348.56 | 496.05 |
| 346.20 | 17.59  |
| 341.49 | 685.74 |
| 341.49 | 47.47  |
| 339.14 | 783.61 |
| 339.14 | 56.45  |
| 339.14 | 5.96   |
| 336.78 | 769.31 |
| 336.78 | 580.26 |
| 334.43 | 306.81 |
| 332.07 | 746.13 |
| 332.07 | 597.95 |
| 332.07 | 162.57 |
| 332.07 | 129.94 |
| 329.72 | 643.04 |
| 327.36 | 587.14 |
| 325.01 | 3.21   |
| 322.65 | 589.15 |
| 322.65 | 295.45 |
| 322.65 | 287.75 |
| 320.30 | 212.70 |
| 320.30 | 5.77   |
| 320.30 | 3.21   |
| 315.59 | 674.74 |
| 315.59 | 636.99 |
| 315.59 | 586.04 |
| 315.59 | 405.14 |
| 315.59 | 366.28 |
| 315.59 | 29.32  |
| 313.23 | 709.29 |
| 313.23 | 13.01  |
| 310.88 | 181.08 |
| 310.88 | 74.14  |
| 306.17 | 600.79 |
| 306.17 | 5.59   |
| 303.81 | 499.99 |
| 303.81 | 324.59 |

|        |        |
|--------|--------|
| 303.81 | 316.43 |
| 301.46 | 499.25 |
| 301.46 | 5.32   |
| 299.10 | 619.12 |
| 299.10 | 397.81 |
| 296.75 | 513.82 |
| 294.39 | 386.63 |
| 294.39 | 14.48  |
| 294.39 | 3.30   |
| 292.04 | 472.31 |
| 292.04 | 173.57 |
| 292.04 | 10.17  |
| 289.68 | 378.47 |
| 287.33 | 26.30  |
| 287.33 | 6.69   |
| 287.33 | 2.84   |
| 284.97 | 447.66 |
| 284.97 | 58.47  |
| 284.97 | 2.75   |
| 282.61 | 528.58 |
| 282.61 | 250.91 |
| 282.61 | 149.83 |
| 282.61 | 130.13 |
| 282.61 | 124.26 |
| 280.26 | 620.03 |
| 277.90 | 483.95 |
| 277.90 | 166.42 |
| 277.90 | 95.40  |
| 275.55 | 533.25 |
| 273.19 | 285.92 |
| 270.84 | 507.50 |
| 270.84 | 15.03  |
| 268.48 | 487.43 |
| 266.13 | 579.53 |
| 266.13 | 3.85   |
| 263.77 | 473.59 |
| 263.77 | 418.98 |
| 263.77 | 192.26 |
| 263.77 | 72.40  |
| 263.77 | 69.65  |
| 263.77 | 19.24  |
| 263.77 | 5.13   |
| 259.06 | 522.53 |
| 259.06 | 504.93 |
| 259.06 | 456.73 |



|        |        |
|--------|--------|
| 259.06 | 449.58 |
| 259.06 | 413.20 |
| 259.06 | 56.27  |
| 256.71 | 8.98   |
| 256.71 | 7.97   |
| 256.71 | 3.57   |
| 254.35 | 405.69 |
| 254.35 | 309.28 |
| 252.00 | 538.66 |
| 252.00 | 376.09 |
| 252.00 | 302.32 |
| 252.00 | 4.95   |
| 249.64 | 459.66 |
| 249.64 | 444.91 |
| 249.64 | 258.24 |
| 249.64 | 209.76 |
| 249.64 | 52.33  |
| 247.29 | 467.36 |
| 247.29 | 3.67   |
| 244.93 | 402.39 |
| 244.93 | 319.73 |
| 244.93 | 188.41 |
| 244.93 | 4.49   |
| 242.58 | 5.04   |
| 240.22 | 459.30 |
| 240.22 | 449.03 |
| 240.22 | 381.77 |
| 240.22 | 129.85 |
| 237.87 | 464.25 |
| 237.87 | 461.77 |
| 237.87 | 411.74 |
| 237.87 | 4.03   |
| 235.51 | 488.07 |
| 235.51 | 466.35 |
| 235.51 | 420.44 |
| 235.51 | 388.64 |
| 235.51 | 62.96  |
| 233.16 | 471.21 |
| 233.16 | 416.78 |
| 233.16 | 278.77 |
| 230.80 | 485.60 |
| 230.80 | 462.96 |
| 230.80 | 4.95   |
| 230.80 | 3.67   |
| 228.45 | 422.28 |

|        |        |
|--------|--------|
| 228.45 | 272.81 |
| 228.45 | 5.04   |
| 226.09 | 231.57 |
| 223.74 | 471.39 |
| 223.74 | 234.87 |
| 223.74 | 18.69  |
| 221.38 | 376.91 |
| 221.38 | 263.56 |
| 221.38 | 252.01 |
| 221.38 | 10.36  |
| 219.03 | 578.25 |
| 219.03 | 403.58 |
| 219.03 | 288.94 |
| 219.03 | 5.68   |
| 216.67 | 416.23 |
| 216.67 | 253.57 |
| 216.67 | 43.25  |
| 216.67 | 28.87  |
| 214.32 | 302.78 |
| 214.32 | 126.19 |
| 211.96 | 338.43 |
| 211.96 | 287.38 |
| 211.96 | 19.15  |
| 211.96 | 4.49   |
| 211.96 | 4.40   |
| 209.61 | 486.24 |
| 209.61 | 344.93 |
| 207.25 | 349.06 |
| 207.25 | 19.98  |
| 207.25 | 8.06   |
| 204.90 | 369.49 |
| 204.90 | 337.42 |
| 204.90 | 336.04 |
| 204.90 | 11.00  |
| 202.54 | 338.33 |
| 202.54 | 292.97 |
| 202.54 | 3.48   |
| 200.19 | 357.03 |
| 200.19 | 73.04  |
| 200.19 | 4.49   |
| 197.83 | 471.12 |
| 197.83 | 167.06 |
| 197.83 | 18.60  |
| 197.83 | 15.58  |
| 195.48 | 445.19 |

|        |        |
|--------|--------|
| 195.48 | 413.94 |
| 195.48 | 407.89 |
| 195.48 | 357.03 |
| 195.48 | 346.49 |
| 195.48 | 313.87 |
| 195.48 | 104.47 |
| 195.48 | 7.51   |
| 195.48 | 6.87   |
| 193.12 | 417.97 |
| 193.12 | 416.87 |
| 193.12 | 19.89  |
| 193.12 | 10.63  |
| 193.12 | 6.51   |
| 193.12 | 3.21   |
| 190.77 | 406.97 |
| 190.77 | 326.88 |
| 190.77 | 312.58 |
| 190.77 | 244.86 |
| 190.77 | 212.51 |
| 190.77 | 172.01 |
| 188.41 | 351.62 |
| 188.41 | 285.27 |
| 188.41 | 224.43 |
| 188.41 | 165.13 |
| 188.41 | 7.33   |
| 186.05 | 351.80 |
| 186.05 | 218.74 |
| 186.05 | 62.31  |
| 183.70 | 415.59 |
| 183.70 | 312.67 |
| 183.70 | 297.55 |
| 183.70 | 158.17 |
| 183.70 | 136.54 |
| 181.34 | 352.81 |
| 181.34 | 315.42 |
| 181.34 | 312.31 |
| 178.99 | 374.71 |
| 178.99 | 342.09 |
| 178.99 | 324.13 |
| 178.99 | 234.60 |
| 178.99 | 193.18 |
| 178.99 | 88.89  |
| 178.99 | 3.39   |
| 176.63 | 410.00 |
| 176.63 | 89.90  |

|        |        |
|--------|--------|
| 176.63 | 36.56  |
| 176.63 | 4.31   |
| 174.28 | 391.30 |
| 174.28 | 363.99 |
| 174.28 | 204.54 |
| 171.92 | 282.25 |
| 171.92 | 206.28 |
| 171.92 | 12.19  |
| 171.92 | 10.63  |
| 169.57 | 268.32 |
| 169.57 | 154.14 |
| 167.21 | 399.92 |
| 167.21 | 285.92 |
| 167.21 | 269.05 |
| 167.21 | 85.04  |
| 167.21 | 30.24  |
| 164.86 | 319.82 |
| 164.86 | 302.87 |
| 164.86 | 287.75 |
| 164.86 | 264.66 |
| 164.86 | 245.14 |
| 164.86 | 177.96 |
| 164.86 | 119.77 |
| 164.86 | 14.48  |
| 162.50 | 197.58 |
| 162.50 | 125.45 |
| 162.50 | 72.95  |
| 160.15 | 389.56 |
| 160.15 | 376.73 |
| 160.15 | 342.27 |
| 160.15 | 305.07 |
| 160.15 | 293.43 |
| 160.15 | 196.11 |
| 160.15 | 16.86  |
| 160.15 | 6.14   |
| 157.79 | 255.77 |
| 157.79 | 246.42 |
| 157.79 | 242.94 |
| 157.79 | 237.07 |
| 157.79 | 5.22   |
| 155.44 | 233.96 |
| 155.44 | 52.05  |
| 155.44 | 14.39  |
| 153.08 | 310.57 |
| 153.08 | 276.11 |

|        |        |
|--------|--------|
| 153.08 | 243.85 |
| 153.08 | 78.63  |
| 153.08 | 6.96   |
| 153.08 | 2.47   |
| 150.73 | 37.57  |
| 150.73 | 24.83  |
| 148.37 | 211.78 |
| 148.37 | 120.23 |
| 148.37 | 71.57  |
| 148.37 | 10.91  |
| 143.66 | 368.48 |
| 143.66 | 219.75 |
| 143.66 | 30.70  |
| 141.31 | 274.64 |
| 141.31 | 200.60 |
| 141.31 | 188.87 |
| 141.31 | 43.16  |
| 141.31 | 7.79   |
| 141.31 | 5.77   |
| 138.95 | 279.59 |
| 138.95 | 254.94 |
| 138.95 | 217.28 |
| 138.95 | 203.07 |
| 138.95 | 165.78 |
| 138.95 | 132.42 |
| 138.95 | 84.95  |
| 138.95 | 80.55  |
| 136.60 | 306.17 |
| 136.60 | 280.60 |
| 136.60 | 223.33 |
| 136.60 | 195.83 |
| 136.60 | 106.58 |
| 136.60 | 3.21   |
| 134.24 | 299.66 |
| 134.24 | 162.39 |
| 131.89 | 319.82 |
| 131.89 | 259.43 |
| 131.89 | 31.89  |
| 131.89 | 20.89  |
| 131.89 | 18.88  |
| 131.89 | 12.10  |
| 129.53 | 209.67 |
| 129.53 | 173.66 |
| 129.53 | 112.26 |
| 129.53 | 11.91  |

|        |        |
|--------|--------|
| 129.53 | 5.41   |
| 127.18 | 300.21 |
| 127.18 | 243.58 |
| 127.18 | 229.47 |
| 127.18 | 210.50 |
| 127.18 | 119.59 |
| 127.18 | 17.87  |
| 127.18 | 11.27  |
| 124.82 | 225.62 |
| 124.82 | 207.38 |
| 124.82 | 157.71 |
| 124.82 | 11.82  |
| 124.82 | 8.43   |
| 122.47 | 204.72 |
| 122.47 | 106.67 |
| 122.47 | 92.65  |
| 122.47 | 22.63  |
| 122.47 | 3.12   |
| 120.11 | 208.21 |
| 120.11 | 138.93 |
| 120.11 | 122.71 |
| 120.11 | 15.40  |
| 120.11 | 11.64  |
| 120.11 | 11.36  |
| 120.11 | 9.26   |
| 120.11 | 3.57   |
| 117.76 | 233.04 |
| 117.76 | 203.26 |
| 117.76 | 190.52 |
| 117.76 | 184.65 |
| 117.76 | 184.10 |
| 117.76 | 124.17 |
| 117.76 | 21.08  |
| 117.76 | 13.65  |
| 117.76 | 10.81  |
| 117.76 | 7.88   |
| 117.76 | 4.58   |
| 115.40 | 231.48 |
| 115.40 | 206.83 |
| 115.40 | 197.76 |
| 115.40 | 154.60 |
| 115.40 | 42.61  |
| 115.40 | 41.42  |
| 115.40 | 12.65  |
| 115.40 | 6.32   |

|        |        |
|--------|--------|
| 115.40 | 1.28   |
| 113.05 | 248.44 |
| 113.05 | 164.13 |
| 113.05 | 59.02  |
| 113.05 | 15.67  |
| 110.69 | 186.58 |
| 110.69 | 92.74  |
| 110.69 | 12.00  |
| 110.69 | 5.13   |
| 110.69 | 4.77   |
| 110.69 | 3.39   |
| 108.34 | 177.32 |
| 108.34 | 168.89 |
| 108.34 | 166.60 |
| 108.34 | 156.89 |
| 108.34 | 140.67 |
| 108.34 | 129.40 |
| 108.34 | 91.55  |
| 108.34 | 9.53   |
| 105.98 | 211.41 |
| 105.98 | 209.76 |
| 105.98 | 195.83 |
| 105.98 | 194.55 |
| 105.98 | 187.13 |
| 105.98 | 165.04 |
| 105.98 | 137.28 |
| 105.98 | 133.15 |
| 105.98 | 127.20 |
| 105.98 | 109.88 |
| 105.98 | 50.04  |
| 105.98 | 14.57  |
| 105.98 | 7.79   |
| 105.98 | 5.50   |
| 103.63 | 235.51 |
| 103.63 | 143.23 |
| 103.63 | 140.48 |
| 103.63 | 130.13 |
| 103.63 | 53.61  |
| 101.27 | 249.35 |
| 101.27 | 207.11 |
| 101.27 | 207.01 |
| 101.27 | 154.41 |
| 101.27 | 144.24 |
| 101.27 | 98.70  |
| 101.27 | 33.27  |

|        |        |
|--------|--------|
| 101.27 | 20.80  |
| 101.27 | 11.82  |
| 98.92  | 172.37 |
| 98.92  | 148.09 |
| 98.92  | 110.06 |
| 98.92  | 104.93 |
| 98.92  | 53.15  |
| 98.92  | 21.63  |
| 98.92  | 5.04   |
| 98.92  | 1.10   |
| 96.56  | 236.16 |
| 96.56  | 205.91 |
| 96.56  | 204.54 |
| 96.56  | 188.78 |
| 96.56  | 179.71 |
| 96.56  | 126.83 |
| 96.56  | 81.65  |
| 96.56  | 73.86  |
| 96.56  | 68.09  |
| 96.56  | 27.68  |
| 96.56  | 15.95  |
| 96.56  | 11.64  |
| 96.56  | 4.58   |
| 96.56  | 2.02   |
| 94.20  | 134.80 |
| 94.20  | 124.17 |
| 94.20  | 47.19  |
| 94.20  | 41.70  |
| 94.20  | 29.97  |
| 94.20  | 13.38  |
| 94.20  | 7.97   |
| 94.20  | 2.93   |
| 94.20  | 1.83   |
| 91.85  | 228.00 |
| 91.85  | 135.63 |
| 91.85  | 55.53  |
| 91.85  | 32.62  |
| 91.85  | 4.86   |
| 91.85  | 4.03   |
| 89.49  | 209.85 |
| 89.49  | 194.46 |
| 89.49  | 173.47 |
| 89.49  | 170.82 |
| 89.49  | 167.79 |
| 89.49  | 150.93 |



|       |        |
|-------|--------|
| 89.49 | 92.10  |
| 89.49 | 42.89  |
| 89.49 | 41.42  |
| 89.49 | 14.39  |
| 89.49 | 13.47  |
| 89.49 | 10.08  |
| 89.49 | 1.19   |
| 87.14 | 145.52 |
| 87.14 | 119.41 |
| 87.14 | 107.13 |
| 87.14 | 11.36  |
| 87.14 | 1.19   |
| 84.78 | 189.51 |
| 84.78 | 174.57 |
| 84.78 | 153.50 |
| 84.78 | 151.11 |
| 84.78 | 150.66 |
| 84.78 | 122.89 |
| 84.78 | 121.15 |
| 84.78 | 25.66  |
| 84.78 | 16.04  |
| 84.78 | 3.67   |
| 82.43 | 120.69 |
| 82.43 | 112.08 |
| 82.43 | 104.74 |
| 82.43 | 95.03  |
| 82.43 | 90.54  |
| 82.43 | 50.86  |
| 82.43 | 38.03  |
| 82.43 | 27.22  |
| 82.43 | 18.79  |
| 82.43 | 2.57   |
| 82.43 | 1.83   |
| 82.43 | 1.37   |
| 80.07 | 206.56 |
| 80.07 | 133.15 |
| 80.07 | 128.02 |
| 80.07 | 105.29 |
| 80.07 | 103.28 |
| 80.07 | 91.00  |
| 80.07 | 66.26  |
| 80.07 | 28.77  |
| 80.07 | 16.31  |
| 80.07 | 4.49   |
| 77.72 | 150.01 |

|       |        |
|-------|--------|
| 77.72 | 149.56 |
| 77.72 | 130.95 |
| 77.72 | 96.68  |
| 77.72 | 94.02  |
| 77.72 | 74.32  |
| 77.72 | 73.77  |
| 77.72 | 54.89  |
| 77.72 | 40.87  |
| 77.72 | 33.63  |
| 77.72 | 2.84   |
| 77.72 | 1.10   |
| 75.36 | 182.55 |
| 75.36 | 144.70 |
| 75.36 | 97.50  |
| 75.36 | 66.26  |
| 75.36 | 62.77  |
| 75.36 | 13.65  |
| 75.36 | 4.86   |
| 75.36 | 1.65   |
| 75.36 | 1.28   |
| 73.01 | 132.60 |
| 73.01 | 128.48 |
| 73.01 | 117.39 |
| 73.01 | 90.91  |
| 73.01 | 59.38  |
| 73.01 | 56.82  |
| 73.01 | 10.36  |
| 73.01 | 4.86   |
| 73.01 | 3.02   |
| 70.65 | 199.50 |
| 70.65 | 188.87 |
| 70.65 | 142.32 |
| 70.65 | 140.67 |
| 70.65 | 131.32 |
| 70.65 | 128.75 |
| 70.65 | 104.47 |
| 70.65 | 89.26  |
| 70.65 | 84.03  |
| 70.65 | 39.59  |
| 70.65 | 14.11  |
| 70.65 | 12.00  |
| 70.65 | 8.43   |
| 70.65 | 4.49   |
| 70.65 | 1.19   |
| 68.30 | 146.62 |

|       |        |
|-------|--------|
| 68.30 | 100.53 |
| 68.30 | 96.68  |
| 68.30 | 93.93  |
| 68.30 | 81.93  |
| 68.30 | 76.98  |
| 68.30 | 76.15  |
| 68.30 | 55.35  |
| 68.30 | 35.37  |
| 68.30 | 7.97   |
| 68.30 | 6.78   |
| 68.30 | 4.67   |
| 68.30 | 3.94   |
| 65.94 | 119.68 |
| 65.94 | 113.72 |
| 65.94 | 111.89 |
| 65.94 | 108.04 |
| 65.94 | 101.72 |
| 65.94 | 54.16  |
| 65.94 | 23.73  |
| 65.94 | 17.59  |
| 65.94 | 5.32   |
| 65.94 | 2.57   |
| 63.59 | 136.63 |
| 63.59 | 134.89 |
| 63.59 | 116.02 |
| 63.59 | 83.12  |
| 63.59 | 34.27  |
| 63.59 | 30.70  |
| 63.59 | 22.63  |
| 63.59 | 17.69  |
| 63.59 | 15.30  |
| 63.59 | 13.01  |
| 63.59 | 10.36  |
| 63.59 | 6.05   |
| 61.23 | 145.34 |
| 61.23 | 103.28 |
| 61.23 | 99.06  |
| 61.23 | 92.56  |
| 61.23 | 72.30  |
| 61.23 | 68.09  |
| 61.23 | 63.05  |
| 61.23 | 36.66  |
| 61.23 | 30.97  |
| 61.23 | 26.94  |
| 61.23 | 12.28  |

|       |        |
|-------|--------|
| 61.23 | 1.56   |
| 61.23 | 1.37   |
| 61.23 | 1.19   |
| 58.88 | 149.01 |
| 58.88 | 106.85 |
| 58.88 | 102.36 |
| 58.88 | 93.47  |
| 58.88 | 89.81  |
| 58.88 | 64.51  |
| 58.88 | 63.51  |
| 58.88 | 62.13  |
| 58.88 | 54.43  |
| 58.88 | 35.74  |
| 58.88 | 33.54  |
| 58.88 | 22.91  |
| 58.88 | 18.05  |
| 58.88 | 11.82  |
| 58.88 | 4.67   |
| 56.52 | 116.11 |
| 56.52 | 114.00 |
| 56.52 | 107.40 |
| 56.52 | 99.15  |
| 56.52 | 93.66  |
| 56.52 | 72.67  |
| 56.52 | 64.97  |
| 56.52 | 49.12  |
| 56.52 | 48.02  |
| 56.52 | 28.77  |
| 56.52 | 9.81   |
| 56.52 | 9.62   |
| 56.52 | 8.61   |
| 56.52 | 4.22   |
| 56.52 | 3.30   |
| 56.52 | 1.74   |
| 56.52 | 1.10   |
| 54.17 | 117.30 |
| 54.17 | 104.47 |
| 54.17 | 100.35 |
| 54.17 | 98.88  |
| 54.17 | 92.92  |
| 54.17 | 80.28  |
| 54.17 | 76.34  |
| 54.17 | 71.11  |
| 54.17 | 64.06  |
| 54.17 | 57.73  |

|       |        |
|-------|--------|
| 54.17 | 49.67  |
| 54.17 | 46.64  |
| 54.17 | 42.34  |
| 54.17 | 28.96  |
| 54.17 | 26.12  |
| 54.17 | 18.24  |
| 54.17 | 18.14  |
| 54.17 | 18.14  |
| 54.17 | 17.78  |
| 54.17 | 12.37  |
| 54.17 | 8.98   |
| 54.17 | 8.43   |
| 54.17 | 8.43   |
| 54.17 | 6.69   |
| 54.17 | 5.32   |
| 54.17 | 4.77   |
| 54.17 | 1.74   |
| 51.81 | 121.33 |
| 51.81 | 117.02 |
| 51.81 | 95.31  |
| 51.81 | 83.76  |
| 51.81 | 80.09  |
| 51.81 | 64.15  |
| 51.81 | 62.96  |
| 51.81 | 49.21  |
| 51.81 | 49.12  |
| 51.81 | 21.81  |
| 51.81 | 19.06  |
| 51.81 | 16.04  |
| 51.81 | 8.34   |
| 51.81 | 7.97   |
| 51.81 | 7.79   |
| 51.81 | 5.32   |
| 51.81 | 4.22   |
| 51.81 | 4.22   |
| 51.81 | 3.21   |
| 51.81 | 2.75   |
| 51.81 | 1.10   |
| 49.46 | 109.97 |
| 49.46 | 99.70  |
| 49.46 | 93.93  |
| 49.46 | 64.61  |
| 49.46 | 35.92  |
| 49.46 | 8.16   |
| 49.46 | 6.05   |

|       |        |
|-------|--------|
| 49.46 | 5.22   |
| 49.46 | 4.49   |
| 47.10 | 88.71  |
| 47.10 | 85.22  |
| 47.10 | 81.74  |
| 47.10 | 74.96  |
| 47.10 | 74.87  |
| 47.10 | 73.40  |
| 47.10 | 66.81  |
| 47.10 | 66.53  |
| 47.10 | 64.51  |
| 47.10 | 59.47  |
| 47.10 | 55.17  |
| 47.10 | 40.69  |
| 47.10 | 39.04  |
| 47.10 | 37.48  |
| 47.10 | 22.54  |
| 47.10 | 15.03  |
| 47.10 | 7.24   |
| 47.10 | 6.51   |
| 47.10 | 2.75   |
| 47.10 | 2.75   |
| 44.75 | 120.32 |
| 44.75 | 109.42 |
| 44.75 | 88.98  |
| 44.75 | 84.22  |
| 44.75 | 81.83  |
| 44.75 | 70.75  |
| 44.75 | 58.10  |
| 44.75 | 50.22  |
| 44.75 | 48.57  |
| 44.75 | 47.10  |
| 44.75 | 46.83  |
| 44.75 | 42.98  |
| 44.75 | 35.28  |
| 44.75 | 29.42  |
| 44.75 | 19.34  |
| 44.75 | 15.95  |
| 44.75 | 15.21  |
| 44.75 | 11.55  |
| 44.75 | 10.63  |
| 44.75 | 6.87   |
| 44.75 | 6.41   |
| 44.75 | 5.50   |
| 44.75 | 3.67   |

|       |       |
|-------|-------|
| 44.75 | 3.39  |
| 44.75 | 3.02  |
| 42.39 | 95.21 |
| 42.39 | 86.78 |
| 42.39 | 80.55 |
| 42.39 | 75.51 |
| 42.39 | 71.20 |
| 42.39 | 68.09 |
| 42.39 | 54.07 |
| 42.39 | 46.46 |
| 42.39 | 44.26 |
| 42.39 | 40.96 |
| 42.39 | 29.60 |
| 42.39 | 28.32 |
| 42.39 | 20.99 |
| 42.39 | 20.34 |
| 42.39 | 19.34 |
| 42.39 | 12.10 |
| 42.39 | 11.55 |
| 42.39 | 9.53  |
| 42.39 | 2.20  |
| 42.39 | 1.65  |
| 40.04 | 88.80 |
| 40.04 | 88.62 |
| 40.04 | 86.78 |
| 40.04 | 45.54 |
| 40.04 | 40.23 |
| 40.04 | 29.78 |
| 40.04 | 29.32 |
| 40.04 | 17.87 |
| 40.04 | 15.40 |
| 40.04 | 8.71  |
| 40.04 | 8.71  |
| 40.04 | 5.41  |
| 40.04 | 5.32  |
| 40.04 | 4.77  |
| 40.04 | 3.21  |
| 40.04 | 3.21  |
| 40.04 | 1.28  |
| 37.68 | 85.04 |
| 37.68 | 71.11 |
| 37.68 | 64.24 |
| 37.68 | 59.84 |
| 37.68 | 59.11 |
| 37.68 | 57.37 |

|       |       |
|-------|-------|
| 37.68 | 50.04 |
| 37.68 | 47.56 |
| 37.68 | 44.63 |
| 37.68 | 44.26 |
| 37.68 | 40.50 |
| 37.68 | 37.21 |
| 37.68 | 36.84 |
| 37.68 | 27.40 |
| 37.68 | 21.26 |
| 37.68 | 20.62 |
| 37.68 | 14.57 |
| 37.68 | 13.56 |
| 37.68 | 12.00 |
| 37.68 | 11.09 |
| 37.68 | 11.00 |
| 37.68 | 9.62  |
| 37.68 | 6.05  |
| 37.68 | 5.77  |
| 37.68 | 5.32  |
| 37.68 | 3.94  |
| 37.68 | 3.76  |
| 37.68 | 3.57  |
| 37.68 | 3.48  |
| 37.68 | 3.02  |
| 35.33 | 86.32 |
| 35.33 | 77.62 |
| 35.33 | 77.16 |
| 35.33 | 76.52 |
| 35.33 | 66.07 |
| 35.33 | 65.34 |
| 35.33 | 58.28 |
| 35.33 | 56.54 |
| 35.33 | 52.05 |
| 35.33 | 50.04 |
| 35.33 | 49.67 |
| 35.33 | 49.39 |
| 35.33 | 41.88 |
| 35.33 | 40.41 |
| 35.33 | 40.05 |
| 35.33 | 36.93 |
| 35.33 | 36.84 |
| 35.33 | 35.56 |
| 35.33 | 31.71 |
| 35.33 | 31.16 |
| 35.33 | 29.51 |



|       |       |
|-------|-------|
| 35.33 | 28.68 |
| 35.33 | 26.58 |
| 35.33 | 25.02 |
| 35.33 | 23.00 |
| 35.33 | 19.34 |
| 35.33 | 19.06 |
| 35.33 | 16.68 |
| 35.33 | 14.20 |
| 35.33 | 11.27 |
| 35.33 | 9.16  |
| 35.33 | 7.97  |
| 35.33 | 7.70  |
| 35.33 | 6.32  |
| 35.33 | 6.32  |
| 35.33 | 5.96  |
| 35.33 | 5.77  |
| 35.33 | 2.93  |
| 32.97 | 75.24 |
| 32.97 | 68.36 |
| 32.97 | 65.89 |
| 32.97 | 63.14 |
| 32.97 | 61.12 |
| 32.97 | 57.64 |
| 32.97 | 53.33 |
| 32.97 | 47.01 |
| 32.97 | 43.90 |
| 32.97 | 42.61 |
| 32.97 | 40.78 |
| 32.97 | 37.94 |
| 32.97 | 37.48 |
| 32.97 | 33.17 |
| 32.97 | 31.80 |
| 32.97 | 30.97 |
| 32.97 | 30.24 |
| 32.97 | 30.15 |
| 32.97 | 27.49 |
| 32.97 | 23.92 |
| 32.97 | 22.45 |
| 32.97 | 21.54 |
| 32.97 | 18.88 |
| 32.97 | 16.31 |
| 32.97 | 13.93 |
| 32.97 | 13.29 |
| 32.97 | 10.17 |
| 32.97 | 9.26  |

|       |        |
|-------|--------|
| 32.97 | 8.52   |
| 32.97 | 8.16   |
| 32.97 | 7.61   |
| 32.97 | 4.95   |
| 32.97 | 2.38   |
| 32.97 | 1.28   |
| 32.97 | 1.19   |
| 30.62 | 100.62 |
| 30.62 | 76.70  |
| 30.62 | 75.60  |
| 30.62 | 67.26  |
| 30.62 | 61.67  |
| 30.62 | 58.01  |
| 30.62 | 53.24  |
| 30.62 | 46.28  |
| 30.62 | 43.99  |
| 30.62 | 43.44  |
| 30.62 | 41.42  |
| 30.62 | 32.53  |
| 30.62 | 32.44  |
| 30.62 | 24.01  |
| 30.62 | 17.78  |
| 30.62 | 16.31  |
| 30.62 | 14.20  |
| 30.62 | 11.45  |
| 30.62 | 10.81  |
| 30.62 | 9.62   |
| 30.62 | 8.80   |
| 30.62 | 8.43   |
| 30.62 | 8.43   |
| 30.62 | 6.87   |
| 30.62 | 6.60   |
| 30.62 | 6.51   |
| 30.62 | 6.32   |
| 30.62 | 5.68   |
| 30.62 | 5.50   |
| 30.62 | 3.76   |
| 30.62 | 1.65   |
| 30.62 | 1.65   |
| 30.62 | 1.19   |
| 28.26 | 67.45  |
| 28.26 | 51.78  |
| 28.26 | 48.48  |
| 28.26 | 47.56  |
| 28.26 | 47.19  |

|       |       |
|-------|-------|
| 28.26 | 45.64 |
| 28.26 | 44.54 |
| 28.26 | 43.16 |
| 28.26 | 42.34 |
| 28.26 | 40.50 |
| 28.26 | 38.31 |
| 28.26 | 36.75 |
| 28.26 | 33.72 |
| 28.26 | 31.16 |
| 28.26 | 25.84 |
| 28.26 | 25.20 |
| 28.26 | 25.02 |
| 28.26 | 23.92 |
| 28.26 | 23.73 |
| 28.26 | 23.55 |
| 28.26 | 23.28 |
| 28.26 | 22.54 |
| 28.26 | 20.99 |
| 28.26 | 20.71 |
| 28.26 | 17.23 |
| 28.26 | 16.50 |
| 28.26 | 16.22 |
| 28.26 | 15.30 |
| 28.26 | 14.30 |
| 28.26 | 12.83 |
| 28.26 | 10.45 |
| 28.26 | 10.36 |
| 28.26 | 9.90  |
| 28.26 | 7.42  |
| 28.26 | 6.69  |
| 28.26 | 5.13  |
| 28.26 | 4.67  |
| 28.26 | 3.57  |
| 28.26 | 3.48  |
| 28.26 | 3.12  |
| 28.26 | 1.74  |
| 28.26 | 1.01  |
| 28.26 | 0.92  |
| 25.91 | 84.68 |
| 25.91 | 81.01 |
| 25.91 | 64.24 |
| 25.91 | 52.14 |
| 25.91 | 48.48 |
| 25.91 | 48.11 |
| 25.91 | 44.90 |

|       |       |
|-------|-------|
| 25.91 | 43.90 |
| 25.91 | 43.71 |
| 25.91 | 43.16 |
| 25.91 | 42.15 |
| 25.91 | 34.27 |
| 25.91 | 31.80 |
| 25.91 | 31.80 |
| 25.91 | 31.34 |
| 25.91 | 28.96 |
| 25.91 | 27.77 |
| 25.91 | 26.58 |
| 25.91 | 26.48 |
| 25.91 | 25.38 |
| 25.91 | 25.20 |
| 25.91 | 22.27 |
| 25.91 | 19.98 |
| 25.91 | 19.98 |
| 25.91 | 17.87 |
| 25.91 | 15.67 |
| 25.91 | 15.49 |
| 25.91 | 15.12 |
| 25.91 | 12.19 |
| 25.91 | 11.73 |
| 25.91 | 10.45 |
| 25.91 | 9.81  |
| 25.91 | 9.62  |
| 25.91 | 9.53  |
| 25.91 | 9.35  |
| 25.91 | 8.80  |
| 25.91 | 6.51  |
| 25.91 | 6.41  |
| 25.91 | 4.49  |
| 25.91 | 3.76  |
| 25.91 | 3.76  |
| 25.91 | 3.39  |
| 25.91 | 2.57  |
| 25.91 | 2.38  |
| 25.91 | 2.29  |
| 25.91 | 2.02  |
| 25.91 | 1.28  |
| 23.55 | 67.08 |
| 23.55 | 59.29 |
| 23.55 | 59.11 |
| 23.55 | 57.73 |
| 23.55 | 50.22 |





|      |      |
|------|------|
| 9.42 | 0.00 |
| 9.42 | 0.00 |
| 9.42 | 0.00 |
| 7.07 | 0.00 |
| 7.07 | 0.00 |
| 7.07 | 0.00 |
| 7.07 | 0.00 |
| 7.07 | 0.00 |
| 7.07 | 0.00 |
| 7.07 | 0.00 |
| 7.07 | 0.00 |
| 7.07 | 0.00 |
| 7.07 | 0.00 |
| 7.07 | 0.00 |
| 7.07 | 0.00 |
| 7.07 | 0.00 |
| 7.07 | 0.00 |
| 4.71 | 0.00 |
| 4.71 | 0.00 |
| 4.71 | 0.00 |
| 4.71 | 0.00 |
| 4.71 | 0.00 |
| 4.71 | 0.00 |
| 4.71 | 0.00 |
| 4.71 | 0.00 |
| 4.71 | 0.00 |
| 4.71 | 0.00 |
| 4.71 | 0.00 |
| 4.71 | 0.00 |
| 4.71 | 0.00 |
| 4.71 | 0.00 |
| 4.71 | 0.00 |
| 4.71 | 0.00 |
| 4.71 | 0.00 |
| 4.71 | 0.00 |
| 4.71 | 0.00 |
| 2.36 | 0.00 |
| 2.36 | 0.00 |
| 2.36 | 0.00 |
| 2.36 | 0.00 |
| 2.36 | 0.00 |
| 2.36 | 0.00 |
| 2.36 | 0.00 |
| 2.36 | 0.00 |
| 2.36 | 0.00 |
| 2.36 | 0.00 |
| 2.36 | 0.00 |
| 2.36 | 0.00 |
| 2.36 | 0.00 |
| 2.36 | 0.00 |
| 2.36 | 0.00 |
| 2.36 | 0.00 |
| 2.36 | 0.00 |
| 2.36 | 0.00 |
| 2.36 | 0.00 |
| 0.00 | 0.92 |
| 0.00 | 0.92 |
| 0.00 | 0.92 |
| 0.00 | 0.92 |
| 0.00 | 0.92 |





































| Spacer Sequence       | Strand | Location | PAM | Fitness     |
|-----------------------|--------|----------|-----|-------------|
| TTTGTAACAACTGATATTA   | -      | 21       | AGG | 1.842554804 |
| ATACACATGTAACAGAGAAA  | -      | 138      | TGG | 1.98228312  |
| ATACACATGTAACAGAGAAA  | -      | 138      | TGG | 0.236699678 |
| AGATGAAAAAACGACTATAA  | -      | 165      | AGG | 0.521481308 |
| AGATGAAAAAACGACTATAA  | -      | 165      | AGG | 1.170246589 |
| GCATACACACATAAGTTTAT  | -      | 237      | TGG | 0.872525824 |
| GCATACACACATAAGTTTAT  | -      | 237      | TGG | 2.017110256 |
| AAGTTACTACTCACACACTA  | -      | 259      | AGG | 2.193078397 |
| ATTTAATGATTCTGCAGCTG  | +      | 308      | AGG | 0.0981197   |
| GAAATCCTATGCAAGGCAGT  | -      | 331      | AGG | 0.015334935 |
| TGCCAAGGAAATCCTATGCA  | -      | 338      | AGG | 0.01173533  |
| TGCCAAGGAAATCCTATGCA  | -      | 338      | AGG | 0.016950689 |
| AACCCTCTATCAACATAGCT  | +      | 390      | TGG | 0.042210951 |
| AAATAAAAAGATGCAACAAT  | -      | 399      | GGG | 0.929846464 |
| AAAATAAAAAGATGCAACAA  | -      | 400      | TGG | 0.356818909 |
| ATTTGCTATCCTTGAATTGA  | +      | 461      | TGG | 0.109581959 |
| AAACAATCAAGAGAAAAACA  | -      | 500      | AGG | 0.210321008 |
| TAATAGAACTATCAAGTAAA  | -      | 556      | AGG | 0.024383309 |
| TAATAGAACTATCAAGTAAA  | -      | 556      | AGG | 0.87911233  |
| GATTACTTACGTAATGCGAA  | +      | 676      | AGG | 0.01802427  |
| GATTACTTACGTAATGCGAA  | +      | 676      | AGG | 1.900082343 |
| TTCAAAGTTTtagTATCTAT  | -      | 698      | AGG | 0.304824297 |
| GACACCAATTTCTTCAGAAA  | -      | 756      | GGG | 0.008854973 |
| TGACACCAATTTCTTCAGAA  | -      | 757      | AGG | 0.02544085  |
| ACTTTATCTAACATGATACA  | +      | 804      | CGG | 0.700321068 |
| ACTTTATCTAACATGATACA  | +      | 804      | CGG | 1.541214127 |
| CTTTATCTAACATGATACAC  | +      | 805      | GGG | 1.462660823 |
| GAGAACAAAACCATCCTACC  | +      | 827      | CGG | 2.028958337 |
| AAATAAATACCATTTATTAC  | -      | 830      | CGG | 2.25675309  |
| CCATCCTACCCGTAATAAA   | +      | 837      | TGG | 0.610023454 |
| TTAGAATTGACACCTCAAGA  | +      | 873      | AGG | 1.342393732 |
| TTAGAATTGACACCTCAAGA  | +      | 873      | AGG | 1.539540001 |
| AAGAAAGTTTTAACTTAAGG  | +      | 930      | AGG | 0.006991302 |
| AAGAAAGTTTTAACTTAAGG  | +      | 930      | AGG | 0.064405813 |
| ACTTAAGGAGGAACAACAAA  | +      | 942      | TGG | 0.053874742 |
| TTGATTTTCGTGCCACTGTGC | -      | 993      | GGG | 0.808790763 |
| GTTGATTTTCGTGCCACTGTG | -      | 994      | CGG | 0.517319968 |
| AGCAATTCACACCCGCACAG  | +      | 998      | TGG | 0.926880404 |
| AGCAATTCACACCCGCACAG  | +      | 998      | TGG | 0.438618933 |
| AGCAATTCACACCCGCACAG  | +      | 998      | TGG | 0.477633726 |
| TTTTAATAACCTCAACATCT  | -      | 1070     | TGG | 0.764004295 |
| ACTCGACGACCAAGATGTTG  | +      | 1077     | AGG | 0.937041579 |
| AGTTATTCAAAAATCACGAA  | +      | 1154     | AGG | 0.137971112 |
| GTGAATTGCTAGTAGTGTGT  | -      | 1181     | TGG | 0.860534158 |



|                        |   |      |     |             |
|------------------------|---|------|-----|-------------|
| ATTAATTATGCTCGTAAGAA   | + | 1241 | CGG | 1.178202785 |
| ATTAATTATGCTCGTAAGAA   | + | 1241 | CGG | 1.589966515 |
| GAAACAATCTTTATAAACGC   | + | 1308 | AGG | 2.04472733  |
| GAATTAGCTATCATAACTTC   | + | 1365 | TGG | 1.132267499 |
| TTATCTAATTGTTTATCGAT   | + | 1389 | TGG | 1.982913666 |
| TTATCTAATTGTTTATCGAT   | + | 1389 | TGG | 0.897513298 |
| ATTGGAGCATGCAAATAACT   | + | 1407 | TGG | 0.679914918 |
| ATTGGAGCATGCAAATAACT   | + | 1407 | TGG | 0.4347188   |
| TCTGATGAATATTCATCTCT   | - | 1424 | CGG | 1.370691594 |
| AACACCTATTAACGTAGTAT   | - | 1449 | TGG | 2.005405833 |
| AACACCTATTAACGTAGTAT   | - | 1449 | TGG | 1.165561226 |
| GATTCCAATACTACGTTAAT   | + | 1461 | AGG | 0.865242564 |
| GATTCCAATACTACGTTAAT   | + | 1461 | AGG | 1.890582808 |
| ATTTAAGGTGGTTATTCTTA   | - | 1698 | TGG | 0.081356303 |
| TTACAAACAAAATCGAACAT   | + | 1802 | CGG | 2.133005507 |
| AAGAGAGTTATATAAAGCTT   | + | 1876 | TGG | 0.931011885 |
| AAGAGAGTTATATAAAGCTT   | + | 1876 | TGG | 1.600393868 |
| TAAAAAGCGTTTTAGCGCTT   | + | 1903 | GGG | 1.591400024 |
| TACAAGTGTACTIONACAAGTA | + | 1966 | CGG | 0.091967994 |
| TACAAGTGTACTIONACAAGTA | + | 1966 | CGG | 0.29182152  |
| AAACATGTTGCGATGATGTC   | + | 2048 | AGG | 0.98331686  |
| TGTTCCATGCTTTTTCAATT   | - | 2091 | TGG | 0.044131162 |
| TCATCCAAATTGAAAAAGCA   | + | 2103 | TGG | 1.905464161 |
| TCATCCAAATTGAAAAAGCA   | + | 2103 | TGG | 0.015605993 |
| GCACGTTGCATAATCATTTC   | - | 2116 | TGG | 0.178983866 |
| ACTAAGACATCAATTTTAGT   | + | 2246 | TGG | 0.035683875 |
| ACTAAGACATCAATTTTAGT   | + | 2246 | TGG | 0.178983866 |
| GCAAAGATCATTAAACAAAA   | + | 2276 | CGG | 2.22340206  |
| AAACAAAACGGTATAAACAT   | + | 2288 | CGG | 0.068427115 |
| AACAAAACGGTATAAACATC   | + | 2289 | GGG | 0.725384922 |
| CCACACCCTTGCGTTTAATA   | - | 2334 | AGG | 1.451201572 |
| CGGATTCCTTATTAACGCA    | + | 2344 | AGG | 0.087824381 |
| CGGATTCCTTATTAACGCA    | + | 2344 | AGG | 0.112632867 |
| CGTTCCATTGAATACTGTGT   | - | 2368 | AGG | 1.108418359 |
| CATGCCTACACAGTATTCAA   | + | 2380 | TGG | 0.707344109 |
| ACATCAATCACACATTCGGA   | + | 2429 | CGG | 2.264359466 |
| AGTAAGACGCCAAAAGTAAC   | + | 2465 | AGG | 0.410336062 |
| TACTTTGTTAACAAGTTTTT   | + | 2501 | AGG | 0.217185956 |
| AGAAAAACAAACAACTTAAT   | + | 2524 | AGG | 0.971055409 |
| AGAAAAACAAACAACTTAAT   | + | 2524 | AGG | 0.009129424 |
| TCACAACTGCCATTGTGATG   | - | 2568 | AGG | 0.680916881 |
| TCACAACTGCCATTGTGATG   | - | 2568 | AGG | 0.455241572 |
| AATGGCAGTTGTGACGTGGA   | + | 2593 | AGG | 1.193005944 |
| CAGTTGTGACGTGGAAGGTT   | + | 2598 | TGG | 0.583643041 |
| AACGCCCTGCTACTAATCAC   | - | 2629 | AGG | 1.894595101 |

|                       |   |      |     |             |
|-----------------------|---|------|-----|-------------|
| GAAAACCTGTGATTAGTAGC  | + | 2640 | AGG | 2.012084652 |
| ATTTTCAGCATCTTTCGGTA  | - | 2681 | TGG | 0.007917638 |
| TTTGTTTCGGCGAACTTCAAA | - | 2724 | AGG | 0.266263296 |
| TTTGTTTCGGCGAACTTCAAA | - | 2724 | AGG | 1.776068205 |
| TTATTTGCTAATAGTTTGTT  | - | 2738 | CGG | 1.832181388 |
| TTATTTGCTAATAGTTTGTT  | - | 2738 | CGG | 1.352854638 |
| ATAACAACATTATACACGAA  | + | 2773 | AGG | 0.012118012 |
| TATGTGTTTTCTGGTGTTGG  | - | 2808 | TGG | 0.092410148 |
| CTATATGTGTTTTCTGGTGT  | - | 2811 | TGG | 0.033689964 |
| TCGCCTCTATATGTGTTTTTC | - | 2817 | TGG | 1.83912407  |
| TCGCCTCTATATGTGTTTTTC | - | 2817 | TGG | 1.641662617 |
| ACACCAGAAAACACATATAG  | + | 2830 | AGG | 2.216231917 |
| ACACCAGAAAACACATATAG  | + | 2830 | AGG | 0.470451663 |
| ACACAAATCCATCAATTGTT  | + | 2890 | TGG | 1.950201531 |
| ACACAAATCCATCAATTGTT  | + | 2890 | TGG | 0.158417397 |
| GTAGAAGTACAGTATACAAC  | + | 2918 | TGG | 0.682085335 |
| GTAGAAGTACAGTATACAAC  | + | 2918 | TGG | 0.740335384 |
| TATTACCGCAAAGATAATTT  | + | 2947 | AGG | 0.185568557 |
| TACATTGATTATTCACCAAC  | + | 2983 | AGG | 1.095182923 |
| TACATTGATTATTCACCAAC  | + | 2983 | AGG | 0.799756148 |
| TCTGATTAATATTTCTAAAT  | + | 3009 | TGG | 0.270639697 |
| TCTGATTAATATTTCTAAAT  | + | 3009 | TGG | 0.371409208 |
| GCATAAAAAATGGTATTAGG  | + | 3051 | AGG | 0.769834014 |
| GCATAAAAAATGGTATTAGG  | + | 3051 | AGG | 0.041542512 |
| TGAAGCATAATACTGCTACT  | - | 3088 | AGG | 0.642183487 |
| TGAAGCATAATACTGCTACT  | - | 3088 | AGG | 1.091419997 |
| GCTGTAGTGAAGTATAGAAA  | - | 3134 | CGG | 0.947675675 |
| GCTGTAGTGAAGTATAGAAA  | - | 3134 | CGG | 0.463921391 |
| TTCTATACTTCACTACAGCA  | + | 3154 | TGG | 1.672152277 |
| TTCTATACTTCACTACAGCA  | + | 3154 | TGG | 1.883561231 |
| CACTACAGCATGGTCAATTG  | + | 3164 | CGG | 0.145026453 |
| ACTACAGCATGGTCAATTGC  | + | 3165 | GGG | 0.054790979 |
| ATAAAAAAACTGCTACTTGT  | + | 3239 | TGG | 0.622895595 |
| ATAAAAAAACTGCTACTTGT  | + | 3239 | TGG | 0.987600304 |
| GTTCAATATAAAACGAAAAA  | + | 3300 | CGG | 2.369701915 |
| CAATATAAAACGAAAAACGG  | + | 3303 | AGG | 1.401373643 |
| GTCAAGATGTATTACGAAAT  | + | 3328 | AGG | 1.802203353 |
| GTCAAGATGTATTACGAAAT  | + | 3328 | AGG | 0.286601948 |
| CGCAAAAATATTCATGTTAA  | + | 3361 | CGG | 2.035375253 |
| ATTCATTTTAAAAGGTCATA  | + | 3399 | TGG | 0.094031379 |
| TTCATTTTAAAAGGTCATAT  | + | 3400 | GGG | 0.242114179 |
| ACGACATAAGCATGTTTAAT  | - | 3441 | TGG | 0.969363116 |
| ACGACATAAGCATGTTTAAT  | - | 3441 | TGG | 2.197578171 |
| AGATGAGAATGACTTAGATA  | + | 3480 | TGG | 1.561091543 |
| CAATCCATTCATCTATTGCT  | - | 3503 | TGG | 0.736299714 |

|                        |   |      |     |             |
|------------------------|---|------|-----|-------------|
| TTAACCAAGCAATAGATGAA   | + | 3515 | TGG | 1.853727982 |
| TTAACCAAGCAATAGATGAA   | + | 3515 | TGG | 0.915652147 |
| TGAAGAGAACACAGACGAAC   | + | 3540 | AGG | 0.934706524 |
| TAATTAAGTTCATGAAA      | + | 3569 | TGG | 1.951855415 |
| TAATTAAGTTCATGAAA      | + | 3569 | TGG | 0.010477908 |
| TAACTTAGTTCATGAAATGGT  | + | 3573 | AGG | 2.161577567 |
| TAACTTAGTTCATGAAATGGT  | + | 3573 | AGG | 2.281766364 |
| TAACTTATATCATTTCGTCAT  | + | 3617 | AGG | 0.516685048 |
| AACTTATATCATTTCGTCATA  | + | 3618 | GGG | 1.796816999 |
| GGTTTGTTAGTTATATAAAT   | - | 3630 | TGG | 0.039294779 |
| ATATCTGAATTGTTATCAGT   | - | 3651 | TGG | 0.978786515 |
| ATATCTGAATTGTTATCAGT   | - | 3651 | TGG | 0.224934175 |
| CACAAATAGAAATAGAGCTA   | + | 3699 | GGG | 0.029754351 |
| AATAGAGCTAGGGAGTTTAA   | + | 3709 | CGG | 1.099779618 |
| AATAGAGCTAGGGAGTTTAA   | + | 3709 | CGG | 0.022291922 |
| AGCTAGGGAGTTTAAACGGTA  | + | 3714 | TGG | 0.494706958 |
| AGCTAGGGAGTTTAAACGGTA  | + | 3714 | TGG | 0.206519845 |
| GGAAGAAGCGAGTATCAATA   | + | 3735 | TGG | 0.166446349 |
| GACAGAAACTATTGAGTACG   | + | 3786 | AGG | 0.165128275 |
| GACAGAAACTATTGAGTACG   | + | 3786 | AGG | 1.870251699 |
| GAGGAGGTAGAACATGACTG   | + | 3805 | AGG | 0.334857825 |
| AGTATGCTTACTTTTTCTTG   | - | 3823 | TGG | 0.76306924  |
| ATATCGCTGAGAAAAATAAA   | + | 3882 | AGG | 2.005826287 |
| TTCTATAAATTTGCAGTATA   | + | 3908 | CGG | 0.064443919 |
| TTTATCTCTGTAGCAAACG    | - | 3935 | TGG | 1.548447374 |
| TTCGTCATTGACATTAACGA   | + | 3980 | AGG | 1.299405276 |
| CATTAACGAAGGTGGAACAA   | + | 3991 | CGG | 0.892776733 |
| CATTAACGAAGGTGGAACAA   | + | 3991 | CGG | 0.729165646 |
| GGAACAACGGTACTGACGA    | + | 4004 | AGG | 1.28563592  |
| TTTTTTACCTCAAATTTTAC   | + | 4075 | AGG | 1.866477979 |
| TTTTTTACCTCAAATTTTAC   | + | 4075 | AGG | 1.071412984 |
| TCTCCCAATCATTAAACGT    | - | 4186 | TGG | 0.222481824 |
| AAAAACCAACGTTTAAATGAT  | + | 4197 | TGG | 0.07349579  |
| AAAAACCAACGTTTAAATGATT | + | 4198 | GGG | 2.190935965 |
| GTCAGTATGTACAGATTAAT   | + | 4241 | AGG | 0.9949378   |
| GTCAGTATGTACAGATTAAT   | + | 4241 | AGG | 0.032556959 |
| CATGACCTGTAATAACAAAG   | - | 4272 | TGG | 0.090356589 |
| AAATTCCAATTTGTTATTAC   | + | 4283 | AGG | 0.011316319 |
| AAATTCCAATTTGTTATTAC   | + | 4283 | AGG | 0.031127629 |
| GCGCTTCAATAGTGATAGTA   | - | 4338 | GGG | 0.934706524 |
| TGCGCTTCAATAGTGATAGT   | - | 4339 | AGG | 1.99299798  |
| TGCGCTTCAATAGTGATAGT   | - | 4339 | AGG | 1.100723856 |
| CTCAAAGTGATGTGTTAGCT   | + | 4404 | AGG | 0.952953891 |
| TCAAAGTGATGTGTTAGCTA   | + | 4405 | GGG | 0.206998732 |
| ATTGAAGAATTTGATGATAA   | + | 4433 | CGG | 0.583783255 |

|                       |   |      |     |             |
|-----------------------|---|------|-----|-------------|
| ATTGAAGAATTTGATGATAA  | + | 4433 | CGG | 0.080107868 |
| TCTACTACGTCGGTAATGCT  | - | 4546 | AGG | 1.584338664 |
| TCTACTACGTCGGTAATGCT  | - | 4546 | AGG | 1.748149869 |
| GTAGTAGAAGCAATTAGAAA  | + | 4577 | TGG | 0.33219648  |
| GTAGTAGAAGCAATTAGAAA  | + | 4577 | TGG | 0.150079639 |
| CTAAAAATTAATTAAGGA    | + | 4603 | CGG | 0.100862584 |
| TATTTAATTATGAAAATCAC  | + | 4626 | AGG | 2.102527862 |
| AATCAAGAAAAGTTTTATAA  | + | 4674 | CGG | 1.600478916 |
| AAGTTTTATAACGGCTCAGC  | + | 4683 | AGG | 0.130399526 |
| ATTGAATTAGTTACTCGATT  | + | 4866 | AGG | 1.386447847 |
| ATTGAATTAGTTACTCGATT  | + | 4866 | AGG | 0.008942274 |
| TTGGTATCAAATCTAAGCT   | - | 4889 | AGG | 2.02093772  |
| AAACTTACCAATAAGATCAT  | - | 4908 | TGG | 1.920946877 |
| AAACTTACCAATAAGATCAT  | - | 4908 | TGG | 0.237552957 |
| TTTGATACCAATGATCTTAT  | + | 4917 | TGG | 0.872542647 |
| TTTGATACCAATGATCTTAT  | + | 4917 | TGG | 0.658672372 |
| TATTGGTAAGTTTTGTCACT  | + | 4934 | TGG | 2.01835959  |
| TTTGTCACTTGGTATTGAAA  | + | 4945 | TGG | 1.784974966 |
| TGGAAATTC AATGAAGATGA | + | 4965 | AGG | 0.94214446  |
| ATTTATTAACCTTACAAAA   | + | 5009 | AGG | 1.588342846 |
| TTTATTAACCTTACAAAA    | + | 5010 | GGG | 1.327787917 |
| TGCTTATCTGTCTTCGGAAT  | - | 5036 | AGG | 0.490819638 |
| GCTTTTTGCTTATCTGTCTT  | - | 5042 | CGG | 1.482453323 |
| CAAAAAGCTGAAGAAAATAA  | + | 5073 | CGG | 1.83138708  |
| CAAAAAGCTGAAGAAAATAA  | + | 5073 | CGG | 0.022234021 |
| AAAAAGCTGAAGAAAATAAC  | + | 5074 | GGG | 1.848403527 |
| AATTGGCCACTGCTTTCAAA  | - | 5117 | TGG | 1.993070495 |
| AATTGGCCACTGCTTTCAAA  | - | 5117 | TGG | 1.779899809 |
| AGCAATCCATTTGAAAGCAG  | + | 5127 | TGG | 1.851351244 |
| CTTGGTCGTCATATCCAAAT  | - | 5134 | TGG | 0.16860799  |
| TTTGAAAGCAGTGGCCAATT  | + | 5136 | TGG | 0.032424613 |
| CACCTTAAAACGCTAAATCT  | - | 5152 | TGG | 1.577032458 |
| AAGTACCGTCGTTATCTTTC  | - | 5203 | TGG | 1.782272915 |
| AAGTACCGTCGTTATCTTTC  | - | 5203 | TGG | 0.86108495  |
| AGATACCAGAAAGATAACGA  | + | 5214 | CGG | 1.714943424 |
| ACTTATTCCGTCGTTGCTAC  | + | 5238 | TGG | 0.42605942  |
| CACATTGACTTACTAGAAAA  | + | 5280 | CGG | 2.003291536 |
| AAAAGCAGAAGTAGAGGTTC  | + | 5312 | CGG | 0.204635338 |
| ATAGATAGTTTTTTATTGTC  | - | 5315 | CGG | 0.102579686 |
| GTAGAGATATAGAACTTCAC  | + | 5383 | TGG | 0.430010543 |
| GTAGAGATATAGAACTTCAC  | + | 5383 | TGG | 0.024121488 |
| TAGAGATATAGAACTTCACT  | + | 5384 | GGG | 0.809745173 |
| AATTTTCTAGTTGATTCTAC  | - | 5396 | TGG | 2.008000401 |
| AAAATTATTACAAACAGAAT  | + | 5429 | TGG | 0.238468293 |
| ACTGTTCTATGAAAGTTGCA  | + | 5488 | AGG | 1.835560638 |

|                        |   |      |     |             |
|------------------------|---|------|-----|-------------|
| CTGTTCTATGAAAGTTGCAA   | + | 5489 | GGG | 1.26938297  |
| CGGAAAGCCTCACGCAGACC   | + | 5642 | TGG | 0.038909536 |
| CGGAAAGCCTCACGCAGACC   | + | 5642 | TGG | 0.328193478 |
| CTGGCACATTATGAAGCAGT   | + | 5661 | CGG | 0.89198276  |
| CTGGCACATTATGAAGCAGT   | + | 5661 | CGG | 0.442595972 |
| CTAATACATGTTTGTCTATAG  | - | 5695 | TGG | 1.006459999 |
| CACAACGAGCAACATGCGAT   | + | 5751 | TGG | 1.798125679 |
| CACAACGAGCAACATGCGAT   | + | 5751 | TGG | 1.645567344 |
| TTATCCACGAGTCATGCAAG   | - | 5782 | TGG | 0.012574423 |
| AATGTTGAAAGGAGAGAAAA   | + | 5843 | AGG | 0.019454768 |
| CTTCCGCCAAGATGACGATT   | - | 5883 | AGG | 1.803606648 |
| AGCACTCCTAATCGTCATCT   | + | 5893 | TGG | 0.591136729 |
| ACTCCTAATCGTCATCTTGG   | + | 5896 | CGG | 0.01532063  |
| TGCTATGCATGCTGTA AAAAG | + | 5932 | TGG | 2.069864768 |
| AAAAACCTGTATTA ACTAAA  | - | 5956 | CGG | 0.432721204 |
| AATCTCCGTTTAGTTAATAC   | + | 5967 | AGG | 1.912408912 |
| AATCTCCGTTTAGTTAATAC   | + | 5967 | AGG | 0.216713359 |
| TCAATTAGTTTGTCCGCCTA   | + | 5991 | TGG | 1.97341716  |
| TCAATTAGTTTGTCCGCCTA   | + | 5991 | TGG | 1.934730359 |
| TCAATTAGTTTGTCCGCCTA   | - | 5991 | TGG | 0.788430072 |
| AAAGTTACATTACAGCCCCCT  | + | 6034 | GGG | 0.3559502   |
| TAAAGTTACATTACAGCCCC   | - | 6035 | TGG | 1.174581619 |
| TAAAGTTACATTACAGCCCC   | + | 6035 | TGG | 0.275359794 |
| GTTAAAAGAATGTTAAAGTC   | - | 6108 | AGG | 1.45375754  |
| GAAAAACAAAGATTTGTTTC   | - | 6141 | GGG | 2.040614889 |
| AGAAAAACAAAGATTTGTTT   | - | 6142 | CGG | 2.284234651 |
| AGAAAAACAAAGATTTGTTT   | - | 6142 | CGG | 1.098360617 |
| TTAAAGTGATTTAAAACTG    | + | 6190 | AGG | 0.23734817  |
| TTAATAACCTAGTAAGGTTA   | - | 6263 | GGG | 0.285336598 |
| ATTAATAACCTAGTAAGGTT   | - | 6264 | AGG | 0.105611598 |
| TTAAAACCCCTAACCTTACT   | + | 6272 | AGG | 0.141014426 |
| TTAAAACCCCTAACCTTACT   | + | 6272 | AGG | 0.597791963 |
| TCGGTTGATTCTATATCTAA   | + | 6310 | CGG | 2.310523908 |
| TCGGTTGATTCTATATCTAA   | + | 6310 | CGG | 0.153206298 |
| GAATGACGGTATGAATATAT   | - | 6337 | CGG | 1.522479031 |
| GAATGACGGTATGAATATAT   | - | 6337 | CGG | 0.05769345  |
| GTTTTAAACCCAAAGAATGA   | - | 6351 | CGG | 1.068515721 |
| TCCTGCCGTAAATATAGAG    | - | 6373 | CGG | 0.018257552 |
| TAAAACCGCTCTATATTTAA   | + | 6384 | CGG | 0.021439948 |
| TTAAAAGAATAGCATCATT    | + | 6436 | TGG | 1.078814543 |
| TTAAAAGAATAGCATCATTT   | + | 6437 | GGG | 1.722125959 |
| TAAAAGAATAGCATCATTTG   | + | 6438 | GGG | 0.087969386 |
| TAATTATTTCAACAAATGAA   | + | 6470 | TGG | 0.025884026 |
| TAATTATTTCAACAAATGAA   | + | 6470 | TGG | 0.046774229 |
| TTATTTCAACAAATGAATGG   | + | 6473 | TGG | 0.247606138 |

|                       |   |          |             |
|-----------------------|---|----------|-------------|
| AAAATAATAGCATCATCTA   | - | 6502 TGG | 0.588773968 |
| AACTTTGAAGCTTCTAGAGC  | + | 6577 AGG | 0.137480361 |
| GAACCACAATTTTCTCTTCT  | - | 6585 AGG | 1.636738092 |
| GAACCACAATTTTCTCTTCT  | - | 6585 AGG | 0.043048848 |
| GGTTCTTGTAATTATTTTC   | + | 6619 AGG | 0.887785914 |
| GGTTCTTGTAATTATTTTC   | + | 6619 AGG | 0.020751753 |
| AAATAACTTTATCCACATAA  | + | 6704 AGG | 0.706220015 |
| AAATAACTTTATCCACATAA  | + | 6704 AGG | 0.942115155 |
| TAGAAACATTCTCTAAACT   | - | 6734 TGG | 2.530676224 |
| GTTTTAGAGAATGTTTCTAC  | + | 6754 AGG | 0.385749636 |
| ATGGATCCTATTTTAGGTAA  | - | 6795 AGG | 1.816196731 |
| ATAATTATGGATCCTATTTT  | - | 6801 AGG | 0.224478093 |
| TCAATACCTTTACCTAAAAT  | + | 6805 AGG | 0.28070451  |
| CCATTTGTTATCTCCTTTC   | - | 6863 TGG | 1.191118172 |
| ATAATAAAATTATAACCAGAA | + | 6865 AGG | 1.452405959 |
| ATAATAAAATTATAACCAGAA | + | 6865 AGG | 0.022062108 |
| CCAGAAAGGAGATAACGAAA  | + | 6879 TGG | 1.428844629 |
| CCAGAAAGGAGATAACGAAA  | + | 6879 TGG | 0.217893402 |
| AATTTAAGTGCTAAAGCTAA  | + | 6970 AGG | 0.966029157 |
| ATTTAAGTGCTAAAGCTAAA  | + | 6971 GGG | 0.689276962 |
| GCCAATTGTCAGGACGACTT  | - | 6992 AGG | 1.433167911 |
| GTGTATATTTGCCAATTGTC  | - | 7002 AGG | 0.540537378 |
| GTGTATATTTGCCAATTGTC  | - | 7002 AGG | 0.153869529 |
| GTAGTTAAACATATGAATGA  | + | 7048 TGG | 2.639991101 |
| GTAGTTAAACATATGAATGA  | + | 7048 TGG | 0.050952964 |
| GGACAAAAATCAATCAATAG  | + | 7069 TGG | 1.241572788 |
| GGACAAAAATCAATCAATAG  | + | 7069 TGG | 0.795109971 |
| TAGTGCGTTCAAGAACTTA   | + | 7086 TGG | 0.142019807 |
| ATACAAAAAGAGCTGAAAA   | + | 7129 CGG | 0.011245531 |
| TCCGAAAATGGCATTTCGGT  | - | 7173 TGG | 2.121290261 |
| TCCGAAAATGGCATTTCGGT  | - | 7173 TGG | 0.505823969 |
| AATAACAATACTAATAATGA  | + | 7312 TGG | 1.184424805 |
| TAATGATGGAAGTATATTGT  | + | 7326 CGG | 0.367166962 |
| AATGATGGAAGTATATTGTC  | + | 7327 GGG | 0.041419829 |
| AAGATTTTATTAAGCAAGA   | + | 7445 TGG | 0.061878714 |
| AAGATTTTATTAAGCAAGA   | + | 7445 TGG | 0.920943239 |
| CAAGATGGAATCAAGATTTT  | + | 7460 AGG | 1.041508744 |
| GAATCAAGATTTTAGGTTGG  | + | 7467 AGG | 1.638523796 |
| TTGATATCAAACAGCTGAA   | + | 7505 TGG | 0.038909536 |
| AACAGCTGAATGGTTAAACA  | + | 7515 CGG | 0.161754359 |
| AACAGCTGAATGGTTAAACA  | + | 7515 CGG | 0.027902233 |
| CTTAGACCAGAAACACTTTT  | + | 7552 TGG | 0.462269204 |
| CTTAGACCAGAAACACTTTT  | + | 7552 TGG | 0.588014899 |
| TCCAATTGATCCGTGCCAGT  | - | 7596 TGG | 1.598416104 |
| TCCAATTGATCCGTGCCAGT  | - | 7596 TGG | 1.729810082 |

|                         |   |      |     |             |
|-------------------------|---|------|-----|-------------|
| TGAAGTACGACGAAAGTTAT    | + | 7640 | TGG | 1.516236682 |
| GAAGTACGACGAAAGTTATT    | + | 7641 | GGG | 1.891212162 |
| CGACGAAAGTTATTGGGATT    | + | 7647 | AGG | 0.57252603  |
| CGAAAGTTATTGGGATTAGG    | + | 7650 | GGG | 0.016675515 |
| TTTATCTTTTCGCTGAATAG    | - | 7668 | TGG | 0.017630884 |
| AATCCTTTTTTCGACATGAGT   | - | 7713 | AGG | 0.181239197 |
| AATCCTTTTTTCGACATGAGT   | - | 7713 | AGG | 0.810391716 |
| CAACCTACTCATGTCGAAAA    | + | 7726 | AGG | 1.837938256 |
| GGATTGAAATGTGAGAGATG    | + | 7747 | TGG | 1.182511552 |
| CCATTCGGGTGTTTTTTAGT    | - | 7782 | AGG | 1.95975743  |
| CCATTCGGGTGTTTTTTAGT    | - | 7782 | AGG | 0.310883263 |
| CTTTATACTCGTAACCATT     | - | 7796 | GGG | 1.156605032 |
| TCTTTATACTCGTAACCATT    | - | 7797 | CGG | 0.733914352 |
| AATGGTTACGAGTATAAAGA    | + | 7816 | CGG | 2.197091802 |
| TTGCAAATGTGAAATCTATG    | + | 7839 | AGG | 0.401987074 |
| TGTACTTGTTTTTCATTTTG    | - | 7941 | TGG | 0.358920618 |
| TGTACTTGTTTTTCATTTTG    | - | 7941 | TGG | 0.184820296 |
| ACAGCAATAGAGTACGTACA    | + | 7990 | AGG | 1.869183594 |
| CCAAAATCATTAAATATTGCA   | + | 8029 | AGG | 2.106848983 |
| CCAAAATCATTAAATATTGCA   | + | 8029 | AGG | 0.0189428   |
| TTAATATTGCAAGGTTTCATA   | + | 8038 | CGG | 1.311855133 |
| TTAATATTGCAAGGTTTCATA   | + | 8038 | CGG | 0.749797276 |
| TTGCGATAGCGTATGCTAGG    | - | 8057 | TGG | 0.122287113 |
| CTTTTGCGATAGCGTATGCT    | - | 8060 | AGG | 1.339599741 |
| CTTTTGCGATAGCGTATGCT    | - | 8060 | AGG | 1.095951932 |
| CAAAAGCAGTCAAAGCTAAA    | + | 8093 | GGG | 0.205159372 |
| TTGATACGATCCATCAACAT    | - | 8124 | TGG | 1.163649676 |
| TTGATACGATCCATCAACAT    | - | 8124 | TGG | 1.862722302 |
| TATGCACATACCAATGTTGA    | + | 8130 | TGG | 1.619734148 |
| TTTACTTGACTAGATGATA     | + | 8229 | TGG | 0.4043043   |
| TTTACTTGACTAGATGATA     | + | 8229 | TGG | 1.735365307 |
| TTACTTGACTAGATGATAT     | + | 8230 | GGG | 0.482139903 |
| AACTAAATCAAATATGAAC     | + | 8351 | TGG | 1.987460672 |
| GCGAGAAAAGTAAGAGTAAT    | + | 8404 | CGG | 0.249264215 |
| GAGTAATCGGAGACGATTTTC   | + | 8417 | AGG | 0.537322164 |
| ATTTGAGGGAGCGAGATGCA    | + | 8432 | TGG | 1.446439381 |
| ATTTGAGGGAGCGAGATGCA    | + | 8432 | TGG | 1.715262047 |
| TTTAGTTTTTAAAAATTCTT    | - | 8442 | TGG | 0.9616593   |
| CGCTCAGAACTCATAGATG     | + | 8501 | AGG | 0.092557533 |
| GAAACTCATAGATGAGGCAC    | + | 8507 | AGG | 0.949156864 |
| TATAAGTAATATTTTTCTTT    | - | 8609 | CGG | 1.967544897 |
| TATAAGTAATATTTTTCTTT    | - | 8609 | CGG | 1.92314411  |
| TATTACTIONTATACCGAGAAGA | + | 8637 | TGG | 2.003579383 |
| TATTACTIONTATACCGAGAAGA | + | 8637 | TGG | 0.017064421 |
| AATGAAGTTTATTCGCTCAC    | + | 8700 | AGG | 1.492380709 |

|                       |   |      |     |             |
|-----------------------|---|------|-----|-------------|
| CTTTTATATGAGCAAGAGCT  | + | 8793 | AGG | 2.341646624 |
| TTTTATATGAGCAAGAGCTA  | + | 8794 | GGG | 1.783430028 |
| CAACGATATTTGATATTTAG  | + | 8824 | AGG | 1.722903372 |
| CGATATTTGATATTTAGAGG  | + | 8827 | TGG | 0.339574133 |
| GAAACGTTTCGAGGCACCTAT | + | 8877 | GGG | 1.433615147 |
| TTATGATTTGTATAAGCTGT  | - | 8936 | TGG | 0.708153556 |
| AATCATAAAGCGTATATACA  | + | 8967 | AGG | 0.579686139 |
| GCGCGCTCTAGATTTAACTT  | - | 8981 | AGG | 1.978939003 |
| GAAGAAAAAGAAAAGTGAAA  | + | 9068 | TGG | 0.008499656 |
| GAAGAAAAAGAAAAGTGAAA  | + | 9068 | TGG | 0.110243685 |
| AAAAAGAAAAGTGAAATGGT  | + | 9072 | TGG | 1.807506764 |
| AAAAAGAAAAGTGAAATGGT  | + | 9072 | TGG | 1.524710889 |
| TTAATTAAGTTATCGATATC  | - | 9098 | CGG | 0.482478247 |
| ACAGTATTAGACGCATGTAA  | + | 9138 | TGG | 0.337132303 |
| AGCTAGTTATTTCTGTAATT  | - | 9166 | TGG | 2.352310333 |
| ATAACTAGCTCAAAGCGTTA  | + | 9195 | TGG | 0.726360282 |
| ATAACTAGCTCAAAGCGTTA  | + | 9195 | TGG | 1.591494925 |
| AAAAATAATCATGCGAGTTG  | + | 9227 | AGG | 1.699891938 |
| TACTGATATTTCAACTTCTGT | - | 9289 | AGG | 0.039820641 |
| GGATATCGAAAAAGAAGCGC  | + | 9340 | TGG | 0.645988121 |
| GGATATCGAAAAAGAAGCGC  | + | 9340 | TGG | 0.096389532 |
| AATTAGAAATGTAAATGTAG  | + | 9415 | AGG | 1.55999447  |
| TCATGTTTCGGTAAATTTATA | - | 9457 | TGG | 1.815437037 |
| ATGAATTGATAAAAAAGAAC  | + | 9498 | GGG | 0.010802893 |
| AAAAAGAACGGGTAACTCC   | + | 9509 | TGG | 0.478587293 |
| AAAAAGAACGGGTAACTCC   | + | 9509 | TGG | 1.237323246 |
| ACTCTTTTTGCAACCATTCC  | - | 9511 | AGG | 0.432100637 |
| GAACGGGTAACTCCTGGAA   | + | 9514 | TGG | 1.652579061 |
| AAAAAGAGTACGTGGTGGCT  | + | 9541 | GGG | 0.245130077 |
| TCAGCTAAGCGCATGCCATA  | - | 9571 | AGG | 1.616514361 |
| TCAGCTAAGCGCATGCCATA  | - | 9571 | AGG | 0.689759957 |
| GAAGCCTTAAACGCACCTTA  | + | 9572 | TGG | 0.833775772 |
| GCTCTCTCGTTGCATAATTC  | - | 9614 | TGG | 0.099705686 |
| GGATCACGTGAATGTTTTTG  | - | 9712 | TGG | 1.045369535 |
| AACATTCACGTGATCCGTAC  | + | 9735 | TGG | 0.420930435 |
| AACATTCACGTGATCCGTAC  | + | 9735 | TGG | 0.061606765 |
| TCGCCGTATGTGTAATGTGC  | - | 9849 | TGG | 1.215782025 |
| TCGCCGTATGTGTAATGTGC  | - | 9849 | TGG | 1.49709072  |
| CAACCAGCACATTACACATA  | + | 9862 | CGG | 0.819189359 |
| CAACCAGCACATTACACATA  | + | 9862 | CGG | 1.911174974 |
| AGATTTTATTGAACAAGTAA  | + | 9900 | CGG | 1.200851818 |
| AGATTTTATTGAACAAGTAA  | + | 9900 | CGG | 0.075117021 |
| ATTGCAAATGCTAATTGTGG  | - | 9915 | TGG | 0.075771202 |
| CCACAATTAGCATTTGCAAT  | + | 9934 | AGG | 1.9791984   |
| CCACAATTAGCATTTGCAAT  | + | 9934 | AGG | 0.353178866 |



|                       |   |           |             |
|-----------------------|---|-----------|-------------|
| TCTAGAGCACCGTTAAAGAA  | + | 9976 TGG  | 1.385963706 |
| TCTAGAGCACCGTTAAAGAA  | + | 9976 TGG  | 2.086582469 |
| TTTACGCGCGTTATCTGTCA  | - | 10047 TGG | 0.960451179 |
| AATAAGCGCCATTCACTACA  | - | 10138 TGG | 0.027380785 |
| GCACATATCCATGTAGTGAA  | + | 10146 TGG | 0.278131128 |
| CATATCGTACCAGATTGGCA  | + | 10188 AGG | 1.605604349 |
| CATATCGTACCAGATTGGCA  | + | 10188 AGG | 0.947977787 |
| GGAATATATATAAAGCAACA  | + | 10245 TGG | 2.482228863 |
| ATATATAAAGCAACATGGTT  | + | 10250 TGG | 0.043787408 |
| AGCAACTAACTTTATTTTAG  | + | 10288 AGG | 1.502372683 |
| GAAAATCCGGAGCTATCACA  | + | 10379 AGG | 0.055488382 |
| AAAATCCGGAGCTATCACA   | + | 10380 GGG | 1.054448427 |
| TTTTCAACAGGATTTAGTGA  | + | 10412 TGG | 1.887112498 |
| GTCGAACACTTATTTGTATT  | - | 10435 TGG | 1.596587962 |
| CTTATCAAATACCGTGTCTT  | - | 10514 TGG | 0.033102143 |
| CTTATCAAATACCGTGTCTT  | - | 10514 TGG | 1.122232934 |
| AAAAGAAGTAACCAAAGACA  | + | 10519 CGG | 1.243926076 |
| GTTGTTTCAAATGTACGAGA  | + | 10552 TGG | 1.589187521 |
| TTTGAAATGTACGAGATGGA  | + | 10556 AGG | 1.617858509 |
| TTTGAAATGTACGAGATGGA  | + | 10556 AGG | 0.83525804  |
| AGTATAAAAGAATGTTTATA  | + | 10613 TGG | 0.195834764 |
| AGTATAAAAGAATGTTTATA  | + | 10613 TGG | 1.275368126 |
| AAGATATAGAATGCTTTGGT  | - | 10630 AGG | 0.116728608 |
| GTTTAAGATATAGAATGCTT  | - | 10634 TGG | 1.611812565 |
| GTTTAAGATATAGAATGCTT  | - | 10634 TGG | 1.0794617   |
| GATACAAAGACTTACTTTAT  | - | 10714 AGG | 0.482354725 |
| CAGTTTTAATACCGTATTCG  | - | 10810 TGG | 1.19416174  |
| TGAGGAAGAAGCCACGAATA  | + | 10815 CGG | 1.416307112 |
| TGAGGAAGAAGCCACGAATA  | + | 10815 CGG | 0.987329477 |
| CGACCTCTATGCTTGCAGTT  | - | 10853 TGG | 0.094841994 |
| AAGCATAGAGGTGCAAAAAG  | + | 10878 TGG | 1.92213108  |
| TCGTCCCACACTCGATATTT  | - | 10901 CGG | 1.686578735 |
| CGAGTGTGGGACGAATATAC  | + | 10926 AGG | 1.158639518 |
| CGAGTGTGGGACGAATATAC  | + | 10926 AGG | 0.455514186 |
| GGAAGAATACACGATGTTGT  | + | 10947 AGG | 0.818545812 |
| GGAAGAATACACGATGTTGT  | + | 10947 AGG | 0.865465895 |
| AGTTCACTATGAAAACACTCG | + | 10991 CGG | 0.969979361 |
| GTAGAACTTATGCAAAGTAC  | + | 11052 AGG | 0.743858777 |
| AAACAACAACGAAATATATG  | + | 11087 CGG | 1.160607579 |
| AAACAACAACGAAATATATG  | + | 11087 CGG | 1.890806441 |
| CCTATTACAGATTCATCGTC  | - | 11132 TGG | 1.753021032 |
| ATATCTATTGATGTTGTAAA  | + | 11190 TGG | 1.329316506 |
| ATATCTATTGATGTTGTAAA  | + | 11190 TGG | 0.598608247 |
| ATATAAAGATTTTATGTTTG  | + | 11219 AGG | 0.115950417 |
| TAACCTCACAGTCATATCTA  | - | 11275 AGG | 0.764904538 |

|                        |   |       |     |             |
|------------------------|---|-------|-----|-------------|
| TAACCTCACAGTCATATCTA   | - | 11275 | AGG | 1.617738787 |
| ATTTGAATCATCACATTTAT   | + | 11324 | TGG | 0.292022915 |
| ATTTGAATCATCACATTTAT   | + | 11324 | TGG | 0.038909536 |
| TGAATCATCACATTTATTGG   | + | 11327 | AGG | 2.469259018 |
| AACAGAATGAACTATGAAAC   | + | 11351 | AGG | 0.055121843 |
| AACAGAATGAACTATGAAAC   | + | 11351 | AGG | 2.386451544 |
| ACAGAATGAACTATGAAACA   | + | 11352 | GGG | 0.646011548 |
| CAGAATGAACTATGAAACAG   | + | 11353 | GGG | 0.155638144 |
| TAGCGTCCATTACACCTAGT   | - | 11361 | TGG | 1.810829329 |
| TAGCGTCCATTACACCTAGT   | - | 11361 | TGG | 2.016810951 |
| AACTAGGTGTAATGGACGCT   | + | 11379 | AGG | 1.006089432 |
| AAGCAACGTGATGAGCTTAT   | + | 11438 | TGG | 0.034982886 |
| GCAACGTGATGAGCTTATTG   | + | 11440 | GGG | 1.58750907  |
| AAGAGAACGCAACAAAGAGC   | + | 11476 | TGG | 1.195583926 |
| AAGAGAACGCAACAAAGAGC   | + | 11476 | TGG | 0.541491043 |
| TGGAGAAGAAAGCAAGTGCA   | + | 11496 | TGG | 1.722785817 |
| GGAGAAGAAAGCAAGTGCAT   | + | 11497 | GGG | 0.498042061 |
| ATAAACGAATTTGGCAAAGA   | + | 11552 | TGG | 2.517446982 |
| TGAAAGAGTTAAATTTGGAA   | + | 11575 | TGG | 1.215923001 |
| ATTAACAATAAAAACCTTTTA  | + | 11599 | TGG | 2.185373134 |
| ATTAACAATAAAAACCTTTTA  | + | 11599 | TGG | 2.154676203 |
| AAACAATAAAAACCTTTTATGG | + | 11602 | AGG | 1.176040727 |
| AAACAATAAAAACCTTTTATGG | + | 11602 | AGG | 0.442628615 |
| CGGATTGTTCTATTTGTTCA   | - | 11626 | CGG | 1.803255739 |
| ATACGCACTAGCACTTATAA   | - | 11646 | CGG | 2.509665075 |
| ATAAGTGCTAGTGCGTATAA   | + | 11667 | CGG | 0.122872219 |
| ATAAGTGCTAGTGCGTATAA   | + | 11667 | CGG | 0.25534383  |
| GTATAACGGCAATGACACAG   | + | 11681 | AGG | 1.641157848 |
| GTATAACGGCAATGACACAG   | + | 11681 | AGG | 0.744045618 |
| AGCGTTTGATGAAATACTTG   | + | 11744 | AGG | 1.98580123  |
| GCGTTTGATGAAATACTTGA   | + | 11745 | GGG | 0.112285235 |
| ATTCAACATTCAGTTAAAGA   | + | 11781 | AGG | 1.430722776 |
| ATTCAACATTCAGTTAAAGA   | + | 11781 | AGG | 1.817150159 |
| ATTGAACTTGATGAAGCAGT   | + | 11805 | AGG | 1.999950153 |
| TTGAACTTGATGAAGCAGTA   | + | 11806 | GGG | 0.013670918 |
| TGAAGCAGTAGGGATTATGA   | + | 11816 | CGG | 0.091967994 |
| TCAAGTTGTCTATAAATATG   | + | 11840 | AGG | 1.062529638 |
| AGTTGTCTATAAATATGAGG   | + | 11843 | AGG | 0.092918295 |
| CTATAAATATGAGGAGGCAC   | + | 11849 | AGG | 0.080250918 |
| AGAGTTATTACAAATACAAA   | + | 11907 | AGG | 1.262614445 |
| AGAGTTATTACAAATACAAA   | + | 11907 | AGG | 1.617524998 |
| CTATCTCGTAAGTTCAGCGT   | - | 11931 | TGG | 1.706062145 |
| CTATCTCGTAAGTTCAGCGT   | - | 11931 | TGG | 0.651086236 |
| ATGTAGTTGAATCCTTTGAA   | + | 11981 | TGG | 0.011290714 |
| CTTTGAATGGTTAATACAT    | + | 11994 | TGG | 0.684759798 |

|                         |   |       |     |             |
|-------------------------|---|-------|-----|-------------|
| CTTTGAATGGTTTAATACAT    | + | 11994 | TGG | 0.07874549  |
| CATTGAAAACGTTTAAGAAC    | + | 12011 | TGG | 0.774764724 |
| CATTGAAAACGTTTAAGAAC    | + | 12011 | TGG | 0.042466363 |
| TGTACGTCTAACGGCTTACC    | - | 12027 | TGG | 1.614745746 |
| TGATGAATTAGCTGACATGT    | + | 12069 | TGG | 1.306474665 |
| TGATGAATTAGCTGACATGT    | + | 12069 | TGG | 0.011205946 |
| TTGAGTATTGCGAATCAAGT    | + | 12100 | AGG | 0.803882895 |
| TTGAGTATTGCGAATCAAGT    | + | 12100 | AGG | 0.129768561 |
| TCACTATAACAATTGCTTGT    | - | 12254 | TGG | 1.933355451 |
| TCACTATAACAATTGCTTGT    | - | 12254 | TGG | 0.548685941 |
| TTTTGTATGCGTCAATGAGT    | - | 12308 | TGG | 1.09769302  |
| AGGAATCATGAAAGACAAGA    | + | 12358 | TGG | 1.910074834 |
| CAAGATGGAACAGCAGACGC    | + | 12373 | AGG | 1.19046623  |
| CAAGATGGAACAGCAGACGC    | + | 12373 | AGG | 0.496608552 |
| CATATTAGATCGAGTCAAGG    | + | 12415 | AGG | 0.359640683 |
| ACAACATTCAAAGATTCAAC    | + | 12466 | AGG | 2.01431675  |
| TCAAAGGTTTACAGTCGTTG    | + | 12525 | AGG | 1.065782944 |
| TCAGTTGTATGAAAATATAA    | + | 12618 | GGG | 0.084628241 |
| ATGAAAATATAAGGGAGTGT    | + | 12626 | GGG | 0.495015764 |
| GTTAAAATTA AAACTATTTT   | + | 12660 | AGG | 1.810603851 |
| GTTAAAATTA AAACTATTTT   | + | 12660 | AGG | 1.434650179 |
| AAAATTA AAACTATTTT CAGG | + | 12663 | TGG | 1.772493443 |
| AAAATTA AAACTATTTT CAGG | + | 12663 | TGG | 1.618636699 |
| GAAAGAATGACGAGTTTTAA    | + | 12729 | TGG | 1.799084488 |
| GAAAGAATGACGAGTTTTAA    | + | 12729 | TGG | 0.115172227 |
| GTATCTGTTTTAATATACGT    | - | 12767 | TGG | 0.325240338 |
| TGAATCAATCACACTTATTG    | + | 12809 | AGG | 1.21667599  |
| TGAATCAATCACACTTATTG    | + | 12809 | AGG | 1.28973668  |
| CTGAGAATTTTATTACATGA    | + | 12851 | CGG | 1.338744586 |
| CTGAGAATTTTATTACATGA    | + | 12851 | CGG | 0.719447919 |
| AGAGAACTTGTATTGAACAA    | + | 12980 | AGG | 1.646723123 |
| AGAGAACTTGTATTGAACAA    | + | 12980 | AGG | 0.844429574 |
| TTGAACAAAGGTTATATAGT    | + | 12992 | TGG | 0.664037008 |
| TGAACAAAGGTTATATAGTT    | + | 12993 | GGG | 1.785169514 |
| TATAGTTGGGATCAATGTTG    | + | 13006 | AGG | 0.00999789  |
| TATAGTTGGGATCAATGTTG    | + | 13006 | AGG | 1.138310895 |
| TTATTTTCAGTGTACTTTTT    | - | 13048 | GGG | 0.108449983 |
| ATTATTTTCAGTGTACTTTTT   | - | 13049 | CGG | 0.094793031 |
| ATTATTTTCAGTGTACTTTTT   | - | 13049 | CGG | 0.063552242 |
| TGAATTTTACAGTCCTATGA    | + | 13169 | TGG | 1.903766959 |
| TGAATTTTACAGTCCTATGA    | + | 13169 | TGG | 1.980106289 |
| ATATGAATGAACATGAATTA    | + | 13195 | AGG | 0.707918757 |
| TATGAATGAACATGAATTA     | + | 13196 | GGG | 1.763708794 |
| TCTCCAGTATCAATTA AACT   | - | 13220 | AGG | 0.412072112 |
| AGTTTAATTGATACTGGAGA    | + | 13239 | TGG | 1.180754767 |

|                          |   |       |     |             |
|--------------------------|---|-------|-----|-------------|
| GATTA AAAA ACTT AAAA ATA | + | 13269 | TGG | 0.215845532 |
| GCTGGAATACTGCGATTATT     | + | 13312 | CGG | 1.029054835 |
| TAAGTACCACTGTGTATAT      | - | 13350 | AGG | 1.418701545 |
| CTTGATGTACTTCTTTGTGT     | - | 13373 | TGG | 0.36483412  |
| CAACACAAAGAAGTACATCA     | + | 13390 | AGG | 2.118197182 |
| CAACACAAAGAAGTACATCA     | + | 13390 | AGG | 0.381313453 |
| ATAGCGCAGACATACAAGCT     | + | 13526 | AGG | 1.726027019 |
| AAAGTAAAAGTTAAGACGAT     | + | 13564 | TGG | 0.213683518 |
| TTCTTTACTTCGTATAAGAT     | - | 13599 | CGG | 0.049181654 |
| GATCTTATACGAAGTAAAGA     | + | 13617 | AGG | 1.997134855 |
| GCAAGTATATATTATGATGA     | + | 13718 | CGG | 0.225675309 |
| CTCAACTTTGCGAAGTCACT     | - | 13745 | CGG | 0.94139122  |
| CTCAACTTTGCGAAGTCACT     | - | 13745 | CGG | 0.462818692 |
| GAGTCAATTGTTAATATGAT     | + | 13836 | AGG | 0.014917498 |
| TGTATTAGCTGATGTAATAC     | + | 13880 | CGG | 2.391566412 |
| ATTGAATTGCTATCATATTC     | - | 13883 | CGG | 0.392385505 |
| ATTGAATTGCTATCATATTC     | - | 13883 | CGG | 0.050601564 |
| AGCAATTCAATTGCACAGTA     | + | 13911 | TGG | 0.010013484 |
| AGCAATTCAATTGCACAGTA     | + | 13911 | TGG | 0.914374097 |
| GAGTTTTCCCCTTGTGGTTT     | - | 13934 | CGG | 1.293742073 |
| GCAACGTTGCCGAAACCACA     | + | 13941 | AGG | 1.649764328 |
| GCAACGTTGCCGAAACCACA     | + | 13941 | AGG | 0.505823969 |
| GGCTTGAGAGAGCAAATAAA     | + | 13999 | AGG | 0.954512355 |
| GTATGCTCAGATGTTAAAAG     | + | 14021 | AGG | 0.008066611 |
| AAATCAATCGCAACAGAGAT     | + | 14054 | TGG | 0.01111701  |
| TTCTTAGAGTTATTGAAGAA     | + | 14094 | AGG | 1.841228611 |
| TATTGAAGAAAGGTTATAAC     | + | 14104 | AGG | 1.341325773 |
| ATTGAAGAAAGGTTATAACA     | + | 14105 | GGG | 1.6811477   |
| TTTCTGTTCAATTTAGAGTT     | - | 14132 | AGG | 0.133222868 |
| TTTCTGTTCAATTTAGAGTT     | - | 14132 | AGG | 1.825364756 |
| TCTTTTCTGCTAATTCATCA     | - | 14170 | CGG | 1.000608996 |
| GTAAGAATTATCTTAAGACG     | + | 14303 | TGG | 0.022642272 |
| AAGAATTATCTTAAGACGTG     | + | 14305 | GGG | 0.461355927 |
| AAACTACCCACCATATAGGC     | - | 14399 | AGG | 1.73847807  |
| AAACTACCCACCATATAGGC     | - | 14399 | AGG | 1.580955885 |
| AATTAAACTACCCACCATAT     | - | 14403 | AGG | 2.07232189  |
| AATTAAACTACCCACCATAT     | - | 14403 | AGG | 0.538969129 |
| TCACTTACTACCTGCCTATA     | + | 14405 | TGG | 1.849499947 |
| CTACGTTCAATAAATGTGAA     | - | 14455 | AGG | 0.053058458 |
| AATGCCCTACATCTTGTGC      | - | 14480 | AGG | 0.359913208 |
| AGCACAAACTTTTCTTGCTT     | - | 14575 | CGG | 1.059536597 |
| TTTGTGCTAGGACTCATAGA     | + | 14606 | GGG | 0.031127629 |
| TCATAGAGGGCAAGAGCCAA     | - | 14619 | CGG | 0.500960277 |
| TCATAGAGGGCAAGAGCCAA     | - | 14619 | CGG | 0.203702865 |
| TCATAGAGGGCAAGAGCCAA     | + | 14619 | CGG | 0.811912319 |

|                       |   |       |     |             |
|-----------------------|---|-------|-----|-------------|
| TCATAGAGGGCAAGAGCCAA  | + | 14619 | CGG | 0.275359794 |
| GACGCAGGGTATTCGACTAA  | + | 14654 | AGG | 0.309507673 |
| ATTCGACTAAAGGTAAGAGT  | + | 14664 | GGG | 0.200773206 |
| ACGCAATTTTTTCGTACCTTC | - | 14720 | CGG | 1.857704128 |
| ACGCAATTTTTTCGTACCTTC | - | 14720 | CGG | 0.778190721 |
| TAAGAATGACATTGAAATAG  | + | 14833 | AGG | 0.066785025 |
| AAGAATGACATTGAAATAGA  | + | 14834 | GGG | 1.957149663 |
| GCATTCTCGCTAGTTTAGA   | + | 14879 | TGG | 1.702042782 |
| GCATTCTCGCTAGTTTAGA   | + | 14879 | TGG | 0.833312564 |
| GGTATGAATAGAATGACGTT  | + | 14900 | AGG | 1.760149871 |
| GGTATGAATAGAATGACGTT  | + | 14900 | AGG | 0.173606784 |
| AAGATTGAACAAATAGATAA  | + | 14978 | AGG | 1.652809422 |
| CAAATAGATAAAGGTGACAG  | + | 14987 | TGG | 1.847770634 |
| CAAATAGATAAAGGTGACAG  | + | 14987 | TGG | 0.058364304 |
| ACAACCTCACGACGCAATAA  | + | 15028 | CGG | 1.708200245 |
| ACAACCTCACGACGCAATAA  | + | 15028 | CGG | 1.873747918 |
| TAAACTTAAATCTTTATATA  | + | 15068 | CGG | 1.448111428 |
| AGCAAACGCAAAAACAAGAT  | + | 15112 | TGG | 0.031992285 |
| TGGTTTATGTTAATTAATCA  | + | 15132 | CGG | 1.96701601  |
| AATCACGGAGCAAAGCGTAC  | + | 15147 | AGG | 0.116641756 |
| AATCACGGAGCAAAGCGTAC  | + | 15147 | AGG | 0.009886849 |
| CGAAAGATAGCAGACGAAGA  | + | 15219 | AGG | 0.560297319 |
| CGAAAGATAGCAGACGAAGA  | + | 15219 | AGG | 0.021886614 |
| ACACCTCAATATATACTTGC  | + | 15249 | TGG | 0.818994942 |
| ACACCTCAATATATACTTGC  | + | 15249 | TGG | 1.850518372 |
| ATACTTGCTGGTGCAACATT  | + | 15261 | AGG | 1.857046038 |
| ATAGAGTTAACTAACAATA   | + | 15306 | TGG | 1.47856237  |
| TATAATTCATTCATGTTATT  | + | 15351 | TGG | 0.321176663 |
| TATAATTCATTCATGTTATT  | + | 15351 | TGG | 0.840225736 |
| CATGTTATTTGGCGTTCAAG  | + | 15362 | TGG | 0.212505928 |
| GGCGTTCAAGTGGTTCAGAC  | + | 15372 | AGG | 2.158530237 |
| AGTGGTATAGGAGCTATACG  | + | 15408 | TGG | 1.67835197  |
| AGCGTCGTTAGCGCATGAAG  | + | 15461 | AGG | 0.977602093 |
| GAGATTAAGTCACGTTGTAG  | + | 15492 | TGG | 0.885191945 |
| AAGTCACGTTGTAGTGGAAC  | + | 15498 | TGG | 1.036722971 |
| AAGTCACGTTGTAGTGGAAC  | + | 15498 | TGG | 1.029606184 |
| TGGAACCTGGTGCAAGAATAT | + | 15512 | TGG | 1.238030692 |
| TGGAACCTGGTGCAAGAATAT | + | 15512 | TGG | 0.781574159 |
| TCAACAACCAATGCTCGGGA  | - | 15535 | TGG | 0.07295538  |
| ATCTTTCAACAACCAATGCT  | - | 15540 | CGG | 1.804105488 |
| ACCCTGACCATCCCAGCAT   | + | 15544 | TGG | 0.132750182 |
| GAAAATACAGATCCTAAAGC  | + | 15585 | AGG | 0.699789461 |
| TATTGTCATCGAGCTTAAAT  | - | 15604 | TGG | 0.027652689 |
| TAGATATAAAGAGTCTATTA  | + | 15656 | AGG | 1.578991037 |
| TAGATATAAAGAGTCTATTA  | + | 15656 | AGG | 0.043232818 |

|                      |   |           |             |
|----------------------|---|-----------|-------------|
| CGTTCATAGAACATACCTGA | - | 15671 TGG | 0.942213411 |
| CGTTCATAGAACATACCTGA | - | 15671 TGG | 2.246818741 |
| ATTAAGGCTTCAACACCATC | + | 15672 AGG | 1.977451965 |
| TTCTATGAACGTAATATCAA | + | 15699 CGG | 1.661363775 |
| TTCTATGAACGTAATATCAA | + | 15699 CGG | 3.126911806 |
| GGTATGTGGGTGTCTGGTGA | + | 15720 CGG | 0.517899342 |
| ATTCTCATTCAAATCAAAGT | - | 15738 CGG | 1.989280115 |
| ATTCTCATTCAAATCAAAGT | - | 15738 CGG | 1.966910021 |
| TACGATTAAAGCAGATGAAC | + | 15776 TGG | 0.096892374 |
| TTAATAGGACGAGGTATAGA | + | 15867 TGG | 0.448472934 |
| TTAATAGGACGAGGTATAGA | + | 15867 TGG | 1.346269947 |
| TGGTAACTTTTATTTTATTG | + | 15887 AGG | 1.921126963 |
| AATCATCAATAAACTTAAAT | - | 15904 TGG | 2.319707845 |
| AATTTAAGTTTATTGATGAT | + | 15922 TGG | 1.28372432  |
| AATTTAAGTTTATTGATGAT | + | 15922 TGG | 2.133299377 |
| ATTTAAGTTTATTGATGATT | + | 15923 GGG | 2.016928859 |
| AAAGATATTGTAAGTAGATA | + | 15957 TGG | 1.194353585 |
| AAAGATATTGTAAGTAGATA | + | 15957 TGG | 1.193225772 |
| CGCTGATAAAAAGTAACTAT | + | 16058 CGG | 2.061468487 |
| GCTGATAAAAAGTAACTATC | + | 16059 GGG | 1.71346068  |
| ACTTGTTCTTTATGATAATA | + | 16121 TGG | 0.562199563 |
| ACTTGTTCTTTATGATAATA | + | 16121 TGG | 1.049738325 |
| TTCTTTATGATAATATGGAT | + | 16126 AGG | 2.167490037 |
| AAGAGGTATTTAAATATGTT | + | 16156 TGG | 1.840169401 |
| TTATAGGCTCTCCGTTTGTA | - | 16165 GGG | 0.302629725 |
| TTTATAGGCTCTCCGTTTGT | - | 16166 AGG | 0.150518468 |
| TATGTTTGGCACCTACAAA  | + | 16170 CGG | 0.095112199 |
| TATGTTTGGCACCTACAAA  | + | 16170 CGG | 0.732414796 |
| ACGTCATCAAATCTTTTAT  | - | 16181 AGG | 1.655096376 |
| ACGTCATCAAATCTTTTAT  | - | 16181 AGG | 1.881992822 |
| AAAAGAATTTGATGACGTGT | + | 16202 TGG | 1.113965606 |
| AAAAGAATTTGATGACGTGT | + | 16202 TGG | 0.217435643 |
| AGGTTTAGTATGTGTGTATA | - | 16224 TGG | 1.209732848 |
| ATACTAAACCTGAACGATTA | + | 16252 AGG | 0.038909536 |
| ATTAGAGCCTCAATATGCTT | - | 16315 AGG | 1.665472252 |
| ATTAGAGCCTCAATATGCTT | - | 16315 AGG | 0.609368041 |
| TAAAGACGATAGAGAGAGAA | + | 16363 TGG | 0.358210916 |
| TAAAGACGATAGAGAGAGAA | + | 16363 TGG | 0.328468874 |
| ATTGGTCGACGTTTGAATAT | - | 16411 TGG | 1.627678321 |
| ATTGGTCGACGTTTGAATAT | - | 16411 TGG | 0.908969995 |
| AAATCTTCTTTTTCTTCAAT | - | 16429 TGG | 0.169904974 |
| AAAGAAGATTTTAAAAGTGG | + | 16457 TGG | 1.334597086 |
| TTGAAACTGGTGAAATGTA  | + | 16467 AGG | 1.111914818 |
| ACACGTGTTGGTTATTTACA | + | 16550 TGG | 0.866621485 |
| TCATCTAAATCATAAGTAAC | - | 16561 AGG | 1.199487077 |

|                       |   |       |     |             |
|-----------------------|---|-------|-----|-------------|
| TCATCTAAATCATAAGTAAC  | - | 16561 | AGG | 0.606988762 |
| ATCATCAACACTATTTCTAA  | - | 16631 | TGG | 1.752854237 |
| ATCATCAACACTATTTCTAA  | - | 16631 | TGG | 0.699116502 |
| TAGAAATAGTGTTGATGATG  | + | 16651 | AGG | 0.058364304 |
| TAGAAATAGTGTTGATGATG  | + | 16651 | AGG | 1.022259629 |
| GGATTCTGAAATAGGTAAAA  | + | 16672 | TGG | 0.047775    |
| GGATTCTGAAATAGGTAAAA  | + | 16672 | TGG | 0.040855013 |
| CAATTTGCGGATATGGTGCT  | + | 16698 | AGG | 1.776868813 |
| TTGATACGAATGGTGATGTT  | + | 16731 | AGG | 1.897597659 |
| GCCAACAAAAATAACATTAT  | - | 16754 | AGG | 2.039157086 |
| GCCAACAAAAATAACATTAT  | - | 16754 | AGG | 1.488289754 |
| AAGTAGCGCAATGAGTATGT  | - | 16792 | AGG | 0.034987204 |
| AAGTAGCGCAATGAGTATGT  | - | 16792 | AGG | 1.149452544 |
| TATGAAAAAGATGATGATAA  | + | 16832 | TGG | 0.92557736  |
| TATGAAAAAGATGATGATAA  | + | 16832 | TGG | 0.049190511 |
| TATTATGTATTTGAGGAGA   | + | 16895 | AGG | 1.809293426 |
| TTGTTAGGTACACCAAACAA  | - | 16954 | TGG | 0.330175206 |
| TTGTTAGGTACACCAAACAA  | - | 16954 | TGG | 0.868979638 |
| TTTGATTACAATCCATTGTT  | + | 16958 | TGG | 2.35993724  |
| CCTATCATCTCTTTGTTGTT  | - | 16969 | AGG | 1.14394036  |
| CCTATCATCTCTTTGTTGTT  | - | 16969 | AGG | 0.698210008 |
| CCTAACAACAAAGAGATGAT  | + | 16985 | AGG | 1.54576975  |
| TACCCATACCGCGTAACACA  | - | 17082 | AGG | 1.134323619 |
| TACCCATACCGCGTAACACA  | - | 17082 | AGG | 0.530142429 |
| ACTTTCATTACTTAAATCA   | + | 17090 | CGG | 0.722224472 |
| ATACCTTGTTACGCGGTA    | + | 17095 | TGG | 0.31426933  |
| TACCTTGTTACGCGGTAT    | + | 17096 | GGG | 0.846282409 |
| ATTCAAGAAACACAAAAGAG  | + | 17135 | TGG | 0.705116714 |
| TGAGTTGTTGACAAAAGATA  | + | 17164 | TGG | 0.12052466  |
| TCTTTTCGATTCGATCTAAA  | - | 17217 | TGG | 1.511654477 |
| TCTTTTCGATTCGATCTAAA  | - | 17217 | TGG | 1.360828022 |
| TTAATTCTGACGAGTTTAA   | + | 17285 | CGG | 2.564840073 |
| GTAAGATGACAGCTATGTTG  | + | 17376 | AGG | 1.220021341 |
| GTAAGATGACAGCTATGTTG  | + | 17376 | AGG | 0.264028995 |
| TTATCTGCATTAAAGCGTAA  | + | 17417 | AGG | 1.793299362 |
| TTATCTGCATTAAAGCGTAA  | + | 17417 | AGG | 1.077275355 |
| TATCTGCATTAAAGCGTAAA  | + | 17418 | GGG | 1.355643608 |
| AAAGCGTAAAGGGTACAAC   | + | 17428 | TGG | 0.023281936 |
| TACGAGTGAACCTTAAATATC | - | 17454 | AGG | 1.86570196  |
| GATTCTTCTAACTTATTAAC  | - | 17482 | TGG | 1.745370617 |
| GATTCTTCTAACTTATTAAC  | - | 17482 | TGG | 0.200533763 |
| ACAAGTGCTAATTAACCTGA  | + | 17521 | AGG | 1.839359886 |
| GACAAGTTTCAGAACGAACA  | + | 17544 | AGG | 0.972738401 |
| GTTTCAGAACGAACAAGGTT  | + | 17549 | AGG | 0.045787009 |
| AAATTACCTGACATAGATGA  | + | 17645 | AGG | 1.630740962 |

|                      |   |       |     |             |
|----------------------|---|-------|-----|-------------|
| AAATTACCTGACATAGATGA | + | 17645 | AGG | 1.76562828  |
| CTCATCAATATCATTCTGAT | - | 17679 | TGG | 1.564457006 |
| CTCATCAATATCATTCTGAT | - | 17679 | TGG | 0.143350922 |
| TGATATTGATGAGTATATCG | + | 17705 | AGG | 0.77111626  |
| GATATTGATGAGTATATCGA | + | 17706 | GGG | 0.08300701  |
| TTAGCAAATAGTTGTTCTAT | - | 17735 | TGG | 2.117522582 |
| ATGATGATGTGTATGTTACA | + | 17827 | TGG | 0.598811165 |
| ATGATGATGTGTATGTTACA | + | 17827 | TGG | 1.313434095 |
| CTGAATTCAATAAATACAAC | + | 17851 | AGG | 0.045494227 |
| TAAATACAACAGGCTCAATA | + | 17861 | AGG | 2.220417337 |
| TAAATACAACAGGCTCAATA | + | 17861 | AGG | 1.27060988  |
| AATAAGGAGTAACTCGTAT  | + | 17877 | AGG | 0.935307293 |
| AATAAGGAGTAACTCGTAT  | + | 17877 | AGG | 0.547165351 |
| CATATAAATAAAGGCTCATA | - | 17962 | AGG | 1.594930704 |
| GAGCCTTTATTTATATGAAA | + | 17984 | TGG | 0.357967732 |
| GTTTGATGTTCCGAGTAAAG | + | 18026 | AGG | 1.901802833 |
| GTTTGATGTTCCGAGTAAAG | + | 18026 | AGG | 1.046532349 |
| ATTAACGAATGAACTCAAT  | - | 18056 | AGG | 0.247745887 |
| ATTAACGAATGAACTCAAT  | - | 18056 | AGG | 1.412715462 |
| TCACGATGTTTTGTAGTGT  | - | 18080 | TGG | 1.136387332 |
| ACAAGGTATTATGAGTGGAG | + | 18152 | AGG | 0.657366372 |
| AAAGCAATACGTGATGATGT | + | 18192 | CGG | 2.17755669  |
| AAAGCAATACGTGATGATGT | + | 18192 | CGG | 0.832907256 |
| AGCTGGACTTGATAGCGCAA | + | 18275 | TGG | 0.079375454 |
| GTTTGAAGATGAAGAAACGT | + | 18313 | TGG | 2.164224316 |
| ATCAGAATTTTAAATCAAGT | + | 18403 | GGG | 0.261973109 |
| TTTAAATCAAGTGGGTGTGT | + | 18411 | TGG | 1.498017138 |
| TTAAATCAAGTGGGTGTGTT | + | 18412 | GGG | 1.928559612 |
| ATCAAGTGGGTGTGTTGGGC | + | 18416 | AGG | 0.356329435 |
| TTTACACCAATAAATAGCTT | - | 18425 | GGG | 1.310637004 |
| GTTTACACCAATAAATAGCT | - | 18426 | TGG | 1.025796859 |
| TTACGTGCTCTCATTACAGT | - | 18512 | TGG | 1.527829768 |
| ATGAGAGCACGTAAAGACGA | + | 18537 | TGG | 0.064507915 |
| CATTCATGACTTATCGTGAG | + | 18577 | TGG | 1.671613529 |
| GAGAAATATAAGCGAAAAGG | + | 18600 | TGG | 0.010382868 |
| GAGAAATATAAGCGAAAAGG | + | 18600 | TGG | 0.162843614 |
| ATAAAAGTAAATGTTGATAC | + | 18643 | TGG | 0.091533089 |
| CTCTATTATCTCTTCGTACA | - | 18682 | AGG | 2.103894199 |
| CTCTATTATCTCTTCGTACA | - | 18682 | AGG | 2.688853727 |
| AAATGAAGCTGATTTAGATA | + | 18759 | TGG | 1.947776002 |
| AAATGAAGCTGATTTAGATA | + | 18759 | TGG | 0.022430203 |
| TATGCACTTTTCGGACTGTT | + | 18886 | AGG | 0.018332378 |
| AGGGTACGCGAAGGGCAAAA | + | 18906 | AGG | 1.355348839 |
| TTATCTAAAGGGACTTAAGA | + | 19002 | CGG | 2.462159246 |
| TTATCTAAAGGGACTTAAGA | + | 19002 | CGG | 1.152833968 |



|                      |   |       |     |             |
|----------------------|---|-------|-----|-------------|
| GTGTCTGTTGATGACGTTAA | + | 19024 | AGG | 1.436659792 |
| GAATGATAACGATCTAATTC | - | 19068 | AGG | 0.925099161 |
| ATGGAAAGAGAAAAATCTTG | + | 19122 | AGG | 0.008646564 |
| ATCTAATCGAACAGAAGTA  | + | 19145 | CGG | 1.408926165 |
| TTTTGTTCTTCTGATTGCTC | - | 19161 | AGG | 1.525253813 |
| GTTAGAAAAACGCGACGCAG | + | 19224 | AGG | 0.010019623 |
| GTTAGAAAAACGCGACGCAG | + | 19224 | AGG | 0.821269136 |
| AAGTTAAGAAGTAACGCGCT | + | 19258 | AGG | 0.034528992 |
| GCCTAAAAATCTATCAACTA | - | 19294 | AGG | 0.854817579 |
| GCCTAAAAATCTATCAACTA | - | 19294 | AGG | 0.066924402 |
| TCCTTAGTTGATAGATTTTT | + | 19309 | AGG | 0.031056235 |
| GAGTCTAAATTTAAATCGAG | + | 19408 | TGG | 0.010427756 |
| TCCGATAAAATAACATTGCC | - | 19546 | TGG | 1.136714303 |
| ATTAAGTACCTTGTTCTGC  | - | 19588 | TGG | 2.100455463 |
| ATTAAGTACCTTGTTCTGC  | - | 19588 | TGG | 0.784176803 |
| ACTTACTTAGCAAAAGGTGT | + | 19706 | AGG | 1.828748194 |
| AAAAGGTGTAGGCGCCTACT | + | 19717 | GGG | 0.914374097 |
| ATTTCTGCTTGTGCATATTC | - | 19753 | AGG | 1.425756571 |
| TGAATATGCACAAGCAGAAA | + | 19771 | TGG | 1.592896545 |
| TGCAAAAGATTTCTTTAATG | + | 19849 | AGG | 1.711118207 |
| TGCAAAAGATTTCTTTAATG | + | 19849 | AGG | 0.008891093 |
| TTTGACCAAGCTGTTATCTT | + | 19907 | TGG | 0.479201654 |
| AGTGGTAAACCGCTTGTTGA | + | 19958 | AGG | 2.015884534 |
| TAATTTATACGTAGACCTTT | + | 20017 | CGG | 0.054534094 |
| TAATTTATACGTAGACCTTT | + | 20017 | CGG | 0.094704342 |
| GACCATTATTTGATGCTAAC | + | 20142 | GGG | 0.141579589 |
| GGATTACCACTATCTTATAC | + | 20177 | TGG | 1.486641945 |
| AAGAAATCGTTAGCACTAAT | + | 20219 | GGG | 0.068656165 |
| GTTAGCACTAATGGGTGATT | + | 20227 | GGG | 0.534583191 |
| GATTGGGATTACGCACGTTA | + | 20243 | CGG | 0.061828852 |
| GATTGGGATTACGCACGTTA | + | 20243 | CGG | 0.479884278 |
| GCACGTTACGGTATCTTACA | + | 20255 | AGG | 1.312773912 |
| TGCTTGTAACGTCGTTAACG | - | 20288 | TGG | 1.825908082 |
| TGCTTGTAACGTCGTTAACG | - | 20288 | TGG | 0.218634536 |
| GTTCAAATAATGATACTGGT | - | 20325 | TGG | 0.979281958 |
| TCACGTTCAAATAATGATAC | - | 20329 | TGG | 0.024341511 |
| TTAAGCGTTGCGAACGCTTC | - | 20401 | TGG | 1.464110256 |
| AACGCTTAAACCAACTGAAT | + | 20431 | AGG | 0.031119878 |
| AACGCTTAAACCAACTGAAT | + | 20431 | AGG | 2.146733023 |
| TTTACCTTAATATCTTCTGC | - | 20457 | AGG | 1.780433373 |
| TTTACCTTAATATCTTCTGC | - | 20457 | AGG | 1.911907791 |
| GACTCTTATTACAGTCTTGT | + | 20536 | CGG | 0.545117796 |
| GACTCTTATTACAGTCTTGT | + | 20536 | CGG | 1.561608096 |
| CGCTCTTATCAGACGTAGTA | - | 20564 | CGG | 1.739306793 |
| TTTACTCAAGAAAAATGGAG | + | 20639 | TGG | 0.009868361 |

|                      |   |       |     |             |
|----------------------|---|-------|-----|-------------|
| TTTACTCAAGAAAAATGGAG | + | 20639 | TGG | 0.44886943  |
| ACGGAATACTAGAAGATGTT | + | 20704 | AGG | 1.206195617 |
| ACGGAATACTAGAAGATGTT | + | 20704 | AGG | 1.810374246 |
| ACATACTTTTTGATTGAGTA | - | 20756 | AGG | 2.241323447 |
| ATTTAAAGTCAAGAAGTATG | + | 20839 | GGG | 1.889891751 |
| AATACTCCACTAATGTAATC | - | 20876 | AGG | 1.731474354 |
| AATACTCCACTAATGTAATC | - | 20876 | AGG | 0.025939691 |
| TTCATCCGTTTAAATCAATA | + | 20938 | AGG | 1.076066663 |
| TTCATCCGTTTAAATCAATA | + | 20938 | AGG | 1.117877147 |
| TCCCTCACACTATTTCTAT  | + | 20996 | TGG | 1.864961029 |
| TCCCTCACACTATTTCTAT  | + | 20996 | TGG | 0.946944439 |
| ATTGGAAGTATCAAAAAAGT | + | 21014 | AGG | 2.381356247 |
| ACAAGCGTTCCTGTATAAT  | - | 21028 | TGG | 0.067541081 |
| TAAAACAATTAAGGATTTA  | + | 21073 | TGG | 0.422446391 |
| GTAAGTCGTAAGGTACATAT | - | 21141 | AGG | 1.684163895 |
| TTAGCTATTGGTAAGTCGTA | - | 21151 | AGG | 1.563635762 |
| AATAAATTGTTTTAGCTAT  | - | 21163 | TGG | 2.373481699 |
| AACAATTTATTTGAGTATGA | + | 21191 | GGG | 0.180847139 |
| TGTAGGCGATTCTGTAGATC | + | 21229 | AGG | 0.027138584 |
| TAAACTACTACGACTTAAGC | + | 21268 | AGG | 0.088430764 |
| CGTACTTAACTTTTGCCATA | - | 21277 | TGG | 2.424897871 |
| CGTACTTAACTTTTGCCATA | - | 21277 | TGG | 0.094603578 |
| TAAGTACGGTGCTGATAGCA | + | 21308 | TGG | 0.38909536  |
| CGATAAGAAAATAGAAGAGT | + | 21350 | GGG | 0.230677964 |
| TCTAAAAAACCTAAGTCAAC | - | 21416 | AGG | 1.897795176 |
| TCTAAAAAACCTAAGTCAAC | - | 21416 | AGG | 1.86259949  |
| ACTTTAAATATTTGATGGT  | + | 21466 | GGG | 2.093435433 |
| TTATCCAGTGTTATAAGTGT | + | 21489 | CGG | 1.046461732 |
| TATGCAATATACGTTGAATA | + | 21519 | CGG | 1.410470682 |
| TATGCAATATACGTTGAATA | + | 21519 | CGG | 0.771987751 |
| GGTATATATGCTACTGGTCC | + | 21546 | TGG | 1.620843509 |
| GGTATATATGCTACTGGTCC | + | 21546 | TGG | 0.547327474 |
| TGGAGTTTTAAAGGTGATGA | + | 21594 | CGG | 0.145026453 |
| GGCGAATGGTACACAACATA | + | 21615 | TGG | 1.684900818 |
| GGCGAATGGTACACAACATA | + | 21615 | TGG | 0.667947035 |
| GTCAAGCGCCACAGCCATTT | + | 21637 | TGG | 1.853761467 |
| TGCGTCCTGCGTCAATTGCA | - | 21646 | GGG | 1.581470651 |
| TTGCGTCCTGCGTCAATTGC | - | 21647 | AGG | 0.956231325 |
| TGGAACCCTGCAATTGACGC | + | 21657 | AGG | 1.559374483 |
| TCGAGCAGTATTTTTCATAG | + | 21691 | AGG | 1.471853829 |
| CATAGAGGTGGTTAAATATG | + | 21706 | TGG | 0.070889977 |
| TATATTTGATTTGTAAGTTC | - | 21725 | AGG | 0.827875205 |
| TATATTTGATTTGTAAGTTC | - | 21725 | AGG | 0.022267506 |
| TCAACTAGTTTGTTAATGTT | - | 21767 | AGG | 0.056075508 |
| TAACAACTAGTTGATGATA  | + | 21791 | GGG | 0.009646992 |

|                       |   |       |     |             |
|-----------------------|---|-------|-----|-------------|
| ATTCACCCACAACAATATAT  | - | 21829 | GGG | 1.457024423 |
| GATTCACCCACAACAATATA  | - | 21830 | TGG | 0.874504107 |
| TGTTTACCCATATATTGTTG  | + | 21839 | TGG | 0.153590274 |
| GTTTACCCATATATTGTTGT  | + | 21840 | GGG | 0.391302994 |
| GCAACAATGAGAGAAACAGT  | + | 21894 | CGG | 1.511485823 |
| GCAACAATGAGAGAAACAGT  | + | 21894 | CGG | 1.481945807 |
| ACAGTTCGCTACACAATACG  | + | 21938 | AGG | 1.483316023 |
| ACAGTTCGCTACACAATACG  | + | 21938 | AGG | 0.359913208 |
| TCGTAATTATCTATTTCTAT  | - | 21986 | AGG | 0.123495484 |
| ATACTGCTTGACTATCGATA  | - | 22021 | CGG | 0.128172589 |
| CAGTATCCCTGATATAGAC   | + | 22054 | AGG | 0.241794974 |
| ATAGACAGGTTTACTAAGCA  | + | 22068 | TGG | 0.541758069 |
| ATAGACAGGTTTACTAAGCA  | + | 22068 | TGG | 1.824424912 |
| TTACTAAGCATGGCACGATA  | + | 22078 | CGG | 0.949746402 |
| AAACGAAGGAGTGTATTTAAA | + | 22130 | TGG | 2.137991895 |
| AAACGAAGGAGTGTATTTAAA | + | 22130 | TGG | 0.267308513 |
| GGATCTAAGTCAGTTTCAGC  | - | 22166 | TGG | 1.943819771 |
| GGATCTAAGTCAGTTTCAGC  | - | 22166 | TGG | 0.453944587 |
| AATGATTCTGACATTGCATT  | - | 22286 | GGG | 1.981231511 |
| AAATGATTCTGACATTGCAT  | - | 22287 | TGG | 0.489416333 |
| AAATGATTCTGACATTGCAT  | - | 22287 | TGG | 3.268401027 |
| GAATCATTTAAATTAACAAT  | + | 22317 | TGG | 0.017192586 |
| GCTTCAATTCCTTTATCTCC  | - | 22331 | AGG | 0.973931945 |
| GTGAAACACGCTGTACAAAC  | + | 22371 | AGG | 1.930772617 |
| GTGAAACACGCTGTACAAAC  | + | 22371 | AGG | 1.58799544  |
| GGTAAACATCACGGAATGTT  | + | 22440 | TGG | 0.056493653 |
| GGTAAACATCACGGAATGTT  | + | 22440 | TGG | 1.307072192 |
| AACTATCATTTAAAAGTTAAA | + | 22519 | TGG | 2.232178647 |
| AACTATCATTTAAAAGTTAAA | + | 22519 | TGG | 0.072260567 |
| GCAGCTTCAAACCACTCTTT  | - | 22556 | CGG | 1.340610378 |
| AAGATAACTTGCCGAAAGAG  | + | 22561 | TGG | 2.044107952 |
| TTAATTTTTAATGTTGTAAT  | - | 22772 | TGG | 1.945476802 |
| TTAATTTTTAATGTTGTAAT  | - | 22772 | TGG | 1.954966933 |
| ACAACATTTAAAATTAATGA  | + | 22794 | CGG | 0.16094399  |
| TTAAATATAACATTGAATCC  | - | 22901 | TGG | 0.611341354 |
| GGATTCAATGTTATATTTAA  | + | 22920 | CGG | 1.900082343 |
| TTTTCTAATTGTTCTCGAGT  | - | 22997 | TGG | 0.416131094 |
| TTTTCTAATTGTTCTCGAGT  | - | 22997 | TGG | 0.343261246 |
| TGATTTTCATCACTGAAAACG | + | 23045 | AGG | 1.998282601 |
| TCCAAAGCCCCTTGTAAATA  | - | 23060 | CGG | 1.245105153 |
| GATACTTTGCCGTTATTACA  | + | 23067 | AGG | 1.853007196 |
| GCCGTTATTACAAGGGGCTT  | + | 23075 | TGG | 1.419549573 |
| AGAGGGGAGAGTCGCTCGTAC | + | 23125 | TGG | 0.141831535 |
| ATTGAACAAAGCACCGAATA  | + | 23153 | TGG | 1.831990655 |
| ACCGAATATGGCCAAAAGCG  | + | 23165 | AGG | 1.687258972 |

|                       |   |       |     |             |
|-----------------------|---|-------|-----|-------------|
| GACAAAGAAATGACGAAAGC  | + | 23187 | AGG | 1.603514127 |
| GAGAATTACAAGGAAATCAT  | + | 23226 | GGG | 0.472102371 |
| CAACTGACAGCTAGATATTT  | + | 23282 | AGG | 2.132432378 |
| TAGCACTAACACCTGCTGAA  | + | 23328 | TGG | 1.834683547 |
| TTAATAATTGTCTTTGATCT  | - | 23367 | AGG | 2.272670628 |
| TTAATAATTGTCTTTGATCT  | - | 23367 | AGG | 0.53276134  |
| ATTGAACAAGCGCAAGCTAA  | + | 23405 | CGG | 0.050820619 |
| ATTGAACAAGCGCAAGCTAA  | + | 23405 | CGG | 0.173324297 |
| CGTTACGAAATAAGAGAACC  | + | 23483 | TGG | 1.951640689 |
| TGTACACGAGCATAGCTACC  | - | 23485 | AGG | 1.761499563 |
| GCCTTTGGATACTCATTTTA  | + | 23608 | TGG | 0.525868275 |
| GCCTTTGGATACTCATTTTA  | + | 23608 | TGG | 0.350185824 |
| GAGCTTTCCTTACGTTGCTT  | - | 23643 | TGG | 0.75225103  |
| GAGATTTCCAAAGCAACGTA  | + | 23652 | AGG | 0.021193279 |
| ACATCTGTTTCAATTTGCTT  | - | 23689 | TGG | 0.828773118 |
| TTTACAACGCGCTAAATCAA  | + | 23758 | TGG | 0.023556043 |
| CTAAATCAATGGCTCAACGA  | + | 23769 | TGG | 1.398149328 |
| CTAAATCAATGGCTCAACGA  | + | 23769 | TGG | 0.966253478 |
| GAGAAAACATGTTGTTAAGT  | + | 23959 | TGG | 2.344811514 |
| GAGAAAACATGTTGTTAAGT  | + | 23959 | TGG | 0.035159219 |
| TGCAAACCCCGCTAAAATGG  | + | 23989 | CGG | 0.03214266  |
| AAGATTTAATAGATCTTAGC  | + | 24027 | AGG | 1.294895758 |
| AAGATTTAATAGATCTTAGC  | + | 24027 | AGG | 0.014337826 |
| ATTTCTAATTTCCATCTGC   | - | 24053 | TGG | 1.38992436  |
| ATTTCTAATTTCCATCTGC   | - | 24053 | TGG | 0.117372332 |
| TAAATGGAACAAGTGATATT  | + | 24174 | TGG | 1.255716845 |
| AACAACCTCATTGAAAGATTA | + | 24206 | CGG | 1.292352447 |
| ATCTTCGCGCAACAGGTCAA  | + | 24275 | AGG | 0.020776937 |
| GGTACTAATCCGGCAATCAC  | - | 24313 | TGG | 1.522335598 |
| GGTACTAATCCGGCAATCAC  | - | 24313 | TGG | 0.165788458 |
| GCATTGATACCAGTGATTGC  | + | 24320 | CGG | 0.974548147 |
| TTAAGTACTGCCATTATTGC  | - | 24334 | AGG | 0.091826505 |
| CGGATTAGTACCTGCAATAA  | + | 24340 | TGG | 0.272366752 |
| CTTAATGCGGTTGGTGTATT  | + | 24368 | AGG | 0.043897938 |
| GCATTCTCTGTCGAGGTCT   | + | 24416 | TGG | 0.93938737  |
| AATGGTTGAAGATGGAACAT  | + | 24478 | TGG | 1.822263271 |
| AATGGTTGAAGATGGAACAT  | + | 24478 | TGG | 0.84952487  |
| GCGATCAGTTAAAACTACA   | + | 24537 | TGG | 0.246799758 |
| GCGATCAGTTAAAACTACA   | + | 24537 | TGG | 1.71360773  |
| ATCTTTAATGCGATGTCAGC  | + | 24590 | AGG | 1.812312269 |
| GCGATGTCAGCAGGTATCAG  | + | 24599 | AGG | 1.702499167 |
| ATAGATACTTCAGATAAGAA  | - | 24634 | TGG | 2.235136681 |
| ATAGATACTTCAGATAAGAA  | - | 24634 | TGG | 0.859547023 |
| TCTTATCTGAAGTATCTATG  | + | 24655 | TGG | 1.685418168 |
| TCTTATCTGAAGTATCTATG  | + | 24655 | TGG | 2.212285049 |

|                       |   |       |     |             |
|-----------------------|---|-------|-----|-------------|
| AGCAAACGCACGCAAGTTTG  | + | 24682 | AGG | 0.004286644 |
| TTGAACGCTGCAGGAAGATT  | + | 24785 | TGG | 0.062741627 |
| TGAGACACAAATTTGAACAA  | - | 24826 | CGG | 1.724526222 |
| GACCAATCTTAGGTAAGTTA  | - | 24938 | TGG | 1.883221544 |
| ACCACTAECTTACCTAAGAT  | + | 24953 | TGG | 0.07349579  |
| CCTAAGATTGGTCAGATATT  | + | 24965 | TGG | 0.116728608 |
| ATATTTGGCAATGTGTTCCG  | + | 24980 | TGG | 1.751685696 |
| ATATTTGGCAATGTGTTCCG  | + | 24980 | TGG | 2.184121956 |
| GGCAATGTGTTCCGCTGGTAT | + | 24986 | TGG | 1.305340108 |
| ACAGTTCTAACATTTTTGAC  | + | 25035 | TGG | 1.685527987 |
| ACAGTTCTAACATTTTTGAC  | + | 25035 | TGG | 0.359341009 |
| TAACTTCTCAATTTAGAGCA  | + | 25068 | TGG | 0.276257706 |
| AGAGCATGGTCAGAACAAGT  | + | 25082 | AGG | 0.126401035 |
| AGAGCATGGTCAGAACAAGT  | + | 25082 | AGG | 1.835665445 |
| CCGATTAECTGCATAATAGT  | - | 25138 | AGG | 1.663055906 |
| CCGATTAECTGCATAATAGT  | - | 25138 | AGG | 0.564188273 |
| CCTACTATTATGCAGTTAAT  | + | 25154 | CGG | 1.935167438 |
| TAATATCGTAAAAGCGTTAG  | + | 25177 | TGG | 1.52719929  |
| GTAAAAGCGTTAGTGGCATT  | + | 25184 | TGG | 1.80060087  |
| GTAAAAGCGTTAGTGGCATT  | + | 25184 | TGG | 2.054099257 |
| TGGGTGTGCTTCGAATAGTT  | - | 25256 | TGG | 1.570156867 |
| CCGATAATTTGAGCGACTGC  | - | 25276 | TGG | 1.185443865 |
| ATCGGTGTTATCGGTATTTT  | + | 25310 | AGG | 0.105284627 |
| ACACTGCTAACAGCTGCAAT  | - | 25342 | CGG | 0.534420134 |
| CTGGATTAACTAGAATAAC   | + | 25430 | TGG | 0.879355515 |
| TGGATTTAACTAGAATAACT  | + | 25431 | GGG | 1.897425869 |
| ACTGCAACTACTGCTAATAT  | - | 25492 | TGG | 1.568054302 |
| ACTGCAACTACTGCTAATAT  | - | 25492 | TGG | 1.318060533 |
| GCAAGTATTGGTGTATTCAT  | + | 25526 | TGG | 1.004781548 |
| GAAAAACAATAACAGAAGCT  | + | 25587 | TGG | 1.780901839 |
| ACAATAACAGAAGCTTGGAA  | + | 25592 | CGG | 0.01111701  |
| ACAATAACAGAAGCTTGGAA  | + | 25592 | CGG | 0.104569378 |
| CGATTCAAGGTGTAGTAGAT  | + | 25638 | TGG | 1.295255222 |
| TGTCCTAATACTTGTAAATAT | - | 25693 | AGG | 0.50906643  |
| TGAATATCATAACAAGTTTG  | + | 25785 | TGG | 0.609582731 |
| ATATCACTGTTCCCTATGGCT | - | 25812 | TGG | 1.866198622 |
| ATATCACTGTTCCCTATGGCT | - | 25812 | TGG | 0.583643041 |
| ACAATTGCGTTCCAAGCCAT  | - | 25817 | AGG | 0.189143578 |
| GCTTTAATTGAGTTGCTTAC  | + | 25886 | TGG | 2.057460345 |
| TTGCTTACTGGCGACTTCTC  | + | 25898 | AGG | 2.137478999 |
| CCAAATCGTATCAAGTACAT  | - | 25934 | TGG | 1.270016747 |
| CCAAATCGTATCAAGTACAT  | - | 25934 | TGG | 0.366398131 |
| GGCAATACATGCAATCAGTT  | + | 25971 | TGG | 0.318085457 |
| TCAATTATCGGCTTTTTAAC  | + | 25997 | TGG | 1.861014638 |
| AATCGAACGCTTTCAATGTT  | + | 26027 | TGG | 0.665353066 |

|                       |   |       |     |             |
|-----------------------|---|-------|-----|-------------|
| TTTCAATGTTTGGTACAAGT  | + | 26037 | TGG | 0.931183017 |
| TTTCAATGTTTGGTACAAGT  | + | 26037 | TGG | 2.045012825 |
| GTACAAGTTGGTCACAGATA  | + | 26049 | TGG | 0.087969386 |
| GTACAAGTTGGTCACAGATA  | + | 26049 | TGG | 0.080107868 |
| TTTGGAGCACTGTTACAAGT  | + | 26100 | TGG | 1.568540672 |
| CTGAATGGGTTTCTAACATT  | + | 26193 | TGG | 1.670395431 |
| AAAAGAGTTGTCTCAAATGT  | + | 26258 | AGG | 0.036130283 |
| GTTGTCTCAAATGTAGGTGA  | + | 26264 | CGG | 0.061901535 |
| GACGGTATGAGTGATGCACT  | + | 26282 | TGG | 0.355174226 |
| GACGGTATGAGTGATGCACT  | + | 26282 | TGG | 0.795700012 |
| TTCAGTGATTTCTTAAATGC  | + | 26321 | CGG | 1.382172837 |
| TTCAGTGATTTCTTAAATGC  | + | 26321 | CGG | 0.081914813 |
| TTTGCCGATTAATTCCGCTC  | - | 26324 | CGG | 0.652683742 |
| TTTGCCGATTAATTCCGCTC  | - | 26324 | CGG | 1.994762214 |
| AATGCCGGAGCGGAATTAAT  | + | 26336 | CGG | 1.919942419 |
| ATTAATCGGCAAAGTAGCTG  | + | 26350 | AGG | 0.017022922 |
| GACTACTTTGTGCGCAGCAT  | - | 26363 | TGG | 2.014216982 |
| CACAAAGTAGTCAGCGCGGT  | + | 26390 | AGG | 0.859874979 |
| GCGATGCGATTTTCATCAGCT | + | 26412 | TGG | 0.019454768 |
| AAAGTAATTGCTACAGACTT  | + | 26510 | TGG | 1.071780856 |
| AGAGGATAGCTCTTATTA    | - | 26522 | AGG | 1.369615669 |
| CTGTCTATAGAAGTACTTAC  | - | 26569 | AGG | 1.730896489 |
| CTAATCGTTACATTCACAAT  | - | 26638 | AGG | 1.852432259 |
| TCCAAGTGATTATAAGTGAA  | - | 26814 | AGG | 0.014722527 |
| TCCTTTCACCTATAATCACT  | + | 26829 | TGG | 2.101357122 |
| TCCTTTCACCTATAATCACT  | + | 26829 | TGG | 0.334960354 |
| GTAGTTGAATATAACGTTAC  | + | 26854 | AGG | 0.038440746 |
| TCTGATATAGAGGGTATTGA  | + | 26899 | TGG | 0.021184081 |
| TCTGATATAGAGGGTATTGA  | + | 26899 | TGG | 0.046360298 |
| AAAAAGTAGAGCTTAAGATA  | + | 26954 | AGG | 0.102967919 |
| TCATACTAATTGAATTGTC   | - | 27063 | TGG | 0.010024728 |
| TCATACTAATTGAATTGTC   | - | 27063 | TGG | 0.022447809 |
| TCAAATGCTTGTTTGTCTTT  | - | 27102 | TGG | 2.132242575 |
| TTTGAGCTTGATTATGTTGA  | + | 27136 | TGG | 2.174113368 |
| GATGGACGACAACCTTTTTGT | + | 27154 | AGG | 0.604594329 |
| GATGGACGACAACCTTTTTGT | + | 27154 | AGG | 0.07705614  |
| TTTGACACAACACAACATC   | + | 27196 | AGG | 1.349784357 |
| TTGACACAACACAACATCA   | + | 27197 | GCG | 0.568379055 |
| TAACGACCCTGAAAAATGGT  | + | 27297 | CGG | 0.199735618 |
| TCGTTTGTAGGCAATCTATC  | - | 27306 | AGG | 0.080598325 |
| ACATTTTACAACACTAACTC  | + | 27367 | AGG | 1.230762838 |
| AGATGTTAAAGCTAATGATA  | + | 27465 | AGG | 0.150332298 |
| GTTAAAGCTAATGATAAGGA  | + | 27469 | TGG | 0.02544085  |
| AGGAAATATCTCAGTTATTA  | + | 27513 | AGG | 2.069776996 |
| AGGAAATATCTCAGTTATTA  | + | 27513 | AGG | 1.656087128 |

|                       |   |       |     |             |
|-----------------------|---|-------|-----|-------------|
| GTCGAAGATTATTTTATCTC  | - | 27535 | CGG | 0.196273796 |
| GACGGTAAACATACCTATAG  | + | 27571 | AGG | 1.650153424 |
| TAATAAAACTTTAGAACAAAC | + | 27615 | CGG | 2.262240333 |
| TAATAAAACTTTAGAACAAAC | + | 27615 | CGG | 0.047450654 |
| TGTAGACTTTTTAATAAAAAT | - | 27718 | TGG | 2.012684183 |
| CGCTATTAATGTTAGTACAA  | + | 27769 | AGG | 1.496480079 |
| CGCTATTAATGTTAGTACAA  | + | 27769 | AGG | 0.178983866 |
| GCTAAATGAAGATAGTTCTT  | + | 27802 | TGG | 3.286359275 |
| GCTAAATGAAGATAGTTCTT  | + | 27802 | TGG | 1.117764854 |
| TGGACGATCACTCATGTTGA  | + | 27884 | AGG | 1.666035589 |
| ATACTTGATAAGTCTACTAT  | + | 27938 | TGG | 2.673085126 |
| ATACTTGATAAGTCTACTAT  | + | 27938 | TGG | 0.053668326 |
| GGTAAATCCTAGAATTGTTA  | - | 27993 | AGG | 2.005826287 |
| TAAAACCTTCGTTATACTCT  | - | 28014 | TGG | 1.782130165 |
| TAAAACCTTCGTTATACTCT  | - | 28014 | TGG | 1.199650088 |
| GAGTATAACGAAAGTTTTAC  | + | 28034 | AGG | 0.594856163 |
| TTCTTCAATACTGTCTTTAA  | + | 28064 | AGG | 1.412416158 |
| AATACTGTCTTTAAAGGAAC  | + | 28070 | GGG | 2.196892266 |
| AAATTCGAGGGATTAGGCAA  | + | 28130 | AGG | 1.331261983 |
| ACCAGCTTAAATGTAATAAT  | - | 28247 | TGG | 1.754171583 |
| ATCACCATAACCTTTAATAA  | - | 28319 | AGG | 1.733381684 |
| TTACCTATCAATTGTGCTAA  | - | 28396 | TGG | 0.241239123 |
| CATCCATTAGCACAATTGAT  | + | 28409 | AGG | 0.17022922  |
| ATACGTCCATCAACAAGCGG  | - | 28429 | TGG | 1.542485179 |
| TTAATACGTCCATCAACAAG  | - | 28432 | CGG | 1.843888503 |
| TTAATACGTCCATCAACAAG  | - | 28432 | CGG | 1.814740761 |
| ACGTAACGCTACAAAGTCTA  | - | 28520 | AGG | 0.860998195 |
| CTAACAAACATCACCTATTTT | - | 28564 | AGG | 1.085371269 |
| TAGTATTAGGAGACTTTACA  | + | 28698 | AGG | 0.594311784 |
| ATGCTTTTAGTTCTTTAGAT  | - | 28776 | GGG | 0.036551382 |
| ATCAAATCAATTGGAACGAT  | + | 28973 | TGG | 0.334917525 |
| ACGACTAATCTTGCAAGAGG  | + | 29069 | TGG | 2.479598615 |
| CAGTGCCTTGTAATATGATT  | - | 29157 | AGG | 2.309746446 |
| CAGTGCCTTGTAATATGATT  | - | 29157 | AGG | 0.138615222 |
| GGAGACCTAATCATATTACA  | + | 29168 | AGG | 0.472102371 |
| TGATTGGTTACACGGTTATT  | + | 29200 | GGG | 1.224505987 |
| TCCGTTTTATCAGTGCCTAT  | - | 29215 | CGG | 1.537772533 |
| TCCGTTTTATCAGTGCCTAT  | - | 29215 | CGG | 0.374130154 |
| ACCGATAGGCACTGATAAAA  | + | 29230 | CGG | 0.359640683 |
| AACTTCAATTGCAGAACAAA  | - | 29258 | AGG | 1.114959464 |
| AACTTCAATTGCAGAACAAA  | - | 29258 | AGG | 0.160501836 |
| GTATTGTTGTACCACTCATA  | - | 29337 | GGG | 1.514067321 |
| CGTATTGTTGTACCACTCAT  | - | 29338 | AGG | 0.227898711 |
| CGTATTGTTGTACCACTCAT  | - | 29338 | AGG | 0.384517768 |
| TGTTTTTGTCCGTGTCTTTA  | - | 29361 | CGG | 1.409201892 |

|                      |   |       |     |             |
|----------------------|---|-------|-----|-------------|
| TGTTTTTGTCGGTGCTTTA  | - | 29361 | CGG | 1.679594972 |
| AACAATACGCCGTAAAGACA | + | 29368 | CGG | 1.451812064 |
| AACAATACGCCGTAAAGACA | + | 29368 | CGG | 0.143131508 |
| GTGTGATATGCGTCAAACAC | - | 29449 | TGG | 0.810306528 |
| TTCCTAAAAGCTGGATTGTA | - | 29485 | TGG | 1.024212475 |
| AGCTTTTAGGAAAGCGAGCA | + | 29512 | TGG | 0.164902319 |
| AGCTTTTAGGAAAGCGAGCA | + | 29512 | TGG | 0.138128853 |
| CGACTAAAGGAGGCAACCAA | - | 29611 | TGG | 0.728858988 |
| CGACTAAAGGAGGCAACCAA | + | 29611 | TGG | 0.837796819 |
| CGACTAAAGGAGGCAACCAA | + | 29611 | TGG | 1.759715146 |
| CGACTAAAGGAGGCAACCAA | - | 29611 | TGG | 0.797645489 |
| AACTATCGCTTGTTAGATGA | + | 29699 | AGG | 2.57947336  |
| CGTATATTTCTTCTTTTGA  | - | 29736 | TGG | 1.826404246 |
| CGTATATTTCTTCTTTTGA  | - | 29736 | TGG | 0.259396907 |
| CATTGATACCGTCGCCGTTA | - | 29850 | TGG | 1.94123913  |
| CGTATTGATAATACAGGTTA | + | 29903 | TGG | 0.030630911 |
| ACTAGATGCTTCACTAAAA  | + | 29968 | AGG | 0.119322577 |
| TGCATTACTGCATTTGTATA | - | 30073 | TGG | 0.03483031  |
| TGCATTACTGCATTTGTATA | - | 30073 | TGG | 0.228382059 |
| ATGCAGTAATGCAATCATT  | + | 30099 | TGG | 1.287905643 |
| TGCAGTAATGCAATCATT   | + | 30100 | GGG | 1.256345686 |
| TATATGACGCAAGCTCGTCC | + | 30146 | AGG | 2.083125602 |
| GATAACATGTAATGATTACC | - | 30148 | TGG | 0.845570649 |
| TCTATCAATAAATTGTCCGT | - | 30182 | TGG | 1.962237833 |
| TCTATCAATAAATTGTCCGT | + | 30182 | TGG | 0.014301187 |
| TCTATCAATAAATTGTCCGT | + | 30182 | TGG | 1.781192094 |
| AGATTGCTTGTTAAAAACGG | + | 30218 | CGG | 0.258470489 |
| ATGGATTTATTCAGCTGTAT | + | 30283 | TGG | 0.580649999 |
| TTATTTCTCCAGTTCTATAT | - | 30321 | TGG | 1.57085193  |
| TTATTTCTCCAGTTCTATAT | - | 30321 | TGG | 0.181172527 |
| AGAACTGGAGAAATAACTTA | + | 30344 | TGG | 1.965308114 |
| AGAACTGGAGAAATAACTTA | + | 30344 | TGG | 0.023479892 |
| TATCTGTCGTTAAATATATT | - | 30373 | CGG | 1.200143023 |
| TACGTCAGCGATTTATAATC | + | 30412 | CGG | 1.903289561 |
| TACGTCAGCGATTTATAATC | + | 30412 | CGG | 0.155638144 |
| TTCTTAAGTTGTCTTTCAGT | - | 30454 | GGG | 1.787480504 |
| ATTCTTAAGTTGTCTTTCAG | - | 30455 | TGG | 0.400768221 |
| GTATCAAATGGATATACCTA | + | 30556 | TGG | 2.245185391 |
| GTATCAAATGGATATACCTA | + | 30556 | TGG | 1.899155926 |
| GTATCAAATGGATATACCTA | - | 30556 | TGG | 0.378483669 |
| TCATAAGTGATACCTTGCAT | - | 30583 | AGG | 1.738956957 |
| TCAGATACACAACCTATGCA | + | 30587 | AGG | 0.582463964 |
| CAAGGTATCACTTATGATGC | + | 30605 | AGG | 1.682837434 |
| ACCTTGTAAGTAGTTAGGGT | - | 30647 | TGG | 0.294253366 |
| TTAAACGACGTATCGATAT  | + | 30713 | TGG | 1.661938757 |



|                       |   |       |     |             |
|-----------------------|---|-------|-----|-------------|
| TTTAAACGACGTATCGATAT  | + | 30713 | TGG | 0.038909536 |
| GACGCAAAGCGCTTTTAATA  | + | 30810 | GGG | 1.322924225 |
| ATAGGGGTAACCTATTGGACC | + | 30827 | TGG | 1.298349782 |
| GAGTGATGTCTGTTGTTACC  | - | 30829 | AGG | 0.314082878 |
| AGAATTGGTTAACACCTCTT  | - | 30867 | TGG | 1.664484783 |
| AGAATTGGTTAACACCTCTT  | - | 30867 | TGG | 1.04407255  |
| AGATATGCTGGGTTCTGTAT  | - | 30949 | TGG | 0.050768949 |
| TAATATCACTTAGATATGCT  | - | 30960 | GGG | 1.735899687 |
| CCGAAAGCGTTTAGAGATGC  | + | 31061 | AGG | 1.488261059 |
| CCGAAAGCGTTTAGAGATGC  | + | 31061 | AGG | 0.446315266 |
| TGGTTCTTTGATGTACTGCC  | + | 31085 | TGG | 0.305439858 |
| TGGTTCTTTGATGTACTGCC  | + | 31085 | TGG | 1.184309003 |
| AGAGCACCATTATAGTGTC   | - | 31087 | AGG | 0.924490576 |
| GTAATGCCTGGACACTATAA  | + | 31097 | TGG | 0.038337337 |
| ATTTCTACCTGTGCTGTTTC  | - | 31124 | TGG | 0.173471682 |
| GTAATGCCTGGACACTATAA  | + | 31133 | AGG | 0.081356303 |
| ATTTTCAATAAGAAAAACAA  | + | 31190 | CGG | 1.227419001 |
| TCCAATAACCGGCGTTTTG   | - | 31213 | CGG | 0.179582474 |
| AGGGATATGTTCCAATAAC   | - | 31223 | CGG | 0.152395683 |
| GTCCGCAAAACGCCGTTAT   | + | 31227 | TGG | 1.634871368 |
| GATAATTTTGTAATATTCTT  | - | 31243 | AGG | 1.757824483 |
| TTATCAGATTTAAAAATCGT  | + | 31277 | TGG | 1.874825276 |
| TTATCAGATTTAAAAATCGT  | + | 31277 | TGG | 0.051879381 |
| GCAATACCTTTAAAGTCTTT  | - | 31333 | AGG | 2.245944886 |
| GATTTTCCTAAAGACTTTAA  | + | 31343 | AGG | 0.052877062 |
| AAAGACTTTAAAGGTATTGC  | + | 31352 | AGG | 1.430898188 |
| AAAGACTTTAAAGGTATTGC  | + | 31352 | AGG | 0.456106228 |
| AGAAGTAAAATCGAATACAC  | + | 31384 | CGG | 1.429795751 |
| GAAGTAAAATCGAATACACC  | + | 31385 | GGG | 1.258952371 |
| AATACTTGTGTTGTGTTACC  | - | 31387 | CGG | 0.033351031 |
| CTAAAAATTGATGTGCAGAC  | - | 31425 | GGG | 1.735365307 |
| ACTAAAAATTGATGTGCAGA  | - | 31426 | CGG | 1.785678519 |
| ACTAAAAATTGATGTGCAGA  | - | 31426 | CGG | 1.319158786 |
| GTAATGTTGGCGTTGGTAAA  | + | 31476 | TGG | 1.871194961 |
| GAGTTTATTTCGAGGGAAAGG | + | 31498 | TGG | 1.209732848 |
| CTGATGTTTGTGTCAATAAT  | - | 31578 | TGG | 1.163395128 |
| TGTTTCAGAACTTATAGATAA | - | 31662 | CGG | 1.263262937 |
| GATGATTATAACGTAGATAG  | + | 31729 | AGG | 2.028683348 |
| CGATAGTAGACGCAATTAAT  | + | 31775 | GGG | 1.877255416 |
| GAATGTTTTAAAAATTCATT  | - | 31800 | CGG | 1.91521383  |
| ATTTTTAAAACATTCAGGCA  | + | 31824 | AGG | 0.011612536 |
| ATTTTTAAAACATTCAGGCA  | + | 31824 | AGG | 0.019636588 |
| TTCAGGCAAGGTGCATGCTC  | + | 31836 | AGG | 1.949014033 |
| TTGAAAATGATTTAGTTAGT  | + | 31919 | GGG | 1.961848574 |
| CAGCCATATTTTGCTTTAAT  | - | 32000 | TGG | 1.662810467 |

|                       |   |       |     |             |
|-----------------------|---|-------|-----|-------------|
| CAGCCATATTTTGCTTTAAT  | - | 32000 | TGG | 1.227419001 |
| TTGTTGAATTACCTTTAACA  | - | 32234 | AGG | 1.31327466  |
| TTGTTGAATTACCTTTAACA  | - | 32234 | AGG | 1.415502087 |
| TCTAAACTTACAGATGATTA  | + | 32287 | CGG | 0.891795206 |
| TAAGCGCAGTTAACACATCT  | + | 32351 | AGG | 1.418252589 |
| TAAGCGCAGTTAACACATCT  | + | 32351 | AGG | 0.369640592 |
| GTGCCTATATCCGTCTTTTC  | - | 32388 | TGG | 0.403244283 |
| TCATCAACACCATCTTGTC   | - | 32421 | AGG | 0.209597595 |
| TCATCAACACCATCTTGTC   | - | 32421 | AGG | 1.270674277 |
| TTAGAGAAGCCTGGACAAGA  | + | 32428 | TGG | 1.4273006   |
| ATAATACTGCTCGTGCAACA  | + | 32531 | TGG | 0.769211597 |
| ACTCATCGTTTGAATCGTCT  | - | 32540 | GGG | 1.209771861 |
| TACTCATCGTTTGAATCGTC  | - | 32541 | TGG | 1.837085952 |
| TACACAAAATACAAAATCTA  | + | 32578 | CGG | 1.938087006 |
| TACACAAAATACAAAATCTA  | + | 32578 | CGG | 0.139000963 |
| AATACAAAATCTACGGCACA  | + | 32585 | TGG | 0.268429478 |
| CATCATTCTTTTATAAAAC   | - | 32594 | GGG | 1.189334818 |
| CATAAGATGACAGAGGCGAA  | + | 32734 | TGG | 0.049521228 |
| TCAACGCTACCTGGTAAATC  | - | 32823 | CGG | 2.213265962 |
| ACAAGAGTGCCGGATTTACC  | + | 32830 | AGG | 0.439677757 |
| ACAAGAGTGCCGGATTTACC  | + | 32830 | AGG | 1.914905024 |
| TCATAACTTTCAACGCTACC  | - | 32832 | TGG | 1.42308999  |
| AAGTTATGAGGGTTATTTAT  | + | 32862 | CGG | 0.25803166  |
| TAAATCTTTTATAGAGTTATA | - | 32910 | AGG | 1.704724048 |
| TACACACGATCAATCACAAA  | + | 32947 | CGG | 1.592578161 |
| TACACACGATCAATCACAAA  | + | 32947 | CGG | 1.617654266 |
| ACCGTTGATTTATGTTTCATT | - | 32979 | AGG | 0.272366752 |
| AAAATAGAATAGTTTGTGTA  | - | 33054 | CGG | 2.44515716  |
| TTGGTAAGTGGAACCTTATCC | + | 33094 | AGG | 0.82739984  |
| AATCCCTCAATAACGCCACC  | - | 33096 | TGG | 0.025589154 |
| GTAAGTGGAACCTTATCCAGG | + | 33097 | TGG | 0.308497036 |
| TTAGGTAAAACATCAGGTTC  | + | 33280 | TGG | 1.529591269 |
| TTAGGTAAAACATCAGGTTC  | + | 33280 | TGG | 2.165964173 |
| TTTAGTTATAGTAACTTTGT  | - | 33295 | TGG | 1.946437531 |
| GTTACTATAACTAAAATTAT  | + | 33319 | GGG | 0.743271906 |
| TACTATAACTAAAATTATG   | + | 33320 | GGG | 1.608991519 |
| AACTCTTCTTTAAATTTAAT  | - | 33428 | AGG | 1.607842441 |
| AACTCTTCTTTAAATTTAAT  | - | 33428 | AGG | 0.732796262 |
| TTAGTGAAAACAACTTTCT   | - | 33455 | AGG | 0.891676868 |
| TTAGTGAAAACAACTTTCT   | - | 33455 | AGG | 0.126455992 |
| CTTTGTTGGTTTGATGCATT  | - | 33521 | CGG | 1.476567009 |
| TTAAATCTGACGCACTTTGT  | - | 33535 | TGG | 2.088495637 |
| TGATGAGGAACTTCGCGGAA  | + | 33575 | TGG | 0.367871977 |
| TGTTTTGTTAGTTTTAGTT   | - | 33669 | CGG | 0.141047068 |
| AACTAACAAAACAAATACTG  | + | 33695 | AGG | 0.807693556 |

|                      |   |       |     |             |
|----------------------|---|-------|-----|-------------|
| CTAACAAAACAAATACTGAG | + | 33697 | GGG | 0.021223383 |
| GTTTTAATGTCTTTAAAAGT | - | 33731 | TGG | 0.181577835 |
| CATTAAAACTTTTTATGTGT | + | 33761 | GGG | 0.287331958 |
| AATTAAGTGGTACGTAGACA | + | 33803 | TGG | 1.30624871  |
| GGCAAAGATGAAAAGTCAC  | + | 33878 | AGG | 1.642805507 |
| GGCAAAGATGAAAAGTCAC  | + | 33878 | AGG | 1.021566054 |
| CCATTCATGTTCGTGCCGTT | - | 33943 | TGG | 1.449380218 |
| ACTCTCAATGAGATTAAATT | + | 34024 | AGG | 2.445606692 |
| CGTCTATCTGTCTTTCCCTC | - | 34085 | TGG | 0.266808247 |
| TGTGGATTCTCGGTTTGATA | + | 34169 | GGG | 2.032369639 |
| TCCTAAAATCCCTTTAAGCA | - | 34242 | TGG | 2.183850008 |
| TCCTAAAATCCCTTTAAGCA | - | 34242 | TGG | 1.627126053 |
| AGGTGATTACCATGCTTAAA | + | 34249 | GGG | 0.019454768 |
| ACAGTTAAGAGTCAGTGCTT | + | 34322 | CGG | 2.172790407 |
| ATTGAAATGAGGTGCATACA | + | 34363 | TGG | 0.726311339 |
| TTGAAATGAGGTGCATACAT | + | 34364 | GGG | 1.236767396 |
| AAAGCCTACAGCTAGTGAAG | + | 34408 | TGG | 2.451300771 |
| GAGTGGGCAAAGTCGAATAT | + | 34433 | TGG | 1.209608734 |
| ATTAATATAGATAATTATCG | + | 34463 | GGG | 1.068353307 |
| ATTATCGGGGCAGTCAATGT | + | 34476 | TGG | 1.112627447 |
| ATTATCGGGGCAGTCAATGT | + | 34476 | TGG | 1.052605343 |
| ATATTGGGGTTTTGTAACAT | + | 34525 | GGG | 1.079227658 |
| GGCTAATTACAGATATCCTA | + | 34564 | AGG | 1.814851931 |
| CGATTCTATCGTTATTCATC | + | 34592 | TGG | 0.82358518  |
| TCTGGATTTGTACCGGAACC | + | 34610 | TGG | 0.155638144 |
| TCCGAACCTATCCGTTGCC  | - | 34636 | AGG | 0.813334818 |
| AATAGTTGGACAGGTTCTCC | + | 34751 | GGG | 1.359610359 |
| GGGTGTCTTACTAACTTCC  | - | 34753 | CGG | 0.365123231 |
| AAGCCTGTAACACTTACATA | - | 34774 | AGG | 2.178135874 |
| GCCAATGACTCAACAATTAC | + | 34880 | TGG | 0.508564077 |
| CATTGATCATATAGTTGTAA | + | 34987 | TGG | 1.102436855 |
| ATTGATCATATAGTTGTAAT | + | 34988 | GGG | 1.13753173  |
| GATGAACGCTCAGATATTCA | + | 35012 | AGG | 1.505091599 |
| CTAGCCAATTAGGGTGACGC | - | 35163 | GGG | 1.715910539 |
| GTGGTGTTTGGTTATTGTCA | + | 35274 | GGG | 0.604866424 |
| TCATACTACGCCAAATATTA | - | 35319 | GGG | 0.616994072 |
| TTCATACTACGCCAAATATT | - | 35320 | AGG | 0.917388216 |
| TAAAGGTAGACCCTAATATT | + | 35325 | TGG | 0.16075782  |
| CTTGATTAAGCAAGGTATAC | + | 35377 | CGG | 0.205406155 |
| TGCTCATACTTTGCGTTATC | - | 35380 | CGG | 0.016607729 |
| ATGCTTGGTTTTTCGTCTGA | - | 35542 | TGG | 1.405931236 |
| CTTGTTTTAGTAACGATGCT | - | 35557 | TGG | 0.140506658 |
| TTTGTCTATCCAGTGCTTGC | - | 35592 | TGG | 1.741366609 |
| TTTGTCTATCCAGTGCTTGC | - | 35592 | TGG | 0.756491172 |
| ATTCACATTCCAGCAAGCAC | + | 35599 | TGG | 1.511485823 |

|                       |   |       |     |             |
|-----------------------|---|-------|-----|-------------|
| CACTGGATAGACAAATGTCT  | + | 35616 | AGG | 2.258521706 |
| ACTGGATAGACAAATGTCTA  | + | 35617 | GGG | 2.058962949 |
| CTGGATAGACAAATGTCTAG  | + | 35618 | GGG | 0.017563332 |
| AACACGAGCACAAACGAGCT  | + | 35680 | CGG | 1.692564818 |
| AATGAATGTTAAGCGAATAT  | + | 35704 | GGG | 1.558326918 |
| TGCTATCAAATGCTTAATTT  | + | 35741 | AGG | 1.229331017 |
| CTTAATTTAGGCAAGTATCA  | + | 35753 | AGG | 2.443518863 |
| GCGCTTAACAAAATACTTAA  | + | 35789 | AGG | 2.165400267 |
| GCGCTTAACAAAATACTTAA  | + | 35789 | AGG | 0.038909536 |
| AAAGGAACGCTCGACGGACA  | + | 35813 | AGG | 0.881949484 |
| CGGACAAGGCAAAGCATTCCG | + | 35827 | CGG | 0.099286402 |
| GCGCACGCTTTCTTAGAAAG  | + | 35891 | TGG | 0.035667075 |
| GCATATAATTACTTCGGTAT  | + | 35948 | TGG | 0.8637917   |
| GCATATAATTACTTCGGTAT  | + | 35948 | TGG | 1.473374431 |
| CCGCCCATGATTGCTTTTGC  | - | 36016 | TGG | 0.839797486 |
| ATCTCCAGCAAAGCAATCA   | + | 36028 | TGG | 0.010751319 |
| CCAGCAAAGCAATCATGGG   | + | 36032 | CGG | 1.582321132 |
| AGAAAGGATTACATCAATAA  | + | 36068 | AGG | 0.030803383 |
| ACACATTGTACCGAATTAGA  | + | 36096 | TGG | 0.876437299 |
| CGATTGTACTTGCTTGATGT  | - | 36132 | TGG | 2.137163487 |
| CGATTGTACTTGCTTGATGT  | - | 36132 | TGG | 1.060748066 |
| GCTAAGTTATATAAACAAAT  | + | 36170 | CGG | 1.656897743 |
| TAAAAGGTATCTACTTCACA  | + | 36195 | AGG | 0.199622837 |
| AAAAGGTATCTACTTCACAA  | + | 36196 | GGG | 0.719826417 |
| ATAGGTATCAATGACAAACA  | + | 36353 | AGG | 0.13087753  |
| ACAACATCGTCGATAATAAG  | - | 36439 | GGG | 1.948547097 |
| TTACAACATCGTCGATAATA  | - | 36441 | AGG | 1.617256038 |
| TTACAACATCGTCGATAATA  | - | 36441 | AGG | 0.153692667 |
| GCGTGTTTGATAACCTTTTT  | - | 36487 | AGG | 1.797620565 |
| TCTTTCAATATCGTTGATAG  | + | 36590 | TGG | 2.148671046 |
| AAAAGAAATCGATGTTAAAT  | + | 36631 | TGG | 0.367871977 |
| AGTAGATTTAAAGGTGCGAA  | + | 36764 | AGG | 1.929766849 |
| GAAAGGTGATAAAGGCGAAC  | + | 36781 | CGG | 1.785636428 |
| CCTTTTGCACCAGGTTGTCC  | - | 36784 | CGG | 0.940313788 |
| CCTTTTGCACCAGGTTGTCC  | - | 36784 | CGG | 1.715403024 |
| CCTGGTGCAAAGGTGAAGC   | + | 36809 | AGG | 1.904850669 |
| CCTGGTGCAAAGGTGAAGC   | + | 36809 | AGG | 0.165365528 |
| AAAGGAGAACAAGGCGCACC  | + | 36836 | CGG | 1.56439714  |
| ACTACAGTACCGTTTTTACC  | - | 36838 | GGG | 2.024754153 |
| ACTAAAATGTGGCAAATTGA  | + | 36893 | TGG | 1.329970834 |
| TTGATTTTGTCCAATAACTC  | - | 36925 | AGG | 2.823535332 |
| TTGATTTTGTCCAATAACTC  | - | 36925 | AGG | 1.095692535 |
| CAACGACTCTAAAACGTATA  | + | 37030 | CGG | 2.07332242  |
| CAACGACTCTAAAACGTATA  | + | 37030 | CGG | 1.262128075 |
| CTTAATGTGTTTCATAGATTC | - | 37069 | AGG | 1.997460779 |

|                       |   |       |     |             |
|-----------------------|---|-------|-----|-------------|
| CTTAATGTGTTTCATAGATTC | - | 37069 | AGG | 1.283534325 |
| GAAAGTGTATTGCAACAGAT  | + | 37145 | TGG | 1.858578838 |
| TCGTCATGATTATGATTTTT  | - | 37213 | TGG | 0.573915657 |
| AAAAAGCGCATCTCAACCGA  | + | 37312 | CGG | 0.522036275 |
| AAAAAGCGCATCTCAACCGA  | - | 37312 | CGG | 0.058364304 |
| CTCAACCGACGGTAAAATT   | + | 37323 | TGG | 0.032043147 |
| CCGACGGTAAAATTTGGAC   | + | 37328 | AGG | 1.127034837 |
| TAATTAAGTAAAGTGTATTA  | - | 37371 | GGG | 0.014461951 |
| TTAATTAAGTAAAGTGTATT  | - | 37372 | AGG | 2.249905882 |
| TTAATTAAGTAAAGTGTATT  | - | 37372 | AGG | 0.164757567 |
| TAATACACTTTACTTAATTA  | + | 37390 | AGG | 0.274451192 |
| AATACACTTTACTTAATTA   | + | 37391 | GGG | 0.780203283 |
| TAATTAAGGGGTGATTTTTA  | + | 37404 | TGG | 2.194559108 |
| TAATTAAGGGGTGATTTTTA  | + | 37404 | TGG | 0.482766466 |
| GGTTTTATTACAAAAGATGA  | - | 37500 | AGG | 0.240662686 |
| CTATCCGGATATTTATTTTT  | - | 37527 | AGG | 1.355781167 |
| GTTGATTCTTCTATGCTATC  | - | 37542 | CGG | 1.934327286 |
| GTTGATTCTTCTATGCTATC  | - | 37542 | CGG | 1.461415794 |
| TAGAAGAATCAACAGCAAAA  | + | 37568 | TGG | 0.016860799 |
| GTCACCTGATAACTTTTATT  | - | 37593 | AGG | 1.516573993 |
| GTCACCTGATAACTTTTATT  | - | 37593 | AGG | 0.77111626  |
| TGAACCTAATAAAAGTTATC  | + | 37605 | AGG | 1.06231262  |
| ACAATAGAAAATGTACGTAG  | + | 37630 | CGG | 1.795397163 |
| ACAATAGAAAATGTACGTAG  | + | 37630 | CGG | 0.019454768 |
| ATGTACGTAGCGGTATAATG  | + | 37640 | AGG | 2.505175513 |
| AGGGTTTCGCAAATAATTT   | + | 37660 | AGG | 1.598724172 |
| AGGGTTTCGCAAATAATTT   | + | 37660 | AGG | 0.916911675 |
| TCAAGTGATTTAGGAATATC  | + | 37684 | AGG | 1.589454547 |
| GTGACATACAACATCCCTGA  | - | 37734 | AGG | 0.436553204 |
| TCAACTTTAGTAATCCTTCA  | + | 37736 | GGG | 1.563385158 |
| AATTATTCAATGGTCAATGT  | - | 37782 | CGG | 1.80745807  |
| AATTATTCAATGGTCAATGT  | - | 37782 | CGG | 1.696733697 |
| GAAACACTTTCTTCATCTAC  | - | 37945 | TGG | 0.056319194 |
| GAAACACTTTCTTCATCTAC  | - | 37945 | TGG | 1.042775566 |
| CATTTCCCTTCTTGAGATGT  | - | 38017 | TGG | 1.314913439 |
| ATAATCCAACATCTCAAGAA  | + | 38028 | GGG | 0.679219485 |
| AACATCTCAAGAAGGGAAAT  | + | 38035 | GGG | 0.339946473 |
| TTTGTGTCGTTTCATATTCGT | - | 38125 | AGG | 0.539545566 |
| TGAACGACACAAATGATTTA  | + | 38151 | GGG | 1.939918297 |
| CACAAATGATTTAGGGTAGG  | + | 38158 | TGG | 1.215038694 |
| CACAAATGATTTAGGGTAGG  | + | 38158 | TGG | 1.300226996 |
| AAATGGTTTGACAATTCATT  | + | 38215 | AGG | 1.600478916 |
| GAAATCCATACCAACCATCT  | - | 38234 | GGG | 1.078572339 |
| TGAAATCCATACCAACCATC  | - | 38235 | TGG | 1.502237484 |
| CGCTAACATAAAGAACATAT  | - | 38272 | TGG | 0.275463812 |

|                      |   |       |     |             |
|----------------------|---|-------|-----|-------------|
| CGCTAACATAAAGAACATAT | - | 38272 | TGG | 0.077613202 |
| GCGACAGGCGAAAGGCTGCA | + | 38308 | AGG | 0.013311157 |
| TCTTTGCTTTATTATCAAAC | - | 38333 | GGG | 0.489542673 |
| GTTTTCCCGTCAAAGTATGG | + | 38437 | TGG | 0.742523646 |
| TCAAAGTATGGTGGCGGAGC | + | 38446 | TGG | 1.792220874 |
| TCAAAGTATGGTGGCGGAGC | + | 38446 | TGG | 0.088627277 |
| TTAAATACTTTCACATCATT | + | 38497 | TGG | 0.979812862 |
| TCACATCATTTGGTCAAAAC | + | 38507 | TGG | 0.014148922 |
| TCATTTGGTCAAACTGGAA  | + | 38512 | CGG | 2.054631021 |
| TCATTTGGTCAAACTGGAA  | + | 38512 | CGG | 0.04173932  |
| GGTCAAACTGGAACGGTAA  | + | 38518 | AGG | 0.653124355 |
| AAAACTGGAACGGTAAAGGT | + | 38522 | TGG | 0.020878288 |
| ACAGTTTCAGGACCCCAACC | - | 38547 | AGG | 1.150610566 |
| ATGGCGTTGCGCAACCTGGT | + | 38549 | TGG | 0.45276551  |
| GGCGTTGCGCAACCTGGTTG | + | 38551 | GGG | 1.988482079 |
| TTTAACCTAATAAAATACAT | - | 38598 | TGG | 0.055042758 |
| TTGCCAACGCTTAAGTTGTT | - | 38625 | AGG | 0.036641267 |
| GCAAGCGACTACAAAAAAG  | + | 38685 | AGG | 0.217435643 |
| AAAAAAATTATGCTTGTAGC | + | 38722 | CGG | 1.902457104 |
| TATAACGATCCTGGAGCAGT | + | 38752 | AGG | 0.334960354 |
| GATCCTGGAGCAGTAGGAAA | + | 38758 | CGG | 1.943531325 |
| CTTAAATACTTAGCGATATT | - | 38802 | AGG | 0.508936731 |
| CTTAAATACTTAGCGATATT | - | 38802 | AGG | 1.990871261 |
| GCTAAGTATTTAAGACATGC | + | 38827 | AGG | 1.173595736 |
| GGACATGAAGTTGCATTATA | + | 38848 | CGG | 0.914374097 |
| ATGTATCAAGATACTGCATA | + | 38893 | CGG | 1.347881352 |
| AAAAAGATTATGGCTTATAT | + | 38933 | TGG | 2.321083523 |
| AAAAAGATTATGGCTTATAT | + | 38933 | TGG | 1.709827499 |
| AAAAGATTATGGCTTATATT | + | 38934 | GGG | 2.848178038 |
| CAGGAGAAAGCGCAAGTGGT | + | 39005 | GGG | 0.336652073 |
| ACATTTAGTAAATCATTACG | - | 39108 | AGG | 1.121369141 |
| ACATTTAGTAAATCATTACG | - | 39108 | AGG | 1.171177035 |
| TATTACTAATAAAAATGATA | + | 39198 | TGG | 1.14499416  |
| CTAATAAAAATGATATGGAT | + | 39203 | TGG | 1.175659019 |
| AGGCTTACCATGAATCGCAC | - | 39247 | CGG | 1.890414783 |
| AGTGTATAACCTGCTGGCAC | - | 39327 | TGG | 0.84501362  |
| TTATCGAGTGATAACCTGC  | - | 39333 | TGG | 1.492282537 |
| TACACAGTAGCTAATGTTAA | + | 39406 | AGG | 0.029182152 |
| TCAACTAATTCAGAATTAC  | + | 39451 | AGG | 1.942019683 |
| GACGGTGCAATTGTATTAA  | + | 39505 | TGG | 2.422118619 |
| GACGGTGCAATTGTATTAA  | + | 39505 | TGG | 1.924253419 |
| AGCGACAGGAGAGGTAGACA | + | 39576 | AGG | 1.055226617 |
| AGCGACAGGAGAGGTAGACA | + | 39576 | AGG | 0.569635608 |
| AGAAATGTTAAAAAGTGTAT | - | 39712 | AGG | 0.750585429 |
| AAGATTTAAATGTAGATAAC | + | 39754 | AGG | 1.605296287 |

|                        |   |       |     |             |
|------------------------|---|-------|-----|-------------|
| AAGATTTAAATGTAGATAAC   | + | 39754 | AGG | 0.090788917 |
| TAGATAACAGGCAGGTACTION | + | 39766 | CGG | 0.319058196 |
| TAGCTATAACATAAAAAAAT   | - | 39779 | AGG | 0.077819072 |
| TTTATGTTATAGCTAGCCTT   | + | 39803 | CGG | 2.217843554 |
| TTATGTTATAGCTAGCCTTC   | + | 39804 | GGG | 0.91715335  |
| AAAACATCCAGTGACATGCT   | - | 39871 | TGG | 0.778190721 |
| TGCTAAAGTCATATATACTA   | - | 39930 | CGG | 0.565269093 |
| TGCTAAAGTCATATATACTA   | - | 39930 | CGG | 0.563815576 |
| TATAATTGCTTTTATATAGT   | + | 40003 | AGG | 1.904856957 |
| GTAGGAGTGAACATATATAGC  | + | 40021 | CGG | 0.706267033 |
| TAGGAGTGAACATATATAGCC  | + | 40022 | GGG | 1.557246098 |
| TCAGATACATGGCCTCTGCC   | - | 40024 | CGG | 0.513605876 |
| TAACCGTATCGATTAAGATA   | - | 40130 | CGG | 1.938836337 |
| TAACCGTATCTTAATCGATA   | + | 40143 | CGG | 2.099712801 |
| AATAGGATCTGTGGTTTTGT   | - | 40170 | TGG | 1.074875933 |
| AACCACAATCCTAAATTAAT   | - | 40187 | AGG | 1.810831088 |
| GTTATTTTTTGGCTTTTTTT   | + | 40223 | GGG | 0.122714691 |
| CGTTTTTTTTGGGGCAAAAAA  | + | 40234 | AGG | 0.074576611 |
| TGAAAAAGGGCAAACGCTTG   | + | 40267 | TGG | 1.55891902  |
| ACGCTTGTGGAAAAGCTAAA   | + | 40280 | AGG | 1.298394301 |
| GACCGTTTTACCATCATACA   | + | 40364 | AGG | 1.755702746 |
| GTTTACCATCATACAAGGAT   | + | 40369 | GGG | 1.638369393 |

**Average Normalized Reads Figure 1**

20.90219172  
2.383410375  
2.383410375  
697.7116479  
697.7116479  
592.1677927  
592.1677927  
3168.420918  
830.1406316  
1151.547565  
1135.007191  
1135.007191  
550.6437187  
3268.408611  
101.7061034  
293.0647992  
486.9472358  
240.2854048  
240.2854048  
1135.220477  
1135.220477  
8354.24574  
409.5136758  
12.06733801  
4156.022651  
4156.022651  
5760.775979  
8013.855138  
391.0042968  
2758.069079  
6691.787517  
6691.787517  
2002.297307  
2002.297307  
4.509187372  
6750.231578  
755.3532431  
13220.04828  
13220.04828  
13220.04828  
8700.532996  
3734.954491  
369.5609944  
6878.110797



2.297532582  
2.297532582  
322.0747997  
2166.054187  
3049.303797  
3049.303797  
3302.725889  
3302.725889  
13510.65194  
5247.932166  
5247.932166  
5163.096371  
5163.096371  
1036.131585  
416.0201751  
4731.345425  
4731.345425  
176.2570763  
3185.1424  
3185.1424  
19382.03766  
2780.197042  
657.4457238  
657.4457238  
1459.023644  
1919.574822  
1919.574822  
615.826068  
19.76607079  
3301.826334  
3912.019662  
1485.574008  
1485.574008  
20131.30871  
1748.911064  
524.2361475  
6231.615296  
7.446982125  
5447.897494  
5447.897494  
57.03803758  
57.03803758  
42.37817581  
680.2883617  
1236.084446

624.2473211  
1647.643351  
2301.762868  
2301.762868  
2244.768473  
2244.768473  
2220.453947  
357.7609437  
2004.471254  
18.56760296  
18.56760296  
2542.891464  
2542.891464  
4232.917062  
4232.917062  
7371.420885  
7371.420885  
912.1853967  
2285.16442  
2285.16442  
2389.140051  
2389.140051  
487.716013  
487.716013  
9871.50066  
9871.50066  
1525.269006  
1525.269006  
1666.988428  
1666.988428  
2.119894272  
220.9857292  
14270.67436  
14270.67436  
703.3941623  
514.9466641  
2309.937598  
2309.937598  
1219.505306  
373.7978665  
1159.988025  
5087.422853  
5087.422853  
440.3945347  
14575.17619

272.6561031  
272.6561031  
6541.468551  
1236.378129  
1236.378129  
2009.16024  
2009.16024  
2115.903671  
2603.110803  
1040.918921  
6164.077342  
6164.077342  
375.483344  
2834.831956  
2834.831956  
1661.30903  
1661.30903  
275.7792287  
3738.058009  
3738.058009  
2.297532582  
10844.56351  
36.77198513  
219.9272403  
1332.721295  
771.1541537  
2991.117118  
2991.117118  
335.1917776  
1182.091902  
1182.091902  
904.2964052  
706.6488211  
71.46907634  
8618.547412  
8618.547412  
656.459889  
2049.254308  
2049.254308  
6541.468551  
1730.272769  
1730.272769  
1720.761803  
3498.328293  
12.19821615

12.19821615  
3718.693773  
3718.693773  
1643.857285  
1643.857285  
104.4745057  
816.5610798  
84.48579624  
250.7280541  
3986.577123  
3986.577123  
301.83082  
43.05197451  
43.05197451  
4348.283366  
4348.283366  
2342.481914  
1.458162653  
707.3246812  
435.5570713  
1433.309177  
1588.986857  
134.0488963  
134.2586129  
134.2586129  
387.5394699  
917.0275863  
917.0275863  
1849.602019  
1480.132584  
134.489749  
4497.355243  
663.8188819  
663.8188819  
1459.646208  
5820.627673  
74.43216181  
579.4607458  
73.83926307  
1915.261121  
1915.261121  
9531.502389  
617.2048388  
336.7835331  
19.30550838

714.4652583  
2488.53575  
2488.53575  
724.4694679  
724.4694679  
1278.724377  
3949.92968  
3949.92968  
27.25217054  
2.14136372  
376.7862427  
5395.667103  
2582.57711  
644.1240571  
82.82440292  
1063.425137  
1063.425137  
592.8386251  
592.8386251  
592.8386251  
88.96526835  
19.45961579  
19.45961579  
544.4390482  
2853.812205  
295.808514  
295.808514  
81.01508655  
3.421888062  
259.7764457  
3912.696529  
3912.696529  
340.1233147  
340.1233147  
473.303779  
473.303779  
973.319221  
99.72327166  
480.0383981  
569.1028178  
389.2343997  
752.9924088  
448.7010997  
448.7010997  
61.51605151

1774.41908  
749.1986008  
884.5318426  
884.5318426  
1570.9397  
1570.9397  
1824.932669  
1824.932669  
139.2039269  
587.1889922  
13.48844449  
141.3047148  
783.1519038  
2711.450713  
269.2912825  
269.2912825  
486.1587489  
486.1587489  
553.2412202  
1962.86497  
226.1096364  
155.5063772  
155.5063772  
383.2412057  
383.2412057  
4494.196317  
4494.196317  
2275.221099  
288.0829823  
30.9805136  
30.9805136  
457.3710354  
3.685404165  
193.2333254  
629.0342531  
629.0342531  
568.2684257  
7.306399986  
139.735082  
1742.739176  
1742.739176  
3249.95836  
3249.95836  
3537.975476  
3537.975476

389.2455619  
491.1075825  
122.0515477  
80.28482368  
931.3507245  
1685.932877  
1685.932877  
260.0787778  
513.121811  
812.5683157  
812.5683157  
2034.588664  
2483.980154  
9.34629919  
546.1939118  
3064.102429  
3064.102429  
36.295836  
578.9249645  
578.9249645  
2327.264398  
2327.264398  
17.66382469  
156.850405  
156.850405  
2370.79408  
2660.659128  
2660.659128  
356.2145902  
942.8701142  
942.8701142  
178.0461297  
799.1016923  
486.4095947  
93.10711202  
238.4689992  
238.4689992  
1266.892399  
100.8214315  
35.702334  
563.7521491  
563.7521491  
439.81134  
439.81134  
2328.609029

307.2278973  
599.3306942  
278.9619365  
146.3709513  
777.7197818  
115.9092241  
84.74725089  
133.7365585  
258.8973549  
258.8973549  
1742.308378  
1742.308378  
53.41528194  
238.948668  
687.4551344  
443.9078816  
443.9078816  
1452.552541  
4285.460041  
3481.592181  
3481.592181  
784.8571409  
520.9858134  
313.1149506  
76.42530085  
76.42530085  
230.7658419  
48.7887417  
77.94198912  
1486.524848  
1486.524848  
184.3417059  
95.21554247  
1.479632101  
724.4471935  
724.4471935  
542.8947561  
542.8947561  
2802.769325  
2802.769325  
1362.543967  
1362.543967  
262.8113304  
1717.850254  
1717.850254



520.6567324  
520.6567324  
933.2335  
1339.168012  
116.1786229  
1076.6205  
1076.6205  
247.9326513  
826.75238  
136.3934906  
113.025832  
432.5584378  
116.9788752  
547.3192222  
387.7074042  
387.7074042  
351.2578124  
87.31594212  
289.1170854  
289.1170854  
1279.811526  
1279.811526  
742.432155  
3862.237543  
3862.237543  
817.7645254  
566.3922879  
109.7268779  
109.7268779  
185.5166428  
1.479632101  
101.5717056  
295.8787551  
295.8787551  
5071.419163  
5071.419163  
982.2131036  
45.14245516  
273.4540423  
273.4540423  
3481.762832  
1426.671397  
1426.671397  
175.2694817  
92.13716558

92.13716558  
1141.847899  
1141.847899  
41.427939  
333.9045656  
333.9045656  
199.4759569  
347.3515294  
449.7158448  
449.7158448  
100.7649673  
200.0173693  
471.2215442  
1231.815746  
1231.815746  
77.99463201  
211.2427227  
81.80975777  
205.5476879  
743.8546697  
743.8546697  
1022.617598  
1022.617598  
251.3757072  
49.71605087  
34.71680084  
34.71680084  
546.6092722  
546.6092722  
325.4311729  
1415.821583  
1386.769348  
1386.769348  
2.076955376  
19.51432013  
36.81140439  
39.00158973  
138.8704213  
95.75494339  
52.98971425  
52.98971425  
651.4502167  
651.4502167  
174.0063539  
1526.897718

1526.897718  
2617.847339  
2617.847339  
258.4717872  
524.5644736  
524.5644736  
899.4667343  
899.4667343  
4098.871534  
4098.871534  
2485.156095  
953.7254091  
549.1711758  
549.1711758  
3737.422062  
293.321276  
484.8679173  
52.32798263  
201.4352578  
1345.67416  
1345.67416  
5.854120058  
5.854120058  
5.526195611  
5.526195611  
294.7832599  
1878.093234  
1878.093234  
606.4336119  
606.4336119  
28.47034799  
28.47034799  
59.8587811  
409.6804536  
503.8110598  
503.8110598  
457.4207619  
32.47191115  
32.47191115  
1666.647834  
1666.647834  
266.0558818  
297.5063602  
76.51560318  
333.771626

101.4781853  
101.8546297  
55.81810031  
2440.102083  
12.37967573  
12.37967573  
128.4077109  
55.57987493  
92.37569259  
624.8059783  
42.9172751  
1574.555267  
1574.555267  
216.0136663  
85.25633328  
350.7475235  
350.7475235  
296.3122669  
296.3122669  
100.2926395  
325.8116902  
325.8116902  
28.65180757  
731.0544541  
9.233069224  
14.98954604  
198.3506966  
89.72494484  
150.102814  
150.102814  
2392.944668  
10.89622236  
644.8867499  
22.79768751  
22.79768751  
138.692783  
138.692783  
25.95988074  
23.75617013  
133.8680399  
290.4149563  
23.76381268  
120.5410438  
120.5410438  
120.5410438

120.5410438  
77.3176153  
86.5309749  
891.867103  
891.867103  
727.7379517  
186.4033761  
71.7387768  
71.7387768  
1959.494267  
1959.494267  
1109.254814  
133.5803897  
133.5803897  
434.5095428  
434.5095428  
3.093963615  
412.2015297  
204.2383531  
1825.725882  
1825.725882  
224.5682107  
224.5682107  
5651.876602  
5651.876602  
4.53065682  
97.17780969  
2565.699307  
2565.699307  
55.73634542  
79.35545306  
33.27216345  
14.58162653  
58.72472162  
71.24291804  
71.24291804  
428.0789657  
428.0789657  
57.55742724  
426.5040534  
21.34334613  
464.2068674  
576.6662479  
99.42209612  
99.42209612

453.123856  
453.123856  
352.4050955  
87.21477923  
87.21477923  
39.48362158  
868.1651856  
868.1651856  
330.8476582  
191.0351958  
191.0351958  
15.29011831  
675.1875321  
375.2051461  
375.2051461  
124.3143872  
20.08046996  
20.08046996  
469.7479965  
8.9207315  
261.3899223  
261.3899223  
38.55042968  
1118.805199  
101.303765  
311.4765349  
254.1543667  
254.1543667  
941.7242893  
941.7242893  
145.6953927  
145.6953927  
100.1776497  
179.6763496  
4721.186253  
4721.186253  
59.37086652  
59.37086652  
1418.371973  
1418.371973  
1481.599949  
23.27383664  
32.79395287  
19.54167231  
80.3101144

80.3101144  
982.4593732  
982.4593732  
385.1772773  
385.1772773  
125.7025604  
125.7025604  
197.2354418  
76.48206665  
527.9807306  
527.9807306  
685.5093588  
685.5093588  
721.4949685  
721.4949685  
6.994062262  
22.08125154  
22.08125154  
385.315798  
750.9889625  
750.9889625  
45.01363847  
1249.698891  
1249.698891  
7659.594268  
32.60867201  
48.09965791  
131.1387553  
91.61219483  
729.8695115  
729.8695115  
64.34680065  
996.6933156  
996.6933156  
392.3960397  
392.3960397  
201.7764059  
46.37415788  
773.0376823  
700.4130771  
700.4130771  
62.87450946  
274.1804339  
469.4804074  
466.2429453

466.2429453  
129.8629571  
129.8629571  
232.3925421  
7.774906572  
42.24966075  
384.8922917  
384.8922917  
831.0759349  
920.7491917  
920.7491917  
1993.995067  
1993.995067  
562.7696323  
16.67623008  
429.6818334  
429.6818334  
2827.894662  
2827.894662  
493.2083705  
37.48872273  
185.0716671  
185.0716671  
39.6418519  
1493.762114  
799.943727  
10.0606737  
70.55559407  
97.4348398  
136.6081851  
89.65229069  
1121.37384  
184.5693223  
254.7855281  
104.2106879  
104.2106879  
1176.409336  
1330.989561  
1330.989561  
153.7811789  
153.7811789  
25.61636957  
1.01700824  
119.9852012  
119.9852012



43.64723633  
2315.054516  
244.3145718  
92.75801975  
525.537688  
313.1108777  
313.1108777  
130.7346571  
520.2799863  
520.2799863  
196.7407896  
1155.159007  
716.5522693  
869.915473  
869.915473  
160.3775789  
46.14181522  
732.6764281  
166.4337731  
131.1858171  
131.1858171  
614.6829078  
148.3281907  
420.1870079  
420.1870079  
969.5475874  
660.0903872  
555.5949154  
37.10197103  
624.3015721  
624.3015721  
67.69015183  
631.2023657  
631.2023657  
584.7482128  
4.595065164  
13.17610677  
173.4004831  
173.4004831  
198.0892419  
198.0892419  
628.8233799  
628.8233799  
564.2845107  
82.37942723

82.37942723  
209.1616444  
209.1616444  
114.2757862  
898.4576203  
291.0960959  
291.0960959  
417.8603633  
417.8603633  
510.8316193  
510.8316193  
42.96991799  
42.60287592  
131.0084804  
113.6778596  
20.12929158  
551.1392758  
47.60410078  
47.95701431  
182.3503266  
352.1844683  
352.1844683  
98.41685333  
113.4590423  
1647.157698  
1647.157698  
111.1291797  
62.07043589  
37.84399935  
37.84399935  
115.1633745  
115.1633745  
20.59779817  
376.596789  
376.596789  
40.16269975  
388.318906  
119.2943576  
81.69592453  
22.26683403  
2.625457029  
801.3544762  
801.3544762  
28.76885881  
1.280524342

2541.283517  
93.24829742  
25.08139319  
1153.724024  
30.82640619  
30.82640619  
140.4344731  
140.4344731  
173.7966372  
31.65607212  
124.0155747  
99.50239282  
99.50239282  
56.87804745  
14.88808152  
14.88808152  
2025.161263  
2025.161263  
1218.192853  
20.2307561  
20.2307561  
138.9260306  
31.65018939  
895.0716318  
895.0716318  
456.1469752  
456.1469752  
395.0341671  
395.0341671  
61.0181313  
15.33511866  
178.159963  
178.159963  
71.81701205  
269.7653702  
14.76514756  
920.2218079  
920.2218079  
7.484038296  
72.03934907  
164.6570883  
50.71158966  
57.33478858  
21.66156658  
61.42222954

335.7673798  
170.9994246  
199.2059548  
101.2981839  
94.04472845  
94.04472845  
151.7389166  
151.7389166  
119.5572704  
4189.828735  
102.7587097  
102.7587097  
42.37641599  
384.6228929  
694.1694906  
199.0553671  
312.5162191  
312.5162191  
74.57862668  
74.57862668  
45.49979323  
2167.119765  
2167.119765  
1578.70425  
1578.70425  
230.6123378  
94.86645021  
36.49494376  
34.49416218  
34.49416218  
138.7504537  
79.20546855  
59.71995878  
16.07684535  
64.61765767  
8.899262052  
8.899262052  
304.3042311  
304.3042311  
1250.753257  
32.18104287  
93.64857439  
93.64857439  
0.419684965  
0.419684965

103.5992361  
77.28820168  
16.18419259  
1.081416584  
234.0730418  
32.52249259  
385.8860707  
385.8860707  
184.4058126  
89.21908045  
89.21908045  
13.33433708  
82.54087556  
82.54087556  
1000.214053  
1000.214053  
56.81570056  
139.7741996  
563.5336833  
563.5336833  
22.52240596  
148.447605  
29.67263708  
363.5554316  
1.657270411  
230.4926218  
273.0440614  
273.0440614  
43.31931189  
764.776671  
56.5930619  
56.5930619  
86.48627618  
96.4984299  
73.89748706  
86.89625715  
86.89625715  
16.7112248  
509.7534208  
5.805298437  
774.9034629  
774.9034629  
247.8844329  
11.75117901  
54.68962193

11.35884622  
11.35884622  
10.7497575  
10.7497575  
362.8345711  
308.0669656  
4.28272744  
62.62894317  
214.384603  
214.384603  
214.9690043  
214.9690043  
42.23583385  
42.23583385  
39.28627365  
107.3628755  
41.89232268  
174.2313056  
9.227186499  
34.99972493  
54.31906022  
188.7064898  
458.0666052  
15.62010421  
697.7699719  
697.7699719  
165.9773336  
38.88805813  
38.88805813  
137.4987398  
63.68889031  
63.68889031  
110.0603835  
24.33584523  
789.7062699  
789.7062699  
131.6234519  
571.010934  
123.506794  
54.36375893  
455.1644084  
130.8464288  
0.860839378  
115.7024738  
115.7024738

280.6025136  
107.316417  
81.62387364  
81.62387364  
5.250914058  
500.8727118  
500.8727118  
236.4076306  
236.4076306  
14.28487552  
296.782885  
296.782885  
146.3335935  
218.194701  
218.194701  
1.614331515  
140.7259446  
5.520312886  
0.419684965  
13.11758115  
24.22261526  
10.32036853  
360.5735414  
172.0281983  
305.6909461  
305.6909461  
228.7629989  
117.2873917  
124.3787955  
66.13052467  
78.80313013  
24.68730058  
71.77583297  
71.77583297  
22.79768751  
69.98180169  
527.4157373  
527.4157373  
3737.422062  
196.7681418  
196.7681418  
71.88906294  
35.30235866  
35.30235866  
129.0653196

129.0653196  
210.4671578  
210.4671578  
118.6832074  
60.9654884  
34.88061224  
34.88061224  
48.77315498  
48.77315498  
48.77315498  
48.77315498  
42.78227405  
124.1564585  
124.1564585  
89.82404627  
57.74652937  
62.86098419  
32.01899128  
32.01899128  
21.76509255  
315.6654404  
1709.780155  
152.1894733  
37.82428972  
37.82428972  
37.82428972  
5.498843438  
81.98297154  
221.6971874  
221.6971874  
128.658305  
128.658305  
211.1703702  
88.70969642  
88.70969642  
554.3382735  
75.93738627  
6.800837228  
6.800837228  
6.800837228  
45.27127185  
148.8046414  
27.53333481  
60.23170589  
843.2209549



843.2209549  
112.1538305  
26.18634067  
388.3553589  
139.7377467  
139.7377467  
79.81807692  
162.947175  
462.0719896  
462.0719896  
149.2010971  
149.2010971  
81.5165264  
8.629863224  
74.34246275  
16.60387755  
1.501101549  
0.419684965  
12.12792508  
27.56244681  
24.04879823  
82.23090092  
82.23090092  
83.97435075  
91.41957306  
36.09290697  
36.09290697  
14.43134039  
412.9794077  
125.186992  
194.0576619  
71.8620124  
71.8620124  
10.55064974  
64.15533544  
46.39768878  
123.0615166  
128.5312481  
531.4343953  
340.7389394  
377.1341784  
377.1341784  
137.5905003  
155.3272808  
377.5385283

377.5385283  
229.7556213  
229.7556213  
142.5661328  
114.6816442  
114.6816442  
25.71783409  
337.8178879  
337.8178879  
8.586924328  
658.7407283  
1536.718457  
296.7040464  
570.7253952  
570.7253952  
947.5590013  
148.0008695  
22.79768751  
13.49432722  
193.1180339  
193.1180339  
500.9435561  
37.18402755  
126.2943026  
1007.403956  
1007.403956  
49.94839353  
67.6242853  
204.078363  
178.7075597  
10.76152295  
35.39794045  
35.39794045  
311.4653727  
6.957006091  
175.4677345  
216.690683  
216.690683  
221.5430799  
221.5430799  
547.2636129  
67.38369684  
41.81614889  
22.9362082  
111.749129

214.5369506  
103.9239426  
68.17042387  
27.29304798  
322.1195484  
322.1195484  
498.5901127  
117.5470865  
1049.704953  
69.50565256  
765.7533551  
765.7533551  
4.46036575  
85.34633398  
25.84076805  
104.6983009  
3.997741889  
55.02725037  
353.4479977  
34.80443845  
34.80443845  
1.678739859  
144.3969186  
48.15260243  
12.49878842  
49.52076439  
175.7912344  
90.49020243  
43.44606712  
193.0612681  
129.0973979  
387.5759728  
257.103072  
50.13161293  
13.6660828  
83.64406322  
463.4307492  
76.06620295  
258.773566  
223.5012243  
124.5438135  
99.2541618  
541.4403647  
541.4403647  
326.2707945

95.04172543  
35.69851272  
390.7502331  
218.6705485  
122.2218451  
164.9908955  
50.38336358  
15.62010421  
15.62010421  
53.16705093  
615.9314037  
2.31900203  
656.1246737  
656.1246737  
143.667259  
4.589182439  
86.84361426  
46.97148115  
135.4276671  
881.6295959  
881.6295959  
2.098424824  
314.3605302  
26.67043398  
6.806719954  
187.6379952  
12.7799527  
12.7799527  
42.17730823  
376.738326  
343.8493446  
18.85464997  
10.17978639  
305.7447456  
305.7447456  
20.35369006  
20.35369006  
277.5417849  
660.5370727  
244.3122587  
285.956652  
285.956652  
209.910712  
209.910712  
697.2696386

697.2696386  
142.2752645  
118.6634978  
72.13317104  
72.13317104  
37.21902227  
8.672802121  
128.8103509  
124.4508464  
124.4508464  
39.56949938  
79.29898889  
452.8703455  
452.8703455  
13.36551053  
541.8636193  
428.2627883  
428.2627883  
220.4404955  
411.9392201  
411.9392201  
580.4837368  
279.6610759  
279.6610759  
8.733389192  
828.6381718  
828.6381718  
74.28247894  
333.9551471  
32.9871779  
538.2323162  
538.2323162  
310.1848484  
310.1848484  
83.86081915  
174.7610026  
51.66594938  
597.8351738  
338.8572205  
55.90573792  
55.90573792  
197.1057702  
279.7134172  
189.9093822  
768.7731564

768.7731564  
7.925192709  
107.1640694  
194.5835375  
85.58631918  
85.58631918  
16.07684535  
162.1728167  
410.60193  
410.60193  
37.00080815  
8.608393776  
36.899042  
162.9312867  
45.27891439  
990.6935856  
101.4155368  
18.61642459  
213.6825972  
90.33579339  
7.634324433  
214.9919319  
214.9919319  
2284.934189  
45.02540392  
498.6992197  
90.42579409  
90.42579409  
26.33868826  
136.7272978  
327.8854276  
327.8854276  
212.5894152  
413.5061882  
32.36250245  
1017.223136  
449.3217522  
78.80664977  
8.108713744  
33.17452021  
33.17452021  
107.0117218  
107.0117218  
1171.88426  
1863.461881

1863.461881  
571.8239066  
1.059947136  
8.914848775  
368.82867  
383.535292  
885.796177  
885.796177  
128.8471054  
4.880050715  
1379.071119  
89.62875979  
1107.338955  
576.2754233  
5.783828989  
1251.751712  
0.419684965  
20.22869465  
118.1908683  
137.8201782  
99.70119894  
809.672605

| <b>Bin</b> | <b>Average Fitness</b> |
|------------|------------------------|
| 1000       | 0.739698682            |
| 2000       | 1.109716066            |
| 3000       | 0.839723411            |
| 4000       | 0.919809415            |
| 5000       | 0.917997342            |
| 6000       | 0.998973559            |
| 7000       | 0.782151188            |
| 8000       | 0.874878161            |
| 9000       | 1.12041116             |
| 10000      | 0.938932328            |
| 11000      | 0.999704385            |
| 12000      | 1.059816567            |
| 13000      | 1.038195691            |
| 14000      | 0.816776126            |
| 15000      | 0.976599074            |
| 16000      | 1.166848452            |
| 17000      | 0.993998415            |
| 18000      | 1.010315187            |
| 19000      | 1.109850049            |
| 20000      | 1.072830592            |
| 21000      | 1.007050792            |
| 22000      | 0.96549063             |
| 23000      | 1.088897069            |
| 24000      | 1.148334795            |
| 25000      | 1.069268273            |
| 26000      | 1.057911496            |
| 27000      | 0.813587569            |
| 28000      | 1.10604555             |
| 29000      | 1.117685828            |
| 30000      | 0.963331183            |
| 31000      | 1.039964559            |
| 32000      | 1.105785572            |
| 33000      | 1.062344174            |
| 34000      | 1.078509407            |
| 35000      | 1.243854251            |
| 36000      | 1.014565891            |
| 37000      | 1.230604071            |
| 38000      | 1.089163296            |
| 39000      | 1.011423159            |
| 40000      | 1.016091647            |
| 41000      | 1.187322055            |



| Bin (kb) | Barcodes Sonication | Normalized Reads Figure 1 |
|----------|---------------------|---------------------------|
| 1        | 29310               | 86026.01627               |
| 2        | 18128               | 71308.25866               |
| 3        | 21991               | 115335.5082               |
| 4        | 25465               | 106920.7917               |
| 5        | 11450               | 58150.95717               |
| 6        | 12255               | 62694.25025               |
| 7        | 7704                | 38040.8841                |
| 8        | 8290                | 42505.06146               |
| 9        | 9027                | 25516.01232               |
| 10       | 13474               | 39330.17386               |
| 11       | 7427                | 30051.51163               |
| 12       | 6903                | 21554.80926               |
| 13       | 8957                | 20174.12311               |
| 14       | 3428                | 12540.68703               |
| 15       | 5350                | 15854.9311                |
| 16       | 9961                | 19348.04191               |
| 17       | 7270                | 18726.56129               |
| 18       | 9187                | 14714.22752               |
| 19       | 10852               | 17982.25636               |
| 20       | 11010               | 11813.66435               |
| 21       | 8207                | 11391.26831               |
| 22       | 9861                | 13610.42871               |
| 23       | 5509                | 10571.01715               |
| 24       | 3836                | 8983.115125               |
| 25       | 9131                | 8094.96812                |
| 26       | 6276                | 7327.558851               |
| 27       | 2780                | 4600.766635               |
| 28       | 3507                | 5987.869689               |
| 29       | 3776                | 2983.055165               |
| 30       | 3586                | 3766.831895               |
| 31       | 7212                | 6790.164095               |
| 32       | 4835                | 4903.040419               |
| 33       | 6035                | 7860.16235                |
| 34       | 4154                | 4866.526319               |
| 35       | 4743                | 7723.965656               |
| 36       | 6304                | 7964.359866               |
| 37       | 4586                | 6125.012449               |
| 38       | 3849                | 9275.134256               |
| 39       | 8801                | 12497.7785                |
| 40       | 9058                | 18318.04938               |
| 41       | 2383                | 7770.199585               |

| Spacer                | Location | PAM | Reads Sonication | Barcodes Sonication |
|-----------------------|----------|-----|------------------|---------------------|
| CGTTCCATTGAATACTGTGT  | 2368     | AGG | 15253            | 3594                |
| AAACATGTTGCGATGATGTC  | 2048     | AGG | 24648            | 4609                |
| CAATCCATTCATCTATTGCT  | 3503     | TGG | 22350            | 4201                |
| ATAAAAAAAGCTACTTGT    | 3239     | TGG | 20101            | 4663                |
| TCTGATGAATATTCATCTCT  | 1424     | CGG | 19122            | 3176                |
| AGCAATTCACACCCGCACAG  | 998      | TGG | 12651            | 3690                |
| AGTATGCTTACTTTTTCTTG  | 3823     | TGG | 44061            | 4852                |
| TGAAGCATAATACTGCTACT  | 3088     | AGG | 10205            | 2367                |
| TAGAGATATAGAACCTCACT  | 5384     | GGG | 9521             | 3021                |
| GCGCTTCAATAGTGATAGTA  | 4338     | GGG | 8628             | 1340                |
| TTTTAATAACCTCAACATCT  | 1070     | TGG | 16000            | 4491                |
| GTCAGTATGTACAGATTAAT  | 4241     | AGG | 35094            | 4111                |
| TTCAAAAGTTTAGTATCTAT  | 698      | AGG | 27625            | 5785                |
| GAGAACAACCATCCTACC    | 827      | CGG | 15152            | 3299                |
| ACTTTCCATTACTTAAATCA  | 9043     | TGG | 14293            | 3738                |
| GTAGAAGTACAGTATACAAC  | 2918     | TGG | 14650            | 2434                |
| GTGAATTGCTAGTAGTGTGT  | 1181     | TGG | 12033            | 3482                |
| TTGATTTCTGTCCTACTGTGC | 993      | GGG | 39319            | 6526                |
| TTAGAATTGACACCTCAAGA  | 873      | AGG | 13663            | 1490                |
| TGAAGAGAACACAGACGAAC  | 3540     | AGG | 13246            | 1840                |
| ACCAACTGGCACGGATCAAT  | 7611     | TGG | 4605             | 96                  |
| AGTAAGACGCCAAAAGTAAC  | 2465     | AGG | 14789            | 1240                |
| TGTCCTTTACCTGTTACTTT  | 2458     | TGG | 5366             | 966                 |
| ATATCTGAATTGTTATCAGT  | 3651     | TGG | 3615             | 1027                |
| ACTTATTCGTCGTTGCTAC   | 5238     | TGG | 7000             | 1291                |
| CTTTATCTAACATGATACAC  | 805      | GGG | 10637            | 2464                |
| ACACCTCAATATATACTTGC  | 15249    | TGG | 2594             | 305                 |
| AGAAAAACAACAACCTTAAT  | 2524     | AGG | 1163             | 335                 |
| AGCACTCCTAATCGTCATCT  | 5893     | TGG | 1969             | 702                 |
| AACACCTATTAACGTAGTAT  | 1449     | TGG | 6367             | 1370                |
| GATTCCAATACTACGTTAAT  | 1461     | AGG | 1836             | 366                 |
| ACGACATAAGCATGTTTAAT  | 3441     | TGG | 2678             | 502                 |
| GGAAGAATACACGATGTTGT  | 10947    | AGG | 7888             | 971                 |
| AAGAGAGTTATATAAAGCTT  | 1876     | TGG | 3140             | 30                  |
| ATTAGAGCCTCAATATGCTT  | 16315    | AGG | 4793             | 949                 |
| CACCTTAAAACGCTAAATCT  | 5152     | TGG | 1089             | 186                 |
| GGACAAAAATCAATCAATAG  | 7069     | TGG | 3099             | 474                 |
| ATACGTATGCACATTACACA  | 18135    | AGG | 7336             | 1474                |
| TTTGATACCAATGATCTTAT  | 4917     | TGG | 4582             | 256                 |
| TACTGATATTCAACTTCTGT  | 9289     | AGG | 5005             | 437                 |
| ACACAAATCCATCAATTGTT  | 2890     | TGG | 2691             | 53                  |
| TGTACACGAGCATAGCTACC  | 23485    | AGG | 293              | 35                  |
| ACTTTATCTAACATGATACA  | 804      | CGG | 4139             | 312                 |
| TCACTATAACAATTGCTTGT  | 12254    | TGG | 11418            | 1405                |

|                       |       |     |       |      |
|-----------------------|-------|-----|-------|------|
| ATTGAATTAGT TACTCGATT | 4866  | AGG | 3020  | 10   |
| CACAACGAGCAACATGCGAT  | 5751  | TGG | 3873  | 461  |
| TTAAAACCCCTAACCTTACT  | 6272  | AGG | 2057  | 145  |
| CCACACCCTTGCGTTTAATA  | 2334  | AGG | 2034  | 138  |
| GTTTAAGATATAGAATGCTT  | 10634 | TGG | 3633  | 714  |
| TCTTGCAAATCATATTTATA  | 4817  | CGG | 1474  | 3    |
| GACAGAAACTATTGAGTACG  | 3786  | AGG | 1901  | 181  |
| CATATTAGATCGAGTCAAGG  | 12415 | AGG | 8093  | 1988 |
| ACTCGACGACCAAGATGTTG  | 1077  | AGG | 2627  | 662  |
| TCTACTACGTCCGTAATGCT  | 4546  | AGG | 3169  | 568  |
| ATTAGACGAGTTAATTAAT   | 10351 | GGG | 525   | 43   |
| TCCAATTGATCCGTGCCAGT  | 7596  | TGG | 10099 | 2496 |
| TCAAAGTGATGTGTTAGCTA  | 4405  | GGG | 4079  | 598  |
| CCTATTACAGATTCATCGTC  | 11132 | TGG | 9938  | 1670 |
| GGATATCGAAAAAGAAGCGC  | 9340  | TGG | 11240 | 2529 |
| ATATTCATACCGTCATTCTT  | 6358  | TGG | 1286  | 218  |
| ATTGGAGCATGCAAATAACT  | 1407  | TGG | 1823  | 362  |
| AACAAAACGGTATAAACATC  | 2289  | GGG | 3102  | 279  |
| AAATAAAAAGATGCAACAAT  | 399   | GGG | 1571  | 156  |
| CTTAGACCAGAAACACTTTT  | 7552  | TGG | 2046  | 175  |
| TACAAGTGTACTTACAAGTA  | 1966  | CGG | 3614  | 319  |
| AAGTTACTACTCACACACTA  | 259   | AGG | 1973  | 187  |
| ATGTTGTTATCAAATATTTA  | 1713  | AGG | 667   | 175  |
| TGTACTTGTTTTTCATTTTG  | 7941  | TGG | 2203  | 265  |
| TTATCTAATTGTTTATCGAT  | 1389  | TGG | 2335  | 592  |
| CATTAACGAAGGTGGAACAA  | 3991  | CGG | 2258  | 445  |
| GTAGAATTTTCAGCATCTTT  | 2686  | CGG | 762   | 61   |
| GGTATGACTTTGGCCGAACT  | 479   | AGG | 1142  | 197  |
| ATATTAATCAGAGTGCCTGT  | 2982  | TGG | 6369  | 519  |
| GAAAAACAAAGATTTGTTTC  | 6141  | GGG | 2990  | 372  |
| AATAGAGCTAGGGAGTTTAA  | 3709  | CGG | 1745  | 394  |
| ATTAACGAATGAACTCAAT   | 18056 | AGG | 2709  | 412  |
| AGTTTTATAACGGCTCAGCA  | 4684  | GGG | 2120  | 494  |
| CAACCAGCACATTACACATA  | 9862  | CGG | 2256  | 411  |
| TGTTCCATGCTTTTTCAATT  | 2091  | TGG | 510   | 153  |
| CCATCCTACCCGGTAATAAA  | 837   | TGG | 1322  | 300  |
| CCATTTGTTATCTCCTTTC   | 6863  | TGG | 9569  | 1376 |
| TTGATACGATCCATCAACAT  | 8124  | TGG | 6029  | 1907 |
| CATTGGAAACGTTTAAGAAC  | 12011 | TGG | 5288  | 905  |
| TTTTACAAAAGCTTTACCAT  | 5991  | AGG | 1183  | 434  |
| AACTTATATCATTGTCATA   | 3618  | GGG | 501   | 119  |
| ACTCCTAATCGTCATCTTGG  | 5896  | CGG | 1449  | 80   |
| TATAATTCATTCATGTTATT  | 15351 | TGG | 1184  | 203  |
| TATTCATACCGTCATTCTTT  | 6359  | GGG | 1102  | 323  |
| ACACCAGAAAACACATATAG  | 2830  | AGG | 1270  | 287  |

|                       |       |     |       |      |
|-----------------------|-------|-----|-------|------|
| ATTCACCCACAACAATATAT  | 21829 | GGG | 2263  | 582  |
| CGGAAAGCCTCACGCAGACC  | 5642  | TGG | 3346  | 147  |
| TTTTGTATGCGTCAATGAGT  | 12308 | TGG | 5515  | 503  |
| TCTTTATACTCGTAACCATT  | 7797  | CGG | 2352  | 352  |
| ACATCATCGCCCTTTTTGTA  | 5003  | AGG | 1830  | 209  |
| CTTGATGTACTTCTTTGTGT  | 13373 | TGG | 7462  | 298  |
| TATCTTCCGTGCCATCTTCT  | 8632  | CGG | 5202  | 1495 |
| TCTTTTCTGCTAATTCATCA  | 14170 | CGG | 2818  | 569  |
| TCTGATTAATATTTCTAAAT  | 3009  | TGG | 346   | 95   |
| CAAAAGCAGTCAAAGCTAAA  | 8093  | GGG | 842   | 180  |
| TATTGGTAAGTTTTGTCACT  | 4934  | TGG | 862   | 192  |
| AATGAAGTTTATTCGCTCAC  | 8700  | AGG | 6126  | 1583 |
| TAAATATTGCAAGGTTTATA  | 8038  | CGG | 1717  | 273  |
| GAATGATAACGATCTAATTC  | 19068 | AGG | 10415 | 2541 |
| GTCAAGATGTATTACGAAAT  | 3328  | AGG | 1408  | 37   |
| TTTGTTTCGGCGAACTTCAAA | 2724  | AGG | 762   | 101  |
| TACATTGATTATTCACCAAC  | 2983  | AGG | 7224  | 1549 |
| GCTAAGTATTTAAGACATGC  | 38827 | AGG | 11424 | 2724 |
| TAGTGGCGTTCAAGAACTTA  | 7086  | TGG | 804   | 102  |
| CGTCAATATATGCTTTCCGT  | 14619 | TGG | 7213  | 731  |
| TTATTTGCTAATAGTTTGTT  | 2738  | CGG | 822   | 63   |
| AAGATTTAATAGATCTTAGC  | 24027 | AGG | 7606  | 775  |
| GAATTAGCTATCATAACTTC  | 1365  | TGG | 2927  | 696  |
| TAACTTATATCATTTCGTCAT | 3617  | AGG | 521   | 84   |
| AAATTCCACTTTGTTATTAC  | 4283  | AGG | 4411  | 734  |
| CTTTATACTCGTAACCATTTC | 7796  | GGG | 3693  | 641  |
| GGATCTAAGTCAGTTTCAGC  | 22166 | TGG | 9203  | 169  |
| TAACTTAGTCATGAAATGGT  | 3573  | AGG | 1424  | 164  |
| CTATATGTGTTTTCTGGTGT  | 2811  | TGG | 417   | 87   |
| AAGAAAGTTTTAACTTAAGG  | 930   | AGG | 540   | 114  |
| AATAAGGAGTTAACTCGTAT  | 17877 | AGG | 3159  | 491  |
| ATTTAAGTGCTAAAGCTAAA  | 6971  | GGG | 657   | 252  |
| GGTATGAATAGAATGACGTT  | 14900 | AGG | 2051  | 326  |
| ACTAAGACATCAATTTTAGT  | 2246  | TGG | 912   | 66   |
| GTAGAGATATAGAACTTCAC  | 5383  | TGG | 1818  | 239  |
| TGAATCAATCACACTTATTG  | 12809 | AGG | 1560  | 183  |
| AAGATTTAAATGTAGATAAC  | 39754 | AGG | 1513  | 520  |
| AGCAATCCATTTGAAAGCAG  | 5127  | TGG | 1113  | 359  |
| AATACCACTTGCATGACTCG  | 5794  | TGG | 1778  | 442  |
| AATCACGGAGCAAAGCGTAC  | 15147 | AGG | 4519  | 1056 |
| AAATAACTTTATCCACATAA  | 6704  | AGG | 1548  | 207  |
| AAAATAATAGCATCATCTA   | 6502  | TGG | 1714  | 248  |
| CATGCCTACACAGTATTCAA  | 2380  | TGG | 1912  | 513  |
| AACAGCTGAATGGTTAAACA  | 7515  | CGG | 959   | 245  |
| AAAAAGAAAAGTGAAATGGT  | 9072  | TGG | 1011  | 283  |

|                       |       |     |       |      |
|-----------------------|-------|-----|-------|------|
| TGCGCTTCAATAGTGATAGT  | 4339  | AGG | 576   | 96   |
| CTCAAAGTGATGTGTTAGCT  | 4404  | AGG | 1288  | 202  |
| CCACAATTAGCATTTGCAAT  | 9934  | AGG | 2063  | 320  |
| TATATGACGCAAGCTCGTCC  | 30146 | AGG | 13111 | 2801 |
| AATCCTTTTTTCGACATGAGT | 7713  | AGG | 1531  | 108  |
| AAAAATCCACCAGTGCCAGC  | 39334 | AGG | 5796  | 1603 |
| TTCTATACTTCACTACAGCA  | 3154  | TGG | 2928  | 630  |
| TGAATTTTACAGTCCTATGA  | 13169 | TGG | 1650  | 218  |
| AGCTAGGGAGTTTAACGGTA  | 3714  | TGG | 644   | 102  |
| ATTTTCAGCATCTTTCGGTA  | 2681  | TGG | 2917  | 624  |
| TCTAAAAAACCTAAGTCAAC  | 21416 | AGG | 11534 | 2703 |
| GTAGTAGAAGCAATTAGAAA  | 4577  | TGG | 606   | 127  |
| CGACTTAAGCAGGTGCCATA  | 21278 | TGG | 4315  | 501  |
| TGCTTATCTGTCTTCGGAAT  | 5036  | AGG | 1094  | 275  |
| ATTTCTAATTTCCATCTGC   | 24053 | TGG | 14049 | 3496 |
| CTCAACTTTGCGAAGTCACT  | 13745 | CGG | 1663  | 36   |
| GGTTCTTGTAATTATTTTC   | 6619  | AGG | 1085  | 197  |
| ACTCATCGTTTGAATCGTCT  | 32540 | GGG | 4387  | 30   |
| CTTTGAATGGTTTAATACAT  | 11994 | TGG | 1300  | 527  |
| GCTGTAGTGAAGTATAGAAA  | 3134  | CGG | 366   | 36   |
| GTTTGAAGATGAAGAAACGT  | 18313 | TGG | 2545  | 680  |
| TCAGCTAAGCGCATGCCATA  | 9571  | AGG | 1197  | 327  |
| CGGATTCCTTATTAACGCA   | 2344  | AGG | 987   | 285  |
| GGATTCCTTATTAACGCAA   | 2345  | GGG | 1712  | 340  |
| AAATCTTCTTTTTCTTCAAT  | 16429 | TGG | 1807  | 109  |
| CTTGGTCGTCATATCCAAAT  | 5134  | TGG | 326   | 45   |
| AGATACCAGAAAGATAACGA  | 5214  | CGG | 1016  | 155  |
| GCACGTTGCATAATCATTTTC | 2116  | TGG | 929   | 129  |
| AAAAATAATCATGCGAGTTG  | 9227  | AGG | 2969  | 850  |
| TTTATTAACCTTACAAAAA   | 5010  | GGG | 630   | 210  |
| ATATCTATTGATGTTGTAAA  | 11190 | TGG | 1300  | 394  |
| CCATTTATTACCGGGTAGGA  | 821   | TGG | 1001  | 324  |
| ATTGGTCGACGTTTGAATAT  | 16411 | TGG | 3455  | 45   |
| GCGTTTGATGAAATACTTGA  | 11745 | GGG | 1479  | 196  |
| CTAAAGTCATATATACTACG  | 39928 | GGG | 851   | 110  |
| ATTCAACATTCAAGTTAAAGA | 11781 | AGG | 1232  | 7    |
| TAGGAGTGAAGTATATAGCC  | 40022 | GGG | 3004  | 417  |
| TCCTCATGACCATTCTTTAA  | 9969  | CGG | 1410  | 172  |
| AGATTTTATTGAACAAGTAA  | 9900  | CGG | 1729  | 44   |
| GTTAAAATTAATACTATTTTC | 12660 | AGG | 2365  | 96   |
| AATAAGCGCCATTCACTACA  | 10138 | TGG | 1863  | 253  |
| TTTATCTCTTGTAGCAAACG  | 3935  | TGG | 780   | 238  |
| CTCTATTATCTCTTCGTACA  | 18682 | AGG | 4035  | 1119 |
| TTGTTATCAAATATTTAAGG  | 1710  | TGG | 490   | 149  |
| TGTTGTATCTGATTCACACA  | 22667 | CGG | 5213  | 315  |

|                        |       |     |       |      |
|------------------------|-------|-----|-------|------|
| AGTATAAAAGAATGTTTATA   | 10613 | TGG | 341   | 78   |
| CTAATACATGTTTGTATAG    | 5695  | TGG | 1294  | 215  |
| TTTAGTTTTTAAAAATTCTT   | 8442  | TGG | 281   | 50   |
| AACCACAATCCTAAATTAAT   | 40187 | AGG | 134   | 43   |
| ATCTTTAATGCGATGTCAGC   | 24590 | AGG | 9396  | 2053 |
| TACCCATACCGCGTAACACA   | 17082 | AGG | 3620  | 429  |
| TAATTAAGTCTAGTCATGAAA  | 3569  | TGG | 716   | 44   |
| AACGCCCTGCTACTAATCAC   | 2629  | AGG | 1550  | 260  |
| AAGAGAACGCAACAAAGAGC   | 11476 | TGG | 5774  | 1036 |
| CGCAAAAATATTCATGTAA    | 3361  | CGG | 1211  | 250  |
| AATGATTCTGACATTGCATT   | 22286 | GGG | 1660  | 57   |
| CATATTCTTCAAAGGCCTTT   | 14775 | TGG | 1709  | 83   |
| TTGGTCGTCGAGTTGTAGCT   | 1051  | CGG | 123   | 9    |
| TTTTTTACCTCAAATTTTAC   | 4075  | AGG | 1888  | 288  |
| GCAAAGAACGTGAAATAGCT   | 9651  | AGG | 809   | 77   |
| ATAAAAGTAAATGTTGATAC   | 18643 | TGG | 7653  | 1857 |
| AGAAATGTTAAAAAGTGTAT   | 39712 | AGG | 814   | 48   |
| TTCATTTTAAAAGGTCATAT   | 3400  | GGG | 304   | 113  |
| GAGTCTAAATTTAAATCGAG   | 19408 | TGG | 1819  | 286  |
| AAAATATCTCTCCTTCTTG    | 869   | AGG | 767   | 113  |
| GTTTACCCATATATTGTTGT   | 21840 | GGG | 2751  | 671  |
| GAAATCCTATGCAAGGCAGT   | 331   | AGG | 766   | 265  |
| ATTTGCAAATCCTAGCATTAA  | 4552  | CGG | 1924  | 492  |
| ATTTGAATCATCACATTTAT   | 11324 | TGG | 791   | 154  |
| GATTACTTACGTAATGCGAA   | 676   | AGG | 1837  | 298  |
| TGCCAAGGAAATCCTATGCA   | 338   | AGG | 1270  | 7    |
| TTACGTGCTCTCATTACAGT   | 18512 | TGG | 7613  | 2094 |
| AGAAACATCAATCACACATT   | 2425  | CGG | 441   | 119  |
| AAGAGGTATTTAAATATGTT   | 16156 | TGG | 2148  | 378  |
| TTTAGTTGTTTACAGATGTAGT | 21085 | AGG | 2423  | 649  |
| AAGATTGAACAAATAGATAA   | 14978 | AGG | 555   | 6    |
| TAACCGTATCGATTAAGATA   | 40130 | CGG | 545   | 137  |
| TTTATATTCACAACCTTGCCA  | 353   | AGG | 1327  | 133  |
| GGAAAAAAGGAGCAAACAAA   | 37855 | TGG | 977   | 52   |
| CATATCGTACCAGATTGGCA   | 10188 | AGG | 3996  | 264  |
| AACAACAACGAAATATATGC   | 11088 | GGG | 2211  | 68   |
| AATCTCCGTTTAGTTAATAC   | 5967  | AGG | 2037  | 526  |
| AAAGCAATTATGAAAAGAGT   | 194   | AGG | 260   | 49   |
| CGTCTATCTGTCTTTCCCTC   | 34085 | TGG | 2944  | 505  |
| GGTTTGTAGTTATATAAAT    | 3630  | TGG | 326   | 85   |
| ATTTAAGGTGGTTATTCTTA   | 1698  | TGG | 685   | 68   |
| AGCATTGTTGATAACAGAGT   | 8290  | AGG | 894   | 180  |
| AAACAATAAACTTTTATGG    | 11602 | AGG | 894   | 1    |
| AGTGTATAACCTGCTGGCAC   | 39327 | TGG | 14730 | 1785 |
| TACACACGATCAATCACAAA   | 32947 | CGG | 1105  | 25   |

|                       |               |       |     |      |      |
|-----------------------|---------------|-------|-----|------|------|
| CCGATTA               | ACTGCATAATAGT | 25138 | AGG | 1258 | 190  |
| GTAAGAT               | GACAGCTATGTTG | 17376 | AGG | 3091 | 126  |
| TTTAACCTAATAAAAATACAT |               | 38598 | TGG | 494  | 64   |
| TACACACATAAGTTTATTGG  |               | 234   | CGG | 811  | 47   |
| ATCATCAACACTATTTCTAA  |               | 16631 | TGG | 1060 | 128  |
| AGTTCACTATGAAAACACTAG |               | 10991 | CGG | 1028 | 137  |
| CGATAGAATCGGAAACCCTT  |               | 34564 | AGG | 811  | 78   |
| GTTTTAAACCCAAAGAATGA  |               | 6351  | CGG | 1116 | 232  |
| GACCATTATTTGATGCTAAC  |               | 20142 | GGG | 4151 | 922  |
| CAAATACAAGCGTTAATACG  |               | 35255 | TGG | 654  | 107  |
| AAAGCATAAAAAATGGTATT  |               | 3048  | AGG | 308  | 73   |
| AGGAATCATGAAAGACAAGA  |               | 12358 | TGG | 603  | 194  |
| AATACAAAATCTACGGCACA  |               | 32585 | TGG | 3564 | 475  |
| TTTACTTGTACTAGATGATA  |               | 8229  | TGG | 844  | 209  |
| ACGTCATCAAATTCTTTTAT  |               | 16181 | AGG | 313  | 97   |
| ACCAACCGAAATGCCATTTT  |               | 7188  | CGG | 247  | 42   |
| TTTACGCGCGTTATCTGTCA  |               | 10047 | TGG | 1528 | 188  |
| TTTATCTTTTCGCTGAATAG  |               | 7668  | TGG | 618  | 227  |
| TAAATACAACAGGCTCAATA  |               | 17861 | AGG | 1013 | 183  |
| TTTTCTAATTGTTCTCGAGT  |               | 22997 | TGG | 3987 | 892  |
| AATTGGCCACTGCTTTCAAA  |               | 5117  | TGG | 1192 | 308  |
| TATTACCGCAAAGATAATTT  |               | 2947  | AGG | 218  | 10   |
| TCTCCCAATCATTAAACGT   |               | 4186  | TGG | 637  | 48   |
| CCTATTGCAAATGCTAATTG  |               | 9918  | TGG | 578  | 60   |
| TTGAGTATTGCGAATCAAGT  |               | 12100 | AGG | 1036 | 258  |
| ATTTAAAGTCAAGAAGTATG  |               | 20839 | GGG | 913  | 339  |
| GTTCTGAAACTTGTCCTTC   |               | 17520 | AGG | 3290 | 528  |
| GTGAAACACGCTGTACAAAC  |               | 22371 | AGG | 4179 | 558  |
| ACGCAATTTTTCGTACCTTC  |               | 14720 | CGG | 5133 | 828  |
| TGCTAAAGTCATATATACTA  |               | 39930 | CGG | 569  | 142  |
| GAACCACAATTTTCTCTTCT  |               | 6585  | AGG | 396  | 11   |
| CGATTGTACTTGCTTGATGT  |               | 36132 | TGG | 6269 | 686  |
| ATTAAGTACCTTGTTCTGC   |               | 19588 | TGG | 8417 | 1830 |
| ATTCTCATTCAAATCAAAGT  |               | 15738 | CGG | 2249 | 182  |
| TTTGCAGTATACGGAAAAAT  |               | 3917  | TGG | 312  | 80   |
| TTTAAACGACGTATCGATAT  |               | 30713 | TGG | 1349 | 404  |
| TTTTTTGATGTCTATTACCC  |               | 6033  | AGG | 1119 | 185  |
| TATCGCTATTGCGTTAGATT  |               | 6829  | GGG | 775  | 96   |
| ACAAGTACGGTTGTTAATAA  |               | 1979  | CGG | 682  | 74   |
| CTGAATTCAATAAATACAAC  |               | 17851 | AGG | 2271 | 339  |
| ATTTAATGATTCTGCAGCTG  |               | 308   | AGG | 787  | 35   |
| AGGGTTTTCGAAACTAATTT  |               | 37660 | AGG | 259  | 15   |
| ATATATAAAGCAACATGGTT  |               | 10250 | TGG | 554  | 70   |
| GATACAAAGACTTACTTTAT  |               | 10714 | AGG | 1435 | 113  |
| TATTTAATTATGAAAATCAC  |               | 4626  | AGG | 1391 | 292  |

|                       |           |      |     |
|-----------------------|-----------|------|-----|
| CCATTCGGGTGTTTTTTAGT  | 7782 AGG  | 851  | 133 |
| GTTCCAAACTGCAAGCATAG  | 10866 AGG | 209  | 52  |
| GTTTACCATCATAACAAGGAT | 40369 GGG | 1105 | 142 |
| TATATTTGATTTGTAAGTTC  | 21725 AGG | 3691 | 678 |
| ATCAGAATTTTAAATCAAGT  | 18403 GGG | 220  | 58  |
| AACTAAATCAAATATGAAC   | 8351 TGG  | 1639 | 197 |
| ACTATTTCTAATGGCAAAGT  | 16622 TGG | 2796 | 790 |
| GTGACATGCTTGGGTGAACA  | 39861 AGG | 468  | 145 |
| GATGGACGACAACCTTTTTGT | 27154 AGG | 1776 | 323 |
| AATTAGAAATGTAAATGTAG  | 9415 AGG  | 1003 | 163 |
| TCAATACCTTTACCTAAAAT  | 6805 AGG  | 677  | 145 |
| GAAACGTTGAGGCACCTAT   | 8877 GGG  | 545  | 63  |
| CCAAATCGTATCAAGTACAT  | 25934 TGG | 2341 | 603 |
| TACGAGTGAACCTAAATATC  | 17454 AGG | 1932 | 559 |
| TTCGTCATTGACATTAACGA  | 3980 AGG  | 1172 | 300 |
| CGCTAACATAAAGAACATAT  | 38272 TGG | 634  | 250 |
| TCCTAAAATCCCTTTAAGCA  | 34242 TGG | 2517 | 474 |
| GAAAAACAATAACAGAAGCT  | 25587 TGG | 1281 | 504 |
| TCATTCTGATTGGTTATTTT  | 17669 GGG | 788  | 162 |
| GTTGATTTTCGTGCCACTGTG | 994 CGG   | 276  | 126 |
| TAAAAGAATAGCATCATTTG  | 6438 GGG  | 505  | 58  |
| CCTATCATCTCTTTGTTGTT  | 16969 AGG | 621  | 42  |
| TTATCATGATGTTACAAAAG  | 637 AGG   | 445  | 118 |
| AACTTTGAAGCTTCTAGAGC  | 6577 AGG  | 891  | 88  |
| AATACCATTTATTACCGGGT  | 825 AGG   | 788  | 235 |
| ATTAACAATAAAAACCTTTTA | 11599 TGG | 138  | 47  |
| AAGATATAGAATGCTTTGGT  | 10630 AGG | 987  | 210 |
| ATTTCTGCTTGTGCATATTC  | 19753 AGG | 5731 | 549 |
| GTATGCTCAGATGTTAAAAG  | 14021 AGG | 300  | 49  |
| TCTTTTCGATTCGATCTAAA  | 17217 TGG | 809  | 200 |
| TAAGAATGACATTGAAATAG  | 14833 AGG | 305  | 48  |
| CTGGCACATTATGAAGCAGT  | 5661 CGG  | 510  | 161 |
| AACATTCACGTGATCCGTAC  | 9735 TGG  | 2762 | 448 |
| TAAATTTAACGAAACGTTTCG | 8867 AGG  | 536  | 78  |
| TATGAAAAAGATGATGATAA  | 16832 TGG | 1392 | 312 |
| TCCGATAAAATAACATTGCC  | 19546 TGG | 4144 | 563 |
| CTGTTCTATGAAAGTTGCAA  | 5489 GGG  | 802  | 18  |
| CTTAATATTCGACGATAGCG  | 8572 GGG  | 182  | 88  |
| TGGAAATTCAATGAAGATGA  | 4965 AGG  | 614  | 154 |
| AAAAACCAACGTTTAATGAT  | 4197 TGG  | 962  | 236 |
| GTTCAATATAAAAACGAAAAA | 3300 CGG  | 11   | 1   |
| GATTCTTCTAACTTATTAAC  | 17482 TGG | 3875 | 821 |
| TCCTTTCACCTATAATCACT  | 26829 TGG | 1275 | 241 |
| AGATGAAAAAACGACTATAA  | 165 AGG   | 671  | 170 |
| CTTAATGTGTTTCATAGATTC | 37069 AGG | 2230 | 506 |



|                       |       |     |      |     |
|-----------------------|-------|-----|------|-----|
| ACATCTGTTTCAATTTTCGTT | 23689 | TGG | 864  | 165 |
| GCTAAAGTCATATATACTAC  | 39929 | GGG | 1596 | 372 |
| AGCTAGTTATTTCTGTAATT  | 9166  | TGG | 488  | 81  |
| AAGTAGCGCAATGAGTATGT  | 16792 | AGG | 2915 | 288 |
| TTTTGATGTCTATTACCCAG  | 6035  | GGG | 503  | 56  |
| CAGTTGTGACGTGGAAGGTT  | 2598  | TGG | 213  | 2   |
| AATTTAAAGTCAAGAAGTAT  | 20838 | GGG | 1012 | 276 |
| AATCATCAATAAACTTAAAT  | 15904 | TGG | 491  | 152 |
| AAGTACCGTCGTTATCTTTC  | 5203  | TGG | 318  | 14  |
| ACTACAGTACCGTTTTTACC  | 36838 | GGG | 3302 | 571 |
| GGATTACCACTATCTTATAC  | 20177 | TGG | 4014 | 709 |
| ATAATACTGCTCGTGCAACA  | 32531 | TGG | 3010 | 925 |
| TCATCCAAATTGAAAAAGCA  | 2103  | TGG | 477  | 9   |
| CATGACCTGTAATAACAAAG  | 4272  | TGG | 496  | 138 |
| GCATATAAATTACTTCGGTAT | 35948 | TGG | 3489 | 611 |
| CTATCTCGTAAGTTCAGCGT  | 11931 | TGG | 1924 | 251 |
| AAGAATTATCTTAAGACGTG  | 14305 | GGG | 508  | 61  |
| TGCTATGCATGCTGTAAAAG  | 5932  | TGG | 483  | 110 |
| TGCTTGTAACGTCGTTAACG  | 20288 | TGG | 235  | 31  |
| AAGATTTTATTAAGCAAGA   | 7445  | TGG | 184  | 30  |
| GACTCTTATTACAGTCTTGT  | 20536 | CGG | 2819 | 625 |
| TGTTACCCAAGCATGTCAC   | 39880 | TGG | 1573 | 137 |
| GATCTTATACGAAGTAAAGA  | 13617 | AGG | 369  | 78  |
| GATTGGGATTACGCACGTTA  | 20243 | CGG | 3654 | 776 |
| GAAAACCTGTGATTAGTAGC  | 2640  | AGG | 746  | 221 |
| AATTTTCTAGTTGATTCTAC  | 5396  | TGG | 1728 | 242 |
| CCACAAATAGAAATAGAGCT  | 3698  | AGG | 418  | 66  |
| CGGACAAGGCAAAGCATTTCG | 35827 | CGG | 1225 | 263 |
| GCAAAGATCATTAAACAAAA  | 2276  | CGG | 87   | 5   |
| TTTGACCAAGCTGTTATCTT  | 19907 | TGG | 734  | 174 |
| CAAACGTCATTGCATAATCA  | 35970 | GGG | 2195 | 317 |
| AACAACCCTCCTCATCACAA  | 2575  | TGG | 1373 | 79  |
| CTGAGAATTTTATTACATGA  | 12851 | CGG | 1807 | 375 |
| ATCCTTGATGATGGTAAAC   | 40350 | CGG | 1071 | 383 |
| TGTGGTACATTAACAAATG   | 9694  | TGG | 227  | 40  |
| TTTTATATGAGCAAGAGCTA  | 8794  | GGG | 834  | 157 |
| TTTGTGTCGTTTCATATTCGT | 38125 | AGG | 1260 | 379 |
| TCAATTAGTTTGTCCGCTA   | 5991  | TGG | 565  | 179 |
| GCATACACATAAGTTTAT    | 237   | TGG | 3236 | 757 |
| GTTTTAGAGAATGTTTCTAC  | 6754  | AGG | 2658 | 481 |
| GTTCAAATAATGATACTGGT  | 20325 | TGG | 2726 | 487 |
| TGAACCTAATAAAAGTTATC  | 37605 | AGG | 1631 | 295 |
| AAAAGCAGAAGTAGAGGTTTC | 5312  | CGG | 277  | 80  |
| CCAAAATCATTAAATATTGCA | 8029  | AGG | 558  | 68  |
| TATTGTCATCGAGCTTAAAT  | 15604 | TGG | 780  | 219 |

|                       |       |     |      |      |
|-----------------------|-------|-----|------|------|
| TAACCGTATCTTAATCGATA  | 40143 | CGG | 452  | 110  |
| AGAAAACTTGTGTACTAAA   | 93    | AGG | 446  | 46   |
| TAGATAACAGGCAGGTA     | 39766 | CGG | 702  | 141  |
| TTGACACAACACAAACATCA  | 27197 | GGG | 1187 | 157  |
| TACACAAAATACAAAATCTA  | 32578 | CGG | 440  | 3    |
| TTTAAAAGAATAGCATCATT  | 6436  | TGG | 300  | 80   |
| CAAGATGGAATCAAGATTTT  | 7460  | AGG | 194  | 66   |
| CAGTTTTAATACCGTATTCG  | 10810 | TGG | 407  | 34   |
| CGCTCTTATCAGACGTAGTA  | 20564 | CGG | 2788 | 512  |
| TATAAGTAATATTTTTCTTT  | 8609  | CGG | 131  | 44   |
| GTAAGCGTTAGTGGCATT    | 25184 | TGG | 1179 | 239  |
| CATATAAATAAAGGCTCATA  | 17962 | AGG | 773  | 270  |
| AAGAAATCGTTAGCACTAAT  | 20219 | GGG | 1489 | 294  |
| TTCTTAAGTTGTCTTTCAGT  | 30454 | GGG | 1695 | 213  |
| AATTTAAGTGCTAAAGCTAA  | 6970  | AGG | 1049 | 330  |
| AATAAATTGTTTTAGCTAT   | 21163 | TGG | 771  | 150  |
| AACCCTCTATCAACATAGCT  | 390   | TGG | 247  | 101  |
| CAAGATGGAACAGCAGACGC  | 12373 | AGG | 2463 | 567  |
| TCATACTCTAGTAATTCGTC  | 9367  | TGG | 1866 | 170  |
| GTCGAACACTTATTTGTATT  | 10435 | TGG | 1022 | 183  |
| CTTTGTTGGTTTGATGCATT  | 33521 | CGG | 2034 | 453  |
| GTATAACGGCAATGACACAG  | 11681 | AGG | 1245 | 65   |
| TTGCAAATGTGAAATCTATG  | 7839  | AGG | 643  | 156  |
| GTTAAAAGAATGTTAAAGTC  | 6108  | AGG | 920  | 316  |
| TCGCCGTATGTGTAATGTGC  | 9849  | TGG | 5909 | 736  |
| ACGTAATATCAACGGTATGT  | 15707 | GGG | 2516 | 807  |
| CTATCCGGATATTTATTTTT  | 37527 | AGG | 745  | 6    |
| TTTGTCTATCCAGTGCTTGC  | 35592 | TGG | 9798 | 1420 |
| AATTATTCAATGGTCAATGT  | 37782 | CGG | 1221 | 169  |
| CTCATCTCTGTAAAATTTG   | 4066  | AGG | 219  | 58   |
| CGATAGTAGACGCAATTAAT  | 31775 | GGG | 639  | 47   |
| GCCAACAAAATAACATTAT   | 16754 | AGG | 908  | 163  |
| GAACCTGTATCAGTACTACT  | 34831 | AGG | 1128 | 254  |
| TCCGTTTTATCAGTGCCTAT  | 29215 | CGG | 1654 | 184  |
| ATGCCTAGTTTAATTGATAC  | 13233 | TGG | 2899 | 766  |
| TTTTGTTCTTCTGATTGCTC  | 19161 | AGG | 4972 | 1394 |
| TGATGAATTAGCTGACATGT  | 12069 | TGG | 2452 | 558  |
| ACATCAATCACACATTCGGA  | 2429  | CGG | 493  | 156  |
| TCATGTTCCGGTAAATTTATA | 9457  | TGG | 448  | 116  |
| TCTAGAGCACCGTTAAAGAA  | 9976  | TGG | 384  | 21   |
| GCCTAAAAATCTATCAACTA  | 19294 | AGG | 713  | 93   |
| TCATACCATCTAACTAGCG   | 14868 | AGG | 342  | 32   |
| AATTTTTCGTATTCAACTGT  | 22586 | AGG | 2927 | 352  |
| CAATATAAACGAAAAACGG   | 3303  | AGG | 786  | 60   |
| ACCGCTCTATATTTAACGGC  | 6388  | AGG | 1311 | 96   |

|                       |           |      |      |
|-----------------------|-----------|------|------|
| GGATTGAAATGTGAGAGATG  | 7747 TGG  | 361  | 96   |
| TTCCCTCACACTATTTCTAT  | 20996 TGG | 829  | 146  |
| GCTTTAATTCAGTTGCTTAC  | 25886 TGG | 7230 | 1240 |
| GTGCTTTCACAAGTATTTCT  | 25485 TGG | 850  | 28   |
| TATAGTTGGGATCAATGTTG  | 13006 AGG | 726  | 179  |
| TCATAACTTTCAACGCTACC  | 32832 TGG | 7146 | 1438 |
| CGCTATTAATGTTAGTACAA  | 27769 AGG | 1102 | 80   |
| ATGTATCAAGATACTGCATA  | 38893 CGG | 549  | 76   |
| CCATTCATGTTCTGCGGTT   | 33943 TGG | 1599 | 186  |
| AAAAAGAAAGTTTTAACTTA  | 927 AGG   | 84   | 20   |
| ATAACAAAAAAGTACCCGA   | 39803 AGG | 838  | 140  |
| TCACGATGTTTTGTAGTGT   | 18080 TGG | 3233 | 728  |
| GAAGTACGACGAAAGTTATT  | 7641 GGG  | 333  | 19   |
| CCTGTCCAAATTTTAACCGT  | 37312 CGG | 893  | 125  |
| CGACACAAATGATTTAGGGT  | 38155 AGG | 598  | 197  |
| GCATAAAAAATGGTATTAGG  | 3051 AGG  | 233  | 43   |
| AAACAATCAAGAGAAAAACA  | 500 AGG   | 366  | 95   |
| TTAAATGTAGATAACAGGC   | 39758 AGG | 523  | 73   |
| GCGAGAAAAGTAAGAGTAAT  | 8404 CGG  | 485  | 49   |
| CCAGAAAGGAGATAACGAAA  | 6879 TGG  | 273  | 37   |
| TCAAAGTTTACAGTCGTTG   | 12525 AGG | 1023 | 300  |
| TCTTCAACAACCAATGCTC   | 15539 GGG | 1578 | 363  |
| TAAAACCGCTCTATATTTAA  | 6384 CGG  | 447  | 18   |
| AGAAAAACAAGGTATGACTT  | 489 TGG   | 402  | 74   |
| GAATGACGGTATGAATATAT  | 6337 CGG  | 455  | 173  |
| GCAACGTGATGAGCTTATTG  | 11440 GGG | 894  | 203  |
| TTCGACCATGATTTAAGTAA  | 9032 TGG  | 791  | 138  |
| CGCTGATAAAAGTAACTAT   | 16058 CGG | 426  | 37   |
| GTTTCAGAACGAACAAGGTT  | 17549 AGG | 697  | 123  |
| TATTAGTAGTACGCCCTTTT  | 7244 CGG  | 98   | 8    |
| AAATTACCTGACATAGATGA  | 17645 AGG | 1887 | 405  |
| GAAAATACAGATCCTAAAGC  | 15585 AGG | 3416 | 798  |
| TTCATACTACGCCAAATATT  | 35320 AGG | 838  | 313  |
| CCGAAAGCGTTTACAGATGC  | 31061 AGG | 4090 | 716  |
| CTAATCGTTACATTCACAAT  | 26638 AGG | 1588 | 505  |
| TTATTTTACAGTGTACTTTTT | 13048 GGG | 1946 | 99   |
| AATAACAATACTAATAATGA  | 7312 TGG  | 660  | 61   |
| GGTAAACATCACGGAATGTT  | 22440 TGG | 1310 | 298  |
| ACATTTTACAACACTAATC   | 27367 AGG | 2808 | 197  |
| CGTTCATAGAACATACCTGA  | 15671 TGG | 2748 | 425  |
| TAATTAAGGGGTGATTTTTA  | 37404 TGG | 462  | 100  |
| CCAAAAAAGTGTGATCA     | 40303 AGG | 348  | 43   |
| TAGCGTCCATTACACCTAGT  | 11361 TGG | 1180 | 150  |
| TTATCGAGTGTATAACCTGC  | 39333 TGG | 3072 | 520  |
| TAATTATTTCAACAAATGAA  | 6470 TGG  | 304  | 100  |

|                      |       |     |      |      |
|----------------------|-------|-----|------|------|
| ATAACTAGCTCAAAGCGTTA | 9195  | TGG | 1126 | 207  |
| ACTCACGATAAGTCATGAAT | 18559 | GGG | 672  | 80   |
| AGATGAGAATGACTTAGATA | 3480  | TGG | 1241 | 270  |
| TATTACTTATACCGAGAAGA | 8637  | TGG | 484  | 106  |
| ATTTATTAACCTTACAAAA  | 5009  | AGG | 124  | 13   |
| TGCCAACGCTTAAGTTGTTA | 38624 | GGG | 1183 | 325  |
| ACAACTTCACGACGCAATAA | 15028 | CGG | 1808 | 193  |
| AAAATCCGGAGCTATCACAA | 10380 | GGG | 400  | 100  |
| GAAACAATAAGTAAACTTTC | 6075  | TGG | 1330 | 299  |
| ACTATGAAGGGGATATCAAT | 10471 | TGG | 335  | 73   |
| GTTTGATGTTCCGAGTAAAG | 18026 | AGG | 1502 | 70   |
| GTTGATTCTTCTATGCTATC | 37542 | CGG | 3407 | 483  |
| TGGAAGTGGTGCAAGAATAT | 15512 | TGG | 1491 | 123  |
| ATCTTTCAACAACCAATGCT | 15540 | CGG | 1379 | 130  |
| TTTGTAGCACGACTACCACC | 21548 | AGG | 777  | 151  |
| TAATTTATACGTAGACCTTT | 20017 | CGG | 642  | 44   |
| GTTCCGTTTCCTACTGCTCC | 38745 | AGG | 5924 | 76   |
| TTCATCCGTTTAAATCAATA | 20938 | AGG | 687  | 24   |
| TTACAACAAAATCGAACAT  | 1802  | CGG | 414  | 8    |
| CTAATAAAAATGATATGGAT | 39203 | TGG | 293  | 20   |
| GAAGTAAAATCGAATACACC | 31385 | GGG | 4001 | 275  |
| AGCAAACGCAAAAACAAGAT | 15112 | TGG | 611  | 123  |
| GTCACCTGATAACTTTTATT | 37593 | AGG | 144  | 11   |
| AGCTAGGCAACGACGTAAAG | 9667  | AGG | 859  | 241  |
| CCTGCTTCACCTTTTGCACC | 36793 | AGG | 1050 | 242  |
| TCATTTGGTCAAAACTGGAA | 38512 | CGG | 410  | 89   |
| TTCTTTCGCCATTTCTTCAA | 19468 | TGG | 826  | 150  |
| TGAACAAAGGTTATATAGTT | 12993 | GGG | 300  | 50   |
| GACACCAATTTCTTCAGAAA | 756   | GGG | 455  | 112  |
| ATGGAATCAAGATTTTAGGT | 7464  | TGG | 349  | 42   |
| CTATGCTTGCAGTTTGGAAC | 10847 | GGG | 2543 | 302  |
| GGCAACGCAGATTGTTTGAG | 2310  | TGG | 1629 | 269  |
| TATATTTAAATAACCTCTAT | 27568 | AGG | 567  | 38   |
| TATAACGGCAATGACACAGA | 11682 | GGG | 437  | 162  |
| AACTATCATTAAAAGTTAAA | 22519 | TGG | 100  | 10   |
| GTTTTCCGAAAATGGCATTT | 7177  | CGG | 550  | 186  |
| TTATCTGCATTAAAGCGTAA | 17417 | AGG | 607  | 30   |
| AAATAAATACCATTTATTAC | 830   | CGG | 110  | 16   |
| CTGGATAGACAAATGTCTAG | 35618 | GGG | 812  | 189  |
| ACGCCAAAAGTAACAGGTAA | 2471  | AGG | 542  | 44   |
| CATATCTCCTCCTATTCACT | 20425 | TGG | 1007 | 133  |
| TGAAGTACGACGAAAGTTAT | 7640  | TGG | 275  | 27   |
| TAAAAGAATAGCATCATTT  | 6437  | GGG | 286  | 18   |
| GAGTGATGTCTGTTGTTACC | 30829 | AGG | 5223 | 1376 |
| TGCGTCTGCGTCAATTGCA  | 21646 | GGG | 3603 | 249  |

|                      |       |     |      |     |
|----------------------|-------|-----|------|-----|
| CTTATCAAATACCGTGTCTT | 10514 | TGG | 458  | 122 |
| ATTGATCATATAGTTGTAAT | 34988 | GGG | 761  | 1   |
| AAAAAGCTGAAGAAAATAAC | 5074  | GGG | 144  | 51  |
| GTTTTTTTGGGGCAAAAAAA | 40235 | GGG | 142  | 42  |
| ATATTTGGCAATGTGTTCGC | 24980 | TGG | 1497 | 180 |
| GCTTTTTATTATGCACTTTT | 18877 | CGG | 1427 | 55  |
| TTTGATTACAATCCATTGTT | 16958 | TGG | 443  | 65  |
| TAGAAATAGTGTTGATGATG | 16651 | AGG | 675  | 61  |
| ATGATGATGTGTATGTTACA | 17827 | TGG | 3206 | 830 |
| GAGATTTCCAAAGCAACGTA | 23652 | AGG | 1133 | 165 |
| AAAACATCCAGTGACATGCT | 39871 | TGG | 70   | 10  |
| GTAGTTAAACATATGAATGA | 7048  | TGG | 914  | 62  |
| TTTTCTTTTGTGCTGTCAT  | 19663 | TGG | 656  | 58  |
| CAGCCATATTTTGCTTTAAT | 32000 | TGG | 1334 | 122 |
| ATTTTTAAAACATTCAGGCA | 31824 | AGG | 777  | 85  |
| CTCCGCCAAGATGACGATT  | 5883  | AGG | 303  | 53  |
| TCTTCAATATCGTTGATAG  | 36590 | TGG | 915  | 103 |
| GGCGAATGGTACACAACATA | 21615 | TGG | 550  | 168 |
| CACAAATAGAAATAGAGCTA | 3699  | GGG | 569  | 78  |
| AATTTAAGTTTATTGATGAT | 15922 | TGG | 1432 | 268 |
| ATTCATTTTAAAAGGTCATA | 3399  | TGG | 143  | 4   |
| GACGTTAATCTGGAAAGATG | 10687 | GGG | 398  | 61  |
| AGTTATTCAAAAATCACGAA | 1154  | AGG | 143  | 41  |
| TTATGTTATAGCTAGCCTTC | 39804 | GGG | 1094 | 170 |
| ACACTGCTAACAGCTGCAAT | 25342 | CGG | 1886 | 315 |
| CAGGTCGTTGATAATACTCT | 20788 | AGG | 308  | 32  |
| TTTGGAGCACTGTTACAAGT | 26100 | TGG | 626  | 88  |
| CATCCATTAGCACAATTGAT | 28409 | AGG | 213  | 2   |
| TATGTGTTTTCTGGTGTTGG | 2808  | TGG | 713  | 80  |
| TATGCACATACCAATGTTGA | 8130  | TGG | 1500 | 329 |
| ATTAATATAGATAATTATCG | 34463 | GGG | 175  | 28  |
| AATCAAAAAATACAACCAAC | 7597  | TGG | 2261 | 522 |
| ATTTCCCTTGTGATAGCTC  | 10369 | CGG | 458  | 15  |
| ATTAAGGCTTCAACACCATC | 15672 | AGG | 1383 | 423 |
| CGTACTTAACTTTTGCCATA | 21277 | TGG | 1937 | 110 |
| AAAAGAAGTAACCAAGACA  | 10519 | CGG | 1126 | 307 |
| ATTGAATTGCTATCATATTC | 13883 | CGG | 1094 | 249 |
| CAGAATGAACTATGAAACAG | 11353 | GGG | 164  | 39  |
| AGTCAAAGCTAAAGGGCATA | 8100  | CGG | 92   | 26  |
| AAAAGAAATCGATGTTAAAT | 36631 | TGG | 533  | 47  |
| AGCTTTTACTAAACAACAAG | 37273 | CGG | 607  | 98  |
| GAATGTTTTAAAAATTCATT | 31800 | CGG | 231  | 53  |
| TCGGTTGATTCTATATCTAA | 6310  | CGG | 414  | 157 |
| TGAACGACACAAATGATTTA | 38151 | GGG | 339  | 56  |
| TCCACTAAAAGCAGAAGTAG | 5306  | AGG | 327  | 48  |

|                       |       |     |      |      |
|-----------------------|-------|-----|------|------|
| TCATCAACACCATCTTGTCC  | 32421 | AGG | 2799 | 1024 |
| AAAATTATTACAAACAGAAT  | 5429  | TGG | 156  | 25   |
| GACAAAGAAATGACGAAAGC  | 23187 | AGG | 1789 | 219  |
| GGAACAACGGTACTGACGA   | 4004  | AGG | 320  | 95   |
| CATAGAGGTCGAAAAAGTGG  | 10881 | AGG | 311  | 8    |
| TAGTACCAAAGATAACAGCT  | 19896 | TGG | 550  | 18   |
| TTCCCTAACAACTTAAGCGT  | 38638 | TGG | 1187 | 172  |
| GTGACATACAACATCCCTGA  | 37734 | AGG | 2629 | 198  |
| AACAGAATGAACTATGAAAC  | 11351 | AGG | 299  | 19   |
| AGTTTAATTGATACTGGAGA  | 13239 | TGG | 825  | 12   |
| GATGGTGAAAGAGTTAAATT  | 11570 | TGG | 119  | 14   |
| CGTGGATAAAAGTTGATGAG  | 5812  | AGG | 181  | 15   |
| TACGATTAAGCAGATGAAC   | 15776 | TGG | 1182 | 45   |
| ACATTTAGTAAATCATTACG  | 39108 | AGG | 983  | 112  |
| TACGGTGCATATAATTACTT  | 35942 | CGG | 220  | 42   |
| ATTCACATTCCAGCAAGCAC  | 35599 | TGG | 4582 | 705  |
| GCAACGTTGCCGAAACCACA  | 13941 | AGG | 671  | 78   |
| AGCGTTTGATGAAATACTTG  | 11744 | AGG | 364  | 6    |
| GGCAAAGATGAAAAGTCAC   | 33878 | AGG | 1957 | 359  |
| GAAACAATCTTTATAAACGC  | 1308  | AGG | 3111 | 114  |
| AAGCAAGAAAAGTTTGTGCT  | 14594 | AGG | 1083 | 311  |
| CTGAGAATTTTTTCAGCTTTT | 22846 | CGG | 141  | 1    |
| ACTAACAAAACAAATACTGA  | 33696 | GGG | 608  | 194  |
| TGCAGTAATGCAATCATTTT  | 30100 | GGG | 555  | 103  |
| TAAAAGGTATCTACTTCACA  | 36195 | AGG | 628  | 94   |
| ATGAATTGATAAAAAAGAAC  | 9498  | GGG | 551  | 122  |
| GTTAGAAAAACGCGACGCAG  | 19224 | AGG | 1548 | 88   |
| CTAAATCAATGGCTCAACGA  | 23769 | TGG | 1271 | 12   |
| TTTATAGGCTCTCCGTTTGT  | 16166 | AGG | 1463 | 286  |
| TTTAGTTATAGTAACTTTGT  | 33295 | TGG | 818  | 153  |
| GAAACACTTTCTTCATCTAC  | 37945 | TGG | 3217 | 241  |
| CTGAATGGGTTTCTAACATT  | 26193 | TGG | 99   | 18   |
| CTTTTATATGAGCAAGAGCT  | 8793  | AGG | 115  | 10   |
| CCTTTTGACCAGGTTGTCC   | 36784 | CGG | 2490 | 637  |
| TTAATACGTCCATCAACAAG  | 28432 | CGG | 814  | 192  |
| GCGATCAGTTAAAACTACA   | 24537 | TGG | 2105 | 92   |
| TTGGTATCAAATCTAAGCT   | 4889  | AGG | 246  | 36   |
| TGATTACGAATTAGACGAAA  | 17596 | TGG | 437  | 13   |
| TATGAATGAACATGAATTA   | 13196 | GGG | 153  | 39   |
| ATACTTGATAAGTCTACTAT  | 27938 | TGG | 801  | 195  |
| TACTCATCGTTTGAATCGTC  | 32541 | TGG | 3652 | 24   |
| AGCAATTCAATTGCACAGTA  | 13911 | TGG | 611  | 19   |
| AGATAGAGTGTTTGACTTGT  | 10032 | GGG | 693  | 127  |
| CGAGTGTGGGACGAATATAC  | 10926 | AGG | 1295 | 321  |
| AGAAAAACAAAGATTTGTTT  | 6142  | CGG | 170  | 42   |

|                       |       |     |      |     |
|-----------------------|-------|-----|------|-----|
| TGGGAGAAATATAAGCGAAA  | 18597 | AGG | 92   | 35  |
| GTATCTGTTTTAATATACGT  | 12767 | TGG | 825  | 58  |
| TGATGCCGAAATATCGAGTG  | 10912 | TGG | 369  | 37  |
| ACAACATTCAAAGATTCAAC  | 12466 | AGG | 1577 | 460 |
| ATTTGCTATCCTTGAATTGA  | 461   | TGG | 979  | 239 |
| AATACTCCACTAATGTAATC  | 20876 | AGG | 1069 | 108 |
| AGCACAAACTTTTCTTGCTT  | 14575 | CGG | 642  | 134 |
| TTTGAAATGTACGAGATGGA  | 10556 | AGG | 998  | 403 |
| AAAACCCTTTCTGAAGAAAT  | 768   | TGG | 58   | 14  |
| ATACAAAAAAGAGCTGAAAA  | 7129  | CGG | 153  | 29  |
| CACTCCATTTCTTGAACATT  | 9759  | TGG | 122  | 26  |
| TGATATTTAGAGGTGGCACA  | 8834  | TGG | 718  | 93  |
| TTGATTTTGTCCAATAACTC  | 36925 | AGG | 709  | 118 |
| GCGATCAGTCTGATTTGATG  | 13783 | AGG | 273  | 57  |
| CGAAACGTTTCGAGGCACCTA | 8876  | TGG | 257  | 84  |
| GTCGAAGATTATTTTATCTC  | 27535 | CGG | 1473 | 384 |
| GAAATCCATACCAACCATCT  | 38234 | GGG | 942  | 156 |
| ACAATAGAAAATGTACGTAG  | 37630 | CGG | 926  | 266 |
| CAACGATATTTGATATTTAG  | 8824  | AGG | 633  | 182 |
| CGTCCACGCTTTCGTAATAC  | 8907  | AGG | 1676 | 369 |
| TCCTAAGTCGTCCTGACAAT  | 7007  | TGG | 350  | 27  |
| AAAGGAGAACAAGGCGCACC  | 36836 | CGG | 913  | 131 |
| GGAAGAAGCGAGTATCAATA  | 3735  | TGG | 212  | 18  |
| GACAAGTTTCAGAACGAACA  | 17544 | AGG | 1342 | 334 |
| GCCATAAAATGAGTATCCAA  | 23593 | AGG | 670  | 47  |
| ATTCATGACTTATCGTGAGT  | 18578 | GGG | 1101 | 53  |
| AAACAACAACGAAATATATG  | 11087 | CGG | 231  | 33  |
| ACTGCAACTACTGCTAATAT  | 25492 | TGG | 1372 | 24  |
| TTAACCAAGCAATAGATGAA  | 3515  | TGG | 547  | 150 |
| TTAAATATAACATTGAATCC  | 22901 | TGG | 3443 | 949 |
| ATAATAAAATTATAACCAGAA | 6865  | AGG | 351  | 55  |
| ATATGAATGAACATGAATTA  | 13195 | AGG | 177  | 9   |
| CGTTTAAATCAATAAGGTAG  | 20944 | AGG | 625  | 122 |
| GTAATTAATCCGTAAGCCAT  | 29611 | TGG | 1049 | 213 |
| CCTAGCTCTATTTCTATTTG  | 3682  | TGG | 166  | 21  |
| ATTGCAAATGCTAATTGTGG  | 9915  | TGG | 1435 | 256 |
| AATGACATTTCAAATGATTC  | 22457 | TGG | 2737 | 167 |
| ACTTGTTCTTTATGATAATA  | 16121 | TGG | 365  | 118 |
| ACTAAGCAAGATGTAGTATT  | 28685 | AGG | 358  | 99  |
| CAACCTACTCATGTCGAAAA  | 7726  | AGG | 74   | 9   |
| ATTAATAACCTAGTAAGGTT  | 6264  | AGG | 203  | 42  |
| GAAGAAAAAGAAAAGTGAAA  | 9068  | TGG | 55   | 14  |
| CTTGATTAAGCAAGGTATAC  | 35377 | CGG | 2772 | 379 |
| TGTACGTCTAACGGCTTACC  | 12027 | TGG | 405  | 20  |
| GATGAACGCTCAGATATTCA  | 35012 | AGG | 1280 | 239 |

|                      |       |     |      |     |
|----------------------|-------|-----|------|-----|
| CTCTAAGAGATATCTGTATC | 10109 | AGG | 103  | 3   |
| CATTCATGACTTATCGTGAG | 18577 | TGG | 724  | 139 |
| AAGAGGTTGAACTACGTAAG | 9684  | AGG | 636  | 49  |
| TATGTTTGGCACCTACAAA  | 16170 | CGG | 800  | 62  |
| CGGATTGTTCTATTTGTTCA | 11626 | CGG | 895  | 206 |
| AAGTTTATAACGGCTCAGC  | 4683  | AGG | 162  | 16  |
| AATTCTTTGAATATTATCTG | 12222 | TGG | 124  | 16  |
| GGAATATATATAAAGCAACA | 10245 | TGG | 286  | 99  |
| GGCAATACATGCAATCAGTT | 25971 | TGG | 405  | 11  |
| GCGTCACCTTCATCTATGTC | 17635 | AGG | 2260 | 279 |
| ATGGAAAGAGAAAAATCTTG | 19122 | AGG | 34   | 4   |
| ACTAAAATGTGGCAAATTGA | 36893 | TGG | 1357 | 113 |
| CCTTATTAACGCAAGGGTG  | 2350  | TGG | 128  | 42  |
| TTATATTGGGTTAAATCACA | 38947 | GGG | 302  | 10  |
| TAGAAATGTAAATGTAGAGG | 9418  | TGG | 168  | 66  |
| ATCTCTTAGAGCCGAAAAAT | 10081 | TGG | 45   | 11  |
| TAATAGAACTATCAAGTAAA | 556   | AGG | 118  | 13  |
| ACAGTATTAGACGCATGTAA | 9138  | TGG | 975  | 105 |
| ATTCAGGGAGCGAGATGCA  | 8432  | TGG | 504  | 39  |
| TGCCTTGCATAGGATTCCT  | 352   | TGG | 476  | 81  |
| AAGCGTTAATACGTGGTGTT | 35262 | TGG | 215  | 37  |
| GCTAAATGAAGATAGTTCTT | 27802 | TGG | 244  | 11  |
| ACCACTAACTTACCTAAGAT | 24953 | TGG | 546  | 183 |
| CAACTAATTCAAGAATTACA | 39452 | GGG | 172  | 77  |
| TGTGAAGCATAAGCAATTTT | 26970 | AGG | 163  | 26  |
| TGATATTGATGAGTATATCG | 17705 | AGG | 364  | 9   |
| ACTCTTTTTGCAACCATTCC | 9511  | AGG | 824  | 196 |
| TTTTTGATGTCTATTACCCA | 6034  | GGG | 549  | 52  |
| TAAATGGAACAAGTGATATT | 24174 | TGG | 366  | 63  |
| TGGATTTAACTAGAATAACT | 25431 | GGG | 303  | 39  |
| TCTATTATAAGGAAAACTTT | 588   | CGG | 64   | 2   |
| TTGTTGAATTACCTTTAACA | 32234 | AGG | 654  | 185 |
| ACGTAACGCTACAAAGTCTA | 28520 | AGG | 698  | 159 |
| TAAAGCTCAATCATTGCGTG | 18221 | TGG | 1052 | 126 |
| GCCAATTGTCAGGACGACTT | 6992  | AGG | 130  | 3   |
| CGAAAGATAGCAGACGAAGA | 15219 | AGG | 287  | 31  |
| TGCTCATACTTTGCGTTATC | 35380 | CGG | 2187 | 348 |
| GTCGTCGAGTTGTAGCTCGG | 1048  | CGG | 18   | 8   |
| AGTAATCGGAGACGATTTCA | 8418  | GGG | 273  | 32  |
| AAAGTTTACTTATTGTTTCT | 6095  | AGG | 334  | 34  |
| TTATTTCTCCAGTTCTATAT | 30321 | TGG | 798  | 15  |
| TTAGTGAAAACAAACTTTCT | 33455 | AGG | 422  | 36  |
| AGATGGTCCTACTACTATTG | 34667 | CGG | 337  | 71  |
| ACTACAGCATGGTCAATTGC | 3165  | GGG | 2011 | 558 |
| TAGAAGAATCAACAGCAAAA | 37568 | TGG | 166  | 53  |



|                       |       |     |      |     |
|-----------------------|-------|-----|------|-----|
| TTCTATAAATTTGCAGTATA  | 3908  | CGG | 190  | 65  |
| TATTCGATAATTTCTTTATA  | 7356  | GGG | 33   | 3   |
| AACACGAGCACAAACGAGCT  | 35680 | CGG | 275  | 85  |
| TAAAACCTTTCGTTATACTCT | 28014 | TGG | 1047 | 142 |
| ACAAGTTTACATTCAATGAC  | 29648 | AGG | 3853 | 737 |
| AACTCTTCTTTAAATTTAAT  | 33428 | AGG | 154  | 14  |
| GAGTCAATTGTTAATATGAT  | 13836 | AGG | 252  | 39  |
| CTTAAATACTTAGCGATATT  | 38802 | AGG | 189  | 53  |
| TTCAGTGATTTCTTAAATGC  | 26321 | CGG | 1431 | 220 |
| CTAACAAAACAATACTGAG   | 33697 | GGG | 280  | 55  |
| CAGATGAATAACGATAGAAT  | 34575 | CGG | 301  | 92  |
| GACGGTATGAGTGATGCACT  | 26282 | TGG | 1601 | 142 |
| AAAAAAATTATGCTTGTAGC  | 38722 | CGG | 2224 | 322 |
| CTAATTGTTCTCGAGTTGGT  | 22993 | GGG | 958  | 229 |
| TATTAATAAAAAATGATA    | 39198 | TGG | 57   | 6   |
| GCTGAAAACGGTGTGTTTAA  | 7141  | AGG | 950  | 14  |
| GGAGAAGAAAGCAAGTGCAT  | 11497 | GGG | 399  | 5   |
| TATCTGTCGTTAAATATATT  | 30373 | CGG | 325  | 59  |
| AACAATACGCCGTAAAGACA  | 29368 | CGG | 454  | 31  |
| CAACGACTCTAAAACGTATA  | 37030 | CGG | 451  | 19  |
| ACGGAATACTAGAAGATGTT  | 20704 | AGG | 651  | 129 |
| CGTTCAATAAATGTGAAAGG  | 14452 | AGG | 287  | 32  |
| ACTGTTGCATCTCTTAAAGA  | 7905  | CGG | 568  | 53  |
| TGAAAGAGTTAAATTTGGAA  | 11575 | TGG | 283  | 64  |
| TGGTTTATGTTAATTAATCA  | 15132 | CGG | 559  | 68  |
| TTGGTAAGTGGAACCTTATCC | 33094 | AGG | 1032 | 216 |
| ATACGTAATTGTTGTGTTGT  | 39466 | TGG | 772  | 23  |
| GATCAGAATTTTAAATCAAG  | 18402 | TGG | 32   | 9   |
| TCAATCTTAGCTTTTTCTTC  | 13094 | AGG | 502  | 9   |
| TTACAGGAGATGAGAGAAAA  | 4091  | CGG | 67   | 37  |
| TATCTGCATTAAAGCGTAAA  | 17418 | GGG | 337  | 2   |
| ATGAAAATATAAGGGAGTGT  | 12626 | GGG | 363  | 83  |
| AAGCAACGTGATGAGCTTAT  | 11438 | TGG | 516  | 136 |
| TTTCAATTAATAACCTAGTA  | 6269  | AGG | 53   | 23  |
| ACAGAATGAACTATGAAACA  | 11352 | GGG | 186  | 63  |
| CAACTGACAGCTAGATATTT  | 23282 | AGG | 203  | 52  |
| TTTACAACGCGCTAAATCAA  | 23758 | TGG | 584  | 116 |
| GCCAGTAATTGTTGAGTCAT  | 34865 | TGG | 424  | 125 |
| TATTGAAGAAAGGTTATAAC  | 14104 | AGG | 499  | 122 |
| TTTACCTTAATATCTTCTGC  | 20457 | AGG | 1233 | 368 |
| TACTCATCGTCATTTAGATG  | 18365 | GGG | 628  | 55  |
| CAATTTGCGGATATGGTGCT  | 16698 | AGG | 343  | 101 |
| AAATGGTTTGACAATTCATT  | 38215 | AGG | 215  | 38  |
| AACTTCAATTGCAGAACAAA  | 29258 | AGG | 207  | 110 |
| TCCTTAGTTGATAGATTTTT  | 19309 | AGG | 176  | 44  |

|                        |       |     |      |     |
|------------------------|-------|-----|------|-----|
| AGAGATATAGAACTTCACTG   | 5385  | GGG | 173  | 35  |
| ATAAATTCGGAACAACGAGC   | 32705 | TGG | 1533 | 41  |
| GTTTTCCCGTCAAAGTATGG   | 38437 | TGG | 1165 | 198 |
| CTAAAAATTGATGTGCAGAC   | 31425 | GGG | 2622 | 582 |
| TAAACCTGAACGATTAAGGA   | 16256 | GGG | 123  | 11  |
| ATTAAGTGGTACGTAGACAT   | 33804 | GGG | 445  | 156 |
| ATATGACGATGACGTTAATC   | 10677 | TGG | 867  | 198 |
| AATGATGGAAGTATATTGTC   | 7327  | GGG | 586  | 124 |
| ACAAGAGTGCCGATTTACC    | 32830 | AGG | 1221 | 306 |
| GCCAATGACTCAACAATTAC   | 34880 | TGG | 219  | 38  |
| CAAGTATCGATGACTGATTC   | 30923 | AGG | 926  | 180 |
| TGGAATGAACTTAACTTA     | 17323 | TGG | 799  | 111 |
| TTAATAGGACGAGGTATAGA   | 15867 | TGG | 680  | 129 |
| TGAAATCCATACCAACCATC   | 38235 | TGG | 1520 | 267 |
| GCATCTGCAAATACAATTTT   | 2197  | TGG | 68   | 21  |
| AGCCAATCACGCCATTCAGC   | 23323 | AGG | 2521 | 671 |
| CTGTCTATAGAAGTACTTAC   | 26569 | AGG | 1281 | 10  |
| ACAACATCGTCGATAATAAG   | 36439 | GGG | 705  | 115 |
| AAGAATGACATTGAAATAGA   | 14834 | GGG | 578  | 23  |
| CTTATCTGAAACGACGTTAA   | 35308 | AGG | 763  | 223 |
| CGACCTCTATGCTTGCACTT   | 10853 | TGG | 233  | 68  |
| AAAGCAATACGTGATGATGT   | 18192 | CGG | 583  | 107 |
| AAAAATACAACCAACTGGCA   | 7602  | CGG | 603  | 163 |
| ATGAGAGCACGTAAAGACGA   | 18537 | TGG | 1443 | 214 |
| GGCAATGTGTTTCGCTGGTAT  | 24986 | TGG | 1115 | 378 |
| GAAGCCTTAAACGCACCTTA   | 9572  | TGG | 679  | 91  |
| ACTTATACATCAAGCAAATC   | 32482 | TGG | 1375 | 36  |
| TTATTAGCTGACTTACAAGA   | 22218 | AGG | 462  | 28  |
| GTTGGTTCAGTCGTGTTGCT   | 26118 | TGG | 725  | 90  |
| TAAACTACTACGACTTAAGC   | 21268 | AGG | 1412 | 325 |
| ATACTAAACCTGAACGATTA   | 16252 | AGG | 572  | 43  |
| AATCCCTCAATAACGCCACC   | 33096 | TGG | 1650 | 247 |
| TTAATTTTTAATGTTGTAAT   | 22772 | TGG | 334  | 70  |
| TTACTTGTACTAGATGATAT   | 8230  | GGG | 254  | 3   |
| GAAAAAGAAGATTTTGA AAC  | 16454 | TGG | 141  | 15  |
| AAGTTGAAGATGTTGTTGTG   | 13978 | AGG | 209  | 57  |
| TAAAAGCGTTTTAGCGCTT    | 1903  | GGG | 231  | 10  |
| AATAGTTGGACAGGTTCTCC   | 34751 | GGG | 471  | 40  |
| TGGTAAGCCTATAGGTGGTT   | 39276 | TGG | 452  | 14  |
| TTACTATAACTAAAATTATG   | 33320 | GGG | 370  | 45  |
| GGTAAAATGGCAGCAATTTG   | 16685 | CGG | 517  | 30  |
| ATTA AAAAGATTTTATGTTTG | 11219 | AGG | 547  | 78  |
| ATAATCCAACATCTCAAGAA   | 38028 | GGG | 336  | 53  |
| TATTTCAACAAATGAATGGT   | 6474  | GGG | 703  | 104 |
| CACAAAGTAGTCAGCGCGGT   | 26390 | AGG | 196  | 93  |

|                      |       |     |      |     |
|----------------------|-------|-----|------|-----|
| ATGTAGTTGAATTCTTTGAA | 11981 | TGG | 193  | 29  |
| TCGTAATTATCTATTTCTAT | 21986 | AGG | 176  | 35  |
| GAATACTTAAACCAATTTTT | 10086 | CGG | 25   | 4   |
| AACGCTTAAACCAACTGAAT | 20431 | AGG | 272  | 37  |
| ATACGTCCATCAACAAGCGG | 28429 | TGG | 1424 | 83  |
| GCGTCTTTAAAAATAAAAAA | 69    | GGG | 16   | 1   |
| GAGAATTACAAGGAAATCAT | 23226 | GGG | 401  | 21  |
| CGGTAATCTTCGCGCAAC   | 24268 | AGG | 1152 | 92  |
| CCTGCATCTCTAAACGCTTT | 31045 | CGG | 376  | 65  |
| TGAATATGCACAAGCAGAAA | 19771 | TGG | 631  | 145 |
| GTAGTTGAATATAACGTTAC | 26854 | AGG | 854  | 127 |
| TTCAACACCAGTAGCAACGA | 5229  | CGG | 144  | 41  |
| TGCTATCAAATGCTTAATTT | 35741 | AGG | 95   | 18  |
| AGCCTGTAACACTTACATAA | 34773 | GGG | 400  | 114 |
| GATACTTTGCCGTTATTACA | 23067 | AGG | 409  | 57  |
| CAGGTACCGACCATTTTTCA | 27287 | GGG | 690  | 201 |
| TAATATCACTTAGATATGCT | 30960 | GGG | 653  | 212 |
| ATGGCGTTGCGCAACCTGGT | 38549 | TGG | 333  | 77  |
| TCACATCATTTGGTCAAAC  | 38507 | TGG | 395  | 107 |
| ACGACAATATCCAACTTTTG | 38400 | CGG | 276  | 80  |
| ACCTCTACTTCTGCTTTTAG | 5291  | TGG | 392  | 95  |
| GCAACTCCAACATACACGCC | 19544 | AGG | 4134 | 878 |
| ACTTACTTAGCAAAAGGTGT | 19706 | AGG | 446  | 44  |
| AGGAGGCAACCAATGGCTTA | 29618 | CGG | 459  | 34  |
| ATAACCAAATGTTCAAGAAA | 9771  | TGG | 30   | 2   |
| AAGAACTGGAAGAAGAAACC | 12025 | AGG | 572  | 112 |
| GATTTAGCTGAAATAGTACG | 22260 | AGG | 156  | 38  |
| CTTTTGCATAGCGTATGCT  | 8060  | AGG | 356  | 54  |
| GTGTATATTTGCCAATTGTC | 7002  | AGG | 4620 | 631 |
| TTGAAAATGATTTAGTTAGT | 31919 | GGG | 1395 | 315 |
| CTTCTTCATCTACTGGTAT  | 37939 | CGG | 249  | 37  |
| AACGATTCAAAGGCGCTCAC | 8770  | GGG | 1083 | 177 |
| TAAGTGACATCGAACCAGTA | 9733  | CGG | 405  | 20  |
| AAATGAAGCTGATTTAGATA | 18759 | TGG | 476  | 130 |
| GAAATACATTTAGACGCAGC | 38986 | AGG | 726  | 152 |
| GATAACATGTAATGATTACC | 30148 | TGG | 1232 | 272 |
| AATCAATCGCAACAGAGATT | 14055 | GGG | 30   | 11  |
| ATTGAACAAGCGCAAGCTAA | 23405 | CGG | 426  | 151 |
| TACTCAATTGAATCGCGTT  | 33135 | AGG | 512  | 51  |
| AATTATCGTTTATCTGAATT | 39172 | AGG | 229  | 5   |
| TTTCTGTTCAATTTAGAGTT | 14132 | AGG | 297  | 130 |
| TGGTCTTTGATGTAAGTACC | 31085 | TGG | 5512 | 611 |
| ATGGCGCTTACTTTTACAC  | 10165 | GGG | 636  | 74  |
| AGAAGCGAAAGAGAAGTACG | 12561 | AGG | 153  | 11  |
| CCTATCAAAGAATACTTTGC | 15807 | TGG | 1131 | 122 |

|                      |       |     |      |     |
|----------------------|-------|-----|------|-----|
| TCAGATACACAACCTATGCA | 30587 | AGG | 1596 | 71  |
| CCGATAATTTGAGCGACTGC | 25276 | TGG | 2122 | 356 |
| AGTGGTAAACCGCTTGTTGA | 19958 | AGG | 1171 | 231 |
| CATCATTCTTTTTATAAAAC | 32594 | GGG | 241  | 47  |
| GAACAACCGGTTTTATATCC | 27628 | AGG | 890  | 220 |
| ACCACAGATCCTATTAATTT | 40194 | AGG | 79   | 25  |
| CGATATTTGATATTTAGAGG | 8827  | TGG | 227  | 7   |
| GGTAAATCCTAGAATTGTTA | 27993 | AGG | 247  | 68  |
| AAAAGAATTTGATGACGTGT | 16202 | TGG | 1801 | 269 |
| GCATTAGCTCCTGTTGACTT | 21423 | AGG | 283  | 13  |
| ATGATGTCAGGTACAGAAAA | 2060  | AGG | 111  | 35  |
| GGCTAATTACAGATATCCTA | 34564 | AGG | 433  | 48  |
| TTTTTGAACATACTTGTCAA | 19363 | AGG | 406  | 101 |
| CCGCCCATGATTGCTTTTGC | 36016 | TGG | 1764 | 267 |
| TCTAAACTTACAGATGATTA | 32287 | CGG | 589  | 72  |
| GAAAGTGTATTGCAACAGAT | 37145 | TGG | 610  | 129 |
| TAGATAGAGTGTTTACTTG  | 10031 | TGG | 262  | 3   |
| ATAATTATGGATCCTATTTT | 6801  | AGG | 75   | 13  |
| AAAAACTTAAAAATATGGAT | 13274 | TGG | 138  | 39  |
| TTCTTCAATACTGTCTTTAA | 28064 | AGG | 464  | 109 |
| ACAGTTCGCTACACAATACG | 21938 | AGG | 508  | 61  |
| TAATATCGTAAAAGCGTTAG | 25177 | TGG | 487  | 63  |
| AGAATTGGTTAACACCTCTT | 30867 | TGG | 549  | 36  |
| TTGATATCAAAACAGCTGAA | 7505  | TGG | 96   | 1   |
| TAGAAACATTCTCTAAACT  | 6734  | TGG | 38   | 8   |
| GAATCATTTAAATTAACAAT | 22317 | TGG | 299  | 42  |
| AGTTGTCTATAAATATGAGG | 11843 | AGG | 581  | 193 |
| GCATTGATACCAGTGATTGC | 24320 | CGG | 1569 | 16  |
| AATTAACCTACCCACCATAT | 14403 | AGG | 1335 | 319 |
| TATGGATAGGTTTAAGCAAG | 16139 | AGG | 685  | 171 |
| ACGCTTGTGGAAAAGCTAAA | 40280 | AGG | 75   | 12  |
| TTCAGGCAAGGTGCATGCTC | 31836 | AGG | 218  | 35  |
| AAAAAGTAGAGCTTAAGATA | 26954 | AGG | 260  | 54  |
| CAGGAGAAAGCGCAAGTGGT | 39005 | GGG | 407  | 67  |
| TAAAAGATTTTATGTTTGA  | 11220 | GGG | 428  | 15  |
| TTTACACCAATAAATAGCTT | 18425 | GGG | 320  | 97  |
| AGCAACTAACTTTATTTTAG | 10288 | AGG | 158  | 25  |
| ACACATTGTACCGAATTAGA | 36096 | TGG | 161  | 30  |
| TTTTTCGGGAATTTCATTTT | 13034 | AGG | 134  | 39  |
| GACATCGCAGTTTGGCACCC | 34634 | TGG | 2499 | 851 |
| AGTTGGGATCAATGTTGAGG | 13009 | AGG | 157  | 20  |
| TTTGAAAGCAGTGGCCAATT | 5136  | TGG | 32   | 1   |
| CAAAAAGCTGAAGAAAATAA | 5073  | CGG | 3    | 2   |
| GCTTTTTGCTTATCTGTCTT | 5042  | CGG | 236  | 2   |
| AATGCCCTACATCTTGTGC  | 14480 | AGG | 1785 | 379 |

|                       |           |      |     |
|-----------------------|-----------|------|-----|
| GCGCGCTCTAGATTTAACTT  | 8981 AGG  | 101  | 14  |
| CAAATAGATAAAGGTGACAG  | 14987 TGG | 1053 | 158 |
| TTAGCATACCTTGTGTTACG  | 17090 CGG | 655  | 191 |
| GGCTCAGCAGGGTTTCAAGC  | 4695 TGG  | 2325 | 300 |
| GGTGTGACTTAGGTGACAT   | 36287 TGG | 812  | 132 |
| TTTGACACAACACAAACATC  | 27196 AGG | 796  | 56  |
| AATTTAGATGCATCTACTTT  | 28096 TGG | 413  | 58  |
| TGCAAAAAGATTTCTTTAATG | 19849 AGG | 31   | 14  |
| ATTC AAGAAACACAAAAGAG | 17135 TGG | 562  | 114 |
| TAAAACAATTAAGGATTTA   | 21073 TGG | 161  | 36  |
| AGATGTTAAAGCTAATGATA  | 27465 AGG | 463  | 73  |
| CTGTGGTTTTGTTGGTTGTA  | 40162 GGG | 7    | 1   |
| AAGTTAAGAAGTAACGCGCT  | 19258 AGG | 794  | 267 |
| TTATAGCGTTGACCAAAACT  | 34720 GGG | 82   | 21  |
| CTCATCAATATCATTCTGAT  | 17679 TGG | 293  | 46  |
| ACAATCCAATGTATTTTATT  | 38609 AGG | 59   | 23  |
| CATTGATCATATAGTTGTAA  | 34987 TGG | 246  | 65  |
| TGTTTTTGTCCGTGTCTTTA  | 29361 CGG | 587  | 90  |
| TATAATTGCTTTTATATAGT  | 40003 AGG | 211  | 87  |
| TAATTAAGTAAAGTGTATTA  | 37371 GGG | 370  | 50  |
| AGAACTGGAGAAATAACTTA  | 30344 TGG | 78   | 8   |
| GATGATTATAACGTAGATAG  | 31729 AGG | 190  | 2   |
| TATTAGACGAGTTAATTA AA | 10350 TGG | 68   | 1   |
| ATAGCGCAGACATACAAGCT  | 13526 AGG | 269  | 27  |
| CCTTTAACCGCCATTTTAGC  | 23980 GGG | 1127 | 186 |
| TAACAACATCACCTATTTTA  | 28563 GGG | 605  | 85  |
| TAAATCTTTTTAGAGTTATA  | 32910 AGG | 350  | 105 |
| GGATTCTGAAATAGGTAAAA  | 16672 TGG | 352  | 108 |
| AATACTTGTGTTGTGTTACC  | 31387 CGG | 1266 | 168 |
| CCTTACAACACTTCAACTAG  | 19940 TGG | 661  | 175 |
| TATCAATTCATTTTCATGTT  | 9470 CGG  | 81   | 13  |
| ATGCTTGGTTTTTCGTCTGA  | 35542 TGG | 33   | 1   |
| TTAATTAAGTAAAGTGTATT  | 37372 AGG | 319  | 53  |
| TAGTATTAGGAGACTTTACA  | 28698 AGG | 427  | 69  |
| ATTTAAGTTTATTGATGATT  | 15923 GGG | 352  | 38  |
| CGTATATTTCTTCTTTTGA   | 29736 TGG | 544  | 192 |
| CAGTATCCCTGATATAGAC   | 22054 AGG | 1352 | 288 |
| AACAATGATTTTATGAAAGA  | 20736 TGG | 84   | 8   |
| TAACGACCCTGAAAAATGGT  | 27297 CGG | 289  | 74  |
| AGATTTAGCGTTTTAAGGTG  | 5171 TGG  | 56   | 28  |
| TGTT CAGAACTTATAGATAA | 31662 CGG | 397  | 108 |
| AATGAATGTTAAGCGAATAT  | 35704 GGG | 403  | 105 |
| CGACGAAAGTTATTGGGATT  | 7647 AGG  | 67   | 8   |
| ACATTAGTGGAGTATTAAC   | 20899 AGG | 275  | 29  |
| TTAACGATAGAAAAAGATTA  | 12956 TGG | 110  | 25  |

|                       |       |     |      |     |
|-----------------------|-------|-----|------|-----|
| TCATAGAGGGCAAGAGCCAA  | 14619 | CGG | 104  | 11  |
| TTATCTAAAGGGACTTAAGA  | 19002 | CGG | 111  | 8   |
| CGTTACGAAATAAGAGAACC  | 23483 | TGG | 402  | 51  |
| TTGCGTCCTGCGTCAATTGC  | 21647 | AGG | 1555 | 31  |
| AACGGAAATGTACCTATCAT  | 17303 | TGG | 1139 | 218 |
| GTGTGATATGCGTCAAACAC  | 29449 | TGG | 1387 | 308 |
| TCGTCATGATTATGATTTTT  | 37213 | TGG | 63   | 27  |
| TGAAAAAGGGCAAACGCTTG  | 40267 | TGG | 49   | 28  |
| GCTAATTACAGATATCCTAA  | 34565 | GGG | 370  | 105 |
| ACTCTCAATGAGATTAAATT  | 34024 | AGG | 89   | 30  |
| CCAATGTACTTGATACGATT  | 25950 | TGG | 178  | 21  |
| CTAACACATCACCTATTTT   | 28564 | AGG | 98   | 8   |
| CGTATCGATCTAAAAGCACA  | 36377 | TGG | 137  | 11  |
| TTTTCAACAGGATTTAGTGA  | 10412 | TGG | 394  | 44  |
| TTGTATTCTAAATTAATAGC  | 39244 | CGG | 79   | 9   |
| GCACATATCCATGTAGTGAA  | 10146 | TGG | 346  | 64  |
| TTATGATTTGTATAAGCTGT  | 8936  | TGG | 569  | 78  |
| AGGAAATATCTCAGTTATTA  | 27513 | AGG | 398  | 82  |
| AACAATTCAACCCAGATGGT  | 38240 | TGG | 591  | 113 |
| GGTATATATGCTACTGGTCC  | 21546 | TGG | 645  | 32  |
| GTATTCGATAATTTCTTTAT  | 7357  | AGG | 55   | 2   |
| TCTACCGCTTCTTTACCTAT  | 29095 | TGG | 163  | 53  |
| TAAGCGCAGTTAACACATCT  | 32351 | AGG | 148  | 17  |
| ACATACTTTTTGATTGAGTA  | 20756 | AGG | 483  | 37  |
| AACCAAGCTATGTTGATAGA  | 376   | GGG | 778  | 189 |
| GTAAGTCGTAAGGTACATAT  | 21141 | AGG | 321  | 8   |
| CGATAAGAAAATAGAAGAGT  | 21350 | GGG | 243  | 68  |
| GAAAATCCGGAGCTATCACA  | 10379 | AGG | 601  | 68  |
| AATGGTTTGACAATTCATTA  | 38216 | GGG | 178  | 42  |
| GACGCAAAGCGCTTTTAATA  | 30810 | GGG | 108  | 29  |
| GATAATCCAACATCTCAAGA  | 38027 | AGG | 4    | 1   |
| AACTAACAAAACAAATACTG  | 33695 | AGG | 213  | 62  |
| TAGGGAATGGAATACACAGT  | 7338  | CGG | 855  | 42  |
| TATTAGAATTAACCCAGTTT  | 34716 | TGG | 753  | 110 |
| ACTTTAAATATTTTCGATGGT | 21466 | GGG | 416  | 107 |
| TAGATTGGTTAACTCAATTG  | 25653 | TGG | 190  | 33  |
| AGCAACGTGATGAGCTTATT  | 11439 | GGG | 23   | 12  |
| TCAAATGCTTGTTTGTCTTT  | 27102 | TGG | 249  | 9   |
| AACGTCCAGCAAATAGTGCT  | 27008 | TGG | 381  | 99  |
| TGAGGAAGAAGCCACGAATA  | 10815 | CGG | 190  | 37  |
| ATTAATCGGCAAAGTAGCTG  | 26350 | AGG | 332  | 83  |
| CTTACTACCTGCCTATATGG  | 14408 | TGG | 54   | 1   |
| GACGGTAAACATACCTATAG  | 27571 | AGG | 436  | 92  |
| TCTTTGCTTTATTATCAAAC  | 38333 | GGG | 700  | 147 |
| TTATTGTTAATTGTTATTGA  | 4510  | AGG | 185  | 57  |

|                      |       |     |      |     |
|----------------------|-------|-----|------|-----|
| AGCGACAGGAGAGGTAGACA | 39576 | AGG | 329  | 50  |
| AAAAAGGTTATCAAACACGC | 36506 | TGG | 279  | 44  |
| TGAAGAAGAAATATTTAAGA | 20675 | TGG | 48   | 3   |
| TCGCGAGTAAAGTAGCTGAT | 26232 | GGG | 312  | 36  |
| TACAAGGCACTGATGATGAT | 29184 | TGG | 416  | 93  |
| TTGAAATGAGGTGCATACAT | 34364 | GGG | 162  | 42  |
| CTAAAAATTAATTAAGGA   | 4603  | CGG | 50   | 1   |
| GAGAAATATAAGCGAAAAGG | 18600 | TGG | 453  | 71  |
| AAAACAGTTACAACTGCTAA | 28907 | TGG | 1060 | 316 |
| ACTAGTGTTTGCATATAATA | 10577 | CGG | 288  | 10  |
| GTTTTAATGTCTTTAAAAGT | 33731 | TGG | 240  | 87  |
| AGCAAACGCACGCAAGTTTG | 24682 | AGG | 39   | 28  |
| TATACTATCTGTCAAAGTAG | 26540 | AGG | 361  | 79  |
| GCCTTTGGATACTCATTTTA | 23608 | TGG | 247  | 39  |
| GAAGTTGAACAACAAATCAA | 32221 | TGG | 281  | 31  |
| GCTGGAATACTGCGATTATT | 13312 | CGG | 154  | 16  |
| AAAATAAAAAGATGCAACAA | 400   | TGG | 120  | 16  |
| TCGTCCCACACTCGATATTT | 10901 | CGG | 176  | 25  |
| GATTAAAAACTTAAAAATA  | 13269 | TGG | 33   | 6   |
| TTGCCAACGCTTAAGTTGTT | 38625 | AGG | 78   | 14  |
| TTATAGGCTCTCCGTTTGTA | 16165 | GGG | 573  | 168 |
| TAGCACTAACACCTGCTGAA | 23328 | TGG | 492  | 105 |
| TCATTCATATTAGCCATCAT | 13166 | AGG | 326  | 56  |
| CGCTCAGAACTCATAGATG  | 8501  | AGG | 193  | 10  |
| AACTAGGTGTAATGGACGCT | 11379 | AGG | 222  | 92  |
| GAGTTTTCCCCTTGTGGTTT | 13934 | CGG | 208  | 21  |
| AGGTTTAGTATGTGTGTATA | 16224 | TGG | 655  | 160 |
| TCCTGCCGTAAATATAGAG  | 6373  | CGG | 308  | 138 |
| GACCGGTTTACCATCATACA | 40364 | AGG | 536  | 63  |
| ATAGACAGGTTTACTAAGCA | 22068 | TGG | 593  | 87  |
| TAGATATAAAGAGTCTATTA | 15656 | AGG | 76   | 15  |
| CTTGTTTCAGTAACGATGCT | 35557 | TGG | 191  | 52  |
| ATGAAGGCTTTTTCCACT   | 37484 | TGG | 31   | 6   |
| CAAAGCAGAACCTGAGTTAT | 36931 | TGG | 281  | 44  |
| ATGCTCGGGATGGTCAGGGT | 15525 | TGG | 814  | 130 |
| TAAGTACGGTGCTGATAGCA | 21308 | TGG | 571  | 150 |
| GTCGTTTTCCCGTCAAAGTA | 38434 | TGG | 58   | 20  |
| TTTGATACAGCGGAAGAGCT | 10224 | CGG | 103  | 21  |
| AAAGAGTGGTTTGAAGCTGC | 22575 | AGG | 744  | 63  |
| ATCAAGTGGGTGTGTTGGGC | 18416 | AGG | 1222 | 163 |
| ATAGAGTTAACTAACAATA  | 15306 | TGG | 144  | 54  |
| ATGAGTGTCGTGAAGATTA  | 9446  | CGG | 69   | 14  |
| GACGTCCAAGCACTATTTGC | 27019 | TGG | 1166 | 239 |
| TGTCCTAATACTTGTAAAT  | 25693 | AGG | 152  | 26  |
| AACACAACAATTACGTATGA | 39487 | CGG | 372  | 77  |

|                       |       |     |      |     |
|-----------------------|-------|-----|------|-----|
| CTATAAATATGAGGAGGCAC  | 11849 | AGG | 999  | 258 |
| GTGTGAGGGAATTCGTCGTA  | 20968 | TGG | 113  | 49  |
| AGAAAGTTTGTTCCTACTAA  | 33474 | CGG | 313  | 19  |
| GCTCTCTCGTTGCATAATTC  | 9614  | TGG | 349  | 61  |
| CACTGGATAGACAAATGTCT  | 35616 | AGG | 92   | 38  |
| CATGAAGTTGCATTATACGG  | 38851 | TGG | 240  | 58  |
| AACAACCTCATTGAAAGATTA | 24206 | CGG | 209  | 70  |
| GTATACGGAAAAATTGGCTC  | 3923  | AGG | 67   | 13  |
| TTAGATCGTTATCATTGAA   | 19090 | AGG | 378  | 107 |
| AATTACGACTTGATTAAGCA  | 35369 | AGG | 71   | 18  |
| CGAAAAGGTGGTAATTGATA  | 18612 | TGG | 152  | 10  |
| TTAATAATTGTCTTTGATCT  | 23367 | AGG | 317  | 5   |
| ATTTTGCTACATTAATTATA  | 39661 | GGG | 94   | 19  |
| ATAGATACTTCAGATAAGAA  | 24634 | TGG | 176  | 23  |
| ACATTGCCTGGCGTGTATGT  | 19534 | TGG | 454  | 172 |
| GATTCACCCACAACAATATA  | 21830 | TGG | 200  | 9   |
| GAGTAATCGGAGACGATTTT  | 8417  | AGG | 506  | 6   |
| GAAGCGCCACCGCTTGTTGA  | 28439 | TGG | 1047 | 357 |
| AATAAAAAAGGGCAGAAAAA  | 80    | GGG | 11   | 1   |
| ATCTAATCGAACAAGAAGTA  | 19145 | CGG | 342  | 81  |
| TAATGTTTGGATTTACCAA   | 33944 | CGG | 145  | 32  |
| TTCTTTACTTCGTATAAGAT  | 13599 | CGG | 123  | 11  |
| TGGGAAATTCCACCTTTATG  | 6700  | TGG | 740  | 216 |
| TCGCTATTGCGTTAGATTGG  | 6827  | GGG | 278  | 30  |
| TAACCTCACAGTCATATCTA  | 11275 | AGG | 465  | 42  |
| CGTGGACGAGGCGAGCCCAT  | 8876  | AGG | 123  | 18  |
| TGAGTTGTTTCGACAAAGATA | 17164 | TGG | 292  | 50  |
| GATTTTCCTAAAGACTTTAA  | 31343 | AGG | 104  | 15  |
| TCAATGGACTTTACATTTGA  | 19452 | AGG | 80   | 4   |
| CGTTTTAGCAATATGATTCT  | 29843 | AGG | 73   | 8   |
| AGCTCCTGCACAAGATGTAG  | 14492 | GGG | 191  | 9   |
| CTCTTATCACCTTCGTTTGT  | 27318 | AGG | 249  | 18  |
| GGGTGTCTTACTAAACTTCC  | 34753 | CGG | 751  | 185 |
| AAAAAGATTATGGCTTATAT  | 38933 | TGG | 185  | 38  |
| TATAACGATCCTGGAGCAGT  | 38752 | AGG | 705  | 128 |
| CATTGATACCGTCGCCGTTA  | 29850 | TGG | 102  | 18  |
| ATTGAAGAAAGGTTATAACA  | 14105 | GGG | 438  | 56  |
| CGGAAAGCATATATTGACGC  | 14639 | AGG | 1062 | 254 |
| GTTTACACCAATAAATAGCT  | 18426 | TGG | 81   | 5   |
| TCAGATACATGGCCTCTGCC  | 40024 | CGG | 536  | 61  |
| AAAAATGATGGTGTGACTT   | 36278 | AGG | 110  | 4   |
| ACAGTTCTAACATTTTTGAC  | 25035 | TGG | 1166 | 377 |
| CGATCAGTCTGATTTGATGA  | 13784 | GGG | 883  | 151 |
| TTACTCGTTTCTACACTCAT  | 5540  | AGG | 222  | 61  |
| AAAGTTACATTACAGCCCCT  | 6034  | GGG | 258  | 45  |



|                       |       |     |      |     |
|-----------------------|-------|-----|------|-----|
| TACGTCAGCGATTTATAATC  | 30412 | CGG | 269  | 27  |
| GATATGAAAATGTGGATTCT  | 34159 | CGG | 81   | 5   |
| GACTTTAAATATTTTCGATGG | 21465 | TGG | 354  | 161 |
| GTTGTTTCAAATGTACGAGA  | 10552 | TGG | 883  | 132 |
| TTCTATGAACGTAATATCAA  | 15699 | CGG | 196  | 20  |
| ATATCACTGTTCCCTATGGCT | 25812 | TGG | 1547 | 294 |
| ACTTTTTGGCAGTAAATTTG  | 7566  | AGG | 17   | 2   |
| CCAGCAAAAGCAATCATGGG  | 36032 | CGG | 286  | 85  |
| TCTGTGGTTTTGTTGGTTGT  | 40163 | AGG | 42   | 8   |
| AATACTTTGCTGGTGTGCAC  | 15817 | TGG | 1066 | 123 |
| ATTCGACTAAAGGTAAGAGT  | 14664 | GGG | 223  | 19  |
| GTCATTGACATTAACGAAGG  | 3983  | TGG | 75   | 9   |
| CGATTCAAGGTGTAGTAGAT  | 25638 | TGG | 181  | 11  |
| TAGCGCGTTGTAAAGCTCTT  | 23733 | TGG | 175  | 58  |
| TCAAAGTATGGTGGCGGAGC  | 38446 | TGG | 424  | 173 |
| ACAGTTAAGAGTCAGTGCTT  | 34322 | CGG | 186  | 37  |
| TGTATTAGCTGATGTAATAC  | 13880 | CGG | 290  | 129 |
| TCGTTATATAGCGACAGGAG  | 39567 | AGG | 792  | 38  |
| AATCATAAAGCGTATATACA  | 8967  | AGG | 122  | 34  |
| GGTAATAGAATAAGTAGTTT  | 39601 | TGG | 130  | 29  |
| AATCAAGAAAAGTTTTATAA  | 4674  | CGG | 23   | 2   |
| GCAATACCTTTAAAGTCTTT  | 31333 | AGG | 286  | 25  |
| GGTATTAACAGCAGTTTTT   | 25613 | CGG | 31   | 8   |
| CATTTCCCTTCTTGAGATGT  | 38017 | TGG | 317  | 85  |
| TCATACTACGCCAATATTA   | 35319 | GGG | 290  | 2   |
| ATCAAAATGGACACGCCAAA  | 14776 | AGG | 21   | 1   |
| AAAAACCTGTATTAATAAA   | 5956  | CGG | 57   | 3   |
| AGAGCATGGTCAGAACAAGT  | 25082 | AGG | 486  | 6   |
| TTTACTCAAGAAAAATGGAG  | 20639 | TGG | 359  | 88  |
| CATGCAAGTTTTAGGTGTTT  | 25738 | TGG | 312  | 91  |
| TTATCAGATTTAAAAATCGT  | 31277 | TGG | 127  | 30  |
| ATGGATTTATTCAGCTGTAT  | 30283 | TGG | 216  | 7   |
| ATAAACGAATTTGGCAAAGA  | 11552 | TGG | 171  | 47  |
| TGGAACCTGCAATTGACGC   | 21657 | AGG | 1419 | 389 |
| TAATAAACTTTAGAACAAC   | 27615 | CGG | 332  | 88  |
| CCGAACCTATTCCGTTGCCA  | 34635 | GGG | 276  | 63  |
| AGAGCACCATTATAGTGCC   | 31087 | AGG | 1825 | 49  |
| ACGCATGTAATGGTCATGTG  | 9148  | TGG | 97   | 22  |
| TATGAAACAGGGGTCCAAC   | 11363 | AGG | 89   | 1   |
| GGCGTTATTCCAGCAGAACA  | 19595 | AGG | 329  | 48  |
| CAAAAAATCAAGCAGAAAAA  | 38198 | TGG | 3    | 1   |
| TTAAAGTGATTTAAAACTG   | 6190  | AGG | 120  | 11  |
| ACTAATGGCGTTGCGCAACC  | 38545 | TGG | 1399 | 341 |
| TTTGAGTGGTTACGTCAAAA  | 2324  | CGG | 28   | 17  |
| AGATATGACTGTGAGGTAA   | 11295 | AGG | 269  | 70  |

|                       |       |     |      |     |
|-----------------------|-------|-----|------|-----|
| TCATCTAAATCATAAGTAAC  | 16561 | AGG | 713  | 297 |
| CGAAAGTTATTGGGATTAGG  | 7650  | GGG | 61   | 16  |
| AGATATGCTGGGTTCTGTAT  | 30949 | TGG | 383  | 58  |
| GGCGTTCAAGTGGTTCAGAC  | 15372 | AGG | 1231 | 118 |
| CAACGTTGCCGAAACCACAA  | 13942 | GGG | 107  | 13  |
| AATACACTTTACTTAATTAA  | 37391 | GGG | 217  | 57  |
| TTAAGTACTGCCATTATTGC  | 24334 | AGG | 1424 | 112 |
| TACACAGTAGCTAATGTAA   | 39406 | AGG | 164  | 3   |
| ATCAAATCAATTGGAACGAT  | 28973 | TGG | 365  | 81  |
| TCATCAAGTTGTACGTCTAA  | 12036 | CGG | 838  | 141 |
| TGGAGAAGAAAGCAAGTGCA  | 11496 | TGG | 163  | 39  |
| AAAAAGAGTACGTGGTGGCT  | 9541  | GGG | 946  | 160 |
| CAGCTTTTTACCGCAAAGT   | 38406 | TGG | 101  | 18  |
| TGGCGTATTTTGGGCTTTAA  | 25333 | TGG | 579  | 113 |
| GACGCAGGGTATTCGACTAA  | 14654 | AGG | 19   | 6   |
| TTGAACGCTGCAGGAAGATT  | 24785 | TGG | 272  | 68  |
| TAAATGCCTCTGCAATTAG   | 19861 | AGG | 172  | 9   |
| TGACACAACACAAACATCAG  | 27198 | GGG | 271  | 29  |
| TCTCCAGTATCAATTAAGT   | 13220 | AGG | 274  | 67  |
| TTGATACGAATGGTGATGTT  | 16731 | AGG | 133  | 30  |
| AAAAAGAACGGGTTAACTCC  | 9509  | TGG | 256  | 68  |
| TAAAGGTAGACCCTAATATT  | 35325 | TGG | 171  | 2   |
| ATTCTTAAGTTGTCTTTCAG  | 30455 | TGG | 367  | 23  |
| CGACTGCTTCATAATGTGCC  | 5644  | AGG | 219  | 86  |
| CTAAACCTGAACGATTAAGG  | 16255 | AGG | 112  | 54  |
| GAGAAAACATGTTGTTAAGT  | 23959 | TGG | 407  | 134 |
| CACATTGACTTACTAGAAAA  | 5280  | CGG | 38   | 12  |
| ATTTCTACCTGTGCTGTTTC  | 31124 | TGG | 304  | 14  |
| TCAAGTGATTTAGGAATATC  | 37684 | AGG | 97   | 24  |
| TGAATATCATAACAAGTTTG  | 25785 | TGG | 226  | 45  |
| ATAGATAGTTTTTTATTGTC  | 5315  | CGG | 223  | 22  |
| AACTGCCATTGTGATGAGGA  | 2564  | GGG | 313  | 124 |
| TTGTTCAAATTTGTGTCTCA  | 24845 | AGG | 920  | 102 |
| CCGAAAAAATCTCATACATG  | 35645 | GGG | 23   | 4   |
| TGCCTTGTCTTTTTTATAA   | 39365 | GGG | 34   | 1   |
| CAACAGACTTTTGCAGAAGC  | 28367 | GGG | 1128 | 288 |
| AACCAATGCTCGGGATGGTC  | 15530 | AGG | 914  | 194 |
| TTTAATCATGAAAGACATTA  | 19621 | TGG | 161  | 1   |
| AAAAAGCGCATCTCAACCGA  | 37312 | CGG | 541  | 165 |
| TCCAAAGCCCCTTGTAAATAA | 23060 | CGG | 449  | 113 |
| GTATTGTTGTACCACTCATA  | 29337 | GGG | 841  | 5   |
| CTTTTTGGCAGTAAATTTGA  | 7567  | GGG | 3    | 3   |
| ACTAAAAATTGATGTGCAGA  | 31426 | CGG | 132  | 41  |
| ACAACATTAATAATTAATGA  | 22794 | CGG | 38   | 1   |
| CAGTGCCTTGTAATATGATT  | 29157 | AGG | 232  | 48  |

|                      |       |     |      |     |
|----------------------|-------|-----|------|-----|
| GCATTCCTCGCTAGTTTAGA | 14879 | TGG | 159  | 44  |
| AAAACCAACGTTTAATGATT | 4198  | GGG | 113  | 16  |
| AGAAACATTCTCTAAAACCT | 6733  | GGG | 24   | 3   |
| AAGTCACGTTGTAGTGGAAC | 15498 | TGG | 1389 | 267 |
| GCGAATGTAGTTGACTCAGA | 33175 | CGG | 342  | 87  |
| TAAATCAAGTGGGTGTGTT  | 18412 | GGG | 83   | 1   |
| TATAAATAATTTTCGTTCTA | 30111 | GGG | 57   | 33  |
| TGATTGGTTACACGGTTATT | 29200 | GGG | 89   | 15  |
| TGTGGATTCTCGGTTTGATA | 34169 | GGG | 150  | 30  |
| CTACCATACTTTGAAAGTGT | 27250 | CGG | 263  | 55  |
| CAGTCTTGTCGGTTACAAAG | 20547 | AGG | 255  | 47  |
| ACCTAGATTACATTTGTTTA | 36406 | TGG | 171  | 35  |
| CATTAACCTTTTTATGTGT  | 33761 | GGG | 336  | 36  |
| AACTAATCAAGAATTACAG  | 39453 | GGG | 165  | 32  |
| GCACGTTACGGTATCTTACA | 20255 | AGG | 306  | 34  |
| AAAATAGAATAGTTTGTGTA | 33054 | CGG | 313  | 28  |
| TAAATCTGACGCACTTTGT  | 33535 | TGG | 862  | 230 |
| TCCTAATGAACATAAATCAA | 32994 | CGG | 75   | 3   |
| ATGATGCAGGTATCTTATAT | 30618 | TGG | 51   | 11  |
| GCAAAAGCAGTCAAAGCTAA | 8092  | AGG | 23   | 4   |
| ATATAAATAATTTTCGTTCT | 30112 | AGG | 41   | 8   |
| AGCAGTATTTTTCATAGAGG | 21694 | TGG | 118  | 35  |
| ATGCTTTTAGTTCTTTAGAT | 28776 | GGG | 110  | 17  |
| AGTGCTAACAATTCATGTTC | 23296 | AGG | 121  | 31  |
| GTAGCTCCTGCACAAGATGT | 14490 | AGG | 105  | 44  |
| AGGGATAAATATAAATAAAG | 36215 | AGG | 64   | 6   |
| TGACGTTAATCTGGAAAGAT | 10686 | GGG | 143  | 32  |
| GACGGCTAATGATGATGTAG | 13736 | AGG | 247  | 39  |
| GGCAGAGCAATGTCACAAGC | 18258 | TGG | 413  | 93  |
| AACGTTGCCGAAACCACAAG | 13943 | GGG | 29   | 9   |
| GCATTCTCTGTCGCAGGTCT | 24416 | TGG | 264  | 85  |
| GCCAACCCTAACTACTTACA | 30662 | AGG | 211  | 54  |
| TTTAATTCTGACGAGTTTAA | 17285 | CGG | 350  | 58  |
| GAGTTTATTCGAGGGAAAGG | 31498 | TGG | 84   | 17  |
| AGTAAATATAGAAAAGCAAC | 38090 | AGG | 228  | 53  |
| TCATACTTAATTGAATTGTC | 27063 | TGG | 413  | 9   |
| AATCTATCAACTAAGGATGT | 19287 | TGG | 232  | 24  |
| ACAAGTGCTAATTAACCTGA | 17521 | AGG | 639  | 114 |
| ACTAGATGCTTTCACTAAAA | 29968 | AGG | 145  | 10  |
| CTAAAGCTACTGTGAAGCT  | 23937 | TGG | 52   | 13  |
| GTTGTCTCAAATGTAGGTGA | 26264 | CGG | 252  | 19  |
| CGATAATTTGAGCGACTGCT | 25275 | GGG | 481  | 34  |
| TTATGTTAGCGACAGGCGAA | 38300 | AGG | 381  | 72  |
| AATTTTATTAAAAAGTCTAC | 27736 | AGG | 210  | 29  |
| CCAGCTACCAAACCACTAT  | 39267 | AGG | 136  | 22  |

|                       |       |     |      |     |
|-----------------------|-------|-----|------|-----|
| TTATCCAGTGTTATAAGTGT  | 21489 | CGG | 356  | 12  |
| TTATTTCAACAAATGAATGG  | 6473  | TGG | 202  | 86  |
| ACCGAATATGGCCAAAAGCG  | 23165 | AGG | 107  | 31  |
| CGCACGATATAGAAGTAATA  | 26777 | AGG | 124  | 24  |
| GCAGCTTCAAACCACTCTTT  | 22556 | CGG | 233  | 44  |
| TTCCTAAAAGCTGGATTGTA  | 29485 | TGG | 291  | 72  |
| ACCTTGTAAGTAGTTAGGGT  | 30647 | TGG | 576  | 56  |
| TCAACTCGCATGATTATTTT  | 9209  | TGG | 166  | 30  |
| TTGAAACAAAGGTTATATAGT | 12992 | TGG | 107  | 17  |
| CTTTTTAATAAAAATTGGCAT | 27712 | AGG | 212  | 44  |
| CGGATTAGTACCTGCAATAA  | 24340 | TGG | 126  | 13  |
| ACAAGACAATGCCCTATGAG  | 29342 | TGG | 345  | 67  |
| TAAAGACGATAGAGAGAGAA  | 16363 | TGG | 116  | 25  |
| AGGCACAGGGCGATGAAAAT  | 8521  | AGG | 33   | 6   |
| GAGATTAAGTCACGTTGTAG  | 15492 | TGG | 629  | 78  |
| GCGATTCATGGTAAGCCTAT  | 39268 | AGG | 217  | 69  |
| ATGCACTTTTCGGACTGTTA  | 18887 | GGG | 649  | 212 |
| TAAAGTAGTGCTACTTGTTT  | 33214 | TGG | 358  | 76  |
| TGTAAAGTCCATTGAAGAAA  | 19476 | TGG | 434  | 101 |
| GCACCAGCAAGTATATATTG  | 15236 | AGG | 100  | 2   |
| CACTAAGTCGTTATATCCTA  | 28601 | TGG | 176  | 4   |
| CGTATTGATAATACAGGTTA  | 29903 | TGG | 180  | 3   |
| TCAACAACCAATGCTCGGGA  | 15535 | TGG | 656  | 150 |
| AGAGGGAGAGTCGCTCGTAC  | 23125 | TGG | 1109 | 138 |
| TTTTTGGCAGTAAATTTGAG  | 7568  | GGG | 6    | 2   |
| TCACAACCTGCCATTGTGATG | 2568  | AGG | 118  | 7   |
| TAAGTTTATTGATGATTGGG  | 15926 | TGG | 624  | 33  |
| CGTAACTATTCTGATATAGA  | 26890 | GGG | 327  | 20  |
| TTACTAAGCATGGCACGATA  | 22078 | CGG | 122  | 8   |
| CCTACTATTATGCAGTTAAT  | 25154 | CGG | 95   | 2   |
| ACAATAACAGAAGCTTGGAA  | 25592 | CGG | 115  | 14  |
| GTAAGAAACTTATTTACGA   | 37444 | AGG | 191  | 14  |
| CACAAATGATTTAGGGTAGG  | 38158 | TGG | 119  | 29  |
| TAAGTAGCCACTGTGTATAT  | 13350 | AGG | 459  | 99  |
| CATGTTATTTGGCGTTCAAG  | 15362 | TGG | 259  | 78  |
| AAAGTAAAAGTTAAGACGAT  | 13564 | TGG | 190  | 29  |
| TAGTAAACCTGTCTATATCA  | 22045 | GGG | 521  | 35  |
| TAAGAATTATCTTAAGACGT  | 14304 | GGG | 712  | 79  |
| TTAAGAACTCTTTTGATAA   | 19804 | CGG | 85   | 12  |
| GAGTGGGCAAAGTCGAATAT  | 34433 | TGG | 33   | 1   |
| AATCGAACGCTTTCAATGTT  | 26027 | TGG | 47   | 16  |
| GCTACAAGCATAATTTTTTT  | 38703 | AGG | 27   | 9   |
| CCAGCAAAGTATTCTTTGAT  | 15791 | AGG | 466  | 105 |
| TCGTTTGTAGGCAATCTATC  | 27306 | AGG | 675  | 65  |
| AGAGGATAGCTCTTTATTAA  | 26522 | AGG | 52   | 9   |

|                       |       |     |     |     |
|-----------------------|-------|-----|-----|-----|
| ATACGTGGTATGACATCGTT  | 15423 | TGG | 499 | 74  |
| TATTTTTGAGTAATCGTGTA  | 23240 | AGG | 352 | 54  |
| TTAATTAAGTTATCGATATC  | 9098  | CGG | 232 | 47  |
| GATTTTAGGATATAGCTTCT  | 34271 | GGG | 153 | 12  |
| CAGGCGCCAAGCTATTTAT   | 18435 | TGG | 116 | 1   |
| AAAGGAACGCTCGACGGACA  | 35813 | AGG | 95  | 10  |
| CTTTAATAGGGGTAACAT    | 30821 | TGG | 284 | 5   |
| AGAGTTATTACAAATACAAA  | 11907 | AGG | 70  | 25  |
| GTATTACGAAAGCGTGGACG  | 8888  | AGG | 38  | 12  |
| TAACTTTATTTTAGAGGAGA  | 10294 | TGG | 51  | 4   |
| GGACACACCGCAATAGTAGT  | 34676 | AGG | 100 | 2   |
| TCAGTTGTATGAAAATATAA  | 12618 | GGG | 124 | 18  |
| GGACGCAAAGCGCTTTAAT   | 30809 | AGG | 187 | 20  |
| AAAGGCGAACCGGGACAACC  | 36791 | TGG | 202 | 13  |
| TGAATAAACCTACTATGATT  | 25845 | TGG | 228 | 28  |
| ATGACCCGCGTCACCCTAAT  | 35175 | TGG | 349 | 122 |
| AACATCTCAAGAAGGGAAAT  | 38035 | GGG | 105 | 6   |
| ATCGAAAGGAGGTTAGCCTT  | 23593 | TGG | 159 | 1   |
| AATATGATTCTAGGCCATAA  | 29852 | CGG | 186 | 2   |
| GCCGTTATTACAAGGGGCTT  | 23075 | TGG | 148 | 12  |
| CTCCGCCACCATACTTTGAC  | 38426 | GGG | 631 | 183 |
| TTCCCGTTAGCATCAAATAA  | 20128 | TGG | 153 | 17  |
| TGGCGTTGCGCAACCTGGTT  | 38550 | GGG | 276 | 12  |
| CTTAATTTAGGCAAGTATCA  | 35753 | AGG | 29  | 11  |
| TATAAACAAATCGGCTTAAA  | 36179 | AGG | 112 | 11  |
| ATTTTATTAATAAAGTCTACA | 27737 | GGG | 88  | 9   |
| TAACCGACACTTTCAAAGTA  | 27237 | TGG | 397 | 52  |
| CTAGCCAATTAGGGTGACGC  | 35163 | GGG | 310 | 61  |
| ACCGTTGATTTATGTTCAAT  | 32979 | AGG | 84  | 41  |
| TGAAGCATTTCAAAGAAAAT  | 1938  | AGG | 1   | 1   |
| ATACGCACTAGCACTTATAA  | 11646 | CGG | 132 | 64  |
| ATAATTTTGTAATATTCTTA  | 31242 | GGG | 76  | 18  |
| TCCGAACCTATTCCGTTGCC  | 34636 | AGG | 294 | 56  |
| AGATGGCACGGAAGATATTA  | 8654  | AGG | 40  | 17  |
| GGGAGAAAAGGAGCAATGCC  | 22899 | AGG | 260 | 36  |
| CGTTTGCTAAAAATAAAGGT  | 36003 | TGG | 11  | 4   |
| AACACAAAGAAGTACATCAA  | 13391 | GGG | 84  | 1   |
| GAAACGAGAATAAAAAATGA  | 36266 | TGG | 7   | 4   |
| GAACGGGTTAACTCCTGGAA  | 9514  | TGG | 75  | 16  |
| CGACTAAAGGAGGCAACCAA  | 29611 | TGG | 321 | 24  |
| ATATCAGTATTTTGATGATG  | 9319  | TGG | 3   | 1   |
| GAATTTAAAGTCAAGAAGTA  | 20837 | TGG | 229 | 33  |
| CGATTCTATCGTTATTCATC  | 34592 | TGG | 121 | 41  |
| CTATTTTAGGGTTAGCTTCT  | 28551 | GGG | 80  | 28  |
| TACCTGTGTTACGCGGTAT   | 17096 | GGG | 298 | 100 |

|                       |       |     |      |     |
|-----------------------|-------|-----|------|-----|
| TGTAGGCGATTCTGTAGATC  | 21229 | AGG | 1336 | 435 |
| TCTTAGGATTCCATCTAATT  | 36090 | CGG | 49   | 2   |
| AACAATTTATTTGAGTATGA  | 21191 | GGG | 118  | 14  |
| GTTTTTCGTCTGATGGAGTA  | 35535 | GGG | 392  | 4   |
| ACTTTCAAAGTATGGTAGTT  | 27229 | CGG | 386  | 113 |
| AGAAAGGATTACATCAATAA  | 36068 | AGG | 67   | 12  |
| GAGCGTAATAAACGTGCAGA  | 22419 | CGG | 169  | 41  |
| AAAAGCTGAAGAAAATAACG  | 5075  | GGG | 79   | 12  |
| CTGATGTTTGTGTCAATAAT  | 31578 | TGG | 115  | 24  |
| AAAGCGTAAAGGGTACAAC   | 17428 | TGG | 194  | 1   |
| TCATTTAGATGGGGAATCAG  | 18374 | TGG | 463  | 29  |
| GCAACATGGTTTGAATACG   | 10259 | AGG | 52   | 18  |
| CTTCCTTAGATATGACTGTG  | 11288 | AGG | 65   | 1   |
| AAAAGGTGTAGGCGCCTACT  | 19717 | GGG | 286  | 11  |
| TTATTGAAGGCGCATCAAAA  | 6761  | GGG | 81   | 17  |
| ACAGTTATTAATAACTATT   | 39690 | TGG | 42   | 6   |
| TTATCTAGATTGAAGCCAA   | 30182 | CGG | 437  | 88  |
| TGCAAACCCCGCTAAAATGG  | 23989 | CGG | 253  | 68  |
| GGCGTTGCGCAACCTGGTTG  | 38551 | GGG | 50   | 14  |
| TCATAAGTGATACCTTGCAT  | 30583 | AGG | 160  | 27  |
| GTAGAACTTATGCAAAGTAC  | 11052 | AGG | 205  | 56  |
| GTGAATGATAGTGCGACAAA  | 32062 | AGG | 530  | 105 |
| GGACATGAAGTTGCATTATA  | 38848 | CGG | 231  | 5   |
| CCTAACAAACAAAGAGATGAT | 16985 | AGG | 247  | 52  |
| TTTTTCAATATCAACTATGA  | 10484 | AGG | 171  | 33  |
| TGCAAGAGGTGGCGCAACAA  | 29080 | TGG | 187  | 37  |
| AAGTAACTATCGGGTGTAG   | 16067 | AGG | 200  | 13  |
| AATTTTGCTACATTAATTAT  | 39660 | AGG | 1    | 1   |
| AAGTAGCTGAACAATCAAAA  | 14763 | TGG | 50   | 3   |
| GTTGACTCAGACGGCAACGG  | 33184 | TGG | 895  | 205 |
| CTACCTGTATTACGAAAGCG  | 8894  | TGG | 1    | 1   |
| GTGTCTGTTGATGACGTTAA  | 19024 | AGG | 106  | 19  |
| TACTACACCTTGAATCGCAC  | 25616 | CGG | 1170 | 122 |
| AAGCCTGTAACACTTACATA  | 34774 | AGG | 78   | 15  |
| GCAGTCATTGGTGTATTCAT  | 25526 | TGG | 58   | 3   |
| AGTTGTTGGCTTTGGTGCAA  | 24439 | TGG | 257  | 31  |
| AAACTTACCAATAAGATCAT  | 4908  | TGG | 273  | 47  |
| ATTGGAAGTATCAAAAAAGT  | 21014 | AGG | 113  | 42  |
| ATTTGCCACATTTTAGTGTC  | 36871 | AGG | 385  | 149 |
| GCAAGTATATATTATGATGA  | 13718 | CGG | 186  | 48  |
| AACTATCGCTTGTTAGATGA  | 29699 | AGG | 687  | 194 |
| ACAAAGCGTTCTTGTATAAT  | 21028 | TGG | 49   | 11  |
| AATGGCAGTTGTGACGTGGA  | 2593  | AGG | 26   | 10  |
| GAGCTTTCCTTACGTTGCTT  | 23643 | TGG | 166  | 22  |
| TTAGCAAATAGTTGTTCTAT  | 17735 | TGG | 591  | 170 |

|                       |       |     |      |     |
|-----------------------|-------|-----|------|-----|
| TTTGCCGATTAATTCCGCTC  | 26324 | CGG | 457  | 15  |
| ATCTATTAGTTTACATAGAA  | 22678 | TGG | 105  | 24  |
| CTTATATTGGGTTAAATCAC  | 38946 | AGG | 397  | 35  |
| GCGTGTTTGATAACCTTTTT  | 36487 | AGG | 250  | 1   |
| AAGGTAATTCAACAACAAAT  | 32258 | TGG | 118  | 26  |
| GAAATGTACGAGATGGAAGG  | 10559 | AGG | 32   | 11  |
| GACTACTTTGTGCGCAGCAT  | 26363 | TGG | 511  | 116 |
| TGATGAGGAACTTCGCGGAA  | 33575 | TGG | 586  | 204 |
| GGCTTATTGGTGGTCAGGAT  | 23358 | AGG | 261  | 37  |
| AGATCGAGTCAAGGAGTTTT  | 12421 | TGG | 36   | 4   |
| TGAATCATCACATTTATTGG  | 11327 | AGG | 164  | 20  |
| TTTATAGCGTTGACCAAAAC  | 34719 | TGG | 81   | 2   |
| TTTTCAATATCAACTATGAA  | 10483 | GGG | 133  | 36  |
| TATTGGGCAGGCGTACCGAT  | 29216 | AGG | 186  | 17  |
| TTTAATATCAGTTGTTACAA  | 39    | AGG | 69   | 1   |
| ATTATCGACGATGTTGTAAG  | 36461 | AGG | 52   | 22  |
| GGTAGAATCTTTAGTATTGT  | 21212 | AGG | 181  | 1   |
| AATGAATTTTTAAAACATTC  | 31819 | AGG | 195  | 38  |
| TTAACAACTAGTTGATGAT   | 21790 | AGG | 84   | 21  |
| CACAAATTATTTTTAGATA   | 27700 | AGG | 68   | 19  |
| GTCAAGCGCCACAGCCATTT  | 21637 | TGG | 106  | 2   |
| TAGTAGCCATTAATGCCGAA  | 20016 | AGG | 757  | 40  |
| TCCATAAACAAATGTAATCT  | 36391 | AGG | 93   | 10  |
| GGCTATTAGCGCTCTAAAA   | 24460 | TGG | 195  | 50  |
| AGCTGGACTTGATAGCGCAA  | 18275 | TGG | 316  | 83  |
| TCTAGTAATTTACTAGCTAT  | 25204 | AGG | 74   | 33  |
| TAATACACTTTACTTAATTA  | 37390 | AGG | 63   | 9   |
| GGTATGTGGGTGTCTGGTGA  | 15720 | CGG | 1661 | 106 |
| CAGCGACGAAAAGAAAATCA  | 8732  | TGG | 15   | 1   |
| TTAACAAATTGGTAATGTGCC | 22329 | TGG | 145  | 37  |
| AATGCCGGAGCGGAATTAAT  | 26336 | CGG | 107  | 18  |
| CTGAATAGGAGGAGATATGA  | 20445 | TGG | 102  | 24  |
| GACGAAAGTTATTGGGATTA  | 7648  | GGG | 56   | 12  |
| TCAAGTTGTCTATAAATATG  | 11840 | AGG | 64   | 5   |
| GTTTACATTCAATGACAGGT  | 29652 | CGG | 147  | 1   |
| TCTGATATAGAGGGTATTGA  | 26899 | TGG | 486  | 167 |
| GGTTTACCATCATACAAGGA  | 40368 | TGG | 92   | 46  |
| TAAACTTTTGAAATCTAAAA  | 725   | TGG | 21   | 1   |
| GCTACTAAAATCCGAATTTT  | 24248 | CGG | 16   | 2   |
| AATTTAGGTTCAAGTGATTT  | 37675 | AGG | 43   | 3   |
| TTCTTTATGATAATATGGAT  | 16126 | AGG | 140  | 37  |
| TTGCCTTGTTCTTTTTTATA  | 39366 | AGG | 42   | 8   |
| TTTAGAACGATAAAAAGAAAG | 6907  | TGG | 67   | 5   |
| ACCAATGCTCGGGATGGTCA  | 15529 | GGG | 160  | 25  |
| AACGGTAAAGGTTGGACTAA  | 38530 | TGG | 171  | 34  |

|                       |       |     |      |     |
|-----------------------|-------|-----|------|-----|
| ACCTCGTGACCTTTTTTCGTT | 29533 | AGG | 36   | 7   |
| TATGCAATATACGTTGAATA  | 21519 | CGG | 260  | 100 |
| TCTATCAATAAATTGTCCGT  | 30182 | TGG | 233  | 2   |
| CTATCAATAAATTGTCCGTT  | 30181 | GGG | 112  | 25  |
| ATAACAATTGCTTGTTGGTC  | 12249 | GGG | 457  | 10  |
| ACAAGGTATTATGAGTGGAG  | 18152 | AGG | 307  | 70  |
| GGTACTGGTATATATGCTAC  | 21540 | TGG | 26   | 10  |
| TTAGTTAGAACTTTGGTAC   | 31460 | TGG | 494  | 124 |
| CTCAACCGACGGTTAAAATT  | 37323 | TGG | 29   | 14  |
| AAGTTATGAGGGTTATTTAT  | 32862 | CGG | 102  | 25  |
| GTTAGCACTAATGGGTGATT  | 20227 | GGG | 459  | 139 |
| AAGAGTCAGTGCTTCGGCAC  | 34328 | TGG | 131  | 29  |
| GGTCAAACTGGAACGGTAA   | 38518 | AGG | 24   | 13  |
| ACAGTTTCAGGACCCCAACC  | 38547 | AGG | 487  | 125 |
| GCTTTACTAAGAACTATTTT  | 34216 | TGG | 45   | 5   |
| TCTATTGTGTTAATAGGACG  | 15858 | AGG | 96   | 9   |
| TGAAGCAGTAGGGATTATGA  | 11816 | CGG | 104  | 8   |
| ATATCGCTGAGAAAAATAAA  | 3882  | AGG | 19   | 4   |
| ATCTTCGCGCAACAGGTCAA  | 24275 | AGG | 71   | 11  |
| CTAATTTTGTTAGCAGTATT  | 26082 | TGG | 84   | 1   |
| CCACACTATTAGCCCAATTT  | 24876 | TGG | 87   | 38  |
| GAAATCAACAGAATTATTGA  | 1024  | CGG | 41   | 6   |
| ATTGACGCTTTGCAAGAAGT  | 16919 | TGG | 284  | 29  |
| AATTTCTGTCCGCAAACGC   | 31220 | CGG | 1242 | 33  |
| GGATTTAACTAGAATAACTG  | 25432 | GGG | 46   | 7   |
| CATATCGCCTATATACACAG  | 13359 | TGG | 125  | 24  |
| ACAGCAATAGAGTACGTACA  | 7990  | AGG | 83   | 16  |
| TATTCGACTAAAGGTAAGAG  | 14663 | TGG | 20   | 8   |
| AAAGACTTTAAAGGTATTGC  | 31352 | AGG | 427  | 31  |
| GAAACTCATAGATGAGGCAC  | 8507  | AGG | 356  | 36  |
| ACTGGATAGACAAATGTCTA  | 35617 | GGG | 37   | 10  |
| TTTCTTTTCGTGCTGAAAT   | 8709  | GGG | 2    | 1   |
| AGCCCAATTTTGAAAGCTA   | 24866 | TGG | 108  | 9   |
| AGTTAGTACAGAAGATTTTG  | 37174 | AGG | 9    | 1   |
| TAGCTCCTGCACAAGATGTA  | 14491 | GGG | 68   | 18  |
| TTAGGTAAAACATCAGGTTT  | 33280 | TGG | 355  | 131 |
| CGTATTGTTGTACCACTCAT  | 29338 | AGG | 142  | 27  |
| AAAGTAATTGCTACAGACTT  | 26510 | TGG | 88   | 18  |
| AGCTTTTAGGAAAGCGAGCA  | 29512 | TGG | 127  | 37  |
| AGGCCTTTGAAGAATATGAG  | 14796 | TGG | 123  | 17  |
| AGCGTTGGCAATAAAGCTAA  | 38653 | AGG | 161  | 62  |
| ATTATCGGGGCAGTCAATGT  | 34476 | TGG | 175  | 29  |
| GAGGCCATGTATCTGACTGT  | 40047 | TGG | 73   | 14  |
| ATAAGTGCTAGTGCGTATAA  | 11667 | CGG | 140  | 29  |
| CAATATTAGAAAATAAAGTG  | 19509 | AGG | 51   | 14  |



|                      |       |     |      |      |
|----------------------|-------|-----|------|------|
| TAGCTTAGGTAAAGGTTTAG | 26476 | CGG | 177  | 26   |
| CCCTGGCAACGGAATAGGTT | 34651 | CGG | 51   | 1    |
| GGTACTAATCCGGCAATCAC | 24313 | TGG | 621  | 81   |
| AGATAGTTTAAAAAAGCAA  | 28477 | TGG | 189  | 16   |
| CTTGCTCTTTTGGTTCAAT  | 30024 | CGG | 46   | 18   |
| AAAACGACTAATCTTGCAAG | 29066 | AGG | 201  | 55   |
| ACTGCATACGGTGTTAATGT | 38905 | AGG | 765  | 145  |
| ATTATGAGAAAAGAAGTAAA | 24158 | TGG | 18   | 1    |
| CAACTGCCATTGTGATGAGG | 2565  | AGG | 140  | 36   |
| AGTGGTATAGGAGCTATACG | 15408 | TGG | 302  | 17   |
| GACGGTGCATATTGTATTA  | 39505 | TGG | 99   | 35   |
| TTTTTAATTTAACACAAAGT | 33916 | AGG | 65   | 7    |
| TCAACTTTAGTAATCCTTCA | 37736 | GGG | 146  | 17   |
| AACCTGGAGACATCGCAGTT | 34626 | TGG | 73   | 10   |
| AGTTCGGATTTTAGTAGCTA | 24227 | AGG | 250  | 65   |
| GGAAAAACGGAAAACCGAAA | 7246  | AGG | 3    | 3    |
| TTGAAACTGGTGAAATGTA  | 16467 | AGG | 89   | 4    |
| GCCAGGCAATGTTATTTTAT | 19561 | CGG | 13   | 6    |
| ATACCTTGTTACGCGGTA   | 17095 | TGG | 124  | 1    |
| AAAGAATGGTCATGAGGATA | 9990  | TGG | 96   | 27   |
| CCTAAGATTGGTCAGATATT | 24965 | TGG | 94   | 1    |
| TAACCTTATCCACATAAAGG | 6707  | TGG | 41   | 12   |
| CTTTAACCGCCATTTTAGCG | 23979 | GGG | 36   | 14   |
| ATTATTTAGTGTACTTTTT  | 13049 | CGG | 13   | 3    |
| AGGCTTACCATGAATCGCAC | 39247 | CGG | 6156 | 1340 |
| ACAATGGCAACAGTTCCAAT | 29096 | AGG | 105  | 26   |
| TTTCAATATCAACTATGAAG | 10482 | GGG | 259  | 100  |
| GCGATGTCAGCAGGTATCAG | 24599 | AGG | 212  | 2    |
| TGCATTACTGCATTTGTATA | 30073 | TGG | 163  | 27   |
| CGGTGCTAGCTTCGTAAGAA | 36052 | AGG | 2    | 2    |
| ATCTTTGCTTTATTATCAA  | 38334 | CGG | 69   | 10   |
| TGGAGTGTGGCTGAAAAAAT | 26138 | GGG | 60   | 9    |
| ACAGTTGAATACGAAAAATT | 22605 | CGG | 15   | 2    |
| CAAAGTCGAATATTGGTAAG | 34440 | AGG | 416  | 34   |
| ATACTGCTTGACTATCGATA | 22021 | CGG | 103  | 11   |
| GCTTCAATTCCTTTATCTCC | 22331 | AGG | 427  | 67   |
| AGGCTCAATAAAATGTTGAA | 5832  | AGG | 92   | 29   |
| AAAACCTGGGAACTTGTCTT | 6720  | TGG | 448  | 156  |
| TGGTTACACGGTTATTGGGC | 29204 | AGG | 214  | 17   |
| TCCGAAAATGGCATTTCGGT | 7173  | TGG | 95   | 17   |
| ACTAATTTACAGAAATGTT  | 29027 | AGG | 42   | 2    |
| GCAACAATGAGAGAAACAGT | 21894 | CGG | 311  | 25   |
| AAAACGGATTATCGGCAAAC | 7211  | GGG | 142  | 12   |
| AAACATCCAGTGACATGCTT | 39870 | GGG | 448  | 161  |
| ATATATGCTACTGGTCCTGG | 21549 | TGG | 264  | 16   |

|                      |       |     |      |     |
|----------------------|-------|-----|------|-----|
| GCGAGTACGTTTGACGCAAT | 27845 | AGG | 75   | 11  |
| AGTCACAGGTGTAATGCTTG | 33892 | AGG | 51   | 2   |
| CCTTGCAATATTAATGATTT | 8013  | TGG | 23   | 4   |
| ACCGTTAAAGAATGGTCATG | 9984  | AGG | 41   | 4   |
| AACCGCAACTGTGTAATATG | 5622  | CGG | 52   | 10  |
| CGTGTACGTTAGAGAATGAC | 40347 | CGG | 623  | 166 |
| GTGTCGTACACTTATAACGA | 20865 | TGG | 65   | 17  |
| GGAATATCAGGAGTCAATAG | 37696 | CGG | 27   | 2   |
| ATCGGTGTTATCGGTATTTT | 25310 | AGG | 177  | 25  |
| ATCAATATCGCAAATGTTGA | 36959 | AGG | 344  | 35  |
| TTCTGGGCGTGCTTCTGGTT | 34287 | TGG | 48   | 7   |
| CTACAAACGAAGGTGATAAG | 27335 | AGG | 151  | 17  |
| AATATTGCCTAAGCATATTG | 16324 | AGG | 136  | 25  |
| AATGAATTGATAAAAAAGAA | 9497  | CGG | 20   | 5   |
| GCAACAACATAAGATGACAG | 32727 | AGG | 241  | 82  |
| TCAACTAGTTTGTTAATGTT | 21767 | AGG | 42   | 1   |
| GTTGTAGCTTTTCTAGCTTT | 1646  | AGG | 74   | 15  |
| GGCTTGAGAGAGCAAATAAA | 13999 | AGG | 25   | 8   |
| TCTCTATCGACATATAAATG | 35104 | CGG | 28   | 6   |
| AGAGAACTTGTATTGAACAA | 12980 | AGG | 40   | 21  |
| AGAAGTAAAAGATTATCTAA | 18990 | AGG | 25   | 4   |
| AAAATCTCATACATGGGGCT | 35650 | GGG | 124  | 21  |
| TATTTTAGGTGGCGTATTTT | 25324 | GGG | 172  | 16  |
| AACCGGTTTTATATCCAGGC | 27632 | TGG | 448  | 56  |
| GTCCGCAAACGCCGGTTAT  | 31227 | TGG | 46   | 21  |
| CAGTCGTGTTGCTTGGAGTG | 26125 | TGG | 129  | 45  |
| CAAGGTATCACTTATGATGC | 30605 | AGG | 144  | 6   |
| TACTGCCAAAAAGTGTTTC  | 7542  | TGG | 36   | 3   |
| GACTTTTCATCTTTTGCCTC | 33857 | TGG | 116  | 9   |
| AATTAAGTGGTACGTAGACA | 33803 | TGG | 34   | 2   |
| ACTAGCCAATTAGGGTGACG | 35164 | CGG | 64   | 17  |
| TTATCCACGAGTCATGCAAG | 5782  | TGG | 217  | 32  |
| AACTGATTAAACTGTGTTAA | 27399 | AGG | 57   | 16  |
| TTTGAAGCATTGAATAGCAT | 24740 | AGG | 263  | 75  |
| AAGCTCATTTTAAGCGCGAT | 21963 | AGG | 1915 | 310 |
| TCAATATCGCAAATGTTGAA | 36960 | GGG | 133  | 25  |
| AAAAGGTATCTACTTCACAA | 36196 | GGG | 295  | 34  |
| ACTTTAAAGGTATTGCAGGT | 31356 | TGG | 396  | 68  |
| GTTGGTGGTACTATGATTTT | 2793  | TGG | 86   | 22  |
| TCACACTTATTGAGGAGCAT | 12817 | GGG | 52   | 7   |
| TGAACTATATAGCCGGGCAG | 40028 | AGG | 14   | 4   |
| AAAAGATTATGGCTTATATT | 38934 | GGG | 50   | 13  |
| GATAGATTGCCTACAAACGA | 27325 | AGG | 188  | 25  |
| AACGATAAAAACGAAGTTAT | 33366 | CGG | 140  | 5   |
| ACAGCAAATGGACAATAAA  | 37579 | TGG | 34   | 2   |

|                       |       |     |      |     |
|-----------------------|-------|-----|------|-----|
| ATAGGGGTAAC TATTGGACC | 30827 | TGG | 118  | 15  |
| TTCGCGAGTAAAGTAGCTGA  | 26231 | TGG | 2    | 1   |
| GACTATTACTGTTACAAAGA  | 20508 | AGG | 197  | 47  |
| TCCTCGCTTTTGGCCATATT  | 23150 | CGG | 79   | 25  |
| TCACTTACTACCTGCCTATA  | 14405 | TGG | 85   | 25  |
| ATTGAAATGAGGTGCATACA  | 34363 | TGG | 233  | 19  |
| GTGCCTATATCCGTCTTTTC  | 32388 | TGG | 1103 | 175 |
| TATGCACTTTTCGGACTGTT  | 18886 | AGG | 87   | 25  |
| GATGATGAGGATTCTGAAAT  | 16664 | AGG | 32   | 2   |
| CTGTAGGCTTTCTAGTCTTT  | 34380 | GGG | 54   | 15  |
| AGGAGACTTCCAAGAAGCTG  | 30757 | AGG | 24   | 4   |
| TGTTTACCCATATATTGTTG  | 21839 | TGG | 310  | 112 |
| GTTGGCGCATTCTCTGTCCG  | 24410 | AGG | 83   | 20  |
| AGTCGTTTTAAAATTATTCAA | 37792 | TGG | 2    | 1   |
| ATACTCCACTAATGTAATCA  | 20875 | GGG | 71   | 1   |
| TATTGGGGTTTTGTAACATG  | 34526 | GGG | 64   | 7   |
| TATCTGACTGTTGGTCCCAC  | 40056 | AGG | 326  | 99  |
| CAATGAATGTTAAGCGAATA  | 35703 | TGG | 128  | 4   |
| TTTGACAAGTATGTTCAAAA  | 19381 | AGG | 39   | 2   |
| ACGACTAATCTTGCAAGAGG  | 29069 | TGG | 178  | 36  |
| ATACAAGCTAGGTAAAAGT   | 13537 | AGG | 17   | 4   |
| TAAAGTGAGGTAATAAAAATA | 19522 | TGG | 3    | 1   |
| GCAGTTTGGCACCCCTGGCAA | 34640 | CGG | 70   | 6   |
| TTTGAGCTTGATTATGTTGA  | 27136 | TGG | 393  | 46  |
| AGGAAAGCGAGCATGGAGGA  | 29519 | CGG | 484  | 135 |
| ATGATTGGTTACACGGTTAT  | 29199 | TGG | 48   | 7   |
| ATTGAAAATGATTTAGTTAG  | 31918 | TGG | 144  | 8   |
| ATCACCATAACCTTTAATAA  | 28319 | AGG | 610  | 46  |
| AACTTCGCTAATGGTAGATA  | 35924 | CGG | 88   | 17  |
| ACGATAGTAGACGCAATTA   | 31774 | TGG | 14   | 6   |
| TAAAAAGTCTACAGGGTGTA  | 27744 | GGG | 40   | 9   |
| ACAGGAGAGGTAGACAAGGC  | 39580 | AGG | 434  | 27  |
| AGAGAATTACAAGGAAATCA  | 23225 | TGG | 53   | 9   |
| TACGGATATCACTGTTCCCTA | 25817 | TGG | 86   | 23  |
| ATAAGAAAAACAACGGAGCA  | 31197 | TGG | 78   | 16  |
| GATAATTTTGTAAATATTCTT | 31243 | AGG | 14   | 4   |
| GGTTAAACCTCTAATTGCAG  | 19870 | AGG | 976  | 162 |
| TGTAACATGGGGCAATGCTA  | 34537 | AGG | 70   | 15  |
| AACTTTGGTACTGGTGGCGT  | 31469 | TGG | 142  | 9   |
| TTTGTGCTAGGACTCATAGA  | 14606 | GGG | 13   | 3   |
| CTACGTTCAATAAATGTGAA  | 14455 | AGG | 41   | 13  |
| GGTTTTTCGTCTGATGGAGT  | 35536 | AGG | 76   | 12  |
| ACTGGGTTAATTCTAATAGT  | 34737 | TGG | 145  | 16  |
| AAAATCGGAAGGTTTCCGGA  | 14721 | AGG | 58   | 2   |
| CGCACGCAAGTTTGAGGATT  | 24688 | GGG | 47   | 9   |

|                       |       |     |     |     |
|-----------------------|-------|-----|-----|-----|
| ATCAACGGTATGTGGGTGTC  | 15714 | TGG | 83  | 1   |
| AAAGAAGATTTTAAAAGTGG  | 16457 | TGG | 45  | 19  |
| GTATCTGAAGTGATTCCAT   | 30556 | AGG | 63  | 5   |
| TCGAAACCTTGTAAGTAGTT  | 30652 | AGG | 48  | 28  |
| TGCGCACAAAGTAGTCAGCG  | 26386 | CGG | 18  | 6   |
| TGTTTTGTTAGTTTTTCAGTT | 33669 | CGG | 159 | 43  |
| AAACTACCCACCATATAGGC  | 14399 | AGG | 305 | 39  |
| CATAAGATGACAGAGGCGAA  | 32734 | TGG | 171 | 63  |
| GGAGACCTAATCATATTACA  | 29168 | AGG | 52  | 11  |
| GTAATATCACTTAGATATGC  | 30961 | TGG | 243 | 73  |
| GATTGGTTAACTCAATTGTG  | 25655 | GGG | 33  | 8   |
| TGATGGAGTAGGGCCTCGTG  | 35525 | TGG | 45  | 4   |
| ATAAAAATGAGCAAATTAAG  | 33790 | TGG | 107 | 24  |
| TGGGTGTGCTTCGAATAGTT  | 25256 | TGG | 86  | 1   |
| CCCCTATCGTCAATATTA    | 8589  | AGG | 64  | 27  |
| GCTTAGTACAAGCTTCTAAG  | 23427 | AGG | 173 | 59  |
| ATACTCAAAGTAATCATTTT  | 11235 | CGG | 23  | 7   |
| GACTGGGGTTACGAGCACTA  | 15834 | TGG | 56  | 11  |
| TCGAGCAGTATTTTTTCATAG | 21691 | AGG | 36  | 4   |
| GAAAAATTCGGCGAAAAAGT  | 22617 | CGG | 5   | 3   |
| TTGTTAGGTACACCAAACAA  | 16954 | TGG | 123 | 38  |
| TTTATAAAAAAATTGAAAAG  | 22742 | AGG | 19  | 1   |
| ATGCCTATATTACAAGTATT  | 25706 | AGG | 28  | 4   |
| ATGCAGTAATGCAATCATTT  | 30099 | TGG | 40  | 3   |
| ACAAGGAAGATGTCTCCTGT  | 40055 | GGG | 216 | 19  |
| TAACAAAACAATACTGAGG   | 33698 | GGG | 75  | 25  |
| ATTGAACAAAGCACCGAATA  | 23153 | TGG | 19  | 4   |
| TTATTAATAACTATTTGGA   | 39694 | TGG | 161 | 47  |
| ACCCTGACCATCCCGAGCAT  | 15544 | TGG | 203 | 20  |
| CGTTAGCACTAATGGGTGAT  | 20226 | TGG | 30  | 4   |
| TTACTACCTGCCTATATGGT  | 14409 | GGG | 49  | 4   |
| AGTTTCTATGAATCAGATAG  | 31615 | AGG | 75  | 9   |
| GGAGCAGTTAAACGTTCTTT  | 24122 | CGG | 130 | 25  |
| TTTGTAACAACCTGATATTAA | 21    | AGG | 141 | 11  |
| TCTCAGAAGATAGCGAAGAT  | 22879 | GGG | 36  | 1   |
| CAAACCTAGGGTTAACTTG   | 29398 | AGG | 47  | 2   |
| TGGAGTTTTAAAGGTGATGA  | 21594 | CGG | 99  | 21  |
| GCTTAAACCAACTGAATAGG  | 20434 | AGG | 51  | 9   |
| GGAACAGCAGACGCAGGAAA  | 12379 | AGG | 54  | 12  |
| TGGGTAATAGACATCAAAAA  | 6015  | AGG | 15  | 1   |
| CCTGGTGCAAAAGGTGAAGC  | 36809 | AGG | 91  | 22  |
| GACGCGGTATTGATAATAC   | 29897 | AGG | 516 | 141 |
| CAAAAAGTGTTTCTGGTCTA  | 7535  | AGG | 37  | 9   |
| TGTAACTAATAGATCAAGG   | 22702 | GGG | 7   | 2   |
| AAATGATTCTGACATTGCAT  | 22287 | TGG | 254 | 119 |

|                       |       |     |      |     |
|-----------------------|-------|-----|------|-----|
| CGTTTTTTTTGGGGCAAAAAA | 40234 | AGG | 3    | 1   |
| TTAGCTATTGGTAAGTCGTA  | 21151 | AGG | 55   | 1   |
| AAAGATATTGTAAGTAGATA  | 15957 | TGG | 87   | 6   |
| ACTGCGATGTCTCCAGGTTTC | 34606 | CGG | 55   | 11  |
| ATCATTCTGATTGGTTATTT  | 17670 | TGG | 25   | 2   |
| ATTACACAAGGTATTATGAG  | 18147 | TGG | 32   | 1   |
| TTGATGACCTTAACAATTCT  | 28002 | AGG | 107  | 13  |
| ATTATTGAAGGCGCATCAAA  | 6762  | AGG | 22   | 2   |
| GTCAGTTGTATGAAAATATA  | 12617 | AGG | 11   | 2   |
| AATGGCGCTGACCTTGTTAA  | 32239 | AGG | 133  | 34  |
| AAACAAAACGGTATAAACAT  | 2288  | CGG | 8    | 2   |
| ATCGGATTCGTTAATACTGG  | 33384 | CGG | 118  | 4   |
| ACACGTGTTGGTTATTTACA  | 16550 | TGG | 69   | 12  |
| TTGAACTTGATGAAGCAGTA  | 11806 | GGG | 135  | 5   |
| TCATTTTATGGCAAAGATTA  | 23620 | TGG | 46   | 21  |
| TGATTTCTTAAATGCCGGAG  | 26326 | CGG | 32   | 8   |
| TAAAGTTACATTACAGCCCC  | 6035  | TGG | 163  | 45  |
| ACTGTTCTATGAAAGTTGCA  | 5488  | AGG | 21   | 2   |
| ATTGACTTTAAATATTTTCGA | 21462 | TGG | 54   | 12  |
| CAACGTCGTTATATAGCGAC  | 39562 | AGG | 67   | 1   |
| GATGAGCTTATTGGGGATAT  | 11447 | AGG | 60   | 4   |
| AAAGGTGATAAAGGCGAACC  | 36782 | GGG | 147  | 15  |
| AGTAGATTTAAAGGTGCGAA  | 36764 | AGG | 3    | 1   |
| GTTGAAGGCGCAGAAGAGAA  | 19973 | AGG | 9    | 5   |
| AGGTAGCGTTGAAAGTTATG  | 32850 | AGG | 103  | 20  |
| ATGGGGCAATGCTAAGGATA  | 34543 | TGG | 56   | 18  |
| GCAAGCGACTACAAAAAAG   | 38685 | AGG | 68   | 9   |
| GACGGTGGCGCAAATGGTGT  | 33025 | AGG | 85   | 26  |
| AGCCATACAATCCAGCTTTT  | 29499 | AGG | 57   | 10  |
| TCGCCTCTATATGTGTTTTTC | 2817  | TGG | 2861 | 648 |
| ATACTTTGCTGGTGTCGACT  | 15818 | GGG | 210  | 25  |
| GAAAGATTACGGCGAGAAAA  | 24217 | TGG | 8    | 4   |
| TTTAAATTCTTTTTAACTTC  | 20807 | AGG | 386  | 85  |
| AGGCATTCTTTACACAAAAC  | 31856 | GGG | 89   | 7   |
| GCAAACGTCATTGCATAATC  | 35971 | AGG | 114  | 54  |
| GTAGTTGACTCAGACGGCAA  | 33181 | CGG | 177  | 38  |
| GTAGCTGTCCAAATCATAGT  | 25853 | AGG | 50   | 10  |
| AAACGACGTATCGATATTGG  | 30716 | CGG | 97   | 37  |
| ATTACAGTTTTTACGACTAA  | 29598 | AGG | 114  | 17  |
| GACTTGAATCGATTCCAGCC  | 27630 | TGG | 146  | 40  |
| TTATCGGGGCGAGTCAATGTT | 34477 | GGG | 25   | 13  |
| TCCGCTCCAGTATAAGATAG  | 20167 | TGG | 85   | 7   |
| TTGCGATAGCGTATGCTAGG  | 8057  | TGG | 21   | 7   |
| GATTTAGTTAGTGGGTTTGA  | 31927 | TGG | 615  | 48  |
| ATATTTAAGATGGAAGTTGA  | 20685 | CGG | 72   | 10  |

|                        |       |     |     |    |
|------------------------|-------|-----|-----|----|
| GGTGTCACTACTTCTTTAAT   | 38104 | AGG | 17  | 1  |
| CCACTAGTTGAAGTGTTGTA   | 19924 | AGG | 179 | 48 |
| AATCTGGAAAGATGGGGAGT   | 10693 | TGG | 54  | 10 |
| CGGATATTTATTTTTAGGTA   | 37522 | AGG | 1   | 1  |
| GATAATCCGTTTTCCGAAAA   | 7185  | TGG | 59  | 2  |
| TTCCGCATATTACACAGTTG   | 5608  | CGG | 25  | 4  |
| TCCTTAATATTCGACGATAG   | 8574  | CGG | 83  | 22 |
| CAAGTGCTAATTAACCTGAA   | 17522 | GGG | 246 | 25 |
| CAACTAGTTTGTTAATGTTA   | 21766 | GGG | 27  | 7  |
| AATAGGTGATGTTGTTAGAG   | 28585 | TGG | 257 | 6  |
| TTAATCGGCAAAGTAGCTGA   | 26351 | GGG | 24  | 5  |
| GTATCGATGACTGATTCAGG   | 30926 | CGG | 191 | 38 |
| ACAATTGCGTTCCAAGCCAT   | 25817 | AGG | 35  | 1  |
| GAGCCTTTATTTATATGAAA   | 17984 | TGG | 60  | 12 |
| GTACTIONACCAGAAACAGCAC | 31133 | AGG | 146 | 53 |
| AAAGGTAATAATGTAAGAGA   | 39424 | CGG | 201 | 56 |
| TTGCTAGTATCTTTGAATA    | 34807 | TGG | 8   | 2  |
| GCATCTAAATTCGAGGGATT   | 28124 | AGG | 17  | 10 |
| ACGCAAAGCGCTTTAATAG    | 30811 | GGG | 65  | 12 |
| GTTAACTTAAATAATGCGCA   | 32770 | AGG | 83  | 12 |
| GAATATACAAAAGTATATGC   | 37471 | TGG | 877 | 70 |
| AATCAATTCTTAGCGAATAA   | 37925 | AGG | 33  | 3  |
| CTTCAATAACTAGCCAATTA   | 35172 | GGG | 9   | 1  |
| TGAGACACAAATTTGAACAA   | 24826 | CGG | 69  | 1  |
| TGGCACCTGGCAACGGAAT    | 34646 | AGG | 26  | 9  |
| TAAATACTTTCACATCATT    | 38497 | TGG | 84  | 10 |
| CTTAATGCGGTTGGTGTATT   | 24368 | AGG | 23  | 5  |
| GTTGCAAAAAGAGTACGTGG   | 9536  | TGG | 168 | 37 |
| AGCTAGTGAAGTGGTGGAGT   | 34417 | GGG | 89  | 20 |
| ATTCTAGGCCATAACGGCGA   | 29858 | CGG | 151 | 21 |
| TACTTTGCTGGTGTGCGACTG  | 15819 | GGG | 5   | 3  |
| TTAGTAAACCTGTCTATATC   | 22046 | AGG | 154 | 8  |
| CATTATTGCAGGTAATAATC   | 24323 | CGG | 27  | 8  |
| CCAAAATTGGGCTAATAGTG   | 24892 | TGG | 93  | 3  |
| TCCAAGTGATTATAAGTGAA   | 26814 | AGG | 119 | 12 |
| GCGCTTAACAAAATACTTAA   | 35789 | AGG | 69  | 39 |
| TCTGTAACCTCATTTCGTAAG  | 26438 | TGG | 13  | 5  |
| ACGCACGCAAGTTTGAGGAT   | 24687 | TGG | 23  | 13 |
| TCTATCTACGTTATAATCAT   | 31711 | CGG | 24  | 6  |
| AGACAAAGTATTGTATCAAA   | 30544 | TGG | 62  | 30 |
| ATTATGCTTGTAGCCGGTCA   | 38728 | TGG | 89  | 27 |
| AAGATAACTTGCCGAAAGAG   | 22561 | TGG | 114 | 42 |
| CAAAAGGTGTAGGCGCCTAC   | 19716 | TGG | 412 | 50 |
| TGGTAACTTTATTTTATTG    | 15887 | AGG | 20  | 4  |
| AGGATCGTTATAACCATGAC   | 38725 | CGG | 262 | 33 |

|                       |       |     |     |    |
|-----------------------|-------|-----|-----|----|
| TTCTTAGAGTTATTGAAGAA  | 14094 | AGG | 12  | 1  |
| GAATTCGTTGAACTTTGTTG  | 30490 | AGG | 37  | 4  |
| AAACGAAGGAGTGTATTTAA  | 22130 | TGG | 93  | 13 |
| TGGCGACTTCTCAGGTGCTT  | 25906 | GGG | 71  | 7  |
| GGATTCAATGTTATATTTAA  | 22920 | CGG | 88  | 36 |
| CTCTAAACGCTTTCGGTAAC  | 31038 | GGG | 17  | 1  |
| GTATAACCTGCTGGCACTGG  | 39324 | TGG | 47  | 5  |
| AGCGTCGTTAGCGCATGAAG  | 15461 | AGG | 88  | 19 |
| AAGGAAGTTGATTTAAAAGC  | 27532 | CGG | 110 | 9  |
| AGAAGTAAAATCGAATACAC  | 31384 | CGG | 76  | 18 |
| GCTCAAATTATCGGTGTTAT  | 25301 | CGG | 71  | 14 |
| TGGACGATCACTCATGTTGA  | 27884 | AGG | 352 | 10 |
| ATGGTTGCAAAAAGAGTACG  | 9533  | TGG | 30  | 10 |
| ACATGTCTTGTCACAGTTTC  | 38559 | AGG | 80  | 20 |
| TTGAATCGCGTTAGGTAATG  | 33127 | CGG | 16  | 5  |
| TATTATGTACGAGTTAATCA  | 29572 | AGG | 248 | 82 |
| CTATGTAAACTAATAGATCA  | 22699 | AGG | 65  | 1  |
| CATCACTCAATTTATTCCAT  | 30860 | CGG | 21  | 2  |
| TGCGCTTAAAACGCTATCTA  | 32320 | TGG | 26  | 3  |
| TAAAAATAACTTTTATTAGA  | 34684 | TGG | 24  | 5  |
| GTGGTGTTTGGTTATTGTCA  | 35274 | GGG | 63  | 11 |
| AATGGAACAAGTGATATTTG  | 24176 | GGG | 36  | 1  |
| TCTATGCTTGCAGTTTGGAA  | 10848 | CGG | 103 | 7  |
| TAACGCGCTAGGTAAAGCGC  | 19269 | AGG | 28  | 4  |
| GTGACGCGGGTCATCAAAAT  | 35150 | TGG | 20  | 3  |
| TCAACGCTACCTGGTAAATC  | 32823 | CGG | 249 | 79 |
| ATGGATCCTATTTTAGGTAA  | 6795  | AGG | 124 | 42 |
| TGTCCATAGCTTTCAAAAT   | 24879 | TGG | 1   | 1  |
| GGTTTTATTACAAAAGATGA  | 37500 | AGG | 202 | 30 |
| GTTGACAGTGCGTCCACACG  | 35528 | AGG | 55  | 23 |
| TAACTTCTCAATTTAGAGCA  | 25068 | TGG | 120 | 31 |
| GATAGATTGCTTGTTAAAAA  | 30215 | CGG | 24  | 8  |
| CAAGGCGCACCCGGTAAAAA  | 36845 | CGG | 41  | 3  |
| TTAAGCGTTGCGAACGCTTC  | 20401 | TGG | 113 | 8  |
| AAACCAACGTTTAATGATTG  | 4199  | GGG | 2   | 2  |
| ATGTTCTTTATGTTAGCGAC  | 38293 | AGG | 216 | 60 |
| ACCAGCTTTAATGTAATAAT  | 28247 | TGG | 50  | 23 |
| TTAGCTGACATGTTGGCGTT  | 12076 | TGG | 44  | 19 |
| GTGCTAACAATTCATGTTCA  | 23295 | GGG | 55  | 16 |
| GAAGTTTCAACTTATTATAA  | 26736 | GGG | 22  | 9  |
| ATCAACTTTAGTAATCCTTC  | 37735 | AGG | 134 | 35 |
| ACTGATGATGATTGGTTACA  | 29192 | CGG | 33  | 6  |
| GGAGATAAAAATAATCTTCGA | 27553 | CGG | 11  | 4  |
| ACTTCATTCGTAAGTGGACA  | 26444 | CGG | 96  | 7  |
| TTACAACATCGTCGATAATA  | 36441 | AGG | 285 | 96 |

|                       |       |     |     |     |
|-----------------------|-------|-----|-----|-----|
| GGAAAGCATATATTGACGCA  | 14640 | GGG | 39  | 4   |
| ATGACGTTTGCTAAAAATAA  | 35999 | AGG | 13  | 3   |
| GGTGTCCCTGATTACATTAG  | 20886 | TGG | 20  | 10  |
| ATCGCTATTGCGTTAGATTG  | 6828  | GGG | 13  | 6   |
| TCGTAAC TATTCTGATATAG | 26889 | AGG | 47  | 20  |
| ACAATAGTGGTTTTTTCAAG  | 23107 | AGG | 1   | 1   |
| TCTGGATTTGTACCGGAACC  | 34610 | TGG | 69  | 21  |
| AACAGATGCGCCAGAAAAGA  | 32394 | CGG | 3   | 1   |
| GGCGATTTTTCTTCCTAGTT  | 482   | CGG | 64  | 29  |
| GCTGTAGGCTTTCTAGTCTT  | 34381 | TGG | 34  | 9   |
| ATAGCTTCTGGGCGTGCTTC  | 34282 | TGG | 175 | 29  |
| AGGGGTCCAAGTAGGTGTAA  | 11371 | TGG | 85  | 34  |
| CAACACAAAGAAGTACATCA  | 13390 | AGG | 90  | 13  |
| CCCATGTATGAGATTTTTTC  | 35628 | GGG | 89  | 4   |
| ATTGAAGAATTTGATGATAA  | 4433  | CGG | 407 | 39  |
| AGGGATATGTTCCAATAAC   | 31223 | CGG | 66  | 11  |
| TAGGTTATTAATTGAAATTT  | 6291  | CGG | 1   | 1   |
| ACGAAAGTTATTGGGATTAG  | 7649  | GGG | 14  | 5   |
| TGACACCAATTTCTTCAGAA  | 757   | AGG | 10  | 8   |
| AGCAGTTTAAACGACATGCTA | 18841 | AGG | 40  | 10  |
| TCAATTATCGGCTTTTTAAC  | 25997 | TGG | 259 | 49  |
| AATGATGAAAGAGAATTACA  | 23216 | AGG | 18  | 1   |
| AATTGGGCTAATAGTGTGGC  | 24896 | TGG | 103 | 47  |
| AACGTAATATCAACGGTATG  | 15706 | TGG | 20  | 3   |
| GAATGTAACGATTAGAAATG  | 26662 | AGG | 29  | 11  |
| ATAGATGATATTGAAGCACA  | 16301 | AGG | 62  | 5   |
| CACGGTGGAGGTAGTAGCTT  | 26462 | AGG | 60  | 6   |
| GGATTTTAGGATATAGCTTC  | 34270 | TGG | 27  | 1   |
| TATGAATCAGATAGAGGAAC  | 31621 | TGG | 135 | 12  |
| TCTAATTGTTCTCGAGTTGG  | 22994 | TGG | 205 | 47  |
| AGACATAAAAAGAAAAACGA  | 22116 | AGG | 19  | 8   |
| TTTCAATGTTTGGTACAAGT  | 26037 | TGG | 77  | 3   |
| AGATGCAAACCCCGCTAAAA  | 23986 | TGG | 10  | 5   |
| ATCACACTTATTGAGGAGCA  | 12816 | TGG | 43  | 2   |
| AAACTTGGGAAGTTGTCTTT  | 6719  | GGG | 73  | 12  |
| ATACACTTTACTTAATTAAG  | 37392 | GGG | 24  | 17  |
| ATGAACGACACAAATGATTT  | 38150 | AGG | 1   | 1   |
| GAATATAACGTTACAGGCGC  | 26860 | AGG | 314 | 105 |
| GTAAGAATTATCTTAAGACG  | 14303 | TGG | 10  | 7   |
| TTACAAGCATCAGATGCTTC  | 20318 | TGG | 365 | 24  |
| CGAAACCTTGTAAGTAGTTA  | 30651 | GGG | 41  | 9   |
| AGATTGGGGGTGAATAATTA  | 6814  | TGG | 9   | 2   |
| GTAAGTGGAACTTATCCAGG  | 33097 | TGG | 6   | 5   |
| GTACAAGTTGGTCACAGATA  | 26049 | TGG | 46  | 17  |
| ATATACGTTGAATACGGTAC  | 21525 | TGG | 266 | 60  |



|                       |       |     |     |    |
|-----------------------|-------|-----|-----|----|
| AGATTGGTAACTCAATTGT   | 25654 | GGG | 153 | 19 |
| TTATCGCTATTGCGTTAGAT  | 6830  | TGG | 35  | 7  |
| AAAGATTTAATAAACGAATT  | 11543 | TGG | 18  | 4  |
| GTA CTGGTGGCGTTGGTAAA | 31476 | TGG | 57  | 1  |
| TGCGCCGACACTTATAACAC  | 21477 | TGG | 94  | 8  |
| GCGCCAGAAAAGACGGATAT  | 32401 | AGG | 28  | 17 |
| GTTAACACCTCTTTGGCCGA  | 30860 | TGG | 187 | 36 |
| CGTGGTGTTTGGTTATTGTC  | 35273 | AGG | 140 | 48 |
| TTACCTATCAATTGTGCTAA  | 28396 | TGG | 332 | 69 |
| TAAGGCTTGATATCAAAGCT  | 27969 | AGG | 11  | 1  |
| TCAGTCTGATTTGATGAGGG  | 13787 | CGG | 20  | 1  |
| AACAAAATACTTAAAGGAAA  | 35795 | AGG | 13  | 3  |
| GAAAGGTGATAAAGGCGAAC  | 36781 | CGG | 428 | 21 |
| GCAGGAGAAAAGCGCAAGTGG | 39004 | TGG | 24  | 7  |
| TTTAAATCAAGTGGGTGTGT  | 18411 | TGG | 108 | 16 |
| TCAACGGTATTGTTGACGG   | 33010 | TGG | 128 | 25 |
| TACTATGATTTGGACAGCTA  | 25835 | CGG | 23  | 9  |
| GGCGATTCTGTAGATCAGGG  | 21233 | CGG | 34  | 6  |
| TTAGCATATATTGATACGAA  | 16721 | TGG | 62  | 3  |
| GCATTTATATGTCGATAGAG  | 35122 | AGG | 131 | 8  |
| ACCACTATCTTATACTGGAG  | 20182 | CGG | 91  | 17 |
| AAATGTTATACCTTTATTAA  | 28325 | AGG | 122 | 4  |
| CTCTACCTTATTGATTTAAA  | 20927 | CGG | 75  | 7  |
| GGGATTACTAAAAGAGATTG  | 11702 | AGG | 17  | 4  |
| AATGGTTACGAGTATAAAGA  | 7816  | CGG | 35  | 4  |
| AATAATGCGCAAGGCGATTT  | 32779 | GGG | 15  | 5  |
| AAATCAATCGCAACAGAGAT  | 14054 | TGG | 23  | 13 |
| CCAAACGGCACGAACATGAA  | 33959 | TGG | 70  | 15 |
| GCGATGCGATTTTCATCAGCT | 26412 | TGG | 16  | 3  |
| TTATTCATCTGGATTTGTAC  | 34603 | CGG | 315 | 80 |
| GGAGACTTCCAAGAAGCTGA  | 30758 | GGG | 50  | 11 |
| CCGGGACAACCTGGTGCAAA  | 36800 | AGG | 243 | 14 |
| CATACAAAAGAAAATGAAA   | 12338 | AGG | 31  | 11 |
| GCAGGTAAAAAAGGAGAACA  | 36827 | AGG | 12  | 6  |
| GATAATTTCTTTATAGGGAA  | 7351  | TGG | 12  | 1  |
| GCTGATAAAAGTAACTATC   | 16059 | GGG | 238 | 26 |
| GATAAATCAGTGATAAATTC  | 30049 | CGG | 216 | 50 |
| TTTATGTTATAGCTAGCCTT  | 39803 | CGG | 8   | 1  |
| AATGGTTGAAGATGGAACAT  | 24478 | TGG | 99  | 13 |
| TAATAACCTAGTAAGGTTAG  | 6262  | GGG | 54  | 3  |
| CGATGCGATTTTCATCAGCTT | 26413 | GGG | 9   | 2  |
| ATGTACGTAGCGGTATAATG  | 37640 | AGG | 16  | 1  |
| GCAATGGTTGCTAAAGATAA  | 18291 | CGG | 30  | 6  |
| ACCGATAGGCACTGATAAAA  | 29230 | CGG | 17  | 11 |
| CCGACGGTTAAAATTTGGAC  | 37328 | AGG | 296 | 51 |

|                       |       |     |     |    |
|-----------------------|-------|-----|-----|----|
| ATGTCGATAGAGAGGCTACA  | 35130 | TGG | 41  | 1  |
| CGAAGATAGTACCGAAAGTT  | 24243 | CGG | 24  | 1  |
| GTACTIONCTGGACACTATAA | 31097 | TGG | 18  | 9  |
| AAACAATTTATTTGAGTATG  | 21190 | AGG | 2   | 1  |
| TTGATATTGATTCCAGCAGA  | 24057 | TGG | 30  | 5  |
| AAAACCTGGAACGGTAAAGGT | 38522 | TGG | 49  | 11 |
| TTAGAGAAGCCTGGACAAGA  | 32428 | TGG | 65  | 11 |
| AAAGCAAAGATTGAAAAATA  | 38362 | TGG | 42  | 9  |
| GATACATTGATGGAGAATTA  | 30264 | TGG | 11  | 4  |
| TTTTGTGCAAAGTACGAATG  | 10797 | AGG | 12  | 3  |
| ACACGGACAAAAACAACTA   | 29385 | GGG | 10  | 3  |
| GTGCAATGTTTTTTAAGAAT  | 30882 | TGG | 64  | 10 |
| CACCTGCTGAATGGCGTGAT  | 23337 | TGG | 19  | 1  |
| TCAACTAATTCAAGAATTAC  | 39451 | AGG | 64  | 7  |
| GGGAAACAATTCAACCCAGA  | 38236 | TGG | 184 | 24 |
| CGGACTGTTAGGGTACGCGA  | 18897 | AGG | 21  | 2  |
| ATCACTAGTATTTTTGAATC  | 29296 | TGG | 413 | 43 |
| AGACATATTAGATCGAGTCA  | 12412 | AGG | 43  | 9  |
| GCGACAGGCGAAAGGCTGCA  | 38308 | AGG | 24  | 1  |
| TTAAGTTTCATTCCAATGAT  | 17299 | AGG | 17  | 1  |
| TTGCAAGGTTCCATACGGAAC | 8044  | TGG | 68  | 24 |
| CCTATAGGTGGTTTGGTAGC  | 39283 | TGG | 122 | 18 |
| AATTCCGGTTCTTGCTCTTT  | 30034 | TGG | 25  | 12 |
| GATATTGATGAGTATATCGA  | 17706 | GGG | 20  | 8  |
| CTAGTATCTTTTGAATATGG  | 34804 | AGG | 61  | 9  |
| GATCCTGGAGCAGTAGGAAA  | 38758 | CGG | 7   | 3  |
| GTCTGATTTGATGAGGGCGG  | 13790 | AGG | 311 | 62 |
| CATTTCTTTGTCCTCGCTTT  | 23160 | TGG | 75  | 11 |
| GCAGGGTTCCAAAATGGCTG  | 21629 | TGG | 8   | 1  |
| CATGCCATAAGGTGCGTTTA  | 9560  | AGG | 84  | 2  |
| TGATTTTCATCACTGAAAACG | 23045 | AGG | 8   | 2  |
| AATGTAACGATTAGAAATGA  | 26663 | GGG | 66  | 11 |
| TTACTATGCAACAAGAGTGC  | 32820 | CGG | 133 | 1  |
| ACATTA AAACTTTTTATGTG | 33760 | TGG | 17  | 4  |
| TACTTTGTTAACAAGTTTTT  | 2501  | AGG | 572 | 97 |
| AATGCTTTTAGTTCTTTAGA  | 28777 | TGG | 37  | 7  |
| GAATCAAGATTTTAGGTTGG  | 7467  | AGG | 5   | 2  |
| GAAAAAGACATTTGATACAG  | 10214 | CGG | 13  | 12 |
| ACAGGTCACAGTAAAGTAAG  | 15390 | TGG | 19  | 1  |
| ATGTAAACTAATAGATCAAG  | 22701 | GGG | 11  | 5  |
| TGGCGTGATTGGCTTATTGG  | 23348 | TGG | 14  | 1  |
| TGATTGGCTTATTGGTGGTC  | 23353 | AGG | 49  | 1  |
| GCCTACAGCTAGTGAAGTGG  | 34411 | TGG | 48  | 4  |
| AGCATATCTAAGTGATATTA  | 30979 | CGG | 159 | 7  |
| TATTATGTATTTGAGGAGA   | 16895 | AGG | 84  | 7  |

|                        |       |     |      |     |
|------------------------|-------|-----|------|-----|
| TGGCTAGTTATTGAAGTATG   | 35195 | TGG | 7    | 2   |
| GTTACTATAACTAAAATTAT   | 33319 | GGG | 20   | 5   |
| AATGGCGCTTATTACTTTCA   | 10164 | CGG | 7    | 4   |
| AAAGGTGCGAAAGGTGATAA   | 36773 | AGG | 81   | 45  |
| ACCATGCTTAAAGGGATTTT   | 34257 | AGG | 16   | 1   |
| CAATACTGTCTTTAAAGGAA   | 28069 | CGG | 64   | 17  |
| ATAGGTATCAATGACAAACA   | 36353 | AGG | 40   | 22  |
| GTATCAAATGGATATACCTA   | 30556 | TGG | 37   | 8   |
| TAAATGGGCGCGAGAAAATC   | 10366 | CGG | 11   | 1   |
| AAACTTTTACTCAAGAAAAA   | 20634 | TGG | 18   | 7   |
| GATACTCATCGTCATTTAGA   | 18363 | TGG | 165  | 13  |
| GGACCTAGAAGAGAAAATTG   | 6598  | TGG | 44   | 9   |
| ACAGTTTTTACGACTAAAGG   | 29601 | AGG | 17   | 1   |
| TCAATCCTGACACTAAAATG   | 36882 | TGG | 33   | 3   |
| GTTTTAGGTGTTTTGGTAAT   | 25745 | AGG | 14   | 4   |
| TGTGGTTTTGTTGGTTGTAG   | 40161 | GGG | 66   | 12  |
| TACCTACAAGATACCTAAAA   | 36490 | AGG | 9    | 1   |
| TTGGTATTCTTGTTTATTTA   | 25545 | TGG | 1    | 1   |
| TCAGTTTGGGAGTCAATTAT   | 25985 | CGG | 6    | 1   |
| GGACAAGATGGTGTGATGA    | 32440 | CGG | 32   | 8   |
| ATGTGGATTCTCGGTTTGAT   | 34168 | AGG | 76   | 1   |
| GTCGCAGGTCTTGGAGTTGT   | 24425 | TGG | 157  | 23  |
| TGGTAAATGGAGTTTATTCG   | 31489 | AGG | 22   | 6   |
| GATATTGGGGTTTTGTAACA   | 34524 | TGG | 40   | 11  |
| GGAGATTTATTGAACGCTGC   | 24776 | AGG | 210  | 50  |
| GAAACTAAAAATTAATTA     | 4599  | AGG | 12   | 4   |
| TTACTTGAGTTTTCCCCTTG   | 13940 | TGG | 8    | 2   |
| AAAATTAATAACTATTTTCAGG | 12663 | TGG | 43   | 10  |
| GCTCCGCCACCATACTTTGA   | 38427 | CGG | 35   | 18  |
| TGATAGCATGGTTGTTGAAT   | 21320 | TGG | 32   | 1   |
| GAATCAGTCATCGATACTTG   | 30904 | AGG | 123  | 35  |
| TTGCTTACTGGCGACTTCTC   | 25898 | AGG | 58   | 1   |
| ATAGGCACGTTAGAGAAGCC   | 32419 | TGG | 41   | 10  |
| AATAGGATCTGTGGTTTTGT   | 40170 | TGG | 231  | 51  |
| CAAGGTATTATGAGTGGAGA   | 18153 | GGG | 36   | 4   |
| GATTATTTAACGTATTTAAA   | 29819 | TGG | 33   | 4   |
| TCGATAAGAAAATAGAAGAG   | 21349 | TGG | 21   | 2   |
| AACTTTTTTAGGTATCTTGT   | 36476 | AGG | 44   | 17  |
| CAACATCTCAAGAAGGGAAA   | 38034 | TGG | 5    | 2   |
| CACTGGTGAAAAATATCCAG   | 33857 | AGG | 7    | 1   |
| TTCGACTAAAGGTAAGAGTG   | 14665 | GGG | 25   | 1   |
| GAAAGAATGACGAGTTTTAA   | 12729 | TGG | 1502 | 233 |
| AATACTGTCTTTAAAGGAAC   | 28070 | GGG | 275  | 106 |
| CTGGCGACTTCTCAGGTGCT   | 25905 | TGG | 53   | 2   |
| AGATTGCTTGTTAAAAACGG   | 30218 | CGG | 45   | 6   |

|                        |       |     |     |    |
|------------------------|-------|-----|-----|----|
| GATAGCGAAGATGGGAGAAA   | 22887 | AGG | 9   | 1  |
| AAAATCATTAATTTTCTAC    | 30415 | CGG | 72  | 25 |
| CGAACCAAAAGAGCAAGAAC   | 30046 | CGG | 44  | 7  |
| TGTAGACTTTTTAATAAAAT   | 27718 | TGG | 31  | 8  |
| GATTCCAGCAGATGGAAATT   | 24065 | AGG | 2   | 2  |
| GAACAAGTAGGACAATCACA   | 25094 | AGG | 2   | 2  |
| TTGGCGACTCTGTAGCTAGA   | 28992 | GGG | 143 | 42 |
| CTAAGTGATATTACGGAAGT   | 30986 | TGG | 15  | 5  |
| ACGGCAGACTTGAGCAACAG   | 32966 | TGG | 57  | 18 |
| ATGGCAGTACTTAATGCGGT   | 24359 | TGG | 29  | 1  |
| TTCACTTTCTATACAGATAA   | 27493 | AGG | 15  | 4  |
| AGTGCTGACGATATTGATAA   | 30518 | AGG | 69  | 39 |
| ACTTCAATAACTAGCCAATT   | 35173 | AGG | 6   | 5  |
| TATGTAAACTAATAGATCAA   | 22700 | GGG | 8   | 1  |
| GTAGGAGTGA ACTATATAGC  | 40021 | CGG | 30  | 2  |
| TTAATAGCCGGTGCGATTCA   | 39256 | TGG | 21  | 3  |
| GGGACCAACAGTCAGATACA   | 40035 | TGG | 15  | 3  |
| ATTTATTCCATCGGCCAAAG   | 30869 | AGG | 18  | 3  |
| GGTCTTGGAGTTGTTGGCTT   | 24431 | TGG | 30  | 3  |
| TAATAGTTGGACAGGTTCTC   | 34750 | CGG | 129 | 27 |
| AGTGGCATTGTTGTTACTGCAA | 25195 | TGG | 14  | 3  |
| TCACGTTCAAATAATGATAC   | 20329 | TGG | 83  | 11 |
| ATCTCCAGCAAAGCAATCA    | 36028 | TGG | 9   | 7  |
| CAATAGTGGTTTTTTCAAGA   | 23108 | GGG | 19  | 3  |
| ATACTTGCTGGTGCAACATT   | 15261 | AGG | 26  | 11 |
| ACTTAAGGAGGAACAACAAA   | 942   | TGG | 64  | 4  |
| AGGTGATTACCATGCTTAAA   | 34249 | GGG | 214 | 8  |
| TGCGTCAGATTTAAGTGATG   | 33560 | AGG | 45  | 24 |
| AGTTACTATAACTAAAATTA   | 33318 | TGG | 16  | 3  |
| CCCTAACGAAAAGGTCACG    | 29548 | AGG | 34  | 3  |
| ATAGAAGAGTGGGTAAAAA    | 21360 | AGG | 19  | 3  |
| TTTTAGGAAAGCGAGCATGG   | 29515 | AGG | 58  | 9  |
| TTCAACCCAGATGGTTGGTA   | 38245 | TGG | 9   | 1  |
| ATTTTCGGAAAACGGATTAT   | 7203  | CGG | 8   | 1  |
| GTATTTTAGGTGGCGTATTT   | 25323 | TGG | 38  | 10 |
| TAATCCTGCAGAAGATATTA   | 20469 | AGG | 18  | 3  |
| AAAAGAGTTGTCTCAAATGT   | 26258 | AGG | 12  | 4  |
| AGGTGATGTTGTTAGAGTGG   | 28588 | TGG | 44  | 1  |
| CAATGGACTTTACATTTGAA   | 19451 | GGG | 11  | 8  |
| CTAGAATCATATTGCTAAAA   | 29826 | CGG | 13  | 1  |
| CCTCGTGACCTTTTTCGTTA   | 29532 | GGG | 33  | 1  |
| ATGTATTACGATCTAGAAAC   | 30788 | AGG | 98  | 3  |
| ATCAGTTACGTTCAAGAGAA   | 25130 | TGG | 40  | 13 |
| GCAGCAGGAGAAAGCGCAAG   | 39001 | TGG | 27  | 1  |
| GTAGATGCATCTAAATTCGA   | 28118 | GGG | 6   | 1  |

|                       |       |     |     |    |
|-----------------------|-------|-----|-----|----|
| TCAGGTACCGACCATTTTTTC | 27288 | AGG | 11  | 2  |
| AAAGCCTACAGCTAGTGAAG  | 34408 | TGG | 5   | 1  |
| GGCTTACACCCTAACGAAAA  | 29540 | AGG | 23  | 5  |
| ATACTCATCGTCATTTAGAT  | 18364 | GGG | 5   | 3  |
| GCAGTTTCCGGTGCGATTCA  | 25625 | AGG | 4   | 3  |
| AATATTCAAGAAAAAGAAAA  | 1835  | TGG | 1   | 1  |
| CTGCAAGTTTTTGGATAAAT  | 8536  | AGG | 2   | 1  |
| AAAGGAAAAGGAACGCTCGA  | 35807 | CGG | 96  | 12 |
| TCAATTGCAGGGTTCCAAAA  | 21635 | TGG | 19  | 5  |
| ATATACGCGATATGAAAATG  | 34151 | TGG | 57  | 25 |
| TAATGATGGAAGTATATTGT  | 7326  | CGG | 41  | 9  |
| GGTAAATGGAGTTTATTCGA  | 31490 | GGG | 13  | 1  |
| GTTTCAACTTATTATAAGGG  | 26739 | AGG | 225 | 35 |
| AGAGTGGTGGATTCTGCCAT  | 28601 | AGG | 23  | 15 |
| TTAATAACCTAGTAAGGTTA  | 6263  | GGG | 9   | 8  |
| TACACGATTACTCAAAAATA  | 23259 | AGG | 8   | 3  |
| GCCAATTATTACATTAAGC   | 28262 | TGG | 85  | 26 |
| GTTTTCGGAAAACGGAAAAA  | 7233  | CGG | 23  | 6  |
| GTAAGCGATAAAACAATTAA  | 21065 | AGG | 10  | 1  |
| GAAGAATATGCATTGATCAC  | 33840 | TGG | 291 | 50 |
| TTCCAGCCTGGATATAAAAC  | 27618 | CGG | 23  | 13 |
| TAAACTTAAATCTTTATATA  | 15068 | CGG | 52  | 11 |
| GGATATTTATTTTTAGGTAA  | 37521 | GGG | 20  | 10 |
| TGCTGGACGTTTTTATTTAA  | 27036 | GGG | 2   | 1  |
| ATCGATGAGAACATCTAATG  | 14318 | TGG | 16  | 8  |
| GCTGGGTTCTGTATTGGTAA  | 30943 | CGG | 15  | 3  |
| CCAGCAGTCGCTCAAATTAT  | 25292 | CGG | 6   | 3  |
| AGTGACCTAAAACGATTCAA  | 8760  | AGG | 41  | 10 |
| TTTAACTAGAATAACTGGGG  | 25435 | TGG | 27  | 1  |
| TACACTTTTTAAAAATCGGA  | 14710 | AGG | 3   | 1  |
| CAATTTTTAGTTAGAACTT   | 31454 | TGG | 27  | 2  |
| TGATCAGAAAGCATAAAAAA  | 3041  | TGG | 42  | 8  |
| AGACCATTATTTGATGCTAA  | 20141 | CGG | 14  | 4  |
| TCCTAAATTAATAGGATCTG  | 40179 | TGG | 13  | 1  |
| TTAAAAAGTCTACAGGGTGT  | 27743 | AGG | 5   | 2  |
| TTAAAAAGCGTTTTAGCGCT  | 1902  | TGG | 7   | 3  |
| AAACACGCTGTACAAACAGG  | 22374 | TGG | 24  | 1  |
| CTAAAGCTAAGAGTAATCAA  | 12509 | AGG | 41  | 10 |
| TTTTAGTCGTTTTTTTTATTT | 37834 | TGG | 4   | 1  |
| CCCGAAAAAATCTCATACAT  | 35644 | GGG | 2   | 1  |
| ACTTTATTTTTAAAAGATAT  | 34509 | TGG | 8   | 3  |
| CATAGAGGTGGTTAAATATG  | 21706 | TGG | 1   | 1  |
| ATTGGCGACTCTGTAGCTAG  | 28991 | AGG | 33  | 1  |
| GCGGTTGGTGTATTAGGTGG  | 24374 | TGG | 21  | 3  |
| AAATTTACTTACTTAGCAAA  | 19700 | AGG | 70  | 5  |

|                       |       |     |      |      |
|-----------------------|-------|-----|------|------|
| CAGGTGGACAGTTGCGTATA  | 22390 | TGG | 7    | 2    |
| ATGTCTTACTTAACAAAAA   | 6219  | AGG | 4    | 1    |
| GAAAACGGATTATCGGCAA   | 7210  | CGG | 4    | 2    |
| GATGATAGGAGATGCTGAAA  | 16999 | AGG | 17   | 7    |
| AGACAAGCAGAGCAAATAAG  | 29147 | AGG | 329  | 48   |
| GCTCTTAAAATGGTTGAAGA  | 24470 | TGG | 2    | 2    |
| AGTAGATGCATCTAAATTCG  | 28117 | AGG | 1    | 1    |
| ATTCATGGTAAGCCTATAGG  | 39271 | TGG | 107  | 6    |
| GAACTATTTTTGGTATTTAA  | 34226 | AGG | 38   | 20   |
| GACACGGACAAAAACAACT   | 29384 | AGG | 11   | 1    |
| AGCATAGGTGGCGCAATCTT  | 24755 | CGG | 4    | 3    |
| GCGCACGCTTTCTTAGAAAG  | 35891 | TGG | 99   | 12   |
| AATACAGCATCTATAAGAAT  | 36335 | AGG | 44   | 11   |
| AAAAATCTCATACATGGGGC  | 35649 | TGG | 20   | 1    |
| GAGGAGGTAGAACATGACTG  | 3805  | AGG | 8    | 2    |
| CTTAGTCATGAAATGGTAGG  | 3576  | AGG | 6    | 1    |
| TAACCAATTAAAGCAAATA   | 32013 | TGG | 8    | 1    |
| AATGTTGAAAGGAGAGAAAA  | 5843  | AGG | 5    | 3    |
| CAGGCATTCTTTACACAAAA  | 31855 | CGG | 1    | 1    |
| CACTACAGCATGGTCAATTG  | 3164  | CGG | 30   | 1    |
| GTAATAACGACCCTGAAAAA  | 27293 | TGG | 3    | 1    |
| AATGTTATGAATATCATACA  | 25778 | AGG | 24   | 4    |
| GCTAAGTTATATAAACAAAT  | 36170 | CGG | 15   | 5    |
| GGTAGCGTTGAAAGTTATGA  | 32851 | GGG | 10   | 1    |
| ATTGAACTTGATGAAGCAGT  | 11805 | AGG | 157  | 13   |
| CCGTTTTATAAAAAGAATGA  | 32611 | TGG | 34   | 13   |
| AGTGCTTGCTGGAATGTGAA  | 35581 | TGG | 19   | 1    |
| CTATTTTTGGTATTTAAAGG  | 34229 | AGG | 1    | 1    |
| TTTTAGTTCTTTAGATGGGT  | 28772 | CGG | 58   | 1    |
| AAATTCCTTGAATCGAAAGG  | 23582 | AGG | 5    | 1    |
| GCTAACCTCCTTTGATTCA   | 23571 | AGG | 3    | 2    |
| TGGAAATCATATTTATACGG  | 4814  | CGG | 26   | 2    |
| TTAAAGGTGATGACGGCGAA  | 21601 | TGG | 4    | 1    |
| TTAGCTGACTTACAAGAAGG  | 22221 | TGG | 5    | 2    |
| GGAGGTAGTAGCTTAGGTAA  | 26468 | AGG | 4    | 1    |
| AAAGAAATCGTTAGCACTAA  | 20218 | TGG | 76   | 20   |
| AAAGAATTC AATGAAGTCGA | 24101 | AGG | 17   | 4    |
| ATATTGGGGTTTTGTAACAT  | 34525 | GGG | 18   | 1    |
| ATACTTTGCCGTTATTACAA  | 23068 | GGG | 17   | 1    |
| AAACGATTCAAAGGCGCTCA  | 8769  | CGG | 4    | 1    |
| CTGGATTTAACTAGAATAAC  | 25430 | TGG | 7    | 3    |
| GAGTATAACGAAAGTTTTAC  | 28034 | AGG | 4857 | 1139 |
| GTACGTTTTCCAATATAGAAC | 30329 | TGG | 71   | 7    |
| AAGATAAAGCGTTATTATAT  | 5590  | TGG | 17   | 12   |
| ATTTTCAATAAGAAAAACAA  | 31190 | CGG | 3    | 2    |

|                       |           |     |    |
|-----------------------|-----------|-----|----|
| GGATCACGTGAATGTTTTTG  | 9712 TGG  | 275 | 98 |
| TTTGTTATTACAGGTCATGA  | 4292 AGG  | 43  | 12 |
| AATGCGTATAGATACATTGA  | 30254 TGG | 6   | 1  |
| AGTTCCAATAGGTAAAGAAG  | 29107 CGG | 3   | 1  |
| AAGCATAGAGGTGCAAAAAG  | 10878 TGG | 1   | 1  |
| TTGTTGACGGTGGCGCAA    | 33019 TGG | 3   | 1  |
| TTCCAATAGAAATAGTGTGA  | 20982 GGG | 115 | 34 |
| CGAGTACACTTTTTAAAAAT  | 14706 CGG | 24  | 1  |
| TATGGATCTATTGTGTTAAT  | 15852 AGG | 21  | 3  |
| TAACAACTAGTTGATGATA   | 21791 GGG | 19  | 13 |
| GGAAGTGTAGGGTACGCGAA  | 18898 GGG | 5   | 1  |
| TTCTCAGAAGATAGCGAAGA  | 22878 TGG | 3   | 1  |
| GGTATCTTATATTGGTATAC  | 30626 AGG | 56  | 5  |
| AATAGTACGAGGCGGTAAAA  | 22271 CGG | 2   | 1  |
| GGTATTGATAAAATTATTGA  | 6774 AGG  | 9   | 4  |
| TTTTCTTTTCGTCGCTGAAA  | 8710 TGG  | 3   | 2  |
| TAGCCACTCATATTCTTCAA  | 14783 AGG | 51  | 5  |
| TAAACGCAACGATTGATATA  | 9279 AGG  | 13  | 7  |
| GATTAATATAGATAATTATC  | 34462 GGG | 10  | 1  |
| AACCTGAACGATTAAGGAGG  | 16258 GGG | 9   | 5  |
| GAAATGGAAGCTAAGAAAAT  | 19787 TGG | 1   | 1  |
| GTTTTAACTTCTTAAATTG   | 34900 CGG | 1   | 1  |
| GGCAACGGAATAGGTTCCGGA | 34655 CGG | 4   | 2  |
| CAGCTAGTGAAGTGGTGGAG  | 34416 TGG | 3   | 1  |
| TTATCCAGGTGGCGTTATTG  | 33108 AGG | 1   | 1  |
| TAGCTATAACATAAAAAAAT  | 39779 AGG | 1   | 1  |
| GAGCGCCTTTGAATCGTTTT  | 8749 AGG  | 138 | 22 |
| TATTCTATTTTGTTGGTAAG  | 33082 TGG | 44  | 5  |
| GATTTGTTACTAATTTAGC   | 25241 TGG | 39  | 18 |
| GGTAATGTGCCTGGAGATAA  | 22338 AGG | 13  | 3  |
| AGGGTACGCGAAGGGCAAAA  | 18906 AGG | 6   | 4  |
| GAGGTGATTACCATGCTTAA  | 34248 AGG | 27  | 16 |
| GGTGGCGTTATTGAGGGATT  | 33115 CGG | 9   | 1  |
| CATATGGCAAAAGTTAAGTA  | 21294 CGG | 9   | 3  |
| GTTAAAGCTAATGATAAGGA  | 27469 TGG | 8   | 3  |
| ACCCGAAAAAATCTCATACA  | 35643 TGG | 2   | 1  |
| AAAGCGTTCGGTTTATTGAC  | 25463 TGG | 66  | 1  |
| AAAGTAGGTGGCGTAATGTT  | 33931 TGG | 19  | 5  |
| AACAAAGATAAAGATGATGA  | 4319 AGG  | 18  | 3  |
| AAATGGAACAAGTGATATTT  | 24175 GGG | 4   | 1  |
| TCTCTAAACGCTTTCGGTAA  | 31039 CGG | 4   | 4  |
| CCAGAAGCTAACCCATAAAT  | 28568 AGG | 3   | 1  |
| GAATACTTAAATAAAAAAGC  | 7390 AGG  | 9   | 1  |
| AATAATGGCAGTACTTAATG  | 24355 CGG | 5   | 3  |
| GCAACGGGTTTTTCGGAAAA  | 7225 CGG  | 2   | 1  |

|                      |       |     |     |    |
|----------------------|-------|-----|-----|----|
| CCCTTTAACCGCCATTTTAG | 23981 | CGG | 23  | 7  |
| CTTTCAACATATTTTCAA   | 12695 | AGG | 13  | 3  |
| TCCAATAACCGCGTTTTG   | 31213 | CGG | 180 | 24 |
| GTTATTTTTTGCCTTTTTT  | 40223 | GGG | 135 | 8  |
| GAAGCAGTAGGGATTATGAC | 11817 | GGG | 32  | 13 |
| ATGACGTTAATCTGGAAAGA | 10685 | TGG | 10  | 3  |
| TTTATCTATAAATAATGAAT | 28837 | TGG | 9   | 4  |
| CTTACCTAAAAATAAATATC | 37539 | CGG | 7   | 3  |
| AGATGAAGGTAAGTATTTTA | 4979  | CGG | 6   | 3  |
| AAATTCGAGGGATTAGGCAA | 28130 | AGG | 4   | 1  |
| TACTTTGCCGTTATTACAAG | 23069 | GGG | 4   | 2  |
| CCCCATGTATGAGATTTTTT | 35629 | CGG | 3   | 1  |
| GATGAAGAGTTAGATCCAAA | 20060 | CGG | 2   | 1  |
| TATACCTTTATTAAAGGTTA | 28331 | TGG | 2   | 2  |



**Normalized Reads Sonication    Normalized Reads Figure 1**

|             |             |
|-------------|-------------|
| 7579.247183 | 20131.30871 |
| 12247.64208 | 19382.03766 |
| 11105.76113 | 14575.17619 |
| 9988.22839  | 14270.67436 |
| 9501.761269 | 13510.65194 |
| 6286.308013 | 13220.04828 |
| 21894.00185 | 10844.56351 |
| 5070.885564 | 9871.50066  |
| 4731.004552 | 9531.502389 |
| 4287.271009 | 9419.665021 |
| 7950.433025 | 8700.532996 |
| 17438.28104 | 8618.547412 |
| 13726.91952 | 8354.24574  |
| 7529.060075 | 8013.855138 |
| 7102.221202 | 7659.594268 |
| 7279.615239 | 7371.420885 |
| 5979.222537 | 6878.110797 |
| 19537.69226 | 6750.231578 |
| 6789.172902 | 6691.787517 |
| 6581.964741 | 6541.468551 |
| 2288.234005 | 6450.631467 |
| 7348.684626 | 6231.615296 |
| 2666.376476 | 6212.54238  |
| 1796.300962 | 6164.077342 |
| 3478.314449 | 5820.627673 |
| 5285.547256 | 5760.775979 |
| 1288.963954 | 5651.876602 |
| 577.8971005 | 5447.897494 |
| 978.4001642 | 5395.667103 |
| 3163.775442 | 5247.932166 |
| 912.3121897 | 5163.096371 |
| 1330.703728 | 5087.422853 |
| 3919.563481 | 5071.419163 |
| 1560.272481 | 4731.345425 |
| 2381.651593 | 4721.186253 |
| 541.1263478 | 4497.355243 |
| 1539.899497 | 4494.196317 |
| 3645.273542 | 4404.958634 |
| 2276.805258 | 4348.283366 |
| 2486.994831 | 4285.460041 |
| 1337.163454 | 4232.917062 |
| 145.5923048 | 4189.828735 |
| 2056.677643 | 4156.022651 |
| 5673.627768 | 4098.871534 |

|             |             |
|-------------|-------------|
| 1500.644234 | 3986.577123 |
| 1924.501694 | 3949.92968  |
| 1022.127546 | 3912.696529 |
| 1010.698798 | 3912.019662 |
| 1805.245199 | 3862.237543 |
| 732.4336425 | 3838.460157 |
| 944.6108238 | 3738.058009 |
| 4021.428405 | 3737.422062 |
| 1305.361722 | 3734.954491 |
| 1574.682641 | 3718.693773 |
| 260.8735836 | 3689.472999 |
| 5018.213945 | 3537.975476 |
| 2026.863519 | 3498.328293 |
| 4938.212713 | 3481.762832 |
| 5585.1792   | 3481.592181 |
| 639.0160544 | 3371.199045 |
| 905.8524628 | 3302.725889 |
| 1541.390203 | 3301.826334 |
| 780.6331427 | 3268.408611 |
| 1016.661623 | 3249.95836  |
| 1795.80406  | 3185.1424   |
| 980.3877724 | 3168.420918 |
| 331.4336767 | 3095.894006 |
| 1094.675247 | 3064.102429 |
| 1160.26632  | 3049.303797 |
| 1122.004861 | 2991.117118 |
| 378.6393728 | 2969.816008 |
| 567.4621572 | 2892.332621 |
| 3164.769246 | 2890.061736 |
| 1485.737172 | 2853.812205 |
| 867.0941018 | 2834.831956 |
| 1346.107692 | 2827.894662 |
| 1053.432376 | 2807.137728 |
| 1121.011057 | 2802.769325 |
| 253.4200527 | 2780.197042 |
| 656.9045287 | 2758.069079 |
| 4754.855851 | 2711.450713 |
| 2995.822544 | 2660.659128 |
| 2627.618115 | 2617.847339 |
| 587.8351418 | 2610.350178 |
| 248.9479341 | 2603.110803 |
| 720.0110909 | 2582.57711  |
| 588.3320439 | 2565.699307 |
| 547.5860746 | 2548.155754 |
| 631.0656214 | 2542.891464 |

|             |             |
|-------------|-------------|
| 1124.489371 | 2541.283517 |
| 1662.634306 | 2488.53575  |
| 2740.414883 | 2485.156095 |
| 1168.713655 | 2483.980154 |
| 909.3307773 | 2467.427916 |
| 3707.883202 | 2440.102083 |
| 2584.884537 | 2395.926608 |
| 1400.270017 | 2392.944668 |
| 171.9281142 | 2389.140051 |
| 418.391538  | 2370.79408  |
| 428.3295792 | 2342.481914 |
| 3044.022045 | 2328.609029 |
| 853.180844  | 2327.264398 |
| 5175.234997 | 2315.054516 |
| 699.6381062 | 2309.937598 |
| 378.6393728 | 2301.762868 |
| 3589.620511 | 2285.16442  |
| 5676.60918  | 2284.934189 |
| 399.5092595 | 2275.221099 |
| 3584.154588 | 2271.192134 |
| 408.4534967 | 2244.768473 |
| 3779.437099 | 2167.119765 |
| 1454.432342 | 2166.054187 |
| 258.8859754 | 2115.903671 |
| 2191.835005 | 2049.254308 |
| 1835.059323 | 2034.588664 |
| 4572.989696 | 2025.161263 |
| 707.5885393 | 2009.16024  |
| 207.2081607 | 2004.471254 |
| 268.3271146 | 2002.297307 |
| 1569.71362  | 1993.995067 |
| 326.4646561 | 1962.86497  |
| 1019.146133 | 1959.494267 |
| 453.1746824 | 1919.574822 |
| 903.3679525 | 1915.261121 |
| 775.16722   | 1878.093234 |
| 751.812823  | 1863.461881 |
| 553.0519973 | 1849.602019 |
| 883.4918699 | 1848.820674 |
| 2245.500428 | 1825.725882 |
| 769.2043952 | 1824.932669 |
| 851.6901378 | 1774.41908  |
| 950.0767465 | 1748.911064 |
| 476.5290795 | 1742.739176 |
| 502.3679868 | 1742.308378 |

|             |             |
|-------------|-------------|
| 286.2155889 | 1730.272769 |
| 640.0098585 | 1720.761803 |
| 1025.108958 | 1717.850254 |
| 6514.882962 | 1709.780155 |
| 760.7570601 | 1685.932877 |
| 2880.044363 | 1684.537363 |
| 1454.929244 | 1666.988428 |
| 819.8884057 | 1666.647834 |
| 320.0049293 | 1661.30903  |
| 1449.463321 | 1647.643351 |
| 5731.268407 | 1647.157698 |
| 301.1226508 | 1643.857285 |
| 2144.132407 | 1621.745665 |
| 543.6108581 | 1588.986857 |
| 6980.977098 | 1578.70425  |
| 826.3481326 | 1574.555267 |
| 539.1387395 | 1570.9397   |
| 2179.909355 | 1536.718457 |
| 645.9726833 | 1526.897718 |
| 181.8661555 | 1525.269006 |
| 1264.615753 | 1493.762114 |
| 594.7917707 | 1486.524848 |
| 490.4423372 | 1485.574008 |
| 850.6963337 | 1485.109776 |
| 897.9020298 | 1481.599949 |
| 161.9900729 | 1480.132584 |
| 504.8524971 | 1459.646208 |
| 461.6220175 | 1459.023644 |
| 1475.302228 | 1452.552541 |
| 313.0483004 | 1433.309177 |
| 645.9726833 | 1426.671397 |
| 497.3989661 | 1419.859399 |
| 1716.796631 | 1418.371973 |
| 734.9181528 | 1415.821583 |
| 422.8636565 | 1414.880698 |
| 612.1833429 | 1386.769348 |
| 1492.693801 | 1379.071119 |
| 700.6319104 | 1372.182039 |
| 859.1436688 | 1362.543967 |
| 1175.173382 | 1345.67416  |
| 925.7285454 | 1339.168012 |
| 387.58361   | 1332.721295 |
| 2004.999829 | 1330.989561 |
| 243.4820114 | 1313.451285 |
| 2590.35046  | 1292.516813 |

|             |             |
|-------------|-------------|
| 169.4436039 | 1279.811526 |
| 642.9912709 | 1278.724377 |
| 139.62948   | 1266.892399 |
| 66.58487659 | 1251.751712 |
| 4668.891794 | 1250.753257 |
| 1798.785472 | 1249.698891 |
| 355.7818779 | 1236.378129 |
| 770.1981993 | 1236.084446 |
| 2869.112518 | 1231.815746 |
| 601.7483996 | 1219.505306 |
| 824.8574264 | 1218.192853 |
| 849.2056275 | 1204.527626 |
| 61.11895388 | 1189.997939 |
| 938.151097  | 1182.091902 |
| 401.9937698 | 1180.47028  |
| 3802.791496 | 1176.409336 |
| 404.4782802 | 1171.88426  |
| 151.0582275 | 1159.988025 |
| 903.8648546 | 1155.159007 |
| 381.1238832 | 1154.264683 |
| 1366.977578 | 1153.724024 |
| 380.6269811 | 1151.547565 |
| 956.0395713 | 1147.201938 |
| 393.0495327 | 1141.847899 |
| 912.8090917 | 1135.220477 |
| 631.0656214 | 1135.007191 |
| 3782.915414 | 1121.37384  |
| 219.1338103 | 1119.653821 |
| 1067.345634 | 1118.805199 |
| 1203.993701 | 1113.898902 |
| 275.7806456 | 1109.254814 |
| 270.8116249 | 1107.338955 |
| 659.389039  | 1084.538201 |
| 485.4733166 | 1083.014322 |
| 1985.620648 | 1076.6205   |
| 1098.650464 | 1072.461309 |
| 1012.189505 | 1063.425137 |
| 129.1945367 | 1058.22973  |
| 1462.879677 | 1049.704953 |
| 161.9900729 | 1040.918921 |
| 340.3779139 | 1036.131585 |
| 444.2304453 | 1031.014717 |
| 444.2304453 | 1022.617598 |
| 7319.367404 | 1017.223136 |
| 549.0767808 | 1007.403956 |

|             |             |
|-------------|-------------|
| 625.1027966 | 1000.214053 |
| 1535.92428  | 996.6933156 |
| 245.4696197 | 990.6935856 |
| 402.987574  | 988.5919928 |
| 526.7161879 | 982.4593732 |
| 510.8153219 | 982.2131036 |
| 402.987574  | 981.5717349 |
| 554.5427035 | 973.319221  |
| 2062.640468 | 969.5475874 |
| 324.9739499 | 967.7450587 |
| 153.0458357 | 955.1005604 |
| 299.6319446 | 953.7254091 |
| 1770.958956 | 947.5590013 |
| 419.3853421 | 942.8701142 |
| 155.5303461 | 941.7242893 |
| 122.7348098 | 934.9166644 |
| 759.2663539 | 933.2335    |
| 307.0854756 | 931.3507245 |
| 503.3617909 | 920.7491917 |
| 1981.148529 | 920.2218079 |
| 592.3072604 | 917.0275863 |
| 108.32465   | 912.1853967 |
| 316.5266148 | 904.2964052 |
| 287.209393  | 903.1633506 |
| 514.7905384 | 899.4667343 |
| 453.6715845 | 898.4576203 |
| 1634.807791 | 897.9772982 |
| 2076.553726 | 895.0716318 |
| 2550.598295 | 891.867103  |
| 282.7372745 | 885.796177  |
| 196.7732174 | 884.5318426 |
| 3115.07904  | 881.6295959 |
| 4182.424673 | 869.915473  |
| 1117.532742 | 868.1651856 |
| 155.033444  | 857.680704  |
| 670.3208844 | 843.2209549 |
| 556.0334097 | 838.3870111 |
| 385.0990997 | 832.7931891 |
| 338.8872077 | 831.2729312 |
| 1128.464588 | 831.0759349 |
| 391.0619244 | 830.1406316 |
| 128.6976346 | 828.6381718 |
| 275.2837435 | 826.75238   |
| 713.054462  | 817.7645254 |
| 691.1907711 | 816.5610798 |

|             |             |
|-------------|-------------|
| 422.8636565 | 812.5683157 |
| 103.8525314 | 809.8655284 |
| 549.0767808 | 809.672605  |
| 1834.065519 | 801.3544762 |
| 109.3184541 | 799.943727  |
| 814.422483  | 799.1016923 |
| 1389.338171 | 795.679201  |
| 232.550166  | 790.7794906 |
| 882.4980658 | 789.7062699 |
| 498.3927703 | 784.8571409 |
| 336.4026974 | 783.1519038 |
| 270.8116249 | 777.7197818 |
| 1163.247732 | 774.9034629 |
| 960.0147878 | 773.0376823 |
| 582.3692191 | 771.1541537 |
| 315.0359086 | 768.7731564 |
| 1250.702495 | 765.7533551 |
| 636.5315441 | 764.776671  |
| 391.5588265 | 761.3885211 |
| 137.1449697 | 755.3532431 |
| 250.9355424 | 752.9924088 |
| 308.5761818 | 750.9889625 |
| 221.1214185 | 749.2567248 |
| 442.7397391 | 749.1986008 |
| 391.5588265 | 743.8555246 |
| 68.57248484 | 743.8546697 |
| 490.4423372 | 742.432155  |
| 2847.745729 | 732.6764281 |
| 149.0706192 | 731.0544541 |
| 401.9937698 | 729.8695115 |
| 151.5551295 | 727.7379517 |
| 253.4200527 | 724.4694679 |
| 1372.443501 | 724.4471935 |
| 266.3395063 | 722.3433892 |
| 691.6876732 | 721.4949685 |
| 2059.162154 | 716.5522693 |
| 398.5154554 | 714.4652583 |
| 90.43617566 | 713.2994721 |
| 305.0978673 | 707.3246812 |
| 478.0197856 | 706.6488211 |
| 5.465922705 | 703.3941623 |
| 1925.495498 | 700.4130771 |
| 633.5501317 | 697.7699719 |
| 333.421285  | 697.7116479 |
| 1108.091603 | 697.2696386 |

|             |             |
|-------------|-------------|
| 429.3233834 | 694.1694906 |
| 793.0556943 | 691.8695949 |
| 242.4882073 | 687.4551344 |
| 1448.469517 | 685.5093588 |
| 249.9417382 | 682.9776738 |
| 105.8401396 | 680.2883617 |
| 502.8648889 | 675.6334127 |
| 243.9789135 | 675.1875321 |
| 158.0148564 | 663.8188819 |
| 1640.770616 | 660.5370727 |
| 1994.564885 | 660.0903872 |
| 1495.675213 | 658.7407283 |
| 237.0222846 | 657.4457238 |
| 246.4634238 | 656.459889  |
| 1733.691302 | 656.1246737 |
| 956.0395713 | 651.4502167 |
| 252.4262486 | 644.8867499 |
| 240.003697  | 644.1240571 |
| 116.7719851 | 631.2023657 |
| 91.42997979 | 629.0342531 |
| 1400.766919 | 628.8233799 |
| 781.6269468 | 625.2340608 |
| 183.3568616 | 624.8059783 |
| 1815.680142 | 624.3015721 |
| 370.6889398 | 624.2473211 |
| 858.6467667 | 617.2048388 |
| 207.7050628 | 616.8709817 |
| 608.7050285 | 615.9314037 |
| 43.23047958 | 615.826068  |
| 364.726115  | 614.6829078 |
| 1090.700031 | 613.5608654 |
| 682.246534  | 609.4922292 |
| 897.9020298 | 606.4336119 |
| 532.1821106 | 603.1193727 |
| 112.7967685 | 599.8675304 |
| 414.4163214 | 599.3306942 |
| 626.0966007 | 597.8351738 |
| 280.7496662 | 592.8386251 |
| 1607.975079 | 592.1677927 |
| 1320.765686 | 587.1889922 |
| 1354.555027 | 584.7482128 |
| 810.4472665 | 580.4837368 |
| 137.6418718 | 579.4607458 |
| 277.2713518 | 578.9249645 |
| 387.58361   | 576.6662479 |



|             |             |
|-------------|-------------|
| 224.599733  | 576.2754233 |
| 221.6183206 | 573.6246256 |
| 348.825249  | 571.8239066 |
| 589.8227501 | 571.010934  |
| 218.6369082 | 570.7253952 |
| 149.0706192 | 569.1028178 |
| 96.39900043 | 568.2684257 |
| 202.2391401 | 566.3922879 |
| 1385.362955 | 564.2845107 |
| 65.09417039 | 563.7521491 |
| 585.8475336 | 563.5336833 |
| 384.1052955 | 562.7696323 |
| 739.8871734 | 555.5949154 |
| 842.2489986 | 554.3382735 |
| 521.2502652 | 553.2412202 |
| 383.1114914 | 551.1392758 |
| 122.7348098 | 550.6437187 |
| 1223.869784 | 549.1711758 |
| 927.2192516 | 548.8200221 |
| 507.8339095 | 547.3192222 |
| 1010.698798 | 547.2636129 |
| 618.6430698 | 546.6092722 |
| 319.5080272 | 546.1939118 |
| 457.149899  | 544.4390482 |
| 2936.194297 | 542.8947561 |
| 1250.205593 | 541.956838  |
| 370.1920377 | 541.8636193 |
| 4868.646424 | 541.4403647 |
| 606.7174202 | 538.2323162 |
| 108.821552  | 536.5590575 |
| 317.5204189 | 531.4343953 |
| 451.1870742 | 527.9807306 |
| 560.5055283 | 527.7825277 |
| 821.876014  | 527.4157373 |
| 1440.519084 | 525.644432  |
| 2470.597063 | 525.537688  |
| 1218.403861 | 524.5644736 |
| 244.9727176 | 524.2361475 |
| 222.6121247 | 520.9858134 |
| 190.8103926 | 520.6567324 |
| 354.2911717 | 520.2799863 |
| 169.9405059 | 516.7113318 |
| 1454.432342 | 516.1334165 |
| 390.5650224 | 514.9466641 |
| 651.438606  | 513.3814559 |

|             |             |
|-------------|-------------|
| 179.3816451 | 513.121811  |
| 411.9318111 | 510.8316193 |
| 3592.601923 | 509.7534208 |
| 422.3667545 | 505.1786685 |
| 360.7508985 | 503.8110598 |
| 3550.86215  | 500.9435561 |
| 547.5860746 | 500.8727118 |
| 272.7992332 | 498.6992197 |
| 794.5464005 | 498.5901127 |
| 41.73977338 | 494.8318027 |
| 416.4039297 | 493.9036886 |
| 1606.484373 | 493.2083705 |
| 165.4683873 | 491.1075825 |
| 443.7335432 | 488.1595305 |
| 297.1474343 | 487.8339692 |
| 115.7781809 | 487.716013  |
| 181.8661555 | 486.9472358 |
| 259.8797795 | 486.5105059 |
| 240.9975011 | 486.4095947 |
| 135.6542635 | 486.1587489 |
| 508.3308116 | 484.8679173 |
| 784.1114571 | 482.5912509 |
| 222.1152226 | 480.0383981 |
| 199.7546298 | 477.2394256 |
| 226.0904392 | 473.303779  |
| 444.2304453 | 471.2215442 |
| 393.0495327 | 469.9836571 |
| 211.6802793 | 469.7479965 |
| 346.3407387 | 469.4804074 |
| 48.69640228 | 469.4203736 |
| 937.6541949 | 466.2429453 |
| 1697.417451 | 464.2068674 |
| 416.4039297 | 463.4307492 |
| 2032.329442 | 462.0719896 |
| 789.0804778 | 458.0666052 |
| 966.9714167 | 457.4207619 |
| 327.9553623 | 457.3710354 |
| 650.9417039 | 456.1469752 |
| 1395.300996 | 455.1644084 |
| 1365.486872 | 453.123856  |
| 229.5687536 | 452.8703455 |
| 172.9219183 | 449.9804675 |
| 586.3444356 | 449.7158448 |
| 1526.483141 | 449.3217522 |
| 151.0582275 | 448.7010997 |

|             |             |
|-------------|-------------|
| 559.5117242 | 443.9078816 |
| 333.9181871 | 441.1436523 |
| 616.6554615 | 440.3945347 |
| 240.500599  | 439.81134   |
| 61.61585595 | 435.5570713 |
| 587.8351418 | 435.2788733 |
| 898.3989319 | 434.5095428 |
| 198.7608256 | 432.5584378 |
| 660.8797452 | 430.9235417 |
| 166.4621915 | 430.6090926 |
| 746.3469003 | 429.6818334 |
| 1692.945332 | 428.2627883 |
| 740.8809775 | 428.0789657 |
| 685.2279464 | 426.5040534 |
| 386.0929038 | 423.3003795 |
| 319.0111251 | 420.1870079 |
| 2943.647828 | 419.0502837 |
| 341.371718  | 417.8603633 |
| 205.7174545 | 416.0201751 |
| 145.5923048 | 413.5061882 |
| 1988.105158 | 412.9794077 |
| 303.6071612 | 412.2015297 |
| 71.55389723 | 411.9392201 |
| 426.838873  | 411.4324509 |
| 521.7471673 | 411.0971355 |
| 203.7298463 | 410.60193   |
| 410.4411049 | 410.1913458 |
| 149.0706192 | 409.6804536 |
| 226.0904392 | 409.5136758 |
| 173.4188204 | 408.9013691 |
| 1263.621949 | 407.9464561 |
| 809.4534624 | 406.0315023 |
| 281.7434703 | 398.7833763 |
| 217.146202  | 397.6454955 |
| 49.69020641 | 395.0341671 |
| 273.2961352 | 394.3083287 |
| 301.6195529 | 392.3960397 |
| 54.65922705 | 391.0042968 |
| 403.484476  | 390.7502331 |
| 269.3209187 | 389.6743476 |
| 500.3803785 | 389.3705573 |
| 136.6480676 | 389.2455619 |
| 142.1139903 | 389.2343997 |
| 2595.319481 | 388.3553589 |
| 1790.338137 | 388.318906  |

|             |             |
|-------------|-------------|
| 227.5811453 | 387.7074042 |
| 378.1424708 | 387.5759728 |
| 71.55389723 | 387.5394699 |
| 70.5600931  | 387.2071709 |
| 743.8623899 | 385.8860707 |
| 709.0792454 | 385.5560848 |
| 220.1276144 | 385.315798  |
| 335.4088933 | 385.1772773 |
| 1593.068017 | 384.8922917 |
| 562.9900386 | 384.6228929 |
| 34.78314449 | 383.535292  |
| 454.1684866 | 383.2412057 |
| 325.967754  | 382.9282647 |
| 662.8673535 | 377.5385283 |
| 386.0929038 | 377.1341784 |
| 150.5613254 | 376.7862427 |
| 454.6653886 | 376.738326  |
| 273.2961352 | 376.596789  |
| 282.7372745 | 375.483344  |
| 711.5637558 | 375.2051461 |
| 71.05699516 | 373.7978665 |
| 197.7670215 | 370.7609703 |
| 71.05699516 | 369.5609944 |
| 543.6108581 | 368.82867   |
| 937.1572929 | 363.5554316 |
| 153.0458357 | 363.3774917 |
| 311.0606921 | 362.8345711 |
| 105.8401396 | 360.5735414 |
| 354.2911717 | 357.7609437 |
| 745.3530961 | 356.2145902 |
| 86.95786121 | 353.4479977 |
| 1123.495567 | 352.7535845 |
| 227.5811453 | 352.6156671 |
| 687.2155546 | 352.4050955 |
| 962.4992981 | 352.1844683 |
| 559.5117242 | 351.2578124 |
| 543.6108581 | 350.7475235 |
| 81.49193851 | 347.3515294 |
| 45.7149899  | 344.5225401 |
| 264.8488002 | 343.8493446 |
| 301.6195529 | 342.8502862 |
| 114.7843768 | 340.7389394 |
| 205.7174545 | 340.1233147 |
| 168.4497997 | 338.8572205 |
| 162.486975  | 338.4863572 |

|             |             |
|-------------|-------------|
| 1390.828877 | 337.8178879 |
| 77.516722   | 336.7835331 |
| 888.9577926 | 335.7673798 |
| 159.0086605 | 335.1917776 |
| 154.5365419 | 335.1456707 |
| 273.2961352 | 334.9759766 |
| 589.8227501 | 334.3183679 |
| 1306.355526 | 333.9551471 |
| 148.5737172 | 333.9045656 |
| 409.9442029 | 333.771626  |
| 59.13134563 | 332.5872867 |
| 89.9392736  | 332.1849483 |
| 587.3382397 | 330.8476582 |
| 488.454729  | 327.8854276 |
| 109.3184541 | 327.2763389 |
| 2276.805258 | 326.2707945 |
| 333.421285  | 325.8116902 |
| 180.8723513 | 325.4311729 |
| 972.4373394 | 322.1195484 |
| 1545.862321 | 322.0747997 |
| 538.1449354 | 321.7227911 |
| 70.06319104 | 319.1255911 |
| 302.116455  | 318.4115183 |
| 275.7806456 | 315.6654404 |
| 312.0544962 | 314.3605302 |
| 273.7930373 | 313.1149506 |
| 769.2043952 | 313.1108777 |
| 631.5625234 | 312.5162191 |
| 726.9677198 | 311.4765349 |
| 406.4658884 | 311.4653727 |
| 1598.53394  | 310.1848484 |
| 49.19330434 | 308.0669656 |
| 57.14373737 | 307.2278973 |
| 1237.28614  | 305.7447456 |
| 404.4782802 | 305.6909461 |
| 1045.978845 | 304.3042311 |
| 122.2379078 | 301.83082   |
| 217.146202  | 297.5569416 |
| 76.0260158  | 297.5063602 |
| 398.0185533 | 296.782885  |
| 1814.686338 | 296.7040464 |
| 303.6071612 | 296.3122669 |
| 344.3531304 | 296.2064279 |
| 643.488173  | 295.8787551 |
| 84.47335089 | 295.808514  |

|             |             |
|-------------|-------------|
| 45.7149899  | 295.2938505 |
| 409.9442029 | 294.7832599 |
| 183.3568616 | 294.3894689 |
| 783.6145551 | 293.321276  |
| 486.4671207 | 293.0647992 |
| 531.1883065 | 291.0960959 |
| 319.0111251 | 290.4149563 |
| 495.90826   | 289.1170854 |
| 28.82031972 | 288.9114417 |
| 76.0260158  | 288.0829823 |
| 60.62205182 | 287.5144694 |
| 356.775682  | 286.1148324 |
| 352.3035634 | 285.956652  |
| 135.6542635 | 285.0220019 |
| 127.7038305 | 280.7271574 |
| 731.9367404 | 280.6025136 |
| 468.0817444 | 279.7134172 |
| 460.1313113 | 279.6610759 |
| 314.5390066 | 278.9619365 |
| 832.8078594 | 277.9749452 |
| 173.9157224 | 277.6134842 |
| 453.6715845 | 277.5417849 |
| 105.3432376 | 275.7792287 |
| 666.84257   | 274.1804339 |
| 332.9243829 | 273.8207828 |
| 547.0891726 | 273.6957874 |
| 114.7843768 | 273.4540423 |
| 681.7496319 | 273.0440614 |
| 271.8054291 | 272.6561031 |
| 1710.833807 | 269.7653702 |
| 174.4126245 | 269.2912825 |
| 87.95166534 | 266.0558818 |
| 310.5637901 | 265.6911529 |
| 521.2502652 | 265.6173422 |
| 82.48574264 | 263.2521332 |
| 713.054462  | 262.8113304 |
| 1360.020949 | 262.5148811 |
| 181.3692534 | 261.3899223 |
| 177.8909389 | 260.4390823 |
| 36.77075274 | 260.0787778 |
| 100.871119  | 259.7764457 |
| 27.32961352 | 258.8973549 |
| 1377.412522 | 258.773566  |
| 201.245336  | 258.4717872 |
| 636.034642  | 257.103072  |

|             |             |
|-------------|-------------|
| 51.1809126  | 254.802573  |
| 359.7570944 | 254.7855281 |
| 316.0297128 | 254.1623109 |
| 397.5216513 | 254.1543667 |
| 444.7273474 | 251.3757072 |
| 80.49813438 | 250.7280541 |
| 61.61585595 | 249.7201966 |
| 142.1139903 | 247.9326513 |
| 201.245336  | 247.8844329 |
| 1122.998665 | 245.9565572 |
| 16.89467018 | 244.3145718 |
| 674.296101  | 244.3122587 |
| 63.6034642  | 243.044908  |
| 150.0644234 | 241.9441334 |
| 83.47954677 | 241.4212241 |
| 22.36059288 | 240.3809866 |
| 58.63444356 | 240.2854048 |
| 484.4795125 | 238.948668  |
| 250.4386403 | 238.4689992 |
| 236.5253825 | 238.1131193 |
| 106.8339438 | 237.335493  |
| 121.2441036 | 236.4076306 |
| 271.308527  | 234.0730418 |
| 85.46715502 | 233.2048615 |
| 80.99503645 | 232.6745613 |
| 180.8723513 | 232.3925421 |
| 409.4473008 | 230.7658419 |
| 272.7992332 | 230.6338072 |
| 181.8661555 | 230.6123378 |
| 150.5613254 | 230.4926218 |
| 31.8017321  | 229.8211862 |
| 324.9739499 | 229.7556213 |
| 346.8376407 | 228.7629989 |
| 522.7409714 | 228.4244655 |
| 64.59726833 | 226.1096364 |
| 142.6108924 | 224.5682107 |
| 1086.724814 | 223.5012243 |
| 8.944237153 | 222.9509128 |
| 135.6542635 | 222.4441935 |
| 165.9652894 | 221.8727642 |
| 396.5278471 | 221.6971874 |
| 209.692671  | 221.5430799 |
| 167.4559956 | 221.5319178 |
| 999.2700509 | 220.9857292 |
| 82.48574264 | 220.4404955 |

|             |             |
|-------------|-------------|
| 94.41139218 | 219.9272403 |
| 16.39776811 | 219.4805547 |
| 136.6480676 | 218.6705485 |
| 520.2564611 | 218.194701  |
| 1914.563653 | 218.0823759 |
| 76.52291787 | 216.690683  |
| 125.2193201 | 216.0136663 |
| 93.91449011 | 214.9919319 |
| 711.0668537 | 214.9690043 |
| 139.1325779 | 214.5369506 |
| 149.5675213 | 214.3969717 |
| 795.5402046 | 214.384603  |
| 1105.110191 | 213.6825972 |
| 476.0321774 | 212.8388027 |
| 28.32341765 | 212.5894152 |
| 472.0569609 | 211.3241759 |
| 198.2639236 | 211.2427227 |
| 161.4931708 | 211.1703702 |
| 225.5935371 | 210.4671578 |
| 224.1028309 | 209.910712  |
| 323.4832437 | 209.1616444 |
| 142.6108924 | 208.8402059 |
| 282.2403724 | 208.6987189 |
| 140.6232841 | 205.5476879 |
| 277.7682538 | 204.2383531 |
| 512.8029301 | 204.078363  |
| 383.6083935 | 203.1869035 |
| 15.90086605 | 203.1825289 |
| 249.4448362 | 203.0163544 |
| 33.29243829 | 202.6519271 |
| 167.4559956 | 201.7764059 |
| 180.3754493 | 201.4352578 |
| 256.4014651 | 200.0173693 |
| 26.3358094  | 199.6953276 |
| 92.42378392 | 199.4759569 |
| 100.871119  | 199.2059548 |
| 290.1908054 | 199.0553671 |
| 210.6864752 | 198.9853776 |
| 247.95413   | 198.3506966 |
| 612.680245  | 198.0892419 |
| 312.0544962 | 197.3483701 |
| 170.437408  | 197.2354418 |
| 106.8339438 | 197.1057702 |
| 102.8587273 | 196.7681418 |
| 87.45476328 | 196.7407896 |



|             |             |
|-------------|-------------|
| 85.96405709 | 196.0746334 |
| 761.7508642 | 195.9620067 |
| 578.8909047 | 194.5835375 |
| 1302.877212 | 194.0576619 |
| 61.11895388 | 194.020354  |
| 221.1214185 | 193.9882757 |
| 430.8140896 | 193.6835805 |
| 291.1846096 | 193.2333254 |
| 606.7174202 | 193.1180339 |
| 108.821552  | 193.0612681 |
| 460.1313113 | 192.9559824 |
| 397.0247492 | 192.523627  |
| 337.8934036 | 191.0351958 |
| 755.2911374 | 189.9093822 |
| 33.78934036 | 189.4525911 |
| 1252.690104 | 188.9899672 |
| 636.5315441 | 188.7064898 |
| 350.3159552 | 187.6379952 |
| 287.209393  | 186.4033761 |
| 379.1362749 | 185.9380876 |
| 115.7781809 | 185.5166428 |
| 289.6939034 | 185.0716671 |
| 299.6319446 | 184.7754694 |
| 717.0296785 | 184.5693223 |
| 554.0458015 | 184.4058126 |
| 337.3965015 | 184.3417059 |
| 683.2403381 | 183.562923  |
| 229.5687536 | 183.114126  |
| 360.2539965 | 182.6615078 |
| 701.6257145 | 182.3503266 |
| 284.2279807 | 179.6763496 |
| 819.8884057 | 178.7075597 |
| 165.9652894 | 178.159963  |
| 126.2131243 | 178.0461297 |
| 70.06319104 | 177.7417362 |
| 103.8525314 | 177.4038061 |
| 114.7843768 | 176.2570763 |
| 234.0408722 | 175.7912344 |
| 224.599733  | 175.5253552 |
| 183.8537637 | 175.4677345 |
| 256.8983671 | 175.3324318 |
| 271.8054291 | 175.2694817 |
| 166.9590935 | 174.7610026 |
| 349.322151  | 174.7098178 |
| 97.39280456 | 174.2313056 |

|             |             |
|-------------|-------------|
| 95.90209837 | 174.0063539 |
| 87.45476328 | 173.7966372 |
| 12.4225516  | 173.5019477 |
| 135.1573614 | 173.4004831 |
| 707.5885393 | 172.0281983 |
| 7.950433025 | 171.4111654 |
| 199.2577277 | 170.9994246 |
| 572.4311778 | 170.3723861 |
| 186.8351761 | 169.1230352 |
| 313.5452024 | 166.4337731 |
| 424.3543627 | 165.9773336 |
| 71.55389723 | 165.8935172 |
| 47.20569609 | 164.9908955 |
| 198.7608256 | 164.6876585 |
| 203.2329442 | 164.6570883 |
| 342.8624242 | 162.9515996 |
| 324.4770478 | 162.947175  |
| 165.4683873 | 162.9312867 |
| 196.2763153 | 162.1728167 |
| 137.1449697 | 161.6875169 |
| 194.7856091 | 161.2375633 |
| 2054.193133 | 161.1743116 |
| 221.6183206 | 160.3775789 |
| 228.0780474 | 160.024967  |
| 14.90706192 | 158.0418336 |
| 284.2279807 | 156.9598137 |
| 77.516722   | 156.9098356 |
| 176.8971348 | 156.850405  |
| 2295.687536 | 155.5063772 |
| 693.1783794 | 155.3272808 |
| 123.728614  | 155.3243144 |
| 538.1449354 | 154.0596784 |
| 201.245336  | 154.028505  |
| 236.5253825 | 153.7811789 |
| 360.7508985 | 153.4638133 |
| 612.1833429 | 152.1894733 |
| 14.90706192 | 151.9332982 |
| 211.6802793 | 151.7389166 |
| 254.4138568 | 151.0868889 |
| 113.7905727 | 150.7080814 |
| 147.579913  | 150.102814  |
| 2738.924177 | 149.2010971 |
| 316.0297128 | 149.1958177 |
| 76.0260158  | 149.0546323 |
| 561.9962345 | 148.8728711 |

|             |             |
|-------------|-------------|
| 793.0556943 | 148.8046414 |
| 1054.42618  | 148.447605  |
| 581.872317  | 148.3281907 |
| 119.7533974 | 148.0008695 |
| 442.242837  | 147.3014784 |
| 39.25526306 | 146.9482633 |
| 112.7967685 | 146.3709513 |
| 122.7348098 | 146.3335935 |
| 894.9206174 | 145.6953927 |
| 140.6232841 | 145.3204065 |
| 55.15612911 | 144.541322  |
| 215.1585937 | 144.3969186 |
| 201.742238  | 143.9592838 |
| 876.535241  | 143.667259  |
| 292.6753157 | 142.5661328 |
| 303.1102591 | 142.2752645 |
| 130.1883408 | 142.0420169 |
| 37.26765481 | 141.3047148 |
| 68.57248484 | 141.0303381 |
| 230.5625577 | 140.7259446 |
| 252.4262486 | 140.4344731 |
| 241.9913052 | 139.7741996 |
| 272.7992332 | 139.7377467 |
| 47.70259815 | 139.735082  |
| 18.88227844 | 139.2039269 |
| 148.5737172 | 138.9260306 |
| 288.7000992 | 138.8704213 |
| 779.6393385 | 138.7504537 |
| 663.3642555 | 138.692783  |
| 340.3779139 | 138.3066346 |
| 37.26765481 | 137.8201782 |
| 108.32465   | 137.5905003 |
| 129.1945367 | 137.4987398 |
| 202.2391401 | 136.7272978 |
| 212.6740834 | 136.6923031 |
| 159.0086605 | 136.6081851 |
| 78.51052612 | 136.3934906 |
| 80.00123232 | 135.4276671 |
| 66.58487659 | 135.3570744 |
| 1241.758258 | 135.1926597 |
| 78.01362406 | 135.002401  |
| 15.90086605 | 134.489749  |
| 1.490706192 | 134.2586129 |
| 117.2688871 | 134.0488963 |
| 886.9701844 | 133.8680399 |

|             |             |
|-------------|-------------|
| 50.18710847 | 133.7365585 |
| 523.2378735 | 133.5803897 |
| 325.470852  | 132.9430938 |
| 1155.297299 | 132.7492655 |
| 403.484476  | 131.8316604 |
| 395.534043  | 131.6234519 |
| 205.2205525 | 131.3025667 |
| 15.40396399 | 131.1858171 |
| 279.25896   | 131.1387553 |
| 80.00123232 | 131.0084804 |
| 230.0656557 | 130.8464288 |
| 3.478314449 | 130.8296356 |
| 394.5402389 | 130.7346571 |
| 40.74596925 | 130.502616  |
| 145.5923048 | 129.8629571 |
| 29.31722178 | 129.1479794 |
| 122.2379078 | 129.0973979 |
| 291.6815116 | 129.0653196 |
| 104.8463355 | 128.8471054 |
| 183.8537637 | 128.8103509 |
| 38.758361   | 128.658305  |
| 94.41139218 | 128.5312481 |
| 33.78934036 | 128.4630185 |
| 133.6666552 | 128.4077109 |
| 560.0086262 | 128.3618556 |
| 300.6257488 | 127.9842046 |
| 173.9157224 | 126.2943026 |
| 174.9095266 | 125.7025604 |
| 629.0780131 | 125.186992  |
| 328.4522644 | 125.1596398 |
| 40.24906719 | 125.0878906 |
| 16.39776811 | 124.5438135 |
| 158.5117584 | 124.4508464 |
| 212.1771814 | 124.3787955 |
| 174.9095266 | 124.3143872 |
| 270.3147229 | 124.1564585 |
| 671.8115906 | 124.0155747 |
| 41.73977338 | 123.9988314 |
| 143.6046965 | 123.506794  |
| 27.82651559 | 123.2659039 |
| 197.2701194 | 123.0615166 |
| 200.2515318 | 122.2218451 |
| 33.29243829 | 122.0515477 |
| 136.6480676 | 121.5171746 |
| 54.65922705 | 120.7819339 |

|             |             |
|-------------|-------------|
| 51.67781466 | 120.5410438 |
| 55.15612911 | 119.9852012 |
| 199.7546298 | 119.5572704 |
| 772.6827096 | 119.2943576 |
| 565.971451  | 119.0831827 |
| 689.2031629 | 118.6832074 |
| 31.30483004 | 118.6634978 |
| 24.34820114 | 118.1908683 |
| 183.8537637 | 118.0311798 |
| 44.2242837  | 117.5470865 |
| 88.44856741 | 117.4206329 |
| 48.69640228 | 117.2873917 |
| 68.07558278 | 117.0429819 |
| 195.7794132 | 116.9788752 |
| 39.25526306 | 116.5536091 |
| 171.9281142 | 116.1786229 |
| 282.7372745 | 115.9092241 |
| 197.7670215 | 115.7024738 |
| 293.6691199 | 115.3271859 |
| 320.5018313 | 115.1633745 |
| 27.32961352 | 114.7757679 |
| 80.99503645 | 114.7398682 |
| 73.54150548 | 114.6816442 |
| 240.003697  | 114.2757862 |
| 386.5898059 | 113.8734478 |
| 159.5055626 | 113.6778596 |
| 120.7472016 | 113.4590423 |
| 298.6381405 | 113.025832  |
| 88.44856741 | 112.4146818 |
| 53.66542292 | 112.1538305 |
| 1.987608256 | 111.9959018 |
| 105.8401396 | 111.749129  |
| 424.8512648 | 111.4370929 |
| 374.1672543 | 111.3200416 |
| 206.7112587 | 111.1291797 |
| 94.41139218 | 110.4571408 |
| 11.42874747 | 110.4124421 |
| 123.728614  | 110.0603835 |
| 189.3196864 | 109.8030517 |
| 94.41139218 | 109.7268779 |
| 164.9714853 | 107.3628755 |
| 26.83271146 | 107.3381881 |
| 216.6492999 | 107.316417  |
| 347.8314449 | 107.1640694 |
| 91.92688186 | 107.1419967 |

|             |             |
|-------------|-------------|
| 163.4807791 | 107.0117218 |
| 138.6356759 | 106.6432216 |
| 23.85129908 | 106.3088111 |
| 155.033444  | 105.1868187 |
| 206.7112587 | 104.864777  |
| 80.49813438 | 104.6983009 |
| 24.8451032  | 104.4745057 |
| 225.096635  | 104.2106879 |
| 526.7161879 | 104.0448151 |
| 143.1077945 | 103.9786469 |
| 119.2564954 | 103.9239426 |
| 19.3791805  | 103.5992361 |
| 179.3816451 | 103.5960181 |
| 122.7348098 | 102.7587097 |
| 139.62948   | 101.9466919 |
| 76.52291787 | 101.8546297 |
| 59.62824769 | 101.7061034 |
| 87.45476328 | 101.5717056 |
| 16.39776811 | 101.4781853 |
| 38.758361   | 101.4155368 |
| 284.7248827 | 101.303765  |
| 244.4758155 | 101.2981839 |
| 161.9900729 | 101.1223054 |
| 95.90209837 | 100.8214315 |
| 110.3122582 | 100.7649673 |
| 103.3556293 | 100.2926395 |
| 325.470852  | 100.1776497 |
| 153.0458357 | 99.72327166 |
| 266.3395063 | 99.70119894 |
| 294.662924  | 99.50239282 |
| 37.76455687 | 99.42209612 |
| 94.90829424 | 99.2541618  |
| 15.40396399 | 99.22771453 |
| 139.62948   | 98.97123771 |
| 404.4782802 | 98.7644874  |
| 283.7310786 | 98.41685333 |
| 28.82031972 | 97.61338301 |
| 51.1809126  | 97.52277905 |
| 369.6951357 | 97.50573414 |
| 607.2143223 | 97.4348398  |
| 71.55389723 | 97.17780969 |
| 34.28624242 | 97.02722192 |
| 579.3878067 | 96.71694565 |
| 75.52911374 | 96.4984299  |
| 184.8475678 | 96.11992401 |

|             |             |
|-------------|-------------|
| 496.405162  | 95.75494339 |
| 56.14993324 | 95.58228291 |
| 155.5303461 | 95.39936514 |
| 173.4188204 | 95.21554247 |
| 45.7149899  | 95.04172543 |
| 119.2564954 | 94.96409345 |
| 103.8525314 | 94.86645021 |
| 33.29243829 | 94.78967315 |
| 187.8289802 | 94.72823116 |
| 35.28004655 | 94.66382281 |
| 75.52911374 | 94.1894335  |
| 157.5179543 | 94.04472845 |
| 46.70879402 | 93.84501743 |
| 87.45476328 | 93.64857439 |
| 225.5935371 | 93.51915444 |
| 99.38041282 | 93.24829742 |
| 251.4324444 | 93.10711202 |
| 520.2564611 | 93.09388838 |
| 5.465922705 | 92.81508719 |
| 169.9405059 | 92.75801975 |
| 72.05079929 | 92.73655031 |
| 61.11895388 | 92.37569259 |
| 367.7075274 | 92.19599283 |
| 138.1387738 | 92.16864066 |
| 231.0594598 | 92.13716558 |
| 61.11895388 | 91.78395041 |
| 145.0954027 | 91.61219483 |
| 51.67781466 | 91.41957306 |
| 39.75216513 | 91.33575672 |
| 36.27385068 | 90.92929539 |
| 94.90829424 | 90.7437129  |
| 123.728614  | 90.54018061 |
| 373.1734501 | 90.49020243 |
| 91.92688186 | 90.42579409 |
| 350.3159552 | 90.33579339 |
| 50.68401054 | 89.82404627 |
| 217.6431041 | 89.72494484 |
| 527.7099921 | 89.70935812 |
| 40.24906719 | 89.65229069 |
| 266.3395063 | 89.62875979 |
| 54.65922705 | 89.56671453 |
| 579.3878067 | 89.21908045 |
| 438.7645226 | 89.21083464 |
| 110.3122582 | 88.9811567  |
| 128.2007325 | 88.96526835 |

|             |             |
|-------------|-------------|
| 133.6666552 | 88.70969642 |
| 40.24906719 | 88.54940466 |
| 175.9033307 | 87.76649889 |
| 438.7645226 | 87.31594212 |
| 97.39280456 | 87.21477923 |
| 768.7074931 | 86.89625715 |
| 8.447335089 | 86.84889372 |
| 142.1139903 | 86.84361426 |
| 20.86988669 | 86.80007209 |
| 529.6976003 | 86.66185304 |
| 110.8091603 | 86.5309749  |
| 37.26765481 | 86.52891345 |
| 89.9392736  | 86.48627618 |
| 86.95786121 | 86.02159087 |
| 210.6864752 | 85.58631918 |
| 92.42378392 | 85.34633398 |
| 144.1015986 | 85.25633328 |
| 393.5464348 | 84.93635301 |
| 60.62205182 | 84.74725089 |
| 64.59726833 | 84.59078039 |
| 11.42874747 | 84.48579624 |
| 142.1139903 | 83.97435075 |
| 15.40396399 | 83.87610424 |
| 157.5179543 | 83.86081915 |
| 144.1015986 | 83.64406322 |
| 10.43494335 | 83.10114266 |
| 28.32341765 | 82.82440292 |
| 241.4944031 | 82.54087556 |
| 178.387841  | 82.37942723 |
| 155.033444  | 82.26971691 |
| 63.10656214 | 82.23090092 |
| 107.3308458 | 81.98297154 |
| 84.97025296 | 81.80975777 |
| 705.1040289 | 81.69592453 |
| 164.9714853 | 81.62387364 |
| 137.1449697 | 81.53799585 |
| 906.8462669 | 81.5165264  |
| 48.19950022 | 81.37564263 |
| 44.2242837  | 81.33858646 |
| 163.4807791 | 81.25094885 |
| 1.490706192 | 81.17919959 |
| 59.62824769 | 81.01508655 |
| 695.1659876 | 80.78862662 |
| 13.91325779 | 80.64744122 |
| 133.6666552 | 80.45451782 |



|             |             |
|-------------|-------------|
| 354.2911717 | 80.3101144  |
| 30.31102591 | 80.28482368 |
| 190.3134905 | 79.81807692 |
| 611.6864409 | 79.35545306 |
| 53.16852086 | 79.31221253 |
| 107.8277479 | 79.29898889 |
| 707.5885393 | 79.20546855 |
| 81.49193851 | 78.80664977 |
| 181.3692534 | 78.80313013 |
| 416.4039297 | 78.7972474  |
| 80.99503645 | 77.99463201 |
| 470.0693526 | 77.94198912 |
| 50.18710847 | 77.84846878 |
| 287.7062951 | 77.64584138 |
| 9.441139218 | 77.3176153  |
| 135.1573614 | 77.28820168 |
| 85.46715502 | 76.89410907 |
| 134.6604594 | 76.72441493 |
| 136.1511656 | 76.51560318 |
| 66.08797452 | 76.48206665 |
| 127.2069284 | 76.42530085 |
| 84.97025296 | 76.06620295 |
| 182.3630575 | 75.93738627 |
| 108.821552  | 75.78503868 |
| 55.65303118 | 74.58129139 |
| 202.2391401 | 74.57862668 |
| 18.88227844 | 74.43216181 |
| 151.0582275 | 74.34246275 |
| 48.19950022 | 74.28247894 |
| 112.2998665 | 73.89748706 |
| 110.8091603 | 73.83926307 |
| 155.5303461 | 73.79189964 |
| 457.149899  | 73.48016518 |
| 11.42874747 | 73.0822513  |
| 16.89467018 | 72.98842933 |
| 560.5055283 | 72.88078045 |
| 454.1684866 | 72.48020185 |
| 80.00123232 | 72.41845823 |
| 268.8240167 | 72.13317104 |
| 223.1090268 | 72.03934907 |
| 417.8946359 | 71.88906294 |
| 1.490706192 | 71.88287858 |
| 65.59107246 | 71.8620124  |
| 18.88227844 | 71.81701205 |
| 115.2812789 | 71.77583297 |

|             |             |
|-------------|-------------|
| 79.00742819 | 71.7387768  |
| 56.14993324 | 71.46907634 |
| 11.92564954 | 71.40527126 |
| 690.196967  | 71.24291804 |
| 169.9405059 | 70.66912566 |
| 41.24287132 | 70.55559407 |
| 28.32341765 | 70.43708464 |
| 44.2242837  | 69.98180169 |
| 74.53530961 | 69.50565256 |
| 130.6852429 | 69.21302447 |
| 126.7100263 | 68.62922646 |
| 84.97025296 | 68.35012363 |
| 166.9590935 | 68.17042387 |
| 81.98884057 | 67.76456581 |
| 152.0520316 | 67.69015183 |
| 155.5303461 | 67.6242853  |
| 428.3295792 | 67.38369684 |
| 37.26765481 | 67.33869649 |
| 25.34200527 | 66.87607263 |
| 11.42874747 | 66.77048521 |
| 20.37298463 | 66.69637286 |
| 58.63444356 | 66.43491821 |
| 54.65922705 | 66.13052467 |
| 60.12514975 | 65.96113217 |
| 52.17471673 | 65.48231832 |
| 31.8017321  | 65.40644616 |
| 71.05699516 | 65.35350163 |
| 122.7348098 | 65.11175661 |
| 205.2205525 | 64.89087777 |
| 14.41015986 | 64.86940832 |
| 131.1821449 | 64.61765767 |
| 104.8463355 | 64.47737716 |
| 173.9157224 | 64.34680065 |
| 41.73977338 | 64.15533544 |
| 113.2936706 | 64.12944145 |
| 205.2205525 | 63.68889031 |
| 115.2812789 | 63.53065999 |
| 317.5204189 | 62.87450946 |
| 72.05079929 | 62.86098419 |
| 25.83890733 | 62.79627422 |
| 125.2193201 | 62.62894317 |
| 239.0098928 | 62.61305481 |
| 189.3196864 | 62.35366162 |
| 104.3494335 | 62.23630875 |
| 67.57868072 | 62.07631861 |

|             |             |
|-------------|-------------|
| 176.8971348 | 62.07043589 |
| 100.3742169 | 61.51605151 |
| 53.16852086 | 61.42222954 |
| 61.61585595 | 61.03784092 |
| 115.7781809 | 61.0181313  |
| 144.5985006 | 60.9654884  |
| 286.2155889 | 60.23170589 |
| 82.48574264 | 60.14200683 |
| 53.16852086 | 59.8587811  |
| 105.3432376 | 59.73584713 |
| 62.60966007 | 59.71995878 |
| 171.4312121 | 59.48379485 |
| 57.64063943 | 59.37086652 |
| 16.39776811 | 59.36292234 |
| 312.5513983 | 58.72472162 |
| 107.8277479 | 58.64648637 |
| 322.4894396 | 58.50208296 |
| 177.8909389 | 58.42384771 |
| 215.6554958 | 58.0491631  |
| 49.69020641 | 57.78388717 |
| 87.45476328 | 57.75829482 |
| 89.44237153 | 57.74652937 |
| 325.967754  | 57.55742724 |
| 551.0643891 | 57.33478858 |
| 2.981412384 | 57.09686483 |
| 58.63444356 | 57.03803758 |
| 310.066888  | 57.00716577 |
| 162.486975  | 56.96980797 |
| 60.62205182 | 56.87804745 |
| 47.20569609 | 56.81570056 |
| 57.14373737 | 56.5930619  |
| 94.90829424 | 56.19102511 |
| 59.13134563 | 55.90573792 |
| 228.0780474 | 55.81810031 |
| 128.6976346 | 55.73634542 |
| 94.41139218 | 55.57987493 |
| 258.8859754 | 55.49223732 |
| 353.7942696 | 55.47665059 |
| 42.23667545 | 55.16255305 |
| 16.39776811 | 55.02725037 |
| 23.35439701 | 54.68962193 |
| 13.41635573 | 54.42816728 |
| 231.5563619 | 54.41640183 |
| 335.4088933 | 54.36375893 |
| 25.83890733 | 54.31906022 |

|             |             |
|-------------|-------------|
| 247.95413   | 54.27230005 |
| 174.9095266 | 53.92260452 |
| 115.2812789 | 53.41528194 |
| 76.0260158  | 53.2941078  |
| 57.64063943 | 53.29204634 |
| 47.20569609 | 53.16705093 |
| 141.1201862 | 53.07559204 |
| 34.78314449 | 52.98971425 |
| 18.88227844 | 52.97000462 |
| 25.34200527 | 52.96060226 |
| 49.69020641 | 52.64208018 |
| 61.61585595 | 52.32798263 |
| 92.92068598 | 51.99417546 |
| 100.3742169 | 51.97064456 |
| 113.2936706 | 51.87093986 |
| 173.4188204 | 51.69154173 |
| 52.17471673 | 51.66594938 |
| 79.00742819 | 51.5177247  |
| 92.42378392 | 51.06304501 |
| 73.54150548 | 50.71158966 |
| 313.5452024 | 50.5318899  |
| 76.0260158  | 50.50071646 |
| 137.1449697 | 50.498655   |
| 14.41015986 | 50.38336358 |
| 55.65303118 | 50.30542997 |
| 43.72738164 | 50.28778179 |
| 197.2701194 | 50.18279764 |
| 154.0396399 | 50.13161293 |
| 41.73977338 | 49.94839353 |
| 0.496902064 | 49.76457086 |
| 65.59107246 | 49.71605087 |
| 37.76455687 | 49.60488236 |
| 146.0892068 | 49.52076439 |
| 19.87608256 | 49.26695228 |
| 129.1945367 | 49.21813066 |
| 5.465922705 | 49.0716658  |
| 41.73977338 | 49.01932454 |
| 3.478314449 | 48.90403312 |
| 37.26765481 | 48.7887417  |
| 159.5055626 | 48.77315498 |
| 1.490706192 | 48.68169609 |
| 113.7905727 | 48.28524039 |
| 60.12514975 | 48.15260243 |
| 39.75216513 | 48.13671408 |
| 148.0768151 | 48.09965791 |

|             |             |
|-------------|-------------|
| 663.8611576 | 47.95701431 |
| 24.34820114 | 47.8693767  |
| 58.63444356 | 47.60410078 |
| 194.7856091 | 47.53763098 |
| 191.8041967 | 47.51410008 |
| 33.29243829 | 46.97148115 |
| 83.97644883 | 46.69061851 |
| 39.25526306 | 46.51091874 |
| 57.14373737 | 46.39768878 |
| 96.39900043 | 46.37415788 |
| 230.0656557 | 46.35062698 |
| 25.83890733 | 46.18857539 |
| 32.29863417 | 46.17680994 |
| 142.1139903 | 46.14181522 |
| 40.24906719 | 46.12828995 |
| 20.86988669 | 45.5465534  |
| 217.146202  | 45.52508395 |
| 125.7162222 | 45.49979323 |
| 24.8451032  | 45.27891439 |
| 79.50433025 | 45.27127185 |
| 101.8649231 | 45.14245516 |
| 263.358094  | 45.08010827 |
| 114.7843768 | 45.02540392 |
| 122.7348098 | 45.01363847 |
| 84.97025296 | 44.98040357 |
| 92.92068598 | 44.89276596 |
| 99.38041282 | 44.28955996 |
| 0.496902064 | 44.25632506 |
| 24.8451032  | 44.12720674 |
| 444.7273474 | 43.95957406 |
| 0.496902064 | 43.74694103 |
| 52.67161879 | 43.64723633 |
| 581.375415  | 43.52430237 |
| 38.758361   | 43.44606712 |
| 28.82031972 | 43.31931189 |
| 127.7038305 | 43.14167358 |
| 135.6542635 | 43.05197451 |
| 56.14993324 | 42.96991799 |
| 191.3072947 | 42.94432564 |
| 92.42378392 | 42.9172751  |
| 341.371718  | 42.78227405 |
| 24.34820114 | 42.60287592 |
| 12.91945367 | 42.37817581 |
| 82.48574264 | 42.37641599 |
| 293.6691199 | 42.24966075 |

|             |             |
|-------------|-------------|
| 227.0842433 | 42.23583385 |
| 52.17471673 | 42.19289495 |
| 197.2701194 | 42.18495078 |
| 124.225516  | 42.17730823 |
| 58.63444356 | 42.07202244 |
| 15.90086605 | 41.9743792  |
| 253.9169547 | 41.89232268 |
| 291.1846096 | 41.81614889 |
| 129.6914387 | 41.54086733 |
| 17.88847431 | 41.48028026 |
| 81.49193851 | 41.427939   |
| 40.24906719 | 41.37529611 |
| 66.08797452 | 41.34588248 |
| 92.42378392 | 40.97089623 |
| 34.28624242 | 40.92001316 |
| 25.83890733 | 40.6779665  |
| 89.9392736  | 40.60003289 |
| 96.8959025  | 40.52209927 |
| 41.73977338 | 40.28181244 |
| 33.78934036 | 40.27623135 |
| 52.67161879 | 40.16269975 |
| 376.1548625 | 39.95182654 |
| 46.21189196 | 39.91301055 |
| 96.8959025  | 39.88565837 |
| 157.0210522 | 39.6418519  |
| 36.77075274 | 39.57714192 |
| 31.30483004 | 39.56949938 |
| 825.3543284 | 39.48362158 |
| 7.453530961 | 39.44626378 |
| 72.05079929 | 39.44244251 |
| 53.16852086 | 39.28627365 |
| 50.68401054 | 39.21422276 |
| 27.82651559 | 39.02275754 |
| 31.8017321  | 39.00158973 |
| 73.04460342 | 38.95452793 |
| 241.4944031 | 38.88805813 |
| 45.7149899  | 38.78865507 |
| 10.43494335 | 38.73571054 |
| 7.950433025 | 38.61483803 |
| 21.36678876 | 38.60513403 |
| 69.56628897 | 38.55042968 |
| 20.86988669 | 38.48395989 |
| 33.29243829 | 38.47249607 |
| 79.50433025 | 38.23809196 |
| 84.97025296 | 38.22662814 |

|             |             |
|-------------|-------------|
| 17.88847431 | 38.09575    |
| 129.1945367 | 37.84399935 |
| 115.7781809 | 37.82428972 |
| 55.65303118 | 37.82222827 |
| 227.0842433 | 37.67400358 |
| 152.5489337 | 37.48872273 |
| 12.91945367 | 37.48284    |
| 245.4696197 | 37.27402825 |
| 14.41015986 | 37.21902227 |
| 50.68401054 | 37.18402755 |
| 228.0780474 | 37.10197103 |
| 65.09417039 | 37.05903213 |
| 11.92564954 | 37.00080815 |
| 241.9913052 | 36.899042   |
| 22.36059288 | 36.88139382 |
| 47.70259815 | 36.81698548 |
| 51.67781466 | 36.81140439 |
| 9.441139218 | 36.77198513 |
| 35.28004655 | 36.49494376 |
| 41.73977338 | 36.47729558 |
| 43.23047958 | 36.46170886 |
| 20.37298463 | 36.45818922 |
| 141.1201862 | 36.43847959 |
| 617.1523636 | 36.42847396 |
| 22.85749495 | 36.39730051 |
| 62.11275801 | 36.3290709  |
| 41.24287132 | 36.295836   |
| 9.938041282 | 36.2528971  |
| 212.1771814 | 36.09290697 |
| 176.8971348 | 35.702334   |
| 18.38537637 | 35.69851272 |
| 0.993804128 | 35.60705384 |
| 53.66542292 | 35.55999204 |
| 4.472118577 | 35.5094106  |
| 33.78934036 | 35.42735408 |
| 176.4002327 | 35.39794045 |
| 70.5600931  | 35.30235866 |
| 43.72738164 | 34.99972493 |
| 63.10656214 | 34.88061224 |
| 61.11895388 | 34.85532152 |
| 80.00123232 | 34.80856135 |
| 86.95786121 | 34.80443845 |
| 36.27385068 | 34.72062211 |
| 69.56628897 | 34.71680084 |
| 25.34200527 | 34.70091248 |

|             |             |
|-------------|-------------|
| 87.95166534 | 34.64650977 |
| 25.34200527 | 34.52945853 |
| 308.5761818 | 34.49416218 |
| 93.91449011 | 34.16447791 |
| 22.85749495 | 34.07447721 |
| 99.87731488 | 34.06301339 |
| 380.130079  | 33.82860928 |
| 8.944237153 | 33.68390424 |
| 69.56628897 | 33.64096534 |
| 150.0644234 | 33.27216345 |
| 49.19330434 | 33.17452021 |
| 32.29863417 | 33.05953042 |
| 72.54770136 | 32.9871779  |
| 36.27385068 | 32.98511645 |
| 124.225516  | 32.96394863 |
| 1.490706192 | 32.86042267 |
| 44.2242837  | 32.79395287 |
| 6.459726833 | 32.66925909 |
| 61.61585595 | 32.60867201 |
| 47.70259815 | 32.54014076 |
| 46.70879402 | 32.52249259 |
| 20.37298463 | 32.47985533 |
| 17.88847431 | 32.47779387 |
| 6.459726833 | 32.47191115 |
| 3058.929106 | 32.36250245 |
| 52.17471673 | 32.21603759 |
| 128.6976346 | 32.19486977 |
| 105.3432376 | 32.18104287 |
| 80.99503645 | 32.01899128 |
| 0.993804128 | 31.87634769 |
| 34.28624242 | 31.8610626  |
| 29.81412384 | 31.81782207 |
| 7.453530961 | 31.70489374 |
| 206.7112587 | 31.65989339 |
| 51.1809126  | 31.65607212 |
| 212.1771814 | 31.65018939 |
| 45.7149899  | 31.63254122 |
| 222.6121247 | 31.38285202 |
| 106.3370417 | 30.98433487 |
| 47.20569609 | 30.9805136  |
| 20.86988669 | 30.89875871 |
| 154.5365419 | 30.82640619 |
| 70.5600931  | 30.67612005 |
| 222.6121247 | 30.58435953 |
| 131.1821449 | 30.55112463 |



|             |             |
|-------------|-------------|
| 37.26765481 | 30.51788974 |
| 25.34200527 | 30.45172157 |
| 11.42874747 | 30.29937398 |
| 20.37298463 | 30.2678989  |
| 25.83890733 | 30.11761277 |
| 309.5699859 | 29.83850994 |
| 32.29863417 | 29.75851487 |
| 13.41635573 | 29.68440253 |
| 87.95166534 | 29.67263708 |
| 170.93431   | 29.63351946 |
| 23.85129908 | 29.58675929 |
| 75.03221168 | 29.38383026 |
| 67.57868072 | 29.21971722 |
| 9.938041282 | 29.0947218  |
| 119.7533974 | 28.84885387 |
| 20.86988669 | 28.76885881 |
| 36.77075274 | 28.69474646 |
| 12.4225516  | 28.65180757 |
| 13.91325779 | 28.62239394 |
| 19.87608256 | 28.47034799 |
| 12.4225516  | 28.19506643 |
| 61.61585595 | 28.12271391 |
| 85.46715502 | 27.93919288 |
| 222.6121247 | 27.66597277 |
| 22.85749495 | 27.56244681 |
| 64.10036627 | 27.54097736 |
| 71.55389723 | 27.53333481 |
| 17.88847431 | 27.34775233 |
| 57.64063943 | 27.31657888 |
| 16.89467018 | 27.29304798 |
| 31.8017321  | 27.27952271 |
| 107.8277479 | 27.25217054 |
| 28.32341765 | 26.96718498 |
| 130.6852429 | 26.74072505 |
| 951.5674527 | 26.73102106 |
| 66.08797452 | 26.71337288 |
| 146.5861089 | 26.67043398 |
| 196.7732174 | 26.4986784  |
| 42.73357751 | 26.47132622 |
| 25.83890733 | 26.39721388 |
| 6.956628897 | 26.34044808 |
| 24.8451032  | 26.33868826 |
| 93.41758805 | 26.27221847 |
| 69.56628897 | 26.20398885 |
| 16.89467018 | 26.18840213 |

|             |             |
|-------------|-------------|
| 58.63444356 | 26.18634067 |
| 0.993804128 | 26.14752468 |
| 97.88970662 | 26.14722305 |
| 39.25526306 | 26.07311071 |
| 42.23667545 | 25.95988074 |
| 115.7781809 | 25.84076805 |
| 548.0829767 | 25.71783409 |
| 43.23047958 | 25.61636957 |
| 15.90086605 | 25.34697074 |
| 26.83271146 | 25.16344971 |
| 11.92564954 | 25.11875099 |
| 154.0396399 | 25.08139319 |
| 41.24287132 | 24.97404595 |
| 0.993804128 | 24.95669941 |
| 35.28004655 | 24.94493396 |
| 31.8017321  | 24.92140305 |
| 161.9900729 | 24.85111198 |
| 63.6034642  | 24.76523419 |
| 19.3791805  | 24.75346874 |
| 88.44856741 | 24.68730058 |
| 8.447335089 | 24.66376968 |
| 1.490706192 | 24.65612713 |
| 34.78314449 | 24.34554923 |
| 195.2825112 | 24.33584523 |
| 240.500599  | 24.3299625  |
| 23.85129908 | 24.27143689 |
| 71.55389723 | 24.24996744 |
| 303.1102591 | 24.22261526 |
| 43.72738164 | 24.21673254 |
| 6.956628897 | 24.11320657 |
| 19.87608256 | 24.09761985 |
| 215.6554958 | 24.09379858 |
| 26.3358094  | 24.07232913 |
| 42.73357751 | 24.06262513 |
| 38.758361   | 24.06056368 |
| 6.956628897 | 24.04879823 |
| 484.9764145 | 23.96880316 |
| 34.78314449 | 23.94733371 |
| 70.5600931  | 23.77557813 |
| 6.459726833 | 23.76381268 |
| 20.37298463 | 23.75617013 |
| 37.76455687 | 23.70528706 |
| 72.05079929 | 23.60382254 |
| 28.82031972 | 23.5394142  |
| 23.35439701 | 23.49059258 |

|             |             |
|-------------|-------------|
| 41.24287132 | 23.42030151 |
| 22.36059288 | 23.27383664 |
| 31.30483004 | 23.15884686 |
| 23.85129908 | 23.08649433 |
| 8.944237153 | 23.03003017 |
| 79.00742819 | 22.9362082  |
| 151.5551295 | 22.79768751 |
| 84.97025296 | 22.79768751 |
| 25.83890733 | 22.79768751 |
| 120.7472016 | 22.77033534 |
| 16.39776811 | 22.64740137 |
| 22.36059288 | 22.64533992 |
| 53.16852086 | 22.62387047 |
| 42.73357751 | 22.52240596 |
| 31.8017321  | 22.46976306 |
| 85.96405709 | 22.45799761 |
| 11.42874747 | 22.44829362 |
| 27.82651559 | 22.34094637 |
| 17.88847431 | 22.26683403 |
| 2.48451032  | 22.2568284  |
| 61.11895388 | 22.08125154 |
| 9.441139218 | 21.98184848 |
| 13.91325779 | 21.78450054 |
| 19.87608256 | 21.76509255 |
| 107.3308458 | 21.74744437 |
| 37.26765481 | 21.72215365 |
| 9.441139218 | 21.66156658 |
| 80.00123232 | 21.40775447 |
| 100.871119  | 21.34334613 |
| 14.90706192 | 21.26717234 |
| 24.34820114 | 21.24188161 |
| 37.26765481 | 21.05836058 |
| 64.59726833 | 20.93542662 |
| 70.06319104 | 20.90219172 |
| 17.88847431 | 20.74220158 |
| 23.35439701 | 20.74014013 |
| 49.19330434 | 20.59779817 |
| 25.34200527 | 20.52544565 |
| 26.83271146 | 20.46692003 |
| 7.453530961 | 20.43780804 |
| 45.21808783 | 20.35369006 |
| 256.4014651 | 20.31281262 |
| 18.38537637 | 20.28546045 |
| 3.478314449 | 20.28163917 |
| 126.2131243 | 20.2307561  |

|             |             |
|-------------|-------------|
| 1.490706192 | 20.22869465 |
| 27.32961352 | 20.12929158 |
| 43.23047958 | 20.08046996 |
| 27.32961352 | 20.01988289 |
| 12.4225516  | 20.01400017 |
| 15.90086605 | 20.01017889 |
| 53.16852086 | 19.96517854 |
| 10.93184541 | 19.92636255 |
| 5.465922705 | 19.88342366 |
| 66.08797452 | 19.86371403 |
| 3.975216513 | 19.76607079 |
| 58.63444356 | 19.74666279 |
| 34.28624242 | 19.54167231 |
| 67.08177865 | 19.51432013 |
| 22.85749495 | 19.50079486 |
| 15.90086605 | 19.48902941 |
| 80.99503645 | 19.45961579 |
| 10.43494335 | 19.30550838 |
| 26.83271146 | 19.21374786 |
| 33.29243829 | 19.20404386 |
| 29.81412384 | 19.10640062 |
| 73.04460342 | 18.88582341 |
| 1.490706192 | 18.85464997 |
| 4.472118577 | 18.79024162 |
| 51.1809126  | 18.6846542  |
| 27.82651559 | 18.68083293 |
| 33.78934036 | 18.61642459 |
| 42.23667545 | 18.59495514 |
| 28.32341765 | 18.58318969 |
| 1421.636805 | 18.56760296 |
| 104.3494335 | 18.56760296 |
| 3.975216513 | 18.42526101 |
| 191.8041967 | 18.42319955 |
| 44.2242837  | 18.40555138 |
| 56.64683531 | 18.23585724 |
| 87.95166534 | 18.15380072 |
| 24.8451032  | 18.08939238 |
| 48.19950022 | 17.98204514 |
| 56.64683531 | 17.89410589 |
| 72.54770136 | 17.70088086 |
| 12.4225516  | 17.70088086 |
| 42.23667545 | 17.66382469 |
| 10.43494335 | 17.66382469 |
| 305.5947694 | 17.52912528 |
| 35.77694861 | 17.51353855 |

|             |             |
|-------------|-------------|
| 8.447335089 | 17.40030859 |
| 88.94546947 | 17.39442586 |
| 26.83271146 | 17.37295641 |
| 0.496902064 | 17.34560424 |
| 29.31722178 | 17.33001752 |
| 12.4225516  | 17.3144308  |
| 41.24287132 | 17.14649648 |
| 122.2379078 | 17.13090976 |
| 13.41635573 | 17.00209307 |
| 127.7038305 | 16.97091963 |
| 11.92564954 | 16.91621528 |
| 94.90829424 | 16.72299025 |
| 17.39157224 | 16.7112248  |
| 29.81412384 | 16.67623008 |
| 72.54770136 | 16.60387755 |
| 99.87731488 | 16.53358648 |
| 3.975216513 | 16.49859177 |
| 8.447335089 | 16.49064759 |
| 32.29863417 | 16.29153983 |
| 41.24287132 | 16.27007038 |
| 435.7831102 | 16.26624911 |
| 16.39776811 | 16.25830493 |
| 4.472118577 | 16.19389659 |
| 34.28624242 | 16.18419259 |
| 12.91945367 | 16.17242714 |
| 41.73977338 | 16.07684535 |
| 11.42874747 | 16.07684535 |
| 83.47954677 | 15.99096756 |
| 44.2242837  | 15.96361538 |
| 75.03221168 | 15.80744652 |
| 2.48451032  | 15.77421162 |
| 76.52291787 | 15.75480363 |
| 13.41635573 | 15.72156873 |
| 46.21189196 | 15.62392549 |
| 59.13134563 | 15.62010421 |
| 34.28624242 | 15.62010421 |
| 6.459726833 | 15.59275204 |
| 11.42874747 | 15.53216497 |
| 11.92564954 | 15.42481773 |
| 30.80792797 | 15.41511373 |
| 44.2242837  | 15.38187883 |
| 56.64683531 | 15.33511866 |
| 204.7236504 | 15.30776649 |
| 9.938041282 | 15.29011831 |
| 130.1883408 | 15.21600597 |

|             |             |
|-------------|-------------|
| 5.962824769 | 14.98954604 |
| 18.38537637 | 14.93690315 |
| 46.21189196 | 14.88808152 |
| 35.28004655 | 14.87631607 |
| 43.72738164 | 14.76514756 |
| 8.447335089 | 14.76308611 |
| 23.35439701 | 14.64985614 |
| 43.72738164 | 14.58162653 |
| 54.65922705 | 14.48016201 |
| 37.76455687 | 14.43134039 |
| 35.28004655 | 14.32399315 |
| 174.9095266 | 14.28487552 |
| 14.90706192 | 14.2360539  |
| 39.75216513 | 14.15017611 |
| 7.950433025 | 14.14429339 |
| 123.2317119 | 14.08576777 |
| 32.29863417 | 14.03694614 |
| 10.43494335 | 14.03106342 |
| 12.91945367 | 14.02724215 |
| 11.92564954 | 13.78901676 |
| 31.30483004 | 13.6660828  |
| 17.88847431 | 13.61726118 |
| 51.1809126  | 13.55873556 |
| 13.91325779 | 13.55873556 |
| 9.938041282 | 13.55873556 |
| 123.728614  | 13.49432722 |
| 61.61585595 | 13.48844449 |
| 0.496902064 | 13.39080125 |
| 100.3742169 | 13.36551053 |
| 27.32961352 | 13.35374508 |
| 59.62824769 | 13.33433708 |
| 11.92564954 | 13.30492346 |
| 20.37298463 | 13.24051511 |
| 56.14993324 | 13.17610677 |
| 0.993804128 | 13.15669877 |
| 107.3308458 | 13.15463732 |
| 24.8451032  | 13.11758115 |
| 21.86369082 | 13.0531728  |
| 27.32961352 | 13.00435118 |
| 10.93184541 | 12.99846846 |
| 66.58487659 | 12.94582556 |
| 16.39776811 | 12.89112122 |
| 5.465922705 | 12.87171322 |
| 47.70259815 | 12.82083015 |
| 141.6170883 | 12.7799527  |

|             |             |
|-------------|-------------|
| 19.3791805  | 12.77789125 |
| 6.459726833 | 12.62966657 |
| 9.938041282 | 12.60613567 |
| 6.459726833 | 12.54172732 |
| 23.35439701 | 12.5164366  |
| 0.496902064 | 12.50849242 |
| 34.28624242 | 12.49878842 |
| 1.490706192 | 12.47143625 |
| 31.8017321  | 12.4499668  |
| 16.89467018 | 12.41291063 |
| 86.95786121 | 12.40702791 |
| 42.23667545 | 12.38555846 |
| 44.72118577 | 12.37967573 |
| 44.2242837  | 12.29968067 |
| 202.2391401 | 12.19821615 |
| 32.79553623 | 12.12792508 |
| 0.496902064 | 12.11027691 |
| 6.956628897 | 12.10645563 |
| 4.969020641 | 12.06733801 |
| 19.87608256 | 12.05763401 |
| 128.6976346 | 11.75117901 |
| 8.944237153 | 11.72000557 |
| 51.1809126  | 11.65353577 |
| 9.938041282 | 11.63206632 |
| 14.41015986 | 11.62236232 |
| 30.80792797 | 11.46031074 |
| 29.81412384 | 11.46031074 |
| 13.41635573 | 11.43884129 |
| 67.08177865 | 11.41148912 |
| 101.8649231 | 11.40560639 |
| 9.441139218 | 11.36855022 |
| 38.26145893 | 11.35884622 |
| 4.969020641 | 11.25532025 |
| 21.36678876 | 11.12650356 |
| 36.27385068 | 11.12062084 |
| 11.92564954 | 11.06209522 |
| 0.496902064 | 11.01533505 |
| 156.0272481 | 10.99768688 |
| 4.969020641 | 10.89622236 |
| 181.3692534 | 10.87475291 |
| 20.37298463 | 10.82004857 |
| 4.472118577 | 10.76152295 |
| 2.981412384 | 10.76152295 |
| 22.85749495 | 10.7497575  |
| 132.175949  | 10.7068186  |

|             |             |
|-------------|-------------|
| 76.0260158  | 10.68534915 |
| 17.39157224 | 10.62682353 |
| 8.944237153 | 10.61505808 |
| 28.32341765 | 10.55064974 |
| 46.70879402 | 10.44918522 |
| 13.91325779 | 10.41595032 |
| 92.92068598 | 10.37889415 |
| 69.56628897 | 10.3574247  |
| 164.9714853 | 10.32036853 |
| 5.465922705 | 10.25978146 |
| 9.938041282 | 10.23449074 |
| 6.459726833 | 10.23449074 |
| 212.6740834 | 10.17978639 |
| 11.92564954 | 10.14861295 |
| 53.66542292 | 10.0606737  |
| 63.6034642  | 10.04508698 |
| 11.42874747 | 9.861565945 |
| 16.89467018 | 9.824509774 |
| 30.80792797 | 9.781570878 |
| 65.09417039 | 9.76010143  |
| 45.21808783 | 9.732749256 |
| 60.62205182 | 9.566876397 |
| 37.26765481 | 9.5239375   |
| 8.447335089 | 9.459529156 |
| 17.39157224 | 9.34629919  |
| 7.453530961 | 9.291594844 |
| 11.42874747 | 9.233069224 |
| 34.78314449 | 9.227186499 |
| 7.950433025 | 9.227186499 |
| 156.5241502 | 9.184247603 |
| 24.8451032  | 9.141308707 |
| 120.7472016 | 9.119839259 |
| 15.40396399 | 9.045726917 |
| 5.962824769 | 9.033961466 |
| 5.962824769 | 8.957787671 |
| 118.2626913 | 8.9207315   |
| 107.3308458 | 8.914848775 |
| 3.975216513 | 8.914848775 |
| 49.19330434 | 8.899262052 |
| 26.83271146 | 8.807501534 |
| 4.472118577 | 8.758679913 |
| 7.950433025 | 8.733389192 |
| 14.90706192 | 8.727506467 |
| 8.447335089 | 8.678684846 |
| 147.083011  | 8.672802121 |



|             |             |
|-------------|-------------|
| 20.37298463 | 8.657215398 |
| 11.92564954 | 8.635745949 |
| 8.944237153 | 8.629863224 |
| 0.993804128 | 8.626041952 |
| 14.90706192 | 8.620159227 |
| 24.34820114 | 8.608393776 |
| 32.29863417 | 8.586924328 |
| 20.86988669 | 8.586924328 |
| 5.465922705 | 8.393699295 |
| 5.962824769 | 8.38781657  |
| 4.969020641 | 8.3175255   |
| 31.8017321  | 8.280469329 |
| 9.441139218 | 8.167239363 |
| 31.8017321  | 8.108713744 |
| 91.42997979 | 8.081361571 |
| 10.43494335 | 8.054009397 |
| 205.2205525 | 8.038422675 |
| 21.36678876 | 7.995483778 |
| 11.92564954 | 7.925192709 |
| 8.447335089 | 7.909605986 |
| 33.78934036 | 7.860784364 |
| 60.62205182 | 7.823728193 |
| 12.4225516  | 7.79637602  |
| 9.938041282 | 7.774906572 |
| 30.31102591 | 7.683146054 |
| 3.478314449 | 7.634324433 |
| 154.5365419 | 7.61873771  |
| 37.26765481 | 7.575798814 |
| 3.975216513 | 7.532859917 |
| 41.73977338 | 7.484038296 |
| 3.975216513 | 7.484038296 |
| 32.79553623 | 7.468451573 |
| 66.08797452 | 7.462568848 |
| 8.447335089 | 7.462568848 |
| 284.2279807 | 7.446982125 |
| 18.38537637 | 7.419629951 |
| 2.48451032  | 7.306399986 |
| 6.459726833 | 7.296695988 |
| 9.441139218 | 7.263461089 |
| 5.465922705 | 7.171700572 |
| 6.956628897 | 7.134644401 |
| 24.34820114 | 7.048766608 |
| 23.85129908 | 7.042883883 |
| 79.00742819 | 7.02729716  |
| 41.73977338 | 6.994062262 |

|             |             |
|-------------|-------------|
| 3.478314449 | 6.994062262 |
| 9.938041282 | 6.957006091 |
| 3.478314449 | 6.951123365 |
| 40.24906719 | 6.935536642 |
| 7.950433025 | 6.843776125 |
| 31.8017321  | 6.806719954 |
| 19.87608256 | 6.806719954 |
| 18.38537637 | 6.800837228 |
| 5.465922705 | 6.773485055 |
| 8.944237153 | 6.752015607 |
| 81.98884057 | 6.709076711 |
| 21.86369082 | 6.644668366 |
| 8.447335089 | 6.644668366 |
| 16.39776811 | 6.607612195 |
| 6.956628897 | 6.60172947  |
| 32.79553623 | 6.543203851 |
| 4.472118577 | 6.509968952 |
| 0.496902064 | 6.467030056 |
| 2.981412384 | 6.451443333 |
| 15.90086605 | 6.42409116  |
| 37.76455687 | 6.295274471 |
| 78.01362406 | 6.187927231 |
| 10.93184541 | 6.090283988 |
| 19.87608256 | 6.06881454  |
| 104.3494335 | 6.047345091 |
| 5.962824769 | 5.90294168  |
| 3.975216513 | 5.869706781 |
| 21.36678876 | 5.854120058 |
| 17.39157224 | 5.848237333 |
| 15.90086605 | 5.83265061  |
| 61.11895388 | 5.826767885 |
| 28.82031972 | 5.805298437 |
| 20.37298463 | 5.805298437 |
| 114.7843768 | 5.783828989 |
| 17.88847431 | 5.783828989 |
| 16.39776811 | 5.676481748 |
| 10.43494335 | 5.676481748 |
| 21.86369082 | 5.633542852 |
| 2.48451032  | 5.633542852 |
| 3.478314449 | 5.606190679 |
| 12.4225516  | 5.541782334 |
| 746.3469003 | 5.526195611 |
| 136.6480676 | 5.520312886 |
| 26.3358094  | 5.498843438 |
| 22.36059288 | 5.498843438 |

|             |             |
|-------------|-------------|
| 4.472118577 | 5.471491265 |
| 35.77694861 | 5.40708292  |
| 21.86369082 | 5.305618405 |
| 15.40396399 | 5.250914058 |
| 0.993804128 | 5.250914058 |
| 0.993804128 | 5.22944461  |
| 71.05699516 | 5.207975162 |
| 7.453530961 | 5.170918991 |
| 28.32341765 | 5.143566818 |
| 14.41015986 | 5.036219577 |
| 7.453530961 | 4.971811233 |
| 34.28624242 | 4.965928507 |
| 2.981412384 | 4.965928507 |
| 3.975216513 | 4.901520163 |
| 14.90706192 | 4.880050715 |
| 10.43494335 | 4.880050715 |
| 7.453530961 | 4.880050715 |
| 8.944237153 | 4.745351301 |
| 14.90706192 | 4.70829513  |
| 64.10036627 | 4.702412405 |
| 6.956628897 | 4.702412405 |
| 41.24287132 | 4.595065164 |
| 4.472118577 | 4.589182439 |
| 9.441139218 | 4.567712991 |
| 12.91945367 | 4.53065682  |
| 31.8017321  | 4.509187372 |
| 106.3370417 | 4.46036575  |
| 22.36059288 | 4.46036575  |
| 7.950433025 | 4.438896302 |
| 16.89467018 | 4.417426854 |
| 9.441139218 | 4.374487958 |
| 28.82031972 | 4.368605232 |
| 4.472118577 | 4.325666336 |
| 3.975216513 | 4.325666336 |
| 18.88227844 | 4.304196888 |
| 8.944237153 | 4.304196888 |
| 5.962824769 | 4.28272744  |
| 21.86369082 | 4.224201821 |
| 5.465922705 | 4.196849647 |
| 6.459726833 | 4.175380199 |
| 16.39776811 | 4.153910751 |
| 48.69640228 | 4.089502407 |
| 19.87608256 | 4.089502407 |
| 13.41635573 | 4.062150234 |
| 2.981412384 | 4.062150234 |

|             |             |
|-------------|-------------|
| 5.465922705 | 4.040680785 |
| 2.48451032  | 3.997741889 |
| 11.42874747 | 3.976272441 |
| 2.48451032  | 3.948920268 |
| 1.987608256 | 3.948920268 |
| 0.496902064 | 3.948920268 |
| 0.993804128 | 3.884511923 |
| 47.70259815 | 3.820103579 |
| 9.441139218 | 3.777164683 |
| 28.32341765 | 3.712756338 |
| 20.37298463 | 3.685404165 |
| 6.459726833 | 3.620995821 |
| 111.8029644 | 3.556587476 |
| 11.42874747 | 3.464826959 |
| 4.472118577 | 3.421888062 |
| 3.975216513 | 3.421888062 |
| 42.23667545 | 3.400418614 |
| 11.42874747 | 3.2657192   |
| 4.969020641 | 3.228663029 |
| 144.5985006 | 3.179841408 |
| 11.42874747 | 3.115433063 |
| 25.83890733 | 3.093963615 |
| 9.938041282 | 3.045141994 |
| 0.993804128 | 3.023672546 |
| 7.950433025 | 3.002203098 |
| 7.453530961 | 3.002203098 |
| 2.981412384 | 3.002203098 |
| 20.37298463 | 2.959264201 |
| 13.41635573 | 2.937794753 |
| 1.490706192 | 2.937794753 |
| 13.41635573 | 2.894855857 |
| 20.86988669 | 2.846034236 |
| 6.956628897 | 2.846034236 |
| 6.459726833 | 2.846034236 |
| 2.48451032  | 2.824564787 |
| 3.478314449 | 2.781625891 |
| 11.92564954 | 2.760156443 |
| 20.37298463 | 2.717217547 |
| 1.987608256 | 2.695748099 |
| 0.993804128 | 2.695748099 |
| 3.975216513 | 2.674278651 |
| 0.496902064 | 2.625457029 |
| 16.39776811 | 2.603987581 |
| 10.43494335 | 2.603987581 |
| 34.78314449 | 2.582518133 |

|             |             |
|-------------|-------------|
| 3.478314449 | 2.582518133 |
| 1.987608256 | 2.582518133 |
| 1.987608256 | 2.582518133 |
| 8.447335089 | 2.561048685 |
| 163.4807791 | 2.539579237 |
| 0.993804128 | 2.49664034  |
| 0.496902064 | 2.383410375 |
| 53.16852086 | 2.361940926 |
| 18.88227844 | 2.361940926 |
| 5.465922705 | 2.361940926 |
| 1.987608256 | 2.361940926 |
| 49.19330434 | 2.31900203  |
| 21.86369082 | 2.31900203  |
| 9.938041282 | 2.31900203  |
| 3.975216513 | 2.297532582 |
| 2.981412384 | 2.297532582 |
| 3.975216513 | 2.162833168 |
| 2.48451032  | 2.14136372  |
| 0.496902064 | 2.14136372  |
| 14.90706192 | 2.119894272 |
| 1.490706192 | 2.119894272 |
| 11.92564954 | 2.098424824 |
| 7.453530961 | 2.098424824 |
| 4.969020641 | 2.098424824 |
| 78.01362406 | 2.076955376 |
| 16.89467018 | 1.96372541  |
| 9.441139218 | 1.96372541  |
| 0.496902064 | 1.96372541  |
| 28.82031972 | 1.920786514 |
| 2.48451032  | 1.899317065 |
| 1.490706192 | 1.899317065 |
| 12.91945367 | 1.877847617 |
| 1.987608256 | 1.877847617 |
| 2.48451032  | 1.856378169 |
| 1.987608256 | 1.856378169 |
| 37.76455687 | 1.743148203 |
| 8.447335089 | 1.700209307 |
| 8.944237153 | 1.678739859 |
| 8.447335089 | 1.678739859 |
| 1.987608256 | 1.678739859 |
| 3.478314449 | 1.657270411 |
| 2413.453325 | 1.614331515 |
| 35.28004655 | 1.501101549 |
| 8.447335089 | 1.501101549 |
| 1.490706192 | 1.501101549 |

|             |             |
|-------------|-------------|
| 136.6480676 | 1.479632101 |
| 21.36678876 | 1.479632101 |
| 2.981412384 | 1.479632101 |
| 1.490706192 | 1.479632101 |
| 0.496902064 | 1.479632101 |
| 1.490706192 | 1.458162653 |
| 57.14373737 | 1.436693204 |
| 11.92564954 | 1.280524342 |
| 10.43494335 | 1.280524342 |
| 9.441139218 | 1.280524342 |
| 2.48451032  | 1.280524342 |
| 1.490706192 | 1.280524342 |
| 27.82651559 | 1.259054894 |
| 0.993804128 | 1.259054894 |
| 4.472118577 | 1.237585446 |
| 1.490706192 | 1.237585446 |
| 25.34200527 | 1.081416584 |
| 6.459726833 | 1.081416584 |
| 4.969020641 | 1.081416584 |
| 4.472118577 | 1.081416584 |
| 0.496902064 | 1.081416584 |
| 0.496902064 | 1.081416584 |
| 1.987608256 | 1.059947136 |
| 1.490706192 | 1.059947136 |
| 0.496902064 | 1.059947136 |
| 0.496902064 | 1.059947136 |
| 68.57248484 | 1.038477688 |
| 21.86369082 | 1.038477688 |
| 19.3791805  | 1.01700824  |
| 6.459726833 | 1.01700824  |
| 2.981412384 | 1.01700824  |
| 13.41635573 | 0.860839378 |
| 4.472118577 | 0.860839378 |
| 4.472118577 | 0.860839378 |
| 3.975216513 | 0.860839378 |
| 0.993804128 | 0.860839378 |
| 32.79553623 | 0.839369929 |
| 9.441139218 | 0.839369929 |
| 8.944237153 | 0.839369929 |
| 1.987608256 | 0.839369929 |
| 1.987608256 | 0.839369929 |
| 1.490706192 | 0.839369929 |
| 4.472118577 | 0.640262171 |
| 2.48451032  | 0.640262171 |
| 0.993804128 | 0.640262171 |

|             |             |
|-------------|-------------|
| 11.42874747 | 0.618792723 |
| 6.459726833 | 0.618792723 |
| 89.44237153 | 0.419684965 |
| 67.08177865 | 0.419684965 |
| 15.90086605 | 0.419684965 |
| 4.969020641 | 0.419684965 |
| 4.472118577 | 0.419684965 |
| 3.478314449 | 0.419684965 |
| 2.981412384 | 0.419684965 |
| 1.987608256 | 0.419684965 |
| 1.987608256 | 0.419684965 |
| 1.490706192 | 0.419684965 |
| 0.993804128 | 0.419684965 |
| 0.993804128 | 0.419684965 |

| Spacer Sequence        | Location | Strand | PAM | Reads | Replicate 1 |
|------------------------|----------|--------|-----|-------|-------------|
| TTTGTAACAACACTGATATTAA | 21       | -      | AGG |       | 23          |
| TTTAATATCAGTTGTTACAA   | 39       | +      | AGG |       | 5           |
| AGCGTCTTTAAAAATAAAAA   | 68       | +      | AGG |       | 1           |
| GCGTCTTTAAAAATAAAAA    | 69       | +      | GGG |       | 451         |
| AATAAAAAAGGGCAGAAAAA   | 80       | +      | GGG |       | 331         |
| AGAAAACTTGTGTAATAAA    | 93       | -      | AGG |       | 1073        |
| AGATGAAAAACGACTATAA    | 165      | -      | AGG |       | 944         |
| AAAGCAATTATGAAAAGAGT   | 194      | -      | AGG |       | 4330        |
| TACACACATAAGTTTATTGG   | 234      | -      | CGG |       | 3690        |
| GCATACACACATAAGTTTAT   | 237      | -      | TGG |       | 723         |
| AAGTTACTACTCACACTA     | 259      | -      | AGG |       | 7734        |
| ATTTAATGATTCTGCAGCTG   | 308      | +      | AGG |       | 1197        |
| GAAATCCTATGCAAGGCAGT   | 331      | -      | AGG |       | 2141        |
| TGCCAAGGAAATCCTATGCA   | 338      | -      | AGG |       | 1771        |
| TGCCTTGCATAGGATTTCTT   | 352      | +      | TGG |       | 375         |
| TTTATATTCACAACCTTGCCA  | 353      | -      | AGG |       | 1132        |
| AACCAAGCTATGTTGATAGA   | 376      | -      | GGG |       | 357         |
| GAACCAAGCTATGTTGATAG   | 377      | -      | AGG |       | 3           |
| AACCCTCTATCAACATAGCT   | 390      | +      | TGG |       | 1116        |
| AAATAAAAAGATGCAACAAT   | 399      | -      | GGG |       | 8409        |
| AAAATAAAAAGATGCAACAA   | 400      | -      | TGG |       | 184         |
| ATTTGCTATCCTTGAATTGA   | 461      | +      | TGG |       | 610         |
| GGTATGACTTTGGCCGAAC    | 479      | -      | AGG |       | 2686        |
| GGCGATTTTTCTTCCTAGTT   | 482      | +      | CGG |       | 16          |
| AGAAAAACAAGGTATGACTT   | 489      | -      | TGG |       | 785         |
| AAACAATCAAGAGAAAAACA   | 500      | -      | AGG |       | 1689        |
| TAATAGAACTATCAAGTAAA   | 556      | -      | AGG |       | 993         |
| TCTATTATAAGGAAAACTTT   | 588      | +      | CGG |       | 453         |
| TTATCATGATGTTACAAAAG   | 637      | -      | AGG |       | 1050        |
| GATTACTTACGTAATGCGAA   | 676      | +      | AGG |       | 2696        |
| TTCAAAAGTTTAGTATCTAT   | 698      | -      | AGG |       | 20913       |
| TAACTTTTGAAATCTAAAA    | 725      | +      | TGG |       | 4           |
| GACACCAATTTCTTCAGAAA   | 756      | -      | GGG |       | 508         |
| TGACACCAATTTCTTCAGAA   | 757      | -      | AGG |       | 3           |
| AAAACCCTTTCTGAAGAAAT   | 768      | +      | TGG |       | 74          |
| ACTTTATCTAACATGATACA   | 804      | +      | CGG |       | 11203       |
| CTTTATCTAACATGATACAC   | 805      | +      | GGG |       | 11745       |
| CCATTTATTACCGGGTAGGA   | 821      | -      | TGG |       | 1469        |
| AATACCATTTATTACCGGGT   | 825      | -      | AGG |       | 1055        |
| GAGAACAAAACCATCCTACC   | 827      | +      | CGG |       | 21295       |
| AAATAAATACCATTTATTAC   | 830      | -      | CGG |       | 353         |
| CCATCCTACCCGGTAATAAA   | 837      | +      | TGG |       | 7676        |



|                        |        |     |       |
|------------------------|--------|-----|-------|
| AAAATATCTCTTCCTTCTTG   | 869 -  | AGG | 648   |
| TTAGAATTGACACCTCAAGA   | 873 +  | AGG | 13956 |
| AAAAAGAAAGTTTTAACTTA   | 927 +  | AGG | 1106  |
| AAGAAAGTTTTAACTTAAGG   | 930 +  | AGG | 5450  |
| ACTTAAGGAGGAACAACAAA   | 942 +  | TGG | 16    |
| TTGATTTGCGTGCCACTGTGC  | 993 -  | GGG | 12816 |
| GTTGATTTGCGTGCCACTGTG  | 994 -  | CGG | 1927  |
| AGCAATTCACACCCGCACAG   | 998 +  | TGG | 29015 |
| GAAATCAACAGAATTATTGA   | 1024 + | CGG | 182   |
| GTCGTGCGAGTTGTAGCTCGG  | 1048 - | CGG | 23    |
| TTGGTTCGTGCGAGTTGTAGCT | 1051 - | CGG | 1285  |
| TTTTAATAACCTCAACATCT   | 1070 - | TGG | 27705 |
| ACTCGACGACCAAGATGTTG   | 1077 + | AGG | 9764  |
| AGTTATTCAAAAATCACGAA   | 1154 + | AGG | 910   |
| GTGAATTGCTAGTAGTGTGT   | 1181 - | TGG | 17596 |
| GAAACAATCTTTATAAACGC   | 1308 + | AGG | 317   |
| GAATTAGCTATCATAACTTC   | 1365 + | TGG | 6463  |
| TTATCTAATTGTTTATCGAT   | 1389 + | TGG | 5700  |
| ATTGGAGCATGCAAATAACT   | 1407 + | TGG | 6564  |
| TCTGATGAATATTCATCTCT   | 1424 - | CGG | 32678 |
| AACACCTATTAACGTAGTAT   | 1449 - | TGG | 6680  |
| GATTCCAATACTACGTTAAT   | 1461 + | AGG | 10539 |
| GTTGTAGCTTTTCTAGCTTT   | 1646 - | AGG | 71    |
| ATTTAAGGTGGTTATTCTTA   | 1698 - | TGG | 2349  |
| TTGTTATCAAATATTTAAGG   | 1710 - | TGG | 2891  |
| ATGTTGTTATCAAATATTTA   | 1713 - | AGG | 8482  |
| TTACAAACAAAATCGAACAT   | 1802 + | CGG | 1407  |
| AATATTCAAGAAAAAGAAAA   | 1835 + | TGG | 1     |
| AAGAGAGTTATATAAAGCTT   | 1876 + | TGG | 12238 |
| TTAAAAAGCGTTTTAGCGCT   | 1902 + | TGG | 4     |
| TAAAAAGCGTTTTAGCGCTT   | 1903 + | GGG | 102   |
| TGAAGCATTTCAAAGAAAAT   | 1938 + | AGG | 4     |
| GAAGCATTTCAAAGAAAATA   | 1939 + | GGG | 208   |
| TACAAGTGTA CTTACAAGTA  | 1966 + | CGG | 7212  |
| ACAAGTACGGTTGTTAATAA   | 1979 + | CGG | 1247  |
| AAACATGTTGCGATGATGTC   | 2048 + | AGG | 30908 |
| ATGATGTCAGGTACAGAAAA   | 2060 + | AGG | 295   |
| TGTTCCATGCTTTTTCAATT   | 2091 - | TGG | 2546  |
| TCATCCAAATTGAAAAAGCA   | 2103 + | TGG | 1001  |
| GCACGTTGCATAATCATTTTC  | 2116 - | TGG | 1864  |
| GCATCTGCAAATACAATTTT   | 2197 - | TGG | 73    |
| ACTAAGACATCAATTTTAGT   | 2246 + | TGG | 3190  |
| GCAAAGATCATTAACAAAA    | 2276 + | CGG | 1419  |

|                      |        |     |       |
|----------------------|--------|-----|-------|
| AAACAAAACGGTATAAACAT | 2288 + | CGG | 4     |
| AACAAAACGGTATAAACATC | 2289 + | GGG | 8147  |
| GGCAACGCAGATTGTTTGAG | 2310 + | TGG | 588   |
| TTTGAGTGGTTACGTCAAAA | 2324 + | CGG | 45    |
| CCACACCCTTGCGTTTAATA | 2334 - | AGG | 12777 |
| CGGATTCCTTATTAACGCA  | 2344 + | AGG | 5189  |
| GGATTCCTTATTAACGCAA  | 2345 + | GGG | 3125  |
| CCTTATTAACGCAAGGGTG  | 2350 + | TGG | 22    |
| CGTTCATTGAATACTGTGT  | 2368 - | AGG | 52680 |
| CATGCCTACACAGTATTCAA | 2380 + | TGG | 4122  |
| AGAAACATCAATCACACATT | 2425 + | CGG | 1469  |
| ACATCAATCACACATTCGGA | 2429 + | CGG | 96    |
| TGTCCTTTACCTGTTACTTT | 2458 - | TGG | 18648 |
| AGTAAGACGCCAAAAGTAAC | 2465 + | AGG | 14924 |
| ACGCCAAAAGTAACAGGTAA | 2471 + | AGG | 117   |
| TACTTTGTTAACAAGTTTTT | 2501 + | AGG | 23    |
| AGAAAAACAAACACTTAAT  | 2524 + | AGG | 11575 |
| AACTGCCATTGTGATGAGGA | 2564 - | GGG | 15    |
| CAACTGCCATTGTGATGAGG | 2565 - | AGG | 5     |
| TCACAACTGCCATTGTGATG | 2568 - | AGG | 107   |
| AACAACCCTCCTCATCACAA | 2575 + | TGG | 851   |
| AATGGCAGTTGTGACGTGGA | 2593 + | AGG | 9     |
| CAGTTGTGACGTGGAAGGTT | 2598 + | TGG | 348   |
| AACGCCCTGCTACTAATCAC | 2629 - | AGG | 1111  |
| GAAAACCTGTGATTAGTAGC | 2640 + | AGG | 61    |
| ATTTTCAGCATCTTTCGGTA | 2681 - | TGG | 2171  |
| GTAGAATTTTCAGCATCTTT | 2686 - | CGG | 5714  |
| TTTGTTGCGCGAACTTCAA  | 2724 - | AGG | 4642  |
| TTATTTGCTAATAGTTTGTT | 2738 - | CGG | 6259  |
| GTTGGTGGTACTATGATTTT | 2793 - | TGG | 41    |
| TATGTGTTTTCTGGTGTGG  | 2808 - | TGG | 124   |
| CTATATGTGTTTTCTGGTGT | 2811 - | TGG | 109   |
| TCGCCTCTATATGTGTTTTC | 2817 - | TGG | 29    |
| ACACCAGAAAACACATATAG | 2830 + | AGG | 5606  |
| ACACAAATCCATCAATTGTT | 2890 + | TGG | 11505 |
| GTAGAAGTACAGTATACAAC | 2918 + | TGG | 13903 |
| TATTACCGCAAAGATAATTT | 2947 + | AGG | 1855  |
| ATATTAATCAGAGTGCCTGT | 2982 - | TGG | 5350  |
| TACATTGATTATTCACCAAC | 2983 + | AGG | 6648  |
| TCTGATTAATATTTCTAAAT | 3009 + | TGG | 5853  |
| TGATCAGAAAGCATAAAAAA | 3041 + | TGG | 1     |
| AAAGCATAAAAAATGGTATT | 3048 + | AGG | 1202  |
| GCATAAAAAATGGTATTAGG | 3051 + | AGG | 1571  |

|                       |        |     |       |
|-----------------------|--------|-----|-------|
| TGAAGCATAATACTGCTACT  | 3088 - | AGG | 23825 |
| GCTGTAGTGAAGTATAGAAA  | 3134 - | CGG | 4049  |
| TTCTATACTTCACTACAGCA  | 3154 + | TGG | 4609  |
| CACTACAGCATGGTCAATTG  | 3164 + | CGG | 4     |
| ACTACAGCATGGTCAATTGC  | 3165 + | GGG | 207   |
| ATAAAAAAACTGCTACTTGT  | 3239 + | TGG | 38980 |
| GTTCAATATAAAACGAAAAA  | 3300 + | CGG | 3217  |
| CAATATAAAACGAAAAACGG  | 3303 + | AGG | 878   |
| GTCAAGATGTATTACGAAAT  | 3328 + | AGG | 6727  |
| CGCAAAAATATTCATGTTAA  | 3361 + | CGG | 1575  |
| ATTCATTTTAAAAGGTCATA  | 3399 + | TGG | 1288  |
| TTCATTTTAAAAGGTCATAT  | 3400 + | GGG | 2128  |
| ACGACATAAGCATGTTTAAT  | 3441 - | TGG | 11300 |
| AGATGAGAATGACTTAGATA  | 3480 + | TGG | 1258  |
| CAATCCATTCATCTATTGCT  | 3503 - | TGG | 34547 |
| TTAACCAAGCAATAGATGAA  | 3515 + | TGG | 451   |
| TGAAGAGAACACAGACGAAC  | 3540 + | AGG | 13776 |
| TAATTAECTTAGTCATGAAA  | 3569 + | TGG | 3635  |
| TAACTTAGTCATGAAATGGT  | 3573 + | AGG | 6055  |
| CTTAGTCATGAAATGGTAGG  | 3576 + | AGG | 6     |
| TAACTTATATCATTCGTCAT  | 3617 + | AGG | 816   |
| AACTTATATCATTCGTCATA  | 3618 + | GGG | 1147  |
| GGTTTGTTAGTTATATAAAT  | 3630 - | TGG | 1263  |
| ATATCTGAATTGTTATCAGT  | 3651 - | TGG | 12604 |
| CCTAGCTCTATTTCTATTTG  | 3682 - | TGG | 26    |
| CCACAAATAGAAATAGAGCT  | 3698 + | AGG | 908   |
| CACAAATAGAAATAGAGCTA  | 3699 + | GGG | 891   |
| AATAGAGCTAGGGAGTTTAA  | 3709 + | CGG | 11354 |
| AGCTAGGGAGTTTAAACGGTA | 3714 + | TGG | 4966  |
| GGAAGAAGCGAGTATCAATA  | 3735 + | TGG | 1148  |
| GACAGAACTATTGAGTACG   | 3786 + | AGG | 7503  |
| GAGGAGGTAGAACATGACTG  | 3805 + | AGG | 6     |
| AGTATGCTTACTTTTTCTTG  | 3823 - | TGG | 15478 |
| ATATCGCTGAGAAAAATAAA  | 3882 + | AGG | 3     |
| TTCTATAAATTTGCAGTATA  | 3908 + | CGG | 20    |
| TTTGCAGTATACGGAAAAAT  | 3917 + | TGG | 880   |
| GTATACGGAAAAATTGGCTC  | 3923 + | AGG | 13    |
| TTTATCTCTTGTAGCAAACG  | 3935 - | TGG | 4264  |
| TTCGTCATTGACATTAACGA  | 3980 + | AGG | 965   |
| GTCATTGACATTAACGAAGG  | 3983 + | TGG | 69    |
| CATTAACGAAGGTGGAACAA  | 3991 + | CGG | 7465  |
| GGAACAACGGTACTGACGA   | 4004 + | AGG | 117   |
| CTCATCTCCTGTAAATTTG   | 4066 - | AGG | 46    |

|                      |        |     |       |
|----------------------|--------|-----|-------|
| TTTTTTACCTCAAATTTTAC | 4075 + | AGG | 1869  |
| TTACAGGAGATGAGAGAAAA | 4091 + | CGG | 13    |
| TCTCCCAATCATTAACGT   | 4186 - | TGG | 2243  |
| AAAAACCAACGTTTAATGAT | 4197 + | TGG | 538   |
| AAAACCAACGTTTAATGATT | 4198 + | GGG | 41    |
| AAACCAACGTTTAATGATTG | 4199 + | GGG | 55    |
| GTCAGTATGTACAGATTAAT | 4241 + | AGG | 23623 |
| CATGACCTGTAATAACAAAG | 4272 - | TGG | 975   |
| AAATTCCACTTTGTTATTAC | 4283 + | AGG | 4506  |
| TTTGTTATTACAGGTCATGA | 4292 + | AGG | 3     |
| AACAAAGATAAAGATGATGA | 4319 + | AGG | 2     |
| GCGCTTCAATAGTGATAGTA | 4338 - | GGG | 23891 |
| TGCGCTTCAATAGTGATAGT | 4339 - | AGG | 2473  |
| CTCAAAGTGATGTGTTAGCT | 4404 + | AGG | 2916  |
| TCAAAGTGATGTGTTAGCTA | 4405 + | GGG | 12854 |
| ATTGAAGAATTTGATGATAA | 4433 + | CGG | 38    |
| TTATTGTTAATTGTTATTGA | 4510 - | AGG | 13    |
| TCTACTACGTCCGTAATGCT | 4546 - | AGG | 8857  |
| ATTTGCAAATCCTAGCATT  | 4552 + | CGG | 2703  |
| GTAGTAGAAGCAATTAGAAA | 4577 + | TGG | 5409  |
| GAAACTAAAAATTAATTA   | 4599 + | AGG | 23    |
| CTAAAAATTAATTAAGGA   | 4603 + | CGG | 353   |
| TATTTAATTATGAAAATCAC | 4626 + | AGG | 2148  |
| AATCAAGAAAAGTTTATAA  | 4674 + | CGG | 308   |
| AAGTTTTATAACGGCTCAGC | 4683 + | AGG | 34    |
| AGTTTTATAACGGCTCAGCA | 4684 + | GGG | 6572  |
| GGCTCAGCAGGGTTTCAAGC | 4695 + | TGG | 310   |
| TGGAAATCATATTTATACGG | 4814 - | CGG | 5     |
| TCTTGGAAATCATATTTATA | 4817 - | CGG | 9145  |
| ATTGAATTAGTTACTCGATT | 4866 + | AGG | 8544  |
| TTGGTATCAAATCTAAGCT  | 4889 - | AGG | 438   |
| AACTTACCAATAAGATCAT  | 4908 - | TGG | 142   |
| TTTGATACCAATGATCTTAT | 4917 + | TGG | 11700 |
| TATTGGTAAGTTTTGTCACT | 4934 + | TGG | 3218  |
| TTTGTCACTTGGTATTGAAA | 4945 + | TGG | 4     |
| TGGAAATTCAATGAAGATGA | 4965 + | AGG | 712   |
| AGATGAAGGTAAGTATTTTA | 4979 + | CGG | 1     |
| ACATCATCGCCCTTTTGT   | 5003 - | AGG | 1662  |
| ATTTATTAACCTTACAAAA  | 5009 + | AGG | 384   |
| TTTATTAACCTTACAAAA   | 5010 + | GGG | 3822  |
| TGCTTATCTGTCTTCGGAAT | 5036 - | AGG | 6362  |
| GCTTTTTGCTTATCTGTCTT | 5042 - | CGG | 157   |
| CAAAAAGCTGAAGAAAATAA | 5073 + | CGG | 476   |

|                      |        |     |       |
|----------------------|--------|-----|-------|
| AAAAAGCTGAAGAAAATAAC | 5074 + | GGG | 350   |
| AAAAGCTGAAGAAAATAACG | 5075 + | GGG | 135   |
| AATTGGCCACTGCTTTCAA  | 5117 - | TGG | 3037  |
| AGCAATCCATTTGAAAGCAG | 5127 + | TGG | 5730  |
| CTTGGTCGTCATATCCAAAT | 5134 - | TGG | 6213  |
| TTTGAAAGCAGTGGCCAATT | 5136 + | TGG | 44    |
| CACCTTAAAACGCTAAATCT | 5152 - | TGG | 14897 |
| AGATTTAGCGTTTTAAGGTG | 5171 + | TGG | 125   |
| AAGTACCGTCGTTATCTTTC | 5203 - | TGG | 211   |
| AGATACCAGAAAGATAACGA | 5214 + | CGG | 1085  |
| TTCAACACCAGTAGCAACGA | 5229 - | CGG | 708   |
| ACTTATTCCGTCGTTGCTAC | 5238 + | TGG | 7036  |
| CACATTGACTTACTAGAAAA | 5280 + | CGG | 16    |
| ACCTCTACTTCTGCTTTTAG | 5291 - | TGG | 555   |
| TCCACTAAAAGCAGAAGTAG | 5306 + | AGG | 693   |
| AAAAGCAGAAGTAGAGGTTC | 5312 + | CGG | 195   |
| ATAGATAGTTTTTTATTGTC | 5315 - | CGG | 208   |
| GTAGAGATATAGAACTTCAC | 5383 + | TGG | 6206  |
| TAGAGATATAGAACTTCACT | 5384 + | GGG | 28586 |
| AGAGATATAGAACTTCACTG | 5385 + | GGG | 381   |
| AATTTTCTAGTTGATTCTAC | 5396 - | TGG | 1663  |
| AAAATTATTACAAACAGAAT | 5429 + | TGG | 1173  |
| ACAGAAATTGAAATTATGAA | 5442 + | AGG | 3     |
| ACTGTTCTATGAAAGTTGCA | 5488 + | AGG | 46    |
| CTGTTCTATGAAAGTTGCAA | 5489 + | GGG | 1489  |
| TACTCGTTTCTACTCAT    | 5540 - | AGG | 263   |
| AAGATAAAGCGTTATTATAT | 5590 + | TGG | 2     |
| TTCCGCATATTACACAGTTG | 5608 - | CGG | 36    |
| AACCGCAACTGTGTAATATG | 5622 + | CGG | 15    |
| CGGAAAGCCTCACGCAGACC | 5642 + | TGG | 7059  |
| CGACTGCTTCATAATGTGCC | 5644 - | AGG | 66    |
| CTGGCACATTATGAAGCAGT | 5661 + | CGG | 1547  |
| CTAATACATGTTTGTATAG  | 5695 - | TGG | 5577  |
| CACAACGAGCAACATGCGAT | 5751 + | TGG | 10590 |
| TTATCCACGAGTCATGCAAG | 5782 - | TGG | 56    |
| AATACCACTTGCATGACTCG | 5794 + | TGG | 2602  |
| CGTGGATAAAAGTTGATGAG | 5812 + | AGG | 1305  |
| AGGCTCAATAAAATGTTGAA | 5832 + | AGG | 78    |
| AATGTTGAAAGGAGAGAAAA | 5843 + | AGG | 3     |
| CTTCCGCCAAGATGACGATT | 5883 - | AGG | 1231  |
| AGCACTCCTAATCGTCATCT | 5893 + | TGG | 15066 |
| ACTCCTAATCGTCATCTTGG | 5896 + | CGG | 5350  |
| TGCTATGCATGCTGTAAAAG | 5932 + | TGG | 1303  |

|                        |        |     |       |
|------------------------|--------|-----|-------|
| AAAAACCTGTATTAATACTAAA | 5956 - | CGG | 221   |
| AATCTCCGTTTAGTTAATAC   | 5967 + | AGG | 1088  |
| TTTTACAAAAGCTTTACCAT   | 5991 + | AGG | 6029  |
| TCAATTAGTTTGTCCGCCTA   | 5991 - | TGG | 476   |
| TGGGTAATAGACATCAAAAA   | 6015 - | AGG | 96    |
| TTTTTTGATGTCTATTACCC   | 6033 + | AGG | 1604  |
| TTTTTGATGTCTATTACCCA   | 6034 + | GGG | 672   |
| AAAGTTACATTACAGCCCCT   | 6034 - | GGG | 161   |
| TTTTGATGTCTATTACCCAG   | 6035 + | GGG | 870   |
| TAAAGTTACATTACAGCCCC   | 6035 - | TGG | 8     |
| GAAACAATAAGTAACTTTC    | 6075 - | TGG | 1319  |
| AAAGTTTACTTATTGTTTCT   | 6095 + | AGG | 515   |
| GTTAAAAGAATGTTAAAGTC   | 6108 - | AGG | 1405  |
| GAAAAACAAAGATTTGTTTC   | 6141 - | GGG | 11672 |
| AGAAAAACAAAGATTTGTTT   | 6142 - | CGG | 1037  |
| TTAAAGTGATTTAAAAACTG   | 6190 + | AGG | 295   |
| ATGTCTTACTTAACAAAAAA   | 6219 - | AGG | 3     |
| TAATAACCTAGTAAGGTTAG   | 6262 - | GGG | 11    |
| TTAATAACCTAGTAAGGTTA   | 6263 - | GGG | 5     |
| ATTAATAACCTAGTAAGGTT   | 6264 - | AGG | 342   |
| TTTCAATTAATAACCTAGTA   | 6269 - | AGG | 274   |
| TTAAAACCCCTAACCTTACT   | 6272 + | AGG | 10403 |
| TAGGTTATTAATTGAAATTT   | 6291 + | CGG | 1     |
| TCGGTTGATTCTATATCTAA   | 6310 + | CGG | 401   |
| GAATGACGGTATGAATATAT   | 6337 - | CGG | 1369  |
| GTTTTAAACCCAAAGAATGA   | 6351 - | CGG | 3600  |
| ATATTCATACCGTCATTCTT   | 6358 + | TGG | 12611 |
| TATTCATACCGTCATTCTTT   | 6359 + | GGG | 3306  |
| TCCTGCCGTTAAATATAGAG   | 6373 - | CGG | 338   |
| TAAAACCGCTCTATATTTAA   | 6384 + | CGG | 706   |
| ACCGCTCTATATTTAACGGC   | 6388 + | AGG | 992   |
| TTTAAAAGAATAGCATCATT   | 6436 + | TGG | 1448  |
| TTAAAAGAATAGCATCATTT   | 6437 + | GGG | 569   |
| TAAAAGAATAGCATCATTTG   | 6438 + | GGG | 876   |
| TAATTATTTCAACAAATGAA   | 6470 + | TGG | 80    |
| TTATTTCAACAAATGAATGG   | 6473 + | TGG | 145   |
| TATTTCAACAAATGAATGGT   | 6474 + | GGG | 359   |
| AAAATAATAGCATCATCTA    | 6502 - | TGG | 6725  |
| AACTTTGAAGCTTCTAGAGC   | 6577 + | AGG | 2676  |
| GAACCACAATTTTCTCTTCT   | 6585 - | AGG | 2804  |
| GGACCTAGAAGAGAAAATTG   | 6598 + | TGG | 9     |
| GGTTCTTGTAATTTATTTTC   | 6619 + | AGG | 4593  |
| TGGGAAATTCACCTTTATG    | 6700 - | TGG | 216   |

|                       |        |     |       |
|-----------------------|--------|-----|-------|
| AAATAACTTTATCCACATAA  | 6704 + | AGG | 5790  |
| TAACTTTATCCACATAAAGG  | 6707 + | TGG | 131   |
| AAACTTGGGAACTTGTCTTT  | 6719 - | GGG | 6     |
| AAAACCTTGGGAACTTGTCTT | 6720 - | TGG | 141   |
| AGAAACATTCTCTAAAACCTT | 6733 - | GGG | 270   |
| TAGAAACATTCTCTAAAACCT | 6734 - | TGG | 71    |
| GTTTTAGAGAATGTTTCTAC  | 6754 + | AGG | 1746  |
| TTATTGAAGGCGCATCAAAA  | 6761 - | GGG | 122   |
| ATTATTGAAGGCGCATCAAAA | 6762 - | AGG | 89    |
| GGTATTGATAAAAATTATTGA | 6774 - | AGG | 4     |
| ATGGATCCTATTTTAGGTAA  | 6795 - | AGG | 19    |
| ATAATTATGGATCCTATTTT  | 6801 - | AGG | 230   |
| TCAATACCTTTACCTAAAAT  | 6805 + | AGG | 2687  |
| AGATTGGGGGTGAATAATTA  | 6814 - | TGG | 33    |
| TCGCTATTGCGTTAGATTGG  | 6827 - | GGG | 207   |
| ATCGCTATTGCGTTAGATTG  | 6828 - | GGG | 22    |
| TATCGCTATTGCGTTAGATT  | 6829 - | GGG | 1844  |
| TTATCGCTATTGCGTTAGAT  | 6830 - | TGG | 29    |
| CCATTTGCTTATCTCCTTTC  | 6863 - | TGG | 6046  |
| ATAATAAAAATTATACCAGAA | 6865 + | AGG | 618   |
| CCAGAAAGGAGATAACGAAA  | 6879 + | TGG | 1736  |
| TTAGAACGATAAAAAGAAAG  | 6907 + | TGG | 119   |
| AATTTAAGTGCTAAAGCTAA  | 6970 + | AGG | 882   |
| ATTTAAGTGCTAAAGCTAAA  | 6971 + | GGG | 6999  |
| GCCAATTGTCAGGACGACTT  | 6992 - | AGG | 893   |
| GTGTATATTTGCCAATTGTC  | 7002 - | AGG | 524   |
| TCCTAAGTCGTCCTGACAAT  | 7007 + | TGG | 179   |
| GTAGTTAAACATATGAATGA  | 7048 + | TGG | 1105  |
| GGACAAAATCAATCAATAG   | 7069 + | TGG | 15414 |
| TAGTGCGTTCAAGAACTTA   | 7086 + | TGG | 6731  |
| ATACAAAAAAGAGCTGAAAA  | 7129 + | CGG | 503   |
| GCTGAAAACGGTGTGTTTAA  | 7141 + | AGG | 544   |
| TCCGAAAATGGCATTTCGGT  | 7173 - | TGG | 57    |
| GTTTTCCGAAAATGGCATTT  | 7177 - | CGG | 1545  |
| GATAATCCGTTTTCCGAAAA  | 7185 - | TGG | 25    |
| ACCAACCGAAATGCCATTTT  | 7188 + | CGG | 2625  |
| ATTTTCGGAAAACGGATTAT  | 7203 + | CGG | 4     |
| GAAAACGGATTATCGGCAAAA | 7210 + | CGG | 3     |
| AAAACGGATTATCGGCAAAC  | 7211 + | GGG | 102   |
| GCAAACGGGTTTTCCGAAAA  | 7225 + | CGG | 1     |
| GTTTTCCGAAAACGGAAAAA  | 7233 + | CGG | 2     |
| TATTAGTAGTACGCCTTTTT  | 7244 - | CGG | 317   |
| GGAAAAACGGAAAACCGAAA  | 7246 + | AGG | 103   |

|                       |        |     |       |
|-----------------------|--------|-----|-------|
| AATAACAATACTAATAATGA  | 7312 + | TGG | 1207  |
| TAATGATGGAAGTATATTGT  | 7326 + | CGG | 3     |
| AATGATGGAAGTATATTGTC  | 7327 + | GGG | 688   |
| TAGGGAATGGAATACACAGT  | 7338 - | CGG | 265   |
| GATAATTTCTTTATAGGGAA  | 7351 - | TGG | 4     |
| TATTCGATAATTTCTTTATA  | 7356 - | GGG | 873   |
| GTATTCGATAATTTCTTTAT  | 7357 - | AGG | 541   |
| GAATACTTAAATAAAAAAGC  | 7390 + | AGG | 1     |
| AAGATTTTATTAAAGCAAGA  | 7445 + | TGG | 1749  |
| CAAGATGGAATCAAGATTTT  | 7460 + | AGG | 1117  |
| ATGGAATCAAGATTTTAGGT  | 7464 + | TGG | 742   |
| GAATCAAGATTTTAGGTTGG  | 7467 + | AGG | 9     |
| TTGATATCAAAACAGCTGAA  | 7505 + | TGG | 149   |
| AACAGCTGAATGGTTAAACA  | 7515 + | CGG | 6454  |
| CAAAAAGTGTTCGGTCTA    | 7535 - | AGG | 62    |
| TTACTGCCAAAAGTGTTC    | 7542 - | TGG | 31    |
| CTTAGACCAGAAACACTTTT  | 7552 + | TGG | 8467  |
| ACTTTTTGGCAGTAAATTTG  | 7566 + | AGG | 13    |
| CTTTTTGGCAGTAAATTTGA  | 7567 + | GGG | 32    |
| TTTTTGGCAGTAAATTTGAG  | 7568 + | GGG | 207   |
| TCCAATTGATCCGTGCCAGT  | 7596 - | TGG | 9158  |
| AATCAAAAAATACAACCAAC  | 7597 + | TGG | 686   |
| AAAAATACAACCAACTGGCA  | 7602 + | CGG | 34    |
| ACCAACTGGCACGGATCAAT  | 7611 + | TGG | 15870 |
| TGAAGTACGACGAAAGTTAT  | 7640 + | TGG | 363   |
| GAAGTACGACGAAAGTTATT  | 7641 + | GGG | 1187  |
| CGACGAAAGTTATTGGGATT  | 7647 + | AGG | 48    |
| GACGAAAGTTATTGGGATTA  | 7648 + | GGG | 42    |
| ACGAAAGTTATTGGGATTAG  | 7649 + | GGG | 32    |
| CGAAAGTTATTGGGATTAGG  | 7650 + | GGG | 216   |
| TTTATCTTTTCGCTGAATAG  | 7668 - | TGG | 3500  |
| AATCCTTTTTCGACATGAGT  | 7713 - | AGG | 6141  |
| CAACCTACTCATGTCGAAAA  | 7726 + | AGG | 256   |
| GGATTGAAATGTGAGAGATG  | 7747 + | TGG | 1713  |
| CCATTCGGGTGTTTTTAGT   | 7782 - | AGG | 1810  |
| CTTTATACTCGTAACCATT   | 7796 - | GGG | 5898  |
| TCTTTATACTCGTAACCATT  | 7797 - | CGG | 7939  |
| AATGGTTACGAGTATAAAGA  | 7816 + | CGG | 27    |
| TTGCAAATGTGAAATCTATG  | 7839 + | AGG | 676   |
| ACTGTTGCATCTCTAAAGA   | 7905 - | CGG | 543   |
| TGTACTIONTTTTTCATTTTG | 7941 - | TGG | 9521  |
| ACAGCAATAGAGTACGTACA  | 7990 + | AGG | 56    |
| CCTTGCAATATTAATGATTT  | 8013 - | TGG | 99    |



|                       |        |     |      |
|-----------------------|--------|-----|------|
| CCAAAATCATTAATATTGCA  | 8029 + | AGG | 1309 |
| TTAATATTGCAAGGTTTCATA | 8038 + | CGG | 7009 |
| TTGCAAGGTTTCATACGGAAC | 8044 + | TGG | 14   |
| TTGCGATAGCGTATGCTAGG  | 8057 - | TGG | 30   |
| CTTTTGGCGATAGCGTATGCT | 8060 - | AGG | 184  |
| GCAAAAGCAGTCAAAGCTAA  | 8092 + | AGG | 3    |
| CAAAGCAGTCAAAGCTAAA   | 8093 + | GGG | 8413 |
| AGTCAAAGCTAAAGGGCATA  | 8100 + | CGG | 905  |
| TTGATACGATCCATCAACAT  | 8124 - | TGG | 5946 |
| TATGCACATACCAATGTTGA  | 8130 + | TGG | 720  |
| TTTACTTGTACTAGATGATA  | 8229 + | TGG | 2984 |
| TTACTTGTACTAGATGATAT  | 8230 + | GGG | 481  |
| AGCATTGTTGATAACAGAGT  | 8290 + | AGG | 1375 |
| AACTAAATCAAATATGAAC   | 8351 + | TGG | 2653 |
| GCGAGAAAAGTAAGAGTAAT  | 8404 + | CGG | 1375 |
| GAGTAATCGGAGACGATTC   | 8417 + | AGG | 40   |
| AGTAATCGGAGACGATTTCA  | 8418 + | GGG | 324  |
| ATTCAGGGAGCGAGATGCA   | 8432 + | TGG | 605  |
| TTTAGTTTTTAAAAATTCTT  | 8442 - | TGG | 2337 |
| CGCTCAGAACTCATAGATG   | 8501 + | AGG | 30   |
| GAAACTCATAGATGAGGCAC  | 8507 + | AGG | 22   |
| AGGCACAGGGCGATGAAAAT  | 8521 + | AGG | 122  |
| CTGCAAGTTTTTGGATAAAT  | 8536 - | AGG | 4    |
| CTTAATATTCGACGATAGCG  | 8572 - | GGG | 2057 |
| TCCTTAATATTCGACGATAG  | 8574 - | CGG | 13   |
| CCCGCTATCGTCGAATATTA  | 8589 + | AGG | 63   |
| TATAAGTAATTTTTTCTTT   | 8609 - | CGG | 639  |
| TATCTTCCGTGCCATCTTCT  | 8632 - | CGG | 7828 |
| TATTAATTATACCGAGAAGA  | 8637 + | TGG | 1429 |
| AGATGGCACGGAAGATATTA  | 8654 + | AGG | 58   |
| AATGAAGTTTATTCGCTCAC  | 8700 + | AGG | 6895 |
| TTTCTTTTCGTGCTGAAAT   | 8709 - | GGG | 160  |
| TTTTCTTTTCGTGCTGAAA   | 8710 - | TGG | 4    |
| CAGCGACGAAAAGAAAATCA  | 8732 + | TGG | 12   |
| GAGCGCCTTTGAATCGTTTT  | 8749 - | AGG | 3    |
| AGTGACCTAAAACGATTCAA  | 8760 + | AGG | 6    |
| AAACGATTCAAAGGCGCTCA  | 8769 + | CGG | 4    |
| AACGATTCAAAGGCGCTCAC  | 8770 + | GGG | 427  |
| CTTTTATATGAGCAAGAGCT  | 8793 + | AGG | 351  |
| TTTTATATGAGCAAGAGCTA  | 8794 + | GGG | 1088 |
| CAACGATATTTGATATTTAG  | 8824 + | AGG | 34   |
| CGATATTTGATATTTAGAGG  | 8827 + | TGG | 518  |
| TGATATTTAGAGGTGGCACA  | 8834 + | TGG | 307  |

|                       |        |     |       |
|-----------------------|--------|-----|-------|
| TAAATTTAACGAAACGTTCG  | 8867 + | AGG | 1420  |
| CGAAACGTTCGAGGCACCTA  | 8876 + | TGG | 260   |
| CGTGGACGAGGCGAGCCCAT  | 8876 - | AGG | 153   |
| GAAACGTTTCGAGGCACCTAT | 8877 + | GGG | 2077  |
| GTATTACGAAAGCGTGGACG  | 8888 - | AGG | 91    |
| CTACCTGTATTACGAAAGCG  | 8894 - | TGG | 161   |
| CGTCCACGCTTTCGTAATAC  | 8907 + | AGG | 306   |
| TTATGATTTGTATAAGCTGT  | 8936 - | TGG | 293   |
| AATCATAAAGCGTATATACA  | 8967 + | AGG | 265   |
| GCGCGCTCTAGATTTAACTT  | 8981 - | AGG | 151   |
| TTCGACCATGATTTAAGTAA  | 9032 - | TGG | 1462  |
| ACTTCCATTACTTAAATCA   | 9043 + | TGG | 20484 |
| GAAGAAAAAGAAAAGTGAAA  | 9068 + | TGG | 85    |
| AAAAAGAAAAGTGAAATGGT  | 9072 + | TGG | 7409  |
| TTAATTAAGTTATCGATATC  | 9098 - | CGG | 173   |
| ACAGTATTAGACGCATGTAA  | 9138 + | TGG | 408   |
| ACGCATGTAATGGTCATGTG  | 9148 + | TGG | 83    |
| AGCTAGTTATTTCTGTAATT  | 9166 - | TGG | 1432  |
| ATAACTAGCTCAAAGCGTTA  | 9195 + | TGG | 1156  |
| TCAACTCGCATGATTATTTT  | 9209 - | TGG | 209   |
| AAAAATAATCATGCGAGTTG  | 9227 + | AGG | 2525  |
| TAAACGCAACGATTGATATA  | 9279 + | AGG | 1     |
| TACTGATATTTCAACTTCTGT | 9289 - | AGG | 11770 |
| ATATCAGTATTTTGATGATG  | 9319 + | TGG | 188   |
| GGATATCGAAAAAGAAGCGC  | 9340 + | TGG | 10089 |
| TCATACTCTAGTAATTCGTC  | 9367 - | TGG | 1653  |
| AATTAGAAATGTAAATGTAG  | 9415 + | AGG | 3111  |
| TAGAAATGTAAATGTAGAGG  | 9418 + | TGG | 899   |
| ATGAGTGTTCGTGAAGATTAA | 9446 + | CGG | 217   |
| TCATGTTTCGGTAAATTTATA | 9457 - | TGG | 1470  |
| TATCAATTCATTTTCATGTT  | 9470 - | CGG | 410   |
| AATGAATTGATAAAAAAGAA  | 9497 + | CGG | 1     |
| ATGAATTGATAAAAAAGAAC  | 9498 + | GGG | 272   |
| AAAAAGAACGGGTTAACTCC  | 9509 + | TGG | 67    |
| ACTCTTTTTGCAACCATTC   | 9511 - | AGG | 409   |
| GAACGGGTTAACTCCTGGAA  | 9514 + | TGG | 70    |
| ATGGTTGCAAAAAGAGTACG  | 9533 + | TGG | 15    |
| GTTGCAAAAAGAGTACGTGG  | 9536 + | TGG | 36    |
| AAAAAGAGTACGTGGTGGCT  | 9541 + | GGG | 58    |
| CATGCCATAAGGTGCGTTTA  | 9560 - | AGG | 11    |
| TCAGCTAAGCGCATGCCATA  | 9571 - | AGG | 5268  |
| GAAGCCTTAAACGCACCTTA  | 9572 + | TGG | 609   |
| GCTCTCTCGTTGCATAATTC  | 9614 - | TGG | 137   |

|                       |         |     |       |
|-----------------------|---------|-----|-------|
| GCAAAGAACGTGAAATAGCT  | 9651 +  | AGG | 2787  |
| AGCTAGGCAACGACGTAAAG  | 9667 +  | AGG | 1220  |
| AAGAGGTTGAACTACGTAAG  | 9684 +  | AGG | 285   |
| TGTGGTACATTAACAAATG   | 9694 -  | TGG | 2563  |
| GGATCACGTGAATGTTTTG   | 9712 -  | TGG | 3     |
| TAAGTGACATCGAACCAGTA  | 9733 -  | CGG | 449   |
| AACATTCACGTGATCCGTAC  | 9735 +  | TGG | 2709  |
| CACTCCATTTCTGAACATT   | 9759 -  | TGG | 324   |
| ATAACCAAATGTTCAAGAAA  | 9771 +  | TGG | 447   |
| TCGCCGTATGTGTAATGTGC  | 9849 -  | TGG | 2042  |
| CAACCAGCACATTACACATA  | 9862 +  | CGG | 5183  |
| AGATTTTATTGAACAAGTAA  | 9900 +  | CGG | 4940  |
| ATTGCAAATGCTAATTGTGG  | 9915 -  | TGG | 889   |
| CCTATTGCAAATGCTAATTG  | 9918 -  | TGG | 4104  |
| CCACAATTAGCATTGCAAT   | 9934 +  | AGG | 3966  |
| TCCTCATGACCATTCTTTAA  | 9969 -  | CGG | 5313  |
| TCTAGAGCACCGTTAAAGAA  | 9976 +  | TGG | 1773  |
| ACCGTTAAGAATGGTCATG   | 9984 +  | AGG | 8     |
| AAAGAATGGTCATGAGGATA  | 9990 +  | TGG | 46    |
| TAGATAGAGTGTTTGACTTG  | 10031 + | TGG | 21    |
| AGATAGAGTGTTTGACTTGT  | 10032 + | GGG | 926   |
| TTTACGCGCGTTATCTGTCA  | 10047 - | TGG | 2426  |
| ATCTCTTAGAGCCGAAAAAT  | 10081 - | TGG | 968   |
| GAATACTTAAACCAATTTTT  | 10086 + | CGG | 518   |
| CTCTAAGAGATATCTGTATC  | 10109 + | AGG | 286   |
| AATAAGCGCCATTCACTACA  | 10138 - | TGG | 3974  |
| GCACATATCCATGTAGTGAA  | 10146 + | TGG | 301   |
| AATGGCGCTTATTACTTTCA  | 10164 + | CGG | 5     |
| ATGGCGCTTATTACTTTTAC  | 10165 + | GGG | 633   |
| CATATCGTACCAGATTGGCA  | 10188 + | AGG | 3196  |
| GAAAAAGACATTTGATACAG  | 10214 + | CGG | 30    |
| TTTGATACAGCGGAAGAGCT  | 10224 + | CGG | 122   |
| GGAATATATATAAAGCAACA  | 10245 + | TGG | 719   |
| ATATATAAAGCAACATGGTT  | 10250 + | TGG | 2824  |
| GCAACATGGTTTGAATACG   | 10259 + | AGG | 37    |
| AGCAACTAACTTTATTTTAG  | 10288 + | AGG | 243   |
| TAACCTTATTTTAGAGGAGA  | 10294 + | TGG | 225   |
| TATTAGACGAGTTAATTTAA  | 10350 + | TGG | 448   |
| ATTAGACGAGTTAATTTAAAT | 10351 + | GGG | 10629 |
| TAAATGGGCGCGAGAAAATC  | 10366 + | CGG | 3     |
| ATTTTCCCTTGTGATAGCTC  | 10369 - | CGG | 939   |
| GAAAATCCGGAGCTATCACA  | 10379 + | AGG | 191   |
| AAAATCCGGAGCTATCACAA  | 10380 + | GGG | 986   |

|                       |         |     |       |
|-----------------------|---------|-----|-------|
| TTTTCAACAGGATTTAGTGA  | 10412 + | TGG | 274   |
| GTCGAACACTTATTTGTATT  | 10435 - | TGG | 1764  |
| ACTATGAAGGGGATATCAAT  | 10471 - | TGG | 522   |
| TTTCAATATCAACTATGAAG  | 10482 - | GGG | 134   |
| TTTTCAATATCAACTATGAA  | 10483 - | GGG | 129   |
| TTTTTCAATATCAACTATGA  | 10484 - | AGG | 83    |
| CTTATCAAATACCGTGTCTT  | 10514 - | TGG | 373   |
| AAAAGAAGTAACCAAAGACA  | 10519 + | CGG | 1218  |
| GTTGTTTGAAATGTACGAGA  | 10552 + | TGG | 207   |
| TTTGAAATGTACGAGATGGA  | 10556 + | AGG | 1061  |
| GAAATGTACGAGATGGAAGG  | 10559 + | AGG | 110   |
| ACTAGTGTTCATATAATA    | 10577 - | CGG | 335   |
| AGTATAAAAGAATGTTTATA  | 10613 + | TGG | 3338  |
| AAGATATAGAATGCTTTGGT  | 10630 - | AGG | 2385  |
| GTTTAAGATATAGAATGCTT  | 10634 - | TGG | 14243 |
| ATATGACGATGACGTTAATC  | 10677 + | TGG | 441   |
| ATGACGTTAATCTGGAAAGA  | 10685 + | TGG | 1     |
| TGACGTTAATCTGGAAAGAT  | 10686 + | GGG | 69    |
| GACGTTAATCTGGAAAGATG  | 10687 + | GGG | 1450  |
| AATCTGGAAAGATGGGGAGT  | 10693 + | TGG | 23    |
| GATACAAAGACTTACTTTAT  | 10714 - | AGG | 1794  |
| TTTTGTGCAAAGTACGAATG  | 10797 + | AGG | 10    |
| CAGTTTTAATACCGTATTCG  | 10810 - | TGG | 290   |
| TGAGGAAGAAGCCACGAATA  | 10815 + | CGG | 170   |
| CTATGCTTGACGTTTGGAAC  | 10847 - | GGG | 1331  |
| TCTATGCTTGACGTTTGGAAC | 10848 - | CGG | 26    |
| CGACCTCTATGCTTGACGTT  | 10853 - | TGG | 544   |
| GTTCCAAACTGCAAGCATAG  | 10866 + | AGG | 2090  |
| AAGCATAGAGGTCGAAAAAG  | 10878 + | TGG | 3     |
| CATAGAGGTCGAAAAAGTGG  | 10881 + | AGG | 1126  |
| TCGTCCCACACTCGATATTT  | 10901 - | CGG | 293   |
| TGATGCCGAAATATCGAGTG  | 10912 + | TGG | 1062  |
| CGAGTGTGGGACGAATATAC  | 10926 + | AGG | 294   |
| GGAAGAATACACGATGTTGT  | 10947 + | AGG | 14542 |
| AGTTCACTATGAAAACACTAG | 10991 + | CGG | 2333  |
| GTAGAACTTATGCAAAGTAC  | 11052 + | AGG | 96    |
| AAACAACAACGAAATATATG  | 11087 + | CGG | 1020  |
| AACAACAACGAAATATATGC  | 11088 + | GGG | 3400  |
| CCTATTACAGATTCATCGTC  | 11132 - | TGG | 6742  |
| ATATCTATTGATGTTGTAAA  | 11190 + | TGG | 5662  |
| ATTAAGATTTTATGTTTG    | 11219 + | AGG | 148   |
| TTAAAAGATTTTATGTTTGA  | 11220 + | GGG | 301   |
| ATACTCAAAGTAATCATTTT  | 11235 - | CGG | 64    |

|                      |         |     |      |
|----------------------|---------|-----|------|
| CTCACAGTCATATCTAAGGA | 11271 - | AGG | 2    |
| TAACTCACAGTCATATCTA  | 11275 - | AGG | 116  |
| CTTCCTTAGATATGACTGTG | 11288 + | AGG | 17   |
| AGATATGACTGTGAGGTAA  | 11295 + | AGG | 167  |
| ATTTGAATCATCACATTTAT | 11324 + | TGG | 4288 |
| TGAATCATCACATTTATTGG | 11327 + | AGG | 156  |
| AACAGAATGAACTATGAAAC | 11351 + | AGG | 1266 |
| ACAGAATGAACTATGAAACA | 11352 + | GGG | 726  |
| CAGAATGAACTATGAAACAG | 11353 + | GGG | 1102 |
| TAGCGTCCATTACACCTAGT | 11361 - | TGG | 1430 |
| TATGAAACAGGGGTCCAAC  | 11363 + | AGG | 95   |
| AGGGGTCCAACAGGTGTAA  | 11371 + | TGG | 19   |
| AACTAGGTGTAATGGACGCT | 11379 + | AGG | 84   |
| AAGCAACGTGATGAGCTTAT | 11438 + | TGG | 259  |
| AGCAACGTGATGAGCTTATT | 11439 + | GGG | 323  |
| GCAACGTGATGAGCTTATTG | 11440 + | GGG | 1579 |
| GATGAGCTTATTGGGGATAT | 11447 + | AGG | 45   |
| AAGAGAACGCAACAAAGAGC | 11476 + | TGG | 4166 |
| TGGAGAAGAAAGCAAGTGCA | 11496 + | TGG | 35   |
| GGAGAAGAAAGCAAGTGCAT | 11497 + | GGG | 743  |
| AAAGATTTAATAAACGAATT | 11543 + | TGG | 9    |
| ATAAACGAATTTGGCAAAGA | 11552 + | TGG | 371  |
| GATGGTGAAGAGTTAAATT  | 11570 + | TGG | 1389 |
| TGAAAGAGTTAAATTTGGAA | 11575 + | TGG | 361  |
| ATTAACAATAAAACTTTTA  | 11599 + | TGG | 1466 |
| AAACAATAAAACTTTTATGG | 11602 + | AGG | 2999 |
| CGGATTGTTCTATTTGTTCA | 11626 - | CGG | 610  |
| ATACGCACTAGCACTTATAA | 11646 - | CGG | 109  |
| ATAAGTGCTAGTGCGTATAA | 11667 + | CGG | 109  |
| GTATAACGGCAATGACACAG | 11681 + | AGG | 1982 |
| TATAACGGCAATGACACAGA | 11682 + | GGG | 1256 |
| GGGATTACTAAAAGAGATTG | 11702 + | AGG | 32   |
| AGCGTTTGATGAAATACTTG | 11744 + | AGG | 1373 |
| GCGTTTGATGAAATACTTGA | 11745 + | GGG | 4729 |
| ATTCAACATTCAGTTAAAGA | 11781 + | AGG | 2363 |
| ATTGAACTTGATGAAGCAGT | 11805 + | AGG | 6    |
| TTGAACTTGATGAAGCAGTA | 11806 + | GGG | 26   |
| TGAAGCAGTAGGGATTATGA | 11816 + | CGG | 145  |
| GAAGCAGTAGGGATTATGAC | 11817 + | GGG | 1    |
| TCAAGTTGTCTATAAATATG | 11840 + | AGG | 156  |
| AGTTGTCTATAAATATGAGG | 11843 + | AGG | 179  |
| CTATAAATATGAGGAGGCAC | 11849 + | AGG | 379  |
| AGAGTTATTACAAATACAAA | 11907 + | AGG | 162  |

|                       |         |     |       |
|-----------------------|---------|-----|-------|
| CTATCTCGTAAGTTCAGCGT  | 11931 - | TGG | 2133  |
| ATGTAGTTGAATTCCTTGAA  | 11981 + | TGG | 813   |
| CTTTGAATGGTTTAATACAT  | 11994 + | TGG | 3593  |
| CATTGGAAACGTTTAAGAAC  | 12011 + | TGG | 8762  |
| AAGAACTGGAAGAAGAAACC  | 12025 + | AGG | 220   |
| TGTACGTCTAACGGCTTACC  | 12027 - | TGG | 74    |
| TCATCAAGTTGTACGTCTAA  | 12036 - | CGG | 162   |
| TGATGAATTAGCTGACATGT  | 12069 + | TGG | 1704  |
| TTAGCTGACATGTTGGCGTT  | 12076 + | TGG | 29    |
| TTGAGTATTGCGAATCAAGT  | 12100 + | AGG | 3557  |
| AATTCCTTGAATATTATCTG  | 12222 - | TGG | 533   |
| ATAACAATTGCTTGTTGGTC  | 12249 - | GGG | 74    |
| TCACTATAACAATTGCTTGT  | 12254 - | TGG | 13341 |
| TTTTGTATGCGTCAATGAGT  | 12308 - | TGG | 9713  |
| CATACAAAAAGAAAATGAAA  | 12338 + | AGG | 41    |
| AGGAATCATGAAAGACAAGA  | 12358 + | TGG | 2314  |
| CAAGATGGAACAGCAGACGC  | 12373 + | AGG | 1575  |
| GGAACAGCAGACGCAGGAAA  | 12379 + | AGG | 33    |
| AGACATATTAGATCGAGTCA  | 12412 + | AGG | 18    |
| CATATTAGATCGAGTCAAGG  | 12415 + | AGG | 9707  |
| AGATCGAGTCAAGGAGGTTT  | 12421 + | TGG | 20    |
| ACAACATTCAAAGATTCAAC  | 12466 + | AGG | 896   |
| CTAAAGCTAAGAGTAATCAA  | 12509 + | AGG | 7     |
| TCAAAGGTTTACAGTCGTTG  | 12525 + | AGG | 1529  |
| AGAAGCGAAAGAGAAGTACG  | 12561 + | AGG | 393   |
| AGAGATGCAGTTATTAAGT   | 12595 + | GGG | 1     |
| GTCAGTTGTATGAAAATATA  | 12617 + | AGG | 91    |
| TCAGTTGTATGAAAATATAA  | 12618 + | GGG | 162   |
| TATGAAAATATAAGGGAGTG  | 12625 + | TGG | 1     |
| ATGAAAATATAAGGGAGTGT  | 12626 + | GGG | 532   |
| GTTAAAATTAATAACTATTTT | 12660 + | AGG | 4010  |
| AAAATTAATAACTATTTT    | 12663 + | TGG | 15    |
| CTTTCAACATATTTTCAA    | 12695 - | AGG | 2     |
| GAAAGAATGACGAGTTTTAA  | 12729 + | TGG | 20    |
| GTATCTGTTTTAATATACGT  | 12767 - | TGG | 869   |
| TGAATCAATCACACTTATTG  | 12809 + | AGG | 5605  |
| ATCACACTTATTGAGGAGCA  | 12816 + | TGG | 16    |
| TCACACTTATTGAGGAGCAT  | 12817 + | GGG | 65    |
| CTGAGAATTTTATTACATGA  | 12851 + | CGG | 1651  |
| TTAACGATAGAAAAAGATTA  | 12956 + | TGG | 477   |
| AGAGAACTTGTATTGAACAA  | 12980 + | AGG | 102   |
| TTGAACAAAGGTTATATAGT  | 12992 + | TGG | 140   |
| TGAACAAAGGTTATATAGTT  | 12993 + | GGG | 829   |

|                       |         |     |      |
|-----------------------|---------|-----|------|
| TATAGTTGGGATCAATGTTG  | 13006 + | AGG | 1109 |
| AGTTGGGATCAATGTTGAGG  | 13009 + | AGG | 503  |
| TTTTTCGGGAATTTCATTTT  | 13034 - | AGG | 281  |
| TTATTTTCAGTGACTTTTTTC | 13048 - | GGG | 1554 |
| ATTATTTTCAGTGACTTTTT  | 13049 - | CGG | 80   |
| TCAATCTTAGCTTTTTCTTC  | 13094 - | AGG | 520  |
| TCATTCATATTAGCCATCAT  | 13166 - | AGG | 129  |
| TGAATTTTACAGTCCTATGA  | 13169 + | TGG | 4255 |
| ATATGAATGAACATGAATTA  | 13195 + | AGG | 1005 |
| TATGAATGAACATGAATTAA  | 13196 + | GGG | 886  |
| TCTCCAGTATCAATTAAGT   | 13220 - | AGG | 258  |
| ATGCCTAGTTTAATTGATAC  | 13233 + | TGG | 1890 |
| AGTTTAATTGATACTGGAGA  | 13239 + | TGG | 1190 |
| GATTAAAAACTTAAAAATA   | 13269 + | TGG | 359  |
| AAAACTTAAAAATATGGAT   | 13274 + | TGG | 551  |
| GCTGGAATACTGCGATTATT  | 13312 + | CGG | 249  |
| TAAGTAGCCACTGTGTATAT  | 13350 - | AGG | 133  |
| CATATCGCCTATATACACAG  | 13359 + | TGG | 75   |
| CTTGATGTACTTCTTTGTGT  | 13373 - | TGG | 8380 |
| CAACACAAAGAAGTACATCA  | 13390 + | AGG | 9    |
| AACACAAAGAAGTACATCAA  | 13391 + | GGG | 162  |
| ATAGCGCAGACATACAAGCT  | 13526 + | AGG | 204  |
| ATACAAGCTAGGTTAAAAGT  | 13537 + | AGG | 43   |
| AAAGTAAAAGTTAAGACGAT  | 13564 + | TGG | 103  |
| TTCTTTACTTCGTATAAGAT  | 13599 - | CGG | 259  |
| GATCTTATACGAAGTAAAGA  | 13617 + | AGG | 2398 |
| GCAAGTATATATTATGATGA  | 13718 + | CGG | 138  |
| GACGGCTAATGATGATGTAG  | 13736 + | AGG | 183  |
| CTCAACTTTGCGAAGTCACT  | 13745 - | CGG | 2565 |
| GCGATCAGTCTGATTTGATG  | 13783 + | AGG | 1149 |
| CGATCAGTCTGATTTGATGA  | 13784 + | GGG | 16   |
| TCAGTCTGATTTGATGAGGG  | 13787 + | CGG | 37   |
| GTCTGATTTGATGAGGGCGG  | 13790 + | AGG | 15   |
| GAGTCAATTGTTAATATGAT  | 13836 + | AGG | 829  |
| TGTATTAGCTGATGTAATAC  | 13880 + | CGG | 118  |
| ATTGAATTGCTATCATATTC  | 13883 - | CGG | 913  |
| AGCAATTCAATTGCACAGTA  | 13911 + | TGG | 356  |
| GAGTTTTCCCCTGTGGTTT   | 13934 - | CGG | 106  |
| TACTTGAGTTTTCCCCTTG   | 13940 - | TGG | 4    |
| GCAACGTTGCCGAAACCACA  | 13941 + | AGG | 595  |
| CAACGTTGCCGAAACCACAA  | 13942 + | GGG | 25   |
| AACGTTGCCGAAACCACAAG  | 13943 + | GGG | 71   |
| AAGTTGAAGATGTTGTTGTG  | 13978 + | AGG | 439  |

|                      |         |     |      |
|----------------------|---------|-----|------|
| GGCTTGAGAGAGCAAATAAA | 13999 + | AGG | 73   |
| GTATGCTCAGATGTTAAAAG | 14021 + | AGG | 1867 |
| AAATCAATCGCAACAGAGAT | 14054 + | TGG | 22   |
| AATCAATCGCAACAGAGATT | 14055 + | GGG | 187  |
| TTCTTAGAGTTATTGAAGAA | 14094 + | AGG | 21   |
| TATTGAAGAAAGGTTATAAC | 14104 + | AGG | 388  |
| ATTGAAGAAAGGTTATAACA | 14105 + | GGG | 290  |
| TTTCTGTTCAATTTAGAGTT | 14132 - | AGG | 375  |
| TCTTTTCTGCTAATTCATCA | 14170 - | CGG | 7371 |
| GTAAGAATTATCTTAAGACG | 14303 + | TGG | 37   |
| TAAGAATTATCTTAAGACGT | 14304 + | GGG | 190  |
| AAGAATTATCTTAAGACGTG | 14305 + | GGG | 2562 |
| ATCGATGAGAACATCTAATG | 14318 - | TGG | 4    |
| AAACTACCCACCATATAGGC | 14399 - | AGG | 58   |
| AATTAAACTACCCACCATAT | 14403 - | AGG | 177  |
| TCACTTACTACCTGCCTATA | 14405 + | TGG | 34   |
| CTTACTACCTGCCTATATGG | 14408 + | TGG | 384  |
| TTACTACCTGCCTATATGGT | 14409 + | GGG | 38   |
| CGTTCAATAAATGTGAAAGG | 14452 - | AGG | 896  |
| CTACGTTCAATAAATGTGAA | 14455 - | AGG | 75   |
| AATGCCCTACATCTTGTGC  | 14480 - | AGG | 412  |
| GTAGCTCCTGCACAAGATGT | 14490 + | AGG | 63   |
| TAGCTCCTGCACAAGATGTA | 14491 + | GGG | 117  |
| AGCTCCTGCACAAGATGTAG | 14492 + | GGG | 222  |
| AGCACAACTTTTCTTGCTT  | 14575 - | CGG | 980  |
| AAGCAAGAAAAGTTTGTGCT | 14594 + | AGG | 806  |
| TTTGTGCTAGGACTCATAGA | 14606 + | GGG | 13   |
| CGTCAATATATGCTTTCCGT | 14619 - | TGG | 5994 |
| TCATAGAGGGCAAGAGCCAA | 14619 + | CGG | 180  |
| CGGAAAGCATATATTGACGC | 14639 + | AGG | 301  |
| GGAAAGCATATATTGACGCA | 14640 + | GGG | 11   |
| GACGCAGGGTATTGACTAA  | 14654 + | AGG | 159  |
| TATTCGACTAAAGGTAAGAG | 14663 + | TGG | 58   |
| ATTCGACTAAAGGTAAGAGT | 14664 + | GGG | 110  |
| TTCGACTAAAGGTAAGAGTG | 14665 + | GGG | 9    |
| CGAGTACACTTTTTAAAAAT | 14706 + | CGG | 2    |
| TACACTTTTTAAAAATCGGA | 14710 + | AGG | 7    |
| ACGCAATTTTTCGTACCTTC | 14720 - | CGG | 3387 |
| AAAATCGGAAGGTTTCCGGA | 14721 + | AGG | 44   |
| AAGTAGCTGAACAATCAAAA | 14763 + | TGG | 20   |
| CATATTCTTCAAAGGCCTTT | 14775 - | TGG | 3074 |
| ATCAAAATGGACACGCCAAA | 14776 + | AGG | 54   |
| TAGCCACTCATATTCTTCAA | 14783 - | AGG | 1    |



|                      |         |     |       |
|----------------------|---------|-----|-------|
| AGGCCTTTGAAGAATATGAG | 14796 + | TGG | 82    |
| TAAGAATGACATTGAAATAG | 14833 + | AGG | 3316  |
| AAGAATGACATTGAAATAGA | 14834 + | GGG | 739   |
| TCATACCATCTAAACTAGCG | 14868 - | AGG | 1628  |
| GCATTCCTCGCTAGTTTAGA | 14879 + | TGG | 162   |
| GGTATGAATAGAATGACGTT | 14900 + | AGG | 7156  |
| AAGATTGAACAAATAGATAA | 14978 + | AGG | 4152  |
| CAAATAGATAAAGGTGACAG | 14987 + | TGG | 148   |
| ACAACCTCACGACGCAATAA | 15028 + | CGG | 1378  |
| TAAACTTAAATCTTTATATA | 15068 + | CGG | 10    |
| AGCAAACGCAAAAACAAGAT | 15112 + | TGG | 1215  |
| TGGTTTATGTTAATTAATCA | 15132 + | CGG | 535   |
| AATCACGGAGCAAAGCGTAC | 15147 + | AGG | 6051  |
| CGAAAGATAGCAGACGAAGA | 15219 + | AGG | 410   |
| GCACCAGCAAGTATATATTG | 15236 - | AGG | 175   |
| ACACCTCAATATATACTTGC | 15249 + | TGG | 18831 |
| ATACTTGCTGGTGCAACATT | 15261 + | AGG | 15    |
| ATAGAGTTAACTAACAAATA | 15306 + | TGG | 323   |
| TATAATTCATTCATGTTATT | 15351 + | TGG | 8006  |
| CATGTTATTTGGCGTTCAAG | 15362 + | TGG | 219   |
| GGCGTTCAAGTGGTTCAGAC | 15372 + | AGG | 136   |
| ACAGGTCACAGTAAAGTAAG | 15390 + | TGG | 11    |
| AGTGGTATAGGAGCTATACG | 15408 + | TGG | 53    |
| ATACGTGGTATGACATCGTT | 15423 + | TGG | 205   |
| AGCGTCGTTAGCGCATGAAG | 15461 + | AGG | 40    |
| GAGATTAAGTCACGTTGTAG | 15492 + | TGG | 162   |
| AAGTCACGTTGTAGTGGAAC | 15498 + | TGG | 144   |
| TGGAACGGTGCAAGAATAT  | 15512 + | TGG | 1133  |
| ATGCTCGGGATGGTCAGGGT | 15525 - | TGG | 208   |
| ACCAATGCTCGGGATGGTCA | 15529 - | GGG | 58    |
| AACCAATGCTCGGGATGGTC | 15530 - | AGG | 35    |
| TCAACAACCAATGCTCGGGA | 15535 - | TGG | 165   |
| TCTTTCAACAACCAATGCTC | 15539 - | GGG | 1296  |
| ATCTTTCAACAACCAATGCT | 15540 - | CGG | 1268  |
| ACCCTGACCATCCCGAGCAT | 15544 + | TGG | 23    |
| GAAAATACAGATCCTAAAGC | 15585 + | AGG | 1166  |
| TATTGTCATCGAGCTTAAAT | 15604 - | TGG | 1219  |
| TAGATATAAAGAGTCTATTA | 15656 + | AGG | 126   |
| CGTTCATAGAACATACCTGA | 15671 - | TGG | 624   |
| ATTAAGGCTTCAACACCATC | 15672 + | AGG | 1031  |
| TTCTATGAACGTAATATCAA | 15699 + | CGG | 335   |
| AACGTAATATCAACGGTATG | 15706 + | TGG | 13    |
| ACGTAATATCAACGGTATGT | 15707 + | GGG | 1685  |

|                       |         |     |       |
|-----------------------|---------|-----|-------|
| ATCAACGGTATGTGGGTGTC  | 15714 + | TGG | 29    |
| GGTATGTGGGTGTCTGGTGA  | 15720 + | CGG | 113   |
| ATTCTCATTCAAATCAAAGT  | 15738 - | CGG | 967   |
| TACGATTAAGCAGATGAAC   | 15776 + | TGG | 1244  |
| CCAGCAAAGTATTCTTTGAT  | 15791 - | AGG | 75    |
| CCTATCAAAGAATACTTTGC  | 15807 + | TGG | 309   |
| AATACTTTGCTGGTGTGCGAC | 15817 + | TGG | 145   |
| ATACTTTGCTGGTGTGCGACT | 15818 + | GGG | 29    |
| TACTTTGCTGGTGTGCGACTG | 15819 + | GGG | 5     |
| GACTGGGGTTACGAGCACTA  | 15834 + | TGG | 69    |
| TATGGATCTATTGTGTTAAT  | 15852 + | AGG | 2     |
| TCTATTGTGTTAATAGGACG  | 15858 + | AGG | 42    |
| TTAATAGGACGAGGTATAGA  | 15867 + | TGG | 626   |
| TGGTAACTTTTATTTTATTG  | 15887 + | AGG | 7     |
| AATCATCAATAAACTTAAAT  | 15904 - | TGG | 1726  |
| AATTTAAGTTTATTGATGAT  | 15922 + | TGG | 1243  |
| ATTTAAGTTTATTGATGATT  | 15923 + | GGG | 220   |
| TAAGTTTATTGATGATTGGG  | 15926 + | TGG | 242   |
| AAAGATATTGTAAGTAGATA  | 15957 + | TGG | 51    |
| CGCTGATAAAAGTAACTAT   | 16058 + | CGG | 199   |
| GCTGATAAAAGTAACTATC   | 16059 + | GGG | 16    |
| AAGTAACTATCGGGTGTAG   | 16067 + | AGG | 146   |
| ACTTGTTCTTTATGATAATA  | 16121 + | TGG | 760   |
| TTCTTTATGATAATATGGAT  | 16126 + | AGG | 64    |
| TATGGATAGGTTTAAGCAAG  | 16139 + | AGG | 308   |
| AAGAGGTATTTAAATATGTT  | 16156 + | TGG | 3851  |
| TTATAGGCTCTCCGTTTGTA  | 16165 - | GGG | 100   |
| TTTATAGGCTCTCCGTTTGT  | 16166 - | AGG | 749   |
| TATGTTTGGCACCTACAAA   | 16170 + | CGG | 234   |
| ACGTCATCAAATTCTTTTAT  | 16181 - | AGG | 2986  |
| AAAAGAATTTGATGACGTGT  | 16202 + | TGG | 457   |
| AGGTTTAGTATGTGTGTATA  | 16224 - | TGG | 173   |
| ATACTAAACCTGAACGATTA  | 16252 + | AGG | 590   |
| CTAAACCTGAACGATTAAGG  | 16255 + | AGG | 307   |
| TAAACCTGAACGATTAAGGA  | 16256 + | GGG | 826   |
| AACCTGAACGATTAAGGAGG  | 16258 + | GGG | 1     |
| ATAGATGATATTGAAGCACA  | 16301 + | AGG | 21    |
| ATTAGAGCCTCAATATGCTT  | 16315 - | AGG | 12629 |
| AATATTGCCTAAGCATATTG  | 16324 + | AGG | 26    |
| TAAAGACGATAGAGAGAGAA  | 16363 + | TGG | 173   |
| ATTGGTCGACGTTTGAATAT  | 16411 - | TGG | 3665  |
| AAATCTTCTTTTTCTTCAAT  | 16429 - | TGG | 3083  |
| GAAAAAGAAGATTTTGA AAC | 16454 + | TGG | 526   |

|                       |         |     |      |
|-----------------------|---------|-----|------|
| AAAGAAGATTTTGAAACTGG  | 16457 + | TGG | 5    |
| TTGAAACTGGTGGAAATGTA  | 16467 + | AGG | 65   |
| ACACGTGTTGGTTATTTACA  | 16550 + | TGG | 35   |
| TCATCTAAATCATAAGTAAC  | 16561 - | AGG | 184  |
| ACTATTTCTAATGGCAAAGT  | 16622 - | TGG | 2422 |
| ATCATCAACACTATTTCTAA  | 16631 - | TGG | 3914 |
| TAGAAATAGTGTTGATGATG  | 16651 + | AGG | 984  |
| GATGATGAGGATTCTGAAAT  | 16664 + | AGG | 42   |
| GGATTCTGAAATAGGTAAAA  | 16672 + | TGG | 330  |
| GGTAAAATGGCAGCAATTTG  | 16685 + | CGG | 330  |
| ATGGCAGCAATTTGCGGATA  | 16691 + | TGG | 5    |
| CAATTTGCGGATATGGTGCT  | 16698 + | AGG | 142  |
| TTAGCATATATTGATACGAA  | 16721 + | TGG | 17   |
| TTGATACGAATGGTGATGTT  | 16731 + | AGG | 126  |
| GCCAACAAAATAACATTAT   | 16754 - | AGG | 1062 |
| AAGTAGCGCAATGAGTATGT  | 16792 - | AGG | 1574 |
| TATGAAAAAGATGATGATAA  | 16832 + | TGG | 2415 |
| TATTATGTATTTGAGGAGA   | 16895 + | AGG | 3    |
| ATTGACGCTTTGCAAGAAGT  | 16919 + | TGG | 111  |
| TTGTTAGGTACACCAAACAA  | 16954 - | TGG | 40   |
| TTTGATTACAATCCATTGTT  | 16958 + | TGG | 957  |
| CCTATCATCTCTTTGTTGTT  | 16969 - | AGG | 620  |
| CCTAACAAACAAAGAGATGAT | 16985 + | AGG | 102  |
| GATGATAGGAGATGCTGAAA  | 16999 + | AGG | 4    |
| TACCATACCGCGTAACACA   | 17082 - | AGG | 2994 |
| TTAGCATACCTTGTGTTACG  | 17090 + | CGG | 527  |
| ATACCTTGTGTTACGCGGTA  | 17095 + | TGG | 125  |
| TACCTTGTGTTACGCGGTAT  | 17096 + | GGG | 61   |
| ATTCAAGAAACACAAAAGAG  | 17135 + | TGG | 272  |
| TGAGTTGTTCGACAAAGATA  | 17164 + | TGG | 161  |
| TCTTTTCGATTTCGATCTAAA | 17217 - | TGG | 1840 |
| TTTAATTCTGACGAGTTTAA  | 17285 + | CGG | 270  |
| TTAAGTTTCATTCCAATGAT  | 17299 - | AGG | 22   |
| AACGGAAATGTACCTATCAT  | 17303 + | TGG | 289  |
| TGGAATGAACTTAACTTA    | 17323 + | TGG | 269  |
| GTAAGATGACAGCTATGTTG  | 17376 + | AGG | 3138 |
| TTATCTGCATTAAGCGTAA   | 17417 + | AGG | 1069 |
| TATCTGCATTAAGCGTAAA   | 17418 + | GGG | 362  |
| AAAGCGTAAAGGGTACAAC   | 17428 + | TGG | 90   |
| TACGAGTGAACCTAAATATC  | 17454 - | AGG | 2367 |
| GATTCTTCTAACTTATTAAC  | 17482 - | TGG | 2349 |
| GTTCTGAACTTGTCCCTTC   | 17520 - | AGG | 2075 |
| ACAAGTGCTAATTAACCTGA  | 17521 + | AGG | 92   |

|                      |         |     |       |
|----------------------|---------|-----|-------|
| CAAGTGCTAATTAACCTGAA | 17522 + | GGG | 24    |
| GACAAGTTTCAGAACGAACA | 17544 + | AGG | 380   |
| GTTTCAGAACGAACAAGGTT | 17549 + | AGG | 869   |
| TGATTACGAATTAGACGAAA | 17596 + | TGG | 822   |
| GCGTCACCTTCATCTATGTC | 17635 - | AGG | 472   |
| AAATTACCTGACATAGATGA | 17645 + | AGG | 1215  |
| TCATTCTGATTGGTTATTTT | 17669 - | GGG | 1800  |
| ATCATTCTGATTGGTTATTT | 17670 - | TGG | 13    |
| CTCATCAATATCATTCTGAT | 17679 - | TGG | 578   |
| TGATATTGATGAGTATATCG | 17705 + | AGG | 662   |
| GATATTGATGAGTATATCGA | 17706 + | GGG | 18    |
| TTAGCAAATAGTTGTTCTAT | 17735 - | TGG | 128   |
| ATGATGATGTGTATGTTACA | 17827 + | TGG | 987   |
| CTGAATTCAATAAATACAAC | 17851 + | AGG | 2037  |
| TAAATACAACAGGCTCAATA | 17861 + | AGG | 3439  |
| AATAAGGAGTTAACTCGTAT | 17877 + | AGG | 5323  |
| CATATAAATAAAGGCTCATA | 17962 - | AGG | 1856  |
| GAGCCTTTATTTATATGAAA | 17984 + | TGG | 76    |
| GTTTGATGTTCCGAGTAAAG | 18026 + | AGG | 1233  |
| ATTAAACGAATGAACTCAAT | 18056 - | AGG | 7023  |
| TCACGATGTTTTGTAGTGT  | 18080 - | TGG | 1346  |
| ATACGTATGCACATTACACA | 18135 + | AGG | 14115 |
| ATTACACAAGGTATTATGAG | 18147 + | TGG | 44    |
| ACAAGGTATTATGAGTGGAG | 18152 + | AGG | 134   |
| CAAGGTATTATGAGTGGAGA | 18153 + | GGG | 8     |
| AAAGCAATACGTGATGATGT | 18192 + | CGG | 575   |
| TAAAGCTCAATCATTGCGTG | 18221 + | TGG | 66    |
| GGCAGAGCAATGTCACAAGC | 18258 + | TGG | 70    |
| AGCTGGACTTGATAGCGCAA | 18275 + | TGG | 157   |
| GCAATGGTTGCTAAAGATAA | 18291 + | CGG | 25    |
| GTTTGAAGATGAAGAAACGT | 18313 + | TGG | 4972  |
| GATACTCATCGTCATTTAGA | 18363 + | TGG | 6     |
| ATACTCATCGTCATTTAGAT | 18364 + | GGG | 1     |
| TACTCATCGTCATTTAGATG | 18365 + | GGG | 34    |
| TCATTTAGATGGGGAATCAG | 18374 + | TGG | 50    |
| GATCAGAATTTTAAATCAAG | 18402 + | TGG | 615   |
| ATCAGAATTTTAAATCAAGT | 18403 + | GGG | 2922  |
| TTTAAATCAAGTGGGTGTGT | 18411 + | TGG | 4     |
| TTAAATCAAGTGGGTGTGTT | 18412 + | GGG | 63    |
| ATCAAGTGGGTGTGTTGGGC | 18416 + | AGG | 85    |
| TTTACACCAATAAATAGCTT | 18425 - | GGG | 233   |
| GTTTACACCAATAAATAGCT | 18426 - | TGG | 129   |
| CAGGCGCCCAAGCTATTTAT | 18435 + | TGG | 76    |

|                       |         |     |      |
|-----------------------|---------|-----|------|
| TTACGTGCTCTCATTACAGT  | 18512 - | TGG | 3043 |
| ATGAGAGCACGTAAAGACGA  | 18537 + | TGG | 321  |
| ACTCACGATAAGTCATGAAT  | 18559 - | GGG | 1819 |
| CATTCATGACTTATCGTGAG  | 18577 + | TGG | 482  |
| ATTCATGACTTATCGTGAGT  | 18578 + | GGG | 906  |
| TGGGAGAAATATAAGCGAAA  | 18597 + | AGG | 1287 |
| GAGAAATATAAGCGAAAAGG  | 18600 + | TGG | 242  |
| CGAAAAGGTGGTAATTGATA  | 18612 + | TGG | 380  |
| ATAAAAGTAAATGTTGATAC  | 18643 + | TGG | 3233 |
| CTCTATTATCTCTTCGTACA  | 18682 - | AGG | 3420 |
| AAATGAAGCTGATTTAGATA  | 18759 + | TGG | 666  |
| AGCAGTTTAACGACATGCTA  | 18841 - | AGG | 24   |
| GCTTTTTATTATGCACTTTT  | 18877 + | CGG | 1028 |
| TATGCACTTTTCGGACTGTT  | 18886 + | AGG | 50   |
| ATGCACTTTTCGGACTGTTA  | 18887 + | GGG | 121  |
| CGGACTGTTAGGGTACGCGA  | 18897 + | AGG | 5    |
| GGACTGTTAGGGTACGCGAA  | 18898 + | GGG | 2    |
| AGGGTACGCGAAGGGCAAAA  | 18906 + | AGG | 4    |
| AGAAGTAAAAGATTATCTAA  | 18990 + | AGG | 84   |
| TTATCTAAAGGGACTTAAGA  | 19002 + | CGG | 360  |
| GTGTCTGTTGATGACGTAA   | 19024 + | AGG | 104  |
| GAATGATAACGATCTAATTC  | 19068 - | AGG | 8451 |
| TTAGATCGTTATCATTGAA   | 19090 + | AGG | 396  |
| ATGGAAAGAGAAAAATCTTG  | 19122 + | AGG | 343  |
| ATCTAATCGAACAAAGAAGTA | 19145 + | CGG | 159  |
| TTTTGTTCTTCTGATTGCTC  | 19161 - | AGG | 2121 |
| GTTAGAAAAACGCGACGCAG  | 19224 + | AGG | 940  |
| AAGTTAAGAAGTAACGCGCT  | 19258 + | AGG | 260  |
| TAACGCGCTAGGTAAAGCGC  | 19269 + | AGG | 26   |
| AATCTATCAACTAAGGATGT  | 19287 - | TGG | 195  |
| GCCTAAAAATCTATCAACTA  | 19294 - | AGG | 1770 |
| TCCTTAGTTGATAGATTTTT  | 19309 + | AGG | 576  |
| TTTTTGAACATACTTGTCAA  | 19363 - | AGG | 168  |
| TTTGACAAGTATGTTCAAAA  | 19381 + | AGG | 8    |
| GAGTCTAAATTTAAATCGAG  | 19408 + | TGG | 4418 |
| CAATGGACTTTACATTTGAA  | 19451 - | GGG | 10   |
| TCAATGGACTTTACATTTGA  | 19452 - | AGG | 441  |
| TTCTTTCGCCATTTCTTCAA  | 19468 - | TGG | 1360 |
| TGTAAAGTCCATTGAAGAAA  | 19476 + | TGG | 101  |
| CAATATTAGAAAATAAAGTG  | 19509 + | AGG | 7    |
| TAAAGTGAGGTAATAAAAATA | 19522 + | TGG | 105  |
| ACATTGCCTGGCGTGATGT   | 19534 - | TGG | 103  |
| GCAACTCCAACATACACGCC  | 19544 + | AGG | 260  |

|                       |         |     |      |
|-----------------------|---------|-----|------|
| TCCGATAAAAATAACATTGCC | 19546 - | TGG | 2337 |
| GCCAGGCAATGTTATTTTAT  | 19561 + | CGG | 153  |
| ATTAAGTACCTTGTTCTGC   | 19588 - | TGG | 2180 |
| GGCGTTATTCCAGCAGAACA  | 19595 + | AGG | 171  |
| TTAATCATGAAAGACATTA   | 19621 + | TGG | 305  |
| TTTTCTTTGTGCTGTCAT    | 19663 - | TGG | 873  |
| AAATTTACTTACTTAGCAAA  | 19700 + | AGG | 3    |
| ACTTACTTAGCAAAAGGTGT  | 19706 + | AGG | 143  |
| CAAAGGTGTAGGCGCCTAC   | 19716 + | TGG | 37   |
| AAAAGGTGTAGGCGCCTACT  | 19717 + | GGG | 70   |
| ATTTCTGCTTGTGCATATTC  | 19753 - | AGG | 1812 |
| TGAATATGCACAAGCAGAAA  | 19771 + | TGG | 539  |
| GAAATGGAAGCTAAGAAAAT  | 19787 + | TGG | 1    |
| TTAAGAAACTCTTTTGATAA  | 19804 - | CGG | 256  |
| TGCAAAAGATTTCTTTAATG  | 19849 + | AGG | 352  |
| TAAAATGCCTCTGCAATTAG  | 19861 - | AGG | 189  |
| GGTTAAACCTCTAATTGCAG  | 19870 + | AGG | 24   |
| TAGTACCAAAGATAACAGCT  | 19896 - | TGG | 1175 |
| TTTGACCAAGCTGTTATCTT  | 19907 + | TGG | 1688 |
| CCACTAGTTGAAGTGTGTA   | 19924 - | AGG | 22   |
| CCTTACAACACTTCAACTAG  | 19940 + | TGG | 232  |
| AGTGGTAAACCGCTTGTGTA  | 19958 + | AGG | 283  |
| GTTGAAGGCGCAGAAGAGAA  | 19973 + | AGG | 70   |
| TAGTAGCCATTAATGCCGAA  | 20016 - | AGG | 9    |
| TAATTTATACGTAGACCTTT  | 20017 + | CGG | 1141 |
| GATGAAGAGTTAGATCCAAA  | 20060 + | CGG | 1    |
| TTCCCGTTAGCATCAAATAA  | 20128 - | TGG | 93   |
| AGACCATTATTTGATGCTAA  | 20141 + | CGG | 1    |
| GACCATTATTTGATGCTAAC  | 20142 + | GGG | 2738 |
| TCCGCTCCAGTATAAGATAG  | 20167 - | TGG | 30   |
| GGATTACCACTATCTTATAC  | 20177 + | TGG | 2347 |
| ACCACTATCTTATACTGGAG  | 20182 + | CGG | 9    |
| AAAGAAATCGTTAGCACTAA  | 20218 + | TGG | 1    |
| AAGAAATCGTTAGCACTAAT  | 20219 + | GGG | 721  |
| CGTTAGCACTAATGGGTGAT  | 20226 + | TGG | 6    |
| GTTAGCACTAATGGGTGATT  | 20227 + | GGG | 39   |
| GATTGGGATTACGCACGTTA  | 20243 + | CGG | 2103 |
| GCACGTTACGGTATCTTACA  | 20255 + | AGG | 104  |
| TGCTTGTAACGTCGTTAACG  | 20288 - | TGG | 1535 |
| TTACAAGCATCAGATGCTTC  | 20318 + | TGG | 38   |
| GTTCAAATAATGATACTGGT  | 20325 - | TGG | 1459 |
| TCACGTTCAAATAATGATAC  | 20329 - | TGG | 12   |
| TTAAGCGTTGCGAACGCTTC  | 20401 - | TGG | 13   |

|                        |         |     |      |
|------------------------|---------|-----|------|
| CATATCTCCTCCTATTCAGT   | 20425 - | TGG | 388  |
| AACGCTTAAACCAACTGAAT   | 20431 + | AGG | 533  |
| GCTTAAACCAACTGAATAGG   | 20434 + | AGG | 20   |
| CTGAATAGGAGGAGATATGA   | 20445 + | TGG | 105  |
| TTTACCTTAATATCTTCTGC   | 20457 - | AGG | 431  |
| TAATCCTGCAGAAGATATTA   | 20469 + | AGG | 5    |
| GACTATTACTGTTACAAAGA   | 20508 + | AGG | 15   |
| GACTCTTATTACAGTCTTGT   | 20536 + | CGG | 1728 |
| CAGTCTTGTCGTTACAAAG    | 20547 + | AGG | 163  |
| CGCTCTTATCAGACGTAGTA   | 20564 - | CGG | 1169 |
| AAACTTTTACTCAAGAAAAA   | 20634 + | TGG | 4    |
| TTTACTCAAGAAAAATGGAG   | 20639 + | TGG | 252  |
| TGAAGAAGAAATATTTAAGA   | 20675 + | TGG | 134  |
| ATATTTAAGATGGAAGTTGA   | 20685 + | CGG | 37   |
| ACGGAATACTAGAAGATGTT   | 20704 + | AGG | 655  |
| AACAATGATTTTATGAAAGA   | 20736 + | TGG | 471  |
| ACATACTTTTTGATTGAGTA   | 20756 - | AGG | 441  |
| CAGGTCGTTGATAATACTCT   | 20788 - | AGG | 1085 |
| TTTAAATTCTTTTAACTTC    | 20807 - | AGG | 46   |
| GAATTTAAAGTCAAGAAGTA   | 20837 + | TGG | 114  |
| AATTTAAAGTCAAGAAGTAT   | 20838 + | GGG | 2034 |
| ATTTAAAGTCAAGAAGTATG   | 20839 + | GGG | 2854 |
| GTGTCGTACTTATAACGA     | 20865 + | TGG | 42   |
| ATACTCCACTAATGTAATCA   | 20875 - | GGG | 71   |
| AATACTCCACTAATGTAATC   | 20876 - | AGG | 938  |
| GGTGTCCCTGATTACATTAG   | 20886 + | TGG | 19   |
| ACATTAGTGGAGTATTAAC    | 20899 + | AGG | 227  |
| CTCTACCTTATTGATTTAAA   | 20927 - | CGG | 29   |
| TTCATCCGTTTAAATCAATA   | 20938 + | AGG | 1198 |
| CGTTTAAATCAATAAGGTAG   | 20944 + | AGG | 385  |
| GTGTGAGGGAATTCGTCGTA   | 20968 - | TGG | 48   |
| TTCCAATAGAAATAGTGTGA   | 20982 - | GGG | 5    |
| TTCCCTCACACTATTTCTAT   | 20996 + | TGG | 1532 |
| ATTGGAAGTATCAAAAAAGT   | 21014 + | AGG | 115  |
| ACAAAGCGTTCTTGATAAT    | 21028 - | TGG | 91   |
| GTAAGCGATAAAACAATTAA   | 21065 + | AGG | 14   |
| TAAAACAATTAAAGGATTTA   | 21073 + | TGG | 463  |
| TTTAGTTGTTTACAGATGTAGT | 21085 - | AGG | 2785 |
| GTAAGTCGTAAGGTACATAT   | 21141 - | AGG | 212  |
| TTAGCTATTGGTAAGTCGTA   | 21151 - | AGG | 59   |
| AATAAATTGTTTTAGCTAT    | 21163 - | TGG | 1021 |
| AAACAATTTATTTGAGTATG   | 21190 + | AGG | 40   |
| AACAATTTATTTGAGTATGA   | 21191 + | GGG | 156  |

|                       |         |     |      |
|-----------------------|---------|-----|------|
| GGTAGAATCTTTAGTATTGT  | 21212 + | AGG | 61   |
| TGTAGGCGATTCTGTAGATC  | 21229 + | AGG | 6    |
| GGCGATTCTGTAGATCAGGG  | 21233 + | CGG | 15   |
| TAAACTACTACGACTTAAGC  | 21268 + | AGG | 486  |
| CGTACTTAACTTTTGCCATA  | 21277 - | TGG | 281  |
| CGACTTAAGCAGGTGCCATA  | 21278 + | TGG | 4230 |
| CATATGGCAAAGTTAAGTA   | 21294 + | CGG | 1    |
| TAAGTACGGTGCTGATAGCA  | 21308 + | TGG | 142  |
| TGATAGCATGGTTGTTGAAT  | 21320 + | TGG | 16   |
| TCGATAAGAAAATAGAAGAG  | 21349 + | TGG | 13   |
| CGATAAGAAAATAGAAGAGT  | 21350 + | GGG | 140  |
| ATAGAAGAGTGGGGTTAAAAA | 21360 + | AGG | 12   |
| TCTAAAAAACCTAAGTCAAC  | 21416 - | AGG | 5245 |
| GCATTAGCTCCTGTTGACTT  | 21423 + | AGG | 382  |
| ATTGACTTTAAATATTTCTGA | 21462 + | TGG | 40   |
| GACTTTAAATATTTTCGATGG | 21465 + | TGG | 73   |
| ACTTTAAATATTTTCGATGGT | 21466 + | GGG | 454  |
| TGCGCCGACACTTATAACAC  | 21477 - | TGG | 27   |
| TTATCCAGTGTTATAAGTGT  | 21489 + | CGG | 150  |
| TATGCAATATACGTTGAATA  | 21519 + | CGG | 138  |
| ATATACGTTGAATACGGTAC  | 21525 + | TGG | 15   |
| GGTACTGGTATATATGCTAC  | 21540 + | TGG | 124  |
| GGTATATATGCTACTGGTCC  | 21546 + | TGG | 225  |
| TTTGTAGCACGACTACCACC  | 21548 - | AGG | 1109 |
| ATATATGCTACTGGTCCTGG  | 21549 + | TGG | 77   |
| TGGAGTTTTAAAGGTGATGA  | 21594 + | CGG | 68   |
| TTAAAGGTGATGACGGCGAA  | 21601 + | TGG | 5    |
| GGCGAATGGTACACAACATA  | 21615 + | TGG | 459  |
| GCAGGGTTCCAAAATGGCTG  | 21629 - | TGG | 19   |
| TCAATTGCAGGGTTCCAAAA  | 21635 - | TGG | 9    |
| GTCAAGCGCCACAGCCATTT  | 21637 + | TGG | 30   |
| TGCGTCCTGCGTCAATTGCA  | 21646 - | GGG | 1300 |
| TTGCGTCCTGCGTCAATTGC  | 21647 - | AGG | 423  |
| TGGAACCCTGCAATTGACGC  | 21657 + | AGG | 140  |
| TCGAGCAGTATTTTCATAG   | 21691 + | AGG | 93   |
| AGCAGTATTTTTCATAGAGG  | 21694 + | TGG | 70   |
| CATAGAGGTGGTTAAATATG  | 21706 + | TGG | 1    |
| TATATTTGATTTGTAAGTTC  | 21725 - | AGG | 1983 |
| CAACTAGTTTGTTAATGTTA  | 21766 - | GGG | 30   |
| TCAACTAGTTTGTTAATGTT  | 21767 - | AGG | 47   |
| TTAACAACTAGTTGATGAT   | 21790 + | AGG | 45   |
| TAACAACTAGTTGATGATA   | 21791 + | GGG | 2    |
| ATTCACCCACAACAATATAT  | 21829 - | GGG | 8722 |



|                        |         |     |      |
|------------------------|---------|-----|------|
| GATTCACCCACAACAATATA   | 21830 - | TGG | 280  |
| TGTTTACCCATATATTGTTG   | 21839 + | TGG | 3    |
| GTTTACCCATATATTGTTGT   | 21840 + | GGG | 3591 |
| GCAACAATGAGAGAAACAGT   | 21894 + | CGG | 95   |
| ACAGTTCGCTACACAATACG   | 21938 + | AGG | 363  |
| AAGCTCATTTTAAGCGCGAT   | 21963 + | AGG | 70   |
| TCGTAATTATCTATTTCTAT   | 21986 - | AGG | 494  |
| ATACTGCTTGACTATCGATA   | 22021 - | CGG | 118  |
| TAGTAAACCTGTCTATATCA   | 22045 - | GGG | 179  |
| TTAGTAAACCTGTCTATATC   | 22046 - | AGG | 47   |
| CAGTATTCCCTGATATAGAC   | 22054 + | AGG | 162  |
| ATAGACAGGTTTACTAAGCA   | 22068 + | TGG | 225  |
| TTACTAAGCATGGCACGATA   | 22078 + | CGG | 135  |
| AGACATAAAAAGAAAAACGA   | 22116 + | AGG | 15   |
| AAACGAAGGAGTGTATTTAA   | 22130 + | TGG | 36   |
| GGATCTAAGTCAGTTTCAGC   | 22166 - | TGG | 6933 |
| TTATTAGCTGACTTACAAGA   | 22218 + | AGG | 697  |
| TTAGCTGACTTACAAGAAGG   | 22221 + | TGG | 6    |
| GATTTAGCTGAAATAGTACG   | 22260 + | AGG | 510  |
| AATAGTACGAGGCGGTAAAA   | 22271 + | CGG | 3    |
| AATGATTCTGACATTGCATT   | 22286 - | GGG | 3506 |
| AAATGATTCTGACATTGCAT   | 22287 - | TGG | 44   |
| GAATCATTTAAATTAACAAT   | 22317 + | TGG | 536  |
| TTAACAATTGGTAATGTGCC   | 22329 + | TGG | 43   |
| GCTTCAATTCCTTTATCTCC   | 22331 - | AGG | 108  |
| GGTAATGTGCCTGGAGATAA   | 22338 + | AGG | 4    |
| GTGAAACACGCTGTACAAAC   | 22371 + | AGG | 3135 |
| AAACACGCTGTACAAACAGG   | 22374 + | TGG | 5    |
| CAGGTGGACAGTTGCGTATA   | 22390 + | TGG | 3    |
| GAGCGTAATAAACGTGCAGA   | 22419 + | CGG | 178  |
| GGTAAACATCACGGAATGTT   | 22440 + | TGG | 1151 |
| AATGACATTTCAAATGATTC   | 22457 - | TGG | 985  |
| AACTATCATTA AAAAGTTAAA | 22519 + | TGG | 1429 |
| GCAGCTTCAAACCACTCTTT   | 22556 - | CGG | 86   |
| AAGATAACTTGCCGAAAGAG   | 22561 + | TGG | 46   |
| AAAGAGTGGTTTGAAGCTGC   | 22575 + | AGG | 318  |
| AATTTTTCGTATTCAACTGT   | 22586 - | AGG | 1583 |
| ACAGTTGAATACGAAAAATT   | 22605 + | CGG | 126  |
| GAAAAATTCGGCGAAAAAGT   | 22617 + | CGG | 1    |
| TGTTGTATCTGATTCACACA   | 22667 + | CGG | 3938 |
| ATCTATTAGTTTACATAGAA   | 22678 - | TGG | 69   |
| CTATGTAAACTAATAGATCA   | 22699 + | AGG | 14   |
| TATGTAAACTAATAGATCAA   | 22700 + | GGG | 8    |

|                       |         |     |      |
|-----------------------|---------|-----|------|
| ATGTAACTAATAGATCAAG   | 22701 + | GGG | 5    |
| TGTAACTAATAGATCAAGG   | 22702 + | GGG | 93   |
| AATTTTTTTATAAAAAATA   | 22717 - | GGG | 1    |
| TTTATAAAAAAATTGAAAAG  | 22742 + | AGG | 96   |
| TTAATTTTTAATGTTGTAAT  | 22772 - | TGG | 712  |
| ACAACATTAATAAATTAATGA | 22794 + | CGG | 220  |
| CTGAGAATTTTTTCAGCTTTT | 22846 - | CGG | 1153 |
| TTCTCAGAAGATAGCGAAGA  | 22878 + | TGG | 2    |
| TCTCAGAAGATAGCGAAGAT  | 22879 + | GGG | 51   |
| GATAGCGAAGATGGGAGAAA  | 22887 + | AGG | 2    |
| GGGAGAAAAGGAGCAATGCC  | 22899 + | AGG | 50   |
| TTAAATATAACATTGAATCC  | 22901 - | TGG | 524  |
| GGATTCAATGTTATATTTAA  | 22920 + | CGG | 52   |
| CTAATTGTTCTCGAGTTGGT  | 22993 - | GGG | 494  |
| TCTAATTGTTCTCGAGTTGG  | 22994 - | TGG | 3    |
| TTTTCTAATTGTTCTCGAGT  | 22997 - | TGG | 2580 |
| TGATTTCACTACTGAAAACG  | 23045 + | AGG | 11   |
| TCCAAAGCCCCTTGTAAATA  | 23060 - | CGG | 148  |
| GATACTTTGCCGTTATTACA  | 23067 + | AGG | 406  |
| ATACTTTGCCGTTATTACAA  | 23068 + | GGG | 4    |
| TACTTTGCCGTTATTACAAG  | 23069 + | GGG | 1    |
| GCCGTTATTACAAGGGGCTT  | 23075 + | TGG | 114  |
| ACAATAGTGGTTTTTTCAAG  | 23107 + | AGG | 3    |
| CAATAGTGGTTTTTTCAAGA  | 23108 + | GGG | 3    |
| AGAGGGAGAGTCGCTCGTAC  | 23125 + | TGG | 124  |
| TCCTCGCTTTTGCCATATT   | 23150 - | CGG | 39   |
| ATTGAACAAAGCACCGAATA  | 23153 + | TGG | 39   |
| CATTTCTTTGTCCTCGCTTT  | 23160 - | TGG | 17   |
| ACCGAATATGGCCAAAAGCG  | 23165 + | AGG | 98   |
| GACAAAGAAATGACGAAAGC  | 23187 + | AGG | 758  |
| AATGATGAAAGAGAATTACA  | 23216 + | AGG | 50   |
| AGAGAATTACAAGGAAATCA  | 23225 + | TGG | 50   |
| GAGAATTACAAGGAAATCAT  | 23226 + | GGG | 501  |
| TATTTTTGAGTAATCGTGTA  | 23240 - | AGG | 98   |
| TACACGATTACTCAAAAATA  | 23259 + | AGG | 5    |
| CAACTGACAGCTAGATATTT  | 23282 + | AGG | 492  |
| GTGCTAACAATTCATGTTCA  | 23295 - | GGG | 21   |
| AGTGCTAACAATTCATGTTCA | 23296 - | AGG | 277  |
| AGCCAATCACGCCATTCAGC  | 23323 - | AGG | 74   |
| TAGCACTAACACCTGCTGAA  | 23328 + | TGG | 203  |
| CACCTGCTGAATGGCGTGAT  | 23337 + | TGG | 10   |
| TGGCGTGATTGGCTTATTGG  | 23348 + | TGG | 17   |
| TGATTGGCTTATTGGTGGTC  | 23353 + | AGG | 21   |

|                      |         |     |       |
|----------------------|---------|-----|-------|
| GGCTTATTGGTGGTCAGGAT | 23358 + | AGG | 48    |
| TTAATAATTGTCTTTGATCT | 23367 - | AGG | 284   |
| ATTGAACAAGCGCAAGCTAA | 23405 + | CGG | 494   |
| GCTTAGTACAAGCTTCTAAG | 23427 + | AGG | 43    |
| CGTTACGAAATAAGAGAACC | 23483 + | TGG | 195   |
| TGTACACGAGCATAGCTACC | 23485 - | AGG | 13101 |
| GCTAACCTCCTTTCGATTCA | 23571 - | AGG | 4     |
| AGAAAATTCCTTGAATCGAA | 23579 + | AGG | 85    |
| AAATTCCTTGAATCGAAAGG | 23582 + | AGG | 4     |
| GCCATAAAATGAGTATCCAA | 23593 - | AGG | 931   |
| ATCGAAAGGAGGTTAGCCTT | 23593 + | TGG | 97    |
| GCCTTTGGATACTCATTTTA | 23608 + | TGG | 361   |
| TCATTTTATGGCAAAGATTA | 23620 + | TGG | 78    |
| GAGCTTTCCTTACGTTGCTT | 23643 - | TGG | 81    |
| GAGATTTCCAAAGCAACGTA | 23652 + | AGG | 979   |
| ACATCTGTTTCAATTCGTT  | 23689 - | TGG | 1222  |
| TAGCGCGTTGTAAAGCTCTT | 23733 - | TGG | 144   |
| TTTACAACGCGCTAAATCAA | 23758 + | TGG | 386   |
| CTAAATCAATGGCTCAACGA | 23769 + | TGG | 1204  |
| CTAAAGCTACTGTGGAAGCT | 23937 + | TGG | 34    |
| GAGAAAACATGTTGTTAAGT | 23959 + | TGG | 40    |
| CTTTAACCGCCATTTTAGCG | 23979 - | GGG | 90    |
| CCTTTAACCGCCATTTTAGC | 23980 - | GGG | 576   |
| CCCTTTAACCGCCATTTTAG | 23981 - | CGG | 2     |
| AGATGCAAACCCCGCTAAAA | 23986 + | TGG | 10    |
| TGCAAACCCCGCTAAAATGG | 23989 + | CGG | 141   |
| AAGATTTAATAGATCTTAGC | 24027 + | AGG | 7112  |
| ATTTCTAATTTCCATCTGC  | 24053 - | TGG | 3656  |
| TTGATATTGATTCCAGCAGA | 24057 + | TGG | 30    |
| GATTCCAGCAGATGGAAATT | 24065 + | AGG | 2     |
| AAAGAATTCAATGAAGTCGA | 24101 + | AGG | 3     |
| GGAGCAGTTAAACGTTCTTT | 24122 + | CGG | 42    |
| ATTATGAGAAAAGAAGTAAA | 24158 + | TGG | 3     |
| TAAATGGAACAAGTGATATT | 24174 + | TGG | 673   |
| AAATGGAACAAGTGATATTT | 24175 + | GGG | 2     |
| AATGGAACAAGTGATATTTG | 24176 + | GGG | 13    |
| AACAACCTATTGAAAGATTA | 24206 + | CGG | 256   |
| GAAAGATTACGGCGAGAAAA | 24217 + | TGG | 87    |
| AGTTCGGATTTTAGTAGCTA | 24227 - | AGG | 129   |
| CGAAGATAGTACCGAAAGTT | 24243 - | CGG | 19    |
| GCTACTAAAATCCGAACTTT | 24248 + | CGG | 61    |
| CGGTACTATCTTCGCGCAAC | 24268 + | AGG | 335   |
| ATCTTCGCGCAACAGGTCAA | 24275 + | AGG | 57    |

|                      |         |     |      |
|----------------------|---------|-----|------|
| GGTACTAATCCGGCAATCAC | 24313 - | TGG | 68   |
| GCATTGATACCAGTGATTGC | 24320 + | CGG | 575  |
| CATTATTGCAGGTAATAATC | 24323 - | CGG | 28   |
| TTAAGTACTGCCATTATTGC | 24334 - | AGG | 256  |
| CGGATTAGTACCTGCAATAA | 24340 + | TGG | 54   |
| AATAATGGCAGTACTTAATG | 24355 + | CGG | 1    |
| ATGGCAGTACTTAATGCGGT | 24359 + | TGG | 12   |
| CTTAATGCGTTGGTGTATT  | 24368 + | AGG | 32   |
| GCGGTTGGTGTATTAGGTGG | 24374 + | TGG | 2    |
| GTTGGCGCATTCTCTGTCGC | 24410 + | AGG | 8    |
| GCATTCTCTGTCGCAGGTCT | 24416 + | TGG | 93   |
| GTCGCAGGTCTTGGAGTTGT | 24425 + | TGG | 20   |
| GGTCTTGGAGTTGTTGGCTT | 24431 + | TGG | 17   |
| AGTTGTTGGCTTTGGTGCAA | 24439 + | TGG | 107  |
| GGCTATTAGCGCTCTAAAA  | 24460 + | TGG | 84   |
| GCTCTTAAATGGTTGAAGA  | 24470 + | TGG | 7    |
| AATGGTTGAAGATGGAACAT | 24478 + | TGG | 17   |
| GCGATCAGTTAAAACTACA  | 24537 + | TGG | 518  |
| ATCTTTAATGCGATGTCAGC | 24590 + | AGG | 3099 |
| GCGATGTCAGCAGGTATCAG | 24599 + | AGG | 73   |
| ATAGATACTTCAGATAAGAA | 24634 - | TGG | 323  |
| AGCAAACGCACGCAAGTTTG | 24682 + | AGG | 65   |
| ACGCACGCAAGTTTGAGGAT | 24687 + | TGG | 6    |
| CGCACGCAAGTTTGAGGATT | 24688 + | GGG | 36   |
| TTTGAAGCATTGAATAGCAT | 24740 + | AGG | 49   |
| AGCATAGGTGGCGCAATCTT | 24755 + | CGG | 3    |
| GGAGATTTATTGAACGCTGC | 24776 + | AGG | 6    |
| TTGAACGCTGCAGGAAGATT | 24785 + | TGG | 109  |
| TGAGACACAAATTTGAACAA | 24826 - | CGG | 27   |
| TTGTTCAAATTTGTGTCTCA | 24845 + | AGG | 235  |
| AGCCCAATTTTGGAAAGCTA | 24866 - | TGG | 80   |
| CCACACTATTAGCCCAATTT | 24876 - | TGG | 38   |
| TGTCCATAGCTTTCCAAAAT | 24879 + | TGG | 3    |
| GTCCATAGCTTTCCAAAATT | 24880 + | GGG | 22   |
| CCAAAATTGGGCTAATAGTG | 24892 + | TGG | 12   |
| AATTGGGCTAATAGTGTGGC | 24896 + | TGG | 12   |
| ACCACTAACTTACCTAAGAT | 24953 + | TGG | 594  |
| CCTAAGATTGGTCAGATATT | 24965 + | TGG | 16   |
| ATATTTGGCAATGTGTTCGC | 24980 + | TGG | 1064 |
| GGCAATGTGTTGCTGGTAT  | 24986 + | TGG | 493  |
| ACAGTTCTAACATTTTTGAC | 25035 + | TGG | 180  |
| TAACTTCTCAATTTAGAGCA | 25068 + | TGG | 57   |
| AGAGCATGGTCAGAACAAGT | 25082 + | AGG | 39   |

|                       |         |     |      |
|-----------------------|---------|-----|------|
| GAACAAGTAGGACAATCACA  | 25094 + | AGG | 3    |
| ATCAGTTACGTTCAAGAGAA  | 25130 + | TGG | 15   |
| CCGATTAAGTGCATAATAGT  | 25138 - | AGG | 3611 |
| CCTACTATTATGCAGTTAAT  | 25154 + | CGG | 179  |
| TAATATCGTAAAAGCGTTAG  | 25177 + | TGG | 178  |
| GTAAAAGCGTTAGTGGCATT  | 25184 + | TGG | 1430 |
| AGTGGCATTGGTACTGCAA   | 25195 + | TGG | 7    |
| TCTAGTAATTTACTAGCTAT  | 25204 - | AGG | 47   |
| GATTTTCGTTACTAATTTAGC | 25241 + | TGG | 4    |
| TGGGTGTGCTTCGAATAGTT  | 25256 - | TGG | 40   |
| CGATAATTTGAGCGACTGCT  | 25275 - | GGG | 135  |
| CCGATAATTTGAGCGACTGC  | 25276 - | TGG | 411  |
| CCAGCAGTCGCTCAAATTAT  | 25292 + | CGG | 4    |
| GCTCAAATTATCGGTGTTAT  | 25301 + | CGG | 52   |
| ATCGGTGTTATCGGTATTTT  | 25310 + | AGG | 46   |
| GTATTTTAGGTGGCGTATTT  | 25323 + | TGG | 5    |
| TATTTTAGGTGGCGTATTTT  | 25324 + | GGG | 24   |
| TGGCGTATTTTGGGCTTTAA  | 25333 + | TGG | 267  |
| AACTGCTAACAGCTGCAAT   | 25342 - | CGG | 1200 |
| CTGGATTTAACTAGAATAAC  | 25430 + | TGG | 5    |
| TGGATTTAACTAGAATAACT  | 25431 + | GGG | 432  |
| GGATTTAACTAGAATAACTG  | 25432 + | GGG | 41   |
| TTAACTAGAATAACTGGGG   | 25435 + | TGG | 7    |
| GGGGTGGTAAGTAAAGCGTT  | 25451 + | CGG | 3    |
| AAAGCGTTCGGTTTATTGAC  | 25463 + | TGG | 2    |
| GTGCTTTCACAAGTATTTCT  | 25485 + | TGG | 1559 |
| ACTGCAACTACTGCTAATAT  | 25492 - | TGG | 998  |
| GCAGTCATTGGTGTATTCAT  | 25526 + | TGG | 109  |
| TTGGTATTCTTGTATTTA    | 25545 + | TGG | 7    |
| GAAAAACAATAACAGAAGCT  | 25587 + | TGG | 3060 |
| ACAATAACAGAAGCTTGGAA  | 25592 + | CGG | 138  |
| GGTATTAACAGCAGTTTC    | 25613 + | CGG | 59   |
| TACTACACCTGAATCGCAC   | 25616 - | CGG | 120  |
| GCAGTTTCCGGTGCATTCA   | 25625 + | AGG | 1    |
| CGATTCAAGGTGTAGTAGAT  | 25638 + | TGG | 184  |
| TAGATTGGTTAACTCAATTG  | 25653 + | TGG | 249  |
| AGATTGGTTAACTCAATTGT  | 25654 + | GGG | 16   |
| GATTGGTTAACTCAATTGTG  | 25655 + | GGG | 65   |
| TGTCCTAATACTTGTAATAT  | 25693 - | AGG | 293  |
| ATGCCTATATTACAAGTATT  | 25706 + | AGG | 23   |
| CATGCAAGTTTTAGGTGTTT  | 25738 + | TGG | 103  |
| GTTTTAGGTGTTTTGGTAAT  | 25745 + | AGG | 11   |
| AATGTTATGAATATCATACA  | 25778 + | AGG | 5    |

|                        |         |     |      |
|------------------------|---------|-----|------|
| TGAATATCATACAAGGTTTG   | 25785 + | TGG | 82   |
| ATATCACTGTTCTATGGCT    | 25812 - | TGG | 206  |
| TACGGATACACTGTTCTTA    | 25817 - | TGG | 71   |
| ACAATTGCGTTCCAAGCCAT   | 25817 + | AGG | 23   |
| TACTATGATTTGGACAGCTA   | 25835 - | CGG | 3    |
| TGAATAAACCTACTATGATT   | 25845 - | TGG | 60   |
| GTAGCTGTCCAAATCATAGT   | 25853 + | AGG | 41   |
| GCTTTAATTCAGTTGCTTAC   | 25886 + | TGG | 1274 |
| TTGCTTACTGGCGACTTCTC   | 25898 + | AGG | 7    |
| CTGGCGACTTCTCAGGTGCT   | 25905 + | TGG | 11   |
| TGGCGACTTCTCAGGTGCTT   | 25906 + | GGG | 16   |
| CCAAATCGTATCAAGTACAT   | 25934 - | TGG | 2239 |
| CCAATGTACTIONGATACGATT | 25950 + | TGG | 500  |
| GGCAATACATGCAATCAGTT   | 25971 + | TGG | 937  |
| TCAGTTTGGGAGTCAATTAT   | 25985 + | CGG | 18   |
| TCAATTATCGGCTTTTTAAC   | 25997 + | TGG | 28   |
| AATCGAACGCTTTCAATGTT   | 26027 + | TGG | 52   |
| TTTCAATGTTTGGTACAAGT   | 26037 + | TGG | 36   |
| GTACAAGTTGGTCACAGATA   | 26049 + | TGG | 13   |
| CTAATTTTGTAGCAGTATT    | 26082 + | TGG | 27   |
| TTTGGAGCACTGTTACAAGT   | 26100 + | TGG | 987  |
| GTTGGTTCAGTCGTGTTGCT   | 26118 + | TGG | 790  |
| CAGTCGTGTTGCTTGGAGTG   | 26125 + | TGG | 22   |
| TTGGAGTGTGGCTGAAAAAA   | 26137 + | TGG | 1    |
| TGGAGTGTGGCTGAAAAAAT   | 26138 + | GGG | 18   |
| CTGAATGGGTTTCTAACATT   | 26193 + | TGG | 240  |
| TTCGCGAGTAAAGTAGCTGA   | 26231 + | TGG | 128  |
| TCGCGAGTAAAGTAGCTGAT   | 26232 + | GGG | 289  |
| AAAAGAGTTGTCTCAAATGT   | 26258 + | AGG | 6    |
| GTTGTCTCAAATGTAGGTGA   | 26264 + | CGG | 237  |
| GACGGTATGAGTGATGCACT   | 26282 + | TGG | 422  |
| TTCAGTGATTTCTTAAATGC   | 26321 + | CGG | 703  |
| TTTGCCGATTAATTCCGCTC   | 26324 - | CGG | 67   |
| TGATTTCTTAAATGCCGGAG   | 26326 + | CGG | 58   |
| AATGCCGGAGCGGAATTAAT   | 26336 + | CGG | 40   |
| ATTAATCGGCAAAGTAGCTG   | 26350 + | AGG | 126  |
| TTAATCGGCAAAGTAGCTGA   | 26351 + | GGG | 34   |
| GACTACTTTGTGCGCAGCAT   | 26363 - | TGG | 83   |
| TGCGCACAAAGTAGTCAGCG   | 26386 + | CGG | 78   |
| CACAAAGTAGTCAGCGCGGT   | 26390 + | AGG | 258  |
| GCGATGCGATTTTCATCAGCT  | 26412 + | TGG | 12   |
| CGATGCGATTTTCATCAGCTT  | 26413 + | GGG | 3    |
| TCTGTAACCTTCATTCGTAAG  | 26438 + | TGG | 34   |

|                       |         |     |      |
|-----------------------|---------|-----|------|
| ACTTCATTCGTAAGTGGACA  | 26444 + | CGG | 9    |
| CACGGTGGAGGTAGTAGCTT  | 26462 + | AGG | 21   |
| GGAGGTAGTAGCTTAGGTAA  | 26468 + | AGG | 6    |
| TAGCTTAGGTAAAGGTTTGT  | 26476 + | CGG | 102  |
| AAAGTAATTGCTACAGACTT  | 26510 + | TGG | 65   |
| AGAGGATAGCTCTTATTAA   | 26522 - | AGG | 172  |
| TATACTATCTGTCAAAGTAG  | 26540 - | AGG | 322  |
| CTGTCTATAGAAGTACTTAC  | 26569 - | AGG | 642  |
| CTAATCGTTACATTCACAAT  | 26638 - | AGG | 1452 |
| GAATGTAACGATTAGAAATG  | 26662 + | AGG | 34   |
| AATGTAACGATTAGAAATGA  | 26663 + | GGG | 22   |
| TGCGTGATTTAATTAATCA   | 26673 - | AGG | 1    |
| GAAGTTTCAACTTATTATAA  | 26736 + | GGG | 11   |
| GTTTCAACTTATTATAAGGG  | 26739 + | AGG | 9    |
| CGCACGATATAGAAGTAATA  | 26777 + | AGG | 157  |
| TCCAAGTGATTATAAGTGAA  | 26814 - | AGG | 43   |
| TCCTTTCACCTATAATCACT  | 26829 + | TGG | 2318 |
| GTAGTTGAATATAACGTTAC  | 26854 + | AGG | 663  |
| GAATATAACGTTACAGGCGC  | 26860 + | AGG | 22   |
| TCGTAACCTATTCTGATATAG | 26889 + | AGG | 54   |
| CGTAACTATTCTGATATAGA  | 26890 + | GGG | 141  |
| TCTGATATAGAGGGTATTGA  | 26899 + | TGG | 38   |
| AAAAAGTAGAGCTTAAGATA  | 26954 + | AGG | 397  |
| TGTGAAGCATAAGCAATTTT  | 26970 - | AGG | 279  |
| AACGTCCAGCAAATAGTGCT  | 27008 - | TGG | 187  |
| GACGTCCAAGCACTATTTGC  | 27019 + | TGG | 252  |
| TTGCTGGACGTTTTTATTTA  | 27035 + | AGG | 1    |
| TGCTGGACGTTTTTATTTAA  | 27036 + | GGG | 3    |
| TCATACTTAATTGAATTGTC  | 27063 - | TGG | 239  |
| TCAAATGCTTGTGTTGCTTT  | 27102 - | TGG | 62   |
| TTTGAGCTTGATTATGTTGA  | 27136 + | TGG | 48   |
| GATGGACGACAACTTTTTGT  | 27154 + | AGG | 2505 |
| TTTGACACAACACAAACATC  | 27196 + | AGG | 496  |
| TTGACACAACACAAACATCA  | 27197 + | GGG | 1092 |
| TGACACAACACAAACATCAG  | 27198 + | GGG | 238  |
| ACTTTCAAAGTATGGTAGTT  | 27229 - | CGG | 78   |
| TAACCGACACTTTCAAAGTA  | 27237 - | TGG | 190  |
| CTACCATACTTTGAAAGTGT  | 27250 + | CGG | 218  |
| CAGGTACCGACCATTTTTCA  | 27287 - | GGG | 619  |
| TCAGGTACCGACCATTTTTTC | 27288 - | AGG | 7    |
| GTAATAACGACCCTGAAAAA  | 27293 + | TGG | 4    |
| TAACGACCCTGAAAAATGGT  | 27297 + | CGG | 422  |
| TCGTTTGTAGGCAATCTATC  | 27306 - | AGG | 98   |

|                       |         |     |      |
|-----------------------|---------|-----|------|
| CTCTTATCACCTTCGTTTGT  | 27318 - | AGG | 26   |
| GATAGATTGCCTACAAACGA  | 27325 + | AGG | 40   |
| CTACAAACGAAGGTGATAAG  | 27335 + | AGG | 80   |
| ACATTTTACAACACTAACTC  | 27367 + | AGG | 1618 |
| AACTGATTAACTGTGTAA    | 27399 - | AGG | 59   |
| AGATGTAAAGCTAATGATA   | 27465 + | AGG | 450  |
| GTAAAGCTAATGATAAGGA   | 27469 + | TGG | 1    |
| TTCACCTTCTATACAGATAA  | 27493 + | AGG | 15   |
| AGGAAATATCTCAGTTATTA  | 27513 + | AGG | 354  |
| AAGGAAGTTGATTTAAAAGC  | 27532 + | CGG | 55   |
| GTCGAAGATTATTTTATCTC  | 27535 - | CGG | 1098 |
| GGAGATAAAATAATCTTCGA  | 27553 + | CGG | 58   |
| TATATTTAAATAACCTCTAT  | 27568 - | AGG | 1203 |
| GACGGTAAACATACCTATAG  | 27571 + | AGG | 272  |
| TAATAAAACTTTAGAACAAAC | 27615 + | CGG | 205  |
| TTCCAGCCTGGATATAAAAC  | 27618 - | CGG | 9    |
| GAACAACCGGTTTTATATCC  | 27628 + | AGG | 300  |
| GACTTGAATCGATTCCAGCC  | 27630 - | TGG | 18   |
| AACCGGTTTTATATCCAGGC  | 27632 + | TGG | 47   |
| CACAAATTATATTTTAGATA  | 27700 + | AGG | 148  |
| CTTTTAATAAAAATTGGCAT  | 27712 - | AGG | 156  |
| TGTAGACTTTTTAATAAAAT  | 27718 - | TGG | 2    |
| AATTTTATTA AAAAGTCTAC | 27736 + | AGG | 132  |
| ATTTTATTA AAAAGTCTACA | 27737 + | GGG | 31   |
| TTAAAAGTCTACAGGGTGT   | 27743 + | AGG | 2    |
| TAAAAGTCTACAGGGTGTA   | 27744 + | GGG | 18   |
| CGCTATTAATGTTAGTACAA  | 27769 + | AGG | 1626 |
| GCTAAATGAAGATAGTTCTT  | 27802 + | TGG | 588  |
| GCGAGTACGTTTGACGCAAT  | 27845 + | AGG | 58   |
| TGGACGATCACTCATGTTGA  | 27884 + | AGG | 23   |
| ATACTTGATAAGTCTACTAT  | 27938 + | TGG | 1156 |
| CTACTATTGGCGAAAAAATA  | 27951 + | AGG | 1    |
| TAAGGCTTGATATCAAAGCT  | 27969 + | AGG | 5    |
| GGTAAATCCTAGAATTGTTA  | 27993 - | AGG | 417  |
| TTGATGACCTTAACAATTCT  | 28002 + | AGG | 5    |
| TAAAACCTTCGTTATACTCT  | 28014 - | TGG | 337  |
| GAGTATAACGAAAGTTTTAC  | 28034 + | AGG | 7    |
| TTCTTCAATACTGTCTTTAA  | 28064 + | AGG | 596  |
| CAATACTGTCTTTAAAGGAA  | 28069 + | CGG | 22   |
| AATACTGTCTTTAAAGGAAC  | 28070 + | GGG | 10   |
| AATTTAGATGCATCTACTTT  | 28096 - | TGG | 213  |
| AGTAGATGCATCTAAATTCG  | 28117 + | AGG | 2    |
| GTAGATGCATCTAAATTCGA  | 28118 + | GGG | 6    |



|                       |         |     |      |
|-----------------------|---------|-----|------|
| GCATCTAAATTCGAGGGATT  | 28124 + | AGG | 23   |
| AAATTCGAGGGATTAGGCAA  | 28130 + | AGG | 1    |
| CGATTAGAAATCTTTAAAAA  | 28160 + | AGG | 2    |
| ACCAGCTTTAATGTAATAAT  | 28247 - | TGG | 26   |
| GCCAATTATTACATTAAAGC  | 28262 + | TGG | 6    |
| ATCACCATAACCTTTAATAA  | 28319 - | AGG | 43   |
| AAATGTTATACCTTTATTAA  | 28325 + | AGG | 27   |
| TATACCTTTATTAAGGTTA   | 28331 + | TGG | 1    |
| CAACAGACTTTTGCAGAAGC  | 28367 + | GGG | 191  |
| TTACCTATCAATTGTGCTAA  | 28396 - | TGG | 33   |
| CATCCATTAGCACAAATTGAT | 28409 + | AGG | 1493 |
| ATACGTCCATCAACAAGCGG  | 28429 - | TGG | 525  |
| TTAATACGTCCATCAACAAG  | 28432 - | CGG | 813  |
| GAAGCGCCACCGCTTGTTGA  | 28439 + | TGG | 205  |
| AGATAGTTTAAAAAAGCAA   | 28477 + | TGG | 145  |
| ACGTAACGCTACAAAGTCTA  | 28520 - | AGG | 379  |
| CTATTTTAGGGTTAGCTTCT  | 28551 - | GGG | 49   |
| TAACAACATCACCTATTTTA  | 28563 - | GGG | 234  |
| CTAACAACATCACCTATTTT  | 28564 - | AGG | 311  |
| CCAGAAGCTAACCCATAAAAT | 28568 + | AGG | 2    |
| AATAGGTGATGTTGTTAGAG  | 28585 + | TGG | 52   |
| AGGTGATGTTGTTAGAGTGG  | 28588 + | TGG | 19   |
| CACTAAGTCGTTATATCCTA  | 28601 - | TGG | 94   |
| AGAGTGGTGGATTCTGCCAT  | 28601 + | AGG | 3    |
| ACTAAGCAAGATGTAGTATT  | 28685 + | AGG | 681  |
| TAGTATTAGGAGACTTTACA  | 28698 + | AGG | 217  |
| TTTTAGTTCCTTAGATGGGT  | 28772 - | CGG | 3    |
| ATGCTTTTAGTTCTTTAGAT  | 28776 - | GGG | 115  |
| AATGCTTTTAGTTCTTTAGA  | 28777 - | TGG | 14   |
| TTTATCTATAAATAATGAAT  | 28837 + | TGG | 1    |
| AAAACAGTTACAACCTGCTAA | 28907 + | TGG | 260  |
| ATCAAATCAATTGGAACGAT  | 28973 + | TGG | 172  |
| ATTGGCGACTCTGTAGCTAG  | 28991 + | AGG | 2    |
| TTGGCGACTCTGTAGCTAGA  | 28992 + | GGG | 4    |
| ACTAATTTACAGAAATGTT   | 29027 + | AGG | 143  |
| AAAACGACTAATCTTGCAAG  | 29066 + | AGG | 160  |
| ACGACTAATCTTGCAAGAGG  | 29069 + | TGG | 83   |
| TGCAAGAGGTGGCGCAACAA  | 29080 + | TGG | 159  |
| TCTACCGCTTCTTTACCTAT  | 29095 - | TGG | 255  |
| ACAATGGCAACAGTTCCAAT  | 29096 + | AGG | 20   |
| AGTTCCAATAGGTAAAGAAG  | 29107 + | CGG | 3    |
| AGACAAGCAGAGCAAATAAG  | 29147 + | AGG | 5    |
| CAGTGCCTTGTAATATGATT  | 29157 - | AGG | 150  |

|                      |         |     |     |
|----------------------|---------|-----|-----|
| GGAGACCTAATCATATTACA | 29168 + | AGG | 58  |
| TACAAGGCACTGATGATGAT | 29184 + | TGG | 304 |
| ACTGATGATGATTGGTTACA | 29192 + | CGG | 16  |
| ATGATTGGTTACACGGTTAT | 29199 + | TGG | 51  |
| TGATTGGTTACACGGTTATT | 29200 + | GGG | 100 |
| TGGTTACACGGTTATTGGGC | 29204 + | AGG | 26  |
| TCCGTTTTATCAGTGCCTAT | 29215 - | CGG | 739 |
| TATTGGGCAGGCGTACCGAT | 29216 + | AGG | 54  |
| ACCGATAGGCACTGATAAAA | 29230 + | CGG | 17  |
| AACTTCAATTGCAGAACAAA | 29258 - | AGG | 585 |
| ATCACTAGTATTTTTGAATC | 29296 - | TGG | 16  |
| GTATTGTTGTACCACTCATA | 29337 - | GGG | 155 |
| CGTATTGTTGTACCACTCAT | 29338 - | AGG | 92  |
| ACAAGACAATGCCCTATGAG | 29342 + | TGG | 65  |
| TGTTTTTGCCGTGTCTTTA  | 29361 - | CGG | 122 |
| AACAATACGCCGTAAAGACA | 29368 + | CGG | 512 |
| GACACGGACAAAAACAACT  | 29384 + | AGG | 3   |
| ACACGGACAAAAACAACTA  | 29385 + | GGG | 3   |
| CAAAGTAGGGTTAACACTTG | 29398 + | AGG | 10  |
| GTGTGATATGCGTCAAACAC | 29449 - | TGG | 359 |
| TTCCTAAAAGCTGGATTGTA | 29485 - | TGG | 109 |
| AGCCATACAATCCAGCTTTT | 29499 + | AGG | 18  |
| AGCTTTTAGGAAAGCGAGCA | 29512 + | TGG | 50  |
| TTTTAGGAAAGCGAGCATGG | 29515 + | AGG | 2   |
| AGGAAAGCGAGCATGGAGGA | 29519 + | CGG | 38  |
| CCTCGTGACCTTTTTCGTTA | 29532 - | GGG | 12  |
| ACCTCGTGACCTTTTTCGTT | 29533 - | AGG | 116 |
| GGCTTACACCCTAACGAAAA | 29540 + | AGG | 10  |
| CCCTAACGAAAAAGGTCACG | 29548 + | AGG | 10  |
| TATTATGTACGAGTTAATCA | 29572 + | AGG | 22  |
| ATTACAGTTTTTACGACTAA | 29598 + | AGG | 9   |
| ACAGTTTTTACGACTAAAGG | 29601 + | AGG | 9   |
| GTAATTAATCCGTAAGCCAT | 29611 - | TGG | 522 |
| CGACTAAAGGAGGCAACCAA | 29611 + | TGG | 81  |
| AGGAGGCAACCAATGGCTTA | 29618 + | CGG | 406 |
| ACAAGTTTACATTCAATGAC | 29648 + | AGG | 671 |
| GTTTACATTCAATGACAGGT | 29652 + | CGG | 76  |
| AACTATCGCTTGTAGATGA  | 29699 + | AGG | 21  |
| CGTATATTTCTTCTTTTTGA | 29736 - | TGG | 289 |
| GATTATTTAACGTATTTAAA | 29819 + | TGG | 13  |
| CTAGAATCATATTGCTAAAA | 29826 - | CGG | 11  |
| CGTTTTAGCAATATGATTCT | 29843 + | AGG | 275 |
| CATTGATACCGTCGCCGTTA | 29850 - | TGG | 121 |

|                       |         |     |      |
|-----------------------|---------|-----|------|
| AATATGATTCTAGGCCATAA  | 29852 + | CGG | 149  |
| ATTCTAGGCCATAACGGCGA  | 29858 + | CGG | 24   |
| GACGCGCGTATTGATAATAC  | 29897 + | AGG | 71   |
| CGTATTGATAATACAGGTTA  | 29903 + | TGG | 74   |
| ACTAGATGCTTTCACTAAAA  | 29968 + | AGG | 144  |
| CTTGCTCTTTTGGTTCGAAT  | 30024 - | CGG | 67   |
| AATCCGGTTCTTGCTCTTT   | 30034 - | TGG | 17   |
| CGAACCAAAAAGAGCAAGAAC | 30046 + | CGG | 20   |
| GATAAATCAGTGATAAATTC  | 30049 - | CGG | 6    |
| TGCATTACTGCATTTGTATA  | 30073 - | TGG | 60   |
| ATGCAGTAATGCAATCATTT  | 30099 + | TGG | 65   |
| TGCAGTAATGCAATCATTTT  | 30100 + | GGG | 708  |
| TATAAATAATTTTCGTTCTA  | 30111 - | GGG | 274  |
| ATATAAATAATTTTCGTTCT  | 30112 - | AGG | 27   |
| TATATGACGCAAGCTCGTCC  | 30146 + | AGG | 5246 |
| GATAACATGTAATGATTACC  | 30148 - | TGG | 360  |
| CTATCAATAAATTGTCCGTT  | 30181 - | GGG | 26   |
| TTATCTAGATTGAAGCCCAA  | 30182 + | CGG | 109  |
| TCTATCAATAAATTGTCCGT  | 30182 - | TGG | 67   |
| GATAGATTGCTTGTTAAAAA  | 30215 + | CGG | 7    |
| AGATTGCTTGTTAAAAACGG  | 30218 + | CGG | 11   |
| AATGCGTATAGATACATTGA  | 30254 + | TGG | 3    |
| GATACATTGATGGAGAATTA  | 30264 + | TGG | 20   |
| ATGGATTTATTCAGCTGTAT  | 30283 + | TGG | 178  |
| TTATTTCTCCAGTTCTATAT  | 30321 - | TGG | 554  |
| GTACGTTTCCAATATAGAAC  | 30329 + | TGG | 2    |
| AGAACTGGAGAAATAACTTA  | 30344 + | TGG | 480  |
| TATCTGTCGTTAAATATATT  | 30373 - | CGG | 695  |
| TACGTCAGCGATTTATAATC  | 30412 + | CGG | 214  |
| AAAATCATTAAATTTTCTAC  | 30415 - | CGG | 5    |
| TTCTTAAGTTGTCTTTCAGT  | 30454 - | GGG | 1622 |
| ATTCTTAAGTTGTCTTTCAG  | 30455 - | TGG | 100  |
| GAATTCGTTGAACTTTGTTG  | 30490 + | AGG | 44   |
| AGTGCTGACGATATTGATAA  | 30518 + | AGG | 5    |
| AGACAAAGTATTGTATCAAA  | 30544 + | TGG | 32   |
| GTATCTGAAGTGTATTCCAT  | 30556 - | AGG | 72   |
| GTATCAAAATGGATATACCTA | 30556 + | TGG | 12   |
| TCATAAGTGATACCTTGCAT  | 30583 - | AGG | 90   |
| TCAGATACACAACCTATGCA  | 30587 + | AGG | 343  |
| CAAGGTATCACTTATGATGC  | 30605 + | AGG | 84   |
| ATGATGCAGGTATCTTATAT  | 30618 + | TGG | 70   |
| GGTATCTTATATTGGTATAC  | 30626 + | AGG | 3    |
| ACCTTGTAAGTAGTTAGGGT  | 30647 - | TGG | 174  |

|                       |         |     |      |
|-----------------------|---------|-----|------|
| CGAAACCTTGTAAGTAGTTA  | 30651 - | GGG | 20   |
| TCGAAACCTTGTAAGTAGTT  | 30652 - | AGG | 24   |
| GCCAACCCTAACTACTTACA  | 30662 + | AGG | 192  |
| TTTAAACGACGTATCGATAT  | 30713 + | TGG | 2622 |
| AAACGACGTATCGATATTGG  | 30716 + | CGG | 46   |
| AGGAGACTTCCAAGAAGCTG  | 30757 + | AGG | 104  |
| GGAGACTTCCAAGAAGCTGA  | 30758 + | GGG | 16   |
| ATGTATTACGATCTAGAAAC  | 30788 + | AGG | 15   |
| GGACGCAAAGCGCTTTTAAT  | 30809 + | AGG | 157  |
| GACGCAAAGCGCTTTTAATA  | 30810 + | GGG | 396  |
| ACGCAAAGCGCTTTTAATAG  | 30811 + | GGG | 22   |
| CTTTAATAGGGGTA ACTAT  | 30821 + | TGG | 158  |
| ATAGGGGTA ACTATTGGACC | 30827 + | TGG | 44   |
| GAGTGATGTCTGTTGTTACC  | 30829 - | AGG | 1062 |
| GTTAACACCTCTTTGGCCGA  | 30860 - | TGG | 20   |
| CATCACTCAATTTATTCCAT  | 30860 + | CGG | 4    |
| AGAATTGGTTAACACCTCTT  | 30867 - | TGG | 416  |
| ATTTATTCCATCGGCCAAAG  | 30869 + | AGG | 5    |
| GTGCAATGTTTTTTAAGAAT  | 30882 - | TGG | 15   |
| GAATCAGTCATCGATACTTG  | 30904 - | AGG | 6    |
| CAAGTATCGATGACTGATTC  | 30923 + | AGG | 629  |
| GTATCGATGACTGATTCAGG  | 30926 + | CGG | 43   |
| GCTGGGTTCTGTATTGGTAA  | 30943 - | CGG | 4    |
| AGATATGCTGGGTTCTGTAT  | 30949 - | TGG | 135  |
| TAATATCACTTAGATATGCT  | 30960 - | GGG | 424  |
| GTAATATCACTTAGATATGC  | 30961 - | TGG | 49   |
| AGCATATCTAAGTGATATTA  | 30979 + | CGG | 22   |
| CTAAGTGATATTACGGAAGT  | 30986 + | TGG | 16   |
| CTCTAAACGCTTTCGGTAA   | 31038 - | GGG | 11   |
| TCTCTAAACGCTTTCGGTAA  | 31039 - | CGG | 2    |
| CCTGCATCTCTAAACGCTTT  | 31045 - | CGG | 311  |
| CCGAAAGCGTTTAGAGATGC  | 31061 + | AGG | 1399 |
| TGGTTCTTTGATGTA CTGCC | 31085 + | TGG | 417  |
| AGAGCACCATTATAGTG TCC | 31087 - | AGG | 210  |
| GTA CTGCCTGGACACTATAA | 31097 + | TGG | 9    |
| ATTTCTACCTGTGCTGTTTC  | 31124 - | TGG | 51   |
| GTA CTTACCAGAAACAGCAC | 31133 + | AGG | 28   |
| ATTTTCAATAAGAAAAACAA  | 31190 + | CGG | 2    |
| ATAAGAAAAACAACGGAGCA  | 31197 + | TGG | 30   |
| TCCAATAACCGGCGTTTTG   | 31213 - | CGG | 1    |
| AATTTCTGTCCGCAAACGC   | 31220 + | CGG | 19   |
| AGGGATATGTTCCAATAAC   | 31223 - | CGG | 31   |
| GTCCGCAAACGCCGTTAT    | 31227 + | TGG | 21   |

|                       |         |     |      |
|-----------------------|---------|-----|------|
| ATAATTTTGTAAATATTCTTA | 31242 - | GGG | 145  |
| GATAATTTTGTAAATATTCTT | 31243 - | AGG | 10   |
| TTATCAGATTTAAAAATCGT  | 31277 + | TGG | 187  |
| GCAATACCTTTAAAGTCTTT  | 31333 - | AGG | 301  |
| GATTTTCCTAAAGACTTTAA  | 31343 + | AGG | 396  |
| AAAGACTTTAAAGGTATTGC  | 31352 + | AGG | 86   |
| ACTTTAAAGGTATTGCAGGT  | 31356 + | TGG | 50   |
| AGAAGTAAAATCGAATACAC  | 31384 + | CGG | 47   |
| GAAGTAAAATCGAATACACC  | 31385 + | GGG | 850  |
| AATACTTGTGTTGTGTTACC  | 31387 - | CGG | 241  |
| CTAAAAATTGATGTGCAGAC  | 31425 - | GGG | 177  |
| ACTAAAAATTGATGTGCAGA  | 31426 - | CGG | 259  |
| CAATTTTTAGTTAGAACTT   | 31454 + | TGG | 9    |
| TTAGTTAGAACTTTGGTAC   | 31460 + | TGG | 144  |
| AACTTTGGTACTGGTGGCGT  | 31469 + | TGG | 33   |
| GTACTGGTGGCGTTGGTAAA  | 31476 + | TGG | 12   |
| TGGTAAATGGAGTTTATTCG  | 31489 + | AGG | 4    |
| GGTAAATGGAGTTTATTCGA  | 31490 + | GGG | 6    |
| GAGTTTATTCGAGGGAAAGG  | 31498 + | TGG | 207  |
| CTGATGTTTGTGTCAATAAT  | 31578 - | TGG | 130  |
| AGTTTCTATGAATCAGATAG  | 31615 + | AGG | 26   |
| TATGAATCAGATAGAGGAAC  | 31621 + | TGG | 13   |
| TGTTCAAGACTTATAGATAA  | 31662 - | CGG | 340  |
| TCTATCTACGTTATAATCAT  | 31711 - | CGG | 11   |
| GATGATTATAACGTAGATAG  | 31729 + | AGG | 414  |
| ACGATAGTAGACGCAATTAA  | 31774 + | TGG | 7    |
| CGATAGTAGACGCAATTAAT  | 31775 + | GGG | 1271 |
| GAATGTTTTAAAAATTCATT  | 31800 - | CGG | 1410 |
| AATGAATTTTTAAAACATTC  | 31819 + | AGG | 116  |
| ATTTTTAAAACATTCAGGCA  | 31824 + | AGG | 1410 |
| TTCAGGCAAGGTGCATGCTC  | 31836 + | AGG | 403  |
| CAGGCATTCTTTACACAAAA  | 31855 + | CGG | 3    |
| AGGCATTCTTTACACAAAAC  | 31856 + | GGG | 16   |
| ATTGAAAATGATTTAGTTAG  | 31918 + | TGG | 52   |
| TTGAAAATGATTTAGTTAGT  | 31919 + | GGG | 707  |
| GATTTAGTTAGTGGGTTTGA  | 31927 + | TGG | 26   |
| CAGCCATATTTTGCTTTAAT  | 32000 - | TGG | 785  |
| TAACCAATTAAGCAAAAATA  | 32013 + | TGG | 2    |
| GTGAATGATAGTGCGACAAA  | 32062 + | AGG | 140  |
| GAAGTTGAACAACAAATCAA  | 32221 + | TGG | 368  |
| TTGTTGAATTACCTTTAACA  | 32234 - | AGG | 754  |
| AATGGCGCTGACCTTGTTAA  | 32239 + | AGG | 20   |
| AAGGTAATCAACAACAAAT   | 32258 + | TGG | 126  |

|                       |         |     |      |
|-----------------------|---------|-----|------|
| TCTAAACTTACAGATGATTA  | 32287 + | CGG | 387  |
| TGCGCTTAAAACGCTATCTA  | 32320 - | TGG | 35   |
| TAAGCGCAGTTAACACATCT  | 32351 + | AGG | 381  |
| GTGCCTATATCCGTCTTTTC  | 32388 - | TGG | 35   |
| AACAGATGCGCCAGAAAAGA  | 32394 + | CGG | 15   |
| GCGCCAGAAAAGACGGATAT  | 32401 + | AGG | 8    |
| ATAGGCACGTTAGAGAAGCC  | 32419 + | TGG | 7    |
| TCATCAACACCATCTTGTC   | 32421 - | AGG | 1094 |
| TTAGAGAAGCCTGGACAAGA  | 32428 + | TGG | 11   |
| GGACAAGATGGTGTGATGA   | 32440 + | CGG | 9    |
| ACTTATACATCAAGCAAATC  | 32482 + | TGG | 635  |
| ATAATACTGCTCGTGCAACA  | 32531 + | TGG | 2040 |
| ACTCATCGTTTGAATCGTCT  | 32540 - | GGG | 4389 |
| TACTCATCGTTTGAATCGTC  | 32541 - | TGG | 872  |
| TACACAAAATACAAAATCTA  | 32578 + | CGG | 1619 |
| AATACAAAATCTACGGCACA  | 32585 + | TGG | 3043 |
| CATCATTCTTTTTATAAAAC  | 32594 - | GGG | 514  |
| CCGTTTTATAAAAAGAATGA  | 32611 + | TGG | 1    |
| CAGTATGTAGATGATAAATT  | 32692 + | CGG | 3    |
| ATAAATTCGGAACAACGAGC  | 32705 + | TGG | 602  |
| GCAACAACATAAGATGACAG  | 32727 + | AGG | 33   |
| CATAAGATGACAGAGGCGAA  | 32734 + | TGG | 58   |
| GTTAACTTAAATAATGCGCA  | 32770 + | AGG | 23   |
| AATAATGCGCAAGGCGATTT  | 32779 + | GGG | 9    |
| TTACTATGCAACAAGAGTGC  | 32820 + | CGG | 12   |
| TCAACGCTACCTGGTAAATC  | 32823 - | CGG | 29   |
| ACAAGAGTGCCGATTTACC   | 32830 + | AGG | 642  |
| TCATAACTTTCAACGCTACC  | 32832 - | TGG | 1109 |
| AGGTAGCGTTGAAAGTTATG  | 32850 + | AGG | 3    |
| GGTAGCGTTGAAAGTTATGA  | 32851 + | GGG | 5    |
| AAGTTATGAGGGTTATTTAT  | 32862 + | CGG | 66   |
| TAAATCTTTTTAGAGTTATA  | 32910 - | AGG | 436  |
| TACACACGATCAATCACAAA  | 32947 + | CGG | 3122 |
| ACGGCAGACTTGAGCAACAG  | 32966 + | TGG | 7    |
| ACCGTTGATTTATGTTTCATT | 32979 - | AGG | 129  |
| TCCTAATGAACATAAATCAA  | 32994 + | CGG | 69   |
| TCAACGGTATTGTTTCGACGG | 33010 + | TGG | 15   |
| TTGTTTCGACGGTGCGCAAA  | 33019 + | TGG | 4    |
| GACGGTGGCGCAAATGGTGT  | 33025 + | AGG | 38   |
| AAAATAGAATAGTTTGTGTA  | 33054 - | CGG | 292  |
| TATTCTATTTTGTTGGTAAG  | 33082 + | TGG | 3    |
| TTGGTAAGTGGAACCTTATCC | 33094 + | AGG | 563  |
| AATCCCTCAATAACGCCACC  | 33096 - | TGG | 368  |

|                       |         |     |      |
|-----------------------|---------|-----|------|
| GTAAGTGGAACCTATCCAGG  | 33097 + | TGG | 33   |
| TTATCCAGGTGGCGTTATTG  | 33108 + | AGG | 2    |
| TATCCAGGTGGCGTTATTGA  | 33109 + | GGG | 7    |
| GGTGGCGTTATTGAGGGATT  | 33115 + | CGG | 1    |
| TTGAATCGCGTTAGGTAATG  | 33127 - | CGG | 9    |
| TTACTCAATTGAATCGCGTT  | 33135 - | AGG | 473  |
| GCGAATGTAGTTGACTCAGA  | 33175 + | CGG | 181  |
| GTAGTTGACTCAGACGGCAA  | 33181 + | CGG | 38   |
| GTTGACTCAGACGGCAACGG  | 33184 + | TGG | 110  |
| TAAAGTAGTGCTACTTGTTT  | 33214 - | TGG | 63   |
| TTAGGTAAAACATCAGGTTT  | 33280 + | TGG | 67   |
| TTTAGTTATAGTAACTTTGT  | 33295 - | TGG | 955  |
| AGTTACTATAACTAAAATTA  | 33318 + | TGG | 9    |
| GTTACTATAACTAAAATTAT  | 33319 + | GGG | 15   |
| TTACTATAACTAAAATTATG  | 33320 + | GGG | 560  |
| AACGATAAAAACGAAGTTAT  | 33366 + | CGG | 74   |
| ATCGGATTCGTTAATACTGG  | 33384 + | CGG | 46   |
| AACTCTTCTTTAAATTTAAT  | 33428 - | AGG | 705  |
| TTAGTGAAAACAACTTTCT   | 33455 - | AGG | 592  |
| AGAAAGTTTGTTTTCACTAA  | 33474 + | CGG | 262  |
| CTTTGTTGGTTTGATGCATT  | 33521 - | CGG | 1407 |
| TTAAATCTGACGCACTTTGT  | 33535 - | TGG | 108  |
| TGCGTCAGATTTAAGTGATG  | 33560 + | AGG | 8    |
| TGATGAGGAACTTCGCGGAA  | 33575 + | TGG | 66   |
| TGTTTTGTTAGTTTTTCAGTT | 33669 - | CGG | 31   |
| AACTAACAAAACAAATACTG  | 33695 + | AGG | 158  |
| ACTAACAAAACAAATACTGA  | 33696 + | GGG | 1289 |
| CTAACAAAACAAATACTGAG  | 33697 + | GGG | 456  |
| TAACAAAACAAATACTGAGG  | 33698 + | GGG | 67   |
| GTTTTAATGTCTTTAAAAGT  | 33731 - | TGG | 317  |
| ACATTA AAACTTTTTATGTG | 33760 + | TGG | 12   |
| CATTA AAACTTTTTATGTGT | 33761 + | GGG | 133  |
| ATAAAAATGAGCAAATTAAG  | 33790 + | TGG | 25   |
| AATTAAGTGGTACGTAGACA  | 33803 + | TGG | 13   |
| ATTAAGTGGTACGTAGACAT  | 33804 + | GGG | 509  |
| GAAGAATATGCATTGATCAC  | 33840 + | TGG | 6    |
| GACTTTTCATCTTTGCCTC   | 33857 - | TGG | 53   |
| CACTGGTGAAAAATATCCAG  | 33857 + | AGG | 6    |
| GGCAAAAGATGAAAAGTCAC  | 33878 + | AGG | 993  |
| AGTCACAGGTGTAATGCTTG  | 33892 + | AGG | 133  |
| TTTTTAATTTAACACAAAGT  | 33916 + | AGG | 104  |
| AAAGTAGGTGGCGTAATGTT  | 33931 + | TGG | 2    |
| CCATTCATGTTTCGTGCCGTT | 33943 - | TGG | 633  |

|                        |         |     |      |
|------------------------|---------|-----|------|
| TAATGTTTGGATTTACCAAA   | 33944 + | CGG | 160  |
| CCAAACGGCACGAACATGAA   | 33959 + | TGG | 12   |
| ACTCTCAATGAGATTA AATT  | 34024 + | AGG | 340  |
| CGTCTATCTGTCTTTCCCTC   | 34085 - | TGG | 1275 |
| ATATACGCGATATGAAAATG   | 34151 + | TGG | 12   |
| GATATGAAAATGTGGATTCT   | 34159 + | CGG | 129  |
| ATGTGGATTCTCGGTTTGAT   | 34168 + | AGG | 15   |
| TGTGGATTCTCGGTTTGATA   | 34169 + | GGG | 153  |
| GCTTTACTAAGA AACTATTTT | 34216 + | TGG | 39   |
| GA AACTATTTTTGGTATTTAA | 34226 + | AGG | 3    |
| CTATTTTTGGTATTTAAAGG   | 34229 + | AGG | 1    |
| TCCTAAAATCCCTTTAAGCA   | 34242 - | TGG | 2583 |
| GAGGTGATTACCATGCTTAA   | 34248 + | AGG | 1    |
| AGGTGATTACCATGCTTAAA   | 34249 + | GGG | 8    |
| ACCATGCTTAAAGGGATTTT   | 34257 + | AGG | 10   |
| GGATTTTAGGATATAGCTTC   | 34270 + | TGG | 22   |
| GATTTTAGGATATAGCTTCT   | 34271 + | GGG | 117  |
| ATAGCTTCTGGGCGTGCTTC   | 34282 + | TGG | 18   |
| TTCTGGGCGTGCTTCTGGTT   | 34287 + | TGG | 50   |
| ACAGTTAAGAGTCAGTGCTT   | 34322 + | CGG | 196  |
| AAGAGTCAGTGCTTCGGCAC   | 34328 + | TGG | 41   |
| TTTTTATTTTGATTGAAATG   | 34352 + | AGG | 1    |
| ATTGAAATGAGGTGCATACA   | 34363 + | TGG | 19   |
| TTGAAATGAGGTGCATACAT   | 34364 + | GGG | 96   |
| CTGTAGGCTTTCTAGTCTTT   | 34380 - | GGG | 30   |
| GCTGTAGGCTTTCTAGTCTT   | 34381 - | TGG | 28   |
| AAAGCCTACAGCTAGTGAAG   | 34408 + | TGG | 9    |
| GCCTACAGCTAGTGAAGTGG   | 34411 + | TGG | 11   |
| CAGCTAGTGAAGTGGTGGAG   | 34416 + | TGG | 2    |
| AGCTAGTGAAGTGGTGGAGT   | 34417 + | GGG | 27   |
| GAGTGGGCAAAGTCGAATAT   | 34433 + | TGG | 26   |
| CAAAGTCGAATATTGGTAAG   | 34440 + | AGG | 87   |
| GATTAATATAGATAATTATC   | 34462 + | GGG | 1    |
| ATTAATATAGATAATTATCG   | 34463 + | GGG | 1229 |
| ATTATCGGGGCAGTCAATGT   | 34476 + | TGG | 33   |
| TTATCGGGGCAGTCAATGTT   | 34477 + | GGG | 18   |
| ACTTTATTTTTAAAAGATAT   | 34509 + | TGG | 9    |
| GATATTGGGGTTTTGTAACA   | 34524 + | TGG | 5    |
| ATATTGGGGTTTTGTAACAT   | 34525 + | GGG | 4    |
| TATTGGGGTTTTGTAACATG   | 34526 + | GGG | 31   |
| TGTAACATGGGGCAATGCTA   | 34537 + | AGG | 25   |
| ATGGGGCAATGCTAAGGATA   | 34543 + | TGG | 34   |
| CGATAGAATCGGAAACCCTT   | 34564 - | AGG | 3380 |



|                      |         |     |      |
|----------------------|---------|-----|------|
| GGCTAATTACAGATATCCTA | 34564 + | AGG | 312  |
| GCTAATTACAGATATCCTAA | 34565 + | GGG | 338  |
| CAGATGAATAACGATAGAAT | 34575 - | CGG | 668  |
| CGATTCTATCGTTATTCATC | 34592 + | TGG | 151  |
| TTATTCATCTGGATTTGTAC | 34603 + | CGG | 14   |
| ACTGCGATGTCTCCAGGTTT | 34606 - | CGG | 23   |
| TCTGGATTTGTACCGGAACC | 34610 + | TGG | 24   |
| AACCTGGAGACATCGCAGTT | 34626 + | TGG | 15   |
| GACATCGCAGTTTGGCACCC | 34634 + | TGG | 114  |
| CCGAACCTATTCCGTTGCCA | 34635 - | GGG | 209  |
| TCCGAACCTATTCCGTTGCC | 34636 - | AGG | 77   |
| GCAGTTTGGCACCTGGCAA  | 34640 + | CGG | 27   |
| TGGCACCTGGCAACGGAAT  | 34646 + | AGG | 7    |
| CCCTGGCAACGGAATAGGTT | 34651 + | CGG | 128  |
| GGCAACGGAATAGGTTGGA  | 34655 + | CGG | 2    |
| AGATGGTCTACTACTATTG  | 34667 - | CGG | 798  |
| GGACACACCGCAATAGTAGT | 34676 + | AGG | 96   |
| TAAAAATAACTTTTATTAGA | 34684 - | TGG | 5    |
| TATTAGAATTAACCCAGTTT | 34716 - | TGG | 291  |
| TTTATAGCGTTGACCAAAAC | 34719 + | TGG | 179  |
| TTATAGCGTTGACCAAAACT | 34720 + | GGG | 353  |
| ACTGGGTTAATTCTAATAGT | 34737 + | TGG | 41   |
| TAATAGTTGGACAGGTTCTC | 34750 + | CGG | 7    |
| AATAGTTGGACAGGTTCTCC | 34751 + | GGG | 360  |
| GGGTGTCTTACTAAACTTCC | 34753 - | CGG | 316  |
| AGCCTGTAACACTTACATAA | 34773 - | GGG | 158  |
| AAGCCTGTAACACTTACATA | 34774 - | AGG | 62   |
| CTAGTATCTTTTGAATATGG | 34804 - | AGG | 12   |
| TTGCTAGTATCTTTTGAATA | 34807 - | TGG | 74   |
| GAACCTGTATCAGTACTACT | 34831 - | AGG | 1400 |
| GCCAGTAATTGTTGAGTCAT | 34865 - | TGG | 492  |
| GCCAATGACTCAACAATTAC | 34880 + | TGG | 583  |
| GTTTTAACTTCTTTAAATTG | 34900 - | CGG | 1    |
| CATTGATCATATAGTTGTAA | 34987 + | TGG | 439  |
| ATTGATCATATAGTTGTAAT | 34988 + | GGG | 862  |
| GATGAACGCTCAGATATTCA | 35012 + | AGG | 672  |
| TCTCTATCGACATATAAATG | 35104 - | CGG | 23   |
| GCATTTATATGTCGATAGAG | 35122 + | AGG | 18   |
| ATGTCGATAGAGAGGCTACA | 35130 + | TGG | 18   |
| GTGACGCGGGTCATCAAAT  | 35150 - | TGG | 26   |
| CTAGCCAATTAGGGTGACGC | 35163 - | GGG | 28   |
| ACTAGCCAATTAGGGTGACG | 35164 - | CGG | 65   |
| CTTCAATAACTAGCCAATTA | 35172 - | GGG | 6    |

|                      |         |     |      |
|----------------------|---------|-----|------|
| ACTTCAATAACTAGCCAATT | 35173 - | AGG | 5    |
| ATGACCCGCGTCACCCTAAT | 35175 + | TGG | 130  |
| TGGCTAGTTATTGAAGTATG | 35195 + | TGG | 3    |
| CAAATACAAGCGTTAATACG | 35255 + | TGG | 3161 |
| AAGCGTTAATACGTGGTGTT | 35262 + | TGG | 103  |
| CGTGGTGTTTGGTTATTGTC | 35273 + | AGG | 21   |
| GTGGTGTTTGGTTATTGTCA | 35274 + | GGG | 21   |
| CTTATCTGAAACGACGTTAA | 35308 + | AGG | 473  |
| TCATACTACGCCAAATATTA | 35319 - | GGG | 152  |
| TTCATACTACGCCAAATATT | 35320 - | AGG | 1459 |
| TAAAGGTAGACCTAATATT  | 35325 + | TGG | 94   |
| AATTACGACTTGATTAAGCA | 35369 + | AGG | 399  |
| CTTGATTAAGCAAGGTATAC | 35377 + | CGG | 512  |
| TGCTCATACTTTCGCTTATC | 35380 - | CGG | 696  |
| TGATGGAGTAGGGCCTCGTG | 35525 - | TGG | 24   |
| GTTGACAGTGCGTCCACACG | 35528 + | AGG | 15   |
| GTTTTTCGTCTGATGGAGTA | 35535 - | GGG | 118  |
| GGTTTTTCGTCTGATGGAGT | 35536 - | AGG | 26   |
| ATGCTTGGTTTTTCGTCTGA | 35542 - | TGG | 610  |
| CTTGTTTCAGTAACGATGCT | 35557 - | TGG | 103  |
| AGTGCTTGCTGGAATGTGAA | 35581 - | TGG | 1    |
| TTTGTCTATCCAGTGCTTGC | 35592 - | TGG | 1257 |
| ATTCACATTCCAGCAAGCAC | 35599 + | TGG | 738  |
| CACTGGATAGACAAATGTCT | 35616 + | AGG | 104  |
| ACTGGATAGACAAATGTCTA | 35617 + | GGG | 53   |
| CTGGATAGACAAATGTCTAG | 35618 + | GGG | 971  |
| CCCATGTATGAGATTTTTTC | 35628 - | GGG | 23   |
| CCCATGTATGAGATTTTTTT | 35629 - | CGG | 1    |
| ACCCGAAAAAATCTCATACA | 35643 + | TGG | 1    |
| CCCGAAAAAATCTCATACAT | 35644 + | GGG | 8    |
| CCGAAAAAATCTCATACATG | 35645 + | GGG | 346  |
| AAAAATCTCATACATGGGGC | 35649 + | TGG | 5    |
| AAAATCTCATACATGGGGCT | 35650 + | GGG | 36   |
| AACACGAGCACAAACGAGCT | 35680 + | CGG | 171  |
| CAATGAATGTTAAGCGAATA | 35703 + | TGG | 28   |
| AATGAATGTTAAGCGAATAT | 35704 + | GGG | 225  |
| TGCTATCAAATGCTTAATTT | 35741 + | AGG | 411  |
| CTTAATTTAGGCAAGTATCA | 35753 + | AGG | 6    |
| GCGCTTAACAAAATACTTAA | 35789 + | AGG | 43   |
| AACAAAATACTTAAAGGAAA | 35795 + | AGG | 37   |
| AAAGGAAAAGGAACGCTCGA | 35807 + | CGG | 7    |
| AAAGGAACGCTCGACGGACA | 35813 + | AGG | 51   |
| CGGACAAGGCAAAGCATTCG | 35827 + | CGG | 2123 |

|                      |         |     |      |
|----------------------|---------|-----|------|
| GCGCACGCTTTCTTAGAAAG | 35891 + | TGG | 5    |
| AACTTCGCTAATGGTAGATA | 35924 + | CGG | 33   |
| TACGGTGCATATAATTA    | 35942 + | CGG | 835  |
| GCATATAATTA          | 35948 + | TGG | 1905 |
| CAAACGTCATTGCATAATCA | 35970 - | GGG | 1093 |
| GCAAACGTCATTGCATAATC | 35971 - | AGG | 65   |
| ATGACGTTTGCTAAAAATAA | 35999 + | AGG | 59   |
| CGTTTGCTAAAAATAAAGGT | 36003 + | TGG | 26   |
| CCGCCCATGATTGCTTTTGC | 36016 - | TGG | 459  |
| ATCTCCAGCAAAAGCAATCA | 36028 + | TGG | 2    |
| CCAGCAAAAGCAATCATGGG | 36032 + | CGG | 229  |
| CGGTGCTAGCTTCGTAAGAA | 36052 + | AGG | 5    |
| AGAAAGGATTACATCAATAA | 36068 + | AGG | 93   |
| TCTTAGGATTCCATCTAATT | 36090 - | CGG | 82   |
| ACACATTGTACCGAATTAGA | 36096 + | TGG | 401  |
| CGATTGTA             | 36132 - | TGG | 2220 |
| GCTAAGTTATATAAACAAAT | 36170 + | CGG | 5    |
| TATAAACAAATCGGCTTAAA | 36179 + | AGG | 61   |
| TAAAAGGTATCTACTTCACA | 36195 + | AGG | 1077 |
| AAAAGGTATCTACTTCACAA | 36196 + | GGG | 42   |
| AGGGATAAATATAAATAAAG | 36215 + | AGG | 159  |
| GAAACGAGAATAAAAAATGA | 36266 + | TGG | 116  |
| AAAAATGATGGTGTTGACTT | 36278 + | AGG | 246  |
| GGTGTTGACTTAGGTGACAT | 36287 + | TGG | 250  |
| AATACAGCATCTATAAGAAT | 36335 + | AGG | 5    |
| ATAGGTATCAATGACAAACA | 36353 + | AGG | 22   |
| CGTATCGATCTAAAAGCACA | 36377 + | TGG | 158  |
| TCCATAAACAAATGTAATCT | 36391 - | AGG | 93   |
| ACCTAGATTACATTTGTTTA | 36406 + | TGG | 176  |
| ACAACATCGTCGATAATAAG | 36439 - | GGG | 363  |
| TTACAACATCGTCGATAATA | 36441 - | AGG | 52   |
| ATTATCGACGATGTTGTA   | 36461 + | AGG | 6    |
| AACCTTTTTAGGTATCTTGT | 36476 - | AGG | 15   |
| GCGTGTTTGATAACCTTTTT | 36487 - | AGG | 80   |
| TACCTACAAGATACCTAAAA | 36490 + | AGG | 5    |
| AAAAAGGTTATCAAACACGC | 36506 + | TGG | 365  |
| TCTTTCAATATCGTTGATAG | 36590 + | TGG | 1562 |
| AAAAGAAATCGATGTTAAAT | 36631 + | TGG | 998  |
| AGTAGATTTAAAGGTGCGAA | 36764 + | AGG | 67   |
| AAAGGTGCGAAAGGTGATAA | 36773 + | AGG | 16   |
| GAAAGGTGATAAAGGCGAAC | 36781 + | CGG | 19   |
| AAAGGTGATAAAGGCGAACC | 36782 + | GGG | 45   |
| CCTTTTGCACCAGTTGTCC  | 36784 - | CGG | 492  |

|                       |         |     |      |
|-----------------------|---------|-----|------|
| AAAGGCGAACCGGGACAACC  | 36791 + | TGG | 117  |
| CCTGCTTCACCTTTTGCACC  | 36793 - | AGG | 650  |
| CCGGGACAACCTGGTGCAAA  | 36800 + | AGG | 17   |
| CCTGGTGCAAAAGGTGAAGC  | 36809 + | AGG | 28   |
| AAAGGTGAAGCAGGTAAAAA  | 36818 + | AGG | 2    |
| GCAGGTAAAAAAGGAGAACA  | 36827 + | AGG | 21   |
| AAAGGAGAACAAGGCGCACC  | 36836 + | CGG | 1107 |
| ACTACAGTACCGTTTTTACC  | 36838 - | GGG | 1494 |
| TACTACAGTACCGTTTTTAC  | 36839 - | CGG | 4    |
| CAAGGCGCACCCGGTAAAAA  | 36845 + | CGG | 10   |
| ATTTGCCACATTTTAGTGTC  | 36871 - | AGG | 34   |
| TCAATCCTGACACTAAAATG  | 36882 + | TGG | 21   |
| ACTAAAATGTGGCAAATTGA  | 36893 + | TGG | 939  |
| TTGATTTTGTCCAATAACTC  | 36925 - | AGG | 1013 |
| CAAAGCAGAACCTGAGTTAT  | 36931 + | TGG | 147  |
| ATCAATATCGCAAATGTTGA  | 36959 + | AGG | 17   |
| TCAATATCGCAAATGTTGAA  | 36960 + | GGG | 40   |
| CAACGACTCTAAAACGTATA  | 37030 + | CGG | 466  |
| CTTAATGTGTTCCATAGATTC | 37069 - | AGG | 1355 |
| GAAAGTGTATTGCAACAGAT  | 37145 + | TGG | 380  |
| AGTTAGTACAGAAGATTTTG  | 37174 + | AGG | 144  |
| TCGTCATGATTATGATTTTT  | 37213 - | TGG | 288  |
| AGCTTTTACTAAACAACAAG  | 37273 + | CGG | 1137 |
| CCTGTCCAAATTTTAACCGT  | 37312 - | CGG | 1725 |
| AAAAAGCGCATCTCAACCGA  | 37312 + | CGG | 195  |
| CTCAACCGACGGTTAAAATT  | 37323 + | TGG | 13   |
| CCGACGGTAAAATTTGGAC   | 37328 + | AGG | 7    |
| TAATTAAGTAAAGTGATTA   | 37371 - | GGG | 401  |
| TTAATTAAGTAAAGTGATT   | 37372 - | AGG | 152  |
| TAATACACTTTACTTAATTA  | 37390 + | AGG | 109  |
| AATACACTTTACTTAATTA   | 37391 + | GGG | 190  |
| ATACACTTTACTTAATTAAG  | 37392 + | GGG | 19   |
| TAATTAAGGGGTGATTTTTA  | 37404 + | TGG | 718  |
| GTAAGAACTTATTTACGA    | 37444 + | AGG | 167  |
| GAATATACAAAAGTATATGC  | 37471 + | TGG | 54   |
| ATGAAGGCTTTTTCCATACT  | 37484 - | TGG | 433  |
| GGTTTTATTACAAAAGATGA  | 37500 - | AGG | 35   |
| GGATATTTATTTTAGGTAA   | 37521 - | GGG | 2    |
| CGGATATTTATTTTAGGTA   | 37522 - | AGG | 14   |
| CTATCCGGATATTTATTTTT  | 37527 - | AGG | 1864 |
| CTTACCTAAAAATAAATATC  | 37539 + | CGG | 1    |
| GTTGATTCTTCTATGCTATC  | 37542 - | CGG | 1258 |
| TAGAAGAATCAACAGCAAAA  | 37568 + | TGG | 705  |

|                       |         |     |      |
|-----------------------|---------|-----|------|
| ACAGCAAAATGGACAATAAA  | 37579 + | TGG | 85   |
| GTCACCTGATAACTTTTATT  | 37593 - | AGG | 1669 |
| TGAACCTAATAAAAAGTTATC | 37605 + | AGG | 1709 |
| ACAATAGAAAATGTACGTAG  | 37630 + | CGG | 885  |
| ATGTACGTAGCGGTATAATG  | 37640 + | AGG | 35   |
| AGGGTTTCGCAAATAATTT   | 37660 + | AGG | 2880 |
| AATTTAGGTTCAAGTGATTT  | 37675 + | AGG | 82   |
| TCAAGTGATTTAGGAATATC  | 37684 + | AGG | 249  |
| GGAATATCAGGAGTCAATAG  | 37696 + | CGG | 66   |
| GTGACATACAACATCCCTGA  | 37734 - | AGG | 1202 |
| ATCAACTTTAGTAATCCTTC  | 37735 + | AGG | 34   |
| TCAACTTTAGTAATCCTTCA  | 37736 + | GGG | 56   |
| AATTATTCAATGGTCAATGT  | 37782 - | CGG | 1653 |
| AGTCGTTTAAAATTATTCAA  | 37792 - | TGG | 91   |
| TTTTAGTCGTTTTTTTTATTT | 37834 + | TGG | 8    |
| GGAAAAAAGGAGCAAACAAA  | 37855 + | TGG | 3566 |
| AATCAATTCTTAGCGAATAA  | 37925 + | AGG | 3    |
| CTTCTTCATCTACTGGTAT   | 37939 - | CGG | 327  |
| GAAACACTTTCTTCATCTAC  | 37945 - | TGG | 953  |
| CATTTCCCTTCTTGAGATGT  | 38017 - | TGG | 183  |
| GATAATCCAACATCTCAAGA  | 38027 + | AGG | 465  |
| ATAATCCAACATCTCAAGAA  | 38028 + | GGG | 521  |
| CAACATCTCAAGAAGGGAAA  | 38034 + | TGG | 15   |
| AACATCTCAAGAAGGGAAAT  | 38035 + | GGG | 49   |
| AGTAAATATAGAAAAGCAAC  | 38090 + | AGG | 13   |
| GGTGTCATTACTTCTTTAAT  | 38104 - | AGG | 32   |
| TTTGTGTCGTTTCATATTCGT | 38125 - | AGG | 983  |
| ATGAACGACACAAATGATTT  | 38150 + | AGG | 52   |
| TGAACGACACAAATGATTTA  | 38151 + | GGG | 686  |
| CGACACAAATGATTTAGGGT  | 38155 + | AGG | 1884 |
| CACAAATGATTTAGGGTAGG  | 38158 + | TGG | 57   |
| CAAAAAATCAAGCAGAAAAA  | 38198 + | TGG | 349  |
| AAATGGTTTGACAATTCATT  | 38215 + | AGG | 559  |
| AATGGTTTGACAATTCATTA  | 38216 + | GGG | 127  |
| GAAATCCATACCAACCATCT  | 38234 - | GGG | 749  |
| TGAAATCCATACCAACCATC  | 38235 - | TGG | 812  |
| GGGAAACAATTCAACCCAGA  | 38236 + | TGG | 14   |
| AACAATTCAACCCAGATGGT  | 38240 + | TGG | 166  |
| TTCAACCCAGATGGTTGGTA  | 38245 + | TGG | 4    |
| CGCTAACATAAAGAACATAT  | 38272 - | TGG | 1867 |
| ATGTTCTTTATGTTAGCGAC  | 38293 + | AGG | 14   |
| TTATGTTAGCGACAGGCGAA  | 38300 + | AGG | 219  |
| GCGACAGGCGAAAGGCTGCA  | 38308 + | AGG | 11   |

|                        |         |     |      |
|------------------------|---------|-----|------|
| TCTTTGCTTTATTATCAAAC   | 38333 - | GGG | 238  |
| ATCTTTGCTTTATTATCAAA   | 38334 - | CGG | 129  |
| AAAGCAAAGATTGAAAAATA   | 38362 + | TGG | 11   |
| ACGACAATATCCAACTTTTG   | 38400 - | CGG | 195  |
| CAGCTTTTTACCGCAAAGT    | 38406 + | TGG | 124  |
| CTCCGCCACCATACTTTGAC   | 38426 - | GGG | 71   |
| GCTCCGCCACCATACTTTGA   | 38427 - | CGG | 5    |
| GTCGTTTTCCCGTCAAAGTA   | 38434 + | TGG | 426  |
| GTTTTCCCGTCAAAGTATGG   | 38437 + | TGG | 471  |
| TTCCCGTCAAAGTATGGTGG   | 38440 + | CGG | 3    |
| TCAAAGTATGGTGCGGAGC    | 38446 + | TGG | 154  |
| TTAAATACTTTACATCATT    | 38497 + | TGG | 32   |
| TCACATCATTTGGTCAAAC    | 38507 + | TGG | 645  |
| TCATTTGGTCAAACACTGGAA  | 38512 + | CGG | 1608 |
| GGTCAAACACTGGAACGGTAA  | 38518 + | AGG | 167  |
| AAAACACTGGAACGGTAAAGGT | 38522 + | TGG | 10   |
| AACGGTAAAGGTTGGACTAA   | 38530 + | TGG | 151  |
| ACTAATGGCGTTGCGCAACC   | 38545 + | TGG | 285  |
| ACAGTTTCAGGACCCCAACC   | 38547 - | AGG | 69   |
| ATGGCGTTGCGCAACCTGGT   | 38549 + | TGG | 322  |
| TGGCGTTGCGCAACCTGGTT   | 38550 + | GGG | 52   |
| GGCGTTGCGCAACCTGGTTG   | 38551 + | GGG | 28   |
| ACATGTCTTGTCACAGTTTC   | 38559 - | AGG | 19   |
| TTAACCTAATAAAAATACAT   | 38598 - | TGG | 2688 |
| ACAATCCAATGTATTTTATT   | 38609 + | AGG | 375  |
| TGCCAACGCTTAAGTTGTTA   | 38624 - | GGG | 736  |
| TTGCCAACGCTTAAGTTGTT   | 38625 - | AGG | 290  |
| TTCCCTAACAACTTAAGCGT   | 38638 + | TGG | 1257 |
| AGCGTTGGCAATAAAGCTAA   | 38653 + | AGG | 115  |
| GCAAGCGACTACAAAAAAG    | 38685 + | AGG | 37   |
| GCTACAAGCATAATTTTTTT   | 38703 - | AGG | 95   |
| AAAAAAATTATGCTTGTAGC   | 38722 + | CGG | 691  |
| AGGATCGTTATAACCATGAC   | 38725 - | CGG | 31   |
| ATTATGCTTGTAGCCGGTCA   | 38728 + | TGG | 13   |
| GTTCCGTTTCCTACTGCTCC   | 38745 - | AGG | 896  |
| TATAACGATCCTGGAGCAGT   | 38752 + | AGG | 241  |
| GATCCTGGAGCAGTAGGAAA   | 38758 + | CGG | 4    |
| CTTAAATACTTAGCGATATT   | 38802 - | AGG | 517  |
| GCTAAGTATTTAAGACATGC   | 38827 + | AGG | 7419 |
| GGACATGAAGTTGCATTATA   | 38848 + | CGG | 122  |
| CATGAAGTTGCATTATACGG   | 38851 + | TGG | 272  |
| ATGTATCAAGATACTGCATA   | 38893 + | CGG | 556  |
| ACTGCATACGGTGTTAATGT   | 38905 + | AGG | 99   |

|                       |         |     |      |
|-----------------------|---------|-----|------|
| GTAGGCAATAAAAAAGATTA  | 38923 + | TGG | 6    |
| AAAAAGATTATGGCTTATAT  | 38933 + | TGG | 319  |
| AAAAGATTATGGCTTATATT  | 38934 + | GGG | 78   |
| CTTATATTGGGTAAATCAC   | 38946 + | AGG | 18   |
| TTATATTGGGTAAATCACA   | 38947 + | GGG | 813  |
| GAAATACATTTAGACGCAGC  | 38986 + | AGG | 239  |
| GCAGCAGGAGAAAGCGCAAG  | 39001 + | TGG | 6    |
| GCAGGAGAAAGCGCAAGTGG  | 39004 + | TGG | 41   |
| CAGGAGAAAGCGCAAGTGGT  | 39005 + | GGG | 248  |
| GATGTTATTAATAAATAACTT | 39082 + | AGG | 3    |
| AATAACTTAGGACAAATAAG  | 39094 + | AGG | 3    |
| ACATTTAGTAAATCATTACG  | 39108 - | AGG | 858  |
| AATTATCGTTTATCTGAATT  | 39172 + | AGG | 429  |
| TATTACTAATAAAAAATGATA | 39198 + | TGG | 670  |
| CTAATAAAAAATGATATGGAT | 39203 + | TGG | 1483 |
| TTGTATTCTAAATTAATAGC  | 39244 + | CGG | 376  |
| AGGCTTACCATGAATCGCAC  | 39247 - | CGG | 44   |
| TTAATAGCCGGTGCGATTCA  | 39256 + | TGG | 9    |
| CCAGCTACCAACCACCTAT   | 39267 - | AGG | 160  |
| GCGATTCATGGTAAGCCTAT  | 39268 + | AGG | 104  |
| ATTCATGGTAAGCCTATAGG  | 39271 + | TGG | 3    |
| TGGTAAGCCTATAGGTGGTT  | 39276 + | TGG | 208  |
| CCTATAGGTGGTTTGGTAGC  | 39283 + | TGG | 26   |
| GTATAACCTGCTGGCACTGG  | 39324 - | TGG | 6    |
| AGTGTATAACCTGCTGGCAC  | 39327 - | TGG | 2603 |
| TTATCGAGTGTATAACCTGC  | 39333 - | TGG | 1510 |
| AAAAATCCACCAGTGCCAGC  | 39334 + | AGG | 6206 |
| TGCCTTGTTCTTTTTTATAA  | 39365 - | GGG | 299  |
| TTGCCTTGTTCTTTTTTATA  | 39366 - | AGG | 26   |
| TACACAGTAGCTAATGTTAA  | 39406 + | AGG | 28   |
| AAAGGTAATAATGTAAGAGA  | 39424 + | CGG | 21   |
| TCAACTAATTCAAGAATTAC  | 39451 + | AGG | 23   |
| CAACTAATTCAAGAATTACA  | 39452 + | GGG | 768  |
| AACTAATTCAAGAATTACAG  | 39453 + | GGG | 193  |
| ATACGTAATTGTTGTGTTGT  | 39466 - | TGG | 60   |
| AACACAACAATTACGTATGA  | 39487 + | CGG | 362  |
| GACGGTGCATATTGTATTAA  | 39505 + | TGG | 37   |
| CAACGTCGTTATATAGCGAC  | 39562 + | AGG | 61   |
| TCGTTATATAGCGACAGGAG  | 39567 + | AGG | 174  |
| AGCGACAGGAGAGGTAGACA  | 39576 + | AGG | 204  |
| ACAGGAGAGGTAGACAAGGC  | 39580 + | AGG | 49   |
| GGTAATAGAATAAGTAGTTT  | 39601 + | TGG | 149  |
| AATTTTGCTACATTAATTAT  | 39660 + | AGG | 127  |

|                       |         |     |      |
|-----------------------|---------|-----|------|
| ATTTTGCTACATTAATTATA  | 39661 + | GGG | 57   |
| ACAGTTATTAATAACTATT   | 39690 + | TGG | 108  |
| TTATTAATAACTATTTGGA   | 39694 + | TGG | 20   |
| AGAAATGTTAAAAAGTGTAT  | 39712 - | AGG | 3115 |
| AAGATTTAAATGTAGATAAC  | 39754 + | AGG | 5218 |
| TTAAATGTAGATAACAGGC   | 39758 + | AGG | 1884 |
| TAGATAACAGGCAGGTA     | 39766 + | CGG | 2174 |
| TAGCTATAACATAAAAAAAT  | 39779 - | AGG | 2    |
| ATAACAAAAAAGTCCCGA    | 39803 - | AGG | 2228 |
| TTTATGTTATAGCTAGCCTT  | 39803 + | CGG | 6    |
| TTATGTTATAGCTAGCCTC   | 39804 + | GGG | 790  |
| GTGACATGCTTGGGTGAACA  | 39861 - | AGG | 3092 |
| AAACATCCAGTGACATGCTT  | 39870 - | GGG | 96   |
| AAAACATCCAGTGACATGCT  | 39871 - | TGG | 855  |
| TGTTCAACCAAGCATGTCAC  | 39880 + | TGG | 426  |
| CTAAAGTCATATATACTACG  | 39928 - | GGG | 3992 |
| GCTAAAGTCATATATACTAC  | 39929 - | GGG | 1062 |
| TGCTAAAGTCATATATACTA  | 39930 - | CGG | 2591 |
| TATAATTGCTTTTATATAGT  | 40003 + | AGG | 276  |
| GTAGGAGTGAAGTATATAGC  | 40021 + | CGG | 9    |
| TAGGAGTGAAGTATATAGCC  | 40022 + | GGG | 1088 |
| TCAGATACATGGCCTCTGCC  | 40024 - | CGG | 89   |
| TGAAGTATATAGCCGGGCAG  | 40028 + | AGG | 6    |
| GGGACCAACAGTCAGATACA  | 40035 - | TGG | 9    |
| GAGGCCATGTATCTGACTGT  | 40047 + | TGG | 78   |
| ACAAGGAAGATGTCTCCTGT  | 40055 - | GGG | 35   |
| TATCTGACTGTTGGTCCAC   | 40056 + | AGG | 24   |
| TAACCGTATCGATTAAGATA  | 40130 - | CGG | 3070 |
| TAACCGTATCTTAATCGATA  | 40143 + | CGG | 1792 |
| TGTGGTTTTGTTGGTTGTAG  | 40161 - | GGG | 24   |
| CTGTGGTTTTGTTGGTTGTA  | 40162 - | GGG | 9    |
| TCTGTGGTTTTGTTGGTTGT  | 40163 - | AGG | 5    |
| AATAGGATCTGTGGTTTTGT  | 40170 - | TGG | 8    |
| TCCTAAATTAATAGGATCTG  | 40179 - | TGG | 1    |
| AACCACAATCCTAAATTAAT  | 40187 - | AGG | 2734 |
| ACCACAGATCCTATTAATTT  | 40194 + | AGG | 337  |
| GGTTATTTTTTGCCTTTTTT  | 40222 + | TGG | 1    |
| GTTATTTTTTGCCTTTTTT   | 40223 + | GGG | 1    |
| CGTTTTTTTTGGGGCAAAAAA | 40234 + | AGG | 3    |
| GTTTTTTTTGGGGCAAAAAA  | 40235 + | GGG | 910  |
| AAGGGCAGATTATTTGAAAA  | 40253 + | AGG | 1    |
| TGAAAAAGGGCAAACGCTTG  | 40267 + | TGG | 197  |
| ACGCTTGTGGAAAAGCTAAA  | 40280 + | AGG | 156  |



|                      |         |     |      |
|----------------------|---------|-----|------|
| CCAAAACACTGTTGTATCA  | 40303 - | AGG | 380  |
| CGTGTACGTTAGAGAATGAC | 40347 + | CGG | 28   |
| ATCCTTGTATGATGGTAAAC | 40350 - | CGG | 1754 |
| GACCGGTTTACCATCATACA | 40364 + | AGG | 113  |
| GGTTTACCATCATACAAGGA | 40368 + | TGG | 94   |
| GTTTACCATCATACAAGGAT | 40369 + | GGG | 2212 |

## Normalized Reads Replicate 1

9.158956882  
1.991077583  
0.398215517  
179.595198  
131.809336  
427.2852493  
375.9154477  
1724.273187  
1469.415256  
287.9098185  
3079.798806  
476.6639734  
852.5794211  
705.2396799  
149.3308187  
450.7799648  
142.1629394  
1.19464655  
444.4085166  
3348.594279  
73.27165506  
242.9114651  
1069.606878  
6.371448266  
312.5991806  
672.5860076  
395.428008  
180.391629  
418.1262925  
1073.589033  
8327.881099  
1.592862067  
202.2934824  
1.19464655  
29.46794823  
4461.208433  
4677.041243  
584.9785939  
420.11737  
8479.999427  
140.5700774  
3056.702306

258.0436548  
5557.49575  
440.4263614  
2170.274566  
6.371448266  
5103.530061  
767.3613005  
11554.22321  
72.47522403  
9.158956882  
511.7069389  
11032.56089  
3888.176304  
362.3761201  
7007.000231  
126.2343188  
2573.666884  
2269.828445  
2613.886651  
13012.88665  
2660.079651  
4196.79333  
28.27330168  
935.4082486  
1151.241059  
3377.664012  
560.2892319  
0.398215517  
4873.361492  
1.592862067  
40.6179827  
1.592862067  
82.82882746  
2871.930306  
496.5747492  
12308.04519  
117.4735774  
1013.856705  
398.6137321  
742.273723  
29.06973271  
1270.307498  
565.0678181

1.592862067  
3244.261814  
234.1507238  
17.91969825  
5087.999656  
2066.340316  
1244.423489  
8.760741366  
20977.99342  
1641.44436  
584.9785939  
38.2286896  
7425.922954  
5942.96837  
46.59121545  
9.158956882  
4609.344605  
5.973232749  
1.991077583  
42.60906028  
338.8814046  
3.58393965  
138.5789998  
442.417439  
24.29114651  
864.5258866  
2275.403462  
1848.516428  
2492.430919  
16.32683618  
49.37872406  
43.40549131  
11.54824998  
2232.396186  
4581.469519  
5536.390328  
738.6897833  
2130.453014  
2647.336755  
2330.755419  
0.398215517  
478.655051  
625.5965766

9487.484684  
1612.374627  
1835.375316  
1.592862067  
82.43061194  
15522.44084  
1281.059317  
349.6332236  
2678.79578  
627.1894387  
512.9015854  
847.4026194  
4499.835338  
500.9551199  
13757.15145  
179.595198  
5485.816957  
1447.513403  
2411.194953  
2.3892931  
324.9438616  
456.7531976  
502.9461975  
5019.108372  
10.35360343  
361.5796891  
354.8100253  
4521.338976  
1977.538256  
457.1514131  
2987.811021  
2.3892931  
6163.579766  
1.19464655  
7.964310333  
350.4296546  
5.176801716  
1697.990963  
384.2779735  
27.47687065  
2972.678832  
46.59121545  
18.31791376

744.2648006  
5.176801716  
893.1974038  
214.2399479  
16.32683618  
21.90185341  
9407.045149  
388.2601287  
1794.359118  
1.19464655  
0.796431033  
9513.766908  
984.7869726  
1161.196446  
5118.662251  
15.13218963  
5.176801716  
3526.994831  
1076.376541  
2153.947729  
9.158956882  
140.5700774  
855.3669297  
122.6503791  
13.53932757  
2617.072375  
123.4468102  
1.991077583  
3641.6809  
3402.353374  
174.4183963  
56.54660336  
4659.121545  
1281.457533  
1.592862067  
283.5294478  
0.398215517  
661.8341886  
152.9147584  
1521.979705  
2533.447117  
62.51983611  
189.5505859

139.3754308  
53.75909474  
1209.380524  
2281.77491  
2474.113005  
17.52148273  
5932.216551  
49.77693958  
84.02347401  
432.0638355  
281.9365858  
2801.844375  
6.371448266  
221.0096117  
275.963353  
77.65202574  
82.82882746  
2471.325496  
11383.38876  
151.7201118  
662.2324042  
467.106801  
1.19464655  
18.31791376  
592.9429043  
104.7306809  
0.796431033  
14.3357586  
5.973232749  
2811.003332  
26.2822241  
616.0394042  
2220.847936  
4217.102321  
22.30006893  
1036.156774  
519.6712492  
31.0608103  
1.19464655  
490.203301  
5999.514974  
2130.453014  
518.8748182

88.00562917  
433.2584821  
2400.84135  
189.5505859  
38.2286896  
638.7376887  
267.6008272  
64.11269818  
346.4474995  
3.185724133  
525.2462664  
205.0809911  
559.4928009  
4647.97151  
412.9494907  
117.4735774  
1.19464655  
4.380370683  
1.991077583  
136.1897067  
109.1110516  
4142.636019  
0.398215517  
159.6844222  
545.1570423  
1433.57586  
5021.89588  
1316.500498  
134.5968446  
281.1401547  
395.0297925  
576.6160681  
226.584629  
348.8367926  
31.85724133  
57.74124991  
142.9593705  
2677.999349  
1065.624722  
1116.596309  
3.58393965  
1829.003868  
86.01455159



2305.667841  
52.16623268  
2.3892931  
56.14838784  
107.5181895  
28.27330168  
695.284292  
48.58229303  
35.44118098  
1.592862067  
7.566094816  
91.58956882  
1070.005093  
13.14111205  
82.43061194  
8.760741366  
734.3094127  
11.54824998  
2407.611014  
246.0971893  
691.3021369  
47.38764648  
351.2260857  
2787.110401  
355.6064563  
208.6649307  
71.28057748  
440.0281459  
6138.093973  
2680.388642  
200.3024049  
216.629241  
22.69828445  
615.2429732  
9.955387916  
1045.315731  
1.592862067  
1.19464655  
40.6179827  
0.398215517  
0.796431033  
126.2343188  
41.01619821

480.6461286  
1.19464655  
273.9722754  
105.5271119  
1.592862067  
347.642146  
215.4345945  
0.398215517  
696.4789386  
444.8067321  
295.4759133  
3.58393965  
59.33411198  
2570.082944  
24.68936203  
12.34468102  
3371.690779  
5.176801716  
12.74289653  
82.43061194  
3646.857701  
273.1758444  
13.53932757  
6319.680249  
144.5522325  
472.6818182  
19.1143448  
16.7250517  
12.74289653  
86.01455159  
1393.754308  
2445.441488  
101.9431723  
682.14318  
720.7700851  
2348.675117  
3161.432987  
10.75181895  
269.1936892  
216.2310255  
3791.409934  
22.30006893  
39.42333615

521.2641113  
2791.092556  
5.575017233  
11.9464655  
73.27165506  
1.19464655  
3350.187141  
360.3850425  
2367.789462  
286.715172  
1188.275102  
191.5416635  
547.5463354  
1056.465766  
547.5463354  
15.92862067  
129.0218274  
240.9203876  
930.6296624  
11.9464655  
8.760741366  
48.58229303  
1.592862067  
819.1293177  
5.176801716  
25.08757755  
254.4597151  
3117.231064  
569.0499733  
23.09649996  
2745.695987  
63.71448266  
1.592862067  
4.7785862  
1.19464655  
2.3892931  
1.592862067  
170.0380256  
139.7736463  
433.2584821  
13.53932757  
206.2756376  
122.2521636

565.4660336  
103.5360343  
60.92697404  
827.093628  
36.23761201  
64.11269818  
121.8539481  
116.6771464  
105.5271119  
60.13054301  
582.1910853  
8157.046643  
33.84831891  
2950.378763  
68.89128438  
162.4719308  
33.05188788  
570.2446198  
460.3371372  
83.22704298  
1005.494179  
0.398215517  
4686.996631  
74.86451713  
4017.596347  
658.250249  
1238.848472  
357.9957494  
86.41276711  
585.3768094  
163.2683618  
0.398215517  
108.3146205  
26.68043961  
162.8701463  
27.87508616  
5.973232749  
14.3357586  
23.09649996  
4.380370683  
2097.799342  
242.5132496  
54.55552578

1109.826645  
485.8229303  
113.4914222  
1020.626369  
1.19464655  
178.798767  
1078.765835  
129.0218274  
178.0023359  
813.156085  
2063.951023  
1967.184652  
354.0135943  
1634.27648  
1579.322739  
2115.71904  
706.036111  
3.185724133  
18.31791376  
8.362525849  
368.7475684  
966.0708433  
385.4726201  
206.2756376  
113.8896378  
1582.508463  
119.8628705  
1.991077583  
252.070422  
1272.696791  
11.9464655  
48.58229303  
286.3169565  
1124.560619  
14.73397412  
96.76637054  
89.59849124  
178.4005514  
4232.632726  
1.19464655  
373.9243701  
76.05916368  
392.6404994

109.1110516  
702.4521713  
207.8684997  
53.36087923  
51.36980164  
33.05188788  
148.5343877  
485.0264993  
82.43061194  
422.5066631  
43.80370683  
133.4021981  
1329.243395  
949.7440072  
5671.783603  
175.6130428  
0.398215517  
27.47687065  
577.4124991  
9.158956882  
714.3986368  
3.982155166  
115.4824998  
67.69663783  
530.0248526  
10.35360343  
216.629241  
832.2704298  
1.19464655  
448.3906717  
116.6771464  
422.9048787  
117.0753619  
5790.850043  
929.0368003  
38.2286896  
406.179827  
1353.932757  
2684.769013  
2254.696255  
58.93589646  
119.8628705  
25.48579306

0.796431033  
46.19299993  
6.769663783  
66.50199128  
1707.548135  
62.12162059  
504.140844  
289.1044651  
438.8334993  
569.4481888  
37.83047408  
7.566094816  
33.4501034  
103.1378188  
128.6236119  
628.7823008  
17.91969825  
1658.965842  
13.93754308  
295.8741289  
3.58393965  
147.7379567  
553.1213526  
143.7558015  
583.7839474  
1194.248334  
242.9114651  
43.40549131  
43.40549131  
789.263154  
500.1586889  
12.74289653  
546.7499043  
1883.161178  
940.9832658  
2.3892931  
10.35360343  
57.74124991  
0.398215517  
62.12162059  
71.28057748  
150.9236808  
64.51091369

849.393697  
323.749215  
1430.788351  
3489.164357  
87.60741366  
29.46794823  
64.51091369  
678.5592403  
11.54824998  
1416.452593  
212.2488704  
29.46794823  
5312.593207  
3867.867313  
16.32683618  
921.4707055  
627.1894387  
13.14111205  
7.167879299  
3839.873289  
7.964310333  
356.8011029  
2.787508616  
608.8715249  
156.498698  
0.398215517  
36.23761201  
64.51091369  
0.398215517  
211.8506548  
1596.844222  
5.973232749  
0.796431033  
7.964310333  
346.0492839  
2231.997971  
6.371448266  
25.88400858  
657.453818  
189.9488014  
40.6179827  
55.75017233  
330.1206633



441.6210079  
200.3024049  
111.8985602  
618.8269128  
31.85724133  
207.0720686  
51.36980164  
1694.407023  
400.2065942  
352.8189477  
102.7396033  
752.6273264  
473.8764648  
142.9593705  
219.4167497  
99.15566364  
52.96266371  
29.86616375  
3337.046029  
3.58393965  
64.51091369  
81.23596539  
17.12326721  
41.01619821  
103.1378188  
954.9208089  
54.95374129  
72.87343954  
1021.4228  
457.5496286  
6.371448266  
14.73397412  
5.973232749  
330.1206633  
46.98943096  
363.5707667  
141.7647239  
42.21084476  
1.592862067  
236.9382324  
9.955387916  
28.27330168  
174.8166118

29.06973271  
743.4683695  
8.760741366  
74.46630161  
8.362525849  
154.5076205  
115.4824998  
149.3308187  
2935.246573  
14.73397412  
75.66094816  
1020.228154  
1.592862067  
23.09649996  
70.48414644  
13.53932757  
152.9147584  
15.13218963  
356.8011029  
29.86616375  
164.0647929  
25.08757755  
46.59121545  
88.40384469  
390.2512063  
320.9617064  
5.176801716  
2386.903807  
71.67879299  
119.8628705  
4.380370683  
63.31626714  
23.09649996  
43.80370683  
3.58393965  
0.796431033  
2.787508616  
1348.755955  
17.52148273  
7.964310333  
1224.114498  
21.5036379  
0.398215517

32.65367236  
1320.482653  
294.2812668  
648.2948611  
64.51091369  
2849.630237  
1653.390825  
58.93589646  
548.7409819  
3.982155166  
483.8318527  
213.0453014  
2409.602091  
163.2683618  
69.68771541  
7498.796394  
5.973232749  
128.6236119  
3188.113426  
87.20919814  
54.15731026  
4.380370683  
21.10542238  
81.63418091  
15.92862067  
64.51091369  
57.34303439  
451.1781803  
82.82882746  
23.09649996  
13.93754308  
65.70556024  
516.0873095  
504.9372751  
9.158956882  
464.3192924  
485.4247148  
50.17515509  
248.4864824  
410.5601976  
133.4021981  
5.176801716  
670.9931455

11.54824998  
44.99835338  
385.0744046  
495.3801027  
29.86616375  
123.0485946  
57.74124991  
11.54824998  
1.991077583  
27.47687065  
0.796431033  
16.7250517  
249.2829134  
2.787508616  
687.3199817  
494.9818872  
87.60741366  
96.36815502  
20.30899135  
79.24488781  
6.371448266  
58.13946543  
302.6437926  
25.48579306  
122.6503791  
1533.527955  
39.82155166  
298.263422  
93.18243089  
1189.071533  
181.9844911  
68.89128438  
234.9471548  
122.2521636  
328.9260167  
0.398215517  
8.362525849  
5029.063759  
10.35360343  
68.89128438  
1459.459868  
1227.698438  
209.4613617

1.991077583  
25.88400858  
13.93754308  
73.27165506  
964.4779813  
1558.615532  
391.8440684  
16.7250517  
131.4111205  
131.4111205  
1.991077583  
56.54660336  
6.769663783  
50.17515509  
422.9048787  
626.7912232  
961.6904727  
1.19464655  
44.20192235  
15.92862067  
381.0922494  
246.8936203  
40.6179827  
1.592862067  
1192.257257  
209.8595773  
49.77693958  
24.29114651  
108.3146205  
64.11269818  
732.7165506  
107.5181895  
8.760741366  
115.0842843  
107.119974  
1249.600291  
425.6923873  
144.154017  
35.8393965  
942.5761279  
935.4082486  
826.297197  
36.63582753

9.557172399  
151.3218963  
346.0492839  
327.3331547  
187.9577238  
483.8318527  
716.7879299  
5.176801716  
230.1685686  
263.618672  
7.167879299  
50.97158613  
393.0387149  
811.1650074  
1369.463162  
2119.701195  
739.0879989  
30.26437926  
490.999732  
2796.667573  
535.9980854  
5620.812017  
17.52148273  
53.36087923  
3.185724133  
228.9739221  
26.2822241  
27.87508616  
62.51983611  
9.955387916  
1979.927549  
2.3892931  
0.398215517  
13.53932757  
19.91077583  
244.9025427  
1163.58574  
1.592862067  
25.08757755  
33.84831891  
92.78421537  
51.36980164  
30.26437926

1211.769817  
127.8271808  
724.3540247  
191.939879  
360.7832581  
512.5033699  
96.36815502  
151.3218963  
1287.430765  
1361.897067  
265.2115341  
9.557172399  
409.3655511  
19.91077583  
48.18407751  
1.991077583  
0.796431033  
1.592862067  
33.4501034  
143.357586  
41.41441373  
3365.319331  
157.6933446  
136.5879222  
63.31626714  
844.6151108  
374.3225856  
103.5360343  
10.35360343  
77.65202574  
704.8414644  
229.3721376  
66.90020679  
3.185724133  
1759.316152  
3.982155166  
175.6130428  
541.5731026  
40.21976718  
2.787508616  
41.81262925  
41.01619821  
103.5360343

930.6296624  
60.92697404  
868.1098262  
68.09485334  
121.4557326  
347.642146  
1.19464655  
56.94481888  
14.73397412  
27.87508616  
721.5665161  
214.6381635  
0.398215517  
101.9431723  
140.1718619  
75.26273264  
9.557172399  
467.903232  
672.1877921  
8.760741366  
92.38599986  
112.6949912  
27.87508616  
3.58393965  
454.3639045  
0.398215517  
37.03404305  
0.398215517  
1090.314085  
11.9464655  
934.6118175  
3.58393965  
0.398215517  
287.1133875  
2.3892931  
15.53040515  
837.4472315  
41.41441373  
611.260818  
15.13218963  
580.9964388  
4.7785862  
5.176801716



154.5076205  
212.2488704  
7.964310333  
41.81262925  
171.6308877  
1.991077583  
5.973232749  
688.1164127  
64.90912921  
465.5139389  
1.592862067  
100.3503102  
53.36087923  
14.73397412  
260.8311634  
187.5595083  
175.6130428  
432.0638355  
18.31791376  
45.3965689  
809.9703608  
1136.507084  
16.7250517  
28.27330168  
373.5261546  
7.566094816  
90.39492227  
11.54824998  
477.0621889  
153.3129739  
19.1143448  
1.991077583  
610.0661715  
45.79478441  
36.23761201  
5.575017233  
184.3737842  
1109.030214  
84.42168952  
23.49471548  
406.5780425  
15.92862067  
62.12162059

24.29114651  
2.3892931  
5.973232749  
193.5327411  
111.8985602  
1684.451635  
0.398215517  
56.54660336  
6.371448266  
5.176801716  
55.75017233  
4.7785862  
2088.640385  
152.1183274  
15.92862067  
29.06973271  
180.7898445  
10.75181895  
59.73232749  
54.95374129  
5.973232749  
49.37872406  
89.59849124  
441.6210079  
30.66259478  
27.07865513  
1.991077583  
182.7809221  
7.566094816  
3.58393965  
11.9464655  
517.6801716  
168.4451635  
55.75017233  
37.03404305  
27.87508616  
0.398215517  
789.6613695  
11.9464655  
18.71612928  
17.91969825  
0.796431033  
3473.235736

111.5003447  
1.19464655  
1429.99192  
37.83047408  
144.5522325  
27.87508616  
196.7184652  
46.98943096  
71.28057748  
18.71612928  
64.51091369  
89.59849124  
53.75909474  
5.973232749  
14.3357586  
2760.828177  
277.5562151  
2.3892931  
203.0899135  
1.19464655  
1396.143601  
17.52148273  
213.4435169  
17.12326721  
43.0072758  
1.592862067  
1248.405645  
1.991077583  
1.19464655  
70.88236196  
458.3460596  
392.2422839  
569.0499733  
34.24653443  
18.31791376  
126.6325343  
630.3751628  
50.17515509  
0.398215517  
1568.172704  
27.47687065  
5.575017233  
3.185724133

1.991077583  
37.03404305  
0.398215517  
38.2286896  
283.5294478  
87.60741366  
459.1424907  
0.796431033  
20.30899135  
0.796431033  
19.91077583  
208.6649307  
20.70720686  
196.7184652  
1.19464655  
1027.396033  
4.380370683  
58.93589646  
161.6754998  
1.592862067  
0.398215517  
45.3965689  
1.19464655  
1.19464655  
49.37872406  
15.53040515  
15.53040515  
6.769663783  
39.02512063  
301.8473616  
19.91077583  
19.91077583  
199.5059738  
39.02512063  
1.991077583  
195.9220342  
8.362525849  
110.3056981  
29.46794823  
80.83774988  
3.982155166  
6.769663783  
8.362525849

19.1143448  
113.0932067  
196.7184652  
17.12326721  
77.65202574  
5217.021483  
1.592862067  
33.84831891  
1.592862067  
370.738646  
38.62690511  
143.7558015  
31.0608103  
32.25545685  
389.8529908  
486.6193613  
57.34303439  
153.7111894  
479.451482  
13.53932757  
15.92862067  
35.8393965  
229.3721376  
0.796431033  
3.982155166  
56.14838784  
2832.108754  
1455.875929  
11.9464655  
0.796431033  
1.19464655  
16.7250517  
1.19464655  
267.9990427  
0.796431033  
5.176801716  
101.9431723  
34.64474995  
51.36980164  
7.566094816  
24.29114651  
133.4021981  
22.69828445

27.07865513  
228.9739221  
11.15003447  
101.9431723  
21.5036379  
0.398215517  
4.7785862  
12.74289653  
0.796431033  
3.185724133  
37.03404305  
7.964310333  
6.769663783  
42.60906028  
33.4501034  
2.787508616  
6.769663783  
206.2756376  
1234.069886  
29.06973271  
128.6236119  
25.88400858  
2.3892931  
14.3357586  
19.51256031  
1.19464655  
2.3892931  
43.40549131  
10.75181895  
93.58064641  
31.85724133  
15.13218963  
1.19464655  
8.760741366  
4.7785862  
4.7785862  
236.5400169  
6.371448266  
423.7013097  
196.3202497  
71.67879299  
22.69828445  
15.53040515

1.19464655  
5.973232749  
1437.956231  
71.28057748  
70.88236196  
569.4481888  
2.787508616  
18.71612928  
1.592862067  
15.92862067  
53.75909474  
163.6665773  
1.592862067  
20.70720686  
18.31791376  
1.991077583  
9.557172399  
106.3235429  
477.85862  
1.991077583  
172.0291032  
16.32683618  
2.787508616  
1.19464655  
0.796431033  
620.8179904  
397.4190856  
43.40549131  
2.787508616  
1218.539481  
54.95374129  
23.49471548  
47.785862  
0.398215517  
73.27165506  
99.15566364  
6.371448266  
25.88400858  
116.6771464  
9.158956882  
41.01619821  
4.380370683  
1.991077583

32.65367236  
82.03239643  
28.27330168  
9.158956882  
1.19464655  
23.892931  
16.32683618  
507.3265682  
2.787508616  
4.380370683  
6.371448266  
891.6045417  
199.1077583  
373.1279391  
7.167879299  
11.15003447  
20.70720686  
14.3357586  
5.176801716  
10.75181895  
393.0387149  
314.5902581  
8.760741366  
0.398215517  
7.167879299  
95.57172399  
50.97158613  
115.0842843  
2.3892931  
94.37707744  
168.046948  
279.9455082  
26.68043961  
23.09649996  
15.92862067  
50.17515509  
13.53932757  
33.05188788  
31.0608103  
102.7396033  
4.7785862  
1.19464655  
13.53932757



3.58393965  
8.362525849  
2.3892931  
40.6179827  
25.88400858  
68.49306886  
128.2253964  
255.6543617  
578.2089301  
13.53932757  
8.760741366  
0.398215517  
4.380370683  
3.58393965  
62.51983611  
17.12326721  
923.0635675  
264.0168875  
8.760741366  
21.5036379  
56.14838784  
15.13218963  
158.0915601  
111.1021291  
74.46630161  
100.3503102  
0.398215517  
1.19464655  
95.17350847  
24.68936203  
19.1143448  
997.5298692  
197.5148962  
434.8513442  
94.77529296  
31.0608103  
75.66094816  
86.81098262  
246.4954048  
2.787508616  
1.592862067  
168.046948  
39.02512063

10.35360343  
15.92862067  
31.85724133  
644.3127059  
23.49471548  
179.1969825  
0.398215517  
5.973232749  
140.9682929  
21.90185341  
437.2406373  
23.09649996  
479.0532665  
108.3146205  
81.63418091  
3.58393965  
119.464655  
7.167879299  
18.71612928  
58.93589646  
62.12162059  
0.796431033  
52.56444819  
12.34468102  
0.796431033  
7.167879299  
647.49843  
234.1507238  
23.09649996  
9.158956882  
460.3371372  
0.398215517  
1.991077583  
166.0558704  
1.991077583  
134.1986291  
2.787508616  
237.3364479  
8.760741366  
3.982155166  
84.81990504  
0.796431033  
2.3892931

9.158956882  
0.398215517  
0.796431033  
10.35360343  
2.3892931  
17.12326721  
10.75181895  
0.398215517  
76.05916368  
13.14111205  
594.5357663  
209.0631462  
323.749215  
81.63418091  
57.74124991  
150.9236808  
19.51256031  
93.18243089  
123.8450257  
0.796431033  
20.70720686  
7.566094816  
37.43225856  
1.19464655  
271.1847668  
86.41276711  
1.19464655  
45.79478441  
5.575017233  
0.398215517  
103.5360343  
68.49306886  
0.796431033  
1.592862067  
56.94481888  
63.71448266  
33.05188788  
63.31626714  
101.5449567  
7.964310333  
1.19464655  
1.991077583  
59.73232749

23.09649996  
121.0575171  
6.371448266  
20.30899135  
39.82155166  
10.35360343  
294.2812668  
21.5036379  
6.769663783  
232.9560772  
6.371448266  
61.72340508  
36.63582753  
25.88400858  
48.58229303  
203.8863445  
1.19464655  
1.19464655  
3.982155166  
142.9593705  
43.40549131  
7.167879299  
19.91077583  
0.796431033  
15.13218963  
4.7785862  
46.19299993  
3.982155166  
3.982155166  
8.760741366  
3.58393965  
3.58393965  
207.8684997  
32.25545685  
161.6754998  
267.2026117  
30.26437926  
8.362525849  
115.0842843  
5.176801716  
4.380370683  
109.5092671  
48.18407751

59.33411198  
9.557172399  
28.27330168  
29.46794823  
57.34303439  
26.68043961  
6.769663783  
7.964310333  
2.3892931  
23.892931  
25.88400858  
281.9365858  
109.1110516  
10.75181895  
2089.0386  
143.357586  
10.35360343  
43.40549131  
26.68043961  
2.787508616  
4.380370683  
1.19464655  
7.964310333  
70.88236196  
220.6113962  
0.796431033  
191.143448  
276.7597841  
85.21812056  
1.991077583  
645.905568  
39.82155166  
17.52148273  
1.991077583  
12.74289653  
28.6715172  
4.7785862  
35.8393965  
136.5879222  
33.4501034  
27.87508616  
1.19464655  
69.28949989

7.964310333  
9.557172399  
76.45737919  
1044.121085  
18.31791376  
41.41441373  
6.371448266  
5.973232749  
62.51983611  
157.6933446  
8.760741366  
62.91805163  
17.52148273  
422.9048787  
7.964310333  
1.592862067  
165.6576549  
1.991077583  
5.973232749  
2.3892931  
250.47756  
17.12326721  
1.592862067  
53.75909474  
168.843379  
19.51256031  
8.760741366  
6.371448266  
4.380370683  
0.796431033  
123.8450257  
557.1035078  
166.0558704  
83.62525849  
3.58393965  
20.30899135  
11.15003447  
0.796431033  
11.9464655  
0.398215517  
7.566094816  
12.34468102  
8.362525849

57.74124991  
3.982155166  
74.46630161  
119.8628705  
157.6933446  
34.24653443  
19.91077583  
18.71612928  
338.4831891  
95.96993951  
70.48414644  
103.1378188  
3.58393965  
57.34303439  
13.14111205  
4.7785862  
1.592862067  
2.3892931  
82.43061194  
51.76801716  
10.35360343  
5.176801716  
135.3932757  
4.380370683  
164.8612239  
2.787508616  
506.1319216  
561.4838784  
46.19299993  
561.4838784  
160.4808532  
1.19464655  
6.371448266  
20.70720686  
281.5383703  
10.35360343  
312.5991806  
0.796431033  
55.75017233  
146.5433101  
300.2544995  
7.964310333  
50.17515509

154.1094049  
13.93754308  
151.7201118  
13.93754308  
5.973232749  
3.185724133  
2.787508616  
435.6477752  
4.380370683  
3.58393965  
252.8668531  
812.3596539  
1747.767902  
347.2439305  
644.7109214  
1211.769817  
204.6827755  
0.398215517  
1.19464655  
239.725741  
13.14111205  
23.09649996  
9.158956882  
3.58393965  
4.7785862  
11.54824998  
255.6543617  
441.6210079  
1.19464655  
1.991077583  
26.2822241  
173.6219652  
1243.228843  
2.787508616  
51.36980164  
27.47687065  
5.973232749  
1.592862067  
15.13218963  
116.2789309  
1.19464655  
224.1953359  
146.5433101



13.14111205  
0.796431033  
2.787508616  
0.398215517  
3.58393965  
188.3559394  
72.07700851  
15.13218963  
43.80370683  
25.08757755  
26.68043961  
380.2958184  
3.58393965  
5.973232749  
223.0006893  
29.46794823  
18.31791376  
280.7419392  
235.7435858  
104.3324654  
560.2892319  
43.0072758  
3.185724133  
26.2822241  
12.34468102  
62.91805163  
513.2998009  
181.5862756  
26.68043961  
126.2343188  
4.7785862  
52.96266371  
9.955387916  
5.176801716  
202.691698  
2.3892931  
21.10542238  
2.3892931  
395.428008  
52.96266371  
41.41441373  
0.796431033  
252.070422

63.71448266  
4.7785862  
135.3932757  
507.7247837  
4.7785862  
51.36980164  
5.973232749  
60.92697404  
15.53040515  
1.19464655  
0.398215517  
1028.590679  
0.398215517  
3.185724133  
3.982155166  
8.760741366  
46.59121545  
7.167879299  
19.91077583  
78.05024126  
16.32683618  
0.398215517  
7.566094816  
38.2286896  
11.9464655  
11.15003447  
3.58393965  
4.380370683  
0.796431033  
10.75181895  
10.35360343  
34.64474995  
0.398215517  
489.4068699  
13.14111205  
7.167879299  
3.58393965  
1.991077583  
1.592862067  
12.34468102  
9.955387916  
13.53932757  
1345.968446

124.2432412  
134.5968446  
266.0079651  
60.13054301  
5.575017233  
9.158956882  
9.557172399  
5.973232749  
45.3965689  
83.22704298  
30.66259478  
10.75181895  
2.787508616  
50.97158613  
0.796431033  
317.7759823  
38.2286896  
1.991077583  
115.8807153  
71.28057748  
140.5700774  
16.32683618  
2.787508616  
143.357586  
125.8361033  
62.91805163  
24.68936203  
4.7785862  
29.46794823  
557.5017233  
195.9220342  
232.1596462  
0.398215517  
174.8166118  
343.2617753  
267.6008272  
9.158956882  
7.167879299  
7.167879299  
10.35360343  
11.15003447  
25.88400858  
2.3892931

1.991077583  
51.76801716  
1.19464655  
1258.759248  
41.01619821  
8.362525849  
8.362525849  
188.3559394  
60.52875853  
580.9964388  
37.43225856  
158.8879911  
203.8863445  
277.1579996  
9.557172399  
5.973232749  
46.98943096  
10.35360343  
242.9114651  
41.01619821  
0.398215517  
500.5569044  
293.8830513  
41.41441373  
21.10542238  
386.6672666  
9.158956882  
0.398215517  
0.398215517  
3.185724133  
137.7825688  
1.991077583  
14.3357586  
68.09485334  
11.15003447  
89.59849124  
163.6665773  
2.3892931  
17.12326721  
14.73397412  
2.787508616  
20.30899135  
845.4115418

1.991077583  
13.14111205  
332.5099564  
758.6005592  
435.2495597  
25.88400858  
23.49471548  
10.35360343  
182.7809221  
0.796431033  
91.19135331  
1.991077583  
37.03404305  
32.65367236  
159.6844222  
884.0384469  
1.991077583  
24.29114651  
428.8781114  
16.7250517  
63.31626714  
46.19299993  
97.96101709  
99.55387916  
1.991077583  
8.760741366  
62.91805163  
37.03404305  
70.08593093  
144.5522325  
20.70720686  
2.3892931  
5.973232749  
31.85724133  
1.991077583  
145.3486636  
622.012637  
397.4190856  
26.68043961  
6.371448266  
7.566094816  
17.91969825  
195.9220342

46.59121545  
258.8400858  
6.769663783  
11.15003447  
0.796431033  
8.362525849  
440.8245769  
594.9339818  
1.592862067  
3.982155166  
13.53932757  
8.362525849  
373.9243701  
403.3923183  
58.53768094  
6.769663783  
15.92862067  
185.5684307  
539.582025  
151.3218963  
57.34303439  
114.6860688  
452.7710424  
686.9217662  
77.65202574  
5.176801716  
2.787508616  
159.6844222  
60.52875853  
43.40549131  
75.66094816  
7.566094816  
285.9187409  
66.50199128  
21.5036379  
172.4273187  
13.93754308  
0.796431033  
5.575017233  
742.273723  
0.398215517  
500.9551199  
280.7419392

33.84831891  
664.6216973  
680.5503179  
352.4207322  
13.93754308  
1146.860688  
32.65367236  
99.15566364  
26.2822241  
478.655051  
13.53932757  
22.30006893  
658.250249  
36.23761201  
3.185724133  
1420.036532  
1.19464655  
130.2164739  
379.4993873  
72.87343954  
185.1702152  
207.4702842  
5.973232749  
19.51256031  
5.176801716  
12.74289653  
391.4458528  
20.70720686  
273.1758444  
750.2380333  
22.69828445  
138.9772153  
222.6024738  
50.57337061  
298.263422  
323.3509995  
5.575017233  
66.10377576  
1.592862067  
743.4683695  
5.575017233  
87.20919814  
4.380370683

94.77529296  
51.36980164  
4.380370683  
77.65202574  
49.37872406  
28.27330168  
1.991077583  
169.6398101  
187.5595083  
1.19464655  
61.32518956  
12.74289653  
256.8490082  
640.3305507  
66.50199128  
3.982155166  
60.13054301  
113.4914222  
27.47687065  
128.2253964  
20.70720686  
11.15003447  
7.566094816  
1070.403309  
149.3308187  
293.0866202  
115.4824998  
500.5569044  
45.79478441  
14.73397412  
37.83047408  
275.166922  
12.34468102  
5.176801716  
356.8011029  
95.96993951  
1.592862067  
205.8774221  
2954.360918  
48.58229303  
108.3146205  
221.4078272  
39.42333615



2.3892931  
127.0307498  
31.0608103  
7.167879299  
323.749215  
95.17350847  
2.3892931  
16.32683618  
98.75744812  
1.19464655  
1.19464655  
341.6689133  
170.8344566  
266.8043961  
590.5536112  
149.7290343  
17.52148273  
3.58393965  
63.71448266  
41.41441373  
1.19464655  
82.82882746  
10.35360343  
2.3892931  
1036.55499  
601.3054301  
2471.325496  
119.0664395  
10.35360343  
11.15003447  
8.362525849  
9.158956882  
305.8295168  
76.85559471  
23.892931  
144.154017  
14.73397412  
24.29114651  
69.28949989  
81.23596539  
19.51256031  
59.33411198  
50.57337061

22.69828445  
43.0072758  
7.964310333  
1240.441334  
2077.888566  
750.2380333  
865.7205331  
0.796431033  
887.224171  
2.3892931  
314.5902581  
1231.282377  
38.2286896  
340.4742667  
169.6398101  
1589.676342  
422.9048787  
1031.776404  
109.9074826  
3.58393965  
433.2584821  
35.44118098  
2.3892931  
3.58393965  
31.0608103  
13.93754308  
9.557172399  
1222.521636  
713.6022058  
9.557172399  
3.58393965  
1.991077583  
3.185724133  
0.398215517  
1088.721222  
134.1986291  
0.398215517  
0.398215517  
1.19464655  
362.3761201  
0.398215517  
78.44845678  
62.12162059

151.3218963  
11.15003447  
698.4700162  
44.99835338  
37.43225856  
880.8527228

| Spacer Sequence        | Location | Strand | PAM | Reads | Replicate 2 |
|------------------------|----------|--------|-----|-------|-------------|
| TTTGTAACAACACTGATATTAA | 21       | -      | AGG | 74    |             |
| TTTAATATCAGTTGTTACAA   | 39       | +      | AGG | 181   |             |
| AGCGTCTTTAAAAATAAAAA   | 68       | +      | AGG | 2     |             |
| GCGTCTTTAAAAATAAAAA    | 69       | +      | GGG | 370   |             |
| AAATAAAAAAGGGCAGAAAA   | 79       | +      | AGG | 11    |             |
| AATAAAAAAGGGCAGAAAA    | 80       | +      | GGG | 122   |             |
| AGAAAAACTTGTGTACTAAA   | 93       | -      | AGG | 1632  |             |
| AGATGAAAAACGACTATAA    | 165      | -      | AGG | 2311  |             |
| AAAGCAATTATGAAAAGAGT   | 194      | -      | AGG | 889   |             |
| TACACACATAAGTTTATTGG   | 234      | -      | CGG | 1151  |             |
| GCATACACACATAAGTTTAT   | 237      | -      | TGG | 2032  |             |
| AAGTTACTACTCACACTA     | 259      | -      | AGG | 7383  |             |
| ATTTAATGATTCTGCAGCTG   | 308      | +      | AGG | 2683  |             |
| GAAATCCTATGCAAGGCAGT   | 331      | -      | AGG | 3288  |             |
| TGCCAAGGAAATCCTATGCA   | 338      | -      | AGG | 3547  |             |
| TGCCTTGCATAGGATTTCTT   | 352      | +      | TGG | 741   |             |
| TTTATATTCACAACCTTGCCA  | 353      | -      | AGG | 3895  |             |
| AACCAAGCTATGTTGATAGA   | 376      | -      | GGG | 194   |             |
| AACCCTCTATCAACATAGCT   | 390      | +      | TGG | 1489  |             |
| AAATAAAAAGATGCAACAAT   | 399      | -      | GGG | 7227  |             |
| AAAATAAAAAGATGCAACAA   | 400      | -      | TGG | 295   |             |
| ATTTGCTATCCTTGAATTGA   | 461      | +      | TGG | 778   |             |
| GGTATGACTTTGGCCGAAC    | 479      | -      | AGG | 10688 |             |
| GGCGATTTTTCTTCCTAGTT   | 482      | +      | CGG | 42    |             |
| AGAAAAACAAGGTATGACTT   | 489      | -      | TGG | 1455  |             |
| AAACAATCAAGAGAAAAACA   | 500      | -      | AGG | 683   |             |
| TAATAGAACTATCAAGTAAA   | 556      | -      | AGG | 193   |             |
| TCTATTATAAGGAAAACTTT   | 588      | +      | CGG | 633   |             |
| TTATCATGATGTTACAAAAG   | 637      | -      | AGG | 2449  |             |
| GATTACTTACGTAATGCGAA   | 676      | +      | AGG | 2713  |             |
| TTCAAAGTTTAGTATCTAT    | 698      | -      | AGG | 18997 |             |
| TAACTTTTGAAATCTAAAA    | 725      | +      | TGG | 172   |             |
| GACACCAATTTCTTCAGAAA   | 756      | -      | GGG | 1398  |             |
| TGACACCAATTTCTTCAGAA   | 757      | -      | AGG | 52    |             |
| AAAACCCTTTCTGAAGAAAT   | 768      | +      | TGG | 1243  |             |
| ACTTTATCTAACATGATACA   | 804      | +      | CGG | 8729  |             |
| CTTTATCTAACATGATACAC   | 805      | +      | GGG | 15515 |             |
| CCATTTATTACCGGGTAGGA   | 821      | -      | TGG | 5111  |             |
| AATACCATTTATTACCGGGT   | 825      | -      | AGG | 2420  |             |
| GAGAACAAAACCATCCTACC   | 827      | +      | CGG | 17109 |             |
| AAATAAATACCATTTATTAC   | 830      | -      | CGG | 1454  |             |
| CCATCCTACCCGGTAATAAA   | 837      | +      | TGG | 5575  |             |

|                       |        |     |       |
|-----------------------|--------|-----|-------|
| AAAATATCTCTTCCTTCTTG  | 869 -  | AGG | 4648  |
| TTAGAATTGACACCTCAAGA  | 873 +  | AGG | 17740 |
| AAAAAGAAAGTTTTAACTTA  | 927 +  | AGG | 1245  |
| AAGAAAGTTTTAACTTAAGG  | 930 +  | AGG | 4158  |
| ACTTAAGGAGGAACAACAAA  | 942 +  | TGG | 6     |
| TTGATTTCGTGCCACTGTGC  | 993 -  | GGG | 19034 |
| GTTGATTTCTGTGCCACTGTG | 994 -  | CGG | 1685  |
| AGCAATTCACACCCGCACAG  | 998 +  | TGG | 33743 |
| GAAATCAACAGAATTATTGA  | 1024 + | CGG | 1     |
| GTCGTGCGAGTTGTAGCTCGG | 1048 - | CGG | 990   |
| TTGGTCTGTCGAGTTGTAGCT | 1051 - | CGG | 4235  |
| TTTTAATAACCTCAACATCT  | 1070 - | TGG | 14436 |
| ACTCGACGACCAAGATGTTG  | 1077 + | AGG | 8119  |
| AGTTATTCAAAAATCACGAA  | 1154 + | AGG | 854   |
| GTGAATTGCTAGTAGTGTGT  | 1181 - | TGG | 15299 |
| GAAACAATCTTTATAAACGC  | 1308 + | AGG | 1174  |
| GAATTAGCTATCATAACTTC  | 1365 + | TGG | 3986  |
| TTATCTAATTGTTTATCGAT  | 1389 + | TGG | 8679  |
| ATTGGAGCATGCAAATAACT  | 1407 + | TGG | 9048  |
| TCTGATGAATATTCATCTCT  | 1424 - | CGG | 31754 |
| AACACCTATTAACGTAGTAT  | 1449 - | TGG | 17762 |
| GATTCCAATACTACGTTAAT  | 1461 + | AGG | 13894 |
| GTTGTAGCTTTTCTAGCTTT  | 1646 - | AGG | 66    |
| ATTTAAGGTGGTTATTCTTA  | 1698 - | TGG | 2577  |
| TTGTTATCAAATATTTAAGG  | 1710 - | TGG | 3345  |
| ATGTTGTTATCAAATATTTA  | 1713 - | AGG | 6379  |
| TTACAAACAAAATCGAACAT  | 1802 + | CGG | 616   |
| AATATTCAAGAAAAAGAAAA  | 1835 + | TGG | 17    |
| AAGAGAGTTATATAAAGCTT  | 1876 + | TGG | 10403 |
| TTAAAAAGCGTTTTAGCGCT  | 1902 + | TGG | 9     |
| TAAAAAGCGTTTTAGCGCTT  | 1903 + | GGG | 707   |
| TGAAGCATTTCAAAGAAAAT  | 1938 + | AGG | 222   |
| GAAGCATTTCAAAGAAAATA  | 1939 + | GGG | 147   |
| TACAAGTGTA CTTACAAGTA | 1966 + | CGG | 7930  |
| ACAAGTACGGTTGTTAATAA  | 1979 + | CGG | 2643  |
| AAACATGTTGCGATGATGTC  | 2048 + | AGG | 59970 |
| ATGATGTCAGGTACAGAAAA  | 2060 + | AGG | 389   |
| TGTTCCATGCTTTTTCAATT  | 2091 - | TGG | 10306 |
| TCATCCAAATTGAAAAAGCA  | 2103 + | TGG | 2077  |
| GCACGTTGCATAATCATTTT  | 2116 - | TGG | 4932  |
| GCATCTGCAAATACAATTTT  | 2197 - | TGG | 793   |
| ACTAAGACATCAATTTTAGT  | 2246 + | TGG | 5823  |
| GCAAAGATCATTAACAAAA   | 2276 + | CGG | 1511  |

|                      |        |     |       |
|----------------------|--------|-----|-------|
| AAACAAAACGGTATAAACAT | 2288 + | CGG | 86    |
| AACAAAACGGTATAAACATC | 2289 + | GGG | 7615  |
| GGCAACGCAGATTGTTTGAG | 2310 + | TGG | 1310  |
| TTTGAGTGGTTACGTCAAAA | 2324 + | CGG | 325   |
| CCACACCCTTGCGTTTAATA | 2334 - | AGG | 6202  |
| CGGATTCCTTATTAACGCA  | 2344 + | AGG | 2051  |
| GGATTCCTTATTAACGCAA  | 2345 + | GGG | 3912  |
| CCTTATTAACGCAAGGGTG  | 2350 + | TGG | 1082  |
| CGTTCCATTGAATACTGTGT | 2368 - | AGG | 43714 |
| CATGCCTACACAGTATTCAA | 2380 + | TGG | 4208  |
| AGAAACATCAATCACACATT | 2425 + | CGG | 3750  |
| ACATCAATCACACATTCGGA | 2429 + | CGG | 2290  |
| TGTCCTTTACCTGTTACTTT | 2458 - | TGG | 11332 |
| AGTAAGACGCCAAAAGTAAC | 2465 + | AGG | 14780 |
| ACGCCAAAAGTAACAGGTAA | 2471 + | AGG | 1661  |
| TACTTTGTTAACAAGTTTTT | 2501 + | AGG | 13    |
| AGAAAAACAAACAACCTAAT | 2524 + | AGG | 14250 |
| AACTGCCATTGTGATGAGGA | 2564 - | GGG | 321   |
| CAACTGCCATTGTGATGAGG | 2565 - | AGG | 148   |
| TCACAACTGCCATTGTGATG | 2568 - | AGG | 162   |
| AACAACCCTCCTCATCACAA | 2575 + | TGG | 1995  |
| AATGGCAGTTGTGACGTGGA | 2593 + | AGG | 184   |
| CAGTTGTGACGTGGAAGGTT | 2598 + | TGG | 2770  |
| AACGCCCTGCTACTAATCAC | 2629 - | AGG | 4601  |
| GAAAACCTGTGATTAGTAGC | 2640 + | AGG | 2775  |
| ATTTTCAGCATCTTTCGGTA | 2681 - | TGG | 5510  |
| GTAGAATTTTCAGCATCTTT | 2686 - | CGG | 8306  |
| TTTGTTTCGGCGAACTTCAA | 2724 - | AGG | 6245  |
| TTATTTGCTAATAGTTTGTT | 2738 - | CGG | 4527  |
| GTTGGTGGTACTATGATTTT | 2793 - | TGG | 83    |
| TATGTGTTTTCTGGTGTGG  | 2808 - | TGG | 1510  |
| CTATATGTGTTTTCTGGTGT | 2811 - | TGG | 8989  |
| TCGCCTCTATATGTGTTTTC | 2817 - | TGG | 58    |
| ACACCAGAAAACACATATAG | 2830 + | AGG | 6468  |
| ACACAAATCCATCAATTGTT | 2890 + | TGG | 8805  |
| GTAGAAGTACAGTATACAAC | 2918 + | TGG | 20869 |
| TATTACCGCAAAGATAATTT | 2947 + | AGG | 2461  |
| ATATTAATCAGAGTGCCTGT | 2982 - | TGG | 8273  |
| TACATTGATTATTCACCAAC | 2983 + | AGG | 4359  |
| TCTGATTAATATTTCTAAAT | 3009 + | TGG | 5548  |
| TGATCAGAAAGCATAAAAAA | 3041 + | TGG | 12    |
| AAAGCATAAAAAATGGTATT | 3048 + | AGG | 3245  |
| GCATAAAAAATGGTATTAGG | 3051 + | AGG | 793   |

|                       |        |     |       |
|-----------------------|--------|-----|-------|
| TGAAGCATAATACTGCTACT  | 3088 - | AGG | 23247 |
| GCTGTAGTGAAGTATAGAAA  | 3134 - | CGG | 3260  |
| TTCTATACTTCACTACAGCA  | 3154 + | TGG | 3397  |
| CACTACAGCATGGTCAATTG  | 3164 + | CGG | 6     |
| ACTACAGCATGGTCAATTGC  | 3165 + | GGG | 815   |
| ATAAAAAAACTGCTACTTGT  | 3239 + | TGG | 29511 |
| GTTCAATATAAAACGAAAAA  | 3300 + | CGG | 285   |
| CAATATAAAACGAAAAACGG  | 3303 + | AGG | 1542  |
| GTCAAGATGTATTACGAAAT  | 3328 + | AGG | 4400  |
| CGCAAAAATATTCATGTTAA  | 3361 + | CGG | 4107  |
| TTTAAGCTATTCATTTTAAA  | 3391 + | AGG | 33    |
| ATTCATTTTAAAAGGTCATA  | 3399 + | TGG | 532   |
| TTCATTTTAAAAGGTCATAT  | 3400 + | GGG | 3338  |
| ACGACATAAGCATGTTTAAT  | 3441 - | TGG | 12864 |
| AGATGAGAATGACTTAGATA  | 3480 + | TGG | 861   |
| CAATCCATTCATCTATTGCT  | 3503 - | TGG | 34893 |
| TTAACCAAGCAATAGATGAA  | 3515 + | TGG | 829   |
| TGAAGAGAACACAGACGAAC  | 3540 + | AGG | 17221 |
| TAATTAAGTATGATGAAA    | 3569 + | TGG | 2324  |
| TAACTTAGTCATGAAATGGT  | 3573 + | AGG | 3643  |
| CTTAGTCATGAAATGGTAGG  | 3576 + | AGG | 5     |
| TAACTTATATCATTGTCAT   | 3617 + | AGG | 8856  |
| AACTTATATCATTGTCATA   | 3618 + | GGG | 10766 |
| GGTTTGTAGTTATATAAAT   | 3630 - | TGG | 3579  |
| ATATCTGAATTGTTATCAGT  | 3651 - | TGG | 16568 |
| CCTAGCTCTATTTCTATTTG  | 3682 - | TGG | 1170  |
| CCACAAATAGAAATAGAGCT  | 3698 + | AGG | 1977  |
| CACAAATAGAAATAGAGCTA  | 3699 + | GGG | 898   |
| AATAGAGCTAGGGAGTTTAA  | 3709 + | CGG | 2603  |
| AGCTAGGGAGTTTAAACGGTA | 3714 + | TGG | 3049  |
| GGAAGAAGCGAGTATCAATA  | 3735 + | TGG | 214   |
| GACAGAAACTATTGAGTACG  | 3786 + | AGG | 10174 |
| GAGGAGGTAGAACATGACTG  | 3805 + | AGG | 5     |
| AGTATGCTTACTTTTTCTTG  | 3823 - | TGG | 35193 |
| ATATCGCTGAGAAAAATAAA  | 3882 + | AGG | 164   |
| TTCTATAAATTTGCAGTATA  | 3908 + | CGG | 979   |
| TTTGCAGTATACGGAAAAAT  | 3917 + | TGG | 3094  |
| GTATACGGAAAAATTGGCTC  | 3923 + | AGG | 418   |
| TTTATCTCTGTAGCAAACG   | 3935 - | TGG | 2193  |
| TTCGTCATTGACATTAACGA  | 3980 + | AGG | 2625  |
| GTCATTGACATTAACGAAGG  | 3983 + | TGG | 330   |
| CATTAACGAAGGTGGAACAA  | 3991 + | CGG | 6822  |
| GGAACAACGGTTACTGACGA  | 4004 + | AGG | 1414  |

|                      |        |     |       |
|----------------------|--------|-----|-------|
| CTCATCTCCTGTAAAATTTG | 4066 - | AGG | 2391  |
| TTTTTTACCTCAAATTTTAC | 4075 + | AGG | 3672  |
| TTACAGGAGATGAGAGAAAA | 4091 + | CGG | 907   |
| TCTCCCAATCATTAAACGT  | 4186 - | TGG | 2075  |
| AAAAACCAACGTTTAATGAT | 4197 + | TGG | 2718  |
| AAAACCAACGTTTAATGATT | 4198 + | GGG | 287   |
| AAACCAACGTTTAATGATTG | 4199 + | GGG | 10    |
| GTCAGTATGTACAGATTAAT | 4241 + | AGG | 17749 |
| CATGACCTGTAATAACAAAG | 4272 - | TGG | 2096  |
| AAATTCCACTTTGTTATTAC | 4283 + | AGG | 5223  |
| TTTGTTATTACAGGTCATGA | 4292 + | AGG | 4     |
| AACAAAGATAAAGATGATGA | 4319 + | AGG | 2     |
| GCGCTTCAATAGTGATAGTA | 4338 - | GGG | 21139 |
| TGCGCTTCAATAGTGATAGT | 4339 - | AGG | 5612  |
| CTCAAAGTGATGTGTTAGCT | 4404 + | AGG | 5169  |
| TCAAAGTGATGTGTTAGCTA | 4405 + | GGG | 4257  |
| ATTGAAGAATTTGATGATAA | 4433 + | CGG | 21    |
| TTATTGTTAATTGTTATTGA | 4510 - | AGG | 474   |
| TCTACTACGTCCGTAATGCT | 4546 - | AGG | 8864  |
| ATTTGCAAATCCTAGCATT  | 4552 + | CGG | 2761  |
| GTAGTAGAAGCAATTAGAAA | 4577 + | TGG | 2570  |
| GAAACTAAAAATTAATTA   | 4599 + | AGG | 6     |
| CTAAAAATTAATTAAGGA   | 4603 + | CGG | 155   |
| TATTTAATTATGAAAATCAC | 4626 + | AGG | 1763  |
| AATCAAGAAAAGTTTTATAA | 4674 + | CGG | 105   |
| AAGTTTTATAACGGCTCAGC | 4683 + | AGG | 1106  |
| AGTTTTATAACGGCTCAGCA | 4684 + | GGG | 6794  |
| GGCTCAGCAGGGTTTCAAGC | 4695 + | TGG | 322   |
| ATCGTATTTGAAAATGATGA | 4779 + | AGG | 2     |
| TGGAAATCATATTTATACGG | 4814 - | CGG | 4     |
| TCTTGGAATCATATTTATA  | 4817 - | CGG | 9147  |
| ATTGAATTAGTTACTCGATT | 4866 + | AGG | 10361 |
| TTGGTATCAAATCTAAGCT  | 4889 - | AGG | 973   |
| AACTTACCAATAAGATCAT  | 4908 - | TGG | 67    |
| TTTGATACCAATGATCTTAT | 4917 + | TGG | 9152  |
| TATTGGTAAGTTTTGCTACT | 4934 + | TGG | 7715  |
| TTTGCTACTTGGTATTGAAA | 4945 + | TGG | 3     |
| TGGAAATTCAATGAAGATGA | 4965 + | AGG | 2564  |
| AGATGAAGGTAAGTATTTTA | 4979 + | CGG | 1     |
| ACATCATCGCCCTTTTGT   | 5003 - | AGG | 9686  |
| ATTTATTAACCTTACAAAA  | 5009 + | AGG | 1628  |
| TTTATTAACCTTACAAAAA  | 5010 + | GGG | 3048  |
| TGCTTATCTGTCTTCGGAAT | 5036 - | AGG | 1461  |



|                      |        |     |       |
|----------------------|--------|-----|-------|
| GCTTTTTGCTTATCTGTCTT | 5042 - | CGG | 466   |
| CAAAAAGCTGAAGAAAATAA | 5073 + | CGG | 179   |
| AAAAAGCTGAAGAAAATAAC | 5074 + | GGG | 1441  |
| AAAAGCTGAAGAAAATAACG | 5075 + | GGG | 89    |
| AATTGGCCACTGCTTTCAA  | 5117 - | TGG | 1416  |
| AGCAATCCATTTGAAAGCAG | 5127 + | TGG | 3213  |
| CTTGGTCGTCATATCCAAAT | 5134 - | TGG | 1102  |
| TTTGAAAGCAGTGGCCAATT | 5136 + | TGG | 570   |
| CACCTTAAAACGCTAAATCT | 5152 - | TGG | 6942  |
| AGATTTAGCGTTTTAAGGTG | 5171 + | TGG | 446   |
| AAGTACCGTCGTTATCTTTC | 5203 - | TGG | 2819  |
| AGATAACGAAAGATAACGA  | 5214 + | CGG | 5638  |
| TTCAACACCAGTAGCAACGA | 5229 - | CGG | 113   |
| ACTTATTCCGTCGTTGCTAC | 5238 + | TGG | 20037 |
| CACATTGACTTACTAGAAAA | 5280 + | CGG | 323   |
| ACCTCTACTTCTGCTTTTAG | 5291 - | TGG | 230   |
| TCCACTAAAAGCAGAAGTAG | 5306 + | AGG | 909   |
| AAAAGCAGAAGTAGAGGTTC | 5312 + | CGG | 2451  |
| ATAGATAGTTTTTTATTGTC | 5315 - | CGG | 147   |
| GTAGAGATATAGAACTTCAC | 5383 + | TGG | 3081  |
| TAGAGATATAGAACTTCACT | 5384 + | GGG | 17408 |
| AGAGATATAGAACTTCACTG | 5385 + | GGG | 545   |
| AATTTTCTAGTTGATTCTAC | 5396 - | TGG | 1297  |
| AAAATTATTACAAACAGAAT | 5429 + | TGG | 468   |
| ACTGTTCTATGAAAGTTGCA | 5488 + | AGG | 46    |
| CTGTTCTATGAAAGTTGCAA | 5489 + | GGG | 1895  |
| TTACTCGTTTCTACACTCAT | 5540 - | AGG | 166   |
| AAGATAAAGCGTTATTATAT | 5590 + | TGG | 5     |
| TTCCGCATATTACACAGTTG | 5608 - | CGG | 46    |
| AACCGCAACTGTGTAATATG | 5622 + | CGG | 123   |
| TAATGTGCCAGGTCTGCGTG | 5633 - | AGG | 17    |
| CGGAAAGCCTCACGCAGACC | 5642 + | TGG | 4910  |
| CGACTGCTTCATAATGTGCC | 5644 - | AGG | 284   |
| CTGGCACATTATGAAGCAGT | 5661 + | CGG | 1888  |
| CTAATACATGTTTGTCATAG | 5695 - | TGG | 763   |
| CACAACGAGCAACATGCGAT | 5751 + | TGG | 8348  |
| TTATCCACGAGTCATGCAAG | 5782 - | TGG | 73    |
| AATACCACTTGCATGACTCG | 5794 + | TGG | 6033  |
| CGTGGATAAAAGTTGATGAG | 5812 + | AGG | 328   |
| AGGCTCAATAAAATGTTGAA | 5832 + | AGG | 73    |
| AATGTTGAAAGGAGAGAAAA | 5843 + | AGG | 7     |
| CTCCGCCAAGATGACGATT  | 5883 - | AGG | 597   |
| AGCACTCCTAATCGTCATCT | 5893 + | TGG | 10862 |

|                      |        |     |      |
|----------------------|--------|-----|------|
| ACTCCTAATCGTCATCTTGG | 5896 + | CGG | 6879 |
| TGCTATGCATGCTGTAAAAG | 5932 + | TGG | 1744 |
| AAAAACCTGTATTAATAAA  | 5956 - | CGG | 176  |
| AATCTCCGTTTAGTTAATAC | 5967 + | AGG | 3839 |
| TTTTACAAAAGCTTTACCAT | 5991 + | AGG | 6392 |
| TCAATTAGTTTGTCCGCCTA | 5991 - | TGG | 2258 |
| TGGGTAATAGACATCAAAAA | 6015 - | AGG | 6    |
| TTTTTTGATGTCTATTACCC | 6033 + | AGG | 2353 |
| TTTTTGATGTCTATTACCCA | 6034 + | GGG | 439  |
| AAAGTTACATTACAGCCCCT | 6034 - | GGG | 258  |
| TTTTGATGTCTATTACCCAG | 6035 + | GGG | 2311 |
| TAAAGTTACATTACAGCCCC | 6035 - | TGG | 81   |
| GAAACAATAAGTAAACTTTC | 6075 - | TGG | 763  |
| AAAGTTTACTTATTGTTTCT | 6095 + | AGG | 541  |
| GTAAAAGAATGTAAAGTC   | 6108 - | AGG | 1200 |
| GAAAAACAAAGATTTGTTTC | 6141 - | GGG | 2402 |
| AGAAAAACAAAGATTTGTTT | 6142 - | CGG | 405  |
| TTAAAGTGATTTAAAAACTG | 6190 + | AGG | 101  |
| ATGTCTTACTTAACAAAAAA | 6219 - | AGG | 9    |
| TAATAACCTAGTAAGGTTAG | 6262 - | GGG | 30   |
| TTAATAACCTAGTAAGGTTA | 6263 - | GGG | 11   |
| ATTAATAACCTAGTAAGGTT | 6264 - | AGG | 869  |
| TTTCAATTAATAACCTAGTA | 6269 - | AGG | 658  |
| TTAAAACCCCTAACCTTACT | 6272 + | AGG | 8348 |
| TAGGTTATTAATTGAAATTT | 6291 + | CGG | 54   |
| TCGGTTGATTCTATATCTAA | 6310 + | CGG | 1180 |
| GAATGACGGTATGAATATAT | 6337 - | CGG | 910  |
| GTTTTAAACCCAAAGAATGA | 6351 - | CGG | 1163 |
| ATATTCATACCGTCATTCTT | 6358 + | TGG | 3900 |
| TATTCATACCGTCATTCTTT | 6359 + | GGG | 8568 |
| TCCTGCCGTTAAATATAGAG | 6373 - | CGG | 147  |
| TAAAACCGCTCTATATTTAA | 6384 + | CGG | 1539 |
| ACCGCTCTATATTTAACGGC | 6388 + | AGG | 1432 |
| TTAAAAGAATAGCATCATT  | 6436 + | TGG | 1273 |
| TTAAAAGAATAGCATCATTT | 6437 + | GGG | 1251 |
| TAAAAGAATAGCATCATTTG | 6438 + | GGG | 2623 |
| TAATTATTTCAACAAATGAA | 6470 + | TGG | 1962 |
| TTATTTCAACAAATGAATGG | 6473 + | TGG | 148  |
| TATTTCAACAAATGAATGGT | 6474 + | GGG | 468  |
| AAAATAATAGCATCATCTA  | 6502 - | TGG | 1974 |
| AACTTTGAAGCTTCTAGAGC | 6577 + | AGG | 981  |
| GAACCACAATTTTCTCTTCT | 6585 - | AGG | 1479 |
| GGACCTAGAAGAGAAAATTG | 6598 + | TGG | 22   |

|                       |        |     |      |
|-----------------------|--------|-----|------|
| GGTTCTTGTAATTATTTTC   | 6619 + | AGG | 2976 |
| TGGGAAATTCCACCTTTATG  | 6700 - | TGG | 223  |
| AAATAACTTTATCCACATAA  | 6704 + | AGG | 3047 |
| TAACTTTATCCACATAAAGG  | 6707 + | TGG | 29   |
| AAACTTGGGAACTTGTCTTT  | 6719 - | GGG | 45   |
| AAAACCTTGGGAACTTGTCTT | 6720 - | TGG | 15   |
| AGAAACATTCTCTAAAACCT  | 6733 - | GGG | 80   |
| TAGAAACATTCTCTAAAACCT | 6734 - | TGG | 567  |
| GTTTTAGAGAATGTTTCTAC  | 6754 + | AGG | 1086 |
| TTATTGAAGGCGCATCAAAA  | 6761 - | GGG | 99   |
| ATTATTGAAGGCGCATCAAA  | 6762 - | AGG | 10   |
| GGTATTGATAAAATTATTGA  | 6774 - | AGG | 2    |
| ATGGATCCTATTTTAGGTAA  | 6795 - | AGG | 44   |
| ATAATTATGGATCCTATTTT  | 6801 - | AGG | 433  |
| TCAATACCTTTACCTAAAAT  | 6805 + | AGG | 1125 |
| AGATTGGGGGTGAATAATTA  | 6814 - | TGG | 19   |
| TCGCTATTGCGTTAGATTGG  | 6827 - | GGG | 231  |
| ATCGCTATTGCGTTAGATTG  | 6828 - | GGG | 37   |
| TATCGCTATTGCGTTAGATT  | 6829 - | GGG | 2111 |
| TTATCGCTATTGCGTTAGAT  | 6830 - | TGG | 22   |
| CCATTTGCTTATCTCCTTTC  | 6863 - | TGG | 6835 |
| ATAATAAAATTATACCAGAA  | 6865 + | AGG | 663  |
| CCAGAAAGGAGATAACGAAA  | 6879 + | TGG | 637  |
| TTTAGAACGATAAAAGAAAG  | 6907 + | TGG | 67   |
| AATTTAAGTGCTAAAGCTAA  | 6970 + | AGG | 1712 |
| ATTTAAGTGCTAAAGCTAAA  | 6971 + | GGG | 2581 |
| GCCAATTGTCAGGACGACTT  | 6992 - | AGG | 219  |
| GTGTATATTTGCCAATTGTC  | 7002 - | AGG | 232  |
| TCCTAAGTCGTCCTGACAAT  | 7007 + | TGG | 1097 |
| GTAGTTAAACATATGAATGA  | 7048 + | TGG | 740  |
| GGACAAAATCAATCAATAG   | 7069 + | TGG | 6461 |
| TAGTGCGCTTCAAGAACTTA  | 7086 + | TGG | 4239 |
| ATACAAAAAAGAGCTGAAAA  | 7129 + | CGG | 852  |
| GCTGAAAACGGTGTGTTTAA  | 7141 + | AGG | 467  |
| TCCGAAAATGGCATTTCGGT  | 7173 - | TGG | 89   |
| GTTTTCCGAAAATGGCATTT  | 7177 - | CGG | 393  |
| GATAATCCGTTTTCCGAAAA  | 7185 - | TGG | 56   |
| ACCAACCGAAATGCCATTTT  | 7188 + | CGG | 1869 |
| GAAATGCCATTTTCGGAAAA  | 7195 + | CGG | 1    |
| ATTTTCGGAAAACGGATTAT  | 7203 + | CGG | 16   |
| GAAAACGGATTATCGGCAAA  | 7210 + | CGG | 9    |
| AAAACGGATTATCGGCAAAC  | 7211 + | GGG | 47   |
| GCAAACGGGTTTTTCGGAAAA | 7225 + | CGG | 2    |

|                      |        |     |       |
|----------------------|--------|-----|-------|
| GTTTTCGGAAAACGGAAAAA | 7233 + | CGG | 13    |
| TATTAGTAGTACGCCTTTT  | 7244 - | CGG | 1842  |
| GGAAAAACGGAAAACCGAAA | 7246 + | AGG | 56    |
| AATAACAATACTAATAATGA | 7312 + | TGG | 984   |
| TAATGATGGAAGTATATTGT | 7326 + | CGG | 14    |
| AATGATGGAAGTATATTGTC | 7327 + | GGG | 255   |
| TAGGGAATGGAATACACAGT | 7338 - | CGG | 266   |
| GATAATTTCTTTATAGGGAA | 7351 - | TGG | 37    |
| TATTCGATAATTTCTTTATA | 7356 - | GGG | 207   |
| GTATTCGATAATTTCTTTAT | 7357 - | AGG | 32    |
| GAATACTTAAATAAAAAAGC | 7390 + | AGG | 2     |
| AAGATTTTATTAAGCAAGA  | 7445 + | TGG | 1273  |
| CAAGATGGAATCAAGATTTT | 7460 + | AGG | 1568  |
| ATGGAATCAAGATTTTAGGT | 7464 + | TGG | 1184  |
| GAATCAAGATTTTAGGTTGG | 7467 + | AGG | 25    |
| TAGGTTGGAGGATTTTAAAA | 7479 + | AGG | 2     |
| TTGATATCAAAACAGCTGAA | 7505 + | TGG | 499   |
| AACAGCTGAATGGTTAAACA | 7515 + | CGG | 2075  |
| CAAAAAGTGTTCGGTCTA   | 7535 - | AGG | 36    |
| TTACTGCCAAAAGTGTTTC  | 7542 - | TGG | 96    |
| CTTAGACCAGAAACACTTTT | 7552 + | TGG | 7091  |
| ACTTTTTGGCAGTAAATTTG | 7566 + | AGG | 382   |
| CTTTTTGGCAGTAAATTTGA | 7567 + | GGG | 297   |
| TTTTTGGCAGTAAATTTGAG | 7568 + | GGG | 72    |
| TCCAATTGATCCGTGCCAGT | 7596 - | TGG | 7773  |
| AATCAAAAAATACAACCAAC | 7597 + | TGG | 980   |
| AAAAATACAACCAACTGGCA | 7602 + | CGG | 807   |
| ACCAACTGGCACGGATCAAT | 7611 + | TGG | 14919 |
| TGAAGTACGACGAAAGTTAT | 7640 + | TGG | 1437  |
| GAAGTACGACGAAAGTTATT | 7641 + | GGG | 1155  |
| CGACGAAAGTTATTGGGATT | 7647 + | AGG | 510   |
| GACGAAAGTTATTGGGATTA | 7648 + | GGG | 139   |
| ACGAAAGTTATTGGGATTAG | 7649 + | GGG | 26    |
| CGAAAGTTATTGGGATTAGG | 7650 + | GGG | 169   |
| TTTATCTTTTCGCTGAATAG | 7668 - | TGG | 1063  |
| AATCCTTTTTCGACATGAGT | 7713 - | AGG | 2100  |
| CAACCTACTCATGTCGAAAA | 7726 + | AGG | 948   |
| GGATTGAAATGTGAGAGATG | 7747 + | TGG | 780   |
| CCATTCGGGTGTTTTTAGT  | 7782 - | AGG | 2050  |
| CTTTATACTCGTAACCATT  | 7796 - | GGG | 3900  |
| TCTTTATACTCGTAACCATT | 7797 - | CGG | 4095  |
| AATGGTTACGAGTATAAAGA | 7816 + | CGG | 18    |
| TTGCAAATGTGAAATCTATG | 7839 + | AGG | 1866  |

|                       |        |     |      |
|-----------------------|--------|-----|------|
| ACTGTTGCATCTCTTAAAGA  | 7905 - | CGG | 456  |
| TGTACTTGTTTTTCATTTTG  | 7941 - | TGG | 5297 |
| ACAGCAATAGAGTACGTACA  | 7990 + | AGG | 114  |
| CCTTGCAATATTAATGATTT  | 8013 - | TGG | 48   |
| CCAAAATCATTAATATTGCA  | 8029 + | AGG | 1443 |
| TTAATATTGCAAGGTTTCATA | 8038 + | CGG | 4224 |
| TTGCAAGGTTTCATACGGAAC | 8044 + | TGG | 23   |
| TTGCGATAGCGTATGCTAGG  | 8057 - | TGG | 53   |
| CTTTTGCGATAGCGTATGCT  | 8060 - | AGG | 545  |
| GCAAAAGCAGTCAAAGCTAA  | 8092 + | AGG | 300  |
| CAAAGCAGTCAAAGCTAAA   | 8093 + | GGG | 3154 |
| AGTCAAAGCTAAAGGGCATA  | 8100 + | CGG | 745  |
| TTGATACGATCCATCAACAT  | 8124 - | TGG | 6695 |
| TATGCACATACCAATGTTGA  | 8130 + | TGG | 965  |
| TTTACTTGTACTAGATGATA  | 8229 + | TGG | 1581 |
| TTACTTGTACTAGATGATAT  | 8230 + | GGG | 373  |
| AGCATTGTTGATAACAGAGT  | 8290 + | AGG | 3433 |
| AACTAAATCAAATATGAAC   | 8351 + | TGG | 1228 |
| GCGAGAAAAGTAAGAGTAAT  | 8404 + | CGG | 964  |
| GAGTAATCGGAGACGATTTTC | 8417 + | AGG | 386  |
| AGTAATCGGAGACGATTTCA  | 8418 + | GGG | 716  |
| ATTTAGGGAGCGAGATGCA   | 8432 + | TGG | 535  |
| TTTAGTTTTTAAAAATTCTT  | 8442 - | TGG | 3634 |
| CGCTCAGAACTCATAGATG   | 8501 + | AGG | 430  |
| GAAACTCATAGATGAGGCAC  | 8507 + | AGG | 142  |
| AGGCACAGGGCGATGAAAAT  | 8521 + | AGG | 159  |
| CTGCAAGTTTTTGGATAAAT  | 8536 - | AGG | 14   |
| CTTAATATTCGACGATAGCG  | 8572 - | GGG | 1377 |
| TCCTTAATATTCGACGATAG  | 8574 - | CGG | 66   |
| CCCGCTATCGTCGAATATTA  | 8589 + | AGG | 45   |
| TATAAGTAATATTTTTCTTT  | 8609 - | CGG | 1979 |
| TATCTTCCGTGCCATCTTCT  | 8632 - | CGG | 3796 |
| TATTAATTATACCGAGAAGA  | 8637 + | TGG | 704  |
| AGATGGCACGGAAGATATTA  | 8654 + | AGG | 171  |
| AATGAAGTTTATTCGCTCAC  | 8700 + | AGG | 4333 |
| TTTCTTTTCGTGCTGAAAT   | 8709 - | GGG | 17   |
| TTTTCTTTTCGTGCTGAAA   | 8710 - | TGG | 2    |
| CAGCGACGAAAAGAAAATCA  | 8732 + | TGG | 168  |
| GAGCGCCTTTGAATCGTTTT  | 8749 - | AGG | 2    |
| AGTGACCTAAAACGATTCAA  | 8760 + | AGG | 8    |
| AAACGATTCAAAGGCGCTCA  | 8769 + | CGG | 4    |
| AACGATTCAAAGGCGCTCAC  | 8770 + | GGG | 313  |
| CTTTTATATGAGCAAGAGCT  | 8793 + | AGG | 1076 |

|                       |        |     |       |
|-----------------------|--------|-----|-------|
| TTTTATATGAGCAAGAGCTA  | 8794 + | GGG | 1735  |
| CAACGATATTTGATATTTAG  | 8824 + | AGG | 1234  |
| CGATATTTGATATTTAGAGG  | 8827 + | TGG | 196   |
| TGATATTTAGAGGTGGCACA  | 8834 + | TGG | 1020  |
| TAAATTTAACGAAACGTTCG  | 8867 + | AGG | 1993  |
| CGAAACGTTGAGGCACCTA   | 8876 + | TGG | 1038  |
| CGTGGACGAGGCGAGCCCAT  | 8876 - | AGG | 278   |
| GAAACGTTGAGGCACCTAT   | 8877 + | GGG | 1651  |
| GTATTACGAAAGCGTGGACG  | 8888 - | AGG | 158   |
| CTACCTGTATTACGAAAGCG  | 8894 - | TGG | 53    |
| CGTCCACGCTTTCGTAATAC  | 8907 + | AGG | 984   |
| TTATGATTTGTATAAGCTGT  | 8936 - | TGG | 261   |
| AATCATAAAGCGTATATACA  | 8967 + | AGG | 145   |
| GCGCGCTCTAGATTTAACTT  | 8981 - | AGG | 470   |
| TTCGACCATGATTTAAGTAA  | 9032 - | TGG | 811   |
| ACTTTCATTACTTAAATCA   | 9043 + | TGG | 16235 |
| GAAGAAAAAGAAAAGTGAAA  | 9068 + | TGG | 1097  |
| AAAAAGAAAAGTGAAATGGT  | 9072 + | TGG | 1211  |
| TTAATTAAGTTATCGATATC  | 9098 - | CGG | 86    |
| ACAGTATTAGACGCATGTAA  | 9138 + | TGG | 715   |
| ACGCATGTAATGGTCATGTG  | 9148 + | TGG | 294   |
| AGCTAGTTATTTCTGTAATT  | 9166 - | TGG | 1824  |
| ATAACTAGCTCAAAGCGTTA  | 9195 + | TGG | 969   |
| TCAACTCGCATGATTATTTT  | 9209 - | TGG | 84    |
| AAAAATAATCATGCGAGTTG  | 9227 + | AGG | 4306  |
| TAAACGCAACGATTGATATA  | 9279 + | AGG | 4     |
| TACTGATATTTCAACTTCTGT | 9289 - | AGG | 8804  |
| ATATCAGTATTTTGATGATG  | 9319 + | TGG | 51    |
| GGATATCGAAAAAGAAGCGC  | 9340 + | TGG | 6677  |
| TCATACTCTAGTAATTCGTC  | 9367 - | TGG | 996   |
| AATTAGAAATGTAAATGTAG  | 9415 + | AGG | 750   |
| TAGAAATGTAAATGTAGAGG  | 9418 + | TGG | 283   |
| ATGAGTGTTCGTGAAGATTAA | 9446 + | CGG | 244   |
| TCATGTTTCGGTAAATTTATA | 9457 - | TGG | 1035  |
| TATCAATTCATTTTCATGTT  | 9470 - | CGG | 197   |
| AATGAATTGATAAAAAAGAA  | 9497 + | CGG | 131   |
| ATGAATTGATAAAAAAGAAC  | 9498 + | GGG | 1174  |
| AAAAAGAACGGGTTAACTCC  | 9509 + | TGG | 286   |
| ACTCTTTTTGCAACCATTC   | 9511 - | AGG | 677   |
| GAACGGGTTAACTCCTGGAA  | 9514 + | TGG | 158   |
| ATGGTTGCAAAAAGAGTACG  | 9533 + | TGG | 51    |
| GTTGCAAAAAGAGTACGTGG  | 9536 + | TGG | 40    |
| AAAAAGAGTACGTGGTGGCT  | 9541 + | GGG | 301   |

|                       |         |     |      |
|-----------------------|---------|-----|------|
| CATGCCATAAGGTGCGTTTA  | 9560 -  | AGG | 24   |
| TCAGCTAAGCGCATGCCATA  | 9571 -  | AGG | 1984 |
| GAAGCCTTAAACGCACCTTA  | 9572 +  | TGG | 286  |
| GCTCTCTCGTTGCATAATTC  | 9614 -  | TGG | 308  |
| GCAAAGAACGTGAAATAGCT  | 9651 +  | AGG | 2836 |
| AGCTAGGCAACGACGTAAAG  | 9667 +  | AGG | 764  |
| AAGAGGTTGAACTACGTAAAG | 9684 +  | AGG | 895  |
| TGTGGTACATTAACAAATG   | 9694 -  | TGG | 406  |
| GGATCACGTGAATGTTTTTG  | 9712 -  | TGG | 4    |
| TAAGTGACATCGAACCAGTA  | 9733 -  | CGG | 293  |
| AACATTCACGTGATCCGTAC  | 9735 +  | TGG | 839  |
| CACTCCATTTCTTGAACATT  | 9759 -  | TGG | 1011 |
| ATAACCAAATGTTCAAGAAA  | 9771 +  | TGG | 313  |
| TCGCCGTATGTGTAATGTGC  | 9849 -  | TGG | 618  |
| CAACCAGCACATTACACATA  | 9862 +  | CGG | 8028 |
| AGATTTTATTGAACAAGTAA  | 9900 +  | CGG | 1718 |
| ATTGCAAATGCTAATTGTGG  | 9915 -  | TGG | 389  |
| CCTATTGCAAATGCTAATTG  | 9918 -  | TGG | 390  |
| CCACAATTAGCATTGCAAT   | 9934 +  | AGG | 4208 |
| TCCTCATGACCATTCTTTAA  | 9969 -  | CGG | 1425 |
| TCTAGAGCACCGTTAAAGAA  | 9976 +  | TGG | 760  |
| ACCGTTAAGAATGGTCATG   | 9984 +  | AGG | 130  |
| AAAGAATGGTCATGAGGATA  | 9990 +  | TGG | 106  |
| TAGATAGAGTGTTTGACTTG  | 10031 + | TGG | 625  |
| AGATAGAGTGTTTGACTTGT  | 10032 + | GGG | 507  |
| TTTACGCGCGTTATCTGTCA  | 10047 - | TGG | 2041 |
| ATCTCTTAGAGCCGAAAAAT  | 10081 - | TGG | 216  |
| GAATACTTAAACCAATTTTT  | 10086 + | CGG | 319  |
| CTCTAAGAGATATCTGTATC  | 10109 + | AGG | 897  |
| AATAAGCGCCATTCACTACA  | 10138 - | TGG | 2484 |
| GCACATATCCATGTAGTGAA  | 10146 + | TGG | 255  |
| AATGGCGCTTATTACTTTCA  | 10164 + | CGG | 27   |
| ATGGCGCTTATTACTTTTAC  | 10165 + | GGG | 105  |
| CATATCGTACCAGATTGGCA  | 10188 + | AGG | 1996 |
| GAAAAAGACATTTGATACAG  | 10214 + | CGG | 6    |
| TTTGATACAGCGGAAGAGCT  | 10224 + | CGG | 332  |
| GGAATATATATAAAGCAACA  | 10245 + | TGG | 475  |
| ATATATAAAGCAACATGGTT  | 10250 + | TGG | 1199 |
| GCAACATGGTTTGAATACG   | 10259 + | AGG | 176  |
| AGCAACTAACTTTATTTTAG  | 10288 + | AGG | 399  |
| TAACCTTATTTTAGAGGAGA  | 10294 + | TGG | 37   |
| TATTAGACGAGTTAATTTAA  | 10350 + | TGG | 178  |
| ATTAGACGAGTTAATTTAAAT | 10351 + | GGG | 7132 |

|                        |         |     |      |
|------------------------|---------|-----|------|
| TAAATGGGCGCGAGAAAATC   | 10366 + | CGG | 28   |
| ATTTTCCCTTGTGATAGCTC   | 10369 - | CGG | 751  |
| GAAAATCCGGAGCTATCACA   | 10379 + | AGG | 340  |
| AAAATCCGGAGCTATCACAA   | 10380 + | GGG | 1071 |
| GGGAAAATATTTTTTTCAAC   | 10400 + | AGG | 2    |
| TTTTCAACAGGATTTAGTGA   | 10412 + | TGG | 283  |
| GTCGAACACTTATTTGTATT   | 10435 - | TGG | 889  |
| ACTATGAAGGGGATATCAAT   | 10471 - | TGG | 1481 |
| TTTCAATATCAACTATGAAG   | 10482 - | GGG | 25   |
| TTTCAATATCAACTATGAA    | 10483 - | GGG | 71   |
| TTTTTCAATATCAACTATGA   | 10484 - | AGG | 129  |
| CTTATCAAATACCGTGTCTT   | 10514 - | TGG | 1421 |
| AAAAGAAGTAACCAAAGACA   | 10519 + | CGG | 493  |
| GTTGTTTGAAATGTACGAGA   | 10552 + | TGG | 209  |
| TTTGAAATGTACGAGATGGA   | 10556 + | AGG | 353  |
| GAAATGTACGAGATGGAAGG   | 10559 + | AGG | 91   |
| ACTAGTGTTCATATAATA     | 10577 - | CGG | 169  |
| AGTATAAAAGAATGTTTATA   | 10613 + | TGG | 2789 |
| AAGATATAGAATGCTTTGGT   | 10630 - | AGG | 1213 |
| GTTTAAGATATAGAATGCTT   | 10634 - | TGG | 4653 |
| ATATGACGATGACGTTAATC   | 10677 + | TGG | 480  |
| ATGACGTTAATCTGGAAAGA   | 10685 + | TGG | 1    |
| TGACGTTAATCTGGAAAGAT   | 10686 + | GGG | 234  |
| GACGTTAATCTGGAAAGATG   | 10687 + | GGG | 372  |
| AATCTGGAAAGATGGGGAGT   | 10693 + | TGG | 58   |
| GATACAAAGACTTACTTTAT   | 10714 - | AGG | 2088 |
| TTTTGTGCAAAGTACGAATG   | 10797 + | AGG | 29   |
| CAGTTTTAATACCGTATTCG   | 10810 - | TGG | 2306 |
| TGAGGAAGAAGCCACGAATA   | 10815 + | CGG | 344  |
| CTATGCTTGACGTTTGGAAC   | 10847 - | GGG | 648  |
| TCTATGCTTGACGTTTGGA    | 10848 - | CGG | 38   |
| CGACCTCTATGCTTGACGTT   | 10853 - | TGG | 350  |
| GTTCCAAACTGCAAGCATAG   | 10866 + | AGG | 1785 |
| AAGCATAGAGGTCGAAAAAG   | 10878 + | TGG | 4    |
| CATAGAGGTCGAAAAAGTGG   | 10881 + | AGG | 503  |
| TCGTCCCACTCGATATTT     | 10901 - | CGG | 196  |
| TGATGCCGAAATATCGAGTG   | 10912 + | TGG | 376  |
| CGAGTGTGGGACGAATATAC   | 10926 + | AGG | 1076 |
| GGAAGAATACACGATGTTGT   | 10947 + | AGG | 9865 |
| AGTTCACTATGAAAACACTACG | 10991 + | CGG | 2347 |
| GTAGAACTTATGCAAAGTAC   | 11052 + | AGG | 118  |
| AAACAACAACGAAATATATG   | 11087 + | CGG | 319  |
| AACAACAACGAAATATATGC   | 11088 + | GGG | 1793 |



|                      |         |     |      |
|----------------------|---------|-----|------|
| CCTATTACAGATTCATCGTC | 11132 - | TGG | 9699 |
| ATATCTATTGATGTTGTAAA | 11190 + | TGG | 1357 |
| ATAAAAGATTTTATGTTTG  | 11219 + | AGG | 661  |
| TAAAAGATTTTATGTTTGA  | 11220 + | GGG | 348  |
| ATACTCAAAGTAATCATTTT | 11235 - | CGG | 44   |
| TAACTCACAGTCATATCTA  | 11275 - | AGG | 313  |
| CTTCCTTAGATATGACTGTG | 11288 + | AGG | 194  |
| AGATATGACTGTGAGGTTAA | 11295 + | AGG | 214  |
| ATTTGAATCATCACATTTAT | 11324 + | TGG | 1306 |
| TGAATCATCACATTTATTGG | 11327 + | AGG | 47   |
| AACAGAATGAACTATGAAAC | 11351 + | AGG | 371  |
| ACAGAATGAACTATGAAACA | 11352 + | GGG | 249  |
| CAGAATGAACTATGAAACAG | 11353 + | GGG | 580  |
| TAGCGTCCATTACACCTAGT | 11361 - | TGG | 748  |
| TATGAAACAGGGGTCCAAC  | 11363 + | AGG | 283  |
| AGGGGTCCAACAGGTGTAA  | 11371 + | TGG | 39   |
| AACTAGGTGTAATGGACGCT | 11379 + | AGG | 381  |
| AAGCAACGTGATGAGCTTAT | 11438 + | TGG | 673  |
| AGCAACGTGATGAGCTTATT | 11439 + | GGG | 209  |
| GCAACGTGATGAGCTTATTG | 11440 + | GGG | 711  |
| GATGAGCTTATTGGGGATAT | 11447 + | AGG | 46   |
| AAGAGAACGCAACAAAGAGC | 11476 + | TGG | 1824 |
| TGGAGAAGAAAGCAAGTGCA | 11496 + | TGG | 322  |
| GGAGAAGAAAGCAAGTGCAT | 11497 + | GGG | 287  |
| AAAGATTTAATAAACGAATT | 11543 + | TGG | 40   |
| ATAAACGAATTTGGCAAAGA | 11552 + | TGG | 36   |
| GATGGTGAAGAGTTAAATT  | 11570 + | TGG | 254  |
| TGAAAGAGTTAAATTTGGAA | 11575 + | TGG | 606  |
| ATTAACAATAAAACTTTTA  | 11599 + | TGG | 2049 |
| AAACAATAAAACTTTTATGG | 11602 + | AGG | 1929 |
| CGGATTGTTCTATTTGTTCA | 11626 - | CGG | 589  |
| ATACGCACTAGCACTTATAA | 11646 - | CGG | 127  |
| ATAAGTGCTAGTGCGTATAA | 11667 + | CGG | 59   |
| GTATAACGGCAATGACACAG | 11681 + | AGG | 689  |
| TATAACGGCAATGACACAGA | 11682 + | GGG | 669  |
| GGGATTACTAAAAGAGATTG | 11702 + | AGG | 14   |
| AGCGTTTGATGAAATACTTG | 11744 + | AGG | 236  |
| GCGTTTGATGAAATACTTGA | 11745 + | GGG | 2150 |
| ATTCAACATTCAGTTAAAGA | 11781 + | AGG | 4154 |
| ATTGAACTTGATGAAGCAGT | 11805 + | AGG | 4    |
| TTGAACTTGATGAAGCAGTA | 11806 + | GGG | 65   |
| TGAAGCAGTAGGGATTATGA | 11816 + | CGG | 36   |
| GAAGCAGTAGGGATTATGAC | 11817 + | GGG | 1    |

|                         |         |     |      |
|-------------------------|---------|-----|------|
| TCAAGTTGTCTATAAATATG    | 11840 + | AGG | 36   |
| AGTTGTCTATAAATATGAGG    | 11843 + | AGG | 468  |
| CTATAAATATGAGGAGGCAC    | 11849 + | AGG | 92   |
| AGAGTTATTACAAATACAAA    | 11907 + | AGG | 94   |
| CTATCTCGTAAGTTCAGCGT    | 11931 - | TGG | 1028 |
| ATGTAGTTGAATTCTTTGAA    | 11981 + | TGG | 55   |
| CTTTGAATGGTTTAATACAT    | 11994 + | TGG | 3679 |
| CATTGGAAACGTTTAAGAAC    | 12011 + | TGG | 3959 |
| AAGAACTGGAAGAAGAAACC    | 12025 + | AGG | 513  |
| TGTACGTCTAACGGCTTACC    | 12027 - | TGG | 1105 |
| TCATCAAGTTGTACGTCTAA    | 12036 - | CGG | 211  |
| TGATGAATTAGCTGACATGT    | 12069 + | TGG | 840  |
| TTAGCTGACATGTTGGCGTT    | 12076 + | TGG | 33   |
| TTGAGTATTGCGAATCAAGT    | 12100 + | AGG | 867  |
| AATTCTTTGAATATTATCTG    | 12222 - | TGG | 651  |
| ATAACAATTGCTTGTTGGTC    | 12249 - | GGG | 104  |
| TCACTATAACAATTGCTTGT    | 12254 - | TGG | 6540 |
| TTTTGTATGCGTCAATGAGT    | 12308 - | TGG | 2499 |
| CATACAAAAAGAAAATGAAA    | 12338 + | AGG | 4    |
| AGGAATCATGAAAGACAAGA    | 12358 + | TGG | 2235 |
| CAAGATGGAACAGCAGACGC    | 12373 + | AGG | 1068 |
| GGAACAGCAGACGCAGGAAA    | 12379 + | AGG | 63   |
| AGACATATTAGATCGAGTCA    | 12412 + | AGG | 20   |
| CATATTAGATCGAGTCAAGG    | 12415 + | AGG | 8304 |
| AGATCGAGTCAAGGAGGTTT    | 12421 + | TGG | 170  |
| GATCGAGTCAAGGAGGTTTT    | 12422 + | GGG | 3    |
| ACAACATTCAAAGATTCAAC    | 12466 + | AGG | 521  |
| CTAAAGCTAAGAGTAATCAA    | 12509 + | AGG | 6    |
| TCAAAGGTTTACAGTCGTTG    | 12525 + | AGG | 818  |
| AGAAGCGAAAGAGAAGTACG    | 12561 + | AGG | 321  |
| GTCAGTTGTATGAAAATATA    | 12617 + | AGG | 8    |
| TCAGTTGTATGAAAATATAA    | 12618 + | GGG | 91   |
| ATGAAAATATAAGGGAGTGT    | 12626 + | GGG | 433  |
| GTTAAAATTA AAACTATTTT   | 12660 + | AGG | 2481 |
| AAAATTA AAACTATTTT CAGG | 12663 + | TGG | 13   |
| CTTCAACATATTTTTTCAA     | 12695 - | AGG | 1    |
| GAAAGAATGACGAGTTTTAA    | 12729 + | TGG | 7    |
| GTATCTGTTTTAATATACGT    | 12767 - | TGG | 552  |
| TGAATCAATCACACTTATTG    | 12809 + | AGG | 3455 |
| ATCACACTTATTGAGGAGCA    | 12816 + | TGG | 36   |
| TCACACTTATTGAGGAGCAT    | 12817 + | GGG | 61   |
| CTGAGAATTTTATTACATGA    | 12851 + | CGG | 1259 |
| TTAACGATAGAAAAAGATTA    | 12956 + | TGG | 117  |

|                       |         |     |      |
|-----------------------|---------|-----|------|
| AGAGAACTTGATTGAACAA   | 12980 + | AGG | 37   |
| TTGAACAAAGGTTATATAGT  | 12992 + | TGG | 145  |
| TGAACAAAGGTTATATAGTT  | 12993 + | GGG | 1109 |
| TATAGTTGGGATCAATGTTG  | 13006 + | AGG | 1283 |
| AGTTGGGATCAATGTTGAGG  | 13009 + | AGG | 158  |
| TTTTTCGGGAATTTCATTTT  | 13034 - | AGG | 360  |
| TTATTTTCAGTGTACTTTTT  | 13048 - | GGG | 671  |
| ATTATTTTCAGTGTACTTTTT | 13049 - | CGG | 75   |
| TCAATCTTAGCTTTTTCTTC  | 13094 - | AGG | 451  |
| TCATTCATATTAGCCATCAT  | 13166 - | AGG | 342  |
| TGAATTTTACAGTCCTATGA  | 13169 + | TGG | 3715 |
| ATATGAATGAACATGAATTA  | 13195 + | AGG | 299  |
| TATGAATGAACATGAATTA   | 13196 + | GGG | 549  |
| TCTCCAGTATCAATTAAC    | 13220 - | AGG | 114  |
| ATGCCTAGTTAATTGATAC   | 13233 + | TGG | 677  |
| AGTTTAATTGATACTGGAGA  | 13239 + | TGG | 439  |
| GATTAAAAACTTAAAAATA   | 13269 + | TGG | 136  |
| AAAACTTAAAAATATGGAT   | 13274 + | TGG | 142  |
| GCTGGAATACTGCGATTATT  | 13312 + | CGG | 237  |
| TAAGTAGCCACTGTGTATAT  | 13350 - | AGG | 133  |
| CATATCGCCTATATACACAG  | 13359 + | TGG | 97   |
| CTTGATGTACTTCTTTGTGT  | 13373 - | TGG | 3498 |
| CAACACAAAGAAGTACATCA  | 13390 + | AGG | 48   |
| AACACAAAGAAGTACATCAA  | 13391 + | GGG | 76   |
| ATAGCGCAGACATACAAGCT  | 13526 + | AGG | 398  |
| ATACAAGCTAGGTTAAAAGT  | 13537 + | AGG | 73   |
| AAAGTAAAAGTTAAGACGAT  | 13564 + | TGG | 159  |
| TTCTTTACTTCGTATAAGAT  | 13599 - | CGG | 185  |
| GATCTTATACGAAGTAAAGA  | 13617 + | AGG | 668  |
| GCAAGTATATATTATGATGA  | 13718 + | CGG | 70   |
| GACGGCTAATGATGATGTAG  | 13736 + | AGG | 130  |
| CTCAACTTTGCGAAGTCACT  | 13745 - | CGG | 4823 |
| GCGATCAGTCTGATTTGATG  | 13783 + | AGG | 255  |
| CGATCAGTCTGATTTGATGA  | 13784 + | GGG | 390  |
| TCAGTCTGATTTGATGAGGG  | 13787 + | CGG | 13   |
| GTCTGATTTGATGAGGGCGG  | 13790 + | AGG | 21   |
| GAGTCAATTGTTAATATGAT  | 13836 + | AGG | 231  |
| TGTATTAGCTGATGTAATAC  | 13880 + | CGG | 280  |
| ATTGAATTGCTATCATATTC  | 13883 - | CGG | 766  |
| AGCAATTCAATTGCACAGTA  | 13911 + | TGG | 1022 |
| GAGTTTTCCCCTTGTTGGTTT | 13934 - | CGG | 359  |
| TACTTGAGTTTTCCCCTTG   | 13940 - | TGG | 23   |
| GCAACGTTGCCGAAACCACA  | 13941 + | AGG | 940  |

|                       |         |     |      |
|-----------------------|---------|-----|------|
| CAACGTTGCCGAAACCACAA  | 13942 + | GGG | 337  |
| AACGTTGCCGAAACCACAAG  | 13943 + | GGG | 230  |
| AAGTTGAAGATGTTGTTGTG  | 13978 + | AGG | 408  |
| GGCTTGAGAGAGCAAATAAA  | 13999 + | AGG | 64   |
| GTATGCTCAGATGTTAAAAG  | 14021 + | AGG | 1629 |
| AAATCAATCGCAACAGAGAT  | 14054 + | TGG | 22   |
| AATCAATCGCAACAGAGATT  | 14055 + | GGG | 520  |
| TTCTTAGAGTTATTGAAGAA  | 14094 + | AGG | 49   |
| TATTGAAGAAAGGTTATAAC  | 14104 + | AGG | 549  |
| ATTGAAGAAAGGTTATAACA  | 14105 + | GGG | 145  |
| TTTCTGTTCAATTTAGAGTT  | 14132 - | AGG | 342  |
| TCTTTTCTGCTAATTCATCA  | 14170 - | CGG | 4195 |
| GTAAGAATTATCTTAAGACG  | 14303 + | TGG | 16   |
| TAAGAATTATCTTAAGACGT  | 14304 + | GGG | 80   |
| AAGAATTATCTTAAGACGTG  | 14305 + | GGG | 611  |
| ATCGATGAGAACATCTAATG  | 14318 - | TGG | 10   |
| AAACTACCCACCATATAGGC  | 14399 - | AGG | 51   |
| AATTAACCTACCCACCATAT  | 14403 - | AGG | 469  |
| TCACTTACTACCTGCCTATA  | 14405 + | TGG | 87   |
| CTTACTACCTGCCTATATGG  | 14408 + | TGG | 140  |
| TTACTACCTGCCTATATGGT  | 14409 + | GGG | 62   |
| CGTTCAATAAATGTGAAAGG  | 14452 - | AGG | 138  |
| CTACGTTCAATAAATGTGAA  | 14455 - | AGG | 40   |
| AATGCCCTACATCTTGTGC   | 14480 - | AGG | 235  |
| GTAGCTCCTGCACAAGATGT  | 14490 + | AGG | 240  |
| TAGCTCCTGCACAAGATGTA  | 14491 + | GGG | 55   |
| AGCTCCTGCACAAGATGTAG  | 14492 + | GGG | 211  |
| AGCACAAACTTTTCTTGCTT  | 14575 - | CGG | 432  |
| AAGCAAGAAAAGTTTGTGCT  | 14594 + | AGG | 731  |
| TTTGTGCTAGGACTCATAGA  | 14606 + | GGG | 96   |
| CGTCAATATATGCTTTCCGT  | 14619 - | TGG | 4886 |
| TCATAGAGGGCAAGAGCCAA  | 14619 + | CGG | 384  |
| CGGAAAGCATATATTGACGC  | 14639 + | AGG | 135  |
| GGAAAGCATATATTGACGCA  | 14640 + | GGG | 48   |
| GACGCAGGGTATTCGACTAA  | 14654 + | AGG | 207  |
| TATTCGACTAAAGGTAAGAG  | 14663 + | TGG | 112  |
| ATTCGACTAAAGGTAAGAGT  | 14664 + | GGG | 293  |
| TTCGACTAAAGGTAAGAGTG  | 14665 + | GGG | 17   |
| CGAGTACACTTTTTAAAAAT  | 14706 + | CGG | 4    |
| TACACTTTTTAAAAATCGGA  | 14710 + | AGG | 7    |
| ACGCAATTTTTTCGTACCTTC | 14720 - | CGG | 986  |
| AAAATCGGAAGGTTTCCGGA  | 14721 + | AGG | 67   |
| AAGTAGCTGAACAATCAAAA  | 14763 + | TGG | 182  |

|                      |         |     |      |
|----------------------|---------|-----|------|
| CATATTCTTCAAAGGCCTTT | 14775 - | TGG | 2686 |
| ATCAAAATGGACACGCCAAA | 14776 + | AGG | 328  |
| TAGCCACTCATATTCTTCAA | 14783 - | AGG | 4    |
| AGGCCTTTGAAGAATATGAG | 14796 + | TGG | 84   |
| TAAGAATGACATTGAAATAG | 14833 + | AGG | 306  |
| AAGAATGACATTGAAATAGA | 14834 + | GGG | 178  |
| TCATACCATCTAAACTAGCG | 14868 - | AGG | 873  |
| GCATTCTCGCTAGTTTAGA  | 14879 + | TGG | 179  |
| GGTATGAATAGAATGACGTT | 14900 + | AGG | 2424 |
| AAGATTGAACAAATAGATAA | 14978 + | AGG | 1281 |
| CAAATAGATAAAGGTGACAG | 14987 + | TGG | 472  |
| ACAACCTCACGACGCAATAA | 15028 + | CGG | 726  |
| TAAACTTAAATCTTTATATA | 15068 + | CGG | 5    |
| AGCAAACGCAAAAACAAGAT | 15112 + | TGG | 772  |
| TGGTTTATGTTAATTAATCA | 15132 + | CGG | 443  |
| AATCACGGAGCAAAGCGTAC | 15147 + | AGG | 2815 |
| CGAAAGATAGCAGACGAAGA | 15219 + | AGG | 648  |
| GCACCAGCAAGTATATATTG | 15236 - | AGG | 104  |
| ACACCTCAATATATACTTGC | 15249 + | TGG | 8625 |
| ATACTTGCTGGTGCAACATT | 15261 + | AGG | 7    |
| ATAGAGTTAACTAACAAATA | 15306 + | TGG | 149  |
| TATAATTCATTCATGTTATT | 15351 + | TGG | 4405 |
| CATGTTATTTGGCGTTCAAG | 15362 + | TGG | 55   |
| GGCGTTCAAGTGGTTCAGAC | 15372 + | AGG | 237  |
| ACAGGTCACAGTAAAGTAAG | 15390 + | TGG | 23   |
| AGTGGTATAGGAGCTATACG | 15408 + | TGG | 103  |
| ATACGTGGTATGACATCGTT | 15423 + | TGG | 61   |
| AGCGTCGTTAGCGCATGAAG | 15461 + | AGG | 30   |
| GAGATTAAGTCACGTTGTAG | 15492 + | TGG | 120  |
| AAGTCACGTTGTAGTGGAAC | 15498 + | TGG | 193  |
| TGGAACGGTGCAAGAATAT  | 15512 + | TGG | 918  |
| ATGCTCGGGATGGTCAGGGT | 15525 - | TGG | 260  |
| ACCAATGCTCGGGATGGTCA | 15529 - | GGG | 121  |
| AACCAATGCTCGGGATGGTC | 15530 - | AGG | 297  |
| TCAACAACCAATGCTCGGGA | 15535 - | TGG | 112  |
| TCTTTCAACAACCAATGCTC | 15539 - | GGG | 1018 |
| ATCTTTCAACAACCAATGCT | 15540 - | CGG | 789  |
| ACCCTGACCATCCCGAGCAT | 15544 + | TGG | 76   |
| GAAAATACAGATCCTAAAGC | 15585 + | AGG | 1052 |
| TATTGTCATCGAGCTTAAAT | 15604 - | TGG | 1514 |
| TAGATATAAAGAGTCTATTA | 15656 + | AGG | 337  |
| CGTTCATAGAACATACCTGA | 15671 - | TGG | 1491 |
| ATTAAGGCTTCAACACCATC | 15672 + | AGG | 667  |

|                       |         |     |       |
|-----------------------|---------|-----|-------|
| TTCTATGAACGTAATATCAA  | 15699 + | CGG | 93    |
| AACGTAATATCAACGGTATG  | 15706 + | TGG | 41    |
| ACGTAATATCAACGGTATGT  | 15707 + | GGG | 936   |
| ATCAACGGTATGTGGGTGTC  | 15714 + | TGG | 80    |
| GGTATGTGGGTGTCTGGTGA  | 15720 + | CGG | 77    |
| ATTCTCATTCAAATCAAAGT  | 15738 - | CGG | 3063  |
| TACGATTAAGCAGATGAAC   | 15776 + | TGG | 377   |
| CCAGCAAAGTATTCTTTGAT  | 15791 - | AGG | 179   |
| CCTATCAAAGAATACTTTGC  | 15807 + | TGG | 396   |
| AATACTTTGCTGGTGTGCGAC | 15817 + | TGG | 262   |
| ATACTTTGCTGGTGTGCGACT | 15818 + | GGG | 58    |
| TACTTTGCTGGTGTGCGACTG | 15819 + | GGG | 67    |
| GACTGGGGTTACGAGCACTA  | 15834 + | TGG | 39    |
| TATGGATCTATTGTGTTAAT  | 15852 + | AGG | 4     |
| TCTATTGTGTTAATAGGACG  | 15858 + | AGG | 129   |
| TTAATAGGACGAGGTATAGA  | 15867 + | TGG | 301   |
| TGGTAACTTTTATTTTATTG  | 15887 + | AGG | 63    |
| AATCATCAATAAACTTAAAT  | 15904 - | TGG | 1503  |
| AATTTAAGTTTATTGATGAT  | 15922 + | TGG | 579   |
| ATTTAAGTTTATTGATGATT  | 15923 + | GGG | 365   |
| TAAGTTTATTGATGATTGGG  | 15926 + | TGG | 40    |
| AAAGATATTGTAAGTAGATA  | 15957 + | TGG | 45    |
| CGCTGATAAAAGTAACTAT   | 16058 + | CGG | 1950  |
| GCTGATAAAAGTAACTATC   | 16059 + | GGG | 26    |
| AAGTAACTATCGGGTGTAG   | 16067 + | AGG | 69    |
| ACTTGTTCTTTATGATAATA  | 16121 + | TGG | 499   |
| TTCTTTATGATAATATGGAT  | 16126 + | AGG | 117   |
| TATGGATAGGTTTAAAGCAAG | 16139 + | AGG | 349   |
| AAGAGGTATTTAAATATGTT  | 16156 + | TGG | 1596  |
| TTATAGGCTCTCCGTTTGTA  | 16165 - | GGG | 369   |
| TTTATAGGCTCTCCGTTTGT  | 16166 - | AGG | 736   |
| TATGTTTGGCACCCACAAA   | 16170 + | CGG | 941   |
| ACGTCATCAAATTCTTTTAT  | 16181 - | AGG | 1574  |
| AAAAGAATTTGATGACGTGT  | 16202 + | TGG | 248   |
| AGGTTTAGTATGTGTGTATA  | 16224 - | TGG | 298   |
| ATACTAAACCTGAACGATTA  | 16252 + | AGG | 282   |
| CTAAACCTGAACGATTAAGG  | 16255 + | AGG | 61    |
| TAAACCTGAACGATTAAGGA  | 16256 + | GGG | 134   |
| AAACCTGAACGATTAAGGAG  | 16257 + | GGG | 2     |
| AACCTGAACGATTAAGGAGG  | 16258 + | GGG | 4     |
| ATAGATGATATTGAAGCACA  | 16301 + | AGG | 33    |
| ATTAGAGCCTCAATATGCTT  | 16315 - | AGG | 10004 |
| AATATTGCCTAAGCATATTG  | 16324 + | AGG | 109   |

|                       |         |     |      |
|-----------------------|---------|-----|------|
| TAAAGACGATAGAGAGAGAA  | 16363 + | TGG | 113  |
| ATTGGTCGACGTTTGAATAT  | 16411 - | TGG | 3122 |
| AAATCTTCTTTTTCTTCAAT  | 16429 - | TGG | 3934 |
| GAAAAAGAAGATTTTGAAAC  | 16454 + | TGG | 331  |
| AAAGAAGATTTTGAAACTGG  | 16457 + | TGG | 101  |
| TTGAAACTGGTGGAAATGTA  | 16467 + | AGG | 90   |
| ACACGTGTTGGTTATTTACA  | 16550 + | TGG | 57   |
| TCATCTAAATCATAAGTAAC  | 16561 - | AGG | 198  |
| ACTATTTCTAATGGCAAAGT  | 16622 - | TGG | 1421 |
| ATCATCAACTATTTCTAA    | 16631 - | TGG | 921  |
| TAGAAATAGTGTTGATGATG  | 16651 + | AGG | 858  |
| GATGATGAGGATTCTGAAAT  | 16664 + | AGG | 77   |
| GGATTCTGAAATAGGTAAAA  | 16672 + | TGG | 272  |
| GGTAAAATGGCAGCAATTTG  | 16685 + | CGG | 497  |
| ATGGCAGCAATTTGCGGATA  | 16691 + | TGG | 4    |
| CAATTTGCGGATATGGTGCT  | 16698 + | AGG | 766  |
| TTAGCATATATTGATACGAA  | 16721 + | TGG | 29   |
| TTGATACGAATGGTGATGTT  | 16731 + | AGG | 233  |
| GCCAACAAAATAACATTAT   | 16754 - | AGG | 1435 |
| AAGTAGCGCAATGAGTATGT  | 16792 - | AGG | 1687 |
| TATGAAAAAGATGATGATAA  | 16832 + | TGG | 1091 |
| TATTATGTATTTGAGGAGA   | 16895 + | AGG | 29   |
| ATTGACGCTTTGCAAGAAGT  | 16919 + | TGG | 65   |
| TTGTTAGGTACACCAAACAA  | 16954 - | TGG | 64   |
| TTTGATTACAATCCATTGTT  | 16958 + | TGG | 883  |
| CCTATCATCTCTTTGTTGTT  | 16969 - | AGG | 2845 |
| CCTAACAAACAAAGAGATGAT | 16985 + | AGG | 112  |
| GATGATAGGAGATGCTGAAA  | 16999 + | AGG | 8    |
| TACCATACCGCGTAACACA   | 17082 - | AGG | 2963 |
| TTAGCATACCTTGTGTTACG  | 17090 + | CGG | 127  |
| ATACCTTGTGTTACGCGGTA  | 17095 + | TGG | 35   |
| TACCTTGTGTTACGCGGTAT  | 17096 + | GGG | 163  |
| ATTCAAGAAACACAAAAGAG  | 17135 + | TGG | 349  |
| TGAGTTGTTGACAAAAGATA  | 17164 + | TGG | 270  |
| TCTTTTCGATTTCGATCTAAA | 17217 - | TGG | 1648 |
| TTTAATTCTGACGAGTTTAA  | 17285 + | CGG | 48   |
| TTAAGTTTCATTCCAATGAT  | 17299 - | AGG | 16   |
| AACGGAAATGTACCTATCAT  | 17303 + | TGG | 279  |
| TGGAATGAACTTAACTTA    | 17323 + | TGG | 630  |
| GTAAGATGACAGCTATGTTG  | 17376 + | AGG | 1686 |
| TTATCTGCATTAAGCGTAA   | 17417 + | AGG | 814  |
| TATCTGCATTAAGCGTAAA   | 17418 + | GGG | 588  |
| AAAGCGTAAAGGGTACAAC   | 17428 + | TGG | 129  |

|                      |         |     |      |
|----------------------|---------|-----|------|
| TACGAGTGAACCTAAATATC | 17454 - | AGG | 1368 |
| GATTCTTCTAACTTATTAAC | 17482 - | TGG | 1055 |
| GTTCTGAACTTGTCCCTTC  | 17520 - | AGG | 2198 |
| ACAAGTGCTAATTAACCTGA | 17521 + | AGG | 202  |
| CAAGTGCTAATTAACCTGAA | 17522 + | GGG | 56   |
| GACAAGTTTCAGAACGAACA | 17544 + | AGG | 900  |
| GTTTCAGAACGAACAAGGTT | 17549 + | AGG | 1344 |
| TGATTACGAATTAGACGAAA | 17596 + | TGG | 607  |
| GCGTCACCTTCATCTATGTC | 17635 - | AGG | 689  |
| AAATTACCTGACATAGATGA | 17645 + | AGG | 1017 |
| TCATTCTGATTGGTTATTTT | 17669 - | GGG | 1827 |
| ATCATTCTGATTGGTTATTT | 17670 - | TGG | 79   |
| CTCATCAATATCATTCTGAT | 17679 - | TGG | 67   |
| TGATATTGATGAGTATATCG | 17705 + | AGG | 456  |
| GATATTGATGAGTATATCGA | 17706 + | GGG | 19   |
| TTAGCAAATAGTTGTTCTAT | 17735 - | TGG | 76   |
| ATGATGATGTGTATGTTACA | 17827 + | TGG | 854  |
| CTGAATTCAATAAATACAAC | 17851 + | AGG | 1929 |
| TAAATACAACAGGCTCAATA | 17861 + | AGG | 1070 |
| AATAAGGAGTAACTCGTAT  | 17877 + | AGG | 4235 |
| CATATAAATAAAGGCTCATA | 17962 - | AGG | 876  |
| GAGCCTTTATTTATATGAAA | 17984 + | TGG | 7    |
| GTTTGATGTTCCGAGTAAAG | 18026 + | AGG | 835  |
| ATTAAACGAATGAACTCAAT | 18056 - | AGG | 6481 |
| TCACGATGTTTTGTAGTGT  | 18080 - | TGG | 1021 |
| ATACGTATGCACATTACACA | 18135 + | AGG | 7229 |
| ATTACACAAGGTATTATGAG | 18147 + | TGG | 51   |
| ACAAGGTATTATGAGTGGAG | 18152 + | AGG | 49   |
| CAAGGTATTATGAGTGGAGA | 18153 + | GGG | 19   |
| AAAGCAATACGTGATGATGT | 18192 + | CGG | 320  |
| TAAAGCTCAATCATTGCGTG | 18221 + | TGG | 976  |
| GGCAGAGCAATGTCACAAGC | 18258 + | TGG | 231  |
| AGCTGGACTTGATAGCGCAA | 18275 + | TGG | 38   |
| GCAATGGTTGCTAAAGATAA | 18291 + | CGG | 17   |
| GTTTGAAGATGAAGAAACGT | 18313 + | TGG | 2284 |
| GATACTCATCGTCATTTAGA | 18363 + | TGG | 25   |
| ATACTCATCGTCATTTAGAT | 18364 + | GGG | 17   |
| TACTCATCGTCATTTAGATG | 18365 + | GGG | 864  |
| TCATTTAGATGGGGAATCAG | 18374 + | TGG | 165  |
| GATCAGAATTTTAAATCAAG | 18402 + | TGG | 366  |
| ATCAGAATTTTAAATCAAGT | 18403 + | GGG | 989  |
| TTTAAATCAAGTGGGTGTGT | 18411 + | TGG | 42   |
| TTAAATCAAGTGGGTGTGTT | 18412 + | GGG | 263  |



|                       |         |     |      |
|-----------------------|---------|-----|------|
| ATCAAGTGGGTGTGTTGGGC  | 18416 + | AGG | 365  |
| TTTACACCAATAAATAGCTT  | 18425 - | GGG | 409  |
| GTTTACACCAATAAATAGCT  | 18426 - | TGG | 290  |
| CAGGCGCCCAAGCTATTTAT  | 18435 + | TGG | 173  |
| TTACGTGCTCTCATTACAGT  | 18512 - | TGG | 2337 |
| ATGAGAGCACGTAAAGACGA  | 18537 + | TGG | 547  |
| ACTCACGATAAGTCATGAAT  | 18559 - | GGG | 358  |
| CATTCATGACTTATCGTGAG  | 18577 + | TGG | 720  |
| ATTCATGACTTATCGTGAGT  | 18578 + | GGG | 423  |
| TGGGAGAAATATAAGCGAAA  | 18597 + | AGG | 177  |
| GAGAAATATAAGCGAAAAGG  | 18600 + | TGG | 254  |
| CGAAAAGGTGGTAATTGATA  | 18612 + | TGG | 84   |
| ATAAAAGTAAATGTTGATAC  | 18643 + | TGG | 2415 |
| CTCTATTATCTCTTCGTACA  | 18682 - | AGG | 2947 |
| AAATGAAGCTGATTTAGATA  | 18759 + | TGG | 96   |
| AGCAGTTTAACGACATGCTA  | 18841 - | AGG | 33   |
| GCTTTTTATTATGCACTTTT  | 18877 + | CGG | 820  |
| TATGCACTTTTCGGACTGTT  | 18886 + | AGG | 71   |
| ATGCACTTTTCGGACTGTTA  | 18887 + | GGG | 156  |
| CGGACTGTTAGGGTACGCGA  | 18897 + | AGG | 32   |
| GGACTGTTAGGGTACGCGAA  | 18898 + | GGG | 4    |
| AGGGTACGCGAAGGGCAAAA  | 18906 + | AGG | 1    |
| AGAAGTAAAAGATTATCTAA  | 18990 + | AGG | 52   |
| GAAGTAAAAGATTATCTAAA  | 18991 + | GGG | 1    |
| TTATCTAAAGGGACTTAAGA  | 19002 + | CGG | 219  |
| GTGTCTGTTGATGACGTTAA  | 19024 + | AGG | 104  |
| GAATGATAACGATCTAATTC  | 19068 - | AGG | 2867 |
| TTAGATCGTTATCATTGAA   | 19090 + | AGG | 72   |
| ATGGAAAGAGAAAAATCTTG  | 19122 + | AGG | 798  |
| ATCTAATCGAACAAAGAAGTA | 19145 + | CGG | 277  |
| TTTTGTTCTTCTGATTGCTC  | 19161 - | AGG | 468  |
| GTTAGAAAAACGCGACGCAG  | 19224 + | AGG | 571  |
| AAGTTAAGAAGTAACGCGCT  | 19258 + | AGG | 358  |
| TAACGCGCTAGGTAAAGCGC  | 19269 + | AGG | 38   |
| AATCTATCAACTAAGGATGT  | 19287 - | TGG | 112  |
| GCCTAAAAATCTATCAACTA  | 19294 - | AGG | 761  |
| TCCTTAGTTGATAGATTTTT  | 19309 + | AGG | 372  |
| TTTTTGAACATACTTGTCOA  | 19363 - | AGG | 501  |
| TTTGACAAGTATGTTCAAAA  | 19381 + | AGG | 105  |
| GAGTCTAAATTTAAATCGAG  | 19408 + | TGG | 1249 |
| CAATGGACTTTACATTTGAA  | 19451 - | GGG | 10   |
| TCAATGGACTTTACATTTGA  | 19452 - | AGG | 16   |
| TTCTTTCGCCATTTCTTCAA  | 19468 - | TGG | 632  |

|                       |         |     |      |
|-----------------------|---------|-----|------|
| TGTAAAGTCCATTGAAGAAA  | 19476 + | TGG | 172  |
| CAATATTAGAAAATAAAGTG  | 19509 + | AGG | 151  |
| TAAAGTGAGGTAATAAAAATA | 19522 + | TGG | 17   |
| ACATTGCCTGGCGTGTATGT  | 19534 - | TGG | 331  |
| GCAACTCCAACATACACGCC  | 19544 + | AGG | 496  |
| TCCGATAAAAATAACATTGCC | 19546 - | TGG | 1139 |
| GCCAGGCAATGTTATTTTAT  | 19561 + | CGG | 10   |
| ATTAAAGTACCTTGTTCTGC  | 19588 - | TGG | 1976 |
| GGCGTTATTCCAGCAGAACA  | 19595 + | AGG | 214  |
| TTTAATCATGAAAGACATTA  | 19621 + | TGG | 53   |
| TTTTTCTTTGTGCTGTCAT   | 19663 - | TGG | 948  |
| AAATTTACTTACTTAGCAAA  | 19700 + | AGG | 9    |
| ACTTACTTAGCAAAAGGTGT  | 19706 + | AGG | 598  |
| CAAAGGTGTAGGCGCCTAC   | 19716 + | TGG | 36   |
| AAAAGGTGTAGGCGCCTACT  | 19717 + | GGG | 146  |
| ATTTCTGCTTGTGCATATTC  | 19753 - | AGG | 1686 |
| TGAATATGCACAAGCAGAAA  | 19771 + | TGG | 268  |
| GAAATGGAAGCTAAGAAAAT  | 19787 + | TGG | 4    |
| TTAAGAAACTCTTTTGATAA  | 19804 - | CGG | 19   |
| TGCAAAAGATTTCTTTAATG  | 19849 + | AGG | 277  |
| TAAAATGCCTCTGCAATTAG  | 19861 - | AGG | 178  |
| GGTTAAACCTCTAATTGCAG  | 19870 + | AGG | 87   |
| TAGTACCAAGATAACAGCT   | 19896 - | TGG | 458  |
| TTTGACCAAGCTGTTATCTT  | 19907 + | TGG | 1263 |
| CCACTAGTTGAAGTGTTGTA  | 19924 - | AGG | 59   |
| CCTTACAACACTTCAACTAG  | 19940 + | TGG | 358  |
| AGTGGTAAACCGCTTGTTGA  | 19958 + | AGG | 417  |
| GTTGAAGGCGCAGAAGAGAA  | 19973 + | AGG | 22   |
| TAGTAGCCATTAATGCCGAA  | 20016 - | AGG | 173  |
| TAATTTATACGTAGACCTTT  | 20017 + | CGG | 875  |
| GATGAAGAGTTAGATCCAAA  | 20060 + | CGG | 1    |
| TTCCCGTTAGCATCAAATAA  | 20128 - | TGG | 145  |
| AGACCATTATTTGATGCTAA  | 20141 + | CGG | 12   |
| GACCATTATTTGATGCTAAC  | 20142 + | GGG | 1924 |
| TCCGCTCCAGTATAAGATAG  | 20167 - | TGG | 53   |
| GGATTACCACTATCTTATAC  | 20177 + | TGG | 874  |
| ACCACTATCTTATACTGGAG  | 20182 + | CGG | 36   |
| AAAGAAATCGTTAGCACTAA  | 20218 + | TGG | 7    |
| AAGAAATCGTTAGCACTAAT  | 20219 + | GGG | 1868 |
| CGTTAGCACTAATGGGTGAT  | 20226 + | TGG | 91   |
| GTTAGCACTAATGGGTGATT  | 20227 + | GGG | 133  |
| GATTGGGATTACGCACGTTA  | 20243 + | CGG | 932  |
| GCACGTTACGGTATCTTACA  | 20255 + | AGG | 213  |

|                       |         |     |      |
|-----------------------|---------|-----|------|
| TGCTTGTAACGTCGTTAACG  | 20288 - | TGG | 1476 |
| TTACAAGCATCAGATGCTTC  | 20318 + | TGG | 15   |
| GTTCAAATAATGATACTGGT  | 20325 - | TGG | 1334 |
| TCACGTTCAAATAATGATAC  | 20329 - | TGG | 10   |
| TTAAGCGTTGCGAACGCTTC  | 20401 - | TGG | 48   |
| CATATCTCCTCCTATTCAGT  | 20425 - | TGG | 1415 |
| AACGCTTAAACCAACTGAAT  | 20431 + | AGG | 305  |
| GCTTAAACCAACTGAATAGG  | 20434 + | AGG | 75   |
| CTGAATAGGAGGAGATATGA  | 20445 + | TGG | 83   |
| TTTACCTTAATATCTTCTGC  | 20457 - | AGG | 509  |
| TAATCCTGCAGAAGATATTA  | 20469 + | AGG | 15   |
| GACTATTACTGTTACAAAGA  | 20508 + | AGG | 105  |
| GACTCTTATTACAGTCTTGT  | 20536 + | CGG | 1291 |
| CAGTCTTGTCGTTACAAAG   | 20547 + | AGG | 164  |
| CGCTCTTATCAGACGTAGTA  | 20564 - | CGG | 1503 |
| AAACTTTTTACTCAAGAAAAA | 20634 + | TGG | 27   |
| TTTACTCAAGAAAAATGGAG  | 20639 + | TGG | 146  |
| TGAAGAAGAAATATTTAAGA  | 20675 + | TGG | 361  |
| ATATTTAAGATGGAAGTTGA  | 20685 + | CGG | 46   |
| ACGGAATACTAGAAGATGTT  | 20704 + | AGG | 357  |
| AACAATGATTTTATGAAAGA  | 20736 + | TGG | 137  |
| ACATACTTTTTGATTGAGTA  | 20756 - | AGG | 120  |
| CAGGTCGTTGATAAATACTCT | 20788 - | AGG | 668  |
| TTTAAATTCTTTTTAACTTC  | 20807 - | AGG | 42   |
| GAATTTAAAGTCAAGAAGTA  | 20837 + | TGG | 116  |
| AATTTAAAGTCAAGAAGTAT  | 20838 + | GGG | 1227 |
| ATTTAAAGTCAAGAAGTATG  | 20839 + | GGG | 1497 |
| GTGTCGTACTTATAACGA    | 20865 + | TGG | 97   |
| ATACTCCACTAATGTAATCA  | 20875 - | GGG | 49   |
| AATACTCCACTAATGTAATC  | 20876 - | AGG | 473  |
| GGTGTCCCTGATTACATTAG  | 20886 + | TGG | 40   |
| ACATTAGTGGAGTATTTAAAC | 20899 + | AGG | 346  |
| CTCTACCTTATTGATTTAAA  | 20927 - | CGG | 17   |
| TTCATCCGTTTAAATCAATA  | 20938 + | AGG | 813  |
| CGTTTAAATCAATAAGGTAG  | 20944 + | AGG | 857  |
| GTGTGAGGGAATTCGTCGTA  | 20968 - | TGG | 390  |
| TTCCAATAGAAATAGTGTGA  | 20982 - | GGG | 2    |
| CTTCCAATAGAAATAGTGTG  | 20983 - | AGG | 1    |
| TTCCCTCACACTATTTCTAT  | 20996 + | TGG | 933  |
| ATTGGAAGTATCAAAAAAGT  | 21014 + | AGG | 91   |
| ACAAAGCGTTCTTGATAAT   | 21028 - | TGG | 111  |
| GTAAGCGATAAAACAATTAA  | 21065 + | AGG | 2    |
| TAAAACAATTAAGGATTTA   | 21073 + | TGG | 176  |

|                       |         |     |      |
|-----------------------|---------|-----|------|
| TTTAGTTGTTTCAGATGTAGT | 21085 - | AGG | 2536 |
| GTAAGTCGTAAGGTACATAT  | 21141 - | AGG | 324  |
| TTAGCTATTGGTAAGTCGTA  | 21151 - | AGG | 38   |
| AATAAATTGTTTTAGCTAT   | 21163 - | TGG | 1577 |
| AAACAATTTATTTGAGTATG  | 21190 + | AGG | 3    |
| AACAATTTATTTGAGTATGA  | 21191 + | GGG | 75   |
| GGTAGAATCTTTAGTATTGT  | 21212 + | AGG | 129  |
| TGTAGGCGATTCTGTAGATC  | 21229 + | AGG | 212  |
| GGCGATTCTGTAGATCAGGG  | 21233 + | CGG | 31   |
| TAAACTACTACGACTTAAGC  | 21268 + | AGG | 388  |
| CGTACTTAACTTTTGCCATA  | 21277 - | TGG | 1343 |
| CGACTTAAGCAGGTGCCATA  | 21278 + | TGG | 3534 |
| CATATGGCAAAGTTAAGTA   | 21294 + | CGG | 3    |
| TAAGTACGGTGCTGATAGCA  | 21308 + | TGG | 318  |
| TGATAGCATGGTTGTTGAAT  | 21320 + | TGG | 12   |
| TCGATAAGAAAATAGAAGAG  | 21349 + | TGG | 14   |
| CGATAAGAAAATAGAAGAGT  | 21350 + | GGG | 388  |
| ATAGAAGAGTGGGTAAAAA   | 21360 + | AGG | 9    |
| TCTAAAAAACCTAAGTCAAC  | 21416 - | AGG | 2733 |
| GCATTAGCTCCTGTTGACTT  | 21423 + | AGG | 314  |
| ATTGACTTTAAATATTTCGA  | 21462 + | TGG | 51   |
| GACTTTAAATATTTTCGATGG | 21465 + | TGG | 332  |
| ACTTTAAATATTTTCGATGGT | 21466 + | GGG | 94   |
| TGCGCCGACACTTATAACAC  | 21477 - | TGG | 23   |
| TTATCCAGTGTTATAAGTGT  | 21489 + | CGG | 146  |
| TATGCAATATACGTTGAATA  | 21519 + | CGG | 47   |
| ATATACGTTGAATACGGTAC  | 21525 + | TGG | 35   |
| GGTACTGGTATATATGCTAC  | 21540 + | TGG | 58   |
| GGTATATATGCTACTGGTCC  | 21546 + | TGG | 319  |
| TTTGTAGCACGACTACCACC  | 21548 - | AGG | 918  |
| ATATATGCTACTGGTCCTGG  | 21549 + | TGG | 69   |
| AAGATTCCGTGGAGTTTTAA  | 21585 + | AGG | 2    |
| TGGAGTTTTAAAGGTGATGA  | 21594 + | CGG | 32   |
| TTAAAGGTGATGACGGCGAA  | 21601 + | TGG | 4    |
| GGCGAATGGTACACAACATA  | 21615 + | TGG | 1293 |
| GCAGGGTTCCAAAATGGCTG  | 21629 - | TGG | 17   |
| TCAATTGCAGGGTTCCAAA   | 21635 - | TGG | 9    |
| GTCAAGCGCCACAGCCATTT  | 21637 + | TGG | 155  |
| TGCGTCCTGCGTCAATTGCA  | 21646 - | GGG | 587  |
| TTGCGTCCTGCGTCAATTGC  | 21647 - | AGG | 159  |
| TGGAACCTGCAATTGACGC   | 21657 + | AGG | 244  |
| TCGAGCAGTATTTTTCATAG  | 21691 + | AGG | 17   |
| AGCAGTATTTTTCATAGAGG  | 21694 + | TGG | 238  |

|                        |         |     |      |
|------------------------|---------|-----|------|
| CATAGAGGTGGTTAAATATG   | 21706 + | TGG | 11   |
| TATATTTGATTTGTAAGTTC   | 21725 - | AGG | 1843 |
| CAACTAGTTTGTAAATGTTA   | 21766 - | GGG | 50   |
| TCAACTAGTTTGTAAATGTT   | 21767 - | AGG | 88   |
| TTAACAACTAGTTGATGAT    | 21790 + | AGG | 142  |
| TAACAACTAGTTGATGATA    | 21791 + | GGG | 4    |
| ATTCACCCACAACAATATAT   | 21829 - | GGG | 3648 |
| GATTCACCCACAACAATATA   | 21830 - | TGG | 170  |
| TGTTTACCCATATATTGTTG   | 21839 + | TGG | 111  |
| GTTTACCCATATATTGTTGT   | 21840 + | GGG | 1989 |
| GCAACAATGAGAGAAACAGT   | 21894 + | CGG | 54   |
| ACAGTTCGCTACACAATACG   | 21938 + | AGG | 309  |
| AAGCTCATTTTAAGCGCGAT   | 21963 + | AGG | 58   |
| TCGTAATTATCTATTTCTAT   | 21986 - | AGG | 342  |
| ATACTGCTTGACTIONCGATA  | 22021 - | CGG | 37   |
| TAGTAAACCTGTCTATATCA   | 22045 - | GGG | 90   |
| TTAGTAAACCTGTCTATATC   | 22046 - | AGG | 29   |
| CAGTATTCCTGATATAGAC    | 22054 + | AGG | 416  |
| ATAGACAGGTTTACTAAGCA   | 22068 + | TGG | 248  |
| TTACTAAGCATGGCACGATA   | 22078 + | CGG | 136  |
| AGACATAAAAAGAAAAACGA   | 22116 + | AGG | 38   |
| AAACGAAGGAGTGTATTTAAA  | 22130 + | TGG | 35   |
| GGATCTAAGTCAGTTTCAGC   | 22166 - | TGG | 2923 |
| TTATTAGCTGACTTACAAGA   | 22218 + | AGG | 201  |
| TTAGCTGACTTACAAGAAGG   | 22221 + | TGG | 3    |
| GATTTAGCTGAAATAGTACG   | 22260 + | AGG | 251  |
| AATAGTACGAGGCGGTAAAA   | 22271 + | CGG | 3    |
| AATGATTCTGACATTGCATT   | 22286 - | GGG | 2358 |
| AAATGATTCTGACATTGCAT   | 22287 - | TGG | 52   |
| GAATCATTTAAATTAACAAT   | 22317 + | TGG | 146  |
| TTAACAAATTGGTAATGTGCC  | 22329 + | TGG | 140  |
| GCTTCAATTCCTTTATCTCC   | 22331 - | AGG | 46   |
| GGTAATGTGCCTGGAGATAA   | 22338 + | AGG | 1    |
| GTGAAACACGCTGTACAAAC   | 22371 + | AGG | 1228 |
| AAACACGCTGTACAAACAGG   | 22374 + | TGG | 8    |
| CAGGTGGACAGTTGCGTATA   | 22390 + | TGG | 9    |
| GAGCGTAATAAACGTGCAGA   | 22419 + | CGG | 51   |
| CGTGCAGACGGTAAACATCA   | 22431 + | CGG | 9    |
| GGTAAACATCACGGAATGTT   | 22440 + | TGG | 1029 |
| AATGACATTTCAAATGATTC   | 22457 - | TGG | 301  |
| AACTATCATTAATAAAGTTAAA | 22519 + | TGG | 501  |
| GCAGCTTCAAACCACTCTTT   | 22556 - | CGG | 199  |
| AAGATAACTTGCCGAAAGAG   | 22561 + | TGG | 28   |

|                       |         |     |      |
|-----------------------|---------|-----|------|
| AAAGAGTGGTTTGAAGCTGC  | 22575 + | AGG | 155  |
| AATTTTTCGTATTCAACTGT  | 22586 - | AGG | 911  |
| ACAGTTGAATACGAAAAATT  | 22605 + | CGG | 30   |
| GAAAAATTCGGCGAAAAAGT  | 22617 + | CGG | 100  |
| TGTTGTATCTGATTCACACA  | 22667 + | CGG | 2305 |
| ATCTATTAGTTTACATAGAA  | 22678 - | TGG | 129  |
| CTATGTAACTAATAGATCA   | 22699 + | AGG | 51   |
| TATGTAACTAATAGATCAA   | 22700 + | GGG | 15   |
| ATGTAACTAATAGATCAAG   | 22701 + | GGG | 28   |
| TGTAACTAATAGATCAAGG   | 22702 + | GGG | 8    |
| TTTATAAAAAAATTGAAAAG  | 22742 + | AGG | 13   |
| TTAATTTTTAATGTTGTAAT  | 22772 - | TGG | 165  |
| ACAACATTAATAAATTAATGA | 22794 + | CGG | 127  |
| CTGAGAATTTTTCAGCTTTT  | 22846 - | CGG | 406  |
| TTCTCAGAAGATAGCGAAGA  | 22878 + | TGG | 4    |
| TCTCAGAAGATAGCGAAGAT  | 22879 + | GGG | 48   |
| GATAGCGAAGATGGGAGAAA  | 22887 + | AGG | 23   |
| GGGAGAAAAGGAGCAATGCC  | 22899 + | AGG | 178  |
| TTAAATATAACATTGAATCC  | 22901 - | TGG | 750  |
| GGATTCAATGTTATATTTAA  | 22920 + | CGG | 20   |
| CTAATTGTTCTCGAGTTGGT  | 22993 - | GGG | 519  |
| TCTAATTGTTCTCGAGTTGG  | 22994 - | TGG | 49   |
| TTTTCTAATTGTTCTCGAGT  | 22997 - | TGG | 1843 |
| TGATTTCACTACTGAAAACG  | 23045 + | AGG | 24   |
| TCCAAAGCCCCTTGTAAATA  | 23060 - | CGG | 193  |
| GATACTTTGCCGTTATTACA  | 23067 + | AGG | 380  |
| ATACTTTGCCGTTATTACAA  | 23068 + | GGG | 4    |
| TACTTTGCCGTTATTACAAG  | 23069 + | GGG | 1    |
| GCCGTTATTACAAGGGGCTT  | 23075 + | TGG | 127  |
| ACAATAGTGGTTTTTTCAAG  | 23107 + | AGG | 54   |
| CAATAGTGGTTTTTTCAAGA  | 23108 + | GGG | 18   |
| AGAGGGAGAGTCGCTCGTAC  | 23125 + | TGG | 148  |
| TCCTCGCTTTTGGCCATATT  | 23150 - | CGG | 83   |
| ATTGAACAAAGCACCGAATA  | 23153 + | TGG | 63   |
| CATTTCTTTGTCCTCGCTTT  | 23160 - | TGG | 19   |
| ACCGAATATGGCCAAAAGCG  | 23165 + | AGG | 190  |
| GACAAAGAAATGACGAAAGC  | 23187 + | AGG | 838  |
| AATGATGAAAGAGAATTACA  | 23216 + | AGG | 8    |
| AGAGAATTACAAGGAAATCA  | 23225 + | TGG | 64   |
| GAGAATTACAAGGAAATCAT  | 23226 + | GGG | 323  |
| TATTTTTGAGTAATCGTGTA  | 23240 - | AGG | 156  |
| TACACGATTACTCAAAAATA  | 23259 + | AGG | 11   |
| CAACTGACAGCTAGATATTT  | 23282 + | AGG | 459  |

|                       |         |     |      |
|-----------------------|---------|-----|------|
| GTGCTAACAATTCATGTTCA  | 23295 - | GGG | 40   |
| AGTGCTAACAATTCATGTTTC | 23296 - | AGG | 49   |
| AGCCAATCACGCCATTCAGC  | 23323 - | AGG | 790  |
| TAGCACTAACACCTGCTGAA  | 23328 + | TGG | 276  |
| CACCTGCTGAATGGCGTGAT  | 23337 + | TGG | 28   |
| TGGCGTGATTGGCTTATTGG  | 23348 + | TGG | 17   |
| TGATTGGCTTATTGGTGGTC  | 23353 + | AGG | 13   |
| GGCTTATTGGTGGTCAGGAT  | 23358 + | AGG | 145  |
| TTAATAATTGTCTTTGATCT  | 23367 - | AGG | 170  |
| ATTGAACAAGCGCAAGCTAA  | 23405 + | CGG | 242  |
| GCTTAGTACAAGCTTCTAAG  | 23427 + | AGG | 63   |
| CGTTACGAAATAAGAGAACC  | 23483 + | TGG | 366  |
| TGTACACGAGCATAGCTACC  | 23485 - | AGG | 7169 |
| GCTAACCTCCTTTTCGATTCA | 23571 - | AGG | 5    |
| AAATTCCTTGAATCGAAAGG  | 23582 + | AGG | 5    |
| GCCATAAAATGAGTATCCAA  | 23593 - | AGG | 401  |
| ATCGAAAGGAGGTTAGCCTT  | 23593 + | TGG | 146  |
| GCCTTTGGATACTCATTTTA  | 23608 + | TGG | 140  |
| TCATTTTATGGCAAAGATTA  | 23620 + | TGG | 18   |
| GAGCTTTCCTTACGTTGCTT  | 23643 - | TGG | 119  |
| GAGATTTCCAAAGCAACGTA  | 23652 + | AGG | 860  |
| ACATCTGTTTCAATTCGTT   | 23689 - | TGG | 2044 |
| TAGCGCGTTGTAAAGCTCTT  | 23733 - | TGG | 260  |
| TTTACAACGCGCTAAATCAA  | 23758 + | TGG | 554  |
| CTAAATCAATGGCTCAACGA  | 23769 + | TGG | 330  |
| CTAAAGCTACTGTCGAAGCT  | 23937 + | TGG | 254  |
| GAGAAAACATGTTGTTAAGT  | 23959 + | TGG | 302  |
| CTTTAACCGCCATTTTAGCG  | 23979 - | GGG | 66   |
| CCTTTAACCGCCATTTTAGC  | 23980 - | GGG | 62   |
| CCCTTTAACCGCCATTTTAG  | 23981 - | CGG | 1    |
| AGATGCAAACCCCGCTAAAA  | 23986 + | TGG | 42   |
| TGCAAACCCCGCTAAAATGG  | 23989 + | CGG | 79   |
| CCCGCTAAAATGGCGGTAA   | 23996 + | AGG | 1    |
| AAGATTTAATAGATCTTAGC  | 24027 + | AGG | 3405 |
| ATTTCCTAATTTCCATCTGC  | 24053 - | TGG | 3857 |
| TTGATATTGATTCCAGCAGA  | 24057 + | TGG | 12   |
| GATTCCAGCAGATGGAAATT  | 24065 + | AGG | 22   |
| AAAGAATTCAATGAAGTCGA  | 24101 + | AGG | 5    |
| GGAGCAGTTAAACGTTCTTT  | 24122 + | CGG | 57   |
| ATTATGAGAAAAGAAGTAAA  | 24158 + | TGG | 150  |
| TAAATGGAACAAGTGATATT  | 24174 + | TGG | 438  |
| AAATGGAACAAGTGATATTT  | 24175 + | GGG | 2    |
| AATGGAACAAGTGATATTTG  | 24176 + | GGG | 50   |

|                       |         |     |      |
|-----------------------|---------|-----|------|
| AACAACCTCATTGAAAGATTA | 24206 + | CGG | 199  |
| GAAAGATTACGGCGAGAAAA  | 24217 + | TGG | 5    |
| AGTTCGGATTTTAGTAGCTA  | 24227 - | AGG | 33   |
| CGAAGATAGTACCGAAAGTT  | 24243 - | CGG | 22   |
| GCTACTAAAATCCGAACTTT  | 24248 + | CGG | 120  |
| CGGTACTATCTTCGCGCAAC  | 24268 + | AGG | 470  |
| ATCTTCGCGCAACAGGTCAA  | 24275 + | AGG | 114  |
| GGTACTAATCCGGCAATCAC  | 24313 - | TGG | 95   |
| GCATTGATACCAGTGATTGC  | 24320 + | CGG | 110  |
| CATTATTGCAGGTACTAATC  | 24323 - | CGG | 46   |
| TTAAGTACTGCCATTATTGC  | 24334 - | AGG | 128  |
| CGGATTAGTACCTGCAATAA  | 24340 + | TGG | 222  |
| AATAATGGCAGTACTTAATG  | 24355 + | CGG | 2    |
| ATGGCAGTACTTAATGCGGT  | 24359 + | TGG | 12   |
| CTAATGCGGTTGGTGTATT   | 24368 + | AGG | 44   |
| GCGGTTGGTGTATTAGGTGG  | 24374 + | TGG | 10   |
| GTTGGCGCATTCTCTGTCGC  | 24410 + | AGG | 106  |
| GCATTCTCTGTCGCAGGTCT  | 24416 + | TGG | 209  |
| GTCGCAGGTCTTGGAGTTGT  | 24425 + | TGG | 10   |
| GGTCTTGGAGTTGTTGGCTT  | 24431 + | TGG | 6    |
| AGTTGTTGGCTTTGGTGCAA  | 24439 + | TGG | 99   |
| GGCTATTAGCGCTCTTAAAA  | 24460 + | TGG | 105  |
| GCTCTTAAAATGGTTGAAGA  | 24470 + | TGG | 5    |
| AATGGTTGAAGATGGAACAT  | 24478 + | TGG | 25   |
| GCGATCAGTTAAAACTACA   | 24537 + | TGG | 912  |
| ATCTTTAATGCGATGTCAGC  | 24590 + | AGG | 2873 |
| GCGATGTCAGCAGGTATCAG  | 24599 + | AGG | 80   |
| ATAGATACTTCAGATAAGAA  | 24634 - | TGG | 133  |
| AGCAAACGCACGCAAGTTTG  | 24682 + | AGG | 411  |
| ACGCACGCAAGTTTGAGGAT  | 24687 + | TGG | 65   |
| CGCACGCAAGTTTGAGGATT  | 24688 + | GGG | 74   |
| TTTGAAGCATTGAATAGCAT  | 24740 + | AGG | 77   |
| AGCATAGGTGGCGCAATCTT  | 24755 + | CGG | 8    |
| GGAGATTTATTGAACGCTGC  | 24776 + | AGG | 22   |
| TTGAACGCTGCAGGAAGATT  | 24785 + | TGG | 252  |
| GCTGCAGGAAGATTTGGCGA  | 24791 + | CGG | 2    |
| TGAGACACAAATTTGAACAA  | 24826 - | CGG | 49   |
| TTGTTCAAATTTGTGTCTCA  | 24845 + | AGG | 121  |
| AGCCCAATTTTGGAAAGCTA  | 24866 - | TGG | 89   |
| CCACACTATTAGCCCAATTT  | 24876 - | TGG | 131  |
| TGTCCATAGCTTTCCAAAAT  | 24879 + | TGG | 58   |
| GTCCATAGCTTTCCAAAATT  | 24880 + | GGG | 13   |
| CCAAAATTGGGCTAATAGTG  | 24892 + | TGG | 60   |



|                      |         |     |      |
|----------------------|---------|-----|------|
| AATTGGGCTAATAGTGTGGC | 24896 + | TGG | 42   |
| ACCACTAACTTACCTAAGAT | 24953 + | TGG | 525  |
| CCTAAGATTGGTCAGATATT | 24965 + | TGG | 133  |
| ATATTTGGCAATGTGTTCCG | 24980 + | TGG | 789  |
| GGCAATGTGTTGCTGGTAT  | 24986 + | TGG | 391  |
| ACAGTTCTAACATTTTTGAC | 25035 + | TGG | 242  |
| TAAGTTCTCAATTTAGAGCA | 25068 + | TGG | 9    |
| AGAGCATGGTCAGAACAAGT | 25082 + | AGG | 339  |
| GAACAAGTAGGACAATCACA | 25094 + | AGG | 21   |
| ATCAGTTACGTTCAAGAGAA | 25130 + | TGG | 5    |
| CCGATTAAGTGCATAATAGT | 25138 - | AGG | 1275 |
| CCTACTATTATGCAGTTAAT | 25154 + | CGG | 96   |
| TAATATCGTAAAAGCGTTAG | 25177 + | TGG | 473  |
| GTAAAAGCGTTAGTGGCATT | 25184 + | TGG | 1264 |
| AGTGGCATTGGTACTGCAA  | 25195 + | TGG | 15   |
| TCTAGTAATTTACTAGCTAT | 25204 - | AGG | 137  |
| GATTTGTTACTAATTTAGC  | 25241 + | TGG | 1    |
| TGGGTGTGCTTCGAATAGTT | 25256 - | TGG | 66   |
| CGATAATTTGAGCGACTGCT | 25275 - | GGG | 162  |
| CCGATAATTTGAGCGACTGC | 25276 - | TGG | 302  |
| CCAGCAGTCGCTCAAATTAT | 25292 + | CGG | 10   |
| GCTCAAATTATCGGTGTTAT | 25301 + | CGG | 18   |
| ATCGGTGTTATCGGTATTTT | 25310 + | AGG | 93   |
| GTATTTTAGGTGGCGTATTT | 25323 + | TGG | 15   |
| TATTTTAGGTGGCGTATTTT | 25324 + | GGG | 105  |
| TGGCGTATTTTGGGCTTTAA | 25333 + | TGG | 111  |
| AACTGCTAACAGCTGCAAT  | 25342 - | CGG | 565  |
| CTGGATTTAACTAGAATAAC | 25430 + | TGG | 3    |
| TGGATTTAACTAGAATAACT | 25431 + | GGG | 655  |
| GGATTTAACTAGAATAACTG | 25432 + | GGG | 128  |
| TTTAACTAGAATAACTGGGG | 25435 + | TGG | 7    |
| GGGGTGGTAAGTAAAGCGTT | 25451 + | CGG | 1    |
| AAAGCGTTCGGTTTATTGAC | 25463 + | TGG | 2    |
| GTGCTTTCACAAGTATTTCT | 25485 + | TGG | 883  |
| ACTGCAACTACTGCTAATAT | 25492 - | TGG | 337  |
| GCAGTCATTGGTGTATTCAT | 25526 + | TGG | 98   |
| TTGGTATTCTTGTATTTA   | 25545 + | TGG | 23   |
| GAAAAACAATAACAGAAGCT | 25587 + | TGG | 705  |
| ACAATAACAGAAGCTTGGAA | 25592 + | CGG | 132  |
| GGTATTTAAACAGCAGTTTC | 25613 + | CGG | 327  |
| TACTACACCTGAATCGCAC  | 25616 - | CGG | 89   |
| GCAGTTTCCGGTGCATTCA  | 25625 + | AGG | 17   |
| CGATTCAAGGTGTAGTAGAT | 25638 + | TGG | 226  |

|                       |         |     |      |
|-----------------------|---------|-----|------|
| TAGATTGGTTAACTCAATTG  | 25653 + | TGG | 276  |
| AGATTGGTTAACTCAATTGT  | 25654 + | GGG | 34   |
| GATTGGTTAACTCAATTGTG  | 25655 + | GGG | 44   |
| TGTCCTAATACTTGTAATAT  | 25693 - | AGG | 173  |
| ATGCCTATATTACAAGTATT  | 25706 + | AGG | 78   |
| CATGCAAGTTTTAGGTGTTT  | 25738 + | TGG | 280  |
| GTTTTAGGTGTTTTGGTAAT  | 25745 + | AGG | 20   |
| AATGTTATGAATATCATACA  | 25778 + | AGG | 5    |
| TGAATATCATACAAGGTTTG  | 25785 + | TGG | 261  |
| ATATCACTGTTCTATGGCT   | 25812 - | TGG | 208  |
| ACAATTGCGTTCGAAGCCAT  | 25817 + | AGG | 55   |
| TACGGATATCACTGTTCTTA  | 25817 - | TGG | 45   |
| TACTATGATTTGGACAGCTA  | 25835 - | CGG | 42   |
| TGAATAAACCTACTATGATT  | 25845 - | TGG | 181  |
| GTAGCTGTCCAAATCATAGT  | 25853 + | AGG | 45   |
| GCTTTAATTCAGTTGCTTAC  | 25886 + | TGG | 1161 |
| TTGCTTACTGGCGACTTCTC  | 25898 + | AGG | 20   |
| CTGGCGACTTCTCAGGTGCT  | 25905 + | TGG | 15   |
| TGGCGACTTCTCAGGTGCTT  | 25906 + | GGG | 53   |
| TTGGGAGACTATTA AAACTA | 25924 + | CGG | 2    |
| CCAAATCGTATCAAGTACAT  | 25934 - | TGG | 1492 |
| CCAATGTACTTGATACGATT  | 25950 + | TGG | 81   |
| GGCAATACATGCAATCAGTT  | 25971 + | TGG | 278  |
| TCAGTTTGGGAGTCAATTAT  | 25985 + | CGG | 13   |
| TCAATTATCGGCTTTTAAAC  | 25997 + | TGG | 28   |
| AATCGAACGCTTTCAATGTT  | 26027 + | TGG | 201  |
| TTTCAATGTTTGGTACAAGT  | 26037 + | TGG | 19   |
| GTACAAGTTGGTCACAGATA  | 26049 + | TGG | 37   |
| CTAATTTTGTTAGCAGTATT  | 26082 + | TGG | 141  |
| TTTGGAGCACTGTTACAAGT  | 26100 + | TGG | 754  |
| GTTGGTTCAGTCGTGTTGCT  | 26118 + | TGG | 115  |
| CAGTCGTGTTGCTTGGAGTG  | 26125 + | TGG | 105  |
| TGGAGTGTGGCTGAAAAAAT  | 26138 + | GGG | 128  |
| TTAAACTTTATTATCACAAA  | 26168 + | AGG | 1    |
| CTGAATGGGTTTCTAACATT  | 26193 + | TGG | 1180 |
| TTCGCGAGTAAAGTAGCTGA  | 26231 + | TGG | 3    |
| TCGCGAGTAAAGTAGCTGAT  | 26232 + | GGG | 216  |
| AAAAGAGTTGTCTCAAATGT  | 26258 + | AGG | 14   |
| GTTGTCTCAAATGTAGGTGA  | 26264 + | CGG | 70   |
| GACGGTATGAGTGATGCACT  | 26282 + | TGG | 591  |
| TTCAGTGATTTCTTAAATGC  | 26321 + | CGG | 340  |
| TTTGCCGATTAATTCCGCTC  | 26324 - | CGG | 131  |
| TGATTTCTTAAATGCCGGAG  | 26326 + | CGG | 36   |

|                       |         |     |      |
|-----------------------|---------|-----|------|
| AATGCCGGAGCGGAATTAAT  | 26336 + | CGG | 142  |
| ATTAATCGGCAAAGTAGCTG  | 26350 + | AGG | 373  |
| TTAATCGGCAAAGTAGCTGA  | 26351 + | GGG | 46   |
| GACTACTTTGTGCGCAGCAT  | 26363 - | TGG | 115  |
| TGCGCACAAAGTAGTCAGCG  | 26386 + | CGG | 34   |
| CACAAAGTAGTCAGCGCGGT  | 26390 + | AGG | 557  |
| GCGATGCGATTTTCATCAGCT | 26412 + | TGG | 31   |
| CGATGCGATTTTCATCAGCTT | 26413 + | GGG | 37   |
| TCTGTAAC TTCATTCGTAAG | 26438 + | TGG | 40   |
| ACTTCATTCGTAAGTGGACA  | 26444 + | CGG | 50   |
| CACGGTGGAGGTAGTAGCTT  | 26462 + | AGG | 33   |
| GGAGGTAGTAGCTTAGGTAA  | 26468 + | AGG | 3    |
| TAGCTTAGGTAAAGGTTTAG  | 26476 + | CGG | 65   |
| AAAGTAATTGCTACAGACTT  | 26510 + | TGG | 100  |
| AGAGGATAGCTCTTTATTA   | 26522 - | AGG | 91   |
| TATACTATCTGTCAAAGTAG  | 26540 - | AGG | 179  |
| CTGTCTATAGAAGTACTTAC  | 26569 - | AGG | 276  |
| CTAATCGTTACATTCACAAT  | 26638 - | AGG | 766  |
| GAATGTAACGATTAGAAATG  | 26662 + | AGG | 22   |
| AATGTAACGATTAGAAATGA  | 26663 + | GGG | 14   |
| GAAGTTTCAACTTATTATAA  | 26736 + | GGG | 49   |
| GTTTCAACTTATTATAAGGG  | 26739 + | AGG | 8    |
| CGCACGATATAGAAGTAATA  | 26777 + | AGG | 135  |
| GATATAGAAGTAATAAGGAA  | 26782 + | TGG | 36   |
| TCCAAGTGATTATAAGTGAA  | 26814 - | AGG | 32   |
| TCCTTCACTTATAATCACT   | 26829 + | TGG | 1071 |
| GTAGTTGAATATAACGTTAC  | 26854 + | AGG | 154  |
| GAATATAACGTTACAGGCGC  | 26860 + | AGG | 30   |
| TCGTAACTATTCTGATATAG  | 26889 + | AGG | 8    |
| CGTAACTATTCTGATATAGA  | 26890 + | GGG | 131  |
| TCTGATATAGAGGGTATTGA  | 26899 + | TGG | 142  |
| AAAAAGTAGAGCTTAAGATA  | 26954 + | AGG | 265  |
| TGTGAAGCATAAGCAATTTT  | 26970 - | AGG | 803  |
| AACGTCCAGCAAATAGTGCT  | 27008 - | TGG | 329  |
| GACGTCCAAGCACTATTTGC  | 27019 + | TGG | 211  |
| TGCTGGACGTTTTTATTTAA  | 27036 + | GGG | 11   |
| TCATACTTAATTGAATTGTC  | 27063 - | TGG | 73   |
| TCAAATGCTTGTGTTGCTTT  | 27102 - | TGG | 443  |
| TTTGAGCTTGATTATGTTGA  | 27136 + | TGG | 67   |
| GATGGACGACAAC TTTTGT  | 27154 + | AGG | 1319 |
| TTTGACACAACACAAACATC  | 27196 + | AGG | 149  |
| TTGACACAACACAAACATCA  | 27197 + | GGG | 1603 |
| TGACACAACACAAACATCAG  | 27198 + | GGG | 133  |

|                       |         |     |     |
|-----------------------|---------|-----|-----|
| ACTTTCAAAGTATGGTAGTT  | 27229 - | CGG | 145 |
| TAACCGACACTTTCAAAGTA  | 27237 - | TGG | 56  |
| CTACCATACTTTGAAAGTGT  | 27250 + | CGG | 117 |
| CAGGTACCGACCATTTTTCA  | 27287 - | GGG | 180 |
| TCAGGTACCGACCATTTTTC  | 27288 - | AGG | 12  |
| GTAATAACGACCCTGAAAAA  | 27293 + | TGG | 6   |
| TAACGACCCTGAAAAATGGT  | 27297 + | CGG | 179 |
| TCGTTTGTAGGCAATCTATC  | 27306 - | AGG | 158 |
| CTCTTATCACCTTCGTTTGT  | 27318 - | AGG | 387 |
| GATAGATTGCCTACAAACGA  | 27325 + | AGG | 83  |
| CTACAAACGAAGGTGATAAG  | 27335 + | AGG | 61  |
| ACATTTTACAACACTAACTC  | 27367 + | AGG | 603 |
| TCAGGAGAAGTTTATTATAA  | 27385 + | CGG | 3   |
| AACTGATTAAACTGTGTAA   | 27399 - | AGG | 69  |
| AGATGTAAAGCTAATGATA   | 27465 + | AGG | 187 |
| GTTAAAGCTAATGATAAGGA  | 27469 + | TGG | 3   |
| TTCACCTTCTATACAGATAA  | 27493 + | AGG | 9   |
| AGGAAATATCTCAGTTATTA  | 27513 + | AGG | 205 |
| AAGGAAGTTGATTTAAAAGC  | 27532 + | CGG | 16  |
| GTCGAAGATTATTTTATCTC  | 27535 - | CGG | 281 |
| GGAGATAAAATAATCTTCGA  | 27553 + | CGG | 6   |
| TATATTTAAATAACCTCTAT  | 27568 - | AGG | 722 |
| GACGGTAAACATACCTATAG  | 27571 + | AGG | 241 |
| TAATAAAACTTTAGAACAAC  | 27615 + | CGG | 185 |
| TCCAGCCTGGATATAAAAC   | 27618 - | CGG | 6   |
| GAACAACCGTTTTATATCC   | 27628 + | AGG | 397 |
| GACTTGAATCGATTCCAGCC  | 27630 - | TGG | 64  |
| AACCGGTTTTATATCCAGGC  | 27632 + | TGG | 83  |
| CACAAATTATTTTTAGATA   | 27700 + | AGG | 49  |
| CTTTTAATAAAAATTGGCAT  | 27712 - | AGG | 130 |
| TGTAGACTTTTTAATAAAAT  | 27718 - | TGG | 22  |
| AATTTTATTA AAAAGTCTAC | 27736 + | AGG | 163 |
| ATTTTATTA AAAAGTCTACA | 27737 + | GGG | 200 |
| TTAAAAAGTCTACAGGGTGT  | 27743 + | AGG | 11  |
| TAAAAAGTCTACAGGGTGTA  | 27744 + | GGG | 93  |
| CGCTATTAATGTTAGTACAA  | 27769 + | AGG | 803 |
| GCTAAATGAAGATAGTTCTT  | 27802 + | TGG | 541 |
| GCGAGTACGTTTGACGCAAT  | 27845 + | AGG | 86  |
| TAGGTGCTATAACTAAAATG  | 27864 + | TGG | 31  |
| TGGACGATCACTCATGTTGA  | 27884 + | AGG | 44  |
| ATACTTGATAAGTCTACTAT  | 27938 + | TGG | 302 |
| TAAGGCTTGATATCAAAGCT  | 27969 + | AGG | 42  |
| GGTAAATCCTAGAATTGTTA  | 27993 - | AGG | 287 |

|                       |         |     |     |
|-----------------------|---------|-----|-----|
| TTGATGACCTTAACAATTCT  | 28002 + | AGG | 86  |
| TAAAACCTTTCGTTATACTCT | 28014 - | TGG | 685 |
| GAGTATAACGAAAAGTTTTAC | 28034 + | AGG | 1   |
| TTCTTCAACTGTCTTTAA    | 28064 + | AGG | 100 |
| CAATACTGTCTTTAAAGGAA  | 28069 + | CGG | 11  |
| AATACTGTCTTTAAAGGAAC  | 28070 + | GGG | 16  |
| AATTTAGATGCATCTACTTT  | 28096 - | TGG | 403 |
| AGTAGATGCATCTAAATTCG  | 28117 + | AGG | 9   |
| GTAGATGCATCTAAATTCGA  | 28118 + | GGG | 13  |
| GCATCTAAATTCGAGGGATT  | 28124 + | AGG | 54  |
| AAATTCGAGGGATTAGGCAA  | 28130 + | AGG | 1   |
| CGATTAGAAATCTTTAAAAA  | 28160 + | AGG | 102 |
| ACCAGCTTTAATGTAATAAT  | 28247 - | TGG | 36  |
| GCCAATTATTACATTAAGC   | 28262 + | TGG | 10  |
| ATCACCATAACCTTTAATAA  | 28319 - | AGG | 71  |
| AAATGTTATACCTTTATTAA  | 28325 + | AGG | 19  |
| TATACCTTTATTAAGGTTA   | 28331 + | TGG | 1   |
| ACAACAGACTTTTGCAGAAG  | 28366 + | CGG | 9   |
| CAACAGACTTTTGCAGAAGC  | 28367 + | GGG | 158 |
| TTACCTATCAATTGTGCTAA  | 28396 - | TGG | 17  |
| CATCCATTAGCACAAATTGAT | 28409 + | AGG | 287 |
| ATACGTCCATCAACAAGCGG  | 28429 - | TGG | 306 |
| TTAATACGTCCATCAACAAG  | 28432 - | CGG | 652 |
| GAAGCGCCACCGCTTGTTGA  | 28439 + | TGG | 237 |
| AGATAGTTTAAAAAAGCAA   | 28477 + | TGG | 24  |
| ACGTAACGCTACAAAGTCTA  | 28520 - | AGG | 695 |
| CTATTTTAGGGTTAGCTTCT  | 28551 - | GGG | 174 |
| CCTATTTTAGGGTTAGCTTC  | 28552 - | TGG | 2   |
| TAACAACATCACCTATTTTA  | 28563 - | GGG | 369 |
| CTAACAACATCACCTATTTT  | 28564 - | AGG | 251 |
| CCAGAAGCTAACCTAAAAT   | 28568 + | AGG | 2   |
| AATAGGTGATGTTGTTAGAG  | 28585 + | TGG | 30  |
| AGGTGATGTTGTTAGAGTGG  | 28588 + | TGG | 2   |
| CACTAAGTCGTTATATCCTA  | 28601 - | TGG | 177 |
| AGAGTGGTGGATTCTGCCAT  | 28601 + | AGG | 13  |
| ACTAAGCAAGATGTAGTATT  | 28685 + | AGG | 566 |
| TAGTATTAGGAGACTTTACA  | 28698 + | AGG | 368 |
| TTTTAGTTCTTTAGATGGGT  | 28772 - | CGG | 6   |
| ATGCTTTTAGTTCTTTAGAT  | 28776 - | GGG | 196 |
| AATGCTTTTAGTTCTTTAGA  | 28777 - | TGG | 21  |
| TTTATCTATAAATAATGAAT  | 28837 + | TGG | 1   |
| AAAACAGTTACAACCTGCTAA | 28907 + | TGG | 237 |
| ATCAAATCAATTGGAACGAT  | 28973 + | TGG | 202 |

|                      |         |     |      |
|----------------------|---------|-----|------|
| ATTGGCGACTCTGTAGCTAG | 28991 + | AGG | 10   |
| TTGGCGACTCTGTAGCTAGA | 28992 + | GGG | 20   |
| ACTAATTTACAGAAATGTT  | 29027 + | AGG | 11   |
| AAAACGACTAATCTTGCAAG | 29066 + | AGG | 10   |
| ACGACTAATCTTGCAAGAGG | 29069 + | TGG | 37   |
| TGCAAGAGGTGGCGCAACAA | 29080 + | TGG | 60   |
| TCTACCGCTTCTTTACCTAT | 29095 - | TGG | 290  |
| ACAATGGCAACAGTTCCAAT | 29096 + | AGG | 128  |
| AGTTCCAATAGGTAAAGAAG | 29107 + | CGG | 4    |
| AGACAAGCAGAGCAAATAAG | 29147 + | AGG | 7    |
| CAGTGCCTTGTAATATGATT | 29157 - | AGG | 190  |
| GGAGACCTAATCATATTACA | 29168 + | AGG | 51   |
| TACAAGGCACTGATGATGAT | 29184 + | TGG | 201  |
| ACTGATGATGATTGGTTACA | 29192 + | CGG | 44   |
| ATGATTGGTTACACGGTTAT | 29199 + | TGG | 64   |
| TGATTGGTTACACGGTTATT | 29200 + | GGG | 227  |
| TGGTTACACGGTTATTGGGC | 29204 + | AGG | 117  |
| TCCGTTTTATCAGTGCCTAT | 29215 - | CGG | 1724 |
| TATTGGGCAGGCGTACCGAT | 29216 + | AGG | 137  |
| ACCGATAGGCACTGATAAAA | 29230 + | CGG | 24   |
| ACGGATACAAAACGTTTTA  | 29249 + | CGG | 1    |
| AACTTCAATTGCAGAACAAA | 29258 - | AGG | 364  |
| ATCACTAGTATTTTTGAATC | 29296 - | TGG | 22   |
| GTATTGTTGTACCACTCATA | 29337 - | GGG | 186  |
| CGTATTGTTGTACCACTCAT | 29338 - | AGG | 77   |
| ACAAGACAATGCCCTATGAG | 29342 + | TGG | 211  |
| TGTTTTTGCCGTGTCTTTA  | 29361 - | CGG | 475  |
| AACAATACGCCGTAAAGACA | 29368 + | CGG | 492  |
| GACACGGACAAAACAAACT  | 29384 + | AGG | 8    |
| ACACGGACAAAACAAACTA  | 29385 + | GGG | 35   |
| CAAACAGGGTTAACACTTG  | 29398 + | AGG | 85   |
| GTGTGATATGCGTCAAACAC | 29449 - | TGG | 214  |
| TTCCTAAAAGCTGGATTGTA | 29485 - | TGG | 178  |
| AGCCATACAATCCAGCTTTT | 29499 + | AGG | 68   |
| AGCTTTTAGGAAAGCGAGCA | 29512 + | TGG | 113  |
| TTTTAGGAAAGCGAGCATGG | 29515 + | AGG | 18   |
| AGGAAAGCGAGCATGGAGGA | 29519 + | CGG | 76   |
| CCTCGTGACCTTTTTCGTTA | 29532 - | GGG | 8    |
| ACCTCGTGACCTTTTTCGTT | 29533 - | AGG | 68   |
| GGCTTACACCCTAACGAAAA | 29540 + | AGG | 9    |
| CCCTAACGAAAAAGGTCACG | 29548 + | AGG | 11   |
| TATTATGTACGAGTTAATCA | 29572 + | AGG | 44   |
| ATTACAGTTTTTACGACTAA | 29598 + | AGG | 73   |

|                       |         |     |      |
|-----------------------|---------|-----|------|
| ACAGTTTTTACGACTAAAGG  | 29601 + | AGG | 22   |
| GTAATTAATCCGTAAGCCAT  | 29611 - | TGG | 733  |
| CGACTAAAGGAGGCAACCAA  | 29611 + | TGG | 148  |
| AGGAGGCAACCAATGGCTTA  | 29618 + | CGG | 359  |
| ACAAGTTTACATTCAATGAC  | 29648 + | AGG | 383  |
| GTTTACATTCAATGACAGGT  | 29652 + | CGG | 108  |
| AACTATCGCTTGTAGATGA   | 29699 + | AGG | 175  |
| CGTATATTTCTTCTTTTTGA  | 29736 - | TGG | 302  |
| GATTATTTAACGTATTTAAA  | 29819 + | TGG | 14   |
| CTAGAATCATATTGCTAAAA  | 29826 - | CGG | 9    |
| CGTTTTAGCAATATGATTCT  | 29843 + | AGG | 164  |
| CATTGATACCGTCGCCGTTA  | 29850 - | TGG | 298  |
| AATATGATTCTAGGCCATAA  | 29852 + | CGG | 97   |
| ATTCTAGGCCATAACGGCGA  | 29858 + | CGG | 50   |
| GACGCGCGTATTGATAATAC  | 29897 + | AGG | 28   |
| CGTATTGATAATACAGGTTA  | 29903 + | TGG | 195  |
| ACTAGATGCTTTCACTAAAA  | 29968 + | AGG | 155  |
| CTTGCTCTTTTGGTTCGAAT  | 30024 - | CGG | 94   |
| AATCCGGTTCTTGCTCTTT   | 30034 - | TGG | 20   |
| CGAACCAAAAAGAGCAAGAAC | 30046 + | CGG | 6    |
| GATAAATCAGTGATAAATTC  | 30049 - | CGG | 35   |
| TGCATTACTGCATTTGTATA  | 30073 - | TGG | 91   |
| ATGCAGTAATGCAATCATTT  | 30099 + | TGG | 40   |
| TGCAGTAATGCAATCATTTT  | 30100 + | GGG | 792  |
| TATAAATAATTTTCGTTCTA  | 30111 - | GGG | 72   |
| ATATAAATAATTTTCGTTCT  | 30112 - | AGG | 278  |
| TATATGACGCAAGCTCGTCC  | 30146 + | AGG | 3016 |
| GATAACATGTAATGATTACC  | 30148 - | TGG | 365  |
| CTATCAATAAATTGTCCGTT  | 30181 - | GGG | 148  |
| TCTATCAATAAATTGTCCGT  | 30182 - | TGG | 111  |
| TTATCTAGATTGAAGCCCAA  | 30182 + | CGG | 108  |
| GATAGATTGCTTGTTAAAAA  | 30215 + | CGG | 54   |
| AGATTGCTTGTTAAAAACGG  | 30218 + | CGG | 15   |
| AATGCGTATAGATACATTGA  | 30254 + | TGG | 4    |
| GATACATTGATGGAGAATTA  | 30264 + | TGG | 20   |
| ATGGATTTATTTCAGCTGTAT | 30283 + | TGG | 211  |
| TTATTTCTCCAGTTCTATAT  | 30321 - | TGG | 505  |
| GTACGTTTCCAATATAGAAC  | 30329 + | TGG | 5    |
| AGAAGTGGAGAAATAACTTA  | 30344 + | TGG | 150  |
| TATCTGTCGTTAAATATATT  | 30373 - | CGG | 330  |
| TACGTCAGCGATTTATAATC  | 30412 + | CGG | 209  |
| AAAATCATTAATTTTCTAC   | 30415 - | CGG | 20   |
| TTCTAAAGTTGTCTTTCAGT  | 30454 - | GGG | 1049 |

|                       |         |     |      |
|-----------------------|---------|-----|------|
| ATTCTTAAGTTGTCTTTTCAG | 30455 - | TGG | 254  |
| GAATTCGTTGAACTTTGTTG  | 30490 + | AGG | 28   |
| AGTGCTGACGATATTGATAA  | 30518 + | AGG | 18   |
| AGACAAAGTATTGTATCAAA  | 30544 + | TGG | 41   |
| GTATCTGAAGTGTATTCCAT  | 30556 - | AGG | 40   |
| GTATCAAATGGATATACCTA  | 30556 + | TGG | 20   |
| TCATAAGTGATACCTTGCA   | 30583 - | AGG | 124  |
| TCAGATACACAACCTATGCA  | 30587 + | AGG | 365  |
| CAAGGTATCACTTATGATGC  | 30605 + | AGG | 49   |
| ATGATGCAGGTATCTTATAT  | 30618 + | TGG | 240  |
| GGTATCTTATATTGGTATAC  | 30626 + | AGG | 3    |
| ACCTTGTAAGTAGTTAGGGT  | 30647 - | TGG | 116  |
| CGAAACCTTGTAAGTAGTTA  | 30651 - | GGG | 31   |
| TCGAAACCTTGTAAGTAGTT  | 30652 - | AGG | 83   |
| GCCAACCCTAACTACTTACA  | 30662 + | AGG | 119  |
| TTTAAACGACGTATCGATAT  | 30713 + | TGG | 1456 |
| AAACGACGTATCGATATTGG  | 30716 + | CGG | 40   |
| AGGAGACTTCCAAGAAGCTG  | 30757 + | AGG | 20   |
| GGAGACTTCCAAGAAGCTGA  | 30758 + | GGG | 27   |
| ATGTATTACGATCTAGAAAC  | 30788 + | AGG | 5    |
| GGACGCAAAGCGCTTTTAAT  | 30809 + | AGG | 94   |
| GACGCAAAGCGCTTTTAATA  | 30810 + | GGG | 151  |
| ACGCAAAGCGCTTTTAATAG  | 30811 + | GGG | 54   |
| CTTTAATAGGGGTA ACTAT  | 30821 + | TGG | 98   |
| ATAGGGGTA ACTATTGGACC | 30827 + | TGG | 79   |
| GAGTGATGTCTGTTGTTACC  | 30829 - | AGG | 802  |
| CATCACTCAATTTATTCCAT  | 30860 + | CGG | 60   |
| GTTAACACCTCTTTGGCCGA  | 30860 - | TGG | 29   |
| AGAATTGGTTAACACCTCTT  | 30867 - | TGG | 258  |
| ATTTATTCCATCGGCCAAAG  | 30869 + | AGG | 17   |
| GTGCAATGTTTTTTAAGAAT  | 30882 - | TGG | 24   |
| GAATCAGTCATCGATACTTG  | 30904 - | AGG | 21   |
| CAAGTATCGATGACTGATTC  | 30923 + | AGG | 307  |
| GTATCGATGACTGATTCAGG  | 30926 + | CGG | 37   |
| GCTGGGTTCTGTATTGGTAA  | 30943 - | CGG | 10   |
| AGATATGCTGGGTTCTGTAT  | 30949 - | TGG | 240  |
| TAATATCACTTAGATATGCT  | 30960 - | GGG | 356  |
| GTAATATCACTTAGATATGC  | 30961 - | TGG | 59   |
| AGCATATCTAAGTGATATTA  | 30979 + | CGG | 12   |
| CTAAGTGATATTACGGAAGT  | 30986 + | TGG | 9    |
| CTCTAAACGCTTTCGGTAA   | 31038 - | GGG | 57   |
| TCTCTAAACGCTTTCGGTAA  | 31039 - | CGG | 2    |
| CCTGCATCTCTAAACGCTTT  | 31045 - | CGG | 486  |



|                       |         |     |      |
|-----------------------|---------|-----|------|
| CCGAAAGCGTTTAGAGATGC  | 31061 + | AGG | 832  |
| TGGTTCTTTGATGTACTGCC  | 31085 + | TGG | 300  |
| AGAGCACCATTATAGTGTC   | 31087 - | AGG | 180  |
| GTACTGCCTGGACACTATAA  | 31097 + | TGG | 31   |
| ATTTCTACCTGTGCTGTTTC  | 31124 - | TGG | 291  |
| GTACTTACCAGAAACAGCAC  | 31133 + | AGG | 50   |
| ATTTTCAATAAGAAAAACAA  | 31190 + | CGG | 5    |
| ATAAGAAAAACAACGGAGCA  | 31197 + | TGG | 82   |
| TCCAATAACCGCGTTTTG    | 31213 - | CGG | 1    |
| AATTTCTGTCCGAAAACGC   | 31220 + | CGG | 148  |
| AGGGATATGTTCCAATAAC   | 31223 - | CGG | 27   |
| GTCCGCAAACGCCGTTAT    | 31227 + | TGG | 106  |
| ATAATTTTGTAAATATTCTTA | 31242 - | GGG | 94   |
| GATAATTTTGTAAATATTCTT | 31243 - | AGG | 100  |
| TTATCAGATTTAAAAATCGT  | 31277 + | TGG | 204  |
| GCAATACCTTTAAAGTCTTT  | 31333 - | AGG | 109  |
| GATTTTCCTAAAGACTTTAA  | 31343 + | AGG | 57   |
| AAAGACTTTAAAGGTATTGC  | 31352 + | AGG | 86   |
| ACTTTAAAGGTATTGCAGGT  | 31356 + | TGG | 75   |
| AGAAGTAAAATCGAATACAC  | 31384 + | CGG | 23   |
| GAAGTAAAATCGAATACACC  | 31385 + | GGG | 1105 |
| AATACTTGTGTTGTGTTACC  | 31387 - | CGG | 350  |
| CTAAAAATTGATGTGCAGAC  | 31425 - | GGG | 720  |
| ACTAAAAATTGATGTGCAGA  | 31426 - | CGG | 92   |
| CAATTTTTAGTTAGAAACTT  | 31454 + | TGG | 5    |
| TTAGTTAGAACTTTGGTAC   | 31460 + | TGG | 39   |
| AACTTTGGTACTGGTGGCGT  | 31469 + | TGG | 78   |
| GTACTGGTGGCGTTGGTAAA  | 31476 + | TGG | 37   |
| TGGTAAATGGAGTTTATTCG  | 31489 + | AGG | 24   |
| GGTAAATGGAGTTTATTCGA  | 31490 + | GGG | 11   |
| ATGGAGTTTATTCGAGGGAA  | 31495 + | AGG | 2    |
| GAGTTTATTCGAGGGAAAGG  | 31498 + | TGG | 104  |
| CTGATGTTTGTGTCAATAAT  | 31578 - | TGG | 93   |
| AGTTTCTATGAATCAGATAG  | 31615 + | AGG | 72   |
| TATGAATCAGATAGAGGAAC  | 31621 + | TGG | 40   |
| TGTTCAGAACTTATAGATAA  | 31662 - | CGG | 251  |
| TCTATCTACGTTATAATCAT  | 31711 - | CGG | 60   |
| GATGATTATAACGTAGATAG  | 31729 + | AGG | 209  |
| ACGATAGTAGACGCAATTAA  | 31774 + | TGG | 103  |
| CGATAGTAGACGCAATTAAT  | 31775 + | GGG | 1262 |
| GAATGTTTTAAAAATTCATT  | 31800 - | CGG | 272  |
| AATGAATTTTTAAAAACATTC | 31819 + | AGG | 79   |
| ATTTTTAAAACATTCAGGCA  | 31824 + | AGG | 437  |

|                      |         |     |      |
|----------------------|---------|-----|------|
| TTCAGGCAAGGTGCATGCTC | 31836 + | AGG | 260  |
| CAGGCATTCTTTACACAAAA | 31855 + | CGG | 7    |
| AGGCATTCTTTACACAAAAC | 31856 + | GGG | 69   |
| ATTGAAAATGATTTAGTTAG | 31918 + | TGG | 63   |
| TTGAAAATGATTTAGTTAGT | 31919 + | GGG | 66   |
| GATTTAGTTAGTGGGTTTGA | 31927 + | TGG | 56   |
| CAGCCATATTTTGCTTTAAT | 32000 - | TGG | 1003 |
| TAACCAATTAAGCAAAATA  | 32013 + | TGG | 8    |
| GTGAATGATAGTGCGACAAA | 32062 + | AGG | 78   |
| GAAGTTGAACAACAAATCAA | 32221 + | TGG | 130  |
| TTGTTGAATTACCTTTAACA | 32234 - | AGG | 361  |
| AATGGCGCTGACCTTGTTAA | 32239 + | AGG | 72   |
| AAGGTAATTCAACAACAAAT | 32258 + | TGG | 77   |
| TCTAAACTTACAGATGATTA | 32287 + | CGG | 297  |
| TGCGCTTAAAACGCTATCTA | 32320 - | TGG | 32   |
| TAAGCGCAGTTAACACATCT | 32351 + | AGG | 176  |
| GTGCCTATATCCGTCTTTTC | 32388 - | TGG | 85   |
| AACAGATGCGCCAGAAAAGA | 32394 + | CGG | 43   |
| GCGCCAGAAAAGACGGATAT | 32401 + | AGG | 40   |
| ATAGGCACGTTAGAGAAGCC | 32419 + | TGG | 20   |
| TCATCAACACCATCTTGTC  | 32421 - | AGG | 544  |
| TTAGAGAAGCCTGGACAAGA | 32428 + | TGG | 29   |
| GGACAAGATGGTGTTGATGA | 32440 + | CGG | 21   |
| ACTTATACATCAAGCAAATC | 32482 + | TGG | 259  |
| ATAATACTGCTCGTGCAACA | 32531 + | TGG | 1145 |
| ACTCATCGTTTGAATCGTCT | 32540 - | GGG | 3005 |
| TACTCATCGTTTGAATCGTC | 32541 - | TGG | 558  |
| TACACAAAATACAAAATCTA | 32578 + | CGG | 1126 |
| AATACAAAATCTACGGCACA | 32585 + | TGG | 1549 |
| CATCATTCTTTTTATAAAAC | 32594 - | GGG | 207  |
| CCATCATTCTTTTTATAAAA | 32595 - | CGG | 51   |
| CCGTTTTATAAAAAGAATGA | 32611 + | TGG | 8    |
| CAGTATGTAGATGATAAATT | 32692 + | CGG | 4    |
| ATAAATTCGGAACAACGAGC | 32705 + | TGG | 345  |
| GCAACAACATAAGATGACAG | 32727 + | AGG | 101  |
| CATAAGATGACAGAGGCGAA | 32734 + | TGG | 51   |
| GTTAACCTAAATAATGCGCA | 32770 + | AGG | 53   |
| AATAATGCGCAAGGCGATTT | 32779 + | GGG | 34   |
| TTACTATGCAACAAGAGTGC | 32820 + | CGG | 23   |
| TCAACGCTACCTGGTAAATC | 32823 - | CGG | 35   |
| ACAAGAGTGCCGATTTACC  | 32830 + | AGG | 296  |
| TCATAACTTTCAACGCTACC | 32832 - | TGG | 1270 |
| AGGTAGCGTTGAAAGTTATG | 32850 + | AGG | 82   |

|                       |         |     |      |
|-----------------------|---------|-----|------|
| GGTAGCGTTGAAAGTTATGA  | 32851 + | GGG | 5    |
| AAGTTATGAGGGTATTTAT   | 32862 + | CGG | 109  |
| TAAATCTTTTTAGAGTTATA  | 32910 - | AGG | 179  |
| TACACACGATCAATCACAAA  | 32947 + | CGG | 1749 |
| ACGGCAGACTTGAGCAACAG  | 32966 + | TGG | 17   |
| ACCGTTGATTTATGTTTCATT | 32979 - | AGG | 110  |
| TCCTAATGAACATAAATCAA  | 32994 + | CGG | 243  |
| TCAACGGTATTGTTTCGACGG | 33010 + | TGG | 32   |
| TTGTTTCGACGGTGGCGCAA  | 33019 + | TGG | 3    |
| GACGGTGGCGCAAATGGTGT  | 33025 + | AGG | 50   |
| AAAATAGAATAGTTTGTGTA  | 33054 - | CGG | 43   |
| TATTCTATTTTGTGGTAAG   | 33082 + | TGG | 2    |
| TTGGTAAGTGGAACCTATCC  | 33094 + | AGG | 417  |
| AATCCCTCAATAACGCCACC  | 33096 - | TGG | 478  |
| GTAAGTGGAACCTATCCAGG  | 33097 + | TGG | 19   |
| TTATCCAGGTGGCGTTATTG  | 33108 + | AGG | 3    |
| TATCCAGGTGGCGTTATTGA  | 33109 + | GGG | 19   |
| GGTGGCGTTATTGAGGGATT  | 33115 + | CGG | 3    |
| TTGAATCGCGTTAGGTAATG  | 33127 - | CGG | 56   |
| TTACTCAATTGAATCGCGTT  | 33135 - | AGG | 258  |
| GCGAATGTAGTTGACTCAGA  | 33175 + | CGG | 157  |
| GTAGTTGACTCAGACGGCAA  | 33181 + | CGG | 48   |
| GTTGACTCAGACGGCAACGG  | 33184 + | TGG | 100  |
| TAAAGTAGTGCTACTTGTTT  | 33214 - | TGG | 208  |
| TTAGGTAAAACATCAGGTTC  | 33280 + | TGG | 100  |
| TTAGTTATAGTAACTTTGT   | 33295 - | TGG | 550  |
| AGTTACTATAACTAAAATTA  | 33318 + | TGG | 12   |
| GTTACTATAACTAAAATTAT  | 33319 + | GGG | 18   |
| TTACTATAACTAAAATTATG  | 33320 + | GGG | 290  |
| AACGATAAAAACGAAGTTAT  | 33366 + | CGG | 52   |
| ATCGGATTCGTTAATACTGG  | 33384 + | CGG | 48   |
| AACTCTTCTTTAAATTTAAT  | 33428 - | AGG | 346  |
| TTAGTGAAAACAACTTTCT   | 33455 - | AGG | 470  |
| AGAAAGTTTGTTTTCACTAA  | 33474 + | CGG | 196  |
| CTTTGTTGGTTTGATGCATT  | 33521 - | CGG | 1211 |
| TTAAATCTGACGCACTTTGT  | 33535 - | TGG | 208  |
| TGCGTCAGATTTAAGTGATG  | 33560 + | AGG | 13   |
| TGATGAGGAACTTCGCGGAA  | 33575 + | TGG | 130  |
| TGTTTTGTTAGTTTTCAGTT  | 33669 - | CGG | 76   |
| AACTAACAAAACAAATACTG  | 33695 + | AGG | 364  |
| ACTAACAAAACAAATACTGA  | 33696 + | GGG | 280  |
| CTAACAAAACAAATACTGAG  | 33697 + | GGG | 561  |
| TAACAAAACAAATACTGAGG  | 33698 + | GGG | 38   |

|                        |         |     |      |
|------------------------|---------|-----|------|
| GTTTTAATGTCTTTAAAAGT   | 33731 - | TGG | 185  |
| ACATTA AAACTTTTTATGTG  | 33760 + | TGG | 23   |
| CATTA AAACTTTTTATGTGT  | 33761 + | GGG | 189  |
| ATAAAAATGAGCAAATTAAG   | 33790 + | TGG | 80   |
| AATTAAGTGGTACGTAGACA   | 33803 + | TGG | 112  |
| ATTAAGTGGTACGTAGACAT   | 33804 + | GGG | 420  |
| GAAGAATATGCATTGATCAC   | 33840 + | TGG | 9    |
| GACTTTTCATCTTTTGCCTC   | 33857 - | TGG | 76   |
| CACTGGTGAAAAATATCCAG   | 33857 + | AGG | 20   |
| GGCAAAAGATGAAAAGTCAC   | 33878 + | AGG | 564  |
| AGTCACAGGTGTAATGCTTG   | 33892 + | AGG | 18   |
| TTTTTAATTTAACACAAAAGT  | 33916 + | AGG | 56   |
| AAAGTAGGTGGCGTAATGTT   | 33931 + | TGG | 2    |
| CCATTCATGTTTCGTGCCGTT  | 33943 - | TGG | 1689 |
| TAATGTTTGGATTTACCAA    | 33944 + | CGG | 276  |
| CCAAACGGCACGAACATGAA   | 33959 + | TGG | 31   |
| ACTCTCAATGAGATTA AATT  | 34024 + | AGG | 226  |
| CGTCTATCTGTCTTTCCCTC   | 34085 - | TGG | 3608 |
| ATATACGCGATATGAAAATG   | 34151 + | TGG | 6    |
| GATATGAAAATGTGGATTCT   | 34159 + | CGG | 285  |
| ATGTGGATTCTCGGTTTGAT   | 34168 + | AGG | 15   |
| TGTGGATTCTCGGTTTGATA   | 34169 + | GGG | 177  |
| GCTTTACTAAGA AACTATTTT | 34216 + | TGG | 132  |
| GA ACTATTTTTGGTATTTAA  | 34226 + | AGG | 8    |
| CTATTTTTGGTATTTAAAGG   | 34229 + | AGG | 8    |
| TCCTAAAATCCCTTTAAGCA   | 34242 - | TGG | 1140 |
| GAGGTGATTACCATGCTTAA   | 34248 + | AGG | 3    |
| AGGTGATTACCATGCTTAAA   | 34249 + | GGG | 13   |
| ACCATGCTTAAAGGGATTTT   | 34257 + | AGG | 22   |
| GGATTTTAGGATATAGCTTC   | 34270 + | TGG | 32   |
| GATTTTAGGATATAGCTTCT   | 34271 + | GGG | 136  |
| ATAGCTTCTGGGCGTGCTTC   | 34282 + | TGG | 40   |
| TTCTGGGCGTGCTTCTGGTT   | 34287 + | TGG | 89   |
| ACAGTTAAGAGTCAGTGCTT   | 34322 + | CGG | 210  |
| AAGAGTCAGTGCTTCGGCAC   | 34328 + | TGG | 131  |
| ATTGAAATGAGGTGCATACA   | 34363 + | TGG | 100  |
| TTGAAATGAGGTGCATACAT   | 34364 + | GGG | 388  |
| CTGTAGGCTTTCTAGTCTTT   | 34380 - | GGG | 87   |
| GCTGTAGGCTTTCTAGTCTT   | 34381 - | TGG | 31   |
| AAAGCCTACAGCTAGTGAAG   | 34408 + | TGG | 10   |
| GCCTACAGCTAGTGAAGTGG   | 34411 + | TGG | 22   |
| CAGCTAGTGAAGTGGTGGAG   | 34416 + | TGG | 3    |
| AGCTAGTGAAGTGGTGGAGT   | 34417 + | GGG | 48   |

|                       |         |     |      |
|-----------------------|---------|-----|------|
| GAGTGGGCAAAGTCGAATAT  | 34433 + | TGG | 226  |
| CAAAGTCGAATATTGGTAAG  | 34440 + | AGG | 65   |
| GATTAATATAGATAATTATC  | 34462 + | GGG | 4    |
| ATTAATATAGATAATTATCG  | 34463 + | GGG | 493  |
| ATTATCGGGGCAGTCAATGT  | 34476 + | TGG | 128  |
| TTATCGGGGCAGTCAATGTT  | 34477 + | GGG | 64   |
| ACTTTATTTTTAAAAGATAT  | 34509 + | TGG | 4    |
| CTTTATTTTTAAAAGATATT  | 34510 + | GGG | 7    |
| TTTATTTTTAAAAGATATTG  | 34511 + | GGG | 2    |
| GATATTGGGGTTTTGTAACA  | 34524 + | TGG | 23   |
| ATATTGGGGTTTTGTAACAT  | 34525 + | GGG | 4    |
| TATTGGGGTTTTGTAACATG  | 34526 + | GGG | 85   |
| TGTAACATGGGGCAATGCTA  | 34537 + | AGG | 86   |
| ATGGGGCAATGCTAAGGATA  | 34543 + | TGG | 54   |
| CGATAGAATCGGAAACCCTT  | 34564 - | AGG | 1399 |
| GGCTAATTACAGATATCCTA  | 34564 + | AGG | 373  |
| GCTAATTACAGATATCCTAA  | 34565 + | GGG | 230  |
| CAGATGAATAACGATAGAAT  | 34575 - | CGG | 369  |
| CGATTCTATCGTTATTCATC  | 34592 + | TGG | 82   |
| TTATTCATCTGGATTTGTAC  | 34603 + | CGG | 29   |
| ACTGCGATGTCTCCAGGTTT  | 34606 - | CGG | 70   |
| TCTGGATTTGTACCGGAACC  | 34610 + | TGG | 35   |
| AACCTGGAGACATCGCAGTT  | 34626 + | TGG | 136  |
| GACATCGCAGTTTGGCACCC  | 34634 + | TGG | 510  |
| CCGAACCTATTCCGTTGCCA  | 34635 - | GGG | 181  |
| TCCGAACCTATTCCGTTGCC  | 34636 - | AGG | 155  |
| GCAGTTTGGCACCCCTGGCAA | 34640 + | CGG | 86   |
| TGGCACCCCTGGCAACGGAAT | 34646 + | AGG | 67   |
| CCCTGGCAACGGAATAGGTT  | 34651 + | CGG | 41   |
| GGCAACGGAATAGGTTCGGA  | 34655 + | CGG | 3    |
| AGATGGTCCACTACTATTG   | 34667 - | CGG | 284  |
| GGACACACCGCAATAGTAGT  | 34676 + | AGG | 152  |
| TAAAAATAACTTTTATTAGA  | 34684 - | TGG | 58   |
| TATTAGAATTAACCCAGTTT  | 34716 - | TGG | 242  |
| TTTATAGCGTTGACCAAAAC  | 34719 + | TGG | 26   |
| TTATAGCGTTGACCAAAACT  | 34720 + | GGG | 273  |
| ACTGGGTTAATTCTAATAGT  | 34737 + | TGG | 70   |
| TAATAGTTGGACAGGTTCTC  | 34750 + | CGG | 15   |
| AATAGTTGGACAGGTTCTCC  | 34751 + | GGG | 472  |
| GGGTGTCTTACTAAACTTCC  | 34753 - | CGG | 125  |
| AGCCTGTAACACTTACATAA  | 34773 - | GGG | 604  |
| AAGCCTGTAACACTTACATA  | 34774 - | AGG | 141  |
| CTAGTATCTTTTGAATATGG  | 34804 - | AGG | 24   |

|                       |         |     |      |
|-----------------------|---------|-----|------|
| TTGCTAGTATCTTTTGAATA  | 34807 - | TGG | 8    |
| GAAC TTGTATCAGTACTACT | 34831 - | AGG | 1129 |
| GCCAGTAATTGTTGAGTCAT  | 34865 - | TGG | 458  |
| GCCAATGACTCAACAATTAC  | 34880 + | TGG | 349  |
| GTTTTAACTTCTTTAAATTG  | 34900 - | CGG | 4    |
| CATTGATCATATAGTTGTAA  | 34987 + | TGG | 189  |
| ATTGATCATATAGTTGTAAT  | 34988 + | GGG | 979  |
| GATGAACGCTCAGATATTCA  | 35012 + | AGG | 559  |
| TCTCTATCGACATATAAATG  | 35104 - | CGG | 109  |
| GCATTTATATGTCGATAGAG  | 35122 + | AGG | 28   |
| ATGTCGATAGAGAGGCTACA  | 35130 + | TGG | 23   |
| GTGACGCGGGTCATCAAAT   | 35150 - | TGG | 38   |
| CTAGCCAATTAGGGTGACGC  | 35163 - | GGG | 202  |
| ACTAGCCAATTAGGGTGACG  | 35164 - | CGG | 65   |
| CTTCAATAACTAGCCAATTA  | 35172 - | GGG | 68   |
| ACTTCAATAACTAGCCAATT  | 35173 - | AGG | 18   |
| ATGACCCGCGTCCACCTAAT  | 35175 + | TGG | 117  |
| TGGCTAGTTATTGAAGTATG  | 35195 + | TGG | 29   |
| CAAATACAAGCGTTAATACG  | 35255 + | TGG | 1534 |
| AAGCGTTAATACGTGGTGTT  | 35262 + | TGG | 983  |
| CGTGGTGTTTGGTTATTGTC  | 35273 + | AGG | 28   |
| GTGGTGTTTGGTTATTGTCA  | 35274 + | GGG | 43   |
| CTTATCTGAAACGACGTTAA  | 35308 + | AGG | 416  |
| TCATACTACGCCAAATATTA  | 35319 - | GGG | 242  |
| TTCATACTACGCCAAATATT  | 35320 - | AGG | 784  |
| TAAAGGTAGACCCTAATATT  | 35325 + | TGG | 260  |
| AATTACGACTTGATTAAGCA  | 35369 + | AGG | 69   |
| CTTGATTAAGCAAGGTATAC  | 35377 + | CGG | 711  |
| TGCTCATACTTTCGTTATC   | 35380 - | CGG | 385  |
| TGATGGAGTAGGGCCTCGTG  | 35525 - | TGG | 81   |
| GTTGACAGTGCGTCCACACG  | 35528 + | AGG | 47   |
| GTTTTTCGTCTGATGGAGTA  | 35535 - | GGG | 109  |
| GGTTTTTCGTCTGATGGAGT  | 35536 - | AGG | 84   |
| ATGCTTGGTTTTTCGTCTGA  | 35542 - | TGG | 14   |
| CTTGTTTCAGTAACGATGCT  | 35557 - | TGG | 357  |
| AGTGCTTGCTGGAATGTGAA  | 35581 - | TGG | 8    |
| TTTGTCTATCCAGTGCTTGC  | 35592 - | TGG | 1320 |
| ATTCACATTCCAGCAAGCAC  | 35599 + | TGG | 813  |
| CACTGGATAGACAAATGTCT  | 35616 + | AGG | 337  |
| ACTGGATAGACAAATGTCTA  | 35617 + | GGG | 114  |
| CTGGATAGACAAATGTCTAG  | 35618 + | GGG | 895  |
| CCCATGTATGAGATTTTTTC  | 35628 - | GGG | 35   |
| CCCATGTATGAGATTTTTT   | 35629 - | CGG | 1    |

|                       |         |     |      |
|-----------------------|---------|-----|------|
| ACCCGAAAAAATCTCATACA  | 35643 + | TGG | 3    |
| CCCGAAAAAATCTCATACAT  | 35644 + | GGG | 5    |
| CCGAAAAAATCTCATACATG  | 35645 + | GGG | 19   |
| AAAAATCTCATACATGGGGC  | 35649 + | TGG | 6    |
| AAAATCTCATACATGGGGCT  | 35650 + | GGG | 95   |
| AACACGAGCACAAACGAGCT  | 35680 + | CGG | 837  |
| CAATGAATGTTAAGCGAATA  | 35703 + | TGG | 87   |
| AATGAATGTTAAGCGAATAT  | 35704 + | GGG | 351  |
| TGCTATCAAATGCTTAATTT  | 35741 + | AGG | 377  |
| CTTAATTTAGGCAAGTATCA  | 35753 + | AGG | 223  |
| GCGCTTAACAAAATACTTAA  | 35789 + | AGG | 32   |
| AACAAAATACTTAAAGGAAA  | 35795 + | AGG | 13   |
| AAAGGAAAAGGAACGCTCGA  | 35807 + | CGG | 11   |
| AAAGGAACGCTCGACGGACA  | 35813 + | AGG | 195  |
| CGGACAAGGCAAAGCATTCG  | 35827 + | CGG | 876  |
| GCGCACGCTTTCTTAGAAAAG | 35891 + | TGG | 6    |
| AACTTCGCTAATGGTAGATA  | 35924 + | CGG | 80   |
| TACGGTGCATATAATTAATT  | 35942 + | CGG | 730  |
| GCATATAATTAATTCCGGTAT | 35948 + | TGG | 1255 |
| CAAACGTCATTGCATAATCA  | 35970 - | GGG | 1795 |
| GCAAACGTCATTGCATAATC  | 35971 - | AGG | 24   |
| ATGACGTTTGCTAAAAATAA  | 35999 + | AGG | 4    |
| CGTTTGCTAAAAATAAAGGT  | 36003 + | TGG | 199  |
| CCGCCATGATTGCTTTTGC   | 36016 - | TGG | 237  |
| ATCTCCAGCAAAGCAATCA   | 36028 + | TGG | 19   |
| TCTCCAGCAAAGCAATCAT   | 36029 + | GGG | 1    |
| CCAGCAAAGCAATCATGGG   | 36032 + | CGG | 187  |
| CGGTGCTAGCTTCGTAAGAA  | 36052 + | AGG | 140  |
| AGAAAGGATTACATCAATAA  | 36068 + | AGG | 129  |
| TCTTAGGATTCCATCTAATT  | 36090 - | CGG | 143  |
| ACACATTGTACCGAATTAGA  | 36096 + | TGG | 252  |
| CGATTGTAATTGCTTGATGT  | 36132 - | TGG | 1993 |
| GCTAAGTTATATAAACAAAT  | 36170 + | CGG | 5    |
| TATAAACAAATCGGCTTAAA  | 36179 + | AGG | 173  |
| TAAAAGGTATCTACTTCACA  | 36195 + | AGG | 453  |
| AAAAGGTATCTACTTCACAA  | 36196 + | GGG | 83   |
| AGGGATAAATATAAATAAAG  | 36215 + | AGG | 153  |
| GAAACGAGAATAAAAAATGA  | 36266 + | TGG | 117  |
| AAAAATGATGGTGTTGACTT  | 36278 + | AGG | 184  |
| GGTGTTGACTTAGGTGACAT  | 36287 + | TGG | 372  |
| AATACAGCATCTATAAGAAT  | 36335 + | AGG | 6    |
| ATAGGTATCAATGACAAACA  | 36353 + | AGG | 11   |
| CGTATCGATCTAAAAGCACA  | 36377 + | TGG | 388  |

|                       |         |     |      |
|-----------------------|---------|-----|------|
| TCCATAAACAAATGTAATCT  | 36391 - | AGG | 97   |
| ACCTAGATTACATTTGTTTA  | 36406 + | TGG | 151  |
| ACAACATCGTCGATAATAAG  | 36439 - | GGG | 523  |
| TTACAACATCGTCGATAATA  | 36441 - | AGG | 11   |
| ATTATCGACGATGTTGTAAA  | 36461 + | AGG | 179  |
| AACCTTTTTAGGTATCTTGT  | 36476 - | AGG | 12   |
| GCGTGTTTGATAACCTTTTT  | 36487 - | AGG | 119  |
| TACCTACAAGATACCTAAAA  | 36490 + | AGG | 25   |
| AAAAAGGTTATCAAACACGC  | 36506 + | TGG | 154  |
| TCTTTCAATATCGTTGATAG  | 36590 + | TGG | 298  |
| AAAAGAAATCGATGTAAAT   | 36631 + | TGG | 658  |
| AGTAGATTTAAAGGTGCGAA  | 36764 + | AGG | 25   |
| AAAGGTGCGAAAGGTGATAA  | 36773 + | AGG | 17   |
| GAAAGGTGATAAAGGCGAAC  | 36781 + | CGG | 29   |
| AAAGGTGATAAAGGCGAACC  | 36782 + | GGG | 45   |
| CCTTTTGCACCAGTTGTCC   | 36784 - | CGG | 942  |
| AAAGGCGAACCGGGACAACC  | 36791 + | TGG | 130  |
| CCTGCTTACCTTTTGCACC   | 36793 - | AGG | 1277 |
| CCGGGACAACCTGGTGCAAA  | 36800 + | AGG | 26   |
| CCTGGTGCAAAAGGTGAAGC  | 36809 + | AGG | 67   |
| AAAGGTGAAGCAGGTAAAAA  | 36818 + | AGG | 4    |
| GCAGGTAAAAAAGGAGAACA  | 36827 + | AGG | 22   |
| AAAGGAGAACAAGGCGCACC  | 36836 + | CGG | 259  |
| ACTACAGTACCGTTTTTACC  | 36838 - | GGG | 1646 |
| CAAGGCGCACCCGGTAAAAA  | 36845 + | CGG | 51   |
| ATTTGCCACATTTTAGTGTC  | 36871 - | AGG | 164  |
| TCAATCCTGACACTAAAATG  | 36882 + | TGG | 11   |
| ACTAAAATGTGGCAAATTGA  | 36893 + | TGG | 260  |
| TTGATTTTGTCCAATAACTC  | 36925 - | AGG | 382  |
| CAAAGCAGAACCTGAGTTAT  | 36931 + | TGG | 316  |
| ATCAATATCGCAAATGTTGA  | 36959 + | AGG | 119  |
| TCAATATCGCAAATGTTGAA  | 36960 + | GGG | 85   |
| CAACGACTCTAAAACGTATA  | 37030 + | CGG | 531  |
| CTTAATGTGTTTCATAGATTC | 37069 - | AGG | 1938 |
| GAAAGTGTATTGCAACAGAT  | 37145 + | TGG | 302  |
| AGTTAGTACAGAAGATTTTG  | 37174 + | AGG | 31   |
| TCGTCATGATTATGATTTTT  | 37213 - | TGG | 278  |
| AGCTTTTACTAAACAACAAG  | 37273 + | CGG | 528  |
| CCTGTCCAAATTTTAACCGT  | 37312 - | CGG | 656  |
| AAAAAGCGCATCTCAACCGA  | 37312 + | CGG | 151  |
| CTCAACCGACGGTTAAAATT  | 37323 + | TGG | 157  |
| CCGACGGTTAAAATTTGGAC  | 37328 + | AGG | 33   |
| TAATTAAGTAAAGTGATTA   | 37371 - | GGG | 222  |



|                       |         |     |      |
|-----------------------|---------|-----|------|
| TTAATTAAGTAAAGTGTATT  | 37372 - | AGG | 427  |
| TAATACACTTTACTTAATTA  | 37390 + | AGG | 81   |
| AATACACTTTACTTAATTA   | 37391 + | GGG | 188  |
| ATACACTTTACTTAATTAAG  | 37392 + | GGG | 33   |
| TAATTAAGGGGTGATTTTTA  | 37404 + | TGG | 1405 |
| TAAGGGGTGATTTTTATGGA  | 37408 + | AGG | 1    |
| GTAAAGAACTTATTTACGA   | 37444 + | AGG | 104  |
| GAATATACAAAAGTATATGC  | 37471 + | TGG | 25   |
| ATGAAGGCTTTTTCCATACT  | 37484 - | TGG | 59   |
| GGTTTTATTACAAAAGATGA  | 37500 - | AGG | 29   |
| GGATATTTATTTTTAGGTAA  | 37521 - | GGG | 12   |
| CGGATATTTATTTTTAGGTA  | 37522 - | AGG | 66   |
| CTATCCGGATATTTATTTTT  | 37527 - | AGG | 774  |
| CTTACCTAAAAATAAATATC  | 37539 + | CGG | 1    |
| GTTGATTCTTCTATGCTATC  | 37542 - | CGG | 806  |
| TAGAAGAATCAACAGCAAAA  | 37568 + | TGG | 363  |
| ACAGCAAAATGGACAATAAA  | 37579 + | TGG | 42   |
| GTCACCTGATAACTTTTATT  | 37593 - | AGG | 361  |
| TGAACCTAATAAAAAGTTATC | 37605 + | AGG | 1089 |
| ACAATAGAAAATGTACGTAG  | 37630 + | CGG | 469  |
| ATGTACGTAGCGGTATAATG  | 37640 + | AGG | 8    |
| AGGGTTTCGCAAACTAATTT  | 37660 + | AGG | 1157 |
| AATTTAGGTTCAAGTGATTT  | 37675 + | AGG | 101  |
| TCAAGTGATTTAGGAATATC  | 37684 + | AGG | 112  |
| GGAATATCAGGAGTCAATAG  | 37696 + | CGG | 75   |
| GTGACATACAACATCCCTGA  | 37734 - | AGG | 429  |
| ATCAACTTTAGTAATCCTTC  | 37735 + | AGG | 28   |
| TCAACTTTAGTAATCCTTCA  | 37736 + | GGG | 99   |
| AATTATTCAATGGTCAATGT  | 37782 - | CGG | 948  |
| AGTCGTTTTAAAATTATTCAA | 37792 - | TGG | 31   |
| TTTTAGTCGTTTTTTTTATTT | 37834 + | TGG | 5    |
| GTTTTTTTTATTTTGAAAAA  | 37842 + | AGG | 2    |
| GGAAAAAAGGAGCAAACAAA  | 37855 + | TGG | 1691 |
| AATCAATTCTTAGCGAATAA  | 37925 + | AGG | 71   |
| CTTTCTTCATCTACTGGTAT  | 37939 - | CGG | 409  |
| GAAACACTTTCTTCATCTAC  | 37945 - | TGG | 546  |
| CATTTCCCTTCTTGAGATGT  | 38017 - | TGG | 215  |
| GATAATCCAACATCTCAAGA  | 38027 + | AGG | 88   |
| ATAATCCAACATCTCAAGAA  | 38028 + | GGG | 322  |
| CAACATCTCAAGAAGGGAAA  | 38034 + | TGG | 12   |
| AACATCTCAAGAAGGGAAAT  | 38035 + | GGG | 190  |
| AGTAAATATAGAAAAGCAAC  | 38090 + | AGG | 279  |
| GGTGTCATTACTTCTTTAAT  | 38104 - | AGG | 50   |

|                       |         |     |      |
|-----------------------|---------|-----|------|
| TTTGTGTCGTTTCATATTCGT | 38125 - | AGG | 1823 |
| ATGAACGACACAAATGATTT  | 38150 + | AGG | 3    |
| TGAACGACACAAATGATTTA  | 38151 + | GGG | 917  |
| CGACACAAATGATTTAGGGT  | 38155 + | AGG | 511  |
| CACAAATGATTTAGGGTAGG  | 38158 + | TGG | 202  |
| CAAAAAATCAAGCAGAAAAA  | 38198 + | TGG | 53   |
| AAATGGTTTGACAATTCATT  | 38215 + | AGG | 389  |
| AATGGTTTGACAATTCATTA  | 38216 + | GGG | 395  |
| GAAATCCATACCAACCATCT  | 38234 - | GGG | 592  |
| TGAAATCCATACCAACCATC  | 38235 - | TGG | 128  |
| GGGAAACAATTC AACCCAGA | 38236 + | TGG | 24   |
| AACAATTC AACCCAGATGGT | 38240 + | TGG | 373  |
| TTCAACCCAGATGGTTGGTA  | 38245 + | TGG | 16   |
| CGCTAACATAAAGAACATAT  | 38272 - | TGG | 1800 |
| ATGTTCTTTATGTTAGCGAC  | 38293 + | AGG | 47   |
| TTATGTTAGCGACAGGCGAA  | 38300 + | AGG | 85   |
| GCGACAGGCGAAAGGCTGCA  | 38308 + | AGG | 26   |
| TCTTTGCTTTATTATCAAAC  | 38333 - | GGG | 271  |
| ATCTTTGCTTTATTATCAAA  | 38334 - | CGG | 28   |
| AAAGCAAAGATTGAAAAATA  | 38362 + | TGG | 29   |
| ACGACAATATCCAACCTTTTG | 38400 - | CGG | 557  |
| CAGCTTTTTACCGCAAAGT   | 38406 + | TGG | 241  |
| CTCCGCCACCATACTTTGAC  | 38426 - | GGG | 165  |
| GCTCCGCCACCATACTTTGA  | 38427 - | CGG | 22   |
| GTCGTTTTCCCGTCAAAGTA  | 38434 + | TGG | 58   |
| GTTTTCCCGTCAAAGTATGG  | 38437 + | TGG | 457  |
| TTCCCGTCAAAGTATGGTGG  | 38440 + | CGG | 10   |
| TCAAAGTATGGTGGCGGAGC  | 38446 + | TGG | 249  |
| TTAAATACTTTCACATCATT  | 38497 + | TGG | 44   |
| TCACATCATTTGGTCAAAC   | 38507 + | TGG | 153  |
| TCATTTGGTCAAACCTGGAA  | 38512 + | CGG | 410  |
| GGTCAAACCTGGAACGGTAA  | 38518 + | AGG | 17   |
| AAAACCTGGAACGGTAAAGGT | 38522 + | TGG | 30   |
| AACGGTAAAGGTTGGACTAA  | 38530 + | TGG | 37   |
| ACTAATGGCGTTGCGCAACC  | 38545 + | TGG | 109  |
| ACAGTTTCAGGACCCCAACC  | 38547 - | AGG | 105  |
| ATGGCGTTGCGCAACCTGGT  | 38549 + | TGG | 448  |
| TGGCGTTGCGCAACCTGGTT  | 38550 + | GGG | 182  |
| GGCGTTGCGCAACCTGGTTG  | 38551 + | GGG | 180  |
| ACATGTCTTGTCACAGTTTC  | 38559 - | AGG | 47   |
| TTAACCTAATAAAATACAT   | 38598 - | TGG | 2065 |
| ACAATCCAATGTATTTTATT  | 38609 + | AGG | 247  |
| TGCCAACGCTTAAGTTGTTA  | 38624 - | GGG | 1309 |

|                      |         |     |      |
|----------------------|---------|-----|------|
| TTGCCAACGCTTAAGTTGTT | 38625 - | AGG | 198  |
| TCCCTAACAACTTAAGCGT  | 38638 + | TGG | 381  |
| AGCGTTGGCAATAAAGCTAA | 38653 + | AGG | 54   |
| GCAAGCGACTACAAAAAAG  | 38685 + | AGG | 51   |
| GCTACAAGCATAATTTTTTT | 38703 - | AGG | 161  |
| AAAAAAATTATGCTTGTAGC | 38722 + | CGG | 345  |
| AGGATCGTTATAACCATGAC | 38725 - | CGG | 41   |
| ATTATGCTTGTAGCCGGTCA | 38728 + | TGG | 58   |
| GTTCCGTTTCTACTGCTCC  | 38745 - | AGG | 1091 |
| TATAACGATCCTGGAGCAGT | 38752 + | AGG | 192  |
| GATCCTGGAGCAGTAGGAAA | 38758 + | CGG | 31   |
| CTTAAATACTTAGCGATATT | 38802 - | AGG | 508  |
| GCTAAGTATTTAAGACATGC | 38827 + | AGG | 3662 |
| GGACATGAAGTTGCATTATA | 38848 + | CGG | 94   |
| CATGAAGTTGCATTATACGG | 38851 + | TGG | 185  |
| ATGTATCAAGATACTGCATA | 38893 + | CGG | 1759 |
| ACTGCATACGGTGTAAATGT | 38905 + | AGG | 64   |
| GTAGGCAATAAAAAAGATTA | 38923 + | TGG | 19   |
| AAAAAGATTATGGCTTATAT | 38933 + | TGG | 122  |
| AAAAGATTATGGCTTATATT | 38934 + | GGG | 49   |
| CTTATATTGGGTAAATCAC  | 38946 + | AGG | 175  |
| TTATATTGGGTAAATCACA  | 38947 + | GGG | 363  |
| GAAATACATTTAGACGCAGC | 38986 + | AGG | 480  |
| GCAGCAGGAGAAAGCGCAAG | 39001 + | TGG | 13   |
| GCAGGAGAAAGCGCAAGTGG | 39004 + | TGG | 9    |
| CAGGAGAAAGCGCAAGTGGT | 39005 + | GGG | 396  |
| AATAACTTAGGACAAATAAG | 39094 + | AGG | 4    |
| ACATTTAGTAAATCATTACG | 39108 - | AGG | 712  |
| AATTATCGTTTATCTGAATT | 39172 + | AGG | 296  |
| TATTACTAATAAAAATGATA | 39198 + | TGG | 359  |
| CTAATAAAAATGATATGGAT | 39203 + | TGG | 536  |
| TTGTATTCTAAATTAATAGC | 39244 + | CGG | 189  |
| AGGCTTACCATGAATCGCAC | 39247 - | CGG | 107  |
| TTAATAGCCGGTGCATTCA  | 39256 + | TGG | 14   |
| CCAGCTACCAACCACCTAT  | 39267 - | AGG | 137  |
| GCGATTCATGGTAAGCCTAT | 39268 + | AGG | 172  |
| ATTCATGGTAAGCCTATAGG | 39271 + | TGG | 8    |
| TGGTAAGCCTATAGGTGGTT | 39276 + | TGG | 608  |
| CCTATAGGTGGTTTGGTAGC | 39283 + | TGG | 12   |
| GTATAACCTGCTGGCACTGG | 39324 - | TGG | 61   |
| AGTGTATAACCTGCTGGCAC | 39327 - | TGG | 2262 |
| TTATCGAGTGTATAACCTGC | 39333 - | TGG | 674  |
| AAAAATCCACCAGTGCCAGC | 39334 + | AGG | 2035 |

|                        |         |     |      |
|------------------------|---------|-----|------|
| TGCCTTGTTCTTTTTTATAA   | 39365 - | GGG | 61   |
| TTGCCTTGTTCTTTTTTATA   | 39366 - | AGG | 151  |
| TACACAGTAGCTAATGTTAA   | 39406 + | AGG | 332  |
| AAAGGTAATAATGTAAGAGA   | 39424 + | CGG | 56   |
| TCAACTAATTCAAGAATTAC   | 39451 + | AGG | 16   |
| CAACTAATTCAAGAATTACA   | 39452 + | GGG | 364  |
| AACTAATTCAAGAATTACAG   | 39453 + | GGG | 133  |
| ATACGTAATTGTTGTGTTGT   | 39466 - | TGG | 867  |
| AACACAACAATTACGTATGA   | 39487 + | CGG | 109  |
| GACGGTGCATATTGTATTAA   | 39505 + | TGG | 117  |
| CAACGTCGTTATATAGCGAC   | 39562 + | AGG | 32   |
| TCGTTATATAGCGACAGGAG   | 39567 + | AGG | 228  |
| AGCGACAGGAGAGGTAGACA   | 39576 + | AGG | 301  |
| ACAGGAGAGGTAGACAAGGC   | 39580 + | AGG | 65   |
| GGTAATAGAATAAGTAGTTT   | 39601 + | TGG | 249  |
| AATTTTGCTACATTAATTAT   | 39660 + | AGG | 86   |
| ATTTTGCTACATTAATTATA   | 39661 + | GGG | 374  |
| ACAGTTATTAATAACTATT    | 39690 + | TGG | 109  |
| TTATTAATAACTATTTGGA    | 39694 + | TGG | 79   |
| AGAAATGTTAAAAAGTGTAT   | 39712 - | AGG | 2501 |
| AAGATTTAAATGTAGATAAC   | 39754 + | AGG | 3738 |
| TTAAATGTAGATAACAGGC    | 39758 + | AGG | 505  |
| TAGATAACAGGCAGGTACTION | 39766 + | CGG | 630  |
| TAGCTATAACATAAAAAAAT   | 39779 - | AGG | 3    |
| ATAACAAAAAACTAGCCCGA   | 39803 - | AGG | 228  |
| TTTATGTTATAGCTAGCCTT   | 39803 + | CGG | 35   |
| TTATGTTATAGCTAGCCTTC   | 39804 + | GGG | 959  |
| GTGACATGCTTGGGTGAACA   | 39861 - | AGG | 794  |
| AAACATCCAGTGACATGCTT   | 39870 - | GGG | 52   |
| AAAACATCCAGTGACATGCT   | 39871 - | TGG | 967  |
| TGTTACCCAAGCATGTCAC    | 39880 + | TGG | 2450 |
| CTAAAGTCATATATACTACG   | 39928 - | GGG | 2811 |
| GCTAAAGTCATATATACTAC   | 39929 - | GGG | 2178 |
| TGCTAAAGTCATATATACTA   | 39930 - | CGG | 1677 |
| TATAATTGCTTTTATATAGT   | 40003 + | AGG | 335  |
| GTAGGAGTGAACATATATAGC  | 40021 + | CGG | 14   |
| TAGGAGTGAACATATATAGCC  | 40022 + | GGG | 5270 |
| TCAGATACATGGCCTCTGCC   | 40024 - | CGG | 326  |
| TGAACTATATAGCCGGGCAG   | 40028 + | AGG | 114  |
| GGGACCAACAGTCAGATACA   | 40035 - | TGG | 14   |
| GAGGCCATGTATCTGACTGT   | 40047 + | TGG | 87   |
| ACAAGGAAGATGTCTCCTGT   | 40055 - | GGG | 67   |
| TATCTGACTGTTGGTCCAC    | 40056 + | AGG | 91   |

|                       |         |     |      |
|-----------------------|---------|-----|------|
| TAACCGTATCGATTAAGATA  | 40130 - | CGG | 2249 |
| TAACCGTATCTTAATCGATA  | 40143 + | CGG | 995  |
| TGTGGTTTTGTTGGTTGTAG  | 40161 - | GGG | 8    |
| CTGTGGTTTTGTTGGTTGTA  | 40162 - | GGG | 585  |
| TCTGTGGTTTTGTTGGTTGT  | 40163 - | AGG | 389  |
| AATAGGATCTGTGGTTTTGT  | 40170 - | TGG | 19   |
| TCCTAAATTAATAGGATCTG  | 40179 - | TGG | 12   |
| AACCACAATCCTAAATTAAT  | 40187 - | AGG | 3207 |
| ACCACAGATCCTATTAATTT  | 40194 + | AGG | 362  |
| ATCCTATTAATTTAGGATTG  | 40201 + | TGG | 1    |
| GTTATTTTTTGCCTTTTTTT  | 40223 + | GGG | 1    |
| CGTTTTTTTTGGGGCAAAAAA | 40234 + | AGG | 89   |
| GTTTTTTTTGGGGCAAAAAA  | 40235 + | GGG | 934  |
| TGAAAAAGGGCAAACGCTTG  | 40267 + | TGG | 358  |
| ACGCTTGTGGAAAAGCTAAA  | 40280 + | AGG | 484  |
| CCAAAAACACTGTTGTATCA  | 40303 - | AGG | 1697 |
| CGTGTACGTTAGAGAATGAC  | 40347 + | CGG | 110  |
| ATCCTTGTATGATGGTAAAC  | 40350 - | CGG | 1151 |
| GACCGTTTACCATCATACA   | 40364 + | AGG | 350  |
| GGTTTACCATCATACAAGGA  | 40368 + | TGG | 91   |
| GTTTACCATCATACAAGGAT  | 40369 + | GGG | 1674 |

## Normalized Reads Replicate 2

32.64542655  
79.84894873  
0.882308826  
163.2271328  
4.852698542  
53.82083837  
719.9640018  
1019.507848  
392.186273  
507.7687292  
896.4257669  
3257.04303  
1183.61729  
1450.51571  
1564.774702  
326.8954199  
1718.296438  
85.5839561  
656.8789208  
3188.222942  
130.1405518  
343.2181332  
4715.058365  
18.52848534  
641.8796707  
301.308464  
85.14280168  
279.2507433  
1080.387157  
1196.851922  
8380.610381  
75.87855901  
616.7338692  
22.94002947  
548.3549352  
3850.83687  
6844.510716  
2254.740204  
1067.593679  
7547.71085  
641.4385163  
2459.435852

2050.485711  
7826.079284  
549.237244  
1834.320049  
2.646926477  
8396.933095  
743.3451857  
14885.87335  
0.441154413  
436.7428687  
1868.288938  
6368.505104  
3581.732678  
376.7458686  
6749.221362  
517.9152807  
1758.44149  
3828.779149  
3991.565128  
14008.41723  
7835.784681  
6129.399412  
29.11619125  
1136.854922  
1475.661511  
2814.124  
271.7511183  
7.499625019  
4589.329357  
3.970389716  
311.8961699  
97.93627966  
64.84969869  
3498.354494  
1165.971113  
26456.03014  
171.6090666  
4546.537379  
916.2777155  
2175.773564  
349.8354494  
2568.842146  
666.5843178

37.93927951  
3359.390854  
577.9122809  
143.3751842  
2736.039669  
904.8077008  
1725.796063  
477.3290747  
19284.624  
1856.377769  
1654.329048  
1010.243605  
4999.161807  
6520.262222  
732.7574798  
5.735007367  
6286.450383  
141.6105665  
65.2908531  
71.46701488  
880.1030537  
81.17241197  
1221.997724  
2029.751454  
1224.203496  
2430.760815  
3664.228553  
2755.009308  
1997.106027  
36.61581627  
666.1431634  
3965.537017  
25.58695595  
2853.386742  
3884.364605  
9206.451442  
1085.68101  
3649.670458  
1922.992086  
2447.524683  
5.293852954  
1431.54607  
349.8354494



10255.51664  
1438.163386  
1498.601541  
2.646926477  
359.5408465  
13018.90788  
125.7290077  
680.2601046  
1941.079417  
1811.821174  
14.55809562  
234.6941476  
1472.57343  
5675.010367  
379.8339495  
15393.20093  
365.7170083  
7597.120144  
1025.242856  
1607.125526  
2.205772064  
3906.86348  
4749.468409  
1578.891644  
7309.046312  
516.1506631  
872.1622742  
396.1566628  
1148.324937  
1345.079805  
94.40704435  
4488.304997  
2.205772064  
15525.54725  
72.34932371  
431.8901702  
1364.931753  
184.4025446  
967.4516274  
1158.030334  
145.5809562  
3009.555405  
623.7923398

1054.800201  
1619.919004  
400.1270525  
915.3954067  
1199.057694  
126.6113165  
4.411544129  
7830.049674  
924.6596494  
2304.149498  
1.764617651  
0.882308826  
9325.563134  
2475.758565  
2280.32716  
1877.994336  
9.26424267  
209.1071917  
3910.392716  
1218.027334  
1133.766841  
2.646926477  
68.37893399  
777.7552299  
46.32121335  
487.9167806  
2997.203081  
142.0517209  
0.882308826  
1.764617651  
4035.239414  
4570.800872  
429.2432437  
29.55734566  
4037.445187  
3403.506295  
1.323463239  
1131.119915  
0.441154413  
4273.021643  
718.1993841  
1344.63865  
644.5265972

205.5779564  
78.9666399  
635.7035089  
39.26274275  
624.6746486  
1417.429129  
486.152163  
251.4580153  
3062.493934  
196.7548681  
1243.61429  
2487.22858  
49.85044865  
8839.410971  
142.4928754  
101.465515  
401.0093613  
1081.269466  
64.84969869  
1359.196746  
7679.616019  
240.429155  
572.1772735  
206.4602652  
20.29310299  
835.9876124  
73.23163254  
2.205772064  
20.29310299  
54.26199278  
7.499625019  
2166.068167  
125.2878533  
832.8995315  
336.600817  
3682.757039  
32.20427214  
2661.484573  
144.6986474  
32.20427214  
3.08808089  
263.3691845  
4791.819233

3034.701206  
769.373296  
77.64317666  
1693.591791  
2819.859007  
996.1266643  
2.646926477  
1038.036333  
193.6667872  
113.8178385  
1019.507848  
35.73350744  
336.600817  
238.6645374  
529.3852954  
1059.6529  
178.6675372  
44.5565957  
3.970389716  
13.23463239  
4.852698542  
383.3631848  
290.2796037  
3682.757039  
23.82233829  
520.5622072  
401.4505157  
513.0625822  
1720.50221  
3779.811009  
64.84969869  
678.9366414  
631.7331192  
561.5895676  
551.8841705  
1157.148025  
865.544958  
65.2908531  
206.4602652  
870.838811  
432.772479  
652.4673766  
9.705397083

1312.875533  
98.37743407  
1344.197496  
12.79347797  
19.85194858  
6.617316193  
35.29235303  
250.1345521  
479.0936924  
43.67428687  
4.411544129  
0.882308826  
19.41079417  
191.0198608  
496.2987145  
8.381933844  
101.9066694  
16.32271328  
931.2769656  
9.705397083  
3015.290412  
292.4853757  
281.015361  
29.55734566  
755.2563548  
1138.61954  
96.61281642  
102.3478238  
483.9463909  
326.4542655  
2850.298662  
1870.053556  
375.8635598  
206.0191108  
39.26274275  
173.3736843  
24.70464712  
824.5175976  
0.441154413  
7.058470606  
3.970389716  
20.7342574  
0.882308826

5.735007367  
812.6064285  
24.70464712  
434.0959423  
6.17616178  
112.4943753  
117.3470738  
16.32271328  
91.31896346  
14.11694121  
0.882308826  
561.5895676  
691.7301194  
522.3268248  
11.02886032  
0.882308826  
220.136052  
915.3954067  
15.88155886  
42.35082364  
3128.225942  
168.5209857  
131.0228606  
31.76311773  
3429.093251  
432.3313246  
356.0116112  
6581.582686  
633.9388913  
509.5333469  
224.9887506  
61.32046339  
11.47001473  
74.55509577  
468.9471409  
926.424267  
418.2143834  
344.100442  
904.3665464  
1720.50221  
1806.527321  
7.940779432  
823.1941344

201.1664123  
2336.794925  
50.29160307  
21.17541182  
636.5858178  
1863.43624  
10.1465515  
23.38118388  
240.429155  
132.3463239  
1391.401018  
328.6600376  
2953.528794  
425.7140084  
697.4651267  
164.550596  
1514.483099  
541.737619  
425.272854  
170.2856034  
315.8665596  
236.0176109  
1603.155136  
189.6963975  
62.64392663  
70.14355165  
6.17616178  
607.4696265  
29.11619125  
19.85194858  
873.0445831  
1674.622151  
310.5727067  
75.4374046  
1911.522071  
7.499625019  
0.882308826  
74.11394136  
0.882308826  
3.529235303  
1.764617651  
138.0813312  
474.6821482

765.4029063  
544.3845455  
86.46626492  
449.9775011  
879.2207448  
457.9182806  
122.6409268  
728.3459356  
69.70239723  
23.38118388  
434.0959423  
115.1413018  
63.96738987  
207.342574  
357.7762288  
7162.141893  
483.9463909  
534.237994  
37.93927951  
315.4254052  
129.6993974  
804.6656491  
427.4786261  
37.05697068  
1899.610902  
1.764617651  
3883.923451  
22.49887506  
2945.588015  
439.3897952  
330.8658097  
124.8466988  
107.6416767  
456.5948173  
86.90741933  
57.79122809  
517.9152807  
126.1701621  
298.6615375  
69.70239723  
22.49887506  
17.64617651  
132.7874783



10.58770591  
875.2503551  
126.1701621  
135.8755592  
1251.113915  
337.0419714  
394.8331995  
179.1086916  
1.764617651  
129.258243  
370.1285524  
446.0071114  
138.0813312  
272.6334272  
3541.587627  
757.9032813  
171.6090666  
172.050221  
1856.377769  
628.6450383  
335.2773538  
57.35007367  
46.76236776  
275.721508  
223.6652873  
900.3961567  
95.28935318  
140.7282577  
395.7155083  
1095.827562  
112.4943753  
11.91116915  
46.32121335  
880.5442081  
2.646926477  
146.4632651  
209.5483461  
528.944141  
77.64317666  
176.0206107  
16.32271328  
78.52548549  
3146.313273

12.35232356  
331.3069641  
149.9925004  
472.4763762  
0.882308826  
124.8466988  
392.186273  
653.3496855  
11.02886032  
31.32196331  
56.90891926  
626.8804207  
217.4891255  
92.20127229  
155.7275077  
40.14505157  
74.55509577  
1230.379657  
535.1203028  
2052.691483  
211.7541182  
0.441154413  
103.2301326  
164.1094416  
25.58695595  
921.1304141  
12.79347797  
1017.302076  
151.757118  
285.8680595  
16.76386769  
154.4040445  
787.460627  
1.764617651  
221.9006697  
86.46626492  
165.8740592  
474.6821482  
4351.988283  
1035.389407  
52.05622072  
140.7282577  
790.9898623

4278.75665  
598.6465383  
291.6030669  
153.5217357  
19.41079417  
138.0813312  
85.5839561  
94.40704435  
576.1476632  
20.7342574  
163.6682872  
109.8474488  
255.8695595  
329.9835008  
124.8466988  
17.2050221  
168.0798313  
296.8969199  
92.20127229  
313.6607875  
20.29310299  
804.6656491  
142.0517209  
126.6113165  
17.64617651  
15.88155886  
112.0532209  
267.3395742  
903.925392  
850.9868624  
259.8399492  
56.02661043  
26.02811036  
303.9553905  
295.1323022  
6.17616178  
104.1124414  
948.4819877  
1832.555431  
1.764617651  
28.67503684  
15.88155886  
0.441154413

15.88155886  
206.4602652  
40.58620598  
41.46851481  
453.5067364  
24.26349271  
1623.007085  
1746.530321  
226.3122138  
487.4756262  
93.08358112  
370.5697068  
14.55809562  
382.480876  
287.1915228  
45.88005894  
2885.14986  
1102.444878  
1.764617651  
985.9801128  
471.1529129  
27.79272801  
8.823088257  
3634.970836  
74.99625019  
1.323463239  
229.8414491  
2.646926477  
360.8643097  
141.6105665  
3.529235303  
40.14505157  
191.0198608  
1094.504098  
5.735007367  
0.441154413  
3.08808089  
243.5172359  
1524.188496  
15.88155886  
26.91041918  
555.4134058  
51.61506631

16.32271328  
63.96738987  
489.2402439  
566.0011117  
69.70239723  
158.8155886  
296.014611  
33.08658097  
198.9606402  
150.8748092  
1638.888644  
131.9051694  
242.1937727  
50.29160307  
298.6615375  
193.6667872  
59.99700015  
62.64392663  
104.5535958  
58.67353691  
42.79197805  
1543.158136  
21.17541182  
33.52773538  
175.5794563  
32.20427214  
70.14355165  
81.61356638  
294.6911478  
30.8808089  
57.35007367  
2127.687733  
112.4943753  
172.050221  
5.735007367  
9.26424267  
101.9066694  
123.5232356  
337.9242803  
450.85981  
158.3744342  
10.1465515  
414.6851481

148.6690371  
101.465515  
179.9910004  
28.23388242  
718.6405386  
9.705397083  
229.4002947  
21.61656623  
242.1937727  
63.96738987  
150.8748092  
1850.642762  
7.058470606  
35.29235303  
269.5453463  
4.411544129  
22.49887506  
206.9014196  
38.38043392  
61.7616178  
27.3515736  
60.87930898  
17.64617651  
103.671287  
105.8770591  
24.26349271  
93.08358112  
190.5787064  
322.4838758  
42.35082364  
2155.480461  
169.4032945  
59.55584574  
21.17541182  
91.31896346  
49.40929424  
129.258243  
7.499625019  
1.764617651  
3.08808089  
434.9782511  
29.55734566  
80.29010314

1184.940753  
144.6986474  
1.764617651  
37.05697068  
134.9932503  
78.52548549  
385.1278024  
78.9666399  
1069.358297  
565.1188029  
208.2248829  
320.2781037  
2.205772064  
340.5712067  
195.4314049  
1241.849672  
285.8680595  
45.88005894  
3804.956811  
3.08808089  
65.73200752  
1943.285189  
24.26349271  
104.5535958  
10.1465515  
45.43890453  
26.91041918  
13.23463239  
52.93852954  
85.14280168  
404.979751  
114.7001473  
53.37968396  
131.0228606  
49.40929424  
449.0951923  
348.0708318  
33.52773538  
464.0944423  
667.9077811  
148.6690371  
657.7612296  
294.2499934

41.0273604  
18.08733093  
412.9205304  
35.29235303  
33.96888979  
1351.255967  
166.3152137  
78.9666399  
174.6971475  
115.5824562  
25.58695595  
29.55734566  
17.2050221  
1.764617651  
56.90891926  
132.7874783  
27.79272801  
663.0550825  
255.4284051  
161.0213607  
17.64617651  
19.85194858  
860.2511051  
11.47001473  
30.43965449  
220.136052  
51.61506631  
153.9628901  
704.0824429  
162.7859783  
324.6896479  
415.1263025  
694.3770459  
109.4062944  
131.464015  
124.4055444  
26.91041918  
59.11469132  
0.882308826  
1.764617651  
14.55809562  
4413.308746  
48.085831



49.85044865  
1377.284077  
1735.50146  
146.0221107  
44.5565957  
39.70389716  
25.14580153  
87.34857375  
626.8804207  
406.3032143  
378.5104862  
33.96888979  
119.9940003  
219.2537432  
1.764617651  
337.9242803  
12.79347797  
102.7889782  
633.0565825  
744.2274945  
481.2994644  
12.79347797  
28.67503684  
28.23388242  
389.5393466  
1255.084305  
49.40929424  
3.529235303  
1307.140525  
56.02661043  
15.44040445  
71.9081693  
153.9628901  
119.1116915  
727.0224724  
21.17541182  
7.058470606  
123.0820812  
277.9272801  
743.7863401  
359.0996921  
259.3987948  
56.90891926

603.4992368  
465.4179056  
969.6573995  
89.1131914  
24.70464712  
397.0389716  
592.9115309  
267.7807286  
303.9553905  
448.6540379  
805.9891123  
34.85119862  
29.55734566  
201.1664123  
8.381933844  
33.52773538  
376.7458686  
850.9868624  
472.0352218  
1868.288938  
386.4512657  
3.08808089  
368.3639347  
2859.12175  
450.4186555  
3189.105251  
22.49887506  
21.61656623  
8.381933844  
141.1694121  
430.566707  
101.9066694  
16.76386769  
7.499625019  
1007.596679  
11.02886032  
7.499625019  
381.1574127  
72.79047812  
161.4625151  
436.3017143  
18.52848534  
116.0236106

161.0213607  
180.4321549  
127.9347797  
76.31971343  
1030.977863  
241.3114638  
157.9332798  
317.6311773  
186.6083166  
78.08433108  
112.0532209  
37.05697068  
1065.387907  
1300.082055  
42.35082364  
14.55809562  
361.7466186  
31.32196331  
68.82008841  
14.11694121  
1.764617651  
0.441154413  
22.94002947  
0.441154413  
96.61281642  
45.88005894  
1264.789702  
31.76311773  
352.0412215  
122.1997724  
206.4602652  
251.8991697  
157.9332798  
16.76386769  
49.40929424  
335.7185082  
164.1094416  
221.0183608  
46.32121335  
551.0018617  
4.411544129  
7.058470606  
278.8095889

75.87855901  
66.61431634  
7.499625019  
146.0221107  
218.8125888  
502.4748763  
4.411544129  
871.7211198  
94.40704435  
23.38118388  
418.2143834  
3.970389716  
263.8103389  
15.88155886  
64.40854428  
743.7863401  
118.2293826  
1.764617651  
8.381933844  
122.1997724  
78.52548549  
38.38043392  
202.0487211  
557.1780235  
26.02811036  
157.9332798  
183.9613902  
9.705397083  
76.31971343  
386.0101113  
0.441154413  
63.96738987  
5.293852954  
848.7810904  
23.38118388  
385.5689568  
15.88155886  
3.08808089  
824.0764432  
40.14505157  
58.67353691  
411.1559128  
93.96588994

651.1439134  
6.617316193  
588.4999868  
4.411544129  
21.17541182  
624.2334942  
134.5520959  
33.08658097  
36.61581627  
224.5475961  
6.617316193  
46.32121335  
569.530347  
72.34932371  
663.0550825  
11.91116915  
64.40854428  
159.256743  
20.29310299  
157.4921254  
60.43815456  
52.93852954  
294.6911478  
18.52848534  
51.17391189  
541.2964646  
660.4081561  
42.79197805  
21.61656623  
208.6660373  
17.64617651  
152.6394269  
7.499625019  
358.6585377  
378.0693318  
172.050221  
0.882308826  
0.441154413  
411.5970672  
40.14505157  
48.96813983  
0.882308826  
77.64317666

1118.767591  
142.9340298  
16.76386769  
695.7005091  
1.323463239  
33.08658097  
56.90891926  
93.52473553  
13.6757868  
171.1679122  
592.4703765  
1559.039695  
1.323463239  
140.2871033  
5.293852954  
6.17616178  
171.1679122  
3.970389716  
1205.67501  
138.5224856  
22.49887506  
146.4632651  
41.46851481  
10.1465515  
64.40854428  
20.7342574  
15.44040445  
25.58695595  
140.7282577  
404.979751  
30.43965449  
0.882308826  
14.11694121  
1.764617651  
570.4126558  
7.499625019  
3.970389716  
68.37893399  
258.9576404  
70.14355165  
107.6416767  
7.499625019  
104.9947503

4.852698542  
813.0475829  
22.05772064  
38.82158833  
62.64392663  
1.764617651  
1609.331298  
74.99625019  
48.96813983  
877.4561272  
23.82233829  
136.3167136  
25.58695595  
150.8748092  
16.32271328  
39.70389716  
12.79347797  
183.5202358  
109.4062944  
59.99700015  
16.76386769  
15.44040445  
1289.494349  
88.67203699  
1.323463239  
110.7297576  
1.323463239  
1040.242106  
22.94002947  
64.40854428  
61.7616178  
20.29310299  
0.441154413  
541.737619  
3.529235303  
3.970389716  
22.49887506  
3.970389716  
453.9478908  
132.7874783  
221.0183608  
87.78972816  
12.35232356

68.37893399  
401.8916701  
13.23463239  
44.11544129  
1016.860922  
56.90891926  
22.49887506  
6.617316193  
12.35232356  
3.529235303  
5.735007367  
72.79047812  
56.02661043  
179.1086916  
1.764617651  
21.17541182  
10.1465515  
78.52548549  
330.8658097  
8.823088257  
228.9591403  
21.61656623  
813.0475829  
10.58770591  
85.14280168  
167.6386769  
1.764617651  
0.441154413  
56.02661043  
23.82233829  
7.940779432  
65.2908531  
36.61581627  
27.79272801  
8.381933844  
83.81933844  
369.687398  
3.529235303  
28.23388242  
142.4928754  
68.82008841  
4.852698542  
202.4898755



17.64617651  
21.61656623  
348.5119862  
121.758618  
12.35232356  
7.499625019  
5.735007367  
63.96738987  
74.99625019  
106.7593679  
27.79272801  
161.4625151  
3162.635986  
2.205772064  
2.205772064  
176.9029196  
64.40854428  
61.7616178  
7.940779432  
52.49737513  
379.3927951  
901.7196199  
114.7001473  
244.3995447  
145.5809562  
112.0532209  
133.2286327  
29.11619125  
27.3515736  
0.441154413  
18.52848534  
34.85119862  
0.441154413  
1502.130776  
1701.53257  
5.293852954  
9.705397083  
2.205772064  
25.14580153  
66.17316193  
193.2256328  
0.882308826  
22.05772064

87.78972816  
2.205772064  
14.55809562  
9.705397083  
52.93852954  
207.342574  
50.29160307  
41.90966922  
48.52698542  
20.29310299  
56.46776485  
97.93627966  
0.882308826  
5.293852954  
19.41079417  
4.411544129  
46.76236776  
92.20127229  
4.411544129  
2.646926477  
43.67428687  
46.32121335  
2.205772064  
11.02886032  
402.3328245  
1267.436628  
35.29235303  
58.67353691  
181.3144637  
28.67503684  
32.64542655  
33.96888979  
3.529235303  
9.705397083  
111.170912  
0.882308826  
21.61656623  
53.37968396  
39.26274275  
57.79122809  
25.58695595  
5.735007367  
26.46926477

18.52848534  
231.6060668  
58.67353691  
348.0708318  
172.4913754  
106.7593679  
3.970389716  
149.551346  
9.26424267  
2.205772064  
562.4718764  
42.35082364  
208.6660373  
557.6191779  
6.617316193  
60.43815456  
0.441154413  
29.11619125  
71.46701488  
133.2286327  
4.411544129  
7.940779432  
41.0273604  
6.617316193  
46.32121335  
48.96813983  
249.2522433  
1.323463239  
288.9561404  
56.46776485  
3.08808089  
0.441154413  
0.882308826  
389.5393466  
148.6690371  
43.23313246  
10.1465515  
311.0138611  
58.2323825  
144.257493  
39.26274275  
7.499625019  
99.70089731

121.758618  
14.99925004  
19.41079417  
76.31971343  
34.4100442  
123.5232356  
8.823088257  
2.205772064  
115.1413018  
91.76011788  
24.26349271  
19.85194858  
18.52848534  
79.84894873  
19.85194858  
512.1802733  
8.823088257  
6.617316193  
23.38118388  
0.882308826  
658.202384  
35.73350744  
122.6409268  
5.735007367  
12.35232356  
88.67203699  
8.381933844  
16.32271328  
62.20277221  
332.6304273  
50.73275748  
46.32121335  
56.46776485  
0.441154413  
520.5622072  
1.323463239  
95.28935318  
6.17616178  
30.8808089  
260.722258  
149.9925004  
57.79122809  
15.88155886

62.64392663  
164.550596  
20.29310299  
50.73275748  
14.99925004  
245.723008  
13.6757868  
16.32271328  
17.64617651  
22.05772064  
14.55809562  
1.323463239  
28.67503684  
44.11544129  
40.14505157  
78.9666399  
121.758618  
337.9242803  
9.705397083  
6.17616178  
21.61656623  
3.529235303  
59.55584574  
15.88155886  
14.11694121  
472.4763762  
67.93777958  
13.23463239  
3.529235303  
57.79122809  
62.64392663  
116.9059194  
354.2469935  
145.1398018  
93.08358112  
4.852698542  
32.20427214  
195.4314049  
29.55734566  
581.8826706  
65.73200752  
707.1705238  
58.67353691

63.96738987  
24.70464712  
51.61506631  
79.40779432  
5.293852954  
2.646926477  
78.9666399  
69.70239723  
170.7267578  
36.61581627  
26.91041918  
266.016111  
1.323463239  
30.43965449  
82.49587521  
1.323463239  
3.970389716  
90.43665464  
7.058470606  
123.96439  
2.646926477  
318.5134861  
106.3182135  
81.61356638  
2.646926477  
175.1383019  
28.23388242  
36.61581627  
21.61656623  
57.35007367  
9.705397083  
71.9081693  
88.23088257  
4.852698542  
41.0273604  
354.2469935  
238.6645374  
37.93927951  
13.6757868  
19.41079417  
133.2286327  
18.52848534  
126.6113165

37.93927951  
302.1907728  
0.441154413  
44.11544129  
4.852698542  
7.058470606  
177.7852284  
3.970389716  
5.735007367  
23.82233829  
0.441154413  
44.99775011  
15.88155886  
4.411544129  
31.32196331  
8.381933844  
0.441154413  
3.970389716  
69.70239723  
7.499625019  
126.6113165  
134.9932503  
287.6326772  
104.5535958  
10.58770591  
306.6023169  
76.76086784  
0.882308826  
162.7859783  
110.7297576  
0.882308826  
13.23463239  
0.882308826  
78.08433108  
5.735007367  
249.6933977  
162.3448239  
2.646926477  
86.46626492  
9.26424267  
0.441154413  
104.5535958  
89.1131914

4.411544129  
8.823088257  
4.852698542  
4.411544129  
16.32271328  
26.46926477  
127.9347797  
56.46776485  
1.764617651  
3.08808089  
83.81933844  
22.49887506  
88.67203699  
19.41079417  
28.23388242  
100.1420517  
51.61506631  
760.5502078  
60.43815456  
10.58770591  
0.441154413  
160.5802063  
9.705397083  
82.05472079  
33.96888979  
93.08358112  
209.5483461  
217.0479711  
3.529235303  
15.44040445  
37.49812509  
94.40704435  
78.52548549  
29.99850007  
49.85044865  
7.940779432  
33.52773538  
3.529235303  
29.99850007  
3.970389716  
4.852698542  
19.41079417  
32.20427214



9.705397083  
323.3661846  
65.2908531  
158.3744342  
168.9621401  
47.64467659  
77.20202225  
133.2286327  
6.17616178  
3.970389716  
72.34932371  
131.464015  
42.79197805  
22.05772064  
12.35232356  
86.02511051  
68.37893399  
41.46851481  
8.823088257  
2.646926477  
15.44040445  
40.14505157  
17.64617651  
349.394295  
31.76311773  
122.6409268  
1330.521709  
161.0213607  
65.2908531  
48.96813983  
47.64467659  
23.82233829  
6.617316193  
1.764617651  
8.823088257  
93.08358112  
222.7829785  
2.205772064  
66.17316193  
145.5809562  
92.20127229  
8.823088257  
462.7709791

112.0532209  
12.35232356  
7.940779432  
18.08733093  
17.64617651  
8.823088257  
54.7031472  
161.0213607  
21.61656623  
105.8770591  
1.323463239  
51.17391189  
13.6757868  
36.61581627  
52.49737513  
642.3208251  
17.64617651  
8.823088257  
11.91116915  
2.205772064  
41.46851481  
66.61431634  
23.82233829  
43.23313246  
34.85119862  
353.8058391  
26.46926477  
12.79347797  
113.8178385  
7.499625019  
10.58770591  
9.26424267  
135.4344048  
16.32271328  
4.411544129  
105.8770591  
157.050971  
26.02811036  
5.293852954  
3.970389716  
25.14580153  
0.882308826  
214.4010447

367.0404715  
132.3463239  
79.40779432  
13.6757868  
128.3759341  
22.05772064  
2.205772064  
36.17466186  
0.441154413  
65.2908531  
11.91116915  
46.76236776  
41.46851481  
44.11544129  
89.99550022  
48.085831  
25.14580153  
37.93927951  
33.08658097  
10.1465515  
487.4756262  
154.4040445  
317.6311773  
40.58620598  
2.205772064  
17.2050221  
34.4100442  
16.32271328  
10.58770591  
4.852698542  
0.882308826  
45.88005894  
41.0273604  
31.76311773  
17.64617651  
110.7297576  
26.46926477  
92.20127229  
45.43890453  
556.736869  
119.9940003  
34.85119862  
192.7844784

114.7001473  
3.08808089  
30.43965449  
27.79272801  
29.11619125  
24.70464712  
442.4778761  
3.529235303  
34.4100442  
57.35007367  
159.256743  
31.76311773  
33.96888979  
131.0228606  
14.11694121  
77.64317666  
37.49812509  
18.96963975  
17.64617651  
8.823088257  
239.9880006  
12.79347797  
9.26424267  
114.2589929  
505.1218027  
1325.669011  
246.1641624  
496.7398689  
683.3481855  
91.31896346  
22.49887506  
3.529235303  
1.764617651  
152.1982724  
44.5565957  
22.49887506  
23.38118388  
14.99925004  
10.1465515  
15.44040445  
130.5817062  
560.2661043  
36.17466186

2.205772064  
48.085831  
78.9666399  
771.5790681  
7.499625019  
48.52698542  
107.2005223  
14.11694121  
1.323463239  
22.05772064  
18.96963975  
0.882308826  
183.9613902  
210.8718094  
8.381933844  
1.323463239  
8.381933844  
1.323463239  
24.70464712  
113.8178385  
69.26124282  
21.17541182  
44.11544129  
91.76011788  
44.11544129  
242.6349271  
5.293852954  
7.940779432  
127.9347797  
22.94002947  
21.17541182  
152.6394269  
207.342574  
86.46626492  
534.237994  
91.76011788  
5.735007367  
57.35007367  
33.52773538  
160.5802063  
123.5232356  
247.4876256  
16.76386769

81.61356638  
10.1465515  
83.37818403  
35.29235303  
49.40929424  
185.2848534  
3.970389716  
33.52773538  
8.823088257  
248.8110889  
7.940779432  
24.70464712  
0.882308826  
745.1098033  
121.758618  
13.6757868  
99.70089731  
1591.685122  
2.646926477  
125.7290077  
6.617316193  
78.08433108  
58.2323825  
3.529235303  
3.529235303  
502.9160307  
1.323463239  
5.735007367  
9.705397083  
14.11694121  
59.99700015  
17.64617651  
39.26274275  
92.6424267  
57.79122809  
44.11544129  
171.1679122  
38.38043392  
13.6757868  
4.411544129  
9.705397083  
1.323463239  
21.17541182

99.70089731  
28.67503684  
1.764617651  
217.4891255  
56.46776485  
28.23388242  
1.764617651  
3.08808089  
0.882308826  
10.1465515  
1.764617651  
37.49812509  
37.93927951  
23.82233829  
617.1750236  
164.550596  
101.465515  
162.7859783  
36.17466186  
12.79347797  
30.8808089  
15.44040445  
59.99700015  
224.9887506  
79.84894873  
68.37893399  
37.93927951  
29.55734566  
18.08733093  
1.323463239  
125.2878533  
67.05547076  
25.58695595  
106.7593679  
11.47001473  
120.4351547  
30.8808089  
6.617316193  
208.2248829  
55.14430161  
266.4572654  
62.20277221  
10.58770591

3.529235303  
498.0633321  
202.0487211  
153.9628901  
1.764617651  
83.37818403  
431.8901702  
246.6053168  
48.085831  
12.35232356  
10.1465515  
16.76386769  
89.1131914  
28.67503684  
29.99850007  
7.940779432  
51.61506631  
12.79347797  
676.7308693  
433.6547878  
12.35232356  
18.96963975  
183.5202358  
106.7593679  
345.8650597  
114.7001473  
30.43965449  
313.6607875  
169.844449  
35.73350744  
20.7342574  
48.085831  
37.05697068  
6.17616178  
157.4921254  
3.529235303  
582.323825  
358.6585377  
148.6690371  
50.29160307  
394.8331995  
15.44040445  
0.441154413



1.323463239  
2.205772064  
8.381933844  
2.646926477  
41.90966922  
369.2462436  
38.38043392  
154.8451989  
166.3152137  
98.37743407  
14.11694121  
5.735007367  
4.852698542  
86.02511051  
386.4512657  
2.646926477  
35.29235303  
322.0427214  
553.6487881  
791.8721711  
10.58770591  
1.764617651  
87.78972816  
104.5535958  
8.381933844  
0.441154413  
82.49587521  
61.7616178  
56.90891926  
63.08508104  
111.170912  
879.2207448  
2.205772064  
76.31971343  
199.842949  
36.61581627  
67.49662517  
51.61506631  
81.17241197  
164.1094416  
2.646926477  
4.852698542  
171.1679122

42.79197805  
66.61431634  
230.7237579  
4.852698542  
78.9666399  
5.293852954  
52.49737513  
11.02886032  
67.93777958  
131.464015  
290.2796037  
11.02886032  
7.499625019  
12.79347797  
19.85194858  
415.5674569  
57.35007367  
563.3541852  
11.47001473  
29.55734566  
1.764617651  
9.705397083  
114.2589929  
726.1401636  
22.49887506  
72.34932371  
4.852698542  
114.7001473  
168.5209857  
139.4047945  
52.49737513  
37.49812509  
234.2529932  
854.9572521  
133.2286327  
13.6757868  
122.6409268  
232.92953  
289.3972948  
66.61431634  
69.26124282  
14.55809562  
97.93627966

188.3729343  
35.73350744  
82.93702962  
14.55809562  
619.8219501  
0.441154413  
45.88005894  
11.02886032  
26.02811036  
12.79347797  
5.293852954  
29.11619125  
341.4535156  
0.441154413  
355.5704568  
160.1390519  
18.52848534  
159.256743  
480.4171556  
206.9014196  
3.529235303  
510.4156557  
44.5565957  
49.40929424  
33.08658097  
189.2552431  
12.35232356  
43.67428687  
418.2143834  
13.6757868  
2.205772064  
0.882308826  
745.9921122  
31.32196331  
180.4321549  
240.8703094  
94.84819877  
38.82158833  
142.0517209  
5.293852954  
83.81933844  
123.0820812  
22.05772064

804.2244947  
1.323463239  
404.5385966  
225.429905  
89.1131914  
23.38118388  
171.6090666  
174.2559931  
261.1634124  
56.46776485  
10.58770591  
164.550596  
7.058470606  
794.0779432  
20.7342574  
37.49812509  
11.47001473  
119.5528459  
12.35232356  
12.79347797  
245.723008  
106.3182135  
72.79047812  
9.705397083  
25.58695595  
201.6075667  
4.411544129  
109.8474488  
19.41079417  
67.49662517  
180.8733093  
7.499625019  
13.23463239  
16.32271328  
48.085831  
46.32121335  
197.637177  
80.29010314  
79.40779432  
20.7342574  
910.9838626  
108.96514  
577.4711264

87.34857375  
168.0798313  
23.82233829  
22.49887506  
71.02586047  
152.1982724  
18.08733093  
25.58695595  
481.2994644  
84.70164727  
13.6757868  
224.1064417  
1615.50746  
41.46851481  
81.61356638  
775.9906122  
28.23388242  
8.381933844  
53.82083837  
21.61656623  
77.20202225  
160.1390519  
211.7541182  
5.735007367  
3.970389716  
174.6971475  
1.764617651  
314.101942  
130.5817062  
158.3744342  
236.4587653  
83.37818403  
47.20352218  
6.17616178  
60.43815456  
75.87855901  
3.529235303  
268.221883  
5.293852954  
26.91041918  
997.8912819  
297.3380743  
897.7492302

26.91041918  
66.61431634  
146.4632651  
24.70464712  
7.058470606  
160.5802063  
58.67353691  
382.480876  
48.085831  
51.61506631  
14.11694121  
100.5832061  
132.7874783  
28.67503684  
109.8474488  
37.93927951  
164.9917504  
48.085831  
34.85119862  
1103.327187  
1649.035195  
222.7829785  
277.9272801  
1.323463239  
100.5832061  
15.44040445  
423.0670819  
350.2766038  
22.94002947  
426.5963172  
1080.828312  
1240.085055  
960.8343112  
739.8159504  
147.7867283  
6.17616178  
2324.883756  
143.8163386  
50.29160307  
6.17616178  
38.38043392  
29.55734566  
40.14505157

992.1562745  
438.9486408  
3.529235303  
258.0753315  
171.6090666  
8.381933844  
5.293852954  
1414.782202  
159.6978975  
0.441154413  
0.441154413  
39.26274275  
412.0382216  
157.9332798  
213.5187358  
748.6390386  
48.52698542  
507.7687292  
154.4040445  
40.14505157  
738.4924871

| <b>Spacer Sequence</b> | <b>Location</b> | <b>Strand</b> | <b>PAM</b> | <b>Reads Replicate 1</b> | <b>Reads Replicate 2</b> |
|------------------------|-----------------|---------------|------------|--------------------------|--------------------------|
| TTCAAAAGTTTAGTATCTAT   | 698             | -             | AGG        | 20913                    | 18997                    |
| GAGAACAAAACCATCCTACC   | 827             | +             | CGG        | 21295                    | 17109                    |
| TTAGAATTGACACCTCAAGA   | 873             | +             | AGG        | 13956                    | 17740                    |
| TTGATTTTCGTGCCACTGTGC  | 993             | -             | GGG        | 12816                    | 19034                    |
| AGCAATTCACACCCGCACAG   | 998             | +             | TGG        | 29015                    | 33743                    |
| TTTTAATAACCTCAACATCT   | 1070            | -             | TGG        | 27705                    | 14436                    |
| GTGAATTGCTAGTAGTGTGT   | 1181            | -             | TGG        | 17596                    | 15299                    |
| TCTGATGAATATTCATCTCT   | 1424            | -             | CGG        | 32678                    | 31754                    |
| AAACATGTTGCGATGATGTC   | 2048            | +             | AGG        | 30908                    | 59970                    |
| CGTTCCATTGAATACTGTGT   | 2368            | -             | AGG        | 52680                    | 43714                    |
| AGTAAGACGCCAAAAGTAAC   | 2465            | +             | AGG        | 14924                    | 14780                    |
| GTAGAAGTACAGTATAACAAC  | 2918            | +             | TGG        | 13903                    | 20869                    |
| TGAAGCATAATACTGCTACT   | 3088            | -             | AGG        | 23825                    | 23247                    |
| ATAAAAAAACTGCTACTTGT   | 3239            | +             | TGG        | 38980                    | 29511                    |
| CAATCCATTCATCTATTGCT   | 3503            | -             | TGG        | 34547                    | 34893                    |
| TGAAGAGAACACAGACGAAC   | 3540            | +             | AGG        | 13776                    | 17221                    |
| ATATCTGAATTGTTATCAGT   | 3651            | -             | TGG        | 12604                    | 16568                    |
| AGTATGCTTACTTTTTCTTG   | 3823            | -             | TGG        | 15478                    | 35193                    |
| GTCAGTATGTACAGATTAAT   | 4241            | +             | AGG        | 23623                    | 17749                    |
| GCGCTTCAATAGTGATAGTA   | 4338            | -             | GGG        | 23891                    | 21139                    |



| <b>Normalized Reads Replicate 1</b> | <b>Normalized Reads Replicate 2</b> |
|-------------------------------------|-------------------------------------|
| 8327.881099                         | 8380.610381                         |
| 8479.999427                         | 7547.71085                          |
| 5557.49575                          | 7826.079284                         |
| 5103.530061                         | 8396.933095                         |
| 11554.22321                         | 14885.87335                         |
| 11032.56089                         | 6368.505104                         |
| 7007.000231                         | 6749.221362                         |
| 13012.88665                         | 14008.41723                         |
| 12308.04519                         | 26456.03014                         |
| 20977.99342                         | 19284.624                           |
| 5942.96837                          | 6520.262222                         |
| 5536.390328                         | 9206.451442                         |
| 9487.484684                         | 10255.51664                         |
| 15522.44084                         | 13018.90788                         |
| 13757.15145                         | 15393.20093                         |
| 5485.816957                         | 7597.120144                         |
| 5019.108372                         | 7309.046312                         |
| 6163.579766                         | 15525.54725                         |
| 9407.045149                         | 7830.049674                         |
| 9513.766908                         | 9325.563134                         |

| Spacer Sequence      | Location | Strand | Reads Replicate 1 | Reads Replicate 2 |
|----------------------|----------|--------|-------------------|-------------------|
| CCTTGAATGAATTGAATGCC | 1698     | -      | 53                | 17                |
| TAGCTAGCACTTAATTGTGT | 4738     | +      | 2                 | 1                 |
| TACTTACTTCTATTTGACTC | 7908     | -      | 4                 | 1                 |
| GATTCATCAACGGTTACACC | 8733     | +      | 2                 | 1                 |
| TCGTTTTAACTTGTACTATA | 14939    | -      | 38                | 10                |
| TATTGGGCAGGCGTACCGAT | 15516    | +      | 2                 | 2                 |
| GCAGTAATGCAATCATTTTG | 16415    | +      | 4                 | 3                 |
| GATACATTGATGGAGAATTA | 16578    | +      | 72                | 64                |
| GTACGTTTCCAATATAGAAC | 16643    | +      | 1                 | 2                 |
| TATCTGTCGTTAAATATATT | 16706    | -      | 4                 | 4                 |
| TCATAAGTGATACCTTGCAT | 16916    | -      | 1                 | 1                 |
| ATGATGCAGGTATCTTATAT | 16932    | +      | 2                 | 1                 |
| GAGTGATGTCTGTTGTTACC | 17162    | -      | 1                 | 2                 |
| AGATATGCTGGGTTCTGTAT | 17282    | -      | 4                 | 2                 |
| CCGAAAGCGTTTAGAGATGC | 17375    | +      | 20                | 25                |
| TGGTTCCTTGATGTACTGCC | 17399    | +      | 58                | 64                |
| TATGAATCAGATAGAGGAAC | 17935    | +      | 14                | 15                |
| TAAGCGCAGTTAACACATCT | 18665    | +      | 1                 | 1                 |
| ATAAATTCGGAACAACGAGC | 19019    | +      | 2                 | 2                 |
| ACAAGAGTGCCGATTTACC  | 19144    | +      | 1                 | 3                 |
| TCATAACTTTCAACGCTACC | 19165    | -      | 3                 | 1                 |
| CACAACTATTCTATTTTGT  | 19389    | +      | 2                 | 3                 |
| TTGGTAAGTGGAECTTATCC | 19408    | +      | 167               | 147               |
| TTTAGTTATAGTAACTTTGT | 19628    | -      | 27                | 27                |
| CATTAAACTTTTTATGTGT  | 20081    | +      | 28                | 24                |
| ATTGAAATGAGGTGCATACA | 20683    | +      | 70                | 64                |
| TTGAAATGAGGTGCATACAT | 20684    | +      | 1                 | 1                 |
| GGAACAAGTAACTTCGCTAA | 22262    | +      | 3                 | 9                 |
| CGATTGTA CTGCTTGATGT | 22519    | -      | 26                | 17                |
| ACTAAAATGTGGCAAATTGA | 23261    | +      | 3                 | 1                 |
| ATCAATATCGCAAATGTTGA | 23327    | +      | 1                 | 2                 |
| CAACGACTCTAAAACGTATA | 23398    | +      | 74                | 59                |
| TAATTAAGGGGTGATTTTTA | 23838    | +      | 659               | 597               |
| CTATCCGGATATTTATTTTT | 23980    | -      | 57                | 44                |
| CAGAATCGAACAACCCGGCT | 25088    | +      | 2                 | 1                 |
| AATTTAAATCCACTTCATGC | 33574    | -      | 8                 | 10                |
| AATGATTTTCAAATTTCTT  | 34614    | -      | 10                | 4                 |
| GCTGTAGTGAAGTATAGAAA | 34894    | -      | 2173              | 2038              |
| ATAAAAAAACTGCTACTTGT | 34980    | +      | 689               | 730               |
| CAATCCATTCATCTATTGCT | 35263    | -      | 3877              | 3510              |
| TGAAGAGAACACAGACGAAC | 35281    | +      | 6386              | 6057              |
| AATAGAGCTAGGGAGTTTAA | 35450    | +      | 72                | 84                |

|                      |         |       |      |
|----------------------|---------|-------|------|
| AATAGTTTCTGTCACTGTTT | 35520 - | 12    | 17   |
| CAGAACTATTGAGTACGAG  | 35529 + | 23    | 10   |
| AGAACTATTGAGTACGAGG  | 35530 + | 10456 | 9904 |
| CACAACGAGCAACATGCGAT | 37179 + | 1142  | 992  |
| AATACCACTTGCATGACTCG | 37222 + | 2300  | 2268 |
| AGCACTCCTAATCGTCATCT | 37321 + | 772   | 684  |
| TGGGTAATAGACATCAAAAA | 37462 - | 81    | 77   |
| AAAGTTACATTACAGCCCT  | 37481 - | 2     | 1    |
| GAAAAACAAAGATTTGTTTC | 37588 - | 139   | 118  |
| TTAAAACCCCTAACCTTACT | 37700 + | 2898  | 2633 |
| TCGGTTGATTCTATATCTAA | 37738 + | 51    | 53   |
| TATTCATACCGTCATTCTTT | 37787 + | 683   | 653  |
| TAATTATTTCAACAAATGAA | 37898 + | 179   | 152  |
| AAAATAATAGCATCATCTA  | 37949 - | 14    | 13   |
| TAATTATGGATCCTATTTTA | 38247 - | 13    | 2    |
| ATAATTATGGATCCTATTTT | 38248 - | 100   | 81   |
| ATCGCTATTGCGTTAGATTG | 38275 - | 5     | 2    |
| TATCGCTATTGCGTTAGATT | 38276 - | 1894  | 1736 |
| CAAGATGGAATCAAGATTTT | 38860 + | 170   | 151  |
| CTTAGACCAGAAACACTTTT | 38952 + | 1     | 1    |
| CAAAAAGTGTCTGTTCTA   | 38954 - | 13    | 3    |
| CGACGAAAGTTATTGGGATT | 39047 + | 99    | 118  |
| GGATTGAAATGTGAGAGATG | 39147 + | 83    | 76   |
| TTAATATTGCAAGGTTCATA | 39438 + | 4     | 4    |
| GCAAAGCAGTCAAAGCTAA  | 39492 + | 1     | 1    |
| CAAAGCAGTCAAAGCTAAA  | 39493 + | 140   | 123  |
| AGTCAAAGCTAAAGGGCATA | 39500 + | 41    | 45   |
| TTGATACGATCCATCAACAT | 39543 - | 5     | 9    |
| TTTACTTGTACTAGATGATA | 39629 + | 80    | 81   |
| AGCATTGTTGATAACAGAGT | 39690 + | 10    | 6    |
| GCGAGAAAAGTAAGAGTAAT | 39804 + | 6     | 8    |
| AGTAATCGGAGACGATTTCA | 39818 + | 16    | 7    |
| AATGAAGTTTATTCGCTCAC | 40100 + | 27    | 22   |
| AACGATTCAAAGGCGCTCAC | 40170 + | 19    | 17   |
| CGATATTTGATATTTAGAGG | 40227 + | 1083  | 1011 |
| ATCATAAAGCGTATATACAA | 40368 + | 12    | 5    |
| ACTTTCCATTACTTAAATCA | 40443 + | 5690  | 5185 |
| ACGCATGTAATGGTCATGTG | 40548 + | 519   | 437  |
| TACTGATATTCAACTTCTGT | 40708 - | 59    | 55   |
| GGATATCGAAAAAGAAGCGC | 40740 + | 89    | 70   |
| TCATACTCTAGTAATTCGTC | 40786 - | 4     | 1    |
| ATGAATTGATAAAAAAGAAC | 40898 + | 5     | 1    |
| ACTCTTTTTGCAACCATTCC | 40930 - | 1     | 1    |

|                      |         |     |     |
|----------------------|---------|-----|-----|
| AAGAGGTTGAACTACGTAAG | 41084 + | 32  | 25  |
| AACATTCACGTGATCCGTAC | 41135 + | 17  | 21  |
| CAACCAGCACATTACACATA | 41262 + | 12  | 14  |
| TCGCCGTATGTGTAATGTGC | 41268 - | 1   | 1   |
| TCCTCATGACCATTCTTTAA | 41388 - | 243 | 212 |
| AGATAGAGTGTTTGACTTGT | 41432 + | 1   | 2   |
| CATATCGTACCAGATTGGCA | 41588 + | 8   | 2   |
| TTTTTCACACCTTGCCAATC | 41600 - | 152 | 139 |
| TAACTTTATTTTAGAGGAGA | 41694 + | 12  | 22  |
| ATTAGACGAGTTAATTAAT  | 41751 + | 124 | 126 |
| GTCGAACACTTATTTGTATT | 41854 - | 2   | 1   |
| ACTATGAAGGGGATATCAAT | 41890 - | 519 | 507 |
| AGTTTTATCGAGTTTAAAGA | 42330 + | 4   | 1   |
| GGAGAAGAAAGCAAGCGCAT | 42628 + | 3   | 2   |
| ATTCAACATTCAGTTAAAGA | 42912 + | 585 | 529 |

| Normalized Reads Replicate 1 | Normalized Reads Replicate 2 |
|------------------------------|------------------------------|
| 1170.4947                    | 403.9060087                  |
| 44.16961131                  | 23.75917698                  |
| 88.33922261                  | 23.75917698                  |
| 44.16961131                  | 23.75917698                  |
| 839.2226148                  | 237.5917698                  |
| 44.16961131                  | 47.51835396                  |
| 88.33922261                  | 71.27753095                  |
| 1590.106007                  | 1520.587327                  |
| 22.08480565                  | 47.51835396                  |
| 88.33922261                  | 95.03670793                  |
| 22.08480565                  | 23.75917698                  |
| 44.16961131                  | 23.75917698                  |
| 22.08480565                  | 47.51835396                  |
| 88.33922261                  | 47.51835396                  |
| 441.6961131                  | 593.9794246                  |
| 1280.918728                  | 1520.587327                  |
| 309.1872792                  | 356.3876547                  |
| 22.08480565                  | 23.75917698                  |
| 44.16961131                  | 47.51835396                  |
| 22.08480565                  | 71.27753095                  |
| 66.25441696                  | 23.75917698                  |
| 44.16961131                  | 71.27753095                  |
| 3688.162544                  | 3492.599016                  |
| 596.2897527                  | 641.4977785                  |
| 618.3745583                  | 570.2202476                  |
| 1545.936396                  | 1520.587327                  |
| 22.08480565                  | 23.75917698                  |
| 66.25441696                  | 213.8325928                  |
| 574.204947                   | 403.9060087                  |
| 66.25441696                  | 23.75917698                  |
| 22.08480565                  | 47.51835396                  |
| 1634.275618                  | 1401.791442                  |
| 14553.88693                  | 14184.22866                  |
| 1258.833922                  | 1045.403787                  |
| 44.16961131                  | 23.75917698                  |
| 176.6784452                  | 237.5917698                  |
| 220.8480565                  | 95.03670793                  |
| 47990.28269                  | 48421.20269                  |
| 15216.4311                   | 17344.1992                   |
| 85622.79152                  | 83394.71121                  |
| 141033.5689                  | 143909.335                   |
| 1590.106007                  | 1995.770866                  |

|             |             |
|-------------|-------------|
| 265.0176678 | 403.9060087 |
| 507.95053   | 237.5917698 |
| 230918.7279 | 235310.8888 |
| 25220.84806 | 23569.10357 |
| 50795.053   | 53885.8134  |
| 17049.46996 | 16251.27706 |
| 1788.869258 | 1829.456628 |
| 44.16961131 | 23.75917698 |
| 3069.787986 | 2803.582884 |
| 64001.76678 | 62557.91299 |
| 1126.325088 | 1259.23638  |
| 15083.92226 | 15514.74257 |
| 3953.180212 | 3611.394901 |
| 309.1872792 | 308.8693008 |
| 287.1024735 | 47.51835396 |
| 2208.480565 | 1924.493336 |
| 110.4240283 | 47.51835396 |
| 41828.62191 | 41245.93124 |
| 3754.416961 | 3587.635724 |
| 22.08480565 | 23.75917698 |
| 287.1024735 | 71.27753095 |
| 2186.39576  | 2803.582884 |
| 1833.038869 | 1805.697451 |
| 88.33922261 | 95.03670793 |
| 22.08480565 | 23.75917698 |
| 3091.872792 | 2922.378769 |
| 905.4770318 | 1069.162964 |
| 110.4240283 | 213.8325928 |
| 1766.784452 | 1924.493336 |
| 220.8480565 | 142.5550619 |
| 132.5088339 | 190.0734159 |
| 353.3568905 | 166.3142389 |
| 596.2897527 | 522.7018936 |
| 419.6113074 | 403.9060087 |
| 23917.84452 | 24020.52793 |
| 265.0176678 | 118.7958849 |
| 125662.5442 | 123191.3327 |
| 11462.01413 | 10382.76034 |
| 1303.003534 | 1306.754734 |
| 1965.547703 | 1663.142389 |
| 88.33922261 | 23.75917698 |
| 110.4240283 | 23.75917698 |
| 22.08480565 | 23.75917698 |

|             |             |
|-------------|-------------|
| 706.7137809 | 593.9794246 |
| 375.4416961 | 498.9427166 |
| 265.0176678 | 332.6284777 |
| 22.08480565 | 23.75917698 |
| 5366.607774 | 5036.94552  |
| 22.08480565 | 47.51835396 |
| 176.6784452 | 47.51835396 |
| 3356.890459 | 3302.525601 |
| 265.0176678 | 522.7018936 |
| 2738.515901 | 2993.6563   |
| 44.16961131 | 23.75917698 |
| 11462.01413 | 12045.90273 |
| 88.33922261 | 23.75917698 |
| 66.25441696 | 47.51835396 |
| 12919.61131 | 12568.60462 |

| Spacer Sequence        | Location | Strand | PAM   | Reads Replicate 1 | Reads Replicate 2 |
|------------------------|----------|--------|-------|-------------------|-------------------|
| GCATACACACATAAGTTTAT   | 237      | -      | TGGCG | 1                 | 1                 |
| ATTTGCTATCCTTGAATTGA   | 461      | +      | TGGCG | 1                 | 1                 |
| ACAACCCTCCTCATCACAAAT  | 2576     | +      | GGCAG | 1                 | 1                 |
| AAAAACCAACGTTTAATGAT   | 4197     | +      | TGGGG | 1                 | 1                 |
| AAAAACCAACGTTTAATGAT   | 4197     | +      | TGGGG | 1                 | 3                 |
| AAAAACCAACGTTTAATGAT   | 4197     | +      | TGGGG | 5724              | 7180              |
| AAAAACCAACGTTTAATGAT   | 4197     | +      | TGGGG | 16747             | 20989             |
| ATTGAAGAATTTGATGATAA   | 4433     | +      | CGGAG | 3                 | 1                 |
| TCTTGAAATCATATTTATA    | 4817     | -      | CGGCG | 30                | 33                |
| TCTTGAAATCATATTTATA    | 4817     | -      | CGGCG | 41                | 44                |
| TCTTGAAATCATATTTATA    | 4817     | -      | CGGCG | 368               | 395               |
| ACTTATTCCGTCGTTGCTAC   | 5238     | +      | TGGTG | 17                | 12                |
| ACTTATTCCGTCGTTGCTAC   | 5238     | +      | TGGTG | 30                | 52                |
| CACAACGAGCAACATGCGAT   | 5751     | +      | TGGCG | 1                 | 1                 |
| TGCTATGCATGCTGTAAAAG   | 5932     | +      | TGGAG | 78                | 98                |
| TTTTACAAAAGCTTTACCAT   | 5991     | +      | AGGCG | 1                 | 1                 |
| TTTTACAAAAGCTTTACCAT   | 5991     | +      | AGGCG | 248               | 291               |
| TTTTACAAAAGCTTTACCAT   | 5991     | +      | AGGCG | 662               | 742               |
| ATAACCAAATGTTCAAGAAA   | 9771     | +      | TGGAG | 1                 | 5                 |
| AACCAGCACATTACACATAC   | 9863     | +      | GGCGA | 1                 | 1                 |
| AGATAGAGTGTGTTGACTTGT  | 10032    | +      | GGGAG | 1                 | 1                 |
| GCACATATCCATGTAGTGAA   | 10146    | +      | TGGCG | 1                 | 1                 |
| TTTTTCAATATCAACTATGA   | 10484    | -      | AGGGG | 16                | 12                |
| ATTTGAATCATCACATTTAT   | 11324    | +      | TGGAG | 4                 | 3                 |
| ATTTGAATCATCACATTTAT   | 11324    | +      | TGGAG | 16                | 20                |
| AAGAGAACGCAACAAAGAGC   | 11476    | +      | TGGAG | 1                 | 1                 |
| ATTAACAATAAAAACCTTTTA  | 11599    | +      | TGGAG | 6                 | 1                 |
| ATTAACAATAAAAACCTTTTA  | 11599    | +      | TGGAG | 1563              | 1977              |
| ATTAACAATAAAAACCTTTTA  | 11599    | +      | TGGAG | 1892              | 2376              |
| CAACGTTGCCGAAACCACAA   | 13942    | +      | GGGGA | 1                 | 4                 |
| TATTCGACTAAAGGTAAGAG   | 14663    | +      | TGGGG | 6                 | 7                 |
| CGTTCATAGAACATACCTGA   | 15671    | -      | TGGTG | 1                 | 1                 |
| CGTTCATAGAACATACCTGA   | 15671    | -      | TGGTG | 102               | 125               |
| TTAATAGGACGAGGTATAGA   | 15867    | +      | TGGTA | 1                 | 1                 |
| TATGTTTGGCACCCTACAAA   | 16170    | +      | CGGAG | 6                 | 4                 |
| CCTAACAACAAGAGATGAT    | 16985    | +      | AGGAG | 1                 | 3                 |
| GATACTCATCGTCATTTAGA   | 18363    | +      | TGGGG | 2                 | 8                 |
| AAGAAATCGTTAGCACTAAT   | 20219    | +      | GGGTG | 1                 | 1                 |
| AACGCTTAAACCAACTGAAT   | 20431    | +      | AGGAG | 1                 | 1                 |
| CGCTCTTATCAGACGTAGTA   | 20564    | -      | CGGCG | 19                | 26                |
| TTTAGTTGTTTCAAGATGTAGT | 21085    | -      | AGGCG | 23                | 31                |
| CTAAAAAACCTAAGTCAACA   | 21415    | -      | GGAGC | 1                 | 1                 |



|                       |         |       |    |    |
|-----------------------|---------|-------|----|----|
| TTTTCTAATTGTTCTCGAGT  | 22997 - | TGGTG | 19 | 13 |
| TAGCACTAACACCTGCTGAA  | 23328 + | TGGCG | 1  | 2  |
| GAATGGCGTGATTGGCTTAT  | 23345 + | TGGTG | 8  | 3  |
| AGATGCAAACCCCGCTAAAA  | 23986 + | TGGCG | 1  | 4  |
| AACAACCTCATTGAAAGATTA | 24206 + | CGGCG | 3  | 1  |
| GCGATCAGTTAAAAACTACA  | 24537 + | TGGCG | 3  | 1  |
| GCTTTAATTCAGTTGCTTAC  | 25886 + | TGGCG | 12 | 20 |
| TTTGACACAACACAAACATC  | 27196 + | AGGGG | 1  | 1  |
| TTGACACAACACAAACATCA  | 27197 + | GGGGA | 2  | 1  |
| CATTTTACAACACTAACTCA  | 27368 + | GGAGA | 1  | 1  |
| AGCTTTTAGGAAAGCGAGCA  | 29512 + | TGGAG | 1  | 1  |
| GTACGTTTCCAATATAGAAC  | 30329 + | TGGAG | 6  | 8  |
| GGACGCAAAGCGCTTTAAT   | 30809 + | AGGGG | 2  | 4  |
| GAAGTTGAACAACAAATCAA  | 32221 + | TGGCG | 1  | 1  |
| GTTATCGGATTCGTTAATAC  | 33381 + | TGGCG | 2  | 4  |
| TTAATTTAACACAAAGTAGG  | 33919 + | TGGCG | 1  | 1  |
| ACTTTATTTTTAAAAGATAT  | 34509 + | TGGGG | 1  | 4  |
| AACTTCGCTAATGGTAGATA  | 35924 + | CGGTG | 1  | 1  |
| CGACACAAATGATTTAGGGT  | 38155 + | AGGTG | 1  | 1  |
| CGACACAAATGATTTAGGGT  | 38155 + | AGGTG | 10 | 10 |
| CGCTAACATAAAGAACATAT  | 38272 - | TGGCG | 12 | 9  |
| TGCTAAAGTCATATATACTA  | 39930 - | CGGGG | 7  | 7  |
| TGCTAAAGTCATATATACTA  | 39930 - | CGGGG | 7  | 9  |
| CATCCCCGTATAACAGTTTA  | 39967 + | CCAGG | 14 | 14 |

| <b>Normalized Reads Replicate 1</b> | <b>Normalized Reads Replicate 2</b> |
|-------------------------------------|-------------------------------------|
| 36.04772719                         | 28.91844997                         |
| 36.04772719                         | 28.91844997                         |
| 36.04772719                         | 28.91844997                         |
| 36.04772719                         | 28.91844997                         |
| 36.04772719                         | 86.75534991                         |
| 206337.1904                         | 207634.4708                         |
| 603691.2873                         | 606969.3464                         |
| 108.1431816                         | 28.91844997                         |
| 1081.431816                         | 954.308849                          |
| 1477.956815                         | 1272.411799                         |
| 13265.56361                         | 11422.78774                         |
| 612.8113622                         | 347.0213997                         |
| 1081.431816                         | 1503.759398                         |
| 36.04772719                         | 28.91844997                         |
| 2811.722721                         | 2834.008097                         |
| 36.04772719                         | 28.91844997                         |
| 8939.836343                         | 8415.268942                         |
| 23863.5954                          | 21457.48988                         |
| 36.04772719                         | 144.5922499                         |
| 36.04772719                         | 28.91844997                         |
| 36.04772719                         | 28.91844997                         |
| 36.04772719                         | 28.91844997                         |
| 576.7636351                         | 347.0213997                         |
| 144.1909088                         | 86.75534991                         |
| 576.7636351                         | 578.3689994                         |
| 36.04772719                         | 28.91844997                         |
| 216.2863631                         | 28.91844997                         |
| 56342.5976                          | 57171.77559                         |
| 68202.29984                         | 68710.23713                         |
| 36.04772719                         | 115.6737999                         |
| 216.2863631                         | 202.4291498                         |
| 36.04772719                         | 28.91844997                         |
| 3676.868173                         | 3614.806246                         |
| 36.04772719                         | 28.91844997                         |
| 216.2863631                         | 115.6737999                         |
| 36.04772719                         | 86.75534991                         |
| 72.09545438                         | 231.3475998                         |
| 36.04772719                         | 28.91844997                         |
| 36.04772719                         | 28.91844997                         |
| 684.9068166                         | 751.8796992                         |
| 829.0977254                         | 896.4719491                         |
| 36.04772719                         | 28.91844997                         |

|             |             |
|-------------|-------------|
| 684.9068166 | 375.9398496 |
| 36.04772719 | 57.83689994 |
| 288.3818175 | 86.75534991 |
| 36.04772719 | 115.6737999 |
| 108.1431816 | 28.91844997 |
| 108.1431816 | 28.91844997 |
| 432.5727263 | 578.3689994 |
| 36.04772719 | 28.91844997 |
| 72.09545438 | 28.91844997 |
| 36.04772719 | 28.91844997 |
| 36.04772719 | 28.91844997 |
| 216.2863631 | 231.3475998 |
| 72.09545438 | 115.6737999 |
| 36.04772719 | 28.91844997 |
| 72.09545438 | 115.6737999 |
| 36.04772719 | 28.91844997 |
| 36.04772719 | 115.6737999 |
| 36.04772719 | 28.91844997 |
| 36.04772719 | 28.91844997 |
| 360.4772719 | 289.1844997 |
| 432.5727263 | 260.2660497 |
| 252.3340903 | 202.4291498 |
| 252.3340903 | 260.2660497 |
| 504.6681807 | 404.8582996 |

| Sample | Oligo                          | Number of Reads |             |             |
|--------|--------------------------------|-----------------|-------------|-------------|
|        |                                | Replicate 1     | Replicate 2 | Replicate 3 |
| 1      | CACATCAATTAGTAAGACGCCAAAAGTAAC | 37              | 41          | 29          |
|        | ATAATAATGAACATGTCTTGTCACAGTTTC | 5               | 1           | 3           |

| Percent Acquired |             |             | Percent Acquired | St. Dev.    |
|------------------|-------------|-------------|------------------|-------------|
| Replicate 1      | Replicate 2 | Replicate 3 |                  |             |
| 88.095238        | 97.619048   | 90.625      | 92.11309524      | 4.933209659 |
| 11.904762        | 2.3809524   | 9.375       | 7.886904762      | 4.933209659 |

**Sample****Oligo**

A

TTAACCAAGCAATAGATGAATGGATTGAAGAGAACACAGACGAACAGGACAGACTAATTA  
TTCCATTCCCTATAAAGAAATTATCGAATACTTAAATAAAAAAGCAGGAAAGCATT  
TTCCATTCCCTATAAATGAATGGATTGAAGAGAACACAGACGAACAGGAAAGCATT  
TTAACCAAGCAATAGAGAAATTATCGAATACTTAAATAAAAAAGCAGGACAGACTAAT

B

| Number of Reads |             |             | Percent Acquired |             |             | Percent Acquired |
|-----------------|-------------|-------------|------------------|-------------|-------------|------------------|
| Replicate 1     | Replicate 2 | Replicate 3 | Replicate 1      | Replicate 2 | Replicate 3 |                  |
| 284             | 278         | 268         | 98.269896        | 98.932384   | 96.750903   | 97.98439435      |
| 5               | 3           | 9           | 1.7301038        | 1.0676157   | 3.2490975   | 2.015605646      |
| 84              | 82          | 70          | 98.823529        | 98.795181   | 98.591549   | 98.73675314      |
| 1               | 1           | 1           | 1.1764706        | 1.2048193   | 1.4084507   | 1.263246857      |

**St. Dev.**

1.1184137

1.1184137

0.1265466

0.1265466



| Sample | Oligo                          | Number of Reads |             |             |
|--------|--------------------------------|-----------------|-------------|-------------|
|        |                                | Replicate 1     | Replicate 2 | Replicate 3 |
| 1      | AGAAATTATCTGAAGAGAACACAGACGAAC | 158             | 90          | 140         |
|        | ATGAATGGATGAATACTTAAATAAAAAAGC | 4               | 10          | 0           |
| 2      | ATGAATGGATGAATACTTAAACAGACGAAC | 5               | 14          | 8           |
|        | AGAAATTATCTGAAGAGAACATAAAAAAGC | 1               | 3           | 1           |
| 3      | AGAAATTATCGAATACTTAAACAGACGAAC | 33              | 45          | 32          |
|        | ATGAATGGATTGAAGAGAACATAAAAAAGC | 0               | 1           | 0           |
| 4      | AGAAATTATCGAATAAGAACACAGACGAAC | 49              | 52          | 72          |
|        | ATGAATGGATTGAAGCTTAAATAAAAAAGC | 2               | 1           | 4           |

| Percent Acquired |             |             | Percent Acquired | St. Dev.    |
|------------------|-------------|-------------|------------------|-------------|
| Replicate 1      | Replicate 2 | Replicate 3 |                  |             |
| 97.530864        | 90          | 100         | 95.8436214       | 5.20913536  |
| 2.4691358        | 10          | 0           | 4.156378601      | 5.20913536  |
| 83.333333        | 82.352941   | 88.888889   | 84.8583878       | 3.524768995 |
| 16.666667        | 17.647059   | 11.111111   | 15.1416122       | 3.524768995 |
| 100              | 97.826087   | 100         | 99.27536232      | 1.255109281 |
| 0                | 2.173913    | 0           | 0.724637681      | 1.255109281 |
| 96.078431        | 98.113208   | 94.736842   | 96.30949367      | 1.700000953 |
| 3.9215686        | 1.8867925   | 5.2631579   | 3.690506325      | 1.700000953 |

| Sample | Oligo                          | Number of Reads |             |             |
|--------|--------------------------------|-----------------|-------------|-------------|
|        |                                | Replicate 1     | Replicate 2 | Replicate 3 |
| 1      | ATAATAATGAACATGTCTTGACAGACGAAC | 199             | 120         | 186         |
|        | ATAATAATGAACATGTCTTGTCACAGTTTC | 10              | 21          | 6           |
| 2      | ATAATAATGATGAAGAGAACTCACAGTTTC | 17              | 10          | 21          |
|        | ATAATAATGAACATGTCTTGTCACAGTTTC | 15              | 8           | 17          |
| 3      | ATGAATGGATACATGTCTTGTCACAGTTTC | 42              | 31          | 47          |
|        | ATAATAATGAACATGTCTTGTCACAGTTTC | 38              | 21          | 31          |

| Percent Acquired |             |             | Percent Acquired | St. Dev.    |
|------------------|-------------|-------------|------------------|-------------|
| Replicate 1      | Replicate 2 | Replicate 3 |                  |             |
| 95.215311        | 85.106383   | 96.875      | 92.39889799      | 6.369789897 |
| 4.784689         | 14.893617   | 3.125       | 7.601102005      | 6.369789897 |
| 53.125           | 55.555556   | 55.263158   | 54.64790448      | 1.326952391 |
| 46.875           | 44.444444   | 44.736842   | 45.35209552      | 1.326952391 |
| 52.5             | 59.615385   | 60.25641    | 57.45726496      | 4.305065082 |
| 47.5             | 40.384615   | 39.74359    | 42.54273504      | 4.305065082 |

| Oligo                           | Number of Reads |             |             | P          |
|---------------------------------|-----------------|-------------|-------------|------------|
|                                 | Replicate 1     | Replicate 2 | Replicate 3 |            |
| AGAAATTATCGAATACTTAAACCGATCAGT  | 73              | 12          | 34          | 94.8051948 |
| AGAAATTATCGAATACTTAAATTAATGACTA | 4               | 2           | 1           | 5.19480519 |

| Percent Acquired |             | Percent Acquired | St. Dev.   |
|------------------|-------------|------------------|------------|
| Replicate 2      | Replicate 3 |                  |            |
| 85.7142857       | 97.1428571  | 92.55411255      | 6.03768082 |
| 14.2857143       | 2.85714286  | 7.445887446      | 6.03768082 |

| <b>Bin (kb)</b> | <b>Sum Normalized Reads Early Time Point</b> | <b>Sum Normalized Reads Late Time Point</b> |
|-----------------|----------------------------------------------|---------------------------------------------|
| 1               | 81931.3392                                   | 102354.9272                                 |
| 2               | 73873.75101                                  | 74019.40905                                 |
| 3               | 73586.87689                                  | 81927.32451                                 |
| 4               | 109057.9906                                  | 131249.2337                                 |
| 5               | 44594.90213                                  | 43411.01355                                 |
| 6               | 37122.5188                                   | 31289.78714                                 |
| 7               | 20495.82662                                  | 21002.89533                                 |
| 8               | 23217.73956                                  | 24117.49172                                 |
| 9               | 16758.12268                                  | 15068.4221                                  |
| 10              | 14606.47516                                  | 15603.63283                                 |
| 11              | 8009.928594                                  | 10157.21521                                 |
| 12              | 28598.87474                                  | 24409.85354                                 |
| 13              | 21030.16403                                  | 19376.04331                                 |
| 14              | 8686.236614                                  | 14761.91374                                 |
| 15              | 18536.28394                                  | 15134.43928                                 |
| 16              | 39025.05328                                  | 33041.60026                                 |
| 17              | 39171.42323                                  | 31563.2869                                  |
| 18              | 42283.77826                                  | 37443.53173                                 |
| 19              | 10817.4455                                   | 12104.72211                                 |
| 20              | 8505.680062                                  | 9980.383466                                 |
| 21              | 21870.34775                                  | 26755.8213                                  |
| 22              | 17644.5912                                   | 14283.28916                                 |
| 23              | 13530.83471                                  | 9886.073204                                 |
| 24              | 28711.42471                                  | 17812.85072                                 |
| 25              | 15091.86983                                  | 15575.33975                                 |
| 26              | 11537.28873                                  | 8245.074647                                 |
| 27              | 6069.724708                                  | 6356.511652                                 |
| 28              | 9126.721279                                  | 8954.759367                                 |
| 29              | 8892.639333                                  | 6229.192798                                 |
| 30              | 3972.427456                                  | 3366.87635                                  |
| 31              | 13093.7412                                   | 10140.71091                                 |
| 32              | 10523.78906                                  | 8881.668914                                 |
| 33              | 8087.192134                                  | 6658.30449                                  |
| 34              | 3972.152497                                  | 3576.716683                                 |
| 35              | 6972.324163                                  | 4868.767271                                 |
| 36              | 2243.758861                                  | 2619.467524                                 |
| 37              | 16088.59699                                  | 9770.543133                                 |
| 38              | 11841.57693                                  | 9431.02619                                  |
| 39              | 10994.15263                                  | 10588.68465                                 |
| 40              | 11147.94648                                  | 9706.883706                                 |
| 41              | 11542.87957                                  | 6552.205445                                 |

| Spacer                | Location | PAM | Reads Sonication | Barcodes Sonication |
|-----------------------|----------|-----|------------------|---------------------|
| AGTATGCTTACTTTTTCTTG  | 3823     | TGG | 44061            | 4852                |
| TTGATTTTCGTGCCACTGTGC | 993      | GGG | 39319            | 6526                |
| GTCAGTATGTACAGATTAAT  | 4241     | AGG | 35094            | 4111                |
| TTCAAAGTTTAGTATCTAT   | 698      | AGG | 27625            | 5785                |
| AAACATGTTGCGATGATGTC  | 2048     | AGG | 24648            | 4609                |
| CAATCCATTCATCTATTGCT  | 3503     | TGG | 22350            | 4201                |
| ATAAAAAAAGTCTACTTGT   | 3239     | TGG | 20101            | 4663                |
| TCTGATGAATATTCATCTCT  | 1424     | CGG | 19122            | 3176                |
| TTTTAATAACCTCAACATCT  | 1070     | TGG | 16000            | 4491                |
| CGTTCCATTGAATACTGTGT  | 2368     | AGG | 15253            | 3594                |
| GAGAACAAAACCATCCTACC  | 827      | CGG | 15152            | 3299                |
| AGTAAGACGCCAAAAGTAAC  | 2465     | AGG | 14789            | 1240                |
| AGTGTATAACCTGCTGGCAC  | 39327    | TGG | 14730            | 1785                |
| GTAGAAGTACAGTATAACAAC | 2918     | TGG | 14650            | 2434                |
| ACTTTCCATTACTTAAATCA  | 9043     | TGG | 14293            | 3738                |
| ATTTCCATAATTTCCATCTGC | 24053    | TGG | 14049            | 3496                |
| TTAGAATTGACACCTCAAGA  | 873      | AGG | 13663            | 1490                |
| TGAAGAGAACACAGACGAAC  | 3540     | AGG | 13246            | 1840                |
| TATATGACGCAAGCTCGTCC  | 30146    | AGG | 13111            | 2801                |
| AGCAATTCACACCCGCACAG  | 998      | TGG | 12651            | 3690                |
| GTGAATTGCTAGTAGTGTGT  | 1181     | TGG | 12033            | 3482                |
| TCTAAAAAACCTAAGTCAAC  | 21416    | AGG | 11534            | 2703                |
| GCTAAGTATTTAAGACATGC  | 38827    | AGG | 11424            | 2724                |
| TCACTATAACAATTGCTTGT  | 12254    | TGG | 11418            | 1405                |
| GGATATCGAAAAAGAAGCGC  | 9340     | TGG | 11240            | 2529                |
| CTTTATCTAACATGATACAC  | 805      | GGG | 10637            | 2464                |
| GAATGATAACGATCTAATTC  | 19068    | AGG | 10415            | 2541                |
| TGAAGCATAATACTGCTACT  | 3088     | AGG | 10205            | 2367                |
| TCCAATTGATCCGTGCCAGT  | 7596     | TGG | 10099            | 2496                |
| CCTATTACAGATTCATCGTC  | 11132    | TGG | 9938             | 1670                |
| TTTGTCTATCCAGTGCTTGC  | 35592    | TGG | 9798             | 1420                |
| CCATTTTCGTTATCTCCTTTC | 6863     | TGG | 9569             | 1376                |
| TAGAGATATAGAACTTCACT  | 5384     | GGG | 9521             | 3021                |
| ATCTTTAATGCGATGTCAGC  | 24590    | AGG | 9396             | 2053                |
| GGATCTAAGTCAGTTTCAGC  | 22166    | TGG | 9203             | 169                 |
| GCGCTTCAATAGTGATAGTA  | 4338     | GGG | 8628             | 1340                |
| ATTAAGTACCTTGTCTGC    | 19588    | TGG | 8417             | 1830                |
| CATATTAGATCGAGTCAAGG  | 12415    | AGG | 8093             | 1988                |
| CAATGTTGACTGATGACTAT  | 17902    | AGG | 7997             | 1602                |
| GGAAGAATACACGATGTTGT  | 10947    | AGG | 7888             | 971                 |
| ATAAAAGTAAATGTTGATAC  | 18643    | TGG | 7653             | 1857                |
| TTACGTGCTCTCATTACAGT  | 18512    | TGG | 7613             | 2094                |
| AAGATTTAATAGATCTTAGC  | 24027    | AGG | 7606             | 775                 |
| CTTGATGTAATCTTTGTGT   | 13373    | TGG | 7462             | 298                 |



|                       |       |     |      |      |
|-----------------------|-------|-----|------|------|
| ATACGTATGCACATTACACA  | 18135 | AGG | 7336 | 1474 |
| GCTTTAATTCAGTTGCTTAC  | 25886 | TGG | 7230 | 1240 |
| TACATTGATTATTCACCAAC  | 2983  | AGG | 7224 | 1549 |
| CGTCAATATATGCTTTCCGT  | 14619 | TGG | 7213 | 731  |
| TCATAACTTTCAACGCTACC  | 32832 | TGG | 7146 | 1438 |
| AGAAACTATTGAGTACGAGG  | 3789  | AGG | 7075 | 1001 |
| ACTTATTCCGTCGTTGCTAC  | 5238  | TGG | 7000 | 1291 |
| CTAAATTCAGTGATGTATTC  | 15995 | AGG | 6990 | 1531 |
| TTAATTATGCTCGTAAGAAT  | 1241  | CGG | 6736 | 846  |
| ATATTAATCAGAGTGCCTGT  | 2982  | TGG | 6369 | 519  |
| AACACCTATTAACGTAGTAT  | 1449  | TGG | 6367 | 1370 |
| CGATTGTACTTGCTTGATGT  | 36132 | TGG | 6269 | 686  |
| AGGCTTACCATGAATCGCAC  | 39247 | CGG | 6156 | 1340 |
| AATGAAGTTTATTTCGCTCAC | 8700  | AGG | 6126 | 1583 |
| TTGATACGATCCATCAACAT  | 8124  | TGG | 6029 | 1907 |
| GTTCCGTTTCCTACTGCTCC  | 38745 | AGG | 5924 | 76   |
| TCGCCGTATGTGTAATGTGC  | 9849  | TGG | 5909 | 736  |
| AAAAATCCACCAGTGCCAGC  | 39334 | AGG | 5796 | 1603 |
| AAGAGAACGCAACAAAGAGC  | 11476 | TGG | 5774 | 1036 |
| ATTTCTGCTTGTGCATATTC  | 19753 | AGG | 5731 | 549  |
| TTTTGTATGCGTCAATGAGT  | 12308 | TGG | 5515 | 503  |
| TGGTTCTTTGATGTACTGCC  | 31085 | TGG | 5512 | 611  |
| TGTCCTTTACCTGTTACTTT  | 2458  | TGG | 5366 | 966  |
| CATTGGAAACGTTTAAGAAC  | 12011 | TGG | 5288 | 905  |
| GAGTGATGTCTGTTGTTACC  | 30829 | AGG | 5223 | 1376 |
| TGTTGTATCTGATTCACACA  | 22667 | CGG | 5213 | 315  |
| TATCTTCCGTGCCATCTTCT  | 8632  | CGG | 5202 | 1495 |
| ACGCAATTTTTCGTACCTTC  | 14720 | CGG | 5133 | 828  |
| TACTGATATTCAACTTCTGT  | 9289  | AGG | 5005 | 437  |
| TTTTGTTCTTCTGATTGCTC  | 19161 | AGG | 4972 | 1394 |
| GAGTATAACGAAAGTTTTAC  | 28034 | AGG | 4857 | 1139 |
| ATTAGAGCCTCAATATGCTT  | 16315 | AGG | 4793 | 949  |
| GTGTATATTTGCCAATTGTC  | 7002  | AGG | 4620 | 631  |
| ACCAACTGGCACGGATCAAT  | 7611  | TGG | 4605 | 96   |
| TTTGATACCAATGATCTTAT  | 4917  | TGG | 4582 | 256  |
| ATTCACATTCCAGCAAGCAC  | 35599 | TGG | 4582 | 705  |
| AATCACGGAGCAAAGCGTAC  | 15147 | AGG | 4519 | 1056 |
| AAATTCCACTTTGTTATTAC  | 4283  | AGG | 4411 | 734  |
| ACTCATCGTTTGAATCGTCT  | 32540 | GGG | 4387 | 30   |
| CGACTTAAGCAGGTGCCATA  | 21278 | TGG | 4315 | 501  |
| GTGAAACACGCTGTACAAAC  | 22371 | AGG | 4179 | 558  |
| TGCCAAACTGCGATGTCTCC  | 34612 | AGG | 4154 | 123  |
| GACCATTATTTGATGCTAAC  | 20142 | GGG | 4151 | 922  |
| TCCGATAAAATAACATTGCC  | 19546 | TGG | 4144 | 563  |
| ACTTTATCTAACATGATACA  | 804   | CGG | 4139 | 312  |

|                       |       |     |      |      |
|-----------------------|-------|-----|------|------|
| GCAACTCCAACATACACGCC  | 19544 | AGG | 4134 | 878  |
| CCGAAAGCGTTTAGAGATGC  | 31061 | AGG | 4090 | 716  |
| TCAAAGTGATGTGTTAGCTA  | 4405  | GGG | 4079 | 598  |
| CTCTATTATCTCTTCGTACA  | 18682 | AGG | 4035 | 1119 |
| GGATTACCACTATCTTATAC  | 20177 | TGG | 4014 | 709  |
| GAAGTAAAATCGAATACACC  | 31385 | GGG | 4001 | 275  |
| CATATCGTACCAGATTGGCA  | 10188 | AGG | 3996 | 264  |
| TTTTCTAATTGTTCTCGAGT  | 22997 | TGG | 3987 | 892  |
| CCCTATAATGTTATTTTTGT  | 16769 | TGG | 3939 | 1055 |
| GAAAAATCGCCATCAATTCA  | 454   | AGG | 3913 | 584  |
| GATTCTTCTAACTTATTAAC  | 17482 | TGG | 3875 | 821  |
| CACAACGAGCAACATGCGAT  | 5751  | TGG | 3873 | 461  |
| ACAAGTTTACATTCAATGAC  | 29648 | AGG | 3853 | 737  |
| CTTTATACTCGTAACCATTC  | 7796  | GGG | 3693 | 641  |
| TATATTTGATTTGTAAGTTC  | 21725 | AGG | 3691 | 678  |
| GATTGGGATTACGCACGTTA  | 20243 | CGG | 3654 | 776  |
| TACTCATCGTTTGAATCGTC  | 32541 | TGG | 3652 | 24   |
| GTTTAAGATATAGAATGCTT  | 10634 | TGG | 3633 | 714  |
| TACCATACCGCGTAACACA   | 17082 | AGG | 3620 | 429  |
| ATATCTGAATTGTTATCAGT  | 3651  | TGG | 3615 | 1027 |
| TACAAGTGTACTTACAAGTA  | 1966  | CGG | 3614 | 319  |
| TGCGTCCTGCGTCAATTGCA  | 21646 | GGG | 3603 | 249  |
| AATACAAAATCTACGGCACA  | 32585 | TGG | 3564 | 475  |
| CGTGTAGTTAATACTCCGTT  | 20059 | TGG | 3494 | 653  |
| GCATATAATTACTTCGGTAT  | 35948 | TGG | 3489 | 611  |
| GCAATACATGCAATCAGTTT  | 25972 | GGG | 3468 | 912  |
| ATTGGTCGACGTTTGAATAT  | 16411 | TGG | 3455 | 45   |
| TAAATATAACATTGAATCC   | 22901 | TGG | 3443 | 949  |
| GAAAATACAGATCCTAAAGC  | 15585 | AGG | 3416 | 798  |
| GTTGATTCTTCTATGCTATC  | 37542 | CGG | 3407 | 483  |
| CATTATGAAGCAGTCGGCAG  | 5667  | AGG | 3373 | 829  |
| CGGAAAGCCTCACGCAGACC  | 5642  | TGG | 3346 | 147  |
| ACTACAGTACCGTTTTTACC  | 36838 | GGG | 3302 | 571  |
| GTTCTGAAACTTGTCCCTTC  | 17520 | AGG | 3290 | 528  |
| AACAATTGATGGATTTGTGT  | 2871  | AGG | 3275 | 581  |
| GCATACACACATAAGTTTAT  | 237   | TGG | 3236 | 757  |
| TCACGATGTTTTTGTAAGTGT | 18080 | TGG | 3233 | 728  |
| GAAACACTTTCTTCATCTAC  | 37945 | TGG | 3217 | 241  |
| ATGATGATGTGTATGTTACA  | 17827 | TGG | 3206 | 830  |
| TCTACTACGTCCGTAATGCT  | 4546  | AGG | 3169 | 568  |
| AATAAGGAGTTAACTCGTAT  | 17877 | AGG | 3159 | 491  |
| AAGAGAGTTATATAAAGCTT  | 1876  | TGG | 3140 | 30   |
| GAAACAATCTTTATAAACGC  | 1308  | AGG | 3111 | 114  |
| AACAAAACGGTATAAACATC  | 2289  | GGG | 3102 | 279  |
| GGACAAAATCAATCAATAG   | 7069  | TGG | 3099 | 474  |

|                       |       |     |      |      |
|-----------------------|-------|-----|------|------|
| GTAAGATGACAGCTATGTTG  | 17376 | AGG | 3091 | 126  |
| TTATCGAGTGATAACCTGC   | 39333 | TGG | 3072 | 520  |
| ATTGAATTAGTTACTCGATT  | 4866  | AGG | 3020 | 10   |
| ATAATACTGCTCGTGCAACA  | 32531 | TGG | 3010 | 925  |
| TAGGAGTGAACATATAGCC   | 40022 | GGG | 3004 | 417  |
| GAAAAACAAAGATTTGTTTC  | 6141  | GGG | 2990 | 372  |
| AAAAATAATCATGCGAGTTG  | 9227  | AGG | 2969 | 850  |
| CGTCTATCTGTCTTTCCCTC  | 34085 | TGG | 2944 | 505  |
| TTCTATACTTCACTACAGCA  | 3154  | TGG | 2928 | 630  |
| AATTTTTCGTATTCAACTGT  | 22586 | AGG | 2927 | 352  |
| GAATTAGCTATCATAACTTC  | 1365  | TGG | 2927 | 696  |
| ATTTTCAGCATCTTTCGGTA  | 2681  | TGG | 2917 | 624  |
| AAGTAGCGCAATGAGTATGT  | 16792 | AGG | 2915 | 288  |
| ATGCCTAGTTTAATTGATAC  | 13233 | TGG | 2899 | 766  |
| TCGCCTCTATATGTGTTTTTC | 2817  | TGG | 2861 | 648  |
| GACTCTTATTACAGTCTTGT  | 20536 | CGG | 2819 | 625  |
| TCTTTTCTGCTAATTCATCA  | 14170 | CGG | 2818 | 569  |
| ACATTTTACAACACTAACTC  | 27367 | AGG | 2808 | 197  |
| TCATCAACACCATCTTGTC   | 32421 | AGG | 2799 | 1024 |
| ACTATTTCTAATGGCAAAGT  | 16622 | TGG | 2796 | 790  |
| CGCTCTTATCAGACGTAGTA  | 20564 | CGG | 2788 | 512  |
| CTTGATTAAGCAAGGTATAC  | 35377 | CGG | 2772 | 379  |
| AACATTCACGTGATCCGTAC  | 9735  | TGG | 2762 | 448  |
| GTTTACCCATATATTGTTGT  | 21840 | GGG | 2751 | 671  |
| CGTTCATAGAACATACCTGA  | 15671 | TGG | 2748 | 425  |
| AATGACATTTCAAATGATTC  | 22457 | TGG | 2737 | 167  |
| GTTCAAATAATGATACTGGT  | 20325 | TGG | 2726 | 487  |
| ATTAACGAATGAACTCAAT   | 18056 | AGG | 2709 | 412  |
| ACACAAATCCATCAATTGTT  | 2890  | TGG | 2691 | 53   |
| ACGACATAAGCATGTTTAAT  | 3441  | TGG | 2678 | 502  |
| GTTTTAGAGAATGTTTCTAC  | 6754  | AGG | 2658 | 481  |
| GTGACATAACAACATCCCTGA | 37734 | AGG | 2629 | 198  |
| ACTCGACGACCAAGATGTTG  | 1077  | AGG | 2627 | 662  |
| CTAAAAATTGATGTGCAGAC  | 31425 | GGG | 2622 | 582  |
| ACACCTCAATATATACTTGC  | 15249 | TGG | 2594 | 305  |
| GTTTGAAGATGAAGAAACGT  | 18313 | TGG | 2545 | 680  |
| CTATGCTTGCAGTTTGGAAC  | 10847 | GGG | 2543 | 302  |
| AGCCAATCACGCCATTCAGC  | 23323 | AGG | 2521 | 671  |
| TCCTAAAATCCCTTTAAGCA  | 34242 | TGG | 2517 | 474  |
| ACGTAATATCAACGGTATGT  | 15707 | GGG | 2516 | 807  |
| GACATCGCAGTTTGGCACCC  | 34634 | TGG | 2499 | 851  |
| CCTTTTGCACCAGGTTGTCC  | 36784 | CGG | 2490 | 637  |
| CAAGATGGAACAGCAGACGC  | 12373 | AGG | 2463 | 567  |
| TGATGAATTAGCTGACATGT  | 12069 | TGG | 2452 | 558  |
| TTAGTTGTTTCAGATGTAGT  | 21085 | AGG | 2423 | 649  |

|                        |       |     |      |     |
|------------------------|-------|-----|------|-----|
| GTAAAAATTA AAACTATTTTC | 12660 | AGG | 2365 | 96  |
| TCTTTATACTCGTAACCATT   | 7797  | CGG | 2352 | 352 |
| CCAAATCGTATCAAGTACAT   | 25934 | TGG | 2341 | 603 |
| TTATCTAATTGTTTATCGAT   | 1389  | TGG | 2335 | 592 |
| GGCTCAGCAGGGTTTCAAGC   | 4695  | TGG | 2325 | 300 |
| CAAGATACTATCGAAGCTGT   | 31981 | CGG | 2283 | 491 |
| CTGAATTCAATAAATACAAC   | 17851 | AGG | 2271 | 339 |
| ATTCACCCACAACAATATAT   | 21829 | GGG | 2263 | 582 |
| AATCAAAAAATACAACCAAC   | 7597  | TGG | 2261 | 522 |
| GCGTCACCTTCATCTATGTC   | 17635 | AGG | 2260 | 279 |
| CATTAACGAAGGTGGAACAA   | 3991  | CGG | 2258 | 445 |
| CAACCAGCACATTACACATA   | 9862  | CGG | 2256 | 411 |
| ATTCTCATTCAAATCAAAGT   | 15738 | CGG | 2249 | 182 |
| CTTAATGTGTTTCATAGATTC  | 37069 | AGG | 2230 | 506 |
| AAAAAAATTATGCTTGTAGC   | 38722 | CGG | 2224 | 322 |
| AACAACAACGAAATATATGC   | 11088 | GGG | 2211 | 68  |
| TGTA CTGTTTTTCATTTTG   | 7941  | TGG | 2203 | 265 |
| CAAACGTCATTGCATAATCA   | 35970 | GGG | 2195 | 317 |
| TGCTCATACTTTGCGTTATC   | 35380 | CGG | 2187 | 348 |
| AAGAGGTATTTAAATATGTT   | 16156 | TGG | 2148 | 378 |
| CCGATAATTTGAGCGACTGC   | 25276 | TGG | 2122 | 356 |
| AGTTTTATAACGGCTCAGCA   | 4684  | GGG | 2120 | 494 |
| GCGATCAGTTAAAACTACA    | 24537 | TGG | 2105 | 92  |
| CCACAATTAGCATTTGCAAT   | 9934  | AGG | 2063 | 320 |
| TTAAAACCCCTAACCTTACT   | 6272  | AGG | 2057 | 145 |
| GGTATGAATAGAATGACGTT   | 14900 | AGG | 2051 | 326 |
| CTTAGACCAGAAACACTTTT   | 7552  | TGG | 2046 | 175 |
| AATCTCCGTTTAGTTAATAC   | 5967  | AGG | 2037 | 526 |
| CCACACCCTTGCGTTTAATA   | 2334  | AGG | 2034 | 138 |
| CTTTGTTGGTTTGATGCATT   | 33521 | CGG | 2034 | 453 |
| ACTACAGCATGGTCAATTGC   | 3165  | GGG | 2011 | 558 |
| AAGTTACTACTCACACTA     | 259   | AGG | 1973 | 187 |
| AGCACTCCTAATCGTCATCT   | 5893  | TGG | 1969 | 702 |
| TTTAAAAATCGGAAGGTTTC   | 14717 | CGG | 1961 | 114 |
| GGCAAAGATGAAAAGTCAC    | 33878 | AGG | 1957 | 359 |
| TTATTTTCAGTGTA CTTTTTC | 13048 | GGG | 1946 | 99  |
| CGTACTTA ACTTTTGCCATA  | 21277 | TGG | 1937 | 110 |
| TACGAGTGA ACTTAAATATC  | 17454 | AGG | 1932 | 559 |
| CTATCTCGTAAGTTCAGCGT   | 11931 | TGG | 1924 | 251 |
| ATTTGCAAATCCTAGCATT    | 4552  | CGG | 1924 | 492 |
| AAGCTCATTTTAAGCGCGAT   | 21963 | AGG | 1915 | 310 |
| CATGCCTACACAGTATTCAA   | 2380  | TGG | 1912 | 513 |
| TTTTTCACACCTTGCCAATC   | 10181 | TGG | 1910 | 543 |
| GACAGAACTATTGAGTACG    | 3786  | AGG | 1901 | 181 |
| CTTATCTGAAGTATCTATGC   | 24655 | TGG | 1900 | 222 |

|                       |       |     |      |     |
|-----------------------|-------|-----|------|-----|
| TTTTTTACCTCAAATTTTAC  | 4075  | AGG | 1888 | 288 |
| AAATTACCTGACATAGATGA  | 17645 | AGG | 1887 | 405 |
| ACACTGCTAACAGCTGCAAT  | 25342 | CGG | 1886 | 315 |
| TCATACTCTAGTAATTCGTC  | 9367  | TGG | 1866 | 170 |
| AATAAGCGCCATTCACTACA  | 10138 | TGG | 1863 | 253 |
| GATTACTTACGTAATGCGAA  | 676   | AGG | 1837 | 298 |
| GATTCCAATACTACGTTAAT  | 1461  | AGG | 1836 | 366 |
| ACATCATCGCCCTTTTTGTA  | 5003  | AGG | 1830 | 209 |
| AGAGCACCATTATAGTGTC   | 31087 | AGG | 1825 | 49  |
| ATTGGAGCATGCAAATAACT  | 1407  | TGG | 1823 | 362 |
| GAGTCTAAATTTAAATCGAG  | 19408 | TGG | 1819 | 286 |
| GTAGAGATATAGAACTTCAC  | 5383  | TGG | 1818 | 239 |
| ACAACCTTCACGACGCAATAA | 15028 | CGG | 1808 | 193 |
| AAATCTTCTTTTTCTTCAAT  | 16429 | TGG | 1807 | 109 |
| CTGAGAATTTTATTACATGA  | 12851 | CGG | 1807 | 375 |
| AAAAGAATTTGATGACGTGT  | 16202 | TGG | 1801 | 269 |
| GACAAAGAAATGACGAAAGC  | 23187 | AGG | 1789 | 219 |
| AATGCCCTACATCTTGTGC   | 14480 | AGG | 1785 | 379 |
| AATACCACTTGCATGACTCG  | 5794  | TGG | 1778 | 442 |
| GATGGACGACAACTTTTTGT  | 27154 | AGG | 1776 | 323 |
| CCGCCCATGATTGCTTTTGC  | 36016 | TGG | 1764 | 267 |
| AATAGAGCTAGGGAGTTTAA  | 3709  | CGG | 1745 | 394 |
| AGATTTTATTGAACAAGTAA  | 9900  | CGG | 1729 | 44  |
| AATTTTCTAGTTGATTCTAC  | 5396  | TGG | 1728 | 242 |
| TTAATATTGCAAGGTTCATA  | 8038  | CGG | 1717 | 273 |
| AAAACATAATAGCATCATCTA | 6502  | TGG | 1714 | 248 |
| GGATTCCTTATTAACGCAA   | 2345  | GGG | 1712 | 340 |
| CATATTCTTCAAAGGCCTTT  | 14775 | TGG | 1709 | 83  |
| GACCAAGATTTAGCGTTTTA  | 5166  | AGG | 1705 | 317 |
| TTCTTAAGTTGTCTTTCAGT  | 30454 | GGG | 1695 | 213 |
| CGTCCACGCTTTCGTAATAC  | 8907  | AGG | 1676 | 369 |
| CTCAACTTTGCGAAGTCACT  | 13745 | CGG | 1663 | 36  |
| GGTATGTGGGTGTCTGGTGA  | 15720 | CGG | 1661 | 106 |
| AATGATTCTGACATTGCATT  | 22286 | GGG | 1660 | 57  |
| TCCGTTTTATCAGTGCCTAT  | 29215 | CGG | 1654 | 184 |
| TGAATTTTACAGTCCTATGA  | 13169 | TGG | 1650 | 218 |
| AATCCCTCAATAACGCCACC  | 33096 | TGG | 1650 | 247 |
| AACTAAATCAAATATGAAC   | 8351  | TGG | 1639 | 197 |
| TGAACCTAATAAAAGTTATC  | 37605 | AGG | 1631 | 295 |
| GGCAACGCAGATTGTTTGAG  | 2310  | TGG | 1629 | 269 |
| GACGGTATGAGTGATGCACT  | 26282 | TGG | 1601 | 142 |
| ACTTATTATTATGTATTTG   | 16889 | AGG | 1600 | 49  |
| CCATTCATGTTTCGTGCCGTT | 33943 | TGG | 1599 | 186 |
| TCAGATACACAACCTATGCA  | 30587 | AGG | 1596 | 71  |
| GCTAAAGTCATATATACTAC  | 39929 | GGG | 1596 | 372 |

|                       |       |     |      |     |
|-----------------------|-------|-----|------|-----|
| CTAATCGTTACATTCACAAT  | 26638 | AGG | 1588 | 505 |
| TCTTTCAACAACCAATGCTC  | 15539 | GGG | 1578 | 363 |
| ACAACATTCAAAGATTCAAC  | 12466 | AGG | 1577 | 460 |
| TGTTACCCAAGCATGTCAC   | 39880 | TGG | 1573 | 137 |
| AAATAAAAAGATGCAACAAT  | 399   | GGG | 1571 | 156 |
| GCATTGATACCAGTGATTGC  | 24320 | CGG | 1569 | 16  |
| CCTTAATATTCGACGATAGC  | 8573  | GGG | 1564 | 131 |
| TGAATCAATCACACTTATTG  | 12809 | AGG | 1560 | 183 |
| TTGCGTCCCTGCGTCAATTGC | 21647 | AGG | 1555 | 31  |
| AACGCCCTGCTACTAATCAC  | 2629  | AGG | 1550 | 260 |
| GTTAGAAAAACGCGACGACG  | 19224 | AGG | 1548 | 88  |
| AAATAACTTTATCCACATAA  | 6704  | AGG | 1548 | 207 |
| ATATCACTGTTCCCTATGGCT | 25812 | TGG | 1547 | 294 |
| ATAAATTCGGAACAACGAGC  | 32705 | TGG | 1533 | 41  |
| AATCCTTTTTTCGACATGAGT | 7713  | AGG | 1531 | 108 |
| TTTACGCGCGTTATCTGTCA  | 10047 | TGG | 1528 | 188 |
| TGAAATCCATACCAACCATC  | 38235 | TGG | 1520 | 267 |
| AAGATTTAAATGTAGATAAC  | 39754 | AGG | 1513 | 520 |
| GTTTGATGTTCCGAGTAAAG  | 18026 | AGG | 1502 | 70  |
| GAAAGAATGACGAGTTTTAA  | 12729 | TGG | 1502 | 233 |
| TATGCACATACCAATGTTGA  | 8130  | TGG | 1500 | 329 |
| ATATTTGGCAATGTGTTCCGC | 24980 | TGG | 1497 | 180 |
| TGGAAGTGGTGCAAGAATAT  | 15512 | TGG | 1491 | 123 |
| AAGAAATCGTTAGCACTAAT  | 20219 | GGG | 1489 | 294 |
| GCGTTTGATGAAATACTTGA  | 11745 | GGG | 1479 | 196 |
| TCTTGGAATCATATTTATA   | 4817  | CGG | 1474 | 3   |
| GTCGAAGATTATTTTATCTC  | 27535 | CGG | 1473 | 384 |
| TTTATAGGCTCTCCGTTTGT  | 16166 | AGG | 1463 | 286 |
| ACTCCTAATCGTCATCTTGG  | 5896  | CGG | 1449 | 80  |
| ATGAGAGCACGTAAAGACGA  | 18537 | TGG | 1443 | 214 |
| GATACAAAGACTTACTTTAT  | 10714 | AGG | 1435 | 113 |
| ATTGCAAATGCTAATTGTGG  | 9915  | TGG | 1435 | 256 |
| AATTTAAGTTTATTGATGAT  | 15922 | TGG | 1432 | 268 |
| TTCAGTGATTTCTTAAATGC  | 26321 | CGG | 1431 | 220 |
| GCTTTTTATTATGCACTTTT  | 18877 | CGG | 1427 | 55  |
| ATACGTCCATCAACAAGCGG  | 28429 | TGG | 1424 | 83  |
| TTAAGTACTGCCATTATTGC  | 24334 | AGG | 1424 | 112 |
| TAAGTACTGCAATGACGC    | 21657 | AGG | 1419 | 389 |
| TAACTACTACGACTTAAGC   | 21268 | AGG | 1412 | 325 |
| TCCTCATGACCATTCTTTAA  | 9969  | CGG | 1410 | 172 |
| GTCAAGATGTATTACGAAAT  | 3328  | AGG | 1408 | 37  |
| ACTAATGGCGTTGCGCAACC  | 38545 | TGG | 1399 | 341 |
| TTGAAAATGATTTAGTTAGT  | 31919 | GGG | 1395 | 315 |
| TATGAAAAGATGATGATAA   | 16832 | TGG | 1392 | 312 |

|                       |       |     |      |     |
|-----------------------|-------|-----|------|-----|
| TATTTAATTATGAAAATCAC  | 4626  | AGG | 1391 | 292 |
| AAGTCACGTTGTAGTGGAAC  | 15498 | TGG | 1389 | 267 |
| GTGTGATATGCGTCAAACAC  | 29449 | TGG | 1387 | 308 |
| ATTAAGGCTTCAACACCATC  | 15672 | AGG | 1383 | 423 |
| ATCTTTCAACAACCAATGCT  | 15540 | CGG | 1379 | 130 |
| ACTTATACATCAAGCAAATC  | 32482 | TGG | 1375 | 36  |
| AACAACCCTCCTCATCACAA  | 2575  | TGG | 1373 | 79  |
| ACTGCAACTACTGCTAATAT  | 25492 | TGG | 1372 | 24  |
| TTCCCCCTCCTTAATCGTTC  | 16244 | AGG | 1360 | 201 |
| ACTAAAATGTGGCAAATTGA  | 36893 | TGG | 1357 | 113 |
| CAGTATCCCTGATATAGAC   | 22054 | AGG | 1352 | 288 |
| TTTAAACGACGTATCGATAT  | 30713 | TGG | 1349 | 404 |
| GACAAGTTTCAGAACGAACA  | 17544 | AGG | 1342 | 334 |
| AGGGAATGGAATACACAGTC  | 7337  | GGG | 1340 | 77  |
| TGTAGGCGATTCTGTAGATC  | 21229 | AGG | 1336 | 435 |
| AATTTAACTACCCACCATAT  | 14403 | AGG | 1335 | 319 |
| CAGCCATATTTTGCTTTAAT  | 32000 | TGG | 1334 | 122 |
| GAAACAATAAGTAAACTTTC  | 6075  | TGG | 1330 | 299 |
| TTTATATTCACAACCTTGCCA | 353   | AGG | 1327 | 133 |
| CCATCCTACCCGGTAATAAAA | 837   | TGG | 1322 | 300 |
| ACCGCTCTATATTTAACGGC  | 6388  | AGG | 1311 | 96  |
| GGTAAACATCACGGAATGTT  | 22440 | TGG | 1310 | 298 |
| ATATCTATTGATGTTGTAAA  | 11190 | TGG | 1300 | 394 |
| CTTTGAATGGTTTAATACAT  | 11994 | TGG | 1300 | 527 |
| CGAGTGTGGGACGAATATAC  | 10926 | AGG | 1295 | 321 |
| CTAATACATGTTTGTCATAG  | 5695  | TGG | 1294 | 215 |
| CTCAAAGTGATGTGTTAGCT  | 4404  | AGG | 1288 | 202 |
| GATTTGATTACCTCTTACT   | 18020 | CGG | 1286 | 76  |
| ATATTCATACCGTCATTCTT  | 6358  | TGG | 1286 | 218 |
| CTGTCTATAGAAGTACTTAC  | 26569 | AGG | 1281 | 10  |
| GAAAAACAATAACAGAAGCT  | 25587 | TGG | 1281 | 504 |
| GATGAACGCTCAGATATTCA  | 35012 | AGG | 1280 | 239 |
| TCCTTTCACTTATAATCACT  | 26829 | TGG | 1275 | 241 |
| CTAAATCAATGGCTCAACGA  | 23769 | TGG | 1271 | 12  |
| TGCCAAGGAAATCCTATGCA  | 338   | AGG | 1270 | 7   |
| ACACCAGAAAACACATATAG  | 2830  | AGG | 1270 | 287 |
| AATACTTGTGTTGTGTTACC  | 31387 | CGG | 1266 | 168 |
| TTTGTGTCGTTTCATATTCGT | 38125 | AGG | 1260 | 379 |
| CCGATTAAGTGCATAATAGT  | 25138 | AGG | 1258 | 190 |
| GTATAACGGCAATGACACAG  | 11681 | AGG | 1245 | 65  |
| AATTTCTGTCCGAAAACGC   | 31220 | CGG | 1242 | 33  |
| AGATGAGAATGACTTAGATA  | 3480  | TGG | 1241 | 270 |
| TTTACCTTAATATCTTCTGC  | 20457 | AGG | 1233 | 368 |
| ATTCAACATTGAGTTAAAGA  | 11781 | AGG | 1232 | 7   |
| GATAACATGTAATGATTACC  | 30148 | TGG | 1232 | 272 |

|                       |       |     |      |     |
|-----------------------|-------|-----|------|-----|
| GGCGTTCAAGTGGTTCAGAC  | 15372 | AGG | 1231 | 118 |
| CGGACAAGGCAAAGCATTCCG | 35827 | CGG | 1225 | 263 |
| ATCAAGTGGGTGTGTTGGGC  | 18416 | AGG | 1222 | 163 |
| AATTATTCAATGGTCAATGT  | 37782 | CGG | 1221 | 169 |
| ACAAGAGTGCCGGATTTACC  | 32830 | AGG | 1221 | 306 |
| ACTAAGTAACACTGAATTAA  | 23899 | TGG | 1211 | 226 |
| CGCAAAAATATTCATGTAA   | 3361  | CGG | 1211 | 250 |
| CAAAAAGAGTACGTGGTGGC  | 9540  | TGG | 1208 | 36  |
| TCAGCTAAGCGCATGCCATA  | 9571  | AGG | 1197 | 327 |
| AATTGGCCACTGCTTTCAA   | 5117  | TGG | 1192 | 308 |
| GATTTGGGATATTTAACTGC  | 32794 | TGG | 1192 | 340 |
| TTGACACAACACAAACATCA  | 27197 | GGG | 1187 | 157 |
| TTCCCTAACAACTTAAGCGT  | 38638 | TGG | 1187 | 172 |
| CGTAGACCTTTTCGGCATTAA | 20026 | TGG | 1184 | 133 |
| TATAATTCATTCATGTTATT  | 15351 | TGG | 1184 | 203 |
| TGCCAACGCTTAAGTTGTTA  | 38624 | GGG | 1183 | 325 |
| TTTTACAAAAGCTTTACCAT  | 5991  | AGG | 1183 | 434 |
| TACGATTAAGCAGATGAAC   | 15776 | TGG | 1182 | 45  |
| TAGCGTCCATTACACCTAGT  | 11361 | TGG | 1180 | 150 |
| GTAAAAGCGTTAGTGGCATT  | 25184 | TGG | 1179 | 239 |
| TTCGTCATTGACATTAACGA  | 3980  | AGG | 1172 | 300 |
| AGTGGTAAACCGCTTGTTGA  | 19958 | AGG | 1171 | 231 |
| TACTACACCTTGAATCGCAC  | 25616 | CGG | 1170 | 122 |
| GACGTCCAAGCACTATTTGC  | 27019 | TGG | 1166 | 239 |
| ACAGTTCTAACATTTTTGAC  | 25035 | TGG | 1166 | 377 |
| GTTTTCCCGTCAAAGTATGG  | 38437 | TGG | 1165 | 198 |
| AGAAAAACAACAACCTTAAT  | 2524  | AGG | 1163 | 335 |
| CGGTACTATCTTCGCGCAAC  | 24268 | AGG | 1152 | 92  |
| GGTATGACTTTGGCCGAAC   | 479   | AGG | 1142 | 197 |
| AACGGAAATGTACCTATCAT  | 17303 | TGG | 1139 | 218 |
| GAGATTTCCAAAGCAACGTA  | 23652 | AGG | 1133 | 165 |
| CCTATCAAAGAATACTTTGC  | 15807 | TGG | 1131 | 122 |
| GAACCTGTATCAGTACTACT  | 34831 | AGG | 1128 | 254 |
| CAACAGACTTTTGCAGAAGC  | 28367 | GGG | 1128 | 288 |
| CCTTTAACCGCCATTTTAGC  | 23980 | GGG | 1127 | 186 |
| ATAACTAGCTCAAAGCGTTA  | 9195  | TGG | 1126 | 207 |
| AAAAGAAGTAACCAAAGACA  | 10519 | CGG | 1126 | 307 |
| CTACACCTAAATTATCTTTG  | 2936  | CGG | 1124 | 205 |
| TTTTTTGATGTCTATTACCC  | 6033  | AGG | 1119 | 185 |
| GTTTTAAACCCAAAGAATGA  | 6351  | CGG | 1116 | 232 |
| GGCAATGTGTTTCGCTGGTAT | 24986 | TGG | 1115 | 378 |
| AGCAATCCATTTGAAAGCAG  | 5127  | TGG | 1113 | 359 |
| TACTACAGTACCGTTTTTAC  | 36839 | CGG | 1110 | 325 |
| AGAGGGAGAGTCGCTCGTAC  | 23125 | TGG | 1109 | 138 |
| TACACACGATCAATCACAAA  | 32947 | CGG | 1105 | 25  |



|                        |       |     |      |     |
|------------------------|-------|-----|------|-----|
| GTTTACCATCATACAAGGAT   | 40369 | GGG | 1105 | 142 |
| GTGCCTATATCCGTCTTTTC   | 32388 | TGG | 1103 | 175 |
| CGCTATTAATGTTAGTACAA   | 27769 | AGG | 1102 | 80  |
| TATTCATACCGTCATTCTTT   | 6359  | GGG | 1102 | 323 |
| ATTCATGACTTATCGTGAGT   | 18578 | GGG | 1101 | 53  |
| TTATGTTATAGCTAGCCTTC   | 39804 | GGG | 1094 | 170 |
| ATTGAATTGCTATCATATTC   | 13883 | CGG | 1094 | 249 |
| TGCTTATCTGTCTTCGGAAT   | 5036  | AGG | 1094 | 275 |
| CACCTTAAAACGCTAAATCT   | 5152  | TGG | 1089 | 186 |
| GGTCTTGTAATTATTTTC     | 6619  | AGG | 1085 | 197 |
| AACGATTCAAAGGCGCTCAC   | 8770  | GGG | 1083 | 177 |
| AAGCAAGAAAAGTTTGTGCT   | 14594 | AGG | 1083 | 311 |
| ATCCTTGATGATGGTAAAC    | 40350 | CGG | 1071 | 383 |
| AATACTCCACTAATGTAATC   | 20876 | AGG | 1069 | 108 |
| AATACTTTGCTGGTGTGAC    | 15817 | TGG | 1066 | 123 |
| CGGAAAGCATATATTGACGC   | 14639 | AGG | 1062 | 254 |
| ATCATCAACACTATTTCTAA   | 16631 | TGG | 1060 | 128 |
| AAAACAGTTACAACGCTAA    | 28907 | TGG | 1060 | 316 |
| CAAATAGATAAAGGTGACAG   | 14987 | TGG | 1053 | 158 |
| TAAAGCTCAATCATTGCGTG   | 18221 | TGG | 1052 | 126 |
| CCTGCTTCACCTTTTGCACC   | 36793 | AGG | 1050 | 242 |
| TGGTTCGATATCTTTATTGC   | 13294 | TGG | 1049 | 56  |
| GTAATTAATCCGTAAGCCAT   | 29611 | TGG | 1049 | 213 |
| AATTTAAGTGCTAAAGCTAA   | 6970  | AGG | 1049 | 330 |
| TAAACTTTCGTTATACTCT    | 28014 | TGG | 1047 | 142 |
| GAAGCGCCACCGCTTGTTGA   | 28439 | TGG | 1047 | 357 |
| TTGAGTATTGCGAATCAAGT   | 12100 | AGG | 1036 | 258 |
| TTGGTAAGTGGAACCTTATCC  | 33094 | AGG | 1032 | 216 |
| ATAGAGGTGGTTAAATATGT   | 21707 | GGG | 1029 | 265 |
| AGTTCACTATGAAAACACTACG | 10991 | CGG | 1028 | 137 |
| TCAAAGTTTACAGTCGTTG    | 12525 | AGG | 1023 | 300 |
| GTCGAACACTTATTTGTATT   | 10435 | TGG | 1022 | 183 |
| AGATACCAGAAAGATAACGA   | 5214  | CGG | 1016 | 155 |
| ATATGTATCGAGTGATGACA   | 40072 | AGG | 1016 | 249 |
| TAAATACAACAGGCTCAATA   | 17861 | AGG | 1013 | 183 |
| AATTTAAAGTCAAGAAGTAT   | 20838 | GGG | 1012 | 276 |
| AAAAAGAAAAGTGAAATGGT   | 9072  | TGG | 1011 | 283 |
| CATATCTCCTCCTATTCAGT   | 20425 | TGG | 1007 | 133 |
| AATTAGAAATGTAAATGTAG   | 9415  | AGG | 1003 | 163 |
| CCATTTATTACCGGGTAGGA   | 821   | TGG | 1001 | 324 |
| CTATAAATATGAGGAGGCAC   | 11849 | AGG | 999  | 258 |
| TTTGAAATGTACGAGATGGA   | 10556 | AGG | 998  | 403 |
| AAGATATAGAATGCTTTGGT   | 10630 | AGG | 987  | 210 |
| CGGATTCCTTATTAACGCA    | 2344  | AGG | 987  | 285 |
| ACATTTAGTAAATCATTACG   | 39108 | AGG | 983  | 112 |

|                      |       |     |     |     |
|----------------------|-------|-----|-----|-----|
| ATTTGCTATCCTTGAATTGA | 461   | TGG | 979 | 239 |
| GGAAAAAAGGAGCAAACAAA | 37855 | TGG | 977 | 52  |
| GGTTAAACCTCTAATTGCAG | 19870 | AGG | 976 | 162 |
| ACAGTATTAGACGCATGTAA | 9138  | TGG | 975 | 105 |
| AAAAACCAACGTTTAATGAT | 4197  | TGG | 962 | 236 |
| AACAGCTGAATGGTTAAACA | 7515  | CGG | 959 | 245 |
| CTAATTGTTCTCGAGTTGGT | 22993 | GGG | 958 | 229 |
| GCTGAAAACGGTGTGTTTAA | 7141  | AGG | 950 | 14  |
| AAAAAGAGTACGTGGTGGCT | 9541  | GGG | 946 | 160 |
| GAAATCCATACCAACCATCT | 38234 | GGG | 942 | 156 |
| GCACGTTGCATAATCATTTC | 2116  | TGG | 929 | 129 |
| CAAGTATCGATGACTGATTC | 30923 | AGG | 926 | 180 |
| ACAATAGAAAATGTACGTAG | 37630 | CGG | 926 | 266 |
| TTGTTCAAATTTGTGTCTCA | 24845 | AGG | 920 | 102 |
| GTTAAAAGAATGTTAAAGTC | 6108  | AGG | 920 | 316 |
| TCTTTCAATATCGTTGATAG | 36590 | TGG | 915 | 103 |
| GTAGTTAAACATATGAATGA | 7048  | TGG | 914 | 62  |
| AACCAATGCTCGGGATGGTC | 15530 | AGG | 914 | 194 |
| AAAGGAGAACAAGGCGCACC | 36836 | CGG | 913 | 131 |
| ATTTAAAGTCAAGAAGTATG | 20839 | GGG | 913 | 339 |
| ACTAAGACATCAATTTTAGT | 2246  | TGG | 912 | 66  |
| GCCAACAAAATAACATTAT  | 16754 | AGG | 908 | 163 |
| GTTGACTCAGACGGCAACGG | 33184 | TGG | 895 | 205 |
| CGGATTGTTCTATTTGTTCA | 11626 | CGG | 895 | 206 |
| AAACAATAAACTTTTATGG  | 11602 | AGG | 894 | 1   |
| AGCATTGTTGATAACAGAGT | 8290  | AGG | 894 | 180 |
| GCAACGTGATGAGCTTATTG | 11440 | GGG | 894 | 203 |
| CCTGTCCAAATTTTAACCGT | 37312 | CGG | 893 | 125 |
| AACTTTGAAGCTTCTAGAGC | 6577  | AGG | 891 | 88  |
| GAACAACCGGTTTTATATCC | 27628 | AGG | 890 | 220 |
| GTTGTTTGAAATGTACGAGA | 10552 | TGG | 883 | 132 |
| CGATCAGTCTGATTTGATGA | 13784 | GGG | 883 | 151 |
| GTTAGAACTTTGGTACTGG  | 31463 | TGG | 879 | 142 |
| GAATATACAAAAGTATATGC | 37471 | TGG | 877 | 70  |
| ATATGACGATGACGTTAATC | 10677 | TGG | 867 | 198 |
| ACATCTGTTTCAATTTGTT  | 23689 | TGG | 864 | 165 |
| TATTGGTAAGTTTTGTTACT | 4934  | TGG | 862 | 192 |
| TAAATCTGACGCACTTTGT  | 33535 | TGG | 862 | 230 |
| AGCTAGGCAACGACGTAAAG | 9667  | AGG | 859 | 241 |
| TAGGGAATGGAATACACAGT | 7338  | CGG | 855 | 42  |
| GTAGTTGAATATAACGTTAC | 26854 | AGG | 854 | 127 |
| CTAAAGTCATATATACTACG | 39928 | GGG | 851 | 110 |
| CCATTCGGGTGTTTTTTAGT | 7782  | AGG | 851 | 133 |
| GTGCTTTCACAAGTATTTCT | 25485 | TGG | 850 | 28  |
| TTACTTGTACTAGATGATA  | 8229  | TGG | 844 | 209 |

|                      |       |     |     |     |
|----------------------|-------|-----|-----|-----|
| CAAAAGCAGTCAAAGCTAAA | 8093  | GGG | 842 | 180 |
| GTATTGTTGTACCACTCATA | 29337 | GGG | 841 | 5   |
| ATAACAAAAAAGTAGCCCGA | 39803 | AGG | 838 | 140 |
| TCATCAAGTTGTACGTCTAA | 12036 | CGG | 838 | 141 |
| TTCATACTACGCCAAATATT | 35320 | AGG | 838 | 313 |
| TTTTATATGAGCAAGAGCTA | 8794  | GGG | 834 | 157 |
| TTCCCTCACACTATTTCTAT | 20996 | TGG | 829 | 146 |
| TTCTTTGCGCATTCTTCAA  | 19468 | TGG | 826 | 150 |
| AGTTTAATTGATACTGGAGA | 13239 | TGG | 825 | 12  |
| GTATCTGTTTTAATATACGT | 12767 | TGG | 825 | 58  |
| ACTCTTTTTGCAACCATTCC | 9511  | AGG | 824 | 196 |
| TTATTTGCTAATAGTTTGTT | 2738  | CGG | 822 | 63  |
| TTAGTTATAGTAACTTTGT  | 33295 | TGG | 818 | 153 |
| AGAAATGTTAAAAAGTGTAT | 39712 | AGG | 814 | 48  |
| ATGCTCGGGATGGTCAGGGT | 15525 | TGG | 814 | 130 |
| TTAATACGTCCATCAACAAG | 28432 | CGG | 814 | 192 |
| GGTGTGACTTAGGTGACAT  | 36287 | TGG | 812 | 132 |
| CTGGATAGACAAATGTCTAG | 35618 | GGG | 812 | 189 |
| TACACACATAAGTTTATTGG | 234   | CGG | 811 | 47  |
| CGATAGAATCGGAAACCTT  | 34564 | AGG | 811 | 78  |
| GCAAAGAACGTGAAATAGCT | 9651  | AGG | 809 | 77  |
| TCTTTTCGATTCGATCTAAA | 17217 | TGG | 809 | 200 |
| TAGTGGCGTTCAAGAACTTA | 7086  | TGG | 804 | 102 |
| CTGTTCTATGAAAGTTGCAA | 5489  | GGG | 802 | 18  |
| ATACTTGATAAGTCTACTAT | 27938 | TGG | 801 | 195 |
| TATGTTTGGCACCCACAAA  | 16170 | CGG | 800 | 62  |
| TGGAATGAACTTAAACTTA  | 17323 | TGG | 799 | 111 |
| TTATTTCTCCAGTTCTATAT | 30321 | TGG | 798 | 15  |
| TTTGACACAACACAAACATC | 27196 | AGG | 796 | 56  |
| AAGTTAAGAAGTAACGCGCT | 19258 | AGG | 794 | 267 |
| TCGTTATATAGCGACAGGAG | 39567 | AGG | 792 | 38  |
| TTCGACCATGATTTAAGTAA | 9032  | TGG | 791 | 138 |
| ATTTGAATCATCACATTTAT | 11324 | TGG | 791 | 154 |
| TCATTCTGATTGGTTATTTT | 17669 | GGG | 788 | 162 |
| AATACCATTTATTACCGGGT | 825   | AGG | 788 | 235 |
| ATTTAATGATTCTGCAGCTG | 308   | AGG | 787 | 35  |
| CAATATAAAACGAAAAACGG | 3303  | AGG | 786 | 60  |
| TATTGTCATCGAGCTTAAAT | 15604 | TGG | 780 | 219 |
| TTTATCTCTTGTAGCAAACG | 3935  | TGG | 780 | 238 |
| AACCAAGCTATGTTGATAGA | 376   | GGG | 778 | 189 |
| ATTTTTAAAACATTCAGGCA | 31824 | AGG | 777 | 85  |
| TTTGTAGCACGACTACCACC | 21548 | AGG | 777 | 151 |
| TATCGCTATTGCGTTAGATT | 6829  | GGG | 775 | 96  |
| TGTGAGGGAATTCGTCGTAT | 20967 | GGG | 774 | 187 |
| CATATAAATAAAGGCTCATA | 17962 | AGG | 773 | 270 |

|                       |       |     |     |     |
|-----------------------|-------|-----|-----|-----|
| ATACGTAATTGTTGTGTTGT  | 39466 | TGG | 772 | 23  |
| AATAAATTGTTTTAGCTAT   | 21163 | TGG | 771 | 150 |
| AAAATATCTCTTCCTTCTTG  | 869   | AGG | 767 | 113 |
| GAAATCCTATGCAAGGCAGT  | 331   | AGG | 766 | 265 |
| ACTGCATACGGTGTTAATGT  | 38905 | AGG | 765 | 145 |
| CTTATCTGAAACGACGTTAA  | 35308 | AGG | 763 | 223 |
| GTAGAATTTTCAGCATCTTT  | 2686  | CGG | 762 | 61  |
| TTTGTTTCGGCGAACTTCAAA | 2724  | AGG | 762 | 101 |
| ATTGATCATATAGTTGTAAT  | 34988 | GGG | 761 | 1   |
| ATTCGAAAGGATTAGAATCA  | 19103 | TGG | 758 | 229 |
| TAGTAGCCATTAATGCCGAA  | 20016 | AGG | 757 | 40  |
| TATTAGAATTAACCCAGTTT  | 34716 | TGG | 753 | 110 |
| GGGTGTCTTACTAACTTCC   | 34753 | CGG | 751 | 185 |
| GGTCATGGTTATAACGATCC  | 38743 | TGG | 750 | 227 |
| GAAAACCTGTGATTAGTAGC  | 2640  | AGG | 746 | 221 |
| CTATCCGGATATTTATTTTT  | 37527 | AGG | 745 | 6   |
| AAAGAGTGGTTTGAAGCTGC  | 22575 | AGG | 744 | 63  |
| AGACGTGAACTCTTCAAAGA  | 23552 | AGG | 744 | 250 |
| TTTATCCTACTGCCTTGCAT  | 342   | AGG | 743 | 15  |
| TGGGAAATTCACCTTTATG   | 6700  | TGG | 740 | 216 |
| CACTCACGATAAGTCATGAA  | 18560 | TGG | 738 | 154 |
| TTTGACCAAGCTGTTATCTT  | 19907 | TGG | 734 | 174 |
| TCTTCTGCGCCTTCAACAAG  | 19951 | CGG | 728 | 24  |
| TCACAATGGCAGTTGTGACG  | 2589  | TGG | 728 | 138 |
| GAAATACATTTAGACGCAGC  | 38986 | AGG | 726 | 152 |
| TATAGTTGGGATCAATGTTG  | 13006 | AGG | 726 | 179 |
| GTTGGTTCAGTCGTGTTGCT  | 26118 | TGG | 725 | 90  |
| CATTCATGACTTATCGTGAG  | 18577 | TGG | 724 | 139 |
| TGATATTTAGAGGTGGCACA  | 8834  | TGG | 718 | 93  |
| TAATTAACCTTAGTCATGAAA | 3569  | TGG | 716 | 44  |
| TATGTGTTTTCTGGTGTTGG  | 2808  | TGG | 713 | 80  |
| GCCTAAAAATCTATCAACTA  | 19294 | AGG | 713 | 93  |
| TCATCTAAATCATAAGTAAC  | 16561 | AGG | 713 | 297 |
| TAAGAATTATCTTAAGACGT  | 14304 | GGG | 712 | 79  |
| TTGATTTTGTCCAATAACTC  | 36925 | AGG | 709 | 118 |
| ACAACATCGTCGATAATAAG  | 36439 | GGG | 705 | 115 |
| TATAACGATCCTGGAGCAGT  | 38752 | AGG | 705 | 128 |
| TATTTCAACAAATGAATGGT  | 6474  | GGG | 703 | 104 |
| TAGATAACAGGCAGGTACTT  | 39766 | CGG | 702 | 141 |
| TCTTTGCTTTATTATCAAAC  | 38333 | GGG | 700 | 147 |
| ACGTAACGCTACAAAGTCTA  | 28520 | AGG | 698 | 159 |
| GTTTCAGAACGAACAAGGTT  | 17549 | AGG | 697 | 123 |
| ACTATAAGTGATGTTTATTC  | 37771 | AGG | 697 | 145 |
| AGATAGAGTGTTTGACTTGT  | 10032 | GGG | 693 | 127 |
| TTTGTTTCAAACGTATTAGA  | 4474  | AGG | 690 | 153 |

|                       |       |     |     |     |
|-----------------------|-------|-----|-----|-----|
| CAGGTACCGACCATTTTTCA  | 27287 | GGG | 690 | 201 |
| TTCATCCGTTTAAATCAATA  | 20938 | AGG | 687 | 24  |
| AACTATCGCTTGTTAGATGA  | 29699 | AGG | 687 | 194 |
| ATTTAAGGTGGTTATTCTTA  | 1698  | TGG | 685 | 68  |
| TATGGATAGGTTTAAGCAAG  | 16139 | AGG | 685 | 171 |
| AAATCAACGGTATTGTTCTGA | 33007 | CGG | 683 | 171 |
| ACAAGTACGGTTGTTAATAA  | 1979  | CGG | 682 | 74  |
| TTAATAGGACGAGGTATAGA  | 15867 | TGG | 680 | 129 |
| GAAGCCTTAAACGCACCTTA  | 9572  | TGG | 679 | 91  |
| TCAATACCTTTACCTAAAAT  | 6805  | AGG | 677 | 145 |
| TAGAAATAGTGTTGATGATG  | 16651 | AGG | 675 | 61  |
| TCGTTTGTAGGCAATCTATC  | 27306 | AGG | 675 | 65  |
| ACTCACGATAAGTCATGAAT  | 18559 | GGG | 672 | 80  |
| GCAACGTTGCCGAAACCACA  | 13941 | AGG | 671 | 78  |
| AGATGAAAAAACGACTATAA  | 165   | AGG | 671 | 170 |
| GCCATAAAATGAGTATCCAA  | 23593 | AGG | 670 | 47  |
| ATGTTGTTATCAAATATTTA  | 1713  | AGG | 667 | 175 |
| CCTTACAACACTTCAACTAG  | 19940 | TGG | 661 | 175 |
| AATAACAATACTAATAATGA  | 7312  | TGG | 660 | 61  |
| TACTTACGTAATGCGAAAGG  | 679   | TGG | 658 | 58  |
| ATTTAAGTGCTAAAGCTAAA  | 6971  | GGG | 657 | 252 |
| TTTTTCTTTTGTGCTGTCAT  | 19663 | TGG | 656 | 58  |
| TCAACAACCAATGCTCGGGA  | 15535 | TGG | 656 | 150 |
| AGGTTTAGTATGTGTGTATA  | 16224 | TGG | 655 | 160 |
| TTAGCATACCTTGTTACG    | 17090 | CGG | 655 | 191 |
| CAAATACAAGCGTTAATACG  | 35255 | TGG | 654 | 107 |
| TACACATGTAACAGAGAAAA  | 138   | TGG | 654 | 127 |
| TTGTTGAATTACCTTTAACA  | 32234 | AGG | 654 | 185 |
| TAATATCACTTAGATATGCT  | 30960 | GGG | 653 | 212 |
| ACGGAATACTAGAAGATGTT  | 20704 | AGG | 651 | 129 |
| ATGCACTTTTCGGACTGTTA  | 18887 | GGG | 649 | 212 |
| GGTATATATGCTACTGGTCC  | 21546 | TGG | 645 | 32  |
| AGCTAGGGAGTTTAACGGTA  | 3714  | TGG | 644 | 102 |
| TTGCAAATGTGAAATCTATG  | 7839  | AGG | 643 | 156 |
| TAATTTATACGTAGACCTTT  | 20017 | CGG | 642 | 44  |
| AGCACAAACTTTTCTTGCTT  | 14575 | CGG | 642 | 134 |
| CGATAGTAGACGCAATTAAT  | 31775 | GGG | 639 | 47  |
| ACAAGTGCTAATTAACCTGA  | 17521 | AGG | 639 | 114 |
| TCTCCCAATCATTAAACGT   | 4186  | TGG | 637 | 48  |
| AAGAGGTTGAACTACGTAAG  | 9684  | AGG | 636 | 49  |
| ATGGCGCTTATTACTTTTAC  | 10165 | GGG | 636 | 74  |
| CGCTAACATAAAGAACATAT  | 38272 | TGG | 634 | 250 |
| CAACGATATTTGATATTTAG  | 8824  | AGG | 633 | 182 |
| TGAATATGCACAAGCAGAAA  | 19771 | TGG | 631 | 145 |
| CTCCGCCACCATACTTTGAC  | 38426 | GGG | 631 | 183 |

|                       |       |     |     |     |
|-----------------------|-------|-----|-----|-----|
| TTTATTAACCTTACAAAAA   | 5010  | GGG | 630 | 210 |
| GAGATTAAGTCACGTTGTAG  | 15492 | TGG | 629 | 78  |
| TACTCATCGTCATTTAGATG  | 18365 | GGG | 628 | 55  |
| TAAAAGGTATCTACTTCACA  | 36195 | AGG | 628 | 94  |
| TTTGGAGCACTGTTACAAGT  | 26100 | TGG | 626 | 88  |
| CGTTTTAAATCAATAAGGTAG | 20944 | AGG | 625 | 122 |
| TAAGTTTATTGATGATTGGG  | 15926 | TGG | 624 | 33  |
| CGTGTACGTTAGAGAATGAC  | 40347 | CGG | 623 | 166 |
| CCTATCATCTCTTTGTTGTT  | 16969 | AGG | 621 | 42  |
| GGTACTAATCCGGCAATCAC  | 24313 | TGG | 621 | 81  |
| CGCGGGTCATCAAATTGGT   | 35146 | TGG | 618 | 54  |
| TTTATCTTTTCGCTGAATAG  | 7668  | TGG | 618 | 227 |
| GATTTAGTTAGTGGGTTTGA  | 31927 | TGG | 615 | 48  |
| TGGAAATTCAATGAAGATGA  | 4965  | AGG | 614 | 154 |
| AGCAATTCAATTGCACAGTA  | 13911 | TGG | 611 | 19  |
| AGCAAACGCAAAAACAAGAT  | 15112 | TGG | 611 | 123 |
| ATCACCATAACCTTTAATAA  | 28319 | AGG | 610 | 46  |
| GAAAGTGTATTGCAACAGAT  | 37145 | TGG | 610 | 129 |
| ACTAACAAAACAATACTGA   | 33696 | GGG | 608 | 194 |
| TTATCTGCATTAAAGCGTAA  | 17417 | AGG | 607 | 30  |
| AGCTTTTACTAAACAACAAG  | 37273 | CGG | 607 | 98  |
| TACGTAATTGTTGTGTTGTT  | 39465 | GGG | 607 | 103 |
| GTAGTAGAAGCAATTAGAAA  | 4577  | TGG | 606 | 127 |
| TAACAACATCACCTATTTTA  | 28563 | GGG | 605 | 85  |
| AAAAATACAACCAACTGGCA  | 7602  | CGG | 603 | 163 |
| AGGAATCATGAAAGACAAGA  | 12358 | TGG | 603 | 194 |
| GAAAATCCGGAGCTATCACA  | 10379 | AGG | 601 | 68  |
| CGACACAAATGATTTAGGGT  | 38155 | AGG | 598 | 197 |
| ATAGACAGGTTTACTAAGCA  | 22068 | TGG | 593 | 87  |
| AACAATTCAACCCAGATGGT  | 38240 | TGG | 591 | 113 |
| TTAGCAAATAGTTGTTCTAT  | 17735 | TGG | 591 | 170 |
| TCTAACTTACAGATGATTA   | 32287 | CGG | 589 | 72  |
| TGTTTTTGTCCGTGTCTTTA  | 29361 | CGG | 587 | 90  |
| AATGATGGAAGTATATTGTC  | 7327  | GGG | 586 | 124 |
| TGATGAGGAACTTCGCGGAA  | 33575 | TGG | 586 | 204 |
| TTTACAACGCGCTAAATCAA  | 23758 | TGG | 584 | 116 |
| AAAGCAATACGTGATGATGT  | 18192 | CGG | 583 | 107 |
| AGTTGTCTATAAATATGAGG  | 11843 | AGG | 581 | 193 |
| TGGCGTATTTTGGGCTTTAA  | 25333 | TGG | 579 | 113 |
| AAGAATGACATTGAAATAGA  | 14834 | GGG | 578 | 23  |
| CCTATTGCAAATGCTAATTG  | 9918  | TGG | 578 | 60  |
| ACCTTGTAAGTAGTTAGGGT  | 30647 | TGG | 576 | 56  |
| TGCGCTTCAATAGTGATAGT  | 4339  | AGG | 576 | 96  |
| TTATAGGCTCTCCGTTTGTA  | 16165 | GGG | 573 | 168 |
| ATACTAAACCTGAACGATTA  | 16252 | AGG | 572 | 43  |

|                       |       |     |     |     |
|-----------------------|-------|-----|-----|-----|
| TACTTTGTTAACAAGTTTTT  | 2501  | AGG | 572 | 97  |
| AAGAACTGGAAGAAGAAACC  | 12025 | AGG | 572 | 112 |
| TAAGTACGGTGCTGATAGCA  | 21308 | TGG | 571 | 150 |
| CACAAATAGAAATAGAGCTA  | 3699  | GGG | 569 | 78  |
| TTATGATTTGTATAAGCTGT  | 8936  | TGG | 569 | 78  |
| TGCTAAAGTCATATATACTA  | 39930 | CGG | 569 | 142 |
| ACTGTTGCATCTCTAAAGA   | 7905  | CGG | 568 | 53  |
| TATATTTAAATAACCTCTAT  | 27568 | AGG | 567 | 38  |
| TCAATTAGTTTGTCCGCTA   | 5991  | TGG | 565 | 179 |
| ATCAAGAAACACAAAAGAG   | 17135 | TGG | 562 | 114 |
| TGGTTTATGTTAATTAATCA  | 15132 | CGG | 559 | 68  |
| CCAAAATCATTAAATATTGCA | 8029  | AGG | 558 | 68  |
| AAGATTGAACAAATAGATAA  | 14978 | AGG | 555 | 6   |
| TGCAGTAATGCAATCATTTT  | 30100 | GGG | 555 | 103 |
| ATATATAAAGCAACATGGTT  | 10250 | TGG | 554 | 70  |
| AGCTTTAGTTGCATTATATT  | 23906 | TGG | 552 | 91  |
| ATGAATTGATAAAAAAGAAC  | 9498  | GGG | 551 | 122 |
| TAGTACCAAAGATAACAGCT  | 19896 | TGG | 550 | 18  |
| GGCGAATGGTACACAACATA  | 21615 | TGG | 550 | 168 |
| GTTTTCCGAAAATGGCATT   | 7177  | CGG | 550 | 186 |
| AGAATTGGTTAACACCTCTT  | 30867 | TGG | 549 | 36  |
| TTTTTGATGTCTATTACCCA  | 6034  | GGG | 549 | 52  |
| ATGTATCAAGATACTGCATA  | 38893 | CGG | 549 | 76  |
| GGCTTTCTAGTCTTTGGGTT  | 34375 | AGG | 549 | 118 |
| ATTAAGATTTTATGTTTG    | 11219 | AGG | 547 | 78  |
| TAAACCAAGCAATAGATGAA  | 3515  | TGG | 547 | 150 |
| ACCACTAACTTACCTAAGAT  | 24953 | TGG | 546 | 183 |
| GAAACGTTGAGGCACCTAT   | 8877  | GGG | 545 | 63  |
| TAACCGTATCGATTAAGATA  | 40130 | CGG | 545 | 137 |
| CGTATATTTCTTCTTTTGA   | 29736 | TGG | 544 | 192 |
| ACGCCAAAAGTAACAGGTAA  | 2471  | AGG | 542 | 44  |
| AAAAAGCGCATCTCAACCGA  | 37312 | CGG | 541 | 165 |
| AAGAAAGTTTTAACTTAAGG  | 930   | AGG | 540 | 114 |
| TCAGATACATGGCCTCTGCC  | 40024 | CGG | 536 | 61  |
| GACCGGTTTACCATCATACA  | 40364 | AGG | 536 | 63  |
| TAAATTTAACGAAACGTTTCG | 8867  | AGG | 536 | 78  |
| AAAAGAAATCGATGTTAAAT  | 36631 | TGG | 533 | 47  |
| GTGAATGATAGTGCGACAAA  | 32062 | AGG | 530 | 105 |
| ATTAGACGAGTTAATTAAT   | 10351 | GGG | 525 | 43  |
| TTTAAATGTAGATAACAGGC  | 39758 | AGG | 523 | 73  |
| TAGTAAACCTGTCTATATCA  | 22045 | GGG | 521 | 35  |
| TAACTTATATCATTTCGTCAT | 3617  | AGG | 521 | 84  |
| GGTAAAATGGCAGCAATTTG  | 16685 | CGG | 517 | 30  |
| AAGCAACGTGATGAGCTTAT  | 11438 | TGG | 516 | 136 |
| GACGCGGTATTGATAATAC   | 29897 | AGG | 516 | 141 |

|                       |       |     |     |     |
|-----------------------|-------|-----|-----|-----|
| TTACTCAATTGAATCGCGTT  | 33135 | AGG | 512 | 51  |
| GACTACTTTGTGCGCAGCAT  | 26363 | TGG | 511 | 116 |
| TGTTCCATGCTTTTTCAATT  | 2091  | TGG | 510 | 153 |
| CTGGCACATTATGAAGCAGT  | 5661  | CGG | 510 | 161 |
| AAGAATTATCTTAAGACGTG  | 14305 | GGG | 508 | 61  |
| ACAGTTCGCTACACAATACG  | 21938 | AGG | 508 | 61  |
| GAGTAATCGGAGACGATTTTC | 8417  | AGG | 506 | 6   |
| TAAAAGAATAGCATCATTTG  | 6438  | GGG | 505 | 58  |
| ATTTACAGGGAGCGAGATGCA | 8432  | TGG | 504 | 39  |
| TTTTGATGTCTATTACCCAG  | 6035  | GGG | 503 | 56  |
| TCAATCTTAGCTTTTTCTTC  | 13094 | AGG | 502 | 9   |
| AACTTATATCATTCGTCATA  | 3618  | GGG | 501 | 119 |
| ATACGTGGTATGACATCGTT  | 15423 | TGG | 499 | 74  |
| TATTGAAGAAAGGTTATAAC  | 14104 | AGG | 499 | 122 |
| CATGACCTGTAATAACAAAG  | 4272  | TGG | 496 | 138 |
| TTTAACCTAATAAAATACAT  | 38598 | TGG | 494 | 64  |
| TTAGTTAGAACTTTGGTAC   | 31460 | TGG | 494 | 124 |
| ACATCAATCACACATTCGGA  | 2429  | CGG | 493 | 156 |
| TAGCACTAACACCTGCTGAA  | 23328 | TGG | 492 | 105 |
| AATCATCAATAAACTTAAAT  | 15904 | TGG | 491 | 152 |
| TTGTTATCAAATATTTAAGG  | 1710  | TGG | 490 | 149 |
| AGCTAGTTATTTCTGTAATT  | 9166  | TGG | 488 | 81  |
| TAATATCGTAAAAGCGTTAG  | 25177 | TGG | 487 | 63  |
| ACAGTTTCAGGACCCCAACC  | 38547 | AGG | 487 | 125 |
| AGAGCATGGTCAGAACAAGT  | 25082 | AGG | 486 | 6   |
| TCTGATATAGAGGGTATTGA  | 26899 | TGG | 486 | 167 |
| GCGAGAAAAGTAAGAGTAAT  | 8404  | CGG | 485 | 49  |
| TATTACTTATACCGAGAAGA  | 8637  | TGG | 484 | 106 |
| AGGAAAGCGAGCATGGAGGA  | 29519 | CGG | 484 | 135 |
| ACATACTTTTTGATTGAGTA  | 20756 | AGG | 483 | 37  |
| TGCTATGCATGCTGTA AAAG | 5932  | TGG | 483 | 110 |
| CGATAATTTGAGCGACTGCT  | 25275 | GGG | 481 | 34  |
| TCATCCAAATTGAAAAGCA   | 2103  | TGG | 477 | 9   |
| TGCCTTGCATAGGATTCCT   | 352   | TGG | 476 | 81  |
| AAATGAAGCTGATTTAGATA  | 18759 | TGG | 476 | 130 |
| AATAGTTGGACAGGTTCTCC  | 34751 | GGG | 471 | 40  |
| TACAAAAGCTTTACCATAGG  | 5994  | CGG | 469 | 96  |
| GTGACATGCTTGGGTGAACA  | 39861 | AGG | 468 | 145 |
| CCAGCAAAGTATTCTTTGAT  | 15791 | AGG | 466 | 105 |
| TAACCTCACAGTCATATCTA  | 11275 | AGG | 465 | 42  |
| TTCTTCAATACTGTCTTTAA  | 28064 | AGG | 464 | 109 |
| TCATTTAGATGGGGAATCAG  | 18374 | TGG | 463 | 29  |
| AGATGTTAAAGCTAATGATA  | 27465 | AGG | 463 | 73  |
| TTATTAGCTGACTTACAAGA  | 22218 | AGG | 462 | 28  |
| TAATTAAGGGGTGATTTTAA  | 37404 | TGG | 462 | 100 |



|                       |       |     |     |     |
|-----------------------|-------|-----|-----|-----|
| AGGAGGCAACCAATGGCTTA  | 29618 | CGG | 459 | 34  |
| TAACTAGCCACTGTGTATAT  | 13350 | AGG | 459 | 99  |
| GTTAGCACTAATGGGTGATT  | 20227 | GGG | 459 | 139 |
| ATTTTCCCTTGTGATAGCTC  | 10369 | CGG | 458 | 15  |
| CTTATCAAATACCGTGTCTT  | 10514 | TGG | 458 | 122 |
| ATAACAATTGCTTGTTGGTC  | 12249 | GGG | 457 | 10  |
| TTTGCCGATTAATTCCGCTC  | 26324 | CGG | 457 | 15  |
| GACACCAATTTCTTCAGAAA  | 756   | GGG | 455 | 112 |
| GAATGACGGTATGAATATAT  | 6337  | CGG | 455 | 173 |
| AACAATACGCCGTAAAGACA  | 29368 | CGG | 454 | 31  |
| ACATTGCCTGGCGTGTATGT  | 19534 | TGG | 454 | 172 |
| GAGAAATATAAGCGAAAAGG  | 18600 | TGG | 453 | 71  |
| TGGTAAGCCTATAGGTGGTT  | 39276 | TGG | 452 | 14  |
| TAACCGTATCTTAATCGATA  | 40143 | CGG | 452 | 110 |
| CAACGACTCTAAAACGTATA  | 37030 | CGG | 451 | 19  |
| TCCAAAGCCCCTTGTAAATA  | 23060 | CGG | 449 | 113 |
| AACCGTTTTATATCCAGGC   | 27632 | TGG | 448 | 56  |
| TCATGTTCCGGTAAATTTATA | 9457  | TGG | 448 | 116 |
| AAAACCTGGGAACTTGTCTT  | 6720  | TGG | 448 | 156 |
| AAACATCCAGTGACATGCTT  | 39870 | GGG | 448 | 161 |
| TAAAACCGCTCTATATTTAA  | 6384  | CGG | 447 | 18  |
| ACTTACTTAGCAAAAGGTGT  | 19706 | AGG | 446 | 44  |
| AGAAAACTTGTGTACTAAA   | 93    | AGG | 446 | 46  |
| TTATCATGATGTTACAAAAG  | 637   | AGG | 445 | 118 |
| ATTAAGTGGTACGTAGACAT  | 33804 | GGG | 445 | 156 |
| TTTGATTACAATCCATTGTT  | 16958 | TGG | 443 | 65  |
| AGAAACATCAATCACACATT  | 2425  | CGG | 441 | 119 |
| TACACAAAATACAAAATCTA  | 32578 | CGG | 440 | 3   |
| TCATCACCTTTAAAACCTCCA | 21575 | CGG | 439 | 38  |
| ATTGAAGAAAGGTTATAACA  | 14105 | GGG | 438 | 56  |
| TGATTACGAATTAGACGAAA  | 17596 | TGG | 437 | 13  |
| TTATCTAGATTGAAGCCCAA  | 30182 | CGG | 437 | 88  |
| TATAACGGCAATGACACAGA  | 11682 | GGG | 437 | 162 |
| GACGGTAAACATACCTATAG  | 27571 | AGG | 436 | 92  |
| ACAGGAGAGGTAGACAAGGC  | 39580 | AGG | 434 | 27  |
| TGTAAAGTCCATTGAAGAAA  | 19476 | TGG | 434 | 101 |
| GGCTAATTACAGATATCCTA  | 34564 | AGG | 433 | 48  |
| TTAAAAGATTTTATGTTTGA  | 11220 | GGG | 428 | 15  |
| GAAAGGTGATAAAGGCGAAC  | 36781 | CGG | 428 | 21  |
| AAAGACTTTAAAGGTATTGC  | 31352 | AGG | 427 | 31  |
| GCTTCAATTCCTTTATCTCC  | 22331 | AGG | 427 | 67  |
| TAGTATTAGGAGACTTTACA  | 28698 | AGG | 427 | 69  |
| AACGATGTGTACTTTGATTT  | 33262 | AGG | 426 | 33  |
| CGCTGATAAAAGTAAACTAT  | 16058 | CGG | 426 | 37  |
| ATTGAACAAGCGCAAGCTAA  | 23405 | CGG | 426 | 151 |

|                       |       |     |     |     |
|-----------------------|-------|-----|-----|-----|
| GCCAGTAATTGTTGAGTCAT  | 34865 | TGG | 424 | 125 |
| TCAAAGTATGGTGGCGGAGC  | 38446 | TGG | 424 | 173 |
| TTAGTGAAAACAACTTTCT   | 33455 | AGG | 422 | 36  |
| CCACAAATAGAAATAGAGCT  | 3698  | AGG | 418 | 66  |
| CTATATGTGTTTTCTGGTGT  | 2811  | TGG | 417 | 87  |
| CAAAGTCGAATATTGGTAAG  | 34440 | AGG | 416 | 34  |
| TACAAGGCACTGATGATGAT  | 29184 | TGG | 416 | 93  |
| ACTTTAAATATTTTCGATGGT | 21466 | GGG | 416 | 107 |
| TTACAAACAAAATCGAACAT  | 1802  | CGG | 414 | 8   |
| AACTTTAGATGCTATCCAGA  | 34086 | GGG | 414 | 101 |
| TCGGTTGATTCTATATCTAA  | 6310  | CGG | 414 | 157 |
| TCATACTTAATTGAATTGTC  | 27063 | TGG | 413 | 9   |
| ATCACTAGTATTTTTGAATC  | 29296 | TGG | 413 | 43  |
| AATTTAGATGCATCTACTTT  | 28096 | TGG | 413 | 58  |
| GGCAGAGCAATGTCACAAGC  | 18258 | TGG | 413 | 93  |
| CAAAAGGTGTAGGCGCCTAC  | 19716 | TGG | 412 | 50  |
| TCATTTGGTCAAACTGGAA   | 38512 | CGG | 410 | 89  |
| CCAACAAAATAACATTATA   | 16753 | GGG | 409 | 11  |
| GATACTTTGCCGTTATTACA  | 23067 | AGG | 409 | 57  |
| ATTCAATCAATTGTTTTTCT  | 4834  | TGG | 408 | 42  |
| CAGTTTTAATACCGTATTCG  | 10810 | TGG | 407 | 34  |
| ATTGAAGAATTTGATGATAA  | 4433  | CGG | 407 | 39  |
| CAGGAGAAAGCGCAAGTGGT  | 39005 | GGG | 407 | 67  |
| GAGAAAACATGTTGTTAAGT  | 23959 | TGG | 407 | 134 |
| TTTTTGAACATACTTGTCAA  | 19363 | AGG | 406 | 101 |
| GGCAATACATGCAATCAGTT  | 25971 | TGG | 405 | 11  |
| TAAGTGACATCGAACCAGTA  | 9733  | CGG | 405 | 20  |
| TGTACGTCTAACGGCTTACC  | 12027 | TGG | 405 | 20  |
| AATGAATGTTAAGCGAATAT  | 35704 | GGG | 403 | 105 |
| CGTTACGAAATAAGAGAACC  | 23483 | TGG | 402 | 51  |
| AGAAAACAAGGTATGACTT   | 489   | TGG | 402 | 74  |
| GAGAATTACAAGGAAATCAT  | 23226 | GGG | 401 | 21  |
| AAAATCCGGAGCTATCACAA  | 10380 | GGG | 400 | 100 |
| AGCCTGTAACACTTACATAA  | 34773 | GGG | 400 | 114 |
| GGAGAAGAAAGCAAGTGCAT  | 11497 | GGG | 399 | 5   |
| GACGTTAATCTGGAAAGATG  | 10687 | GGG | 398 | 61  |
| AGGAAATATCTCAGTTATTA  | 27513 | AGG | 398 | 82  |
| CTTATATTGGGTTAAATCAC  | 38946 | AGG | 397 | 35  |
| TAACCGACACTTCAAAGTA   | 27237 | TGG | 397 | 52  |
| TGTTCAGAACTTATAGATAA  | 31662 | CGG | 397 | 108 |
| GAACCACAATTTTCTTCT    | 6585  | AGG | 396 | 11  |
| ACTTTAAAGGTATTGCAGGT  | 31356 | TGG | 396 | 68  |
| TCACATCATTTGGTCAAAC   | 38507 | TGG | 395 | 107 |
| TTTTCAACAGGATTTAGTGA  | 10412 | TGG | 394 | 44  |
| CTTGTTAAAAACGGCGGTCA  | 30224 | CGG | 394 | 174 |

|                       |       |     |     |     |
|-----------------------|-------|-----|-----|-----|
| TTTGAGCTTGATTATGTTGA  | 27136 | TGG | 393 | 46  |
| GTTTTTCGTCTGATGGAGTA  | 35535 | GGG | 392 | 4   |
| ACCTCTACTTCTGCTTTTAG  | 5291  | TGG | 392 | 95  |
| TTTAAATTCTTTTTAACTTC  | 20807 | AGG | 386 | 85  |
| ACTTTCAAAGTATGGTAGTT  | 27229 | CGG | 386 | 113 |
| ATTTGCCACATTTTAGTGTC  | 36871 | AGG | 385 | 149 |
| TCTAGAGCACCGTTAAAGAA  | 9976  | TGG | 384 | 21  |
| AGATATGCTGGGTTCTGTAT  | 30949 | TGG | 383 | 58  |
| CACCCTTATGTAAGTGTTAC  | 34787 | AGG | 381 | 14  |
| TTATGTTAGCGACAGGCGAA  | 38300 | AGG | 381 | 72  |
| AACGTCCAGCAAATAGTGCT  | 27008 | TGG | 381 | 99  |
| TTAGATCGTTATCATTGAA   | 19090 | AGG | 378 | 107 |
| CCTGCATCTCTAAACGCTTT  | 31045 | CGG | 376 | 65  |
| AACACAACAATTACGTATGA  | 39487 | CGG | 372 | 77  |
| TATCTAGACCCTCAGCTTCT  | 30750 | TGG | 370 | 28  |
| TTACTATAACTAAAATTATG  | 33320 | GGG | 370 | 45  |
| TAATTAAGTAAAGTGATTA   | 37371 | GGG | 370 | 50  |
| GCTAATTACAGATATCCTAA  | 34565 | GGG | 370 | 105 |
| TGATGCCGAAATATCGAGTG  | 10912 | TGG | 369 | 37  |
| GATCTTATACGAAGTAAAGA  | 13617 | AGG | 369 | 78  |
| ATTCTTAAGTTGTCTTTCAG  | 30455 | TGG | 367 | 23  |
| GCTGTAGTGAAGTATAGAAA  | 3134  | CGG | 366 | 36  |
| TAAATGGAACAAGTGATATT  | 24174 | TGG | 366 | 63  |
| AAACAATCAAGAGAAAAACA  | 500   | AGG | 366 | 95  |
| TTACAAGCATCAGATGCTTC  | 20318 | TGG | 365 | 24  |
| ATCAAATCAATTGGAACGAT  | 28973 | TGG | 365 | 81  |
| ACTTGTTCTTTATGATAATA  | 16121 | TGG | 365 | 118 |
| AGCGTTTGATGAAATACTTG  | 11744 | AGG | 364 | 6   |
| TGATATTGATGAGTATATCG  | 17705 | AGG | 364 | 9   |
| ATGAAAATATAAGGGAGTGT  | 12626 | GGG | 363 | 83  |
| TACATACTCCAAACAATTGA  | 2882  | TGG | 362 | 31  |
| TATACTATCTGTCAAAGTAG  | 26540 | AGG | 361 | 79  |
| GGATTGAAATGTGAGAGATG  | 7747  | TGG | 361 | 96  |
| TTTACTCAAGAAAAATGGAG  | 20639 | TGG | 359 | 88  |
| TAAAGTAGTGCTACTTGTTT  | 33214 | TGG | 358 | 76  |
| ACTAAGCAAGATGTAGTATT  | 28685 | AGG | 358 | 99  |
| TTATCCAGTGTTATAAGTGT  | 21489 | CGG | 356 | 12  |
| GAAACTCATAGATGAGGCAC  | 8507  | AGG | 356 | 36  |
| CTTTTGCGATAGCGTATGCT  | 8060  | AGG | 356 | 54  |
| TTAGGTAAAACATCAGGTTT  | 33280 | TGG | 355 | 131 |
| GACTTTAAATATTTTCGATGG | 21465 | TGG | 354 | 161 |
| AATAAATACCATTTATTACC  | 829   | GGG | 352 | 10  |
| TGGACGATCACTCATGTTGA  | 27884 | AGG | 352 | 10  |
| ATTTAAGTTTATTGATGATT  | 15923 | GGG | 352 | 38  |
| TATTTTTGAGTAATCGTGTA  | 23240 | AGG | 352 | 54  |

|                      |       |     |     |     |
|----------------------|-------|-----|-----|-----|
| GGATTCTGAAATAGGTAAAA | 16672 | TGG | 352 | 108 |
| ATAATAAAATTATACCAGAA | 6865  | AGG | 351 | 55  |
| TCCTAAGTCGTCCTGACAAT | 7007  | TGG | 350 | 27  |
| TTTAATTCTGACGAGTTTAA | 17285 | CGG | 350 | 58  |
| TAAATCTTTTTAGAGTTATA | 32910 | AGG | 350 | 105 |
| ATGGAATCAAGATTTTAGGT | 7464  | TGG | 349 | 42  |
| GCTCTCTCGTTGCATAATTC | 9614  | TGG | 349 | 61  |
| ATGACCCGCGTCACCCTAAT | 35175 | TGG | 349 | 122 |
| CCAAAAACACTGTTGTATCA | 40303 | AGG | 348 | 43  |
| GCACATATCCATGTAGTGAA | 10146 | TGG | 346 | 64  |
| TCTGATTAATATTTCTAAAT | 3009  | TGG | 346 | 95  |
| TATATTGGGTTAAATCACAG | 38948 | GGG | 345 | 50  |
| ACAAGACAATGCCCTATGAG | 29342 | TGG | 345 | 67  |
| ATCAATATCGCAAATGTTGA | 36959 | AGG | 344 | 35  |
| CAATTTGCGGATATGGTGCT | 16698 | AGG | 343 | 101 |
| TCATACCATCTAAACTAGCG | 14868 | AGG | 342 | 32  |
| ATCTAATCGAACAAGAAGTA | 19145 | CGG | 342 | 81  |
| GCGAATGTAGTTGACTCAGA | 33175 | CGG | 342 | 87  |
| AGTATAAAAGAATGTTTATA | 10613 | TGG | 341 | 78  |
| TGAACGACACAAATGATTTA | 38151 | GGG | 339 | 56  |
| TATCTGCATTAAGCGTAAA  | 17418 | GGG | 337 | 2   |
| AGATGGTCCTACTACTATTG | 34667 | CGG | 337 | 71  |
| CATTAAACTTTTTATGTGT  | 33761 | GGG | 336 | 36  |
| ATAATCCAACATCTCAAGAA | 38028 | GGG | 336 | 53  |
| ACTATGAAGGGGATATCAAT | 10471 | TGG | 335 | 73  |
| AAAGTTTACTTATTGTTTCT | 6095  | AGG | 334 | 34  |
| TTAATTTTTAATGTTGTAAT | 22772 | TGG | 334 | 70  |
| GAAGTACGACGAAAGTTATT | 7641  | GGG | 333 | 19  |
| ATGGCGTTGCGCAACCTGGT | 38549 | TGG | 333 | 77  |
| TTACCTATCAATTGTGCTAA | 28396 | TGG | 332 | 69  |
| ATTAATCGGCAAAGTAGCTG | 26350 | AGG | 332 | 83  |
| TAATAAACTTTAGAACAAAC | 27615 | CGG | 332 | 88  |
| GGCGTTATTCCAGCAGAACA | 19595 | AGG | 329 | 48  |
| AGACAAGCAGAGCAAATAAG | 29147 | AGG | 329 | 48  |
| AGCGACAGGAGAGGTAGACA | 39576 | AGG | 329 | 50  |
| CGTAACTATTCTGATATAGA | 26890 | GGG | 327 | 20  |
| TCCACTAAAAGCAGAAGTAG | 5306  | AGG | 327 | 48  |
| CTTGGTCGTCATATCCAAAT | 5134  | TGG | 326 | 45  |
| TCATTCATATTAGCCATCAT | 13166 | AGG | 326 | 56  |
| GGTTTGTTAGTTATATAAAT | 3630  | TGG | 326 | 85  |
| TATCTGACTGTTGGTCCCAC | 40056 | AGG | 326 | 99  |
| TATCTGTCGTTAAATATATT | 30373 | CGG | 325 | 59  |
| GTAAGTCGTAAGGTACATAT | 21141 | AGG | 321 | 8   |
| CGACTAAAGGAGGCAACCAA | 29611 | TGG | 321 | 24  |
| GGAACAACGGTACTGACGA  | 4004  | AGG | 320 | 95  |

|                       |       |     |     |     |
|-----------------------|-------|-----|-----|-----|
| TTTACACCAATAAATAGCTT  | 18425 | GGG | 320 | 97  |
| TTAATTAAGTAAAGTGTATT  | 37372 | AGG | 319 | 53  |
| AAGTACCGTCGTTATCTTTC  | 5203  | TGG | 318 | 14  |
| TTAATAATTGTCTTTGATCT  | 23367 | AGG | 317 | 5   |
| CATTTCCCTTCTTGAGATGT  | 38017 | TGG | 317 | 85  |
| AGCTGGACTTGATAGCGCAA  | 18275 | TGG | 316 | 83  |
| CCTACTAAAAACACCCGAA   | 7798  | TGG | 316 | 138 |
| TTATTCATCTGGATTTGTAC  | 34603 | CGG | 315 | 80  |
| GAATATAACGTTACAGGCGC  | 26860 | AGG | 314 | 105 |
| AGAAAAGTTTGTTTTACTAA  | 33474 | CGG | 313 | 19  |
| AAAATAGAATAGTTTGTGTA  | 33054 | CGG | 313 | 28  |
| ACGTCATCAAATTCCTTTAT  | 16181 | AGG | 313 | 97  |
| AACTGCCATTGTGATGAGGA  | 2564  | GGG | 313 | 124 |
| TCGCGAGTAAAGTAGCTGAT  | 26232 | GGG | 312 | 36  |
| TTTGCAGTATACGGAAAAAT  | 3917  | TGG | 312 | 80  |
| CATGCAAGTTTTAGGTGTTT  | 25738 | TGG | 312 | 91  |
| CATAGAGGTCGAAAAAGTGG  | 10881 | AGG | 311 | 8   |
| GCAACAATGAGAGAAACAGT  | 21894 | CGG | 311 | 25  |
| GTCTGATTTGATGAGGGCGG  | 13790 | AGG | 311 | 62  |
| CTAGCCAATTAGGGTGACGC  | 35163 | GGG | 310 | 61  |
| TGTTTACCCATATATTGTTG  | 21839 | TGG | 310 | 112 |
| GTTATCGGATTCGTTAATAC  | 33381 | TGG | 308 | 31  |
| CAGGTCGTTGATAAATACTCT | 20788 | AGG | 308 | 32  |
| AAAGCATAAAAAATGGTATT  | 3048  | AGG | 308 | 73  |
| TCCTGCCGTTAAATATAGAG  | 6373  | CGG | 308 | 138 |
| ACAAGGTATTATGAGTGGAG  | 18152 | AGG | 307 | 70  |
| GCACGTTACGGTATCTTACA  | 20255 | AGG | 306 | 34  |
| AAACTACCCACCATATAGGC  | 14399 | AGG | 305 | 39  |
| TAAGAATGACATTGAAATAG  | 14833 | AGG | 305 | 48  |
| ATTTCTACCTGTGCTGTTTC  | 31124 | TGG | 304 | 14  |
| TAATTATTTCAACAAATGAA  | 6470  | TGG | 304 | 100 |
| TTCATTTTAAAAGGTCATAT  | 3400  | GGG | 304 | 113 |
| TGGATTTAACTAGAATAACT  | 25431 | GGG | 303 | 39  |
| CTTCCGCCAAGATGACGATT  | 5883  | AGG | 303 | 53  |
| ACCAATCTTAGGTAAGTTAG  | 24938 | TGG | 303 | 63  |
| TTATATTGGGTTAAATCACA  | 38947 | GGG | 302 | 10  |
| AGTGGTATAGGAGCTATACG  | 15408 | TGG | 302 | 17  |
| CAGATGAATAACGATAGAAT  | 34575 | CGG | 301 | 92  |
| GTATGCTCAGATGTTAAAAG  | 14021 | AGG | 300 | 49  |
| TGAACAAAGGTTATATAGTT  | 12993 | GGG | 300 | 50  |
| TTTAAAAGAATAGCATCATT  | 6436  | TGG | 300 | 80  |
| AACAGAATGAACTATGAAAC  | 11351 | AGG | 299 | 19  |
| GAATCATTTAAATTAACAAT  | 22317 | TGG | 299 | 42  |
| TACCTTGTTACGCGGTAT    | 17096 | GGG | 298 | 100 |
| TTTCTGTTCAATTTAGAGTT  | 14132 | AGG | 297 | 130 |

|                       |       |     |     |     |
|-----------------------|-------|-----|-----|-----|
| CCGACGGTTAAAATTTGGAC  | 37328 | AGG | 296 | 51  |
| AAAAGGTATCTACTTCACAA  | 36196 | GGG | 295 | 34  |
| TCCGAACCTATTCCGTTGCC  | 34636 | AGG | 294 | 56  |
| CTAATAAAAATGATATGGAT  | 39203 | TGG | 293 | 20  |
| TGTACACGAGCATAGCTACC  | 23485 | AGG | 293 | 35  |
| CTCATCAATATCATTCTGAT  | 17679 | TGG | 293 | 46  |
| TGAGTTGTTTCGACAAAGATA | 17164 | TGG | 292 | 50  |
| GAAGAATATGCATTGATCAC  | 33840 | TGG | 291 | 50  |
| TTCCTAAAAGCTGGATTGTA  | 29485 | TGG | 291 | 72  |
| TCATACTACGCCAAATATTA  | 35319 | GGG | 290 | 2   |
| TGTATTAGCTGATGTAATAC  | 13880 | CGG | 290 | 129 |
| TAACGACCCTGAAAAATGGT  | 27297 | CGG | 289 | 74  |
| ACTAGTGTTTGCATATAATA  | 10577 | CGG | 288 | 10  |
| CGAAAGATAGCAGACGAAGA  | 15219 | AGG | 287 | 31  |
| CGTTCAATAAATGTGAAAGG  | 14452 | AGG | 287 | 32  |
| AAAAGGTGTAGGCGCCTACT  | 19717 | GGG | 286 | 11  |
| TTAAAAGAATAGCATCATTT  | 6437  | GGG | 286 | 18  |
| GCAATACCTTTAAAGTCTTT  | 31333 | AGG | 286 | 25  |
| CCAGCAAAGCAATCATGGG   | 36032 | CGG | 286 | 85  |
| GGAATATATATAAAGCAACA  | 10245 | TGG | 286 | 99  |
| TTACAACATCGTCGATAATA  | 36441 | AGG | 285 | 96  |
| ATCATAAAGCGTATATACAA  | 8968  | GGG | 285 | 114 |
| CTTTAATAGGGGTAECTAT   | 30821 | TGG | 284 | 5   |
| ATTGACGCTTTGCAAGAAGT  | 16919 | TGG | 284 | 29  |
| GCATTAGCTCCTGTTGACTT  | 21423 | AGG | 283 | 13  |
| TGAAAGAGTTAAATTTGGAA  | 11575 | TGG | 283 | 64  |
| GAAGTTGAACAACAAATCAA  | 32221 | TGG | 281 | 31  |
| CAAAGCAGAACCTGAGTTAT  | 36931 | TGG | 281 | 44  |
| TTAGTTTTTAAAAATTCTT   | 8442  | TGG | 281 | 50  |
| CTAACAAAACAATACTGAG   | 33697 | GGG | 280 | 55  |
| GTATCAGGATAACGAGCGAG  | 10124 | TGG | 279 | 39  |
| AAAAAGGTTATCAAACACGC  | 36506 | TGG | 279 | 44  |
| TCGCTATTGCGTTAGATTGG  | 6827  | GGG | 278 | 30  |
| AAAAGCAGAAGTAGAGGTTT  | 5312  | CGG | 277 | 80  |
| TGGCGTTGCGCAACCTGGTT  | 38550 | GGG | 276 | 12  |
| CCGAACCTATTCCGTTGCCA  | 34635 | GGG | 276 | 63  |
| ACGACAATATCCAACCTTTG  | 38400 | CGG | 276 | 80  |
| GTTGATTTTCGTGCCACTGTG | 994   | CGG | 276 | 126 |
| TGAAGTACGACGAAAGTTAT  | 7640  | TGG | 275 | 27  |
| ACATTAGTGGAGTATTAAC   | 20899 | AGG | 275 | 29  |
| AACACGAGCACAAACGAGCT  | 35680 | CGG | 275 | 85  |
| GGATCACGTGAATGTTTTTG  | 9712  | TGG | 275 | 98  |
| AATACTGTCTTTAAAGGAAC  | 28070 | GGG | 275 | 106 |
| TCTCCAGTATCAATTAACCT  | 13220 | AGG | 274 | 67  |
| AGTAATCGGAGACGATTTCA  | 8418  | GGG | 273 | 32  |

|                       |       |     |     |     |
|-----------------------|-------|-----|-----|-----|
| CCAGAAAGGAGATAACGAAA  | 6879  | TGG | 273 | 37  |
| AAACTTACCAATAAGATCAT  | 4908  | TGG | 273 | 47  |
| GCGATCAGTCTGATTTGATG  | 13783 | AGG | 273 | 57  |
| AACGCTTAAACCAACTGAAT  | 20431 | AGG | 272 | 37  |
| TTGAACGCTGCAGGAAGATT  | 24785 | TGG | 272 | 68  |
| CCAGACGATGAATCTGTAAT  | 11148 | AGG | 271 | 4   |
| TGACACAACACAAACATCAG  | 27198 | GGG | 271 | 29  |
| ATAGCGCAGACATACAAGCT  | 13526 | AGG | 269 | 27  |
| TACGTCAGCGATTTATAATC  | 30412 | CGG | 269 | 27  |
| AGATATGACTGTGAGGTTAA  | 11295 | AGG | 269 | 70  |
| ATATACGTTGAATACGGTAC  | 21525 | TGG | 266 | 60  |
| ATATATGCTACTGGTCCTGG  | 21549 | TGG | 264 | 16  |
| GCATTCTCTGTCGCAGGTCT  | 24416 | TGG | 264 | 85  |
| CTACCATACTTTGAAAGTGT  | 27250 | CGG | 263 | 55  |
| TTTGAAGCATTGAATAGCAT  | 24740 | AGG | 263 | 75  |
| TAGATAGAGTGTGTTGACTTG | 10031 | TGG | 262 | 3   |
| AGGATCGTTATAACCATGAC  | 38725 | CGG | 262 | 33  |
| GGCTTATTGGTGGTCAGGAT  | 23358 | AGG | 261 | 37  |
| GGGAGAAAAGGAGCAATGCC  | 22899 | AGG | 260 | 36  |
| AAAGCAATTATGAAAAGAGT  | 194   | AGG | 260 | 49  |
| AAAAAGTAGAGCTTAAGATA  | 26954 | AGG | 260 | 54  |
| TATGCAATATACGTTGAATA  | 21519 | CGG | 260 | 100 |
| AGGGTTTCGCAAATAATTT   | 37660 | AGG | 259 | 15  |
| TCAATTATCGGCTTTTTAAC  | 25997 | TGG | 259 | 49  |
| CATGTTATTTGGCGTTCAAG  | 15362 | TGG | 259 | 78  |
| TTTCAATATCAACTATGAAG  | 10482 | GGG | 259 | 100 |
| AAAGTTACATTACAGCCCCCT | 6034  | GGG | 258 | 45  |
| AATAGGTGATGTTGTTAGAG  | 28585 | TGG | 257 | 6   |
| AGTTGTTGGCTTTGGTGCAA  | 24439 | TGG | 257 | 31  |
| CGAAACGTTTCGAGGCACCTA | 8876  | TGG | 257 | 84  |
| CACAGTAAAGTAAGTGGTAT  | 15396 | AGG | 256 | 1   |
| AAAAAGAACGGGTAACTCC   | 9509  | TGG | 256 | 68  |
| CAGTCTTGTCGGTTACAAAG  | 20547 | AGG | 255 | 47  |
| TTACTTGTA TAGATGATAT  | 8230  | GGG | 254 | 3   |
| AAATGATTCTGACATTGCAT  | 22287 | TGG | 254 | 119 |
| TGCAAACCCCGCTAAAATGG  | 23989 | CGG | 253 | 68  |
| GTTGTCTCAAATGTAGGTGA  | 26264 | CGG | 252 | 19  |
| GAGTCAATTGTTAATATGAT  | 13836 | AGG | 252 | 39  |
| GCGTGTTTGATAACCTTTTT  | 36487 | AGG | 250 | 1   |
| AGTTCGGATTTTAGTAGCTA  | 24227 | AGG | 250 | 65  |
| TCAAATGCTTGTTTGTCCTTT | 27102 | TGG | 249 | 9   |
| CTCTTATCACCTTCGTTTGT  | 27318 | AGG | 249 | 18  |
| CTTCTTCATCTACTGGTAT   | 37939 | CGG | 249 | 37  |
| TCAACGCTACCTGGTAAATC  | 32823 | CGG | 249 | 79  |
| TATTATGTACGAGTTAATCA  | 29572 | AGG | 248 | 82  |

|                       |       |     |     |     |
|-----------------------|-------|-----|-----|-----|
| GACGGCTAATGATGATGTAG  | 13736 | AGG | 247 | 39  |
| GCCTTTGGATACTCATTTTA  | 23608 | TGG | 247 | 39  |
| ACCAACCGAAATGCCATTTT  | 7188  | CGG | 247 | 42  |
| CCTAACAAACAAAGAGATGAT | 16985 | AGG | 247 | 52  |
| GGTAAATCCTAGAATTGTTA  | 27993 | AGG | 247 | 68  |
| AACCCTCTATCAACATAGCT  | 390   | TGG | 247 | 101 |
| CAAGTGCTAATTAACCTGAA  | 17522 | GGG | 246 | 25  |
| TTGGTATCAAATCTAAGCT   | 4889  | AGG | 246 | 36  |
| CATTGATCATATAGTTGTAA  | 34987 | TGG | 246 | 65  |
| GCTAAATGAAGATAGTTCTT  | 27802 | TGG | 244 | 11  |
| CCGGGACAACCTGGTGCAA   | 36800 | AGG | 243 | 14  |
| CGATAAGAAAATAGAAGAGT  | 21350 | GGG | 243 | 68  |
| GTAATATCACTTAGATATGC  | 30961 | TGG | 243 | 73  |
| CATCATTCTTTTTATAAAAC  | 32594 | GGG | 241 | 47  |
| GCAACAACATAAGATGACAG  | 32727 | AGG | 241 | 82  |
| CATGAAGTTGCATTATACGG  | 38851 | TGG | 240 | 58  |
| GTTTTAATGTCTTTAAAGT   | 33731 | TGG | 240 | 87  |
| GCTGATAAAAGTAAACTATC  | 16059 | GGG | 238 | 26  |
| GCTTTTTGCTTATCTGTCTT  | 5042  | CGG | 236 | 2   |
| TGCTTGTAACGTCGTAAACG  | 20288 | TGG | 235 | 31  |
| TCTATCAATAAATTGTCCGT  | 30182 | TGG | 233 | 2   |
| ATTGAAATGAGGTGCATACA  | 34363 | TGG | 233 | 19  |
| GCATAAAAAATGGTATTAGG  | 3051  | AGG | 233 | 43  |
| GCAGCTTCAAACCACTCTTT  | 22556 | CGG | 233 | 44  |
| CGACCTCTATGCTTGCAAGT  | 10853 | TGG | 233 | 68  |
| AATCTATCAACTAAGGATGT  | 19287 | TGG | 232 | 24  |
| TTAATTAAGTTATCGATATC  | 9098  | CGG | 232 | 47  |
| CAGTGCCTTGTAAATATGATT | 29157 | AGG | 232 | 48  |
| GGACATGAAGTTGCATTATA  | 38848 | CGG | 231 | 5   |
| TAAAAAGCGTTTTAGCGCTT  | 1903  | GGG | 231 | 10  |
| AAACAACAACGAAATATATG  | 11087 | CGG | 231 | 33  |
| AATAGGATCTGTGGTTTTGT  | 40170 | TGG | 231 | 51  |
| GAATGTTTTAAAAATTCATT  | 31800 | CGG | 231 | 53  |
| AATTATCGTTTATCTGAATT  | 39172 | AGG | 229 | 5   |
| GAATTTAAAGTCAAGAAGTA  | 20837 | TGG | 229 | 33  |
| TGAATAAACCTACTATGATT  | 25845 | TGG | 228 | 28  |
| AGTAAATATAGAAAAGCAAC  | 38090 | AGG | 228 | 53  |
| CGATATTTGATATTTAGAGG  | 8827  | TGG | 227 | 7   |
| AAAACCTGTGATTAGTAGCA  | 2641  | GGG | 227 | 31  |
| TGTGGTACATTAAACAAATG  | 9694  | TGG | 227 | 40  |
| TGAATATCATACAAGTTTG   | 25785 | TGG | 226 | 45  |
| GTTTCAACTTATTATAAGGG  | 26739 | AGG | 225 | 35  |
| ATTCGACTAAAGGTAAGAGT  | 14664 | GGG | 223 | 19  |
| ATAGATAGTTTTTTATTGTC  | 5315  | CGG | 223 | 22  |
| TTACTCGTTTCTACTCAT    | 5540  | AGG | 222 | 61  |



|                       |       |     |     |     |
|-----------------------|-------|-----|-----|-----|
| AACTAGGTGTAATGGACGCT  | 11379 | AGG | 222 | 92  |
| TACGGTGCATATAAATTACTT | 35942 | CGG | 220 | 42  |
| ATCAGAATTTTAAATCAAGT  | 18403 | GGG | 220 | 58  |
| GCCAATGACTCAACAATTAC  | 34880 | TGG | 219 | 38  |
| CTCATCTCCTGTAAAATTTG  | 4066  | AGG | 219 | 58  |
| CGACTGCTTCATAATGTGCC  | 5644  | AGG | 219 | 86  |
| TATTACCGCAAAGATAATTT  | 2947  | AGG | 218 | 10  |
| TTCAGGCAAGGTGCATGCTC  | 31836 | AGG | 218 | 35  |
| TTATCCACGAGTCATGCAAG  | 5782  | TGG | 217 | 32  |
| AATACACTTTACTTAATTA   | 37391 | GGG | 217 | 57  |
| GCGATTCATGGTAAGCCTAT  | 39268 | AGG | 217 | 69  |
| ATGGATTTATTCAGCTGTAT  | 30283 | TGG | 216 | 7   |
| ACAAGGAAGATGTCTCCTGT  | 40055 | GGG | 216 | 19  |
| GATAAATCAGTGATAAATTC  | 30049 | CGG | 216 | 50  |
| ATGTTCTTTATGTTAGCGAC  | 38293 | AGG | 216 | 60  |
| AAGCGTTAATACGTGGTGTT  | 35262 | TGG | 215 | 37  |
| AAATGGTTTGACAATTCATT  | 38215 | AGG | 215 | 38  |
| AGGTGATTACCATGCTTAAA  | 34249 | GGG | 214 | 8   |
| TGGTTACACGGTTATTGGGC  | 29204 | AGG | 214 | 17  |
| CAGTTGTGACGTGGAAGGTT  | 2598  | TGG | 213 | 2   |
| CATCCATTAGCACAATTGAT  | 28409 | AGG | 213 | 2   |
| AACTAACAAAACAAATACTG  | 33695 | AGG | 213 | 62  |
| GCGATGTCAGCAGGTATCAG  | 24599 | AGG | 212 | 2   |
| GGAAGAAGCGAGTATCAATA  | 3735  | TGG | 212 | 18  |
| CTTTTTAATAAAAATTGGCAT | 27712 | AGG | 212 | 44  |
| GAATGGCGTGATTGGCTTAT  | 23345 | TGG | 212 | 67  |
| GCCAACCCTAACTACTTACA  | 30662 | AGG | 211 | 54  |
| TATAATTGCTTTTATATAGT  | 40003 | AGG | 211 | 87  |
| TAACGAAATAGTATTTGTTT  | 12907 | TGG | 210 | 15  |
| ATACTTTGCTGGTGTGCGACT | 15818 | GGG | 210 | 25  |
| AATTTTATTAAAAAGTCTAC  | 27736 | AGG | 210 | 29  |
| GGAGATTTATTGAACGCTGC  | 24776 | AGG | 210 | 50  |
| GTTCCAACTGCAAGCATAG   | 10866 | AGG | 209 | 52  |
| AAGTTGAAGATGTTGTTGTG  | 13978 | AGG | 209 | 57  |
| AACAACCTATTGAAAGATTA  | 24206 | CGG | 209 | 70  |
| GAGTTTTCCCCTTGTGGTTT  | 13934 | CGG | 208 | 21  |
| AACTTCAATTGCAGAACAAA  | 29258 | AGG | 207 | 110 |
| TCTAATTGTTCTCGAGTTGG  | 22994 | TGG | 205 | 47  |
| GTAGAACTTATGCAAAGTAC  | 11052 | AGG | 205 | 56  |
| GATGACATGAACGCTATAGA  | 26714 | CGG | 204 | 10  |
| ACCCTGACCATCCCGAGCAT  | 15544 | TGG | 203 | 20  |
| ATTAATAACCTAGTAAGGTT  | 6264  | AGG | 203 | 42  |
| CAACTGACAGCTAGATATTT  | 23282 | AGG | 203 | 52  |
| AAAGGCGAACCGGGACAACC  | 36791 | TGG | 202 | 13  |
| GGTTTTATTACAAAAGATGA  | 37500 | AGG | 202 | 30  |

|                       |       |     |     |    |
|-----------------------|-------|-----|-----|----|
| TTATTTCAACAAATGAATGG  | 6473  | TGG | 202 | 86 |
| AAAACGACTAATCTTGCAAG  | 29066 | AGG | 201 | 55 |
| AAAGGTAATAATGTAAGAGA  | 39424 | CGG | 201 | 56 |
| GATTCACCCACAACAATATA  | 21830 | TGG | 200 | 9  |
| AAGTAACTATCGGGTGTAG   | 16067 | AGG | 200 | 13 |
| TATAACAATTGCTTGTTGGT  | 12250 | CGG | 197 | 12 |
| GACTATTACTGTTACAAAGA  | 20508 | AGG | 197 | 47 |
| TTCTATGAACGTAATATCAA  | 15699 | CGG | 196 | 20 |
| CACAAAGTAGTCAGCGCGGT  | 26390 | AGG | 196 | 93 |
| AATGAATTTTTAAAACATTC  | 31819 | AGG | 195 | 38 |
| GGCTATTAGCGCTCTTAAAA  | 24460 | TGG | 195 | 50 |
| AAAGCGTAAAGGGTACAAC   | 17428 | TGG | 194 | 1  |
| CAAGATGGAATCAAGATTTT  | 7460  | AGG | 194 | 66 |
| CGCTCAGAACTCATAGATG   | 8501  | AGG | 193 | 10 |
| ATGTAGTTGAATTCTTTGAA  | 11981 | TGG | 193 | 29 |
| GCTTTGGAAATCTCTAATAT  | 23627 | TGG | 192 | 2  |
| AGCTCCTGCACAAGATGTAG  | 14492 | GGG | 191 | 9  |
| GTAAAGAACTTATTTACGA   | 37444 | AGG | 191 | 14 |
| GTATCGATGACTGATTCAGG  | 30926 | CGG | 191 | 38 |
| CTTGTTTCAGTAACGATGCT  | 35557 | TGG | 191 | 52 |
| GATGATTATAACGTAGATAG  | 31729 | AGG | 190 | 2  |
| AAAGTAAAAGTTAAGACGAT  | 13564 | TGG | 190 | 29 |
| TAGATTGGTTAACTCAATTG  | 25653 | TGG | 190 | 33 |
| TGAGGAAGAAGCCACGAATA  | 10815 | CGG | 190 | 37 |
| TTCTATAAATTTGCAGTATA  | 3908  | CGG | 190 | 65 |
| AGATAGTTTAAAAAAGCAA   | 28477 | TGG | 189 | 16 |
| CCAAATATCTGACCAATCTT  | 24949 | AGG | 189 | 17 |
| CTTAAATACTTAGCGATATT  | 38802 | AGG | 189 | 53 |
| GATAGATTGCCTACAAACGA  | 27325 | AGG | 188 | 25 |
| GGACGCAAAGCGCTTTTAA   | 30809 | AGG | 187 | 20 |
| GTTAACACCTCTTTGGCCGA  | 30860 | TGG | 187 | 36 |
| TGCAAGAGGTGGCGCAACAA  | 29080 | TGG | 187 | 37 |
| AATATGATTCTAGGCCATAA  | 29852 | CGG | 186 | 2  |
| TATTGGGCAGGCGTACCGAT  | 29216 | AGG | 186 | 17 |
| ACAGTTAAGAGTCAGTGCTT  | 34322 | CGG | 186 | 37 |
| GCAAGTATATATTATGATGA  | 13718 | CGG | 186 | 48 |
| ACAGAATGAACTATGAAACA  | 11352 | GGG | 186 | 63 |
| AGAAAGCAAGTGCATGGGAT  | 11502 | AGG | 186 | 68 |
| AAAAAGATTATGGCTTATAT  | 38933 | TGG | 185 | 38 |
| TTATTGTTAATTGTTATTGA  | 4510  | AGG | 185 | 57 |
| GGGAAACAATTCAACCCAGA  | 38236 | TGG | 184 | 24 |
| AAGATTTTATTAAGCAAGA   | 7445  | TGG | 184 | 30 |
| CTTAATATTCGACGATAGCG  | 8572  | GGG | 182 | 88 |
| GGTAGAATCTTTAGTATTGT  | 21212 | AGG | 181 | 1  |
| CGATTC AAGGTGTAGTAGAT | 25638 | TGG | 181 | 11 |

|                       |       |     |     |    |
|-----------------------|-------|-----|-----|----|
| CGTGGATAAAAAGTTGATGAG | 5812  | AGG | 181 | 15 |
| CGTATTGATAATACAGGTTA  | 29903 | TGG | 180 | 3  |
| TCCAATAACCGGCGTTTTG   | 31213 | CGG | 180 | 24 |
| CCACTAGTTGAAGTGTTGTA  | 19924 | AGG | 179 | 48 |
| CCAATGTACTTGATACGATT  | 25950 | TGG | 178 | 21 |
| ACGACTAATCTTGCAAGAGG  | 29069 | TGG | 178 | 36 |
| AATGGTTTTGACAATTCATTA | 38216 | GGG | 178 | 42 |
| ATATGAATGAACATGAATTA  | 13195 | AGG | 177 | 9  |
| ATCGGTGTTATCGGTATTTT  | 25310 | AGG | 177 | 25 |
| TAGCTTAGGTAAAGGTTTAG  | 26476 | CGG | 177 | 26 |
| GTAGTTGACTCAGACGGCAA  | 33181 | CGG | 177 | 38 |
| CACTAAGTCGTTATATCCTA  | 28601 | TGG | 176 | 4  |
| ATAGATACTTCAGATAAGAA  | 24634 | TGG | 176 | 23 |
| TCGTCCCACACTCGATATTT  | 10901 | CGG | 176 | 25 |
| TCGTAATTATCTATTTCTAT  | 21986 | AGG | 176 | 35 |
| TCCTTAGTTGATAGATTTTT  | 19309 | AGG | 176 | 44 |
| ATTAATATAGATAATTATCG  | 34463 | GGG | 175 | 28 |
| ATAGCTTCTGGGCGTGCTTC  | 34282 | TGG | 175 | 29 |
| ATTATCGGGGCAGTCAATGT  | 34476 | TGG | 175 | 29 |
| TAGCGCGTTGTAAAGCTCTT  | 23733 | TGG | 175 | 58 |
| GGTGGCGTTTTAGGTTTAGT  | 24392 | TGG | 174 | 69 |
| TCCACCACTTCACTAGCTGT  | 34396 | AGG | 173 | 33 |
| AGAGATATAGAACTTCACTG  | 5385  | GGG | 173 | 35 |
| GCTTAGTACAAGCTTCTAAG  | 23427 | AGG | 173 | 59 |
| TAAATGCCTCTGCAATTAG   | 19861 | AGG | 172 | 9  |
| TATTTTAGGTGGCGTATTTT  | 25324 | GGG | 172 | 16 |
| CAACTAATTCAAGAATTACA  | 39452 | GGG | 172 | 77 |
| TAAAGGTAGACCCTAATATT  | 35325 | TGG | 171 | 2  |
| TATCAAAAGAGTTTCTTAAA  | 19824 | TGG | 171 | 29 |
| TTTTTCAATATCAACTATGA  | 10484 | AGG | 171 | 33 |
| AACGGTAAAGGTTGACTAA   | 38530 | TGG | 171 | 34 |
| ACCTAGATTACATTTGTTTA  | 36406 | TGG | 171 | 35 |
| ATAAACGAATTTGGCAAAGA  | 11552 | TGG | 171 | 47 |
| CATAAGATGACAGAGGCGAA  | 32734 | TGG | 171 | 63 |
| AGAAAAACAAAGATTTGTTT  | 6142  | CGG | 170 | 42 |
| GAGCGTAATAAACGTGCAGA  | 22419 | CGG | 169 | 41 |
| GTTGCAAAAAGAGTACGTGG  | 9536  | TGG | 168 | 37 |
| TAGAAATGTAAATGTAGAGG  | 9418  | TGG | 168 | 66 |
| CCTAGCTCTATTTCTATTTG  | 3682  | TGG | 166 | 21 |
| GAGCTTTCCTTACGTTGCTT  | 23643 | TGG | 166 | 22 |
| TCAACTCGCATGATTATTTT  | 9209  | TGG | 166 | 30 |
| TAGAAGAATCAACAGCAAAA  | 37568 | TGG | 166 | 53 |
| GATACTCATCGTCATTTAGA  | 18363 | TGG | 165 | 13 |
| AACTAATTCAAGAATTACAG  | 39453 | GGG | 165 | 32 |
| TACACAGTAGCTAATGTAA   | 39406 | AGG | 164 | 3  |

|                       |       |     |     |    |
|-----------------------|-------|-----|-----|----|
| TGAATCATCACATTTATTGG  | 11327 | AGG | 164 | 20 |
| CAGAATGAACTATGAAACAG  | 11353 | GGG | 164 | 39 |
| TGTGAAGCATAAGCAATTTT  | 26970 | AGG | 163 | 26 |
| TGCATTACTGCATTTGTATA  | 30073 | TGG | 163 | 27 |
| TGGAGAAGAAAGCAAGTGCA  | 11496 | TGG | 163 | 39 |
| TAAAGTTACATTACAGCCCC  | 6035  | TGG | 163 | 45 |
| TCTACCGCTTCTTTACCTAT  | 29095 | TGG | 163 | 53 |
| AAGTTTTATAACGGCTCAGC  | 4683  | AGG | 162 | 16 |
| TTGAAATGAGGTGCATACAT  | 34364 | GGG | 162 | 42 |
| TTTAATCATGAAAGACATTA  | 19621 | TGG | 161 | 1  |
| ACACATTGTACCGAATTAGA  | 36096 | TGG | 161 | 30 |
| TAAAACAATTAAGGATTTA   | 21073 | TGG | 161 | 36 |
| TTATTAATAACTATTTGGA   | 39694 | TGG | 161 | 47 |
| AGCGTTGGCAATAAAGCTAA  | 38653 | AGG | 161 | 62 |
| ACCAATGCTCGGGATGGTCA  | 15529 | GGG | 160 | 25 |
| TCATAAGTGATACCTTGCAT  | 30583 | AGG | 160 | 27 |
| ATCGAAAGGAGGTTAGCCTT  | 23593 | TGG | 159 | 1  |
| AGCATATCTAAGTGATATTA  | 30979 | CGG | 159 | 7  |
| TGTTTTGTTAGTTTTAGTT   | 33669 | CGG | 159 | 43 |
| GCATTCCTCGCTAGTTTAGA  | 14879 | TGG | 159 | 44 |
| AGCAACTAACTTTATTTTAG  | 10288 | AGG | 158 | 25 |
| ATTGAACTTGATGAAGCAGT  | 11805 | AGG | 157 | 13 |
| AGTTGGGATCAATGTTGAGG  | 13009 | AGG | 157 | 20 |
| GTCGCAGGTCTTGGAGTTGT  | 24425 | TGG | 157 | 23 |
| AAAATTATTACAAACAGAAT  | 5429  | TGG | 156 | 25 |
| GATTTAGCTGAAATAGTACG  | 22260 | AGG | 156 | 38 |
| TTAGTAAACCTGTCTATATC  | 22046 | AGG | 154 | 8  |
| AACTCTTCTTTAAATTTAAT  | 33428 | AGG | 154 | 14 |
| GCTGGAATACTGCGATTATT  | 13312 | CGG | 154 | 16 |
| TTAATTTAACACAAAGTAGG  | 33919 | TGG | 153 | 1  |
| AGAAGCGAAAGAGAAGTACG  | 12561 | AGG | 153 | 11 |
| GATTTTAGGATATAGCTTCT  | 34271 | GGG | 153 | 12 |
| TTCCCCTTAGCATCAAATAA  | 20128 | TGG | 153 | 17 |
| AGATTGGTTAACTCAATTGT  | 25654 | GGG | 153 | 19 |
| ATACAAAAAAGAGCTGAAAA  | 7129  | CGG | 153 | 29 |
| TATGAATGAACATGAATTAA  | 13196 | GGG | 153 | 39 |
| CGAAAAGGTGGTAATTGATA  | 18612 | TGG | 152 | 10 |
| TGTCCTAATACTTGTAAATAT | 25693 | AGG | 152 | 26 |
| CTACAAACGAAGGTGATAAG  | 27335 | AGG | 151 | 17 |
| ATTCTAGGCCATAACGGCGA  | 29858 | CGG | 151 | 21 |
| CACAACTATTCTATTTTGT   | 33075 | TGG | 150 | 24 |
| TGTGGATTCTCGGTTTGATA  | 34169 | GGG | 150 | 30 |
| GCCGTTATTACAAGGGGCTT  | 23075 | TGG | 148 | 12 |
| TAAGCGCAGTTAACACATCT  | 32351 | AGG | 148 | 17 |
| GTTTACATTCAATGACAGGT  | 29652 | CGG | 147 | 1  |

|                        |       |     |     |    |
|------------------------|-------|-----|-----|----|
| AAAGGTGATAAAGGCGAACC   | 36782 | GGG | 147 | 15 |
| TCAACTTTAGTAATCCTTCA   | 37736 | GGG | 146 | 17 |
| GACTTGAATCGATTCCAGCC   | 27630 | TGG | 146 | 40 |
| GTACTIONACCAGAAACAGCAC | 31133 | AGG | 146 | 53 |
| ACTAGATGCTTTCACTAAAA   | 29968 | AGG | 145 | 10 |
| ACTGGGTTAATTCTAATAGT   | 34737 | TGG | 145 | 16 |
| AAAACAAACAACCTTAATAGG  | 2527  | AGG | 145 | 26 |
| TAATGTTTGATTACCAAAA    | 33944 | CGG | 145 | 32 |
| TTAACAATTGGTAATGTGCC   | 22329 | TGG | 145 | 37 |
| CAAGGTATCACTTATGATGC   | 30605 | AGG | 144 | 6  |
| ATTGAAAATGATTTAGTTAG   | 31918 | TGG | 144 | 8  |
| GTCACCTGATAACTTTTATT   | 37593 | AGG | 144 | 11 |
| TTCAACACCAGTAGCAACGA   | 5229  | CGG | 144 | 41 |
| AAAAAGCTGAAGAAAATAAC   | 5074  | GGG | 144 | 51 |
| ATAGAGTTAACTAACAATA    | 15306 | TGG | 144 | 54 |
| ATTCATTTTAAAAGGTCATA   | 3399  | TGG | 143 | 4  |
| TTACTAGCAATGTATGAGCT   | 13680 | AGG | 143 | 24 |
| TGACGTTAATCTGGAAAGAT   | 10686 | GGG | 143 | 32 |
| AGTTATTCAAAAATCACGAA   | 1154  | AGG | 143 | 41 |
| TTGGCGACTCTGTAGCTAGA   | 28992 | GGG | 143 | 42 |
| AACTTTGGTACTGGTGGCGT   | 31469 | TGG | 142 | 9  |
| AAAACGGATTATCGGCAAAC   | 7211  | GGG | 142 | 12 |
| CGTATTGTTGTACCACTCAT   | 29338 | AGG | 142 | 27 |
| GTTTTTTTGGGGCAAAAAAA   | 40235 | GGG | 142 | 42 |
| CTGAGAATTTTTCAGCTTTT   | 22846 | CGG | 141 | 1  |
| TTTGTAACAACCTGATATTAA  | 21    | AGG | 141 | 11 |
| GAAAAAGAAGATTTTGA AAC  | 16454 | TGG | 141 | 15 |
| GTTAAATGGAATACAGCAGA   | 22533 | AGG | 140 | 1  |
| AACGATAAAAACGAAGTTAT   | 33366 | CGG | 140 | 5  |
| TCGCCATTTTCATATAAATAA  | 17971 | AGG | 140 | 22 |
| ATAAGTGCTAGTGCGTATAA   | 11667 | CGG | 140 | 29 |
| CAACTGCCATTGTGATGAGG   | 2565  | AGG | 140 | 36 |
| TTCTTTATGATAATATGGAT   | 16126 | AGG | 140 | 37 |
| ACGGGCATATCGTACCAGAT   | 10183 | TGG | 140 | 47 |
| CGTGGTGTTTGGTTATTGTC   | 35273 | AGG | 140 | 48 |
| GAGCGCCTTTGAATCGTTTT   | 8749  | AGG | 138 | 22 |
| AAAACTTAAAAATATGGAT    | 13274 | TGG | 138 | 39 |
| ATTAACAATAAAAACTTTTA   | 11599 | TGG | 138 | 47 |
| CGTATCGATCTAAAAGCACA   | 36377 | TGG | 137 | 11 |
| CCAGCTACCAAACCACCTAT   | 39267 | AGG | 136 | 22 |
| AATATTGCCTAAGCATATTG   | 16324 | AGG | 136 | 25 |
| ATAAGAAACATCAAATCAAT   | 28964 | TGG | 136 | 39 |
| TTGAACTTGATGAAGCAGTA   | 11806 | GGG | 135 | 5  |
| GTTATTTTTTGCCTTTTTTT   | 40223 | GGG | 135 | 8  |
| TATGAATCAGATAGAGGAAC   | 31621 | TGG | 135 | 12 |

|                       |       |     |     |    |
|-----------------------|-------|-----|-----|----|
| ATCAACTTTAGTAATCCTTC  | 37735 | AGG | 134 | 35 |
| TTTTTCGGGAATTTTCATTTT | 13034 | AGG | 134 | 39 |
| AACCACAATCCTAAATTAAT  | 40187 | AGG | 134 | 43 |
| TACTATGCAACAAGAGTGC   | 32820 | CGG | 133 | 1  |
| TCAATATCGCAAATGTTGAA  | 36960 | GGG | 133 | 25 |
| TTGATACGAATGGTGATGTT  | 16731 | AGG | 133 | 30 |
| TGTACGTAGCGGTATAATGA  | 37641 | GGG | 133 | 30 |
| AATGGCGCTGACCTTGTTAA  | 32239 | AGG | 133 | 34 |
| TTTTCAATATCAACTATGAA  | 10483 | GGG | 133 | 36 |
| GAAATTGTTGATACACGTGT  | 16538 | TGG | 132 | 33 |
| ACTAAAAATTGATGTGCAGA  | 31426 | CGG | 132 | 41 |
| ATACGCACTAGCACTTATAA  | 11646 | CGG | 132 | 64 |
| GCATTTATATGTCGATAGAG  | 35122 | AGG | 131 | 8  |
| AAGAGTCAGTGCTTCGGCAC  | 34328 | TGG | 131 | 29 |
| TATAAGTAATATTTTTCTTT  | 8609  | CGG | 131 | 44 |
| GCCAATTGTCAGGACGACTT  | 6992  | AGG | 130 | 3  |
| GGAGCAGTTAAACGTTCTTT  | 24122 | CGG | 130 | 25 |
| GGTAATAGAATAAGTAGTTT  | 39601 | TGG | 130 | 29 |
| TAATAGTTGGACAGGTTCTC  | 34750 | CGG | 129 | 27 |
| CAGTCGTGTTGCTTGGAGTG  | 26125 | TGG | 129 | 45 |
| CAATGAATGTTAAGCGAATA  | 35703 | TGG | 128 | 4  |
| TCAACGGTATTGTTGACGG   | 33010 | TGG | 128 | 25 |
| CCTTATTAACGCAAGGGTG   | 2350  | TGG | 128 | 42 |
| TTATCAGATTTAAAAATCGT  | 31277 | TGG | 127 | 30 |
| AGCTTTTAGGAAAGCGAGCA  | 29512 | TGG | 127 | 37 |
| CGGATTAGTACCTGCAATAA  | 24340 | TGG | 126 | 13 |
| CATATCGCCTATATACACAG  | 13359 | TGG | 125 | 24 |
| ATACCTTGTTACGCGGTA    | 17095 | TGG | 124 | 1  |
| ATTTATTAACCTTACAAAA   | 5009  | AGG | 124 | 13 |
| AATTCTTTGAATATTATCTG  | 12222 | TGG | 124 | 16 |
| TCAGTTGTATGAAAATATAA  | 12618 | GGG | 124 | 18 |
| AAAATCTCATACATGGGGCT  | 35650 | GGG | 124 | 21 |
| CGCACGATATAGAAGTAATA  | 26777 | AGG | 124 | 24 |
| ATGGATCCTATTTTAGGTAA  | 6795  | AGG | 124 | 42 |
| TTGGTCGTCGAGTTGTAGCT  | 1051  | CGG | 123 | 9  |
| TTCTTTACTTCGTATAAGAT  | 13599 | CGG | 123 | 11 |
| TAAACCTGAACGATTAAGGA  | 16256 | GGG | 123 | 11 |
| AGGCCTTTGAAGAATATGAG  | 14796 | TGG | 123 | 17 |
| CGTGGACGAGGCGAGCCCAT  | 8876  | AGG | 123 | 18 |
| TATCACAAAAGGTTCTGAAT  | 26179 | GGG | 123 | 18 |
| GAATCAGTCATCGATACTTG  | 30904 | AGG | 123 | 35 |
| TTGTTAGGTACACCAAACAA  | 16954 | TGG | 123 | 38 |
| AAATGTTATACCTTTATTAA  | 28325 | AGG | 122 | 4  |
| TACTAAGCATGGCACGATA   | 22078 | CGG | 122 | 8  |
| CCTATAGGTGGTTTGGTAGC  | 39283 | TGG | 122 | 18 |

|                        |           |     |    |
|------------------------|-----------|-----|----|
| CACTCCATTTCTTGAACATT   | 9759 TGG  | 122 | 26 |
| AATCATAAAGCGTATATACA   | 8967 AGG  | 122 | 34 |
| AGTGCTAACAATTCATGTTC   | 23296 AGG | 121 | 31 |
| CGATTCTATCGTTATTCATC   | 34592 TGG | 121 | 41 |
| TTAAAGTGATTTAAAACTG    | 6190 AGG  | 120 | 11 |
| AAAATAAAAAGATGCAACAA   | 400 TGG   | 120 | 16 |
| TAACTTCTCAATTTAGAGCA   | 25068 TGG | 120 | 31 |
| TCCAAGTGATTATAAGTGAA   | 26814 AGG | 119 | 12 |
| GATGGTGAAAGAGTTAAATT   | 11570 TGG | 119 | 14 |
| CACAAATGATTTAGGGTAGG   | 38158 TGG | 119 | 29 |
| ATCGGATTCGTTAATACTGG   | 33384 CGG | 118 | 4  |
| TCACAACGTCATTGTGATG    | 2568 AGG  | 118 | 7  |
| TAATAGAACTATCAAGTAAA   | 556 AGG   | 118 | 13 |
| AACAATTTATTTGAGTATGA   | 21191 GGG | 118 | 14 |
| ATAGGGGTAACACTATTGGACC | 30827 TGG | 118 | 15 |
| AAGGTAATTCACAACAAAT    | 32258 TGG | 118 | 26 |
| AGCAGTATTTTTCATAGAGG   | 21694 TGG | 118 | 35 |
| GGATTAATATAGATAATTAT   | 34461 CGG | 117 | 25 |
| CAGGCGCCCAAGCTATTTAT   | 18435 TGG | 116 | 1  |
| GACTTTTCATCTTTTGCCTC   | 33857 TGG | 116 | 9  |
| TAAAGACGATAGAGAGAGAA   | 16363 TGG | 116 | 25 |
| CTTTTATATGAGCAAGAGCT   | 8793 AGG  | 115 | 10 |
| ACAATAACAGAAGCTTGGAA   | 25592 CGG | 115 | 14 |
| CTGATGTTTGTGTCAATAAT   | 31578 TGG | 115 | 24 |
| TTCCAATAGAAATAGTGTGA   | 20982 GGG | 115 | 34 |
| ATTACAGTTTTTACGACTAA   | 29598 AGG | 114 | 17 |
| AAGATAACTTGCCGAAAGAG   | 22561 TGG | 114 | 42 |
| GCAAACGTCATTGCATAATC   | 35971 AGG | 114 | 54 |
| TTAAGCGTTGCGAACGCTTC   | 20401 TGG | 113 | 8  |
| AAAACCAACGTTTAATGATT   | 4198 GGG  | 113 | 16 |
| GTTAATTCTAATAGTTGGAC   | 34742 AGG | 113 | 31 |
| ATTGGAAGTATCAAAAAAGT   | 21014 AGG | 113 | 42 |
| GTGTGAGGGAATTCGTCGTA   | 20968 TGG | 113 | 49 |
| TATAAACAAATCGGCTTAAA   | 36179 AGG | 112 | 11 |
| CTATCAATAAATTGTCCGTT   | 30181 GGG | 112 | 25 |
| CTAAACCTGAACGATTAAGG   | 16255 AGG | 112 | 54 |
| TTATCTAAAGGGACTTAAGA   | 19002 CGG | 111 | 8  |
| ATGATGTCAGGTACAGAAAA   | 2060 AGG  | 111 | 35 |
| AAAAATGATGGTGTTGACTT   | 36278 AGG | 110 | 4  |
| AAGGAAGTTGATTTAAAAGC   | 27532 CGG | 110 | 9  |
| AAATAAATACCATTTATTAC   | 830 CGG   | 110 | 16 |
| ATGCTTTTAGTTCTTTAGAT   | 28776 GGG | 110 | 17 |
| TTAACGATAGAAAAAGATTA   | 12956 TGG | 110 | 25 |
| AGCCCAATTTTGGAAAGCTA   | 24866 TGG | 108 | 9  |
| TTAAATCAAGTGGGTGTGT    | 18411 TGG | 108 | 16 |

|                       |       |     |     |    |
|-----------------------|-------|-----|-----|----|
| GACGCAAAGCGCTTTTAATA  | 30810 | GGG | 108 | 29 |
| ATTCATGGTAAGCCTATAGG  | 39271 | TGG | 107 | 6  |
| CAACGTTGCCGAAACCACAA  | 13942 | GGG | 107 | 13 |
| TTGATGACCTTAACAATTCT  | 28002 | AGG | 107 | 13 |
| TTGAACAAAGGTTATATAGT  | 12992 | TGG | 107 | 17 |
| AATGCCGGAGCGGAATTAAT  | 26336 | CGG | 107 | 18 |
| ATAAAAATGAGCAAATTAAG  | 33790 | TGG | 107 | 24 |
| ACCGAATATGGCCAAAAGCG  | 23165 | AGG | 107 | 31 |
| GTCAAGCGCCACAGCCATTT  | 21637 | TGG | 106 | 2  |
| GTGTCTGTTGATGACGTTAA  | 19024 | AGG | 106 | 19 |
| AACATCTCAAGAAGGGAAAT  | 38035 | GGG | 105 | 6  |
| ATCTATTAGTTTACATAGAA  | 22678 | TGG | 105 | 24 |
| ACAATGGCAACAGTTCCAAT  | 29096 | AGG | 105 | 26 |
| GTAGCTCCTGCACAAGATGT  | 14490 | AGG | 105 | 44 |
| TGAAGCAGTAGGGATTATGA  | 11816 | CGG | 104 | 8  |
| TCATAGAGGGCAAGAGCCAA  | 14619 | CGG | 104 | 11 |
| GATTTTCTAAAGACTTTAA   | 31343 | AGG | 104 | 15 |
| CTCTAAGAGATATCTGTATC  | 10109 | AGG | 103 | 3  |
| TCTATGCTTGCAAGTTGGAA  | 10848 | CGG | 103 | 7  |
| ATACTGCTTGACTATCGATA  | 22021 | CGG | 103 | 11 |
| AGGTAGCGTTGAAAGTTATG  | 32850 | AGG | 103 | 20 |
| TTTGATACAGCGGAAGAGCT  | 10224 | CGG | 103 | 21 |
| AATTGGGCTAATAGTGTGGC  | 24896 | TGG | 103 | 47 |
| CATTGATACCGTCGCCGTTA  | 29850 | TGG | 102 | 18 |
| CTGAATAGGAGGAGATATGA  | 20445 | TGG | 102 | 24 |
| AAGTTATGAGGGTTATTTAT  | 32862 | CGG | 102 | 25 |
| GCGCGCTCTAGATTTAACTT  | 8981  | AGG | 101 | 14 |
| CAGCTTTTTACCGCAAAGT   | 38406 | TGG | 101 | 18 |
| GCACCAGCAAGTATATATTG  | 15236 | AGG | 100 | 2  |
| GGACACACCGCAATAGTAGT  | 34676 | AGG | 100 | 2  |
| AACTATCATTAAAAGTTAAA  | 22519 | TGG | 100 | 10 |
| AAGCGTTTAGAGATGCAGGT  | 31065 | TGG | 100 | 24 |
| GCGCACGCTTTCTTAGAAAG  | 35891 | TGG | 99  | 12 |
| AATGGTTGAAGATGGAACAT  | 24478 | TGG | 99  | 13 |
| CTGAATGGGTTTCTAACATT  | 26193 | TGG | 99  | 18 |
| TGGAGTTTTAAAGGTGATGA  | 21594 | CGG | 99  | 21 |
| GACGGTGCATATTGTATTA   | 39505 | TGG | 99  | 35 |
| ATGTATTACGATCTAGAAAC  | 30788 | AGG | 98  | 3  |
| TATTAGTAGTACGCCCTTTT  | 7244  | CGG | 98  | 8  |
| CTAACACATCACCTATTTT   | 28564 | AGG | 98  | 8  |
| ACGCATGTAATGGTCATGTG  | 9148  | TGG | 97  | 22 |
| TCAAGTGATTTAGGAATATC  | 37684 | AGG | 97  | 24 |
| AAACGACGTATCGATATTGG  | 30716 | CGG | 97  | 37 |
| TTGATATCAAACAGCTGAA   | 7505  | TGG | 96  | 1  |
| ACTTCATTTCGTAAGTGGACA | 26444 | CGG | 96  | 7  |



|                       |       |     |    |    |
|-----------------------|-------|-----|----|----|
| TCTATTGTGTTAATAGGACG  | 15858 | AGG | 96 | 9  |
| AAAGGAAAAGGAACGCTCGA  | 35807 | CGG | 96 | 12 |
| AAAGAATGGTCATGAGGATA  | 9990  | TGG | 96 | 27 |
| CCTACTATTATGCAGTTAAT  | 25154 | CGG | 95 | 2  |
| AAAGGAACGCTCGACGGACA  | 35813 | AGG | 95 | 10 |
| TCCGAAAATGGCATTTCGGT  | 7173  | TGG | 95 | 17 |
| TGCTATCAAATGCTTAATTT  | 35741 | AGG | 95 | 18 |
| CCTAAGATTGGTCAGATATT  | 24965 | TGG | 94 | 1  |
| TGCGCCGACACTTATAACAC  | 21477 | TGG | 94 | 8  |
| ATTTTGCTACATTAATTATA  | 39661 | GGG | 94 | 19 |
| AAACTCATAGATGAGGCACA  | 8508  | GGG | 94 | 43 |
| CCAAAATTGGGCTAATAGTG  | 24892 | TGG | 93 | 3  |
| TCCATAAACAAATGTAATCT  | 36391 | AGG | 93 | 10 |
| AAACGAAGGAGTGTATTTAA  | 22130 | TGG | 93 | 13 |
| AGTCAAAGCTAAAGGGCATA  | 8100  | CGG | 92 | 26 |
| AGGCTCAATAAAATGTTGAA  | 5832  | AGG | 92 | 29 |
| TGGGAGAAATATAAGCGAAA  | 18597 | AGG | 92 | 35 |
| CACTGGATAGACAAATGTCT  | 35616 | AGG | 92 | 38 |
| GGTTTACCATCATACAAGGA  | 40368 | TGG | 92 | 46 |
| ACCACTATCTTATACTGGAG  | 20182 | CGG | 91 | 17 |
| CCTGGTGCAAAAGGTGAAGC  | 36809 | AGG | 91 | 22 |
| TTTAAGCTATTCATTTTAAA  | 3391  | AGG | 90 | 8  |
| CAACACAAAGAAGTACATCA  | 13390 | AGG | 90 | 13 |
| TATGAAACAGGGGTCCAAC   | 11363 | AGG | 89 | 1  |
| TTGAAACTGGTGGAATGTA   | 16467 | AGG | 89 | 4  |
| CCCATGTATGAGATTTTTTC  | 35628 | GGG | 89 | 4  |
| AGGCATTCTTTACACAAAAC  | 31856 | GGG | 89 | 7  |
| TGATTGGTTACACGGTTATT  | 29200 | GGG | 89 | 15 |
| AGCTAGTGAAGTGGTGGAGT  | 34417 | GGG | 89 | 20 |
| ATTATGCTTGTAGCCGGTCA  | 38728 | TGG | 89 | 27 |
| ACTCTCAATGAGATTAATTT  | 34024 | AGG | 89 | 30 |
| ATTTTATTAATAAAGTCTACA | 27737 | GGG | 88 | 9  |
| AACTTCGCTAATGGTAGATA  | 35924 | CGG | 88 | 17 |
| AAAGTAATTGCTACAGACTT  | 26510 | TGG | 88 | 18 |
| AGCGTCGTTAGCGCATGAAG  | 15461 | AGG | 88 | 19 |
| GGATTCAATGTTATATTTAA  | 22920 | CGG | 88 | 36 |
| GCAAAGATCATTAAACAAAA  | 2276  | CGG | 87 | 5  |
| AAAGATATTGTAAGTAGATA  | 15957 | TGG | 87 | 6  |
| TATGCACTTTTCGGACTGTT  | 18886 | AGG | 87 | 25 |
| CCACACTATTAGCCCAATTT  | 24876 | TGG | 87 | 38 |
| TGGGTGTGCTTCGAATAGTT  | 25256 | TGG | 86 | 1  |
| GTTGGTGGTACTATGATTTT  | 2793  | TGG | 86 | 22 |
| TACGGATATCACTGTTCCCTA | 25817 | TGG | 86 | 23 |
| TCCGCTCCAGTATAAGATAG  | 20167 | TGG | 85 | 7  |
| TTAAGAACTCTTTTGATAA   | 19804 | CGG | 85 | 12 |

|                       |       |     |    |    |
|-----------------------|-------|-----|----|----|
| TCACTTACTACCTGCCTATA  | 14405 | TGG | 85 | 25 |
| GCCAATTATTACATTAAGC   | 28262 | TGG | 85 | 26 |
| GACGGTGGCGCAAATGGTGT  | 33025 | AGG | 85 | 26 |
| AGGGGTCCAAGTGGTGTAA   | 11371 | TGG | 85 | 34 |
| AACACAAAGAAGTACATCAA  | 13391 | GGG | 84 | 1  |
| CTAATTTTGTAGCAGTATT   | 26082 | TGG | 84 | 1  |
| CATGCCATAAGGTGCGTTTA  | 9560  | AGG | 84 | 2  |
| TATTATGTATTTGAGGAGA   | 16895 | AGG | 84 | 7  |
| AACAATGATTTTATGAAAGA  | 20736 | TGG | 84 | 8  |
| TAAATACTTTCACATCATT   | 38497 | TGG | 84 | 10 |
| GAGTTTATTCGAGGGAAAGG  | 31498 | TGG | 84 | 17 |
| AAAAAGAAAGTTTTAACTTA  | 927   | AGG | 84 | 20 |
| TAAACAACTAGTTGATGAT   | 21790 | AGG | 84 | 21 |
| ACCGTTGATTTATGTTTATT  | 32979 | AGG | 84 | 41 |
| ATCAACGGTATGTGGGTGTC  | 15714 | TGG | 83 | 1  |
| TAAATCAAGTGGGTGTGTT   | 18412 | GGG | 83 | 1  |
| TCACGTTCAAATAATGATAC  | 20329 | TGG | 83 | 11 |
| GTTAACTTAAATAATGCGCA  | 32770 | AGG | 83 | 12 |
| ACAGCAATAGAGTACGTACA  | 7990  | AGG | 83 | 16 |
| GTTGGCGCATTCTCTGTCGC  | 24410 | AGG | 83 | 20 |
| TCCTTAATATTCGACGATAG  | 8574  | CGG | 83 | 22 |
| TTATAGCGTTGACCAAACT   | 34720 | GGG | 82 | 21 |
| TTTATAGCGTTGACCAAAAC  | 34719 | TGG | 81 | 2  |
| GTTTACACCAATAAATAGCT  | 18426 | TGG | 81 | 5  |
| GATATGAAAATGTGGATTCT  | 34159 | CGG | 81 | 5  |
| TATCAATTCATTTTCATGTT  | 9470  | CGG | 81 | 13 |
| TTATTGAAGGCGCATCAAAA  | 6761  | GGG | 81 | 17 |
| AAAGGTGCGAAAGGTGATAA  | 36773 | AGG | 81 | 45 |
| TCAATGGACTTTACATTTGA  | 19452 | AGG | 80 | 4  |
| ACATGTCTTGTCACAGTTTC  | 38559 | AGG | 80 | 20 |
| CTATTTTAGGGTTAGCTTCT  | 28551 | GGG | 80 | 28 |
| TTGTATTCTAAATTAATAGC  | 39244 | CGG | 79 | 9  |
| AAAAGCTGAAGAAAATAACG  | 5075  | GGG | 79 | 12 |
| AAACGTTCTTTCGGAAGAAT  | 24131 | TGG | 79 | 13 |
| TCCTCGCTTTTGCCATATT   | 23150 | CGG | 79 | 25 |
| ACCACAGATCCTATTAATTT  | 40194 | AGG | 79 | 25 |
| AGAACTGGAGAAATAACTTA  | 30344 | TGG | 78 | 8  |
| TTGCCAACGCTTAAGTTGTT  | 38625 | AGG | 78 | 14 |
| AAGCCTGTAACACTTACATA  | 34774 | AGG | 78 | 15 |
| ATAAGAAAAACAACGGAGCA  | 31197 | TGG | 78 | 16 |
| TTCAATGTTTGGTACAAGT   | 26037 | TGG | 77 | 3  |
| ATGTGGATTCTCGGTTTATG  | 34168 | AGG | 76 | 1  |
| GGTTTTTCGTCTGATGGAGT  | 35536 | AGG | 76 | 12 |
| TAGATATAAAGAGTCTATTA  | 15656 | AGG | 76 | 15 |
| ATAATTTTGTAAATATTCTTA | 31242 | GGG | 76 | 18 |

|                       |       |     |    |    |
|-----------------------|-------|-----|----|----|
| AGAAGTAAAATCGAATACAC  | 31384 | CGG | 76 | 18 |
| AAAGAAATCGTTAGCACTAA  | 20218 | TGG | 76 | 20 |
| TCCTAATGAACATAAATCAA  | 32994 | CGG | 75 | 3  |
| CTCTACCTTATTGATTTAAA  | 20927 | CGG | 75 | 7  |
| GTCATTGACATTAACGAAGG  | 3983  | TGG | 75 | 9  |
| AGTTTCTATGAATCAGATAG  | 31615 | AGG | 75 | 9  |
| CATTTCTTTGTCCTCGCTTT  | 23160 | TGG | 75 | 11 |
| GCGAGTACGTTTGACGCAAT  | 27845 | AGG | 75 | 11 |
| ACGCTTGTGGAAAAGCTAAA  | 40280 | AGG | 75 | 12 |
| ATAATTATGGATCCTATTTT  | 6801  | AGG | 75 | 13 |
| GAACGGGTTAACTCCTGGAA  | 9514  | TGG | 75 | 16 |
| ATTGTATTAATGGTTATAGA  | 39515 | TGG | 75 | 16 |
| TAACAAAACAAATACTGAGG  | 33698 | GGG | 75 | 25 |
| CAACCTACTCATGTCGAAAA  | 7726  | AGG | 74 | 9  |
| GACAAGGAAGATGTCTCCTG  | 40056 | TGG | 74 | 13 |
| GTTGTAGCTTTTCTAGCTTT  | 1646  | AGG | 74 | 15 |
| TCTAGTAATTTACTAGCTAT  | 25204 | AGG | 74 | 33 |
| CGTTTTAGCAATATGATTCT  | 29843 | AGG | 73 | 8  |
| AACCTGGAGACATCGCAGTT  | 34626 | TGG | 73 | 10 |
| AAACTTGGGAECTTGTCTTT  | 6719  | GGG | 73 | 12 |
| GAGGCCATGTATCTGACTGT  | 40047 | TGG | 73 | 14 |
| TTAAGTGATGAGGAACTTCG  | 33570 | CGG | 73 | 23 |
| ATATTTAAGATGGAAGTTGA  | 20685 | CGG | 72 | 10 |
| AAAATCATTAATTTTCTAC   | 30415 | CGG | 72 | 25 |
| ATACTCCACTAATGTAATCA  | 20875 | GGG | 71 | 1  |
| TGGCGACTTCTCAGGTGCTT  | 25906 | GGG | 71 | 7  |
| GTACGTTTTCCAATATAGAAC | 30329 | TGG | 71 | 7  |
| ATCTTCGCGCAACAGGTCAA  | 24275 | AGG | 71 | 11 |
| ATTAAACTTTTTATGTGTG   | 33762 | GGG | 71 | 12 |
| GCTCAAATTATCGGTGTTAT  | 25301 | CGG | 71 | 14 |
| TACAACATCGTCGATAATAA  | 36440 | GGG | 71 | 14 |
| AATTACGACTTGATTAAGCA  | 35369 | AGG | 71 | 18 |
| AAATTTACTTACTTAGCAAA  | 19700 | AGG | 70 | 5  |
| GCAGTTTGGCACCTGGCAA   | 34640 | CGG | 70 | 6  |
| AAAACATCCAGTGACATGCT  | 39871 | TGG | 70 | 10 |
| GCTAACGGGAACGAGATTAT  | 20156 | GGG | 70 | 12 |
| CAAACGGCACGAACATGAA   | 33959 | TGG | 70 | 15 |
| TGTAACATGGGGCAATGCTA  | 34537 | AGG | 70 | 15 |
| AGAGTTATTACAAATACAAA  | 11907 | AGG | 70 | 25 |
| TTTAATATCAGTTGTTACAA  | 39    | AGG | 69 | 1  |
| TGAGACACAAATTTGAACAA  | 24826 | CGG | 69 | 1  |
| ATCTTTGCTTTATTATCAAA  | 38334 | CGG | 69 | 10 |
| ACACGTGTTGGTTATTTACA  | 16550 | TGG | 69 | 12 |
| ATGAGTGTCGTGAAGATTAA  | 9446  | CGG | 69 | 14 |
| TATGACGTTCTGCAAGTTTT  | 8545  | TGG | 69 | 18 |

|                       |       |     |    |    |
|-----------------------|-------|-----|----|----|
| TCTGGATTTGTACCGGAACC  | 34610 | TGG | 69 | 21 |
| AGTGCTGACGATATTGATAA  | 30518 | AGG | 69 | 39 |
| GCGCTTAACAAAATACTTAA  | 35789 | AGG | 69 | 39 |
| TATTAGACGAGTTAATTTAAA | 10350 | TGG | 68 | 1  |
| GCAAGCGACTACAAAAAAG   | 38685 | AGG | 68 | 9  |
| TAGCTCCTGCACAAGATGTA  | 14491 | GGG | 68 | 18 |
| CACAAATTATATTTTAGATA  | 27700 | AGG | 68 | 19 |
| GCATCTGCAAATACAATTTT  | 2197  | TGG | 68 | 21 |
| TTGCAAGGTTTCATACGGAAC | 8044  | TGG | 68 | 24 |
| CAACGTCGTTATATAGCGAC  | 39562 | AGG | 67 | 1  |
| TTTAGAACGATAAAAGAAAG  | 6907  | TGG | 67 | 5  |
| CGACGAAAGTTATTGGGATT  | 7647  | AGG | 67 | 8  |
| GAAAAACGGAAAACCGAAAA  | 7247  | GGG | 67 | 9  |
| AGAAAGGATTACATCAATAA  | 36068 | AGG | 67 | 12 |
| GTATACGGAAAAATTGGCTC  | 3923  | AGG | 67 | 13 |
| TTACAGGAGATGAGAGAAAA  | 4091  | CGG | 67 | 37 |
| AAAGCGTTCGGTTTATTGAC  | 25463 | TGG | 66 | 1  |
| AAAATCATAATCATGACGAG  | 37233 | CGG | 66 | 3  |
| AATGTAACGATTAGAAATGA  | 26663 | GGG | 66 | 11 |
| AGGGATATGTTCCAATAAC   | 31223 | CGG | 66 | 11 |
| TGTGGTTTTGTTGGTTGTAG  | 40161 | GGG | 66 | 12 |
| AAGATTCCGTGGAGTTTTAA  | 21585 | AGG | 66 | 15 |
| CTTCCTTAGATATGACTGTG  | 11288 | AGG | 65 | 1  |
| CTATGTAACTAATAGATCA   | 22699 | AGG | 65 | 1  |
| TTTTTAATTTAACACAAAGT  | 33916 | AGG | 65 | 7  |
| TTAGAGAAGCCTGGACAAGA  | 32428 | TGG | 65 | 11 |
| ACGCAAAGCGCTTTTAATAG  | 30811 | GGG | 65 | 12 |
| GTGTCGTACACTTATAACGA  | 20865 | TGG | 65 | 17 |
| TCTATTATAAGGAAAACTTT  | 588   | CGG | 64 | 2  |
| ACTTAAGGAGGAACAACAAA  | 942   | TGG | 64 | 4  |
| TCAAGTTGTCTATAAATATG  | 11840 | AGG | 64 | 5  |
| AGGGATAAATATAAATAAAG  | 36215 | AGG | 64 | 6  |
| TATTGGGGTTTTGTAACATG  | 34526 | GGG | 64 | 7  |
| TCAACTAATTCAGAATTAC   | 39451 | AGG | 64 | 7  |
| GTGCAATGTTTTTAAGAAT   | 30882 | TGG | 64 | 10 |
| CAATACTGTCTTTAAAGGAA  | 28069 | CGG | 64 | 17 |
| ACTAGCCAATTAGGGTGACG  | 35164 | CGG | 64 | 17 |
| CCCCTATCGTCGAATATTA   | 8589  | AGG | 64 | 27 |
| GGCGATTTTTCTTCCTAGTT  | 482   | CGG | 64 | 29 |
| GTATCTGAAGTGATTCCAT   | 30556 | AGG | 63 | 5  |
| TAATACACTTTACTTAATTA  | 37390 | AGG | 63 | 9  |
| GTGGTGTGGTTATTGTCA    | 35274 | GGG | 63 | 11 |
| TCGTCATGATTATGATTTTT  | 37213 | TGG | 63 | 27 |
| TTAGCATATATTGATACGAA  | 16721 | TGG | 62 | 3  |
| ATAGATGATATTGAAGCACA  | 16301 | AGG | 62 | 5  |

|                        |       |     |    |    |
|------------------------|-------|-----|----|----|
| GAATGTTGTCAAAAGAATAC   | 25411 | TGG | 62 | 9  |
| GTCGTGCTACAAAGATTCCG   | 21574 | TGG | 62 | 25 |
| AGACAAAGTATTGTATCAAA   | 30544 | TGG | 62 | 30 |
| CTAGTATCTTTTGAATATGG   | 34804 | AGG | 61 | 9  |
| CGAAAGTTATTGGGATTAGG   | 7650  | GGG | 61 | 16 |
| GATGAGCTTATTGGGGATAT   | 11447 | AGG | 60 | 4  |
| CACGGTGGAGGTAGTAGCTT   | 26462 | AGG | 60 | 6  |
| TGGAGTGTGGCTGAAAAAAT   | 26138 | GGG | 60 | 9  |
| GAGCCTTTATTTATATGAAA   | 17984 | TGG | 60 | 12 |
| GATAATCCGTTTTCCGAAAA   | 7185  | TGG | 59 | 2  |
| ACAATCCAATGTATTTTATT   | 38609 | AGG | 59 | 23 |
| TTGCTTACTGGCGACTTCTC   | 25898 | AGG | 58 | 1  |
| TTTTAGTTCTTTAGATGGGT   | 28772 | CGG | 58 | 1  |
| AAAATCGGAAGGTTTCCGGA   | 14721 | AGG | 58 | 2  |
| GCAGTCATTGGTGTATTCAT   | 25526 | TGG | 58 | 3  |
| TTTTAGGAAAGCGAGCATGG   | 29515 | AGG | 58 | 9  |
| AAAACCTTTCTGAAGAAAT    | 768   | TGG | 58 | 14 |
| GTCGTTTTCCCGTCAAAGTA   | 38434 | TGG | 58 | 20 |
| GTA CTGGTGGCGTTGGTAAA  | 31476 | TGG | 57 | 1  |
| AAAAACCTGTATTA ACTAAA  | 5956  | CGG | 57 | 3  |
| TATTAATAAAAAATGATA     | 39198 | TGG | 57 | 6  |
| GTAGGCGATTCTGTAGATCA   | 21230 | GGG | 57 | 9  |
| AGCCATACAATCCAGCTTTT   | 29499 | AGG | 57 | 10 |
| AACTGATTA AACTGTGTTAA  | 27399 | AGG | 57 | 16 |
| ACGGCAGACTTGAGCAACAG   | 32966 | TGG | 57 | 18 |
| ATATACGCGATATGAAAATG   | 34151 | TGG | 57 | 25 |
| TATAAATAATTTTCGTTCTA   | 30111 | GGG | 57 | 33 |
| GGTATCTTATATTGGTATAC   | 30626 | AGG | 56 | 5  |
| TCCGCAAAACGCCGTTATT    | 31228 | GGG | 56 | 5  |
| GACTGGGGTTACGAGCACTA   | 15834 | TGG | 56 | 11 |
| GACGAAAGTTATTGGGATTA   | 7648  | GGG | 56 | 12 |
| ATGGGGCAATGCTAAGGATA   | 34543 | TGG | 56 | 18 |
| AGATTTAGCGTTTTAAGGTG   | 5171  | TGG | 56 | 28 |
| TTAGCTATTGGTAAGTCGTA   | 21151 | AGG | 55 | 1  |
| GTATTCGATAATTTCTTTAT   | 7357  | AGG | 55 | 2  |
| ACTGCGATGTCTCCAGGTTT   | 34606 | CGG | 55 | 11 |
| GAAGAAAAAGAAAAGTGAAA   | 9068  | TGG | 55 | 14 |
| GTGCTAACAATTCATGTTCA   | 23295 | GGG | 55 | 16 |
| GTTGACAGTGCGTCCACACG   | 35528 | AGG | 55 | 23 |
| CTTACTACCTGCCTATATGG   | 14408 | TGG | 54 | 1  |
| TAATAACCTAGTAAGGTTAG   | 6262  | GGG | 54 | 3  |
| AATCTGGAAAGATGGGGAGT   | 10693 | TGG | 54 | 10 |
| GGAACAGCAGACGCAGGAAA   | 12379 | AGG | 54 | 12 |
| ATTGACTTTAAATATTTTCTGA | 21462 | TGG | 54 | 12 |
| CTGTAGGCTTTCTAGTCTTT   | 34380 | GGG | 54 | 15 |

|                       |       |     |    |    |
|-----------------------|-------|-----|----|----|
| CTGGCGACTTCTCAGGTGCT  | 25905 | TGG | 53 | 2  |
| AGAGAATTACAAGGAAATCA  | 23225 | TGG | 53 | 9  |
| TTAGCAGTAGTTGCAGTCAT  | 25514 | TGG | 53 | 21 |
| TTTCAATTAATAACCTAGTA  | 6269  | AGG | 53 | 23 |
| TCACACTTATTGAGGAGCAT  | 12817 | GGG | 52 | 7  |
| AGAGGATAGCTCTTTATTAA  | 26522 | AGG | 52 | 9  |
| AACCGCAACTGTGTAATATG  | 5622  | CGG | 52 | 10 |
| TAAACTTAAATCTTTATATA  | 15068 | CGG | 52 | 11 |
| GGAGACCTAATCATATTACA  | 29168 | AGG | 52 | 11 |
| CTAAAGCTACTGTGGAAGCT  | 23937 | TGG | 52 | 13 |
| GCAACATGGTTTGGGAATACG | 10259 | AGG | 52 | 18 |
| ATTATCGACGATGTTGTAAG  | 36461 | AGG | 52 | 22 |
| CCCTGGCAACGGAATAGGTT  | 34651 | CGG | 51 | 1  |
| AGTCACAGGTGTAATGCTTG  | 33892 | AGG | 51 | 2  |
| TAACCTTATTTTAGAGGAGA  | 10294 | TGG | 51 | 4  |
| TAGCCACTCATATTCTTCAA  | 14783 | AGG | 51 | 5  |
| GATGCCGAAATATCGAGTGT  | 10913 | GGG | 51 | 6  |
| GCTTAAACCAACTGAATAGG  | 20434 | AGG | 51 | 9  |
| ATGATGCAGGTATCTTATAT  | 30618 | TGG | 51 | 11 |
| CAATATTAGAAAATAAAGTG  | 19509 | AGG | 51 | 14 |
| CTAAAAATTAATTAAGGA    | 4603  | CGG | 50 | 1  |
| AAGTAGCTGAACAATCAAAA  | 14763 | TGG | 50 | 3  |
| GTAGCTGTCCAAATCATAGT  | 25853 | AGG | 50 | 10 |
| GGAGACTTCCAAGAAGCTGA  | 30758 | GGG | 50 | 11 |
| AAAAGATTATGGCTTATATT  | 38934 | GGG | 50 | 13 |
| GGCGTTGCGCAACCTGGTTG  | 38551 | GGG | 50 | 14 |
| ACCAGCTTAATGTAATAAT   | 28247 | TGG | 50 | 23 |
| TGATTGGCTTATTGGTGGTC  | 23353 | AGG | 49 | 1  |
| TCTTAGGATTCCATCTAATT  | 36090 | CGG | 49 | 2  |
| TTACTACCTGCCTATATGGT  | 14409 | GGG | 49 | 4  |
| ACAAAGCGTTCTTGATAAT   | 21028 | TGG | 49 | 11 |
| AAAAGTGGAACGGTAAAGGT  | 38522 | TGG | 49 | 11 |
| TGAAAAAGGGCAAACGCTTG  | 40267 | TGG | 49 | 28 |
| TGAAGAAGAAATATTTAAGA  | 20675 | TGG | 48 | 3  |
| GCCTACAGCTAGTGAAGTGG  | 34411 | TGG | 48 | 4  |
| ATGATTGGTTACACGGTTAT  | 29199 | TGG | 48 | 7  |
| TTCTGGGCGTGCTTCTGGTT  | 34287 | TGG | 48 | 7  |
| ACGGATACAAAACGTTTTTA  | 29249 | CGG | 48 | 14 |
| TCGAAACCTTGTAAGTAGTT  | 30652 | AGG | 48 | 28 |
| CAAAGTAGGGTAACTTGG    | 29398 | AGG | 47 | 2  |
| TAAGGGAGTGTGGGAAATGA  | 12635 | CGG | 47 | 4  |
| GAAGCATTGAATAGCATAGG  | 24743 | TGG | 47 | 4  |
| GTATAACCTGCTGGCACTGG  | 39324 | TGG | 47 | 5  |
| CGCACGCAAGTTTGAGGATT  | 24688 | GGG | 47 | 9  |
| AACTAGAGTAATTAACATAA  | 14532 | AGG | 47 | 13 |

|                       |       |     |    |    |
|-----------------------|-------|-----|----|----|
| AATCGAACGCTTTCAATGTT  | 26027 | TGG | 47 | 16 |
| TCGTAAC TATTCTGATATAG | 26889 | AGG | 47 | 20 |
| GGATTTAACTAGAATAACTG  | 25432 | GGG | 46 | 7  |
| GTACAAGTTGGTCACAGATA  | 26049 | TGG | 46 | 17 |
| CTTGCTCTTTTGGTTCGAAT  | 30024 | CGG | 46 | 18 |
| TCATTTTATGGCAAAGATTA  | 23620 | TGG | 46 | 21 |
| GTCCGCAAACGCCGGTTAT   | 31227 | TGG | 46 | 21 |
| TTACATTTGTTTATGGAAGA  | 36413 | TGG | 45 | 1  |
| TGATGGAGTAGGGCCTCGTG  | 35525 | TGG | 45 | 4  |
| GCTTTACTAAGA ACTATTTT | 34216 | TGG | 45 | 5  |
| AGATTGCTTGTTAAAAACGG  | 30218 | CGG | 45 | 6  |
| ATCTCTTAGAGCCGAAAAAT  | 10081 | TGG | 45 | 11 |
| AAAGAAGATTTTGAACTGG   | 16457 | TGG | 45 | 19 |
| TGCGTCAGATTTAAGTGATG  | 33560 | AGG | 45 | 24 |
| AGGTGATGTTGTTAGAGTGG  | 28588 | TGG | 44 | 1  |
| TATTCTATTTTGTGGTAAG   | 33082 | TGG | 44 | 5  |
| CGAACCAAAGAGCAAGAAC   | 30046 | CGG | 44 | 7  |
| GGACCTAGAAGAGAAAATTG  | 6598  | TGG | 44 | 9  |
| AATACAGCATCTATAAGAAT  | 36335 | AGG | 44 | 11 |
| AACCTTTTTAGGTATCTTGT  | 36476 | AGG | 44 | 17 |
| TTAGCTGACATGTTGGCGTT  | 12076 | TGG | 44 | 19 |
| ATCACACTTATTGAGGAGCA  | 12816 | TGG | 43 | 2  |
| AATTTAGGTTCAAGTGATTT  | 37675 | AGG | 43 | 3  |
| AGACATATTAGATCGAGTCA  | 12412 | AGG | 43 | 9  |
| AAAATTTAAACTATTTTCAGG | 12663 | TGG | 43 | 10 |
| TTTGTTATTACAGGTCATGA  | 4292  | AGG | 43 | 12 |
| TCAACTAGTTTGTTAATGTT  | 21767 | AGG | 42 | 1  |
| ACTAATTTACAGAAATGTT   | 29027 | AGG | 42 | 2  |
| ACAGTTATTAATAACTATT   | 39690 | TGG | 42 | 6  |
| TGATCAGAAAGCATAAAAAA  | 3041  | TGG | 42 | 8  |
| TTGCCTTGTTCTTTTTTATA  | 39366 | AGG | 42 | 8  |
| TCTGTGGTTTTGTTGGTTGT  | 40163 | AGG | 42 | 8  |
| AAAGCAAAGATTGAAAAATA  | 38362 | TGG | 42 | 9  |
| ATGTCGATAGAGAGGCTACA  | 35130 | TGG | 41 | 1  |
| CAAGGCGCACCCGGTAAAAA  | 36845 | CGG | 41 | 3  |
| ACCGTTAAAGAATGGTCATG  | 9984  | AGG | 41 | 4  |
| GAAATCAACAGAATTATTGA  | 1024  | CGG | 41 | 6  |
| ATATAAATAATTTTCGTTCT  | 30112 | AGG | 41 | 8  |
| TAATGATGGAAGTATATTGT  | 7326  | CGG | 41 | 9  |
| CGAAACCTTGTAAGTAGTTA  | 30651 | GGG | 41 | 9  |
| AGTGACCTAAAACGATTCAA  | 8760  | AGG | 41 | 10 |
| CTAAAGCTAAGAGTAATCAA  | 12509 | AGG | 41 | 10 |
| ATAGGCACGTTAGAGAAGCC  | 32419 | TGG | 41 | 10 |
| TAACTTTATCCACATAAAGG  | 6707  | TGG | 41 | 12 |
| CTACGTTCAATAAATGTGAA  | 14455 | AGG | 41 | 13 |

|                       |       |     |    |    |
|-----------------------|-------|-----|----|----|
| ATGCAGTAATGCAATCATTT  | 30099 | TGG | 40 | 3  |
| TAAAAAGTCTACAGGGTGTA  | 27744 | GGG | 40 | 9  |
| AGCAGTTTAAACGACATGCTA | 18841 | AGG | 40 | 10 |
| GATATTGGGGTTTTGTAACA  | 34524 | TGG | 40 | 11 |
| ATCAGTTACGTTCAAGAGAA  | 25130 | TGG | 40 | 13 |
| AGATGGCACGGAAGATATTA  | 8654  | AGG | 40 | 17 |
| AGAGAACTTGTATTGAACAA  | 12980 | AGG | 40 | 21 |
| ATAGGTATCAATGACAAACA  | 36353 | AGG | 40 | 22 |
| TTTGACAAGTATGTTCAAAA  | 19381 | AGG | 39 | 2  |
| GTCCCTTATAAAAAAGAACA  | 39379 | AGG | 39 | 3  |
| GGAAAGCATATATTGACGCA  | 14640 | GGG | 39 | 4  |
| GATTCGTTACTAATTTAGC   | 25241 | TGG | 39 | 18 |
| AGCAAACGCACGCAAGTTTG  | 24682 | AGG | 39 | 28 |
| ACAACATTAATAAATTAATGA | 22794 | CGG | 38 | 1  |
| CAAAGCGATTTTACAATTTT  | 22961 | GGG | 38 | 2  |
| CGTGCAGACGGTAAACATCA  | 22431 | CGG | 38 | 5  |
| TAGAAACATTCTCTAAACT   | 6734  | TGG | 38 | 8  |
| GTATTTTAGGTGGCGTATTT  | 25323 | TGG | 38 | 10 |
| CACATTGACTTACTAGAAAA  | 5280  | CGG | 38 | 12 |
| GTATTACGAAAGCGTGGACG  | 8888  | AGG | 38 | 12 |
| GAACTATTTTTGGTATTTAA  | 34226 | AGG | 38 | 20 |
| GAATTCGTTGAACTTTGTTG  | 30490 | AGG | 37 | 4  |
| AATGCTTTTAGTTCTTTAGA  | 28777 | TGG | 37 | 7  |
| GTATCAAATGGATATACCTA  | 30556 | TGG | 37 | 8  |
| CAAAAAGTGTTTCTGGTCTA  | 7535  | AGG | 37 | 9  |
| ACTGGATAGACAAATGTCTA  | 35617 | GGG | 37 | 10 |
| TCTCAGAAGATAGCGAAGAT  | 22879 | GGG | 36 | 1  |
| AATGGAACAAGTGATATTTG  | 24176 | GGG | 36 | 1  |
| TTACTGCCAAAAGTGTTTC   | 7542  | TGG | 36 | 3  |
| AGATCGAGTCAAGGAGGTTT  | 12421 | TGG | 36 | 4  |
| CAAGGTATTATGAGTGGAGA  | 18153 | GGG | 36 | 4  |
| TCGAGCAGTATTTTTCATAG  | 21691 | AGG | 36 | 4  |
| ACCTCGTGACCTTTTTCGTT  | 29533 | AGG | 36 | 7  |
| TTAGCTGAAATAGTACGAGG  | 22263 | CGG | 36 | 14 |
| CTTAAACCGCCATTTTAGCG  | 23979 | GGG | 36 | 14 |
| ACAATTGCGTTCCAAGCCAT  | 25817 | AGG | 35 | 1  |
| AATGGTTACGAGTATAAAGA  | 7816  | CGG | 35 | 4  |
| TTATCGCTATTGCGTTAGAT  | 6830  | TGG | 35 | 7  |
| AAACTTTAGATGCTATCCAG  | 34085 | AGG | 35 | 16 |
| GCTCCGCCACCATACTTTGA  | 38427 | CGG | 35 | 18 |
| TGCCTTGTTCTTTTTTATAA  | 39365 | GGG | 34 | 1  |
| AATTAAGTGGTACGTAGACA  | 33803 | TGG | 34 | 2  |
| ACAGCAAATGGACAATAAA   | 37579 | TGG | 34 | 2  |
| CCCTAACGAAAAGGTCACG   | 29548 | AGG | 34 | 3  |
| ATGGAAGAGAAAAATCTTG   | 19122 | AGG | 34 | 4  |



|                        |       |     |    |    |
|------------------------|-------|-----|----|----|
| GGCGATTCTGTAGATCAGGG   | 21233 | CGG | 34 | 6  |
| CTTATACCGAGAAGATGGCA   | 8642  | CGG | 34 | 8  |
| GCTGTAGGCTTTCTAGTCTT   | 34381 | TGG | 34 | 9  |
| CCGTTTTATAAAAAGAATGA   | 32611 | TGG | 34 | 13 |
| ATTGGCGACTCTGTAGCTAG   | 28991 | AGG | 33 | 1  |
| CCTCGTGACCTTTTTCGTTA   | 29532 | GGG | 33 | 1  |
| GAGTGGGCAAAGTCGAATAT   | 34433 | TGG | 33 | 1  |
| ATGCTTGGTTTTTCGTCTGA   | 35542 | TGG | 33 | 1  |
| TATTCGATAATTTCTTTATA   | 7356  | GGG | 33 | 3  |
| TCAATCCTGACACTAAAATG   | 36882 | TGG | 33 | 3  |
| AATCAATTCTTAGCGAATAA   | 37925 | AGG | 33 | 3  |
| GATTATTTAACGTATTTAAA   | 29819 | TGG | 33 | 4  |
| AGGCACAGGGCGATGAAAAT   | 8521  | AGG | 33 | 6  |
| GATTAaaaaaaacttaaaaata | 13269 | TGG | 33 | 6  |
| ACTGATGATGATTGGTTACA   | 29192 | CGG | 33 | 6  |
| GATTGGTTAACTCAATTGTG   | 25655 | GGG | 33 | 8  |
| TTTGAAAGCAGTGGCCAATT   | 5136  | TGG | 32 | 1  |
| ATTACACAAGGTATTATGAG   | 18147 | TGG | 32 | 1  |
| TGATAGCATGGTTGTTGAAT   | 21320 | TGG | 32 | 1  |
| GATGATGAGGATTCTGAAAT   | 16664 | AGG | 32 | 2  |
| TGATTTCTTAAATGCCGGAG   | 26326 | CGG | 32 | 8  |
| GGACAAGATGGTGTGATGA    | 32440 | CGG | 32 | 8  |
| GATCAGAATTTTAAATCAAG   | 18402 | TGG | 32 | 9  |
| GAAATGTACGAGATGGAAGG   | 10559 | AGG | 32 | 11 |
| GAAGCAGTAGGGATTATGAC   | 11817 | GGG | 32 | 13 |
| GATCGAGTCAAGGAGGTTTT   | 12422 | GGG | 31 | 1  |
| ATGAAGGCTTTTTCCATACT   | 37484 | TGG | 31 | 6  |
| GGTATTAaaacagcagtttc   | 25613 | CGG | 31 | 8  |
| TGTAGACTTTTAAATAAAAT   | 27718 | TGG | 31 | 8  |
| ATGCTCGCTTTCCTAAAAGC   | 29494 | TGG | 31 | 10 |
| CATACAAAAGAAAATGAAA    | 12338 | AGG | 31 | 11 |
| TGCAAAAGATTTCTTTAATG   | 19849 | AGG | 31 | 14 |
| CACTACAGCATGGTCAATTG   | 3164  | CGG | 30 | 1  |
| TACTTGATAGTTCTATTATA   | 577   | AGG | 30 | 2  |
| ATAACCAAATGTTCAAGAAA   | 9771  | TGG | 30 | 2  |
| GTAGGAGTGAACATATAGC    | 40021 | CGG | 30 | 2  |
| GGTCTTGGAGTTGTTGGCTT   | 24431 | TGG | 30 | 3  |
| CGTTAGCACTAATGGGTGAT   | 20226 | TGG | 30 | 4  |
| TTGATATTGATTCCAGCAGA   | 24057 | TGG | 30 | 5  |
| CCTTGATACAACAGTGTTTT   | 40319 | TGG | 30 | 5  |
| GCAATGGTTGCTAAAGATAA   | 18291 | CGG | 30 | 6  |
| TTATTTTTTTCGTTTTTTTTG  | 40224 | GGG | 30 | 8  |
| ATGGTTGCAAAAAGAGTACG   | 9533  | TGG | 30 | 10 |
| AATCAATCGCAACAGAGATT   | 14055 | GGG | 30 | 11 |
| ATGGCAGTACTTAATGCGGT   | 24359 | TGG | 29 | 1  |

|                       |       |     |    |    |
|-----------------------|-------|-----|----|----|
| AACGTTGCCGAAACCACAAG  | 13943 | GGG | 29 | 9  |
| GAATGTAACGATTAGAAATG  | 26662 | AGG | 29 | 11 |
| CTTAATTTAGGCAAGTATCA  | 35753 | AGG | 29 | 11 |
| CTCAACCGACGGTTAAAATT  | 37323 | TGG | 29 | 14 |
| TAACGCGCTAGGTAAAGCGC  | 19269 | AGG | 28 | 4  |
| ATGCCTATATTACAAGTATT  | 25706 | AGG | 28 | 4  |
| TCTCTATCGACATATAAATG  | 35104 | CGG | 28 | 6  |
| TTTGAGTGGTTACGTCAAAA  | 2324  | CGG | 28 | 17 |
| GCGCCAGAAAAGACGGATAT  | 32401 | AGG | 28 | 17 |
| TTTAACTAGAATAACTGGGG  | 25435 | TGG | 27 | 1  |
| GGATTTTAGGATATAGCTTC  | 34270 | TGG | 27 | 1  |
| GCAGCAGGAGAAAGCGCAAG  | 39001 | TGG | 27 | 1  |
| CAATTTTTAGTTAGAACTT   | 31454 | TGG | 27 | 2  |
| GGAATATCAGGAGTCAATAG  | 37696 | CGG | 27 | 2  |
| CAACTAGTTTGTTAATGTTA  | 21766 | GGG | 27 | 7  |
| CATTATTGCAGGTAATAATC  | 24323 | CGG | 27 | 8  |
| AAGAATGAAAAGTAGATTTAA | 36755 | AGG | 27 | 8  |
| GCTACAAGCATAATTTTTTT  | 38703 | AGG | 27 | 9  |
| GAGGTGATTACCATGCTTAA  | 34248 | AGG | 27 | 16 |
| TGGAAATCATATTTATACGG  | 4814  | CGG | 26 | 2  |
| TGCGCTTAAAACGCTATCTA  | 32320 | TGG | 26 | 3  |
| TTGGTTGTATTTTTTGATTG  | 7577  | AGG | 26 | 5  |
| TGGCACCTGGCAACGGAAT   | 34646 | AGG | 26 | 9  |
| AATGGCAGTTGTGACGTGGA  | 2593  | AGG | 26 | 10 |
| GGTACTGGTATATATGCTAC  | 21540 | TGG | 26 | 10 |
| ATACTTGCTGGTGCAACATT  | 15261 | AGG | 26 | 11 |
| TTCGACTAAAGGTAAGAGTG  | 14665 | GGG | 25 | 1  |
| ATCATTCTGATTGGTTATTT  | 17670 | TGG | 25 | 2  |
| TTCCGCATATTACACAGTTG  | 5608  | CGG | 25 | 4  |
| GAATACTTAAACCAATTTTT  | 10086 | CGG | 25 | 4  |
| AGAAGTAAAAGATTATCTAA  | 18990 | AGG | 25 | 4  |
| GGCTTGAGAGAGCAAATAAA  | 13999 | AGG | 25 | 8  |
| AATTCCGGTTCTTGCTCTTT  | 30034 | TGG | 25 | 12 |
| TTATCGGGCAGTCAATGTT   | 34477 | GGG | 25 | 13 |
| CGAGTACACTTTTTAAAAAT  | 14706 | CGG | 24 | 1  |
| AAACACGCTGTACAAACAGG  | 22374 | TGG | 24 | 1  |
| CGAAGATAGTACCGAAAGTT  | 24243 | CGG | 24 | 1  |
| GCGACAGGCGAAAGGCTGCA  | 38308 | AGG | 24 | 1  |
| AGAAACATTCTCTAAAATT   | 6733  | GGG | 24 | 3  |
| AATGTTATGAATATCATACA  | 25778 | AGG | 24 | 4  |
| AGGAGACTTCCAAGAAGCTG  | 30757 | AGG | 24 | 4  |
| TTAATCGGCAAAGTAGCTGA  | 26351 | GGG | 24 | 5  |
| TAAAATAACTTTTTATTAGA  | 34684 | TGG | 24 | 5  |
| TCTATCTACGTTATAATCAT  | 31711 | CGG | 24 | 6  |
| GCAGGAGAAAGCGCAAGTGG  | 39004 | TGG | 24 | 7  |

|                       |       |     |    |    |
|-----------------------|-------|-----|----|----|
| GATAGATTGCTTGTTAAAAA  | 30215 | CGG | 24 | 8  |
| GGTCAAAACTGGAACGGTAA  | 38518 | AGG | 24 | 13 |
| ATACACTTTACTTAATTAAG  | 37392 | GGG | 24 | 17 |
| AATCAAGAAAAGTTTTATAA  | 4674  | CGG | 23 | 2  |
| ATTATCGGCAAACGGGTTTT  | 7218  | CGG | 23 | 3  |
| CCTTGCAATATTAATGATTT  | 8013  | TGG | 23 | 4  |
| GCAAAAGCAGTCAAAGCTAA  | 8092  | AGG | 23 | 4  |
| CCGAAAAAATCTCATACATG  | 35645 | GGG | 23 | 4  |
| CTTAATGCGGTTGGTGTATT  | 24368 | AGG | 23 | 5  |
| GGCTTACACCCTAACGAAAA  | 29540 | AGG | 23 | 5  |
| GTTTTCGGAAAACGGAAAAA  | 7233  | CGG | 23 | 6  |
| ATACTCAAAGTAATCATTTT  | 11235 | CGG | 23 | 7  |
| CCCTTTAACCGCCATTTTAG  | 23981 | CGG | 23 | 7  |
| TACTATGATTTGGACAGCTA  | 25835 | CGG | 23 | 9  |
| AGCAACGTGATGAGCTTATT  | 11439 | GGG | 23 | 12 |
| AAATCAATCGCAACAGAGAT  | 14054 | TGG | 23 | 13 |
| ACGCACGCAAGTTTGAGGAT  | 24687 | TGG | 23 | 13 |
| TTCCAGCCTGGATATAAAAC  | 27618 | CGG | 23 | 13 |
| AGAGTGGTGGATTCTGCCAT  | 28601 | AGG | 23 | 15 |
| ATTATTGAAGGCGCATCAAA  | 6762  | AGG | 22 | 2  |
| TGGTAAATGGAGTTTATTTCG | 31489 | AGG | 22 | 6  |
| GAAGTTTCAACTTATTATAA  | 26736 | GGG | 22 | 9  |
| TAAACTTTTGAAATCTAAAA  | 725   | TGG | 21 | 1  |
| ATCAAAATGGACACGCCAAA  | 14776 | AGG | 21 | 1  |
| ACTGTTCTATGAAAGTTGCA  | 5488  | AGG | 21 | 2  |
| CGGACTGTTAGGGTACGCGA  | 18897 | AGG | 21 | 2  |
| TCGATAAGAAAATAGAAGAG  | 21349 | TGG | 21 | 2  |
| CATCACTCAATTTATTCCAT  | 30860 | CGG | 21 | 2  |
| TATGGATCTATTGTGTTAAT  | 15852 | AGG | 21 | 3  |
| GCGGTTGGTGTATTAGGTGG  | 24374 | TGG | 21 | 3  |
| TTAATAGCCGGTGCGATTCA  | 39256 | TGG | 21 | 3  |
| TTGCGATAGCGTATGCTAGG  | 8057  | TGG | 21 | 7  |
| GAAGTAAAAGATTATCTAAA  | 18991 | GGG | 21 | 12 |
| TCAGTCTGATTTGATGAGGG  | 13787 | CGG | 20 | 1  |
| AAAAATCTCATACATGGGGC  | 35649 | TGG | 20 | 1  |
| AACGTAATATCAACGGTATG  | 15706 | TGG | 20 | 3  |
| CTTCCAATAGAAATAGTGTG  | 20983 | AGG | 20 | 3  |
| GTGACGCGGGTCATCAAAAT  | 35150 | TGG | 20 | 3  |
| TGGTAACTTTTATTTTATTG  | 15887 | AGG | 20 | 4  |
| AATGAATTGATAAAAAAGAA  | 9497  | CGG | 20 | 5  |
| GTTACTATAACTAAAATTAT  | 33319 | GGG | 20 | 5  |
| TATTGACTAAAGGTAAGAG   | 14663 | TGG | 20 | 8  |
| GATATTGATGAGTATATCGA  | 17706 | GGG | 20 | 8  |
| GGTGTCCCTGATTACATTAG  | 20886 | TGG | 20 | 10 |
| GGATATTTATTTTATAGGTAA | 37521 | GGG | 20 | 10 |

|                       |       |     |    |    |
|-----------------------|-------|-----|----|----|
| ACAGGTCACAGTAAAGTAAG  | 15390 | TGG | 19 | 1  |
| TTTATAAAAAAATTGAAAAG  | 22742 | AGG | 19 | 1  |
| CACCTGCTGAATGGCGTGAT  | 23337 | TGG | 19 | 1  |
| AGTGCTTGCTGGAATGTGAA  | 35581 | TGG | 19 | 1  |
| ATAGAAGAGTGGGTTAAAAA  | 21360 | AGG | 19 | 3  |
| CAATAGTGGTTTTTTCAAGA  | 23108 | GGG | 19 | 3  |
| ATATCGCTGAGAAAAATAAA  | 3882  | AGG | 19 | 4  |
| ATTGAACAAAGCACCGAATA  | 23153 | TGG | 19 | 4  |
| TCAATTGCAGGGTTCCAAAA  | 21635 | TGG | 19 | 5  |
| AAAGTAGGTGGCGTAATGTT  | 33931 | TGG | 19 | 5  |
| GACGCAGGGTATTCGACTAA  | 14654 | AGG | 19 | 6  |
| AGACATAAAAAGAAAAACGA  | 22116 | AGG | 19 | 8  |
| TAACAACTAGTTGATGATA   | 21791 | GGG | 19 | 13 |
| GTATTAGGTGGTGGCGTTTT  | 24383 | AGG | 19 | 13 |
| AATGATGAAAGAGAATTACA  | 23216 | AGG | 18 | 1  |
| ATTATGAGAAAAGAAGTAAA  | 24158 | TGG | 18 | 1  |
| ATATTGGGGTTTTGTAACAT  | 34525 | GGG | 18 | 1  |
| GCTAATAATAAAGATTCTAC  | 22187 | TGG | 18 | 2  |
| AACAAAGATAAAGATGATGA  | 4319  | AGG | 18 | 3  |
| TAATCCTGCAGAAGATATTA  | 20469 | AGG | 18 | 3  |
| ATTTATTCCATCGGCCAAAG  | 30869 | AGG | 18 | 3  |
| AAAGATTTAATAAACGAATT  | 11543 | TGG | 18 | 4  |
| TGCGCACAAAGTAGTCAGCG  | 26386 | CGG | 18 | 6  |
| AAACTTTTACTCAAGAAAAA  | 20634 | TGG | 18 | 7  |
| GTCGTCGAGTTGTAGCTCGG  | 1048  | CGG | 18 | 8  |
| GTACTGCCTGGACACTATAA  | 31097 | TGG | 18 | 9  |
| TTAAGTTTCATTCCAATGAT  | 17299 | AGG | 17 | 1  |
| ATACTTTGCCGTTATTACAA  | 23068 | GGG | 17 | 1  |
| ACAGTTTTTACGACTAAAGG  | 29601 | AGG | 17 | 1  |
| CTCTAAACGCTTTCGGTAAC  | 31038 | GGG | 17 | 1  |
| GGTGTCATTACTTCTTTAAT  | 38104 | AGG | 17 | 1  |
| ACTTTTTGGCAGTAAATTTG  | 7566  | AGG | 17 | 2  |
| GGGATTACTAAAAGAGATTG  | 11702 | AGG | 17 | 4  |
| ATACAAGCTAGGTAAAAGT   | 13537 | AGG | 17 | 4  |
| AAAGAATTCAATGAAGTCGA  | 24101 | AGG | 17 | 4  |
| ACATTA AAACTTTTTATGTG | 33760 | TGG | 17 | 4  |
| GGTTATTTTTTTCGTTTTTT  | 40222 | TGG | 17 | 4  |
| GATGATAGGAGATGCTGAAA  | 16999 | AGG | 17 | 7  |
| GCATCTAAATTCGAGGGATT  | 28124 | AGG | 17 | 10 |
| ACCGATAGGCACTGATAAAA  | 29230 | CGG | 17 | 11 |
| AAGATAAAGCGTTATTATAT  | 5590  | TGG | 17 | 12 |
| TTGGACAACTTAACAATAG   | 23094 | TGG | 17 | 12 |
| GCGTCTTTAAAAATAAAAAA  | 69    | GGG | 16 | 1  |
| GATATAGAAGTAATAAGGAA  | 26782 | TGG | 16 | 1  |
| ACCATGCTTAAAGGGATTTT  | 34257 | AGG | 16 | 1  |

|                        |       |     |    |    |
|------------------------|-------|-----|----|----|
| ATGTACGTAGCGGTATAATG   | 37640 | AGG | 16 | 1  |
| GCTACTAAAATCCGAACTTT   | 24248 | CGG | 16 | 2  |
| GCGATGCGATTTTCATCAGCT  | 26412 | TGG | 16 | 3  |
| AGTTACTATAACTAAAATTA   | 33318 | TGG | 16 | 3  |
| TTGAATCGCGTTAGGTAATG   | 33127 | CGG | 16 | 5  |
| ATCGATGAGAACATCTAATG   | 14318 | TGG | 16 | 8  |
| TGGGTAATAGACATCAAAAA   | 6015  | AGG | 15 | 1  |
| CAGCGACGAAAAGAAAATCA   | 8732  | TGG | 15 | 1  |
| ACAGTTGAATACGAAAATTT   | 22605 | CGG | 15 | 2  |
| GCTGGGTTCTGTATTGGTAA   | 30943 | CGG | 15 | 3  |
| GGGACCAACAGTCAGATACA   | 40035 | TGG | 15 | 3  |
| TTCACCTTTCTATACAGATAA  | 27493 | AGG | 15 | 4  |
| AAATAAAAAAGGGCAGAAAA   | 79    | AGG | 15 | 5  |
| CTAAGTGATATTACGGAAGT   | 30986 | TGG | 15 | 5  |
| AATAATGCGCAAGGCGATTT   | 32779 | GGG | 15 | 5  |
| GCTAAGTTATATAAACAAAT   | 36170 | CGG | 15 | 5  |
| TTAAACTTTATTATCACAAA   | 26168 | AGG | 15 | 7  |
| TAATGTGCCAGGTCTGCGTG   | 5633  | AGG | 15 | 8  |
| TGGCGTGATTGGCTTATTGG   | 23348 | TGG | 14 | 1  |
| ATCGAGTCAAGGAGGTTTTG   | 12423 | GGG | 14 | 2  |
| AAATAATGCGCAAGGCGATT   | 32778 | TGG | 14 | 2  |
| AGTGGCATTGTTGTTACTGCAA | 25195 | TGG | 14 | 3  |
| AGACCATTATTTGATGCTAA   | 20141 | CGG | 14 | 4  |
| GTTTTAGGTGTTTTGGTAAT   | 25745 | AGG | 14 | 4  |
| GATAATTTTGTAATATTCTT   | 31243 | AGG | 14 | 4  |
| TGAACTATATAGCCGGGCAG   | 40028 | AGG | 14 | 4  |
| ACGAAAGTTATTGGGATTAG   | 7649  | GGG | 14 | 5  |
| ACGATAGTAGACGCAATTAA   | 31774 | TGG | 14 | 6  |
| CTAGAATCATATTGCTAAAA   | 29826 | CGG | 13 | 1  |
| GGTAAATGGAGTTTATTCGA   | 31490 | GGG | 13 | 1  |
| TCCTAAATTAATAGGATCTG   | 40179 | TGG | 13 | 1  |
| CTTCAACATATTTTTCAAA    | 12695 | AGG | 13 | 3  |
| ATTATTTCAGTGTACTTTTT   | 13049 | CGG | 13 | 3  |
| TTTGTGCTAGGACTCATAGA   | 14606 | GGG | 13 | 3  |
| GGTAATGTGCCTGGAGATAA   | 22338 | AGG | 13 | 3  |
| AACAAAATACTTAAAGGAAA   | 35795 | AGG | 13 | 3  |
| ATGACGTTTGCTAAAAATAA   | 35999 | AGG | 13 | 3  |
| TTCGTAAGTGGACACGGTGG   | 26450 | AGG | 13 | 4  |
| TCTGTAACCTTCATTCGTAAG  | 26438 | TGG | 13 | 5  |
| GAACCAAGCTATGTTGATAG   | 377   | AGG | 13 | 6  |
| ATCGCTATTGCGTTAGATTG   | 6828  | GGG | 13 | 6  |
| GCCAGGCAATGTTATTTTAT   | 19561 | CGG | 13 | 6  |
| TAAACGCAACGATTGATATA   | 9279  | AGG | 13 | 7  |
| GAAAAAGACATTTGATACAG   | 10214 | CGG | 13 | 12 |
| GATAATTTCTTTATAGGGAA   | 7351  | TGG | 12 | 1  |

|                       |       |     |    |   |
|-----------------------|-------|-----|----|---|
| TTCTTAGAGTTATTGAAGAA  | 14094 | AGG | 12 | 1 |
| TTTTGTGCAAAGTACGAATG  | 10797 | AGG | 12 | 3 |
| GAAACTAAAAATTAATTA    | 4599  | AGG | 12 | 4 |
| AAAAGAGTTGTCTCAAATGT  | 26258 | AGG | 12 | 4 |
| GCAGGTAAAAAAGGAGAACA  | 36827 | AGG | 12 | 6 |
| AATAAAAAAGGGCAGAAAA   | 80    | GGG | 11 | 1 |
| GTTCAATATAAACGAAAA    | 3300  | CGG | 11 | 1 |
| TAAATGGGCGCGAGAAAATC  | 10366 | CGG | 11 | 1 |
| GGCTTTTGTAGATACAGAAGA | 19045 | AGG | 11 | 1 |
| TAAGGCTTGATATCAAAGCT  | 27969 | AGG | 11 | 1 |
| GACACGGACAAAAACAACT   | 29384 | AGG | 11 | 1 |
| TCTCCAGCAAAGCAATCAT   | 36029 | GGG | 11 | 1 |
| GTCAGTTGTATGAAAATATA  | 12617 | AGG | 11 | 2 |
| TCAGGTACCGACCATTTTTTC | 27288 | AGG | 11 | 2 |
| GTTTGTGCTAGGACTCATAG  | 14605 | AGG | 11 | 3 |
| CGGAATACTAGAAGATGTTA  | 20705 | GGG | 11 | 3 |
| GGAGATAAAATAATCTTCGA  | 27553 | CGG | 11 | 4 |
| GATACATTGATGGAGAATTA  | 30264 | TGG | 11 | 4 |
| CGTTTGCTAAAAATAAAGGT  | 36003 | TGG | 11 | 4 |
| ATGTAACTAATAGATCAAG   | 22701 | GGG | 11 | 5 |
| CAATGGACTTTACATTTGAA  | 19451 | GGG | 11 | 8 |
| GTAAGCGATAAAACAATTA   | 21065 | AGG | 10 | 1 |
| TTATCACAAAAGGTTCTGAA  | 26178 | TGG | 10 | 1 |
| GGTAGCGTTGAAAGTTATGA  | 32851 | GGG | 10 | 1 |
| GATTAATATAGATAATTATC  | 34462 | GGG | 10 | 1 |
| ATGACGTTAATCTGGAAAGA  | 10685 | TGG | 10 | 3 |
| ACACGGACAAAAACAACTA   | 29385 | GGG | 10 | 3 |
| TAGGTGCTATAACTAAAATG  | 27864 | TGG | 10 | 4 |
| AGATGCAAACCCCGCTAAAA  | 23986 | TGG | 10 | 5 |
| CTAGTTATTGAAGTATGTGG  | 35198 | TGG | 10 | 5 |
| GTAAGAATTATCTTAAGACG  | 14303 | TGG | 10 | 7 |
| TGACACCAATTTCTTCAGAA  | 757   | AGG | 10 | 8 |
| ATCGTATTTGAAAATGATGA  | 4779  | AGG | 9  | 1 |
| GAATACTTAAATAAAAAAGC  | 7390  | AGG | 9  | 1 |
| GATAGCGAAGATGGGAGAAA  | 22887 | AGG | 9  | 1 |
| GGTGGCGTTATTGAGGGATT  | 33115 | CGG | 9  | 1 |
| CTTCAATAACTAGCCAATTA  | 35172 | GGG | 9  | 1 |
| TACCTACAAGATACCTAAAA  | 36490 | AGG | 9  | 1 |
| AGTTAGTACAGAAGATTTTG  | 37174 | AGG | 9  | 1 |
| ATGCTGGAAATATCCAAGTA  | 37487 | TGG | 9  | 1 |
| TTCAACCCAGATGGTTGGTA  | 38245 | TGG | 9  | 1 |
| AGATAAAGCGTTATTATATT  | 5591  | GGG | 9  | 2 |
| AGATTGGGGGTGAATAATTA  | 6814  | TGG | 9  | 2 |
| CGATGCGATTTTCATCAGCTT | 26413 | GGG | 9  | 2 |
| GACTCAGACGGCAACGGTGG  | 33187 | CGG | 9  | 2 |

|                       |       |     |   |   |
|-----------------------|-------|-----|---|---|
| CATATGGCAAAAAGTTAAGTA | 21294 | CGG | 9 | 3 |
| GGTATTGATAAAAATTATTGA | 6774  | AGG | 9 | 4 |
| TTTATCTATAAATAATGAAT  | 28837 | TGG | 9 | 4 |
| AACCTGAACGATTAAGGAGG  | 16258 | GGG | 9 | 5 |
| GTTGAAGGCGCAGAAGAGAA  | 19973 | AGG | 9 | 5 |
| ATCTCCAGCAAAAGCAATCA  | 36028 | TGG | 9 | 7 |
| TTAATAACCTAGTAAGGTTA  | 6263  | GGG | 9 | 8 |
| ATTTTCGGAAAACGGATTAT  | 7203  | CGG | 8 | 1 |
| GCAGGGTTCCAAAATGGCTG  | 21629 | TGG | 8 | 1 |
| TATGTAAACTAATAGATCAA  | 22700 | GGG | 8 | 1 |
| TAACCAATTAAGCAAAATA   | 32013 | TGG | 8 | 1 |
| TTTATGTTATAGCTAGCCTT  | 39803 | CGG | 8 | 1 |
| AAACAAAACGGTATAAACAT  | 2288  | CGG | 8 | 2 |
| GAGGAGGTAGAACATGACTG  | 3805  | AGG | 8 | 2 |
| TTACTTGAGTTTTCCCCTTG  | 13940 | TGG | 8 | 2 |
| TGATTTCACTACTGAAAACG  | 23045 | AGG | 8 | 2 |
| TTGCTAGTATCTTTTGAATA  | 34807 | TGG | 8 | 2 |
| TACACGATTACTCAAAAATA  | 23259 | AGG | 8 | 3 |
| GTTAAAGCTAATGATAAGGA  | 27469 | TGG | 8 | 3 |
| ACTTTATTTTTAAAAGATAT  | 34509 | TGG | 8 | 3 |
| GAAAGATTACGGCGAGAAAA  | 24217 | TGG | 8 | 4 |
| CACTGGTGAAAAATATCCAG  | 33857 | AGG | 7 | 1 |
| CTGTGGTTTTGTTGGTTGTA  | 40162 | GGG | 7 | 1 |
| CAGGTGGACAGTTGCGTATA  | 22390 | TGG | 7 | 2 |
| TGTAAACTAATAGATCAAGG  | 22702 | GGG | 7 | 2 |
| TGGCTAGTTATTGAAGTATG  | 35195 | TGG | 7 | 2 |
| TTAAAAAGCGTTTTAGCGCT  | 1902  | TGG | 7 | 3 |
| CTGGATTTAACTAGAATAAC  | 25430 | TGG | 7 | 3 |
| CTTACCTAAAAATAAATATC  | 37539 | CGG | 7 | 3 |
| GATCCTGGAGCAGTAGGAAA  | 38758 | CGG | 7 | 3 |
| AATGGCGCTTATTACTTTCA  | 10164 | CGG | 7 | 4 |
| GAAACGAGAATAAAAAATGA  | 36266 | TGG | 7 | 4 |
| CTTAGTCATGAAATGGTAGG  | 3576  | AGG | 6 | 1 |
| TGCTAACGGGAACGAGATTA  | 20155 | TGG | 6 | 1 |
| TCAGTTTGGGAGTCAATTAT  | 25985 | CGG | 6 | 1 |
| GTAGATGCATCTAAATTCGA  | 28118 | GGG | 6 | 1 |
| AATGCGTATAGATACATTGA  | 30254 | TGG | 6 | 1 |
| TTTTTGGCAGTAAATTTGAG  | 7568  | GGG | 6 | 2 |
| AGATGAAGGTAAGTATTTTA  | 4979  | CGG | 6 | 3 |
| CCAGCAGTCGCTCAAATTAT  | 25292 | CGG | 6 | 3 |
| AGGGTACGCGAAGGGCAAAA  | 18906 | AGG | 6 | 4 |
| GTAAGTGGAECTTATCCAGG  | 33097 | TGG | 6 | 5 |
| ACTTCAATACTAGCCAATT   | 35173 | AGG | 6 | 5 |
| TATGAAAATATAAGGGAGTG  | 12625 | TGG | 5 | 1 |
| GGACTGTTAGGGTACGCGAA  | 18898 | GGG | 5 | 1 |

|                       |       |     |   |   |
|-----------------------|-------|-----|---|---|
| AAATTCCTTGAATCGAAAGG  | 23582 | AGG | 5 | 1 |
| AAAGGTTATGGTGATTTTGA  | 28343 | TGG | 5 | 1 |
| ACAACGACTTTTGCAGAAG   | 28366 | CGG | 5 | 1 |
| TTTGATTTAGGTAAAACATC  | 33274 | AGG | 5 | 1 |
| AAAGCCTACAGCTAGTGAAG  | 34408 | TGG | 5 | 1 |
| GAATCAAGATTTTAGGTTGG  | 7467  | AGG | 5 | 2 |
| GGGAAAATATTTTTTTTCAAC | 10400 | AGG | 5 | 2 |
| TTAGCTGACTTACAAGAAGG  | 22221 | TGG | 5 | 2 |
| CAAGTATTCATGCAAGTTTT  | 25730 | AGG | 5 | 2 |
| TTAAAAAGTCTACAGGGTGT  | 27743 | AGG | 5 | 2 |
| CTACTATTGGCGAAAAAATA  | 27951 | AGG | 5 | 2 |
| CAACATCTCAAGAAGGGAAA  | 38034 | TGG | 5 | 2 |
| AATGTTGAAAGGAGAGAAAA  | 5843  | AGG | 5 | 3 |
| TACTTTGCTGGTGTCTGACTG | 15819 | GGG | 5 | 3 |
| ATACTCATCGTCATTTAGAT  | 18364 | GGG | 5 | 3 |
| GAAAAATTCGGCGAAAAAGT  | 22617 | CGG | 5 | 3 |
| AATAATGGCAGTACTTAATG  | 24355 | CGG | 5 | 3 |
| ATGTCTTACTTAACAAAAAA  | 6219  | AGG | 4 | 1 |
| AAACGATTCAAAGGCGCTCA  | 8769  | CGG | 4 | 1 |
| TTAAAGGTGATGACGGCGAA  | 21601 | TGG | 4 | 1 |
| AAATGGAACAAGTGATATTT  | 24175 | GGG | 4 | 1 |
| GGAGGTAGTAGCTTAGGTAA  | 26468 | AGG | 4 | 1 |
| GGAAGTTTCAACTTATTATA  | 26735 | AGG | 4 | 1 |
| AAATTCGAGGGATTAGGCAA  | 28130 | AGG | 4 | 1 |
| ATGGAGTTTATTCGAGGGAA  | 31495 | AGG | 4 | 1 |
| TTTTAGTCGTTTTTTTTATTT | 37834 | TGG | 4 | 1 |
| GATAATCCAACATCTCAAGA  | 38027 | AGG | 4 | 1 |
| GAAAACGGATTATCGGCAAA  | 7210  | CGG | 4 | 2 |
| TACTTTGCCGTTATTACAAG  | 23069 | GGG | 4 | 2 |
| GGTGTGAATAATAACTTTAA  | 30737 | AGG | 4 | 2 |
| GGCAACGGAATAGGTTCCGGA | 34655 | CGG | 4 | 2 |
| AGCATAGGTGGCGCAATCTT  | 24755 | CGG | 4 | 3 |
| GCAGTTTCCGGTGCGATTCA  | 25625 | AGG | 4 | 3 |
| GATGTTATTAATAAATAACTT | 39082 | AGG | 4 | 3 |
| TCTCTAAACGCTTTCGGTAA  | 31039 | CGG | 4 | 4 |
| ACAGAATTGGAAATTATGAA  | 5442  | AGG | 3 | 1 |
| ATATCAGTATTTTGATGATG  | 9319  | TGG | 3 | 1 |
| AGAGATGCAGTTATTAAGT   | 12595 | GGG | 3 | 1 |
| TACACTTTTTAAAAATCGGA  | 14710 | AGG | 3 | 1 |
| AAACCTGAACGATTAAGGAG  | 16257 | GGG | 3 | 1 |
| TAAAGTGAGGTAATAAAAATA | 19522 | TGG | 3 | 1 |
| TTCTCAGAAGATAGCGAAGA  | 22878 | TGG | 3 | 1 |
| AGAAAATTCCTTGAATCGAA  | 23579 | AGG | 3 | 1 |
| GTAATAACGACCCTGAAAAA  | 27293 | TGG | 3 | 1 |
| CCAGAAGCTAACCTAAAAT   | 28568 | AGG | 3 | 1 |



|                       |       |     |   |   |
|-----------------------|-------|-----|---|---|
| AGTTCCAATAGGTAAAGAAG  | 29107 | CGG | 3 | 1 |
| AACAGATGCGCCAGAAAAGA  | 32394 | CGG | 3 | 1 |
| TTGTTGACGGTGGCGCAA    | 33019 | TGG | 3 | 1 |
| CAGCTAGTGAAGTGGTGGAG  | 34416 | TGG | 3 | 1 |
| CTTTATTTTTAAAAGATATT  | 34510 | GGG | 3 | 1 |
| CCCCATGTATGAGATTTTT   | 35629 | CGG | 3 | 1 |
| AGTAGATTTAAAGGTGCGAA  | 36764 | AGG | 3 | 1 |
| CAAAAAATCAAGCAGAAAA   | 38198 | TGG | 3 | 1 |
| CGTTTTTTTGGGGCAAAAA   | 40234 | AGG | 3 | 1 |
| CAAAAAGCTGAAGAAAATAA  | 5073  | CGG | 3 | 2 |
| TTTTCTTTTCGTCGCTGAAA  | 8710  | TGG | 3 | 2 |
| GCTAACCTCCTTCGATTCA   | 23571 | AGG | 3 | 2 |
| CCGCTAAAATGGCGGTAAA   | 23997 | GGG | 3 | 2 |
| GGTGTTATCGGTATTTTAGG  | 25313 | TGG | 3 | 2 |
| ATTTTCAATAAGAAAAACAA  | 31190 | CGG | 3 | 2 |
| GGAAAAACGGAAAACCGAAA  | 7246  | AGG | 3 | 3 |
| CTTTTTGGCAGTAAATTTGA  | 7567  | GGG | 3 | 3 |
| GCAAACGGTTTTTCGAAAA   | 7225  | CGG | 2 | 1 |
| CTGCAAGTTTTTGGATAAAT  | 8536  | AGG | 2 | 1 |
| TTTCTTTTCGTCGCTGAAAT  | 8709  | GGG | 2 | 1 |
| AAGAGATGCAGTTATTAAG   | 12594 | TGG | 2 | 1 |
| CGTGTGGCTCGTAAAGAAGC  | 18237 | AGG | 2 | 1 |
| GATGAAGAGTTAGATCCAAA  | 20060 | CGG | 2 | 1 |
| AAACAATTTATTTGAGTATG  | 21190 | AGG | 2 | 1 |
| AATAGTACGAGGCGGTAAAA  | 22271 | CGG | 2 | 1 |
| TTGGGAGACTATTA AAACTA | 25924 | CGG | 2 | 1 |
| TTCGCGAGTAAAGTAGCTGA  | 26231 | TGG | 2 | 1 |
| TCATTCGTAAGTGGACACGG  | 26447 | TGG | 2 | 1 |
| TGCTGGACGTTTTTATTTAA  | 27036 | GGG | 2 | 1 |
| TCAGGAGAAGTTTATTATAA  | 27385 | CGG | 2 | 1 |
| CCTATTTTAGGGTTAGCTTC  | 28552 | TGG | 2 | 1 |
| CTATAACTAAAATTATGGGG  | 33323 | TGG | 2 | 1 |
| TATCTTTTAAAAATAAAGTT  | 34489 | AGG | 2 | 1 |
| ACCCGAAAAAATCTCATACA  | 35643 | TGG | 2 | 1 |
| CCCGAAAAAATCTCATACAT  | 35644 | GGG | 2 | 1 |
| AGTCGTTTAAAATTATTCAA  | 37792 | TGG | 2 | 1 |
| AAACCAACGTTTAATGATTG  | 4199  | GGG | 2 | 2 |
| ACAAAGCGATTTTACAATTT  | 22960 | TGG | 2 | 2 |
| GATTCCAGCAGATGGAAATT  | 24065 | AGG | 2 | 2 |
| AATGCGGTTGGTGTATTAGG  | 24371 | TGG | 2 | 2 |
| GCTCTTAAAATGGTTGAAGA  | 24470 | TGG | 2 | 2 |
| GAACAAGTAGGACAATCACA  | 25094 | AGG | 2 | 2 |
| TATACCTTTATTAAGGTTA   | 28331 | TGG | 2 | 2 |
| CGGTGCTAGCTTCGTAAGAA  | 36052 | AGG | 2 | 2 |
| AAGGGCAGATTATTTGAAAA  | 40253 | AGG | 2 | 2 |

|                       |       |     |   |   |
|-----------------------|-------|-----|---|---|
| AATATTCAAGAAAAAGAAAA  | 1835  | TGG | 1 | 1 |
| TGAAGCATTTCAAAGAAAAT  | 1938  | AGG | 1 | 1 |
| TAGGTTATTAATTGAAATTT  | 6291  | CGG | 1 | 1 |
| CTACCTGTATTACGAAAGCG  | 8894  | TGG | 1 | 1 |
| AAGCATAGAGGTTCGAAAAAG | 10878 | TGG | 1 | 1 |
| CTCACAGTCATATCTAAGGA  | 11271 | AGG | 1 | 1 |
| ATTTTATCGGATTTTAAAAA  | 19574 | CGG | 1 | 1 |
| GAAATGGAAGCTAAGAAAAT  | 19787 | TGG | 1 | 1 |
| CATAGAGGTGGTTAAATATG  | 21706 | TGG | 1 | 1 |
| ACAATAGTGGTTTTTTCAAG  | 23107 | AGG | 1 | 1 |
| CCCCTAAAATGGCGGTAA    | 23996 | AGG | 1 | 1 |
| GCTGCAGGAAGATTTGGCGA  | 24791 | CGG | 1 | 1 |
| TGTCCATAGCTTCCAAAAT   | 24879 | TGG | 1 | 1 |
| TTGGTATTCTTGTTTATTTA  | 25545 | TGG | 1 | 1 |
| TTGGAGTGTGGCTGAAAAAA  | 26137 | TGG | 1 | 1 |
| TGCGTGATTTAATTAATCA   | 26673 | AGG | 1 | 1 |
| AGTAGATGCATCTAAATTCG  | 28117 | AGG | 1 | 1 |
| CAGGCATTCTTTACACAAAA  | 31855 | CGG | 1 | 1 |
| TTATCCAGGTGGCGTTATTG  | 33108 | AGG | 1 | 1 |
| CTATTTTTGGTATTTAAAGG  | 34229 | AGG | 1 | 1 |
| GTTTTAACTTCTTTAAATTG  | 34900 | CGG | 1 | 1 |
| CGGATATTTATTTTTAGGTA  | 37522 | AGG | 1 | 1 |
| ATGAACGACACAAATGATTT  | 38150 | AGG | 1 | 1 |
| AATTTTGCTACATTAATTAT  | 39660 | AGG | 1 | 1 |
| TAGCTATAACATAAAAAAAT  | 39779 | AGG | 1 | 1 |

## Normalized Reads Sonication

21894.00185  
19537.69226  
17438.28104  
13726.91952  
12247.64208  
11105.76113  
9988.22839  
9501.761269  
7950.433025  
7579.247183  
7529.060075  
7348.684626  
7319.367404  
7279.615239  
7102.221202  
6980.977098  
6789.172902  
6581.964741  
6514.882962  
6286.308013  
5979.222537  
5731.268407  
5676.60918  
5673.627768  
5585.1792  
5285.547256  
5175.234997  
5070.885564  
5018.213945  
4938.212713  
4868.646424  
4754.855851  
4731.004552  
4668.891794  
4572.989696  
4287.271009  
4182.424673  
4021.428405  
3973.725806  
3919.563481  
3802.791496  
3782.915414  
3779.437099  
3707.883202

3645.273542  
3592.601923  
3589.620511  
3584.154588  
3550.86215  
3515.582103  
3478.314449  
3473.345428  
3347.132304  
3164.769246  
3163.775442  
3115.07904  
3058.929106  
3044.022045  
2995.822544  
2943.647828  
2936.194297  
2880.044363  
2869.112518  
2847.745729  
2740.414883  
2738.924177  
2666.376476  
2627.618115  
2595.319481  
2590.35046  
2584.884537  
2550.598295  
2486.994831  
2470.597063  
2413.453325  
2381.651593  
2295.687536  
2288.234005  
2276.805258  
2276.805258  
2245.500428  
2191.835005  
2179.909355  
2144.132407  
2076.553726  
2064.131174  
2062.640468  
2059.162154  
2056.677643

2054.193133  
2032.329442  
2026.863519  
2004.999829  
1994.564885  
1988.105158  
1985.620648  
1981.148529  
1957.29723  
1944.377777  
1925.495498  
1924.501694  
1914.563653  
1835.059323  
1834.065519  
1815.680142  
1814.686338  
1805.245199  
1798.785472  
1796.300962  
1795.80406  
1790.338137  
1770.958956  
1736.175812  
1733.691302  
1723.256358  
1716.796631  
1710.833807  
1697.417451  
1692.945332  
1676.050662  
1662.634306  
1640.770616  
1634.807791  
1627.35426  
1607.975079  
1606.484373  
1598.53394  
1593.068017  
1574.682641  
1569.71362  
1560.272481  
1545.862321  
1541.390203  
1539.899497

1535.92428  
1526.483141  
1500.644234  
1495.675213  
1492.693801  
1485.737172  
1475.302228  
1462.879677  
1454.929244  
1454.432342  
1454.432342  
1449.463321  
1448.469517  
1440.519084  
1421.636805  
1400.766919  
1400.270017  
1395.300996  
1390.828877  
1389.338171  
1385.362955  
1377.412522  
1372.443501  
1366.977578  
1365.486872  
1360.020949  
1354.555027  
1346.107692  
1337.163454  
1330.703728  
1320.765686  
1306.355526  
1305.361722  
1302.877212  
1288.963954  
1264.615753  
1263.621949  
1252.690104  
1250.702495  
1250.205593  
1241.758258  
1237.28614  
1223.869784  
1218.403861  
1203.993701

1175.173382  
1168.713655  
1163.247732  
1160.26632  
1155.297299  
1134.427412  
1128.464588  
1124.489371  
1123.495567  
1122.998665  
1122.004861  
1121.011057  
1117.532742  
1108.091603  
1105.110191  
1098.650464  
1094.675247  
1090.700031  
1086.724814  
1067.345634  
1054.42618  
1053.432376  
1045.978845  
1025.108958  
1022.127546  
1019.146133  
1016.661623  
1012.189505  
1010.698798  
1010.698798  
999.2700509  
980.3877724  
978.4001642  
974.4249477  
972.4373394  
966.9714167  
962.4992981  
960.0147878  
956.0395713  
956.0395713  
951.5674527  
950.0767465  
949.0829424  
944.6108238  
944.1139218

938.151097  
937.6541949  
937.1572929  
927.2192516  
925.7285454  
912.8090917  
912.3121897  
909.3307773  
906.8462669  
905.8524628  
903.8648546  
903.3679525  
898.3989319  
897.9020298  
897.9020298  
894.9206174  
888.9577926  
886.9701844  
883.4918699  
882.4980658  
876.535241  
867.0941018  
859.1436688  
858.6467667  
853.180844  
851.6901378  
850.6963337  
849.2056275  
847.2180193  
842.2489986  
832.8078594  
826.3481326  
825.3543284  
824.8574264  
821.876014  
819.8884057  
819.8884057  
814.422483  
810.4472665  
809.4534624  
795.5402046  
795.0433025  
794.5464005  
793.0556943  
793.0556943



789.0804778  
784.1114571  
783.6145551  
781.6269468  
780.6331427  
779.6393385  
777.1548282  
775.16722  
772.6827096  
770.1981993  
769.2043952  
769.2043952  
768.7074931  
761.7508642  
760.7570601  
759.2663539  
755.2911374  
751.812823  
746.3469003  
746.3469003  
745.3530961  
743.8623899  
740.8809775  
739.8871734  
734.9181528  
732.4336425  
731.9367404  
726.9677198  
720.0110909  
717.0296785  
713.054462  
713.054462  
711.5637558  
711.0668537  
709.0792454  
707.5885393  
707.5885393  
707.5885393  
705.1040289  
701.6257145  
700.6319104  
699.6381062  
695.1659876  
693.1783794  
691.6876732

691.1907711  
690.196967  
689.2031629  
687.2155546  
685.2279464  
683.2403381  
682.246534  
681.7496319  
675.7868072  
674.296101  
671.8115906  
670.3208844  
666.84257  
665.8487659  
663.8611576  
663.3642555  
662.8673535  
660.8797452  
659.389039  
656.9045287  
651.438606  
650.9417039  
645.9726833  
645.9726833  
643.488173  
642.9912709  
640.0098585  
639.0160544  
639.0160544  
636.5315441  
636.5315441  
636.034642  
633.5501317  
631.5625234  
631.0656214  
631.0656214  
629.0780131  
626.0966007  
625.1027966  
618.6430698  
617.1523636  
616.6554615  
612.680245  
612.1833429  
612.1833429

611.6864409  
608.7050285  
607.2143223  
606.7174202  
606.7174202  
601.7483996  
601.7483996  
600.2576934  
594.7917707  
592.3072604  
592.3072604  
589.8227501  
589.8227501  
588.3320439  
588.3320439  
587.8351418  
587.8351418  
587.3382397  
586.3444356  
585.8475336  
582.3692191  
581.872317  
581.375415  
579.3878067  
579.3878067  
578.8909047  
577.8971005  
572.4311778  
567.4621572  
565.971451  
562.9900386  
561.9962345  
560.5055283  
560.5055283  
560.0086262  
559.5117242  
559.5117242  
558.51792  
556.0334097  
554.5427035  
554.0458015  
553.0519973  
551.5612911  
551.0643891  
549.0767808

549.0767808  
548.0829767  
547.5860746  
547.5860746  
547.0891726  
543.6108581  
543.6108581  
543.6108581  
541.1263478  
539.1387395  
538.1449354  
538.1449354  
532.1821106  
531.1883065  
529.6976003  
527.7099921  
526.7161879  
526.7161879  
523.2378735  
522.7409714  
521.7471673  
521.2502652  
521.2502652  
521.2502652  
520.2564611  
520.2564611  
514.7905384  
512.8029301  
511.3122239  
510.8153219  
508.3308116  
507.8339095  
504.8524971  
504.8524971  
503.3617909  
502.8648889  
502.3679868  
500.3803785  
498.3927703  
497.3989661  
496.405162  
495.90826  
490.4423372  
490.4423372  
488.454729

486.4671207  
485.4733166  
484.9764145  
484.4795125  
478.0197856  
476.5290795  
476.0321774  
472.0569609  
470.0693526  
468.0817444  
461.6220175  
460.1313113  
460.1313113  
457.149899  
457.149899  
454.6653886  
454.1684866  
454.1684866  
453.6715845  
453.6715845  
453.1746824  
451.1870742  
444.7273474  
444.7273474  
444.2304453  
444.2304453  
444.2304453  
443.7335432  
442.7397391  
442.242837  
438.7645226  
438.7645226  
436.7769143  
435.7831102  
430.8140896  
429.3233834  
428.3295792  
428.3295792  
426.838873  
424.8512648  
424.3543627  
422.8636565  
422.8636565  
422.3667545  
419.3853421

418.391538  
417.8946359  
416.4039297  
416.4039297  
416.4039297  
414.4163214  
411.9318111  
410.4411049  
409.9442029  
409.9442029  
409.4473008  
408.4534967  
406.4658884  
404.4782802  
404.4782802  
404.4782802  
403.484476  
403.484476  
402.987574  
402.987574  
401.9937698  
401.9937698  
399.5092595  
398.5154554  
398.0185533  
397.5216513  
397.0247492  
396.5278471  
395.534043  
394.5402389  
393.5464348  
393.0495327  
393.0495327  
391.5588265  
391.5588265  
391.0619244  
390.5650224  
387.58361  
387.58361  
386.5898059  
386.0929038  
386.0929038  
385.0990997  
384.6021976  
384.1052955

383.6083935  
383.1114914  
381.1238832  
380.6269811  
380.130079  
379.1362749  
378.6393728  
378.6393728  
378.1424708  
376.6517646  
376.1548625  
374.1672543  
373.1734501  
372.6765481  
370.6889398  
370.1920377  
369.6951357  
369.6951357  
369.1982336  
367.7075274  
366.7137233  
364.726115  
361.7447027  
361.7447027  
360.7508985  
360.7508985  
360.2539965  
359.7570944  
356.775682  
355.7818779  
354.2911717  
354.2911717  
354.2911717  
353.7942696  
352.3035634  
350.3159552  
350.3159552  
349.322151  
348.825249  
347.8314449  
346.8376407  
346.3407387  
346.3407387  
344.3531304  
342.8624242

342.8624242  
341.371718  
341.371718  
340.3779139  
340.3779139  
339.3841098  
338.8872077  
337.8934036  
337.3965015  
336.4026974  
335.4088933  
335.4088933  
333.9181871  
333.421285  
333.421285  
332.9243829  
331.4336767  
328.4522644  
327.9553623  
326.9615582  
326.4646561  
325.967754  
325.967754  
325.470852  
325.470852  
324.9739499  
324.9739499  
324.9739499  
324.4770478  
323.4832437  
322.4894396  
320.5018313  
320.0049293  
319.5080272  
319.0111251  
319.0111251  
317.5204189  
317.5204189  
316.5266148  
316.0297128  
316.0297128  
315.0359086  
314.5390066  
313.5452024  
313.5452024



313.0483004  
312.5513983  
312.0544962  
312.0544962  
311.0606921  
310.5637901  
310.066888  
309.5699859  
308.5761818  
308.5761818  
307.0854756  
307.0854756  
305.5947694  
305.0978673  
303.6071612  
303.6071612  
303.1102591  
303.1102591  
302.116455  
301.6195529  
301.6195529  
301.6195529  
301.1226508  
300.6257488  
299.6319446  
299.6319446  
298.6381405  
297.1474343  
294.662924  
293.6691199  
293.6691199  
292.6753157  
291.6815116  
291.1846096  
291.1846096  
290.1908054  
289.6939034  
288.7000992  
287.7062951  
287.209393  
287.209393  
286.2155889  
286.2155889  
284.7248827  
284.2279807

284.2279807  
284.2279807  
283.7310786  
282.7372745  
282.7372745  
282.7372745  
282.2403724  
281.7434703  
280.7496662  
279.25896  
277.7682538  
277.2713518  
275.7806456  
275.7806456  
275.2837435  
274.2899394  
273.7930373  
273.2961352  
273.2961352  
273.2961352  
272.7992332  
272.7992332  
272.7992332  
272.7992332  
271.8054291  
271.8054291  
271.308527  
270.8116249  
270.8116249  
270.3147229  
269.3209187  
268.8240167  
268.3271146  
266.3395063  
266.3395063  
266.3395063  
264.8488002  
263.358094  
260.8735836  
259.8797795  
258.8859754  
258.8859754  
256.8983671  
256.4014651  
256.4014651

254.4138568  
253.9169547  
253.4200527  
253.4200527  
252.4262486  
252.4262486  
251.4324444  
250.9355424  
250.4386403  
249.9417382  
249.4448362  
248.9479341  
    247.95413  
    247.95413  
246.4634238  
245.4696197  
245.4696197  
244.9727176  
244.4758155  
243.9789135  
243.4820114  
242.4882073  
241.9913052  
241.9913052  
241.4944031  
241.4944031  
240.9975011  
    240.500599  
    240.500599  
    240.003697  
    240.003697  
239.0098928  
237.0222846  
236.5253825  
236.5253825  
234.0408722  
233.0470681  
    232.550166  
231.5563619  
231.0594598  
230.5625577  
230.0656557  
230.0656557  
229.5687536  
229.5687536

228.0780474  
228.0780474  
228.0780474  
227.5811453  
227.5811453  
227.0842433  
227.0842433  
226.0904392  
226.0904392  
225.5935371  
225.5935371  
225.096635  
224.599733  
224.599733  
224.1028309  
223.1090268  
222.6121247  
222.6121247  
222.6121247  
222.6121247  
222.1152226  
221.6183206  
221.6183206  
221.1214185  
221.1214185  
220.1276144  
219.1338103  
218.6369082  
218.1400061  
217.6431041  
217.146202  
217.146202  
217.146202  
216.6492999  
215.6554958  
215.6554958  
215.1585937  
212.6740834  
212.6740834  
212.1771814  
212.1771814  
212.1771814  
211.6802793  
211.6802793  
211.6802793

210.6864752  
210.6864752  
209.692671  
207.7050628  
207.2081607  
206.7112587  
206.7112587  
206.7112587  
205.7174545  
205.7174545  
205.7174545  
205.2205525  
205.2205525  
205.2205525  
205.2205525  
204.7236504  
203.7298463  
203.2329442  
203.2329442  
202.7360421  
202.2391401  
202.2391401  
202.2391401  
202.2391401  
201.742238  
201.245336  
201.245336  
201.245336  
200.2515318  
199.7546298  
199.7546298  
199.2577277  
198.7608256  
198.7608256  
198.2639236  
197.7670215  
197.7670215  
197.2701194  
197.2701194  
197.2701194  
196.7732174  
196.7732174  
196.2763153  
195.7794132  
195.7794132

195.2825112  
194.7856091  
194.7856091  
191.8041967  
191.8041967  
191.3072947  
190.8103926  
190.3134905  
189.3196864  
189.3196864  
189.3196864  
187.8289802  
186.8351761  
184.8475678  
183.8537637  
183.8537637  
183.8537637  
183.8537637  
183.3568616  
183.3568616  
182.3630575  
181.8661555  
181.8661555  
181.8661555  
181.3692534  
181.3692534  
181.3692534  
180.8723513  
180.8723513  
180.3754493  
179.8785472  
179.3816451  
179.3816451  
178.387841  
177.8909389  
177.8909389  
176.8971348  
176.8971348  
176.8971348  
176.4002327  
175.9033307  
174.9095266  
174.9095266  
174.9095266  
174.9095266

174.9095266  
174.4126245  
173.9157224  
173.9157224  
173.9157224  
173.4188204  
173.4188204  
173.4188204  
172.9219183  
171.9281142  
171.9281142  
171.4312121  
171.4312121  
    170.93431  
    170.437408  
169.9405059  
169.9405059  
169.9405059  
169.4436039  
168.4497997  
167.4559956  
167.4559956  
166.9590935  
166.9590935  
166.4621915  
165.9652894  
165.9652894  
165.4683873  
165.4683873  
164.9714853  
164.9714853  
164.9714853  
163.4807791  
163.4807791  
163.4807791  
    162.486975  
    162.486975  
161.9900729  
161.9900729  
161.9900729  
161.9900729  
161.4931708  
159.5055626  
159.5055626  
159.0086605

159.0086605  
158.5117584  
158.0148564  
157.5179543  
157.5179543  
157.0210522  
157.0210522  
156.5241502  
156.0272481  
155.5303461  
155.5303461  
155.5303461  
155.5303461  
155.033444  
155.033444  
155.033444  
154.5365419  
154.5365419  
154.5365419  
154.0396399  
154.0396399  
153.0458357  
153.0458357  
153.0458357  
153.0458357  
152.5489337  
152.0520316  
151.5551295  
151.5551295  
151.0582275  
151.0582275  
151.0582275  
150.5613254  
150.5613254  
150.5613254  
150.0644234  
150.0644234  
149.5675213  
149.0706192  
149.0706192  
149.0706192  
148.5737172  
148.5737172  
148.0768151  
147.579913



147.083011  
146.5861089  
146.0892068  
145.5923048  
145.5923048  
145.5923048  
145.0954027  
144.5985006  
144.5985006  
144.1015986  
144.1015986  
143.6046965  
143.1077945  
142.6108924  
142.6108924  
142.1139903  
142.1139903  
142.1139903  
142.1139903  
142.1139903  
141.6170883  
141.6170883  
141.1201862  
141.1201862  
140.6232841  
140.6232841  
139.62948  
139.62948  
139.62948  
139.1325779  
138.6356759  
138.6356759  
138.1387738  
137.6418718  
137.1449697  
137.1449697  
137.1449697  
137.1449697  
136.6480676  
136.6480676  
136.6480676  
136.6480676  
136.6480676  
136.1511656  
135.6542635

135.6542635  
135.6542635  
135.6542635  
135.1573614  
135.1573614  
134.6604594  
134.6604594  
133.6666552  
133.6666552  
133.6666552  
132.175949  
131.1821449  
131.1821449  
130.6852429  
130.6852429  
130.1883408  
130.1883408  
129.6914387  
129.1945367  
129.1945367  
129.1945367  
129.1945367  
128.6976346  
128.6976346  
128.6976346  
128.6976346  
128.2007325  
127.7038305  
127.7038305  
127.7038305  
127.2069284  
127.2069284  
126.7100263  
126.2131243  
126.2131243  
125.7162222  
125.2193201  
125.2193201  
124.225516  
124.225516  
123.728614  
123.728614  
123.728614  
123.728614  
123.2317119

122.7348098  
122.7348098  
122.7348098  
122.7348098  
122.7348098  
122.7348098  
122.2379078  
122.2379078  
122.2379078  
121.2441036  
120.7472016  
120.7472016  
120.7472016  
119.7533974  
119.7533974  
119.2564954  
119.2564954  
118.2626913  
117.2688871  
116.7719851  
115.7781809  
115.7781809  
115.7781809  
115.7781809  
115.7781809  
115.2812789  
115.2812789  
115.2812789  
114.7843768  
114.7843768  
114.7843768  
114.7843768  
114.7843768  
113.7905727  
113.7905727  
113.2936706  
113.2936706  
112.7967685  
112.7967685  
112.7967685  
112.2998665  
111.8029644  
110.8091603  
110.8091603  
110.3122582

110.3122582  
109.3184541  
109.3184541  
108.821552  
108.821552  
108.821552  
108.32465  
108.32465  
107.8277479  
107.8277479  
107.8277479  
107.3308458  
107.3308458  
107.3308458  
107.3308458  
106.8339438  
106.8339438  
106.3370417  
106.3370417  
105.8401396  
105.8401396  
105.8401396  
105.3432376  
105.3432376  
105.3432376  
105.3432376  
104.8463355  
104.8463355  
104.3494335  
104.3494335  
104.3494335  
104.3494335  
103.8525314  
103.8525314  
103.8525314  
103.3556293  
102.8587273  
101.8649231  
101.8649231  
101.3680211  
100.871119  
100.871119  
100.871119  
100.3742169  
100.3742169

100.3742169  
99.87731488  
99.87731488  
99.38041282  
99.38041282  
97.88970662  
97.88970662  
97.39280456  
97.39280456  
96.8959025  
96.8959025  
96.39900043  
96.39900043  
95.90209837  
95.90209837  
95.4051963  
94.90829424  
94.90829424  
94.90829424  
94.90829424  
94.41139218  
94.41139218  
94.41139218  
94.41139218  
94.41139218  
93.91449011  
93.91449011  
93.91449011  
93.41758805  
92.92068598  
92.92068598  
92.92068598  
92.42378392  
92.42378392  
92.42378392  
92.42378392  
92.42378392  
92.42378392  
92.42378392  
91.92688186  
91.92688186  
91.42997979  
91.42997979  
90.43617566  
89.9392736  
89.9392736

89.9392736  
89.44237153  
89.44237153  
88.94546947  
88.44856741  
88.44856741  
88.44856741  
87.95166534  
87.95166534  
87.95166534  
87.95166534  
87.45476328  
87.45476328  
87.45476328  
87.45476328  
86.95786121  
86.95786121  
86.95786121  
86.95786121  
86.46095915  
85.96405709  
85.96405709  
85.96405709  
85.46715502  
85.46715502  
85.46715502  
84.97025296  
84.97025296  
84.97025296  
84.97025296  
84.97025296  
84.97025296  
84.97025296  
84.47335089  
83.97644883  
83.47954677  
83.47954677  
82.48574264  
82.48574264  
82.48574264  
82.48574264  
81.98884057  
81.98884057  
81.49193851

81.49193851  
81.49193851  
80.99503645  
80.99503645  
80.99503645  
80.99503645  
80.99503645  
80.49813438  
80.49813438  
80.00123232  
80.00123232  
80.00123232  
80.00123232  
80.00123232  
79.50433025  
79.50433025  
79.00742819  
79.00742819  
79.00742819  
79.00742819  
78.51052612  
78.01362406  
78.01362406  
78.01362406  
77.516722  
77.516722  
76.52291787  
76.52291787  
76.52291787  
76.0260158  
76.0260158  
76.0260158  
76.0260158  
76.0260158  
76.0260158  
75.52911374  
75.52911374  
75.03221168  
75.03221168  
74.53530961  
74.53530961  
73.54150548  
73.54150548  
73.04460342

73.04460342  
72.54770136  
72.54770136  
72.54770136  
72.05079929  
72.05079929  
72.05079929  
72.05079929  
72.05079929  
71.55389723  
71.55389723  
71.55389723  
71.55389723  
71.55389723  
71.55389723  
71.05699516  
71.05699516  
71.05699516  
71.05699516  
71.05699516  
70.5600931  
70.5600931  
70.5600931  
70.5600931  
70.06319104  
70.06319104  
70.06319104  
69.56628897  
69.56628897  
69.56628897  
69.56628897  
69.56628897  
69.56628897  
69.56628897  
69.56628897  
69.56628897  
68.57248484  
68.57248484  
68.57248484  
68.07558278  
67.57868072  
67.57868072  
67.57868072  
67.08177865  
67.08177865  
67.08177865



66.58487659  
66.58487659  
66.58487659  
66.08797452  
66.08797452  
66.08797452  
66.08797452  
66.08797452  
66.08797452  
65.59107246  
65.59107246  
65.59107246  
65.09417039  
65.09417039  
65.09417039  
64.59726833  
64.59726833  
64.59726833  
64.10036627  
64.10036627  
63.6034642  
63.6034642  
63.6034642  
63.10656214  
63.10656214  
62.60966007  
62.11275801  
61.61585595  
61.61585595  
61.61585595  
61.61585595  
61.61585595  
61.61585595  
61.61585595  
61.61585595  
61.11895388  
61.11895388  
61.11895388  
61.11895388  
61.11895388  
61.11895388  
61.11895388  
60.62205182  
60.62205182  
60.62205182



53.66542292  
53.16852086  
53.16852086  
53.16852086  
53.16852086  
53.16852086  
53.16852086  
53.16852086  
52.67161879  
52.67161879  
52.17471673  
52.17471673  
52.17471673  
52.17471673  
51.67781466  
51.67781466  
51.67781466  
51.1809126  
51.1809126  
51.1809126  
51.1809126  
51.1809126  
51.1809126  
50.68401054  
50.68401054  
50.68401054  
50.18710847  
50.18710847  
49.69020641  
49.69020641  
49.69020641  
49.69020641  
49.19330434  
49.19330434  
49.19330434  
49.19330434  
49.19330434  
48.69640228  
48.69640228  
48.69640228  
48.19950022  
48.19950022  
48.19950022  
47.70259815  
47.70259815

47.70259815  
47.70259815  
47.70259815  
47.20569609  
47.20569609  
47.20569609  
47.20569609  
46.70879402  
46.70879402  
46.70879402  
46.70879402  
46.21189196  
46.21189196  
46.21189196  
45.7149899  
45.7149899  
45.7149899  
45.7149899  
45.21808783  
45.21808783  
44.72118577  
44.72118577  
44.2242837  
44.2242837  
44.2242837  
44.2242837  
44.2242837  
44.2242837  
44.2242837  
44.2242837  
43.72738164  
43.72738164  
43.72738164  
43.72738164  
43.72738164  
43.23047958  
43.23047958  
43.23047958  
43.23047958  
42.73357751  
42.73357751  
42.73357751  
42.23667545  
42.23667545

42.23667545  
42.23667545  
42.23667545  
42.23667545  
41.73977338  
41.73977338  
41.73977338  
41.73977338  
41.73977338  
41.73977338  
41.73977338  
41.73977338  
41.73977338  
41.73977338  
41.73977338  
41.24287132  
41.24287132  
41.24287132  
41.24287132  
41.24287132  
41.24287132  
41.24287132  
41.24287132  
40.74596925  
40.24906719  
40.24906719  
40.24906719  
40.24906719  
40.24906719  
40.24906719  
40.24906719  
39.75216513  
39.75216513  
39.75216513  
39.25526306  
39.25526306  
39.25526306  
39.25526306  
39.25526306  
38.758361  
38.758361  
38.758361  
38.758361  
38.26145893  
37.76455687  
37.76455687  
37.76455687  
37.76455687

37.76455687  
37.76455687  
37.26765481  
37.26765481  
37.26765481  
37.26765481  
37.26765481  
37.26765481  
37.26765481  
37.26765481  
37.26765481  
37.26765481  
36.77075274  
36.77075274  
36.77075274  
36.77075274  
36.27385068  
36.27385068  
36.27385068  
36.27385068  
36.27385068  
35.77694861  
35.77694861  
35.28004655  
35.28004655  
35.28004655  
35.28004655  
35.28004655  
35.28004655  
35.28004655  
35.28004655  
35.28004655  
34.78314449  
34.78314449  
34.78314449  
34.78314449  
34.78314449  
34.78314449  
34.78314449  
34.78314449  
34.28624242  
34.28624242  
34.28624242  
34.28624242  
34.28624242

34.28624242  
34.28624242  
34.28624242  
33.78934036  
33.78934036  
33.78934036  
33.78934036  
33.78934036  
33.78934036  
33.29243829  
33.29243829  
33.29243829  
33.29243829  
33.29243829  
33.29243829  
33.29243829  
33.29243829  
32.79553623  
32.79553623  
32.79553623  
32.79553623  
32.79553623  
32.79553623  
32.79553623  
32.79553623  
32.29863417  
32.29863417  
32.29863417  
32.29863417  
32.29863417  
32.29863417  
31.8017321  
31.8017321  
31.8017321  
31.8017321  
31.8017321  
31.8017321  
31.8017321  
31.8017321  
31.8017321  
31.8017321  
31.8017321  
31.8017321  
31.8017321  
31.8017321  
31.8017321  
31.8017321  
31.8017321  
31.30483004  
31.30483004  
31.30483004  
31.30483004  
30.80792797  
30.80792797

30.80792797  
30.80792797  
30.80792797  
30.31102591  
30.31102591  
29.81412384  
29.81412384  
29.81412384  
29.81412384  
29.31722178  
29.31722178  
28.82031972  
28.82031972  
28.82031972  
28.82031972  
28.82031972  
28.82031972  
28.82031972  
28.82031972  
28.82031972  
28.32341765  
28.32341765  
28.32341765  
28.32341765  
28.32341765  
28.32341765  
28.32341765  
28.32341765  
28.32341765  
28.32341765  
28.32341765  
27.82651559  
27.82651559  
27.82651559  
27.82651559  
27.82651559  
27.82651559  
27.32961352  
27.32961352  
27.32961352  
27.32961352  
27.32961352  
26.83271146  
26.83271146  
26.83271146  
26.83271146  
26.83271146







19.87608256  
19.87608256  
19.87608256  
19.87608256  
19.87608256  
19.87608256  
19.87608256  
19.87608256  
19.3791805  
19.3791805  
19.3791805  
19.3791805  
19.3791805  
18.88227844  
18.88227844  
18.88227844  
18.88227844  
18.88227844  
18.88227844  
18.88227844  
18.88227844  
18.38537637  
18.38537637  
18.38537637  
18.38537637  
18.38537637  
17.88847431  
17.88847431  
17.88847431  
17.88847431  
17.88847431  
17.88847431  
17.88847431  
17.88847431  
17.88847431  
17.88847431  
17.39157224  
17.39157224  
17.39157224  
17.39157224  
17.39157224  
16.89467018  
16.89467018  
16.89467018  
16.89467018  
16.89467018























Oligo name

B153

H180

H186

H293

H294

H360

H366

H366

H370

H371

H372

H378

H379

H433

H434

H435

H436

H521

H522

H555

H557

H558

H559

H612

H613

H614

H615

H616

H617

H618

H619

H620

H621

H622

H623

H624

H625

H626

H627

H628

H629

H630

H631  
H632  
H633  
H634  
H635  
H636  
H637  
H638  
H639  
H641  
H642  
H643  
H644  
H645  
H646  
H647  
H648  
H649  
H650  
H651  
H652  
H653  
H654  
H655  
H656  
H657  
H658  
H661  
H668  
H669  
H670  
H671  
H672  
H673  
H662  
H690  
H691  
H694  
H695  
H700  
H701  
H702  
H703

JM126  
JM127



Oligo sequence (5'-3')

CTCGTACAGTGAACCTTTTTACC  
TCTGGTAGAAAAGATATCCTACGAG  
NNNNNGTCCAAAATTTTTAGACAAAATAGTC  
GCAAAAATGGATAAGAAATACTCAATAGGC  
TATTGAGTATTTCTTATCCATTTTTGCCTCC  
NNNNNGCTTAGCTGAGACAAATAGTGCG  
NNNNNGCTAAAACAGCATAGCTCTAAAACG  
NNNNNGCTAAAACAGCATAGCTCTAAAACG  
NNNNNGACAGGGGCTTTTCAAGACTG  
NNNNNGACGAAGAAATCAACCAGCGC  
NNNNNACTAGGGGCTTTTCAAGACTG  
CAGGGGCTTTTCAAGACTGNNNNNNNNNNGAGACAAATAGTGCG  
CAGTCTTGAAAAGCCCCTG  
AAACAAACAGTGACAGAACTATTGAGTACGAGGG  
AAAACCCTCGTACTCAATAGTTTCTGTCAGTGT  
AAACAGAAAACAGTGACAGAACTATTGAGTACGG  
AAAACCGTACTCAATAGTTTCTGTCAGTGTCT  
GCGGCCTCTAATACGACTCACTATAGGGCATATTAGATCGAGTCAAGGGTTTTAGAGCTAGAAATAGCA  
GCGGCCTCTAATACGACTCACTATAGGGAGACATATTAGATCGAGTCAGTTTTAGAGCTAGAAATAGCA  
NNNNNTCACTCGTACAGTGAACCTTTTTACC  
CAGAATCCACGAGATCTGTGCCAGTTCGTAATGTCTGG  
TACGAACTGGCACAGATCTCGTGGATTCTGTGATTTGG  
CCTTCAGGTTATGACCCGTTTGTGAACTAATGGGTGC  
ATGAATGGATTGAAGAGAACACAGACGAACAGG  
CCTGTTCTGTGTTCTCTTCAATCCATTCAT  
TTAACCAAGCAATAGATGAATGGATTGAAGAGAACACAGACGAACAGGACAGACTAATTA  
AGTTAATTAGTCTGTCCTGTTCTGTGTTCTCTTCAATCCATTCATCTATTGCTTGGTTAA  
AGAAATTATCGAATACTTAAATAAAAAAGCAGG  
CCTGCTTTTTATTTAAGTATTCGATAATTTCT  
TTCCATTCCCTATAAAGAAATTATCGAATACTTAAATAAAAAAGCAGGAAAGCATTTTAAACA  
TGTTTAAAATGCTTCTGCTTTTTATTTAAGTATTCGATAATTTCTTATAGGGAATGGAA  
ATGAATGGATTGAAGCTTAAATAAAAAAGCAGG  
CCTGCTTTTTATTTAAGCTTCAATCCATTCAT  
AGAAATTATCGAATAAGAACACAGACGAACAGG  
CCTGTTCTGTGTTCTTATTGATAATTTCT  
ATGAATGGATTGAAGAGAACATAAAAAAGCAGG  
CCTGCTTTTTATGTTCTCTTCAATCCATTCAT  
ATGAATGGATGAATACTTAAACAGACGAACAGG  
CCTGTTCTGTGTTAAGTATTCATCCATTCAT  
ATGAATGGATGAATACTTAAATAAAAAAGCAGG  
CCTGCTTTTTATTTAAGTATTCATCCATTCAT  
AGAAATTATCTGAAGAGAACACAGACGAACAGG

CCTGTTCTGTGTTCTCTTCAGATAATTTCT  
AGAAATTATCTGAAGAGAACATAAAAAAGCAGG  
CCTGCTTTTTATGTTCTCTTCAGATAATTTCT  
AGAAATTATCGAATACTTAAACAGACGAACAGG  
CCTGTTCTGTGTTAAGTATTCGATAATTTCT  
TTCCATTCCCTATAAATGAATGGATTGAAGAGAACACAGACGAACAGGAAAGCATTTTAAACA  
TGTTTAAATGCTTTCCTGTTCTGTGTTCTCTTCAATCCATTCATTTATAGGGAATGGAA  
TTAACCAAGCAATAGAGAAATTATCGAATACTTAAATAAAAAAGCAGGACAGACTAATTA  
AGTTAATTAGTCTGTCTGCTTTTTTATTTAAGTATTCGATAATTTCTCTATTGCTGGTTAA  
AAACATGAATGGATTGAAGAGAACACAGACGAACG  
AAAACGTTCTGTGTTCTCTTCAATCCATTCAT  
AAACAGAAATTATCGAATACTTAAATAAAAAAGCG  
AAAACGCTTTTTTATTTAAGTATTCGATAATTTCT  
ATGAATGGATTGAAGAGAACACAGACGAACATT  
AATGTTCTGTGTTCTCTTCAATCCATTCAT  
TTAACCAAGCAATAGATGAATGGATTGAAGAGAACACAGACGAACATTACAGACTAATTA  
AGTTAATTAGTCTGTAATGTTCTGTGTTCTCTTCAATCCATTCATCTATTGCTGGTTAA  
AGAAATTATCGAATACTTAAATAAAAAAGCATT  
AATGCTTTTTTATTTAAGTATTCGATAATTTCT  
TTCCATTCCCTATAAAGAAATTATCGAATACTTAAATAAAAAAGCATTAAAGCATTTTAAACA  
TGTTTAAATGCTTAAATGCTTTTTTATTTAAGTATTCGATAATTTCTTTATAGGGAATGGAA  
TTCCATTCCCTATAAAGAAATTATCGAATACTTAAATAAAAAAGCAGGGGAGGGGTTTAAACA  
TGTTTAAACCCCTCCCCTGCTTTTTTATTTAAGTATTCGATAATTTCTTTATAGGGAATGGAA  
CACATCAATTAGTAAGACGCCAAAAGTAACAGG  
CCTGTTACTTTTGGCGTCTTACTAATTGATGTG  
ATAATAATGAACATGTCTTGTCACAGTTTCAGG  
CCTGAACTGTGACAAGACATGTTTATTAT  
AGAAATTATCGAATACTTAAATCACAGTTTCAGG  
ATAATAATGAACATGTCTTGACAGACGAACAGG  
CCTGTTCTGTCAAGACATGTTTATTAT  
ATAATAATGATGAAGAGAACTCACAGTTTCAGG  
CCTGAACTGTGAGTTCTCTTCATCATTATTAT  
ATGAATGGATACATGTCTTGTCACAGTTTCAGG  
CCTGAACTGTGACAAGACATGTATCCATTCAT  
CCTGAACTGTGATTAAGTATTCGATAATTTCT  
AAAGGATACGTGTAAAGACATATTAGATCGAGTCAAGGAGGTTTTG  
CAAACCTCCTTGACTCGATCTAATATGTCTTTACACGTATCCTTT  
CCTCTAATACGACTCACTATAGGTGAAGAGAACACAGACGAACGTTTAAAGAGCTATGC  
CCTCTAATACGACTCACTATAGGAATACTTAAATAAAAAAGCGTTTAAAGAGCTATGC  
TATAAAGAAATTATCGAATACTTAAACCGATCAGTAGGAAAGC  
GCTTTCCTACTGATCGGTTTAAAGTATTCGATAATTTCTTTATA  
TATAAAGAAATTATCGAATACTTAAATTAATGACTAAGGAAAGC  
GCTTTCCTAGTCATTAATTAAGTATTCGATAATTTCTTTATA

ATGAAGATTATTTCTTAATAACTAAAAATATGGTATAATTAATACCAGCAGTCGGATACC  
GGTATCCGACTGCTGGTATTAATTATACCATATTTTTAGTTATTAAGAAATAATCTTCAT
