# Supplementary material
Source: PubMed Central journal article supplement (PMC6640137)
Supplement: NIHMS1040881-supplement-Heler_CellHostMicrobe_2019_Suppl_Info.pdf [file NIHMS1040881-supplement-Heler_CellHostMicrobe_2019_Suppl_Info.pdf]

## SUPPLEMENTAL FIGURES

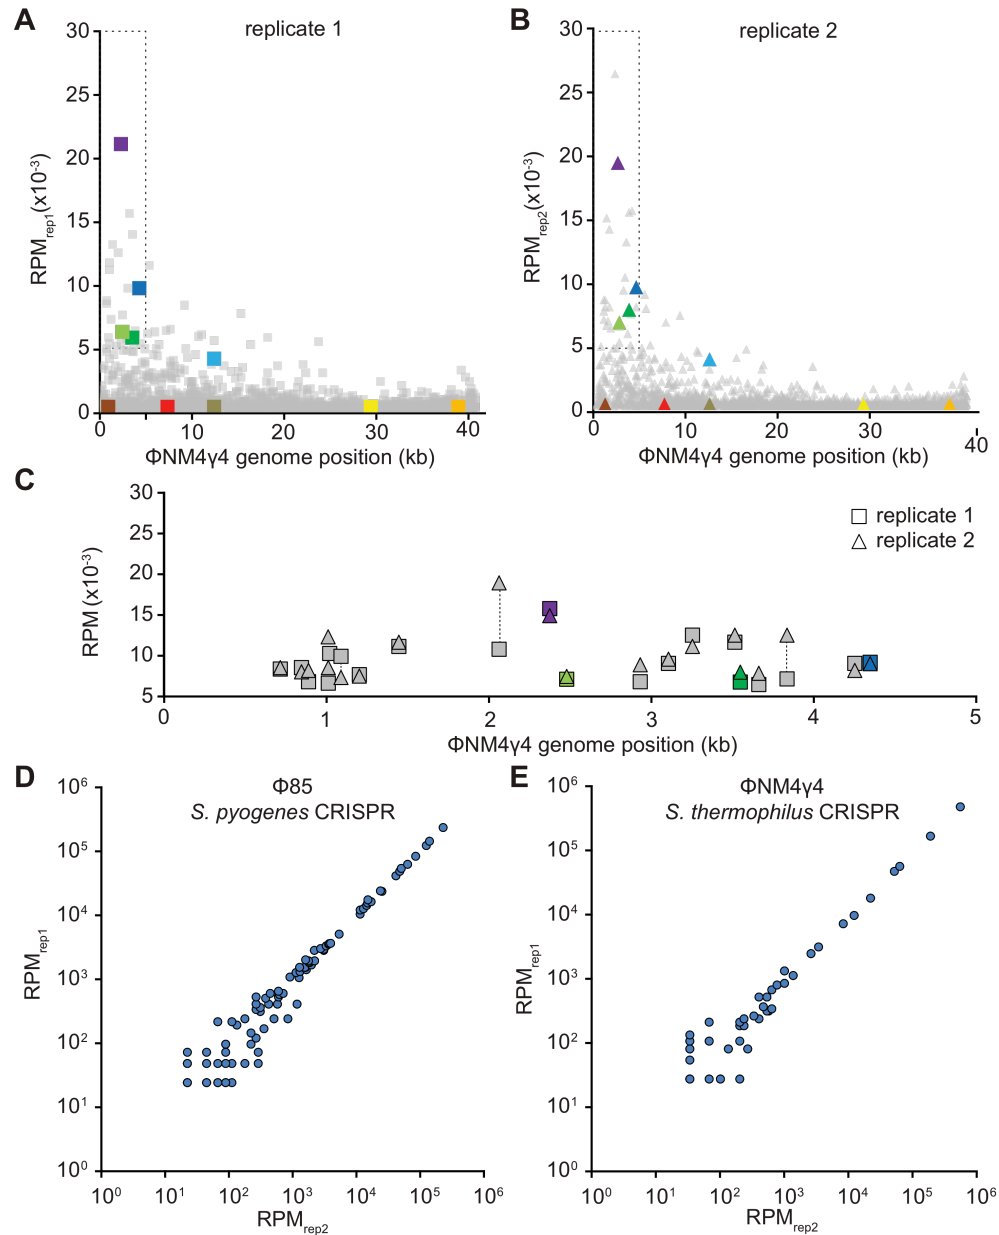

**Figure S1. Biased sampling of phage DNA protospacers is a feature of other bacteriophages and type II CRISPR-Cas systems. Related to Fig. 1. (A), (B)** Abundance (in reads per million, RPM) of  $\phi$ NM4 $\gamma$ 4 viral sequences incorporated as spacers into the CRISPR array, mapped against location on the phage genome, in duplicate (raw data for Figure 1B and 1C). **(C)** Overlap of data in **(A)** and **(B)**, zoomed on the first 5 kb of the viral genome. Only spacers with RPM > 5,000 are shown. **(D)** RPM values of spacers sampled in two replicates during infection with lytic phage  $\phi 85$  of cells harboring the *Streptococcus pyogenes* CRISPR-Cas system. **(E)** RPM values of spacers sampled in two replicates during infection with  $\phi$ NM4 $\gamma$ 4 of cells harboring the *Streptococcus thermophilus* type II-A CRISPR3 system.

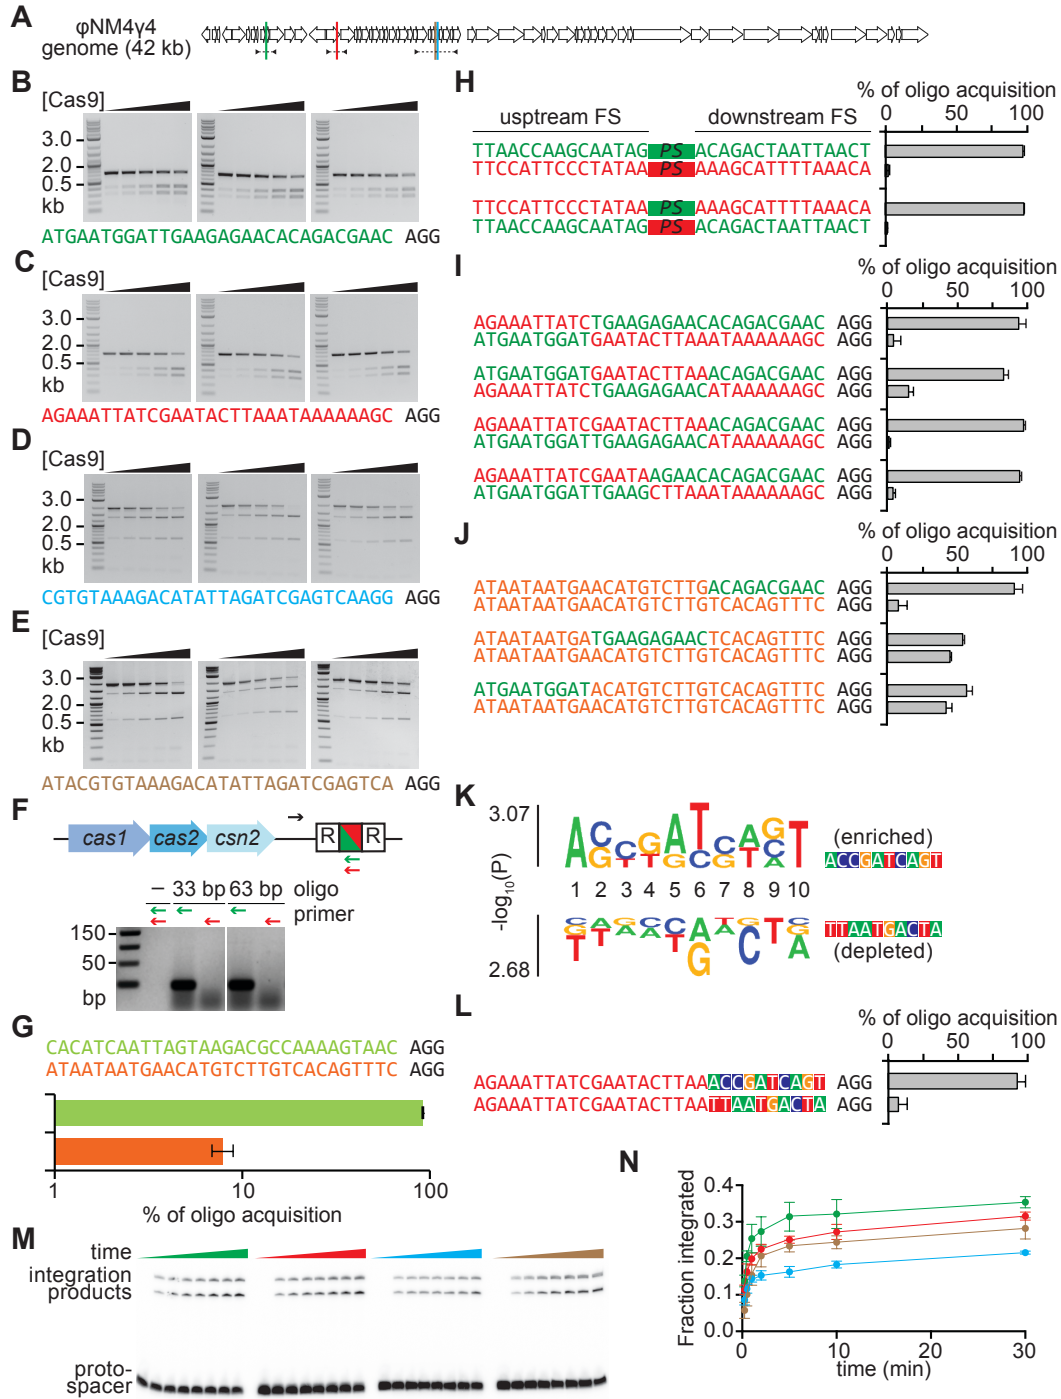

**Figure S2. High and low abundance spacers have different acquisition rates but similar interference efficiencies. Related to Fig. 2. (A)** Location on the phage genome of the protospacers specified by the spacers colored dark green, red, light blue and tan in Figure 2A. Arrowheads show the target region amplified to generate substrates for in vitro cleavage assays. **(B-E)** In vitro cleavage of amplified phage targets (10 nM) incubated for 5 minutes with various concentrations of Cas9 (6.26, 12.5, 25, 50 and 100 nM) loaded with sgRNAs specified by the four spacers shown in Figure

2A; in triplicate. Cleavage products were separated by agarose gel electrophoresis and stained with ethidium bromide. **(F)** Qualitative PCR assay to assess the integration of low abundance (Figure 1A, red) and high abundance (Figure 1A, dark green) spacers after electroporation of the corresponding dsDNA oligonucleotides mixed in a 1:1 molar ratio. Two dsDNA oligonucleotides were tested: 33 bp (protospacer + PAM sequences) or 63 bp (15 bp upstream + protospacer + PAM + 15 bp downstream sequences). Black arrow, forward primer; green and red arrows; reverse primers that specifically anneal on the integrated spacers. **(G)** Relative acquisition rates (%) of spacers following electroporation of a pairs of high/low abundance dsDNA oligonucleotides (light green/orange spacers in Figure 1C). **(H)** Relative acquisition rates (%) of spacers following electroporation of 2 pairs of dsDNA oligonucleotides with swapped 15-nt upstream and downstream flanking sequences of the dark green and red targets. PS, protospacer. **(I)** Relative acquisition rates (%) of spacers following electroporation of 4 pairs of dsDNA oligonucleotides with swapped 10- or 15-nt spacer sequences of the dark green and red targets. **(J)** Relative acquisition rates (%) of spacers following electroporation of 3 pairs of dsDNA oligonucleotides. In each pair, one of the dsDNA oligonucleotides has the low abundance, orange spacer sequence shown in **(G)** and is co-electroporated with another containing a different PAM-distal, central or PAM-proximal, 10-nt sequence from the dark green spacer (Figure 2A).with swapped 10- or 15-nt spacer sequences of the dark green and red targets. **(K)** Unweighted probability logo of the top 1% acquired spacer sequences generated using kpLogo (showing only 10 bp, PAM-proximal sequence). Nucleotides shown on top were enriched, while the ones shown on the bottom were depleted in the spacers used to create the logo. Enriched or depleted consensus sequences are shown to the right. **(L)** Relative acquisition rates (%) of spacers following electroporation of two dsDNA oligonucleotides, each containing the PAM-distal and central regions of the low abundance, red spacer (Figure 2A) and the 10-nt, PAM-proximal, enriched or depleted sequences identified in **(K)**. **(M)** Radiolabeled dsDNA oligonucleotides with the low and high abundant spacer sequences shown in Figure 2A, containing 4-nt 3' overhangs, were incubated with a plasmid carrying the type II-A CRISPR array and purified *S. pyogenes* Cas1-Cas2 complex for increasing amounts of time (0.25, 0.5, 1, 2, 5, 10, and 30 minutes). The products of the reaction were separated by ethidium bromide-stained agarose gel electrophoresis. **(N)** shown in **(M)**.

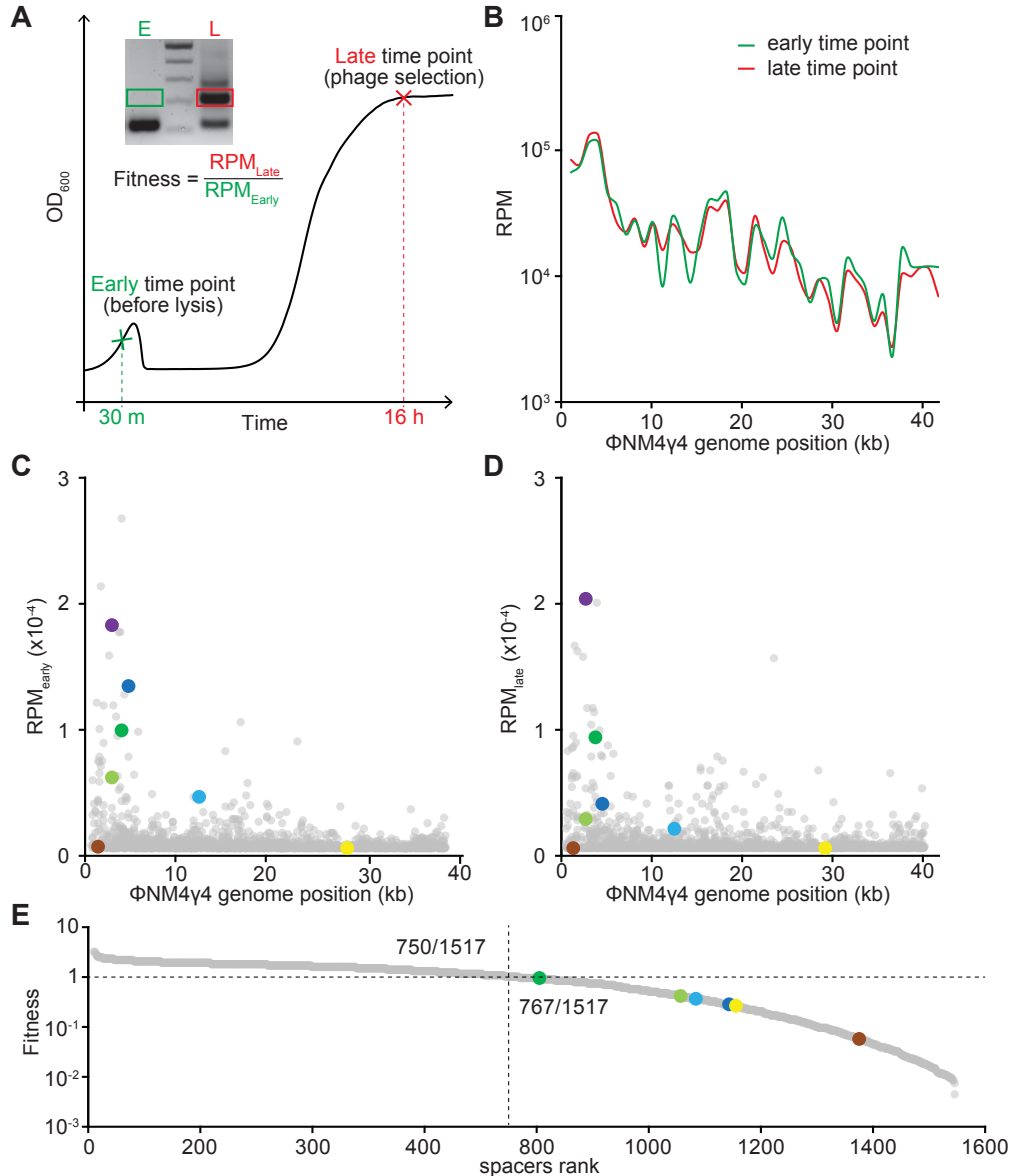

**Figure S3. Spacer distribution due to initial acquisition is not perturbed over the course of phage infection. Related to Fig. 3.** (A) Diagram of assay used to measure the effects of targeting efficiency on spacer abundance. Typically, when challenged by the lytic phage  $\phi$ NM4 $\gamma$ 4, staphylococci harboring the *S. pyogenes* type II-A CRISPR-Cas system continue growing for ~ 45 minutes (measured by the OD<sub>600</sub> of the culture) and then succumb to infection. The small proportion of cells that acquire new spacers survive and enable the regrowth of the culture. DNA was prepared from cells isolated after 30 minutes (early time point) and 16 hours (late time point) of infection. Inset: amplification of the CRISPR array from the extracted DNA at each time point. Boxes show the PCR product corresponding to the expanded CRISPR locus, which is barely visible in the early sample due to the low proportion of staphylococci that acquire new spacers. (B) Average abundance (RPM per 1-kb bins) of  $\phi$ NM4 $\gamma$ 4 viral sequences incorporated as spacers into the CRISPR array, mapped against location on the phage

genome, in the early and late time point libraries (red and green traces). **(C)** Abundance (in reads per million, RPM) of  $\phi$ NM4 $\gamma$ 4 viral sequences incorporated as spacers into the CRISPR array, mapped against location on the phage genome in the early time point. **(D)** Same as **(C)**, for late time point. **(E)** Spacers ranked by decreasing fitness (ratio of abundance in late time point divided by abundance in early time point).

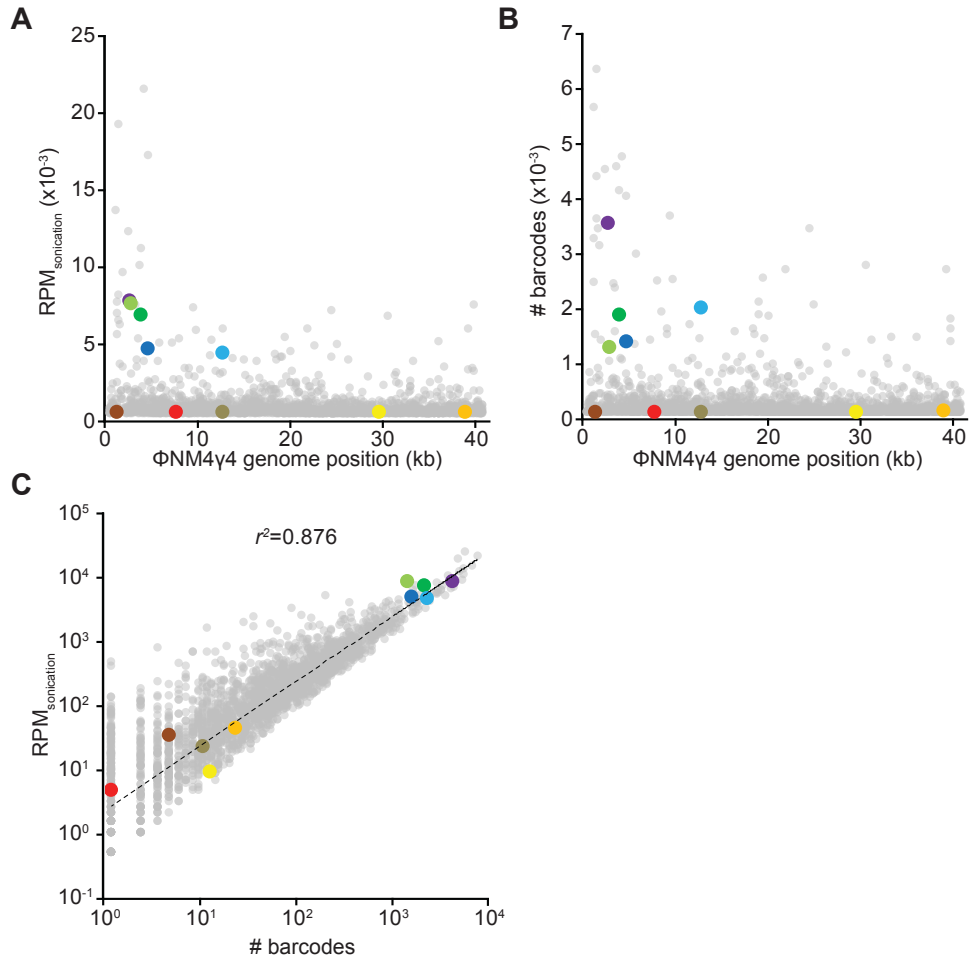

**Figure S4. Oversampling of phage protospacers is due to higher rates of acquisition. Related to Fig. 4.** (A) Abundance (RPM) of spacers incorporated into the CRISPR array, mapped against location on the phage genome, following electroporation of sheared phage DNA. (B) Same as (A), but plotting the number of different barcodes for each acquired spacer sequence. (C) Abundance of individual spacers following electroporation of sonicated phage DNA plotted against barcodes as a measure of the number of times each spacer was acquired.

## SUPPLEMENTAL TABLES

**Table S1. Oligonucleotides used in this study.** Related to STAR methods.

| Name | Sequence                                                               |
|------|------------------------------------------------------------------------|
| B153 | CTCGTACAGTGAACCTTTTTCCACC                                              |
| H180 | TCTGGTAGAAAAGATATCCTACGAG                                              |
| H186 | NNNNNGTCCAAAATTTTTAGACAAAATAGTC                                        |
| H293 | GCAAAAATGGATAAGAAATACTCAATAGGC                                         |
| H294 | TATTGAGTATTTCTTATCCATTTTTGCCTCC                                        |
| H360 | NNNNNGCTTAGCTGAGACAAATAGTGCG                                           |
| H366 | NNNNNGCTAAAACAGCATAGCTCTAAAACG                                         |
| H366 | NNNNNGCTAAAACAGCATAGCTCTAAAACG                                         |
| H370 | NNNNNGACAGGGGCTTTTCAAGACTG                                             |
| H371 | NNNNNGACGAAGAAATCAACCAGCGC                                             |
| H372 | NNNNNACTAGGGGCTTTTCAAGACTG                                             |
| H378 | CAGGGGCTTTTCAAGACTGNNNNNNNNNGAGACAAATAGTGCG                            |
| H379 | CAGTCTTGAAAAGCCCCTG                                                    |
| H433 | AAACAAACAGTGACAGAACTATTGAGTACGAGGG                                     |
| H434 | AAAACCCTCGTACTCAATAGTTTCTGTCACTGTTT                                    |
| H435 | AAACAGAAAACAGTGACAGAACTATTGAGTACGG                                     |
| H436 | AAAACCCTACTCAATAGTTTCTGTCACTGTTTTCT                                    |
| H521 | GCGGCCTCTAATACGACTCACTATAGGGCATATTAGATCGAGTCAAGGGTTTTAGAGCTAGAAATAGCA  |
| H522 | GCGGCCTCTAATACGACTCACTATAGGGGAGACATATTAGATCGAGTCAGTTTTAGAGCTAGAAATAGCA |
| H555 | NNNNNTCACTCGTACAGTGAACCTTTTTCCACC                                      |
| H557 | CAGAATCCACGAGATCTGTGCCAGTTCGTAATGTCTGG                                 |
| H558 | TACGAACTGGCACAGATCTCGTGGATTCTGTGATTTGG                                 |
| H559 | CCTTCAGGTTATGACCCGTTTGTTGAACTAATGGGTGC                                 |
| H612 | ATGAATGGATTGAAGAGAACACAGACGAACAGG                                      |
| H613 | CCTGTTTCGTCTGTGTTCTCTTCAATCCATTCAT                                     |
| H614 | TTAACCAAGCAATAGATGAATGGATTGAAGAGAACACAGACGAACAGGACAGACTAATTAAT         |
| H615 | AGTTAATTAGTCTGTCCTGTTTCGTCTGTGTTCTCTTCAATCCATTCATCTATTGCTTGGTTAA       |
| H616 | AGAAATTATCGAATACTTAAATAAAAAAGCAGG                                      |
| H617 | CCTGCTTTTTTATTTAAGTATTCGATAATTTCT                                      |
| H618 | TTCCATTCCCTATAAAGAAATTATCGAATACTTAAATAAAAAAGCAGGAAAGCATTITTAACA        |
| H619 | TGTTTAAAATGCTTTCTGCTTTTTTATTTAAGTATTCGATAATTTCTTTATAGGGAATGGAA         |
| H620 | ATGAATGGATTGAAGCTTAAATAAAAAAGCAGG                                      |
| H621 | CCTGCTTTTTTATTTAAGCTTCAATCCATTCAT                                      |
| H622 | AGAAATTATCGAATAAGAACACAGACGAACAGG                                      |
| H623 | CCTGTTTCGTCTGTGTTCTTATTCGATAATTTCT                                     |
| H624 | ATGAATGGATTGAAGAGAACATAAAAAAGCAGG                                      |
| H625 | CCTGCTTTTTTATGTTCTCTTCAATCCATTCAT                                      |

|      |                                                                   |
|------|-------------------------------------------------------------------|
| H626 | ATGAATGGATGAATACTTAAACAGACGAACAGG                                 |
| H627 | CCTGTTTCGTCTGTTTAAAGTATTCATCCATTCAT                               |
| H628 | ATGAATGGATGAATACTTAAATAAAAAAGCAGG                                 |
| H629 | CCTGCTTTTTTATTTAAGTATTCATCCATTCAT                                 |
| H630 | AGAAATTATCTGAAGAGAACACAGACGAACAGG                                 |
| H631 | CCTGTTTCGTCTGTGTTCTCTTCAGATAATTTCT                                |
| H632 | AGAAATTATCTGAAGAGAACATAAAAAAGCAGG                                 |
| H633 | CCTGCTTTTTTATGTTCTCTTCAGATAATTTCT                                 |
| H634 | AGAAATTATCGAATACTTAAACAGACGAACAGG                                 |
| H635 | CCTGTTTCGTCTGTTTAAAGTATTCGATAATTTCT                               |
| H636 | TTCCATTCCCTATAAATGAATGGATTGAAGAGAACACAGACGAACAGGAAAGCATTTTAAACA   |
| H637 | TGTTTAAAATGCTTTTCCTGTTTCGTCTGTGTTCTCTTCAATCCATTCATTTATAGGGAATGGAA |
| H638 | TTAACCAAGCAATAGAGAAATTATCGAATACTTAAATAAAAAAGCAGGACAGACTAATTAECT   |
| H639 | AGTTAATTAGTCTGTCCTGCTTTTTTATTTAAGTATTCGATAATTTCTCTATTGCTTGTTAA    |
| H641 | AAACATGAATGGATTGAAGAGAACACAGACGAACG                               |
| H642 | AAAACGTTTCGTCTGTGTTCTCTTCAATCCATTCAT                              |
| H643 | AAACAGAAATTATCGAATACTTAAATAAAAAAGCG                               |
| H644 | AAAACGCTTTTTTATTTAAGTATTCGATAATTTCT                               |
| H645 | ATGAATGGATTGAAGAGAACACAGACGAACATT                                 |
| H646 | AATGTTTCGTCTGTGTTCTCTTCAATCCATTCAT                                |
| H647 | TTAACCAAGCAATAGATGAATGGATTGAAGAGAACACAGACGAACATTACAGACTAATTAECT   |
| H648 | AGTTAATTAGTCTGTAATGTTTCGTCTGTGTTCTCTTCAATCCATTCATCTATTGCTTGTTAA   |
| H649 | AGAAATTATCGAATACTTAAATAAAAAAGCATT                                 |
| H650 | AATGCTTTTTTATTTAAGTATTCGATAATTTCT                                 |
| H651 | TTCCATTCCCTATAAAGAAATTATCGAATACTTAAATAAAAAAGCATTAAAGCATTTTAAACA   |
| H652 | TGTTTAAAATGCTTTAATGCTTTTTTATTTAAGTATTCGATAATTTCTTTATAGGGAATGGAA   |
| H653 | TTCCATTCCCTATAAAGAAATTATCGAATACTTAAATAAAAAAGCAGGGGAGGGGTTTAAACA   |
| H654 | TGTTTAAACCCTCCCTGCTTTTTTATTTAAGTATTCGATAATTTCTTTATAGGGAATGGAA     |
| H655 | CACATCAATTAGTAAGACGCCAAAAGTAACAGG                                 |
| H656 | CCTGTTACTTTTGGCGTCTTACTAATTGATGTG                                 |
| H657 | ATAATAATGAACATGTCTTGTCACAGTTTCAGG                                 |
| H658 | CCTGAAACTGTGACAAGACATGTTTCATTATTAT                                |
| H661 | AGAAATTATCGAATACTTAAATCACAGTTTCAGG                                |
| H668 | ATAATAATGAACATGTCTTGACAGACGAACAGG                                 |
| H669 | CCTGTTTCGTCTGTCAAGACATGTTTCATTATTAT                               |
| H670 | ATAATAATGATGAAGAGAACTCACAGTTTCAGG                                 |
| H671 | CCTGAAACTGTGAGTTCTCTTCATCATTATTAT                                 |
| H672 | ATGAATGGATACATGTCTTGTCACAGTTTCAGG                                 |
| H673 | CCTGAAACTGTGACAAGACATGTATCCATTCAT                                 |
| H662 | CCTGAAACTGTGATTAAGTATTCGATAATTTCT                                 |
| H690 | AAAGGATACGTGTAAAGACATATTAGATCGAGTCAAGGAGGTTTTG                    |



|       |                                                               |
|-------|---------------------------------------------------------------|
| H691  | CAAAACCTCCTTGACTCGATCTAATATGTCTTTACACGTATCCTTT                |
| H694  | CCTCTAATACGACTCACTATAGGTGAAGAGAACACAGACGAACGTTTAAGAGCTATGC    |
| H695  | CCTCTAATACGACTCACTATAGGAATACTTAAATAAAAAAGCGTTTAAGAGCTATGC     |
| H700  | TATAAAGAAATTATCGAATACTTAAACCGATCAGTAGGAAAGC                   |
| H701  | GCTTTCCTACTGATCGGTTTAAGTATTCGATAATTTCTTTATA                   |
| H702  | TATAAAGAAATTATCGAATACTTAAATTAATGACTAAGGAAAGC                  |
| H703  | GCTTTCCTTAGTCATTAATTAAGTATTCGATAATTTCTTTATA                   |
| JM126 | ATGAAGATTATTTCTTAATAACTAAAAATATGGTATAATTAATACCAGCAGTCGGATACC  |
| JM127 | GGTATCCGACTGCTGGTATTAATTATAACCATATTTTTAGTTATTAAGAAATAATCTTCAT |
